# Supplementary material for: Functional implications of the exon 9 splice insert in GluK1 kainate receptors
Source: eLife journal article supplement (doi:10.7554/elife.89755), 2023-07-26
Supplement: fig5-figsupp1-data1 [file elife-89755-fig5-figsupp1-data1-v1.pdf]

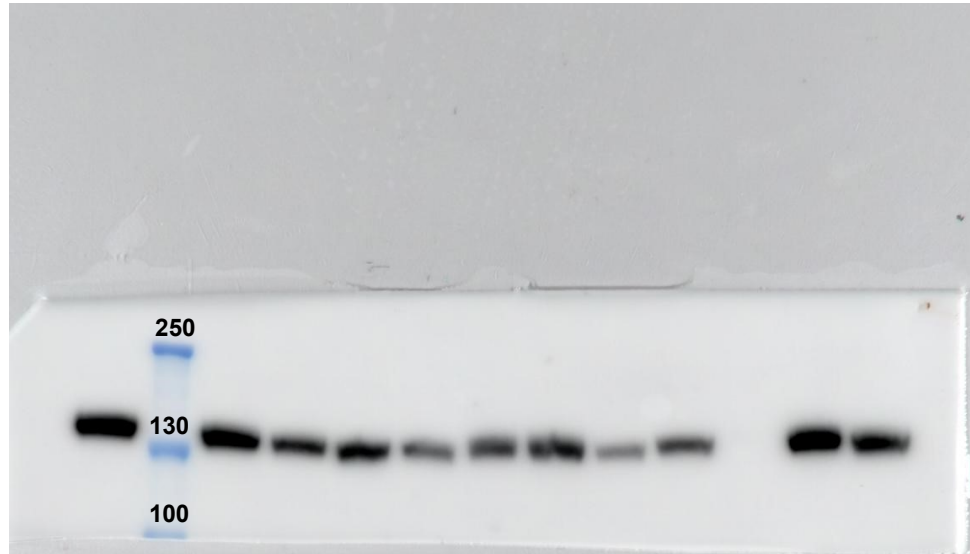

**His**  
**(GluK1 ~135 kDa)**

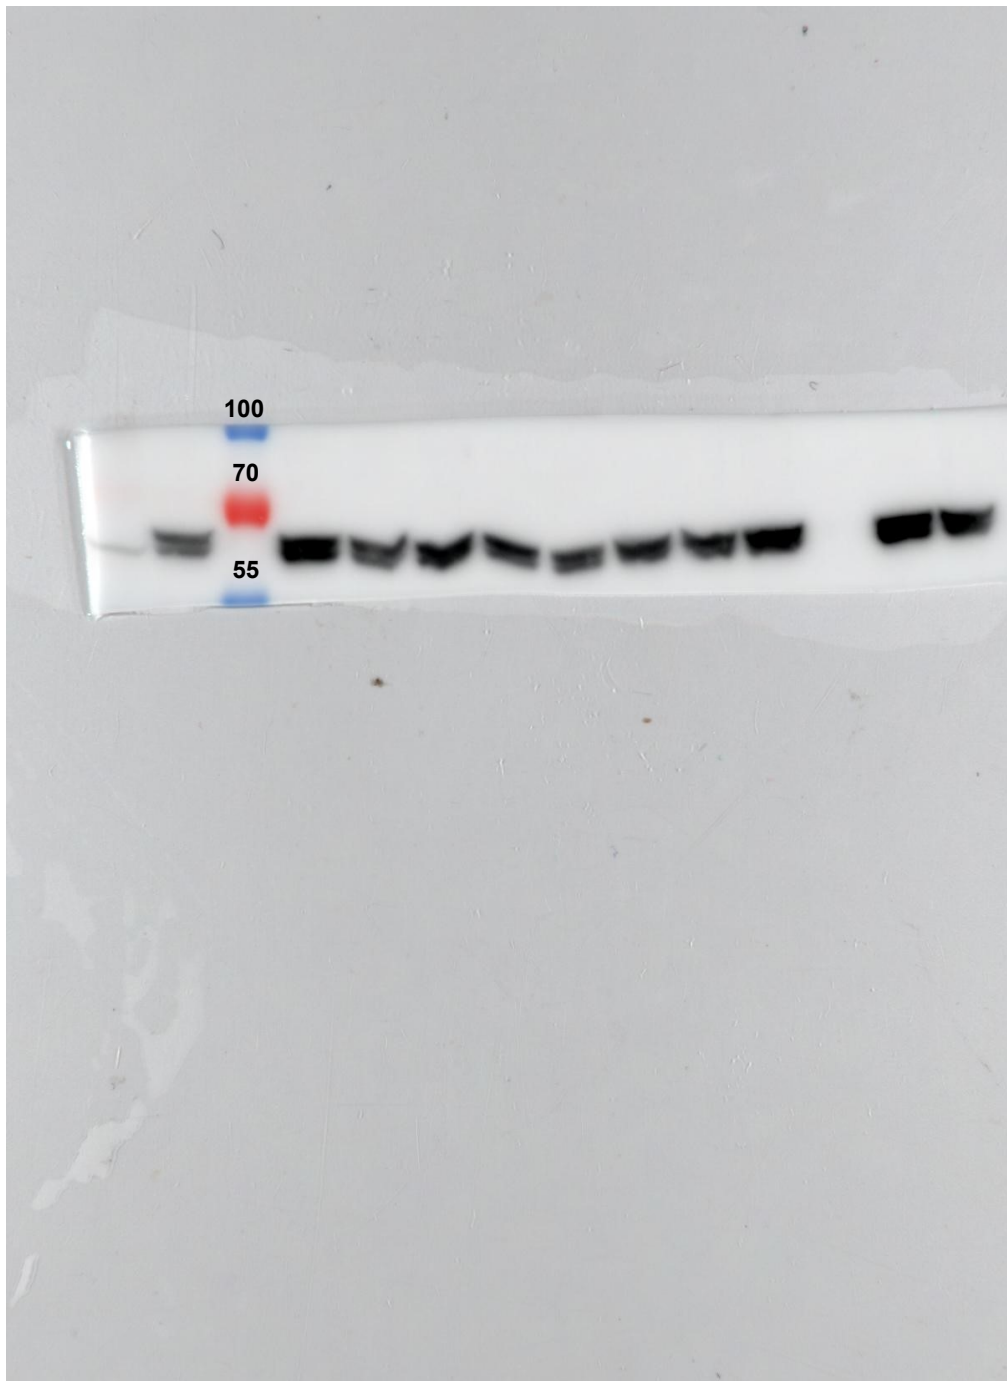

**Neto1**  
**(~58 kDa)**

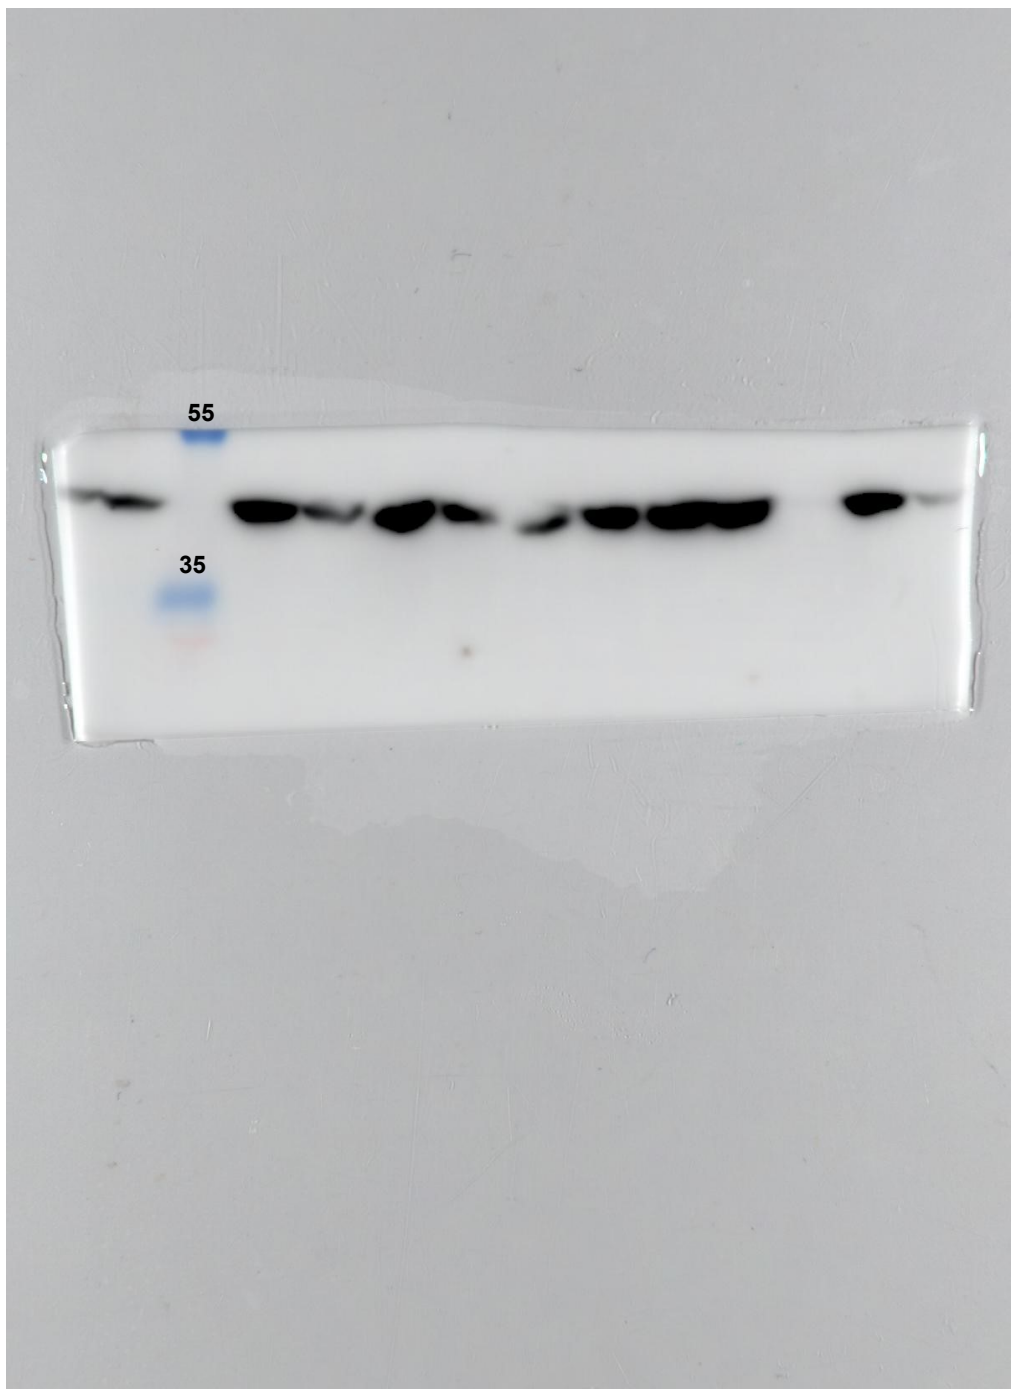

Actin  
(~42 kDa)

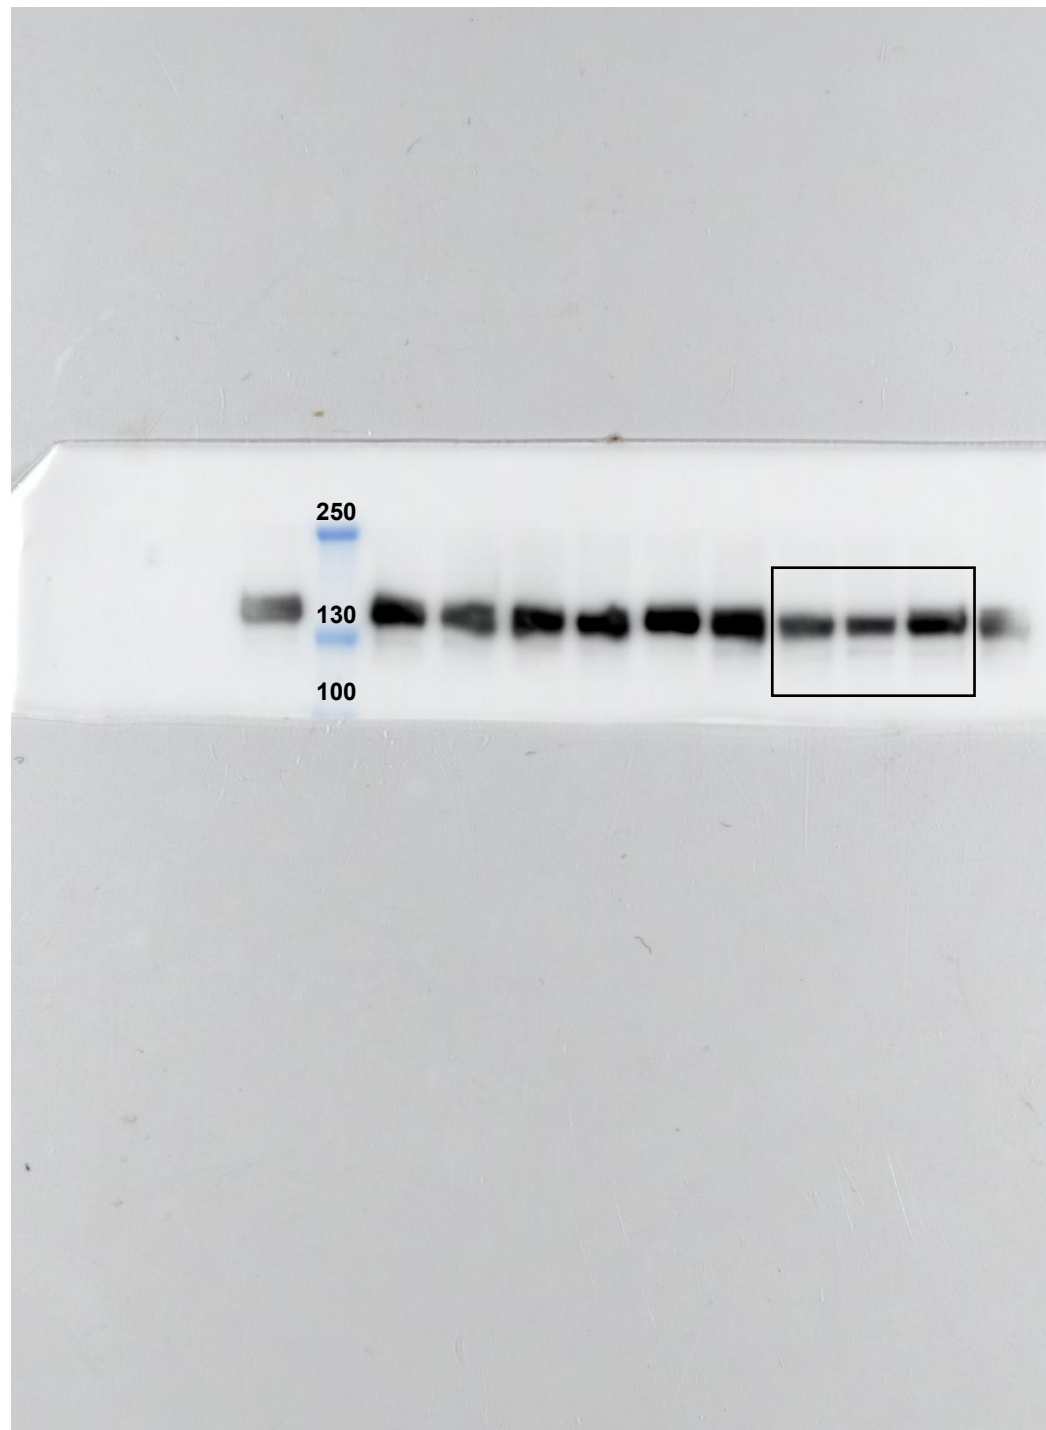

**His**  
**(GluK1 ~135 kDa)**

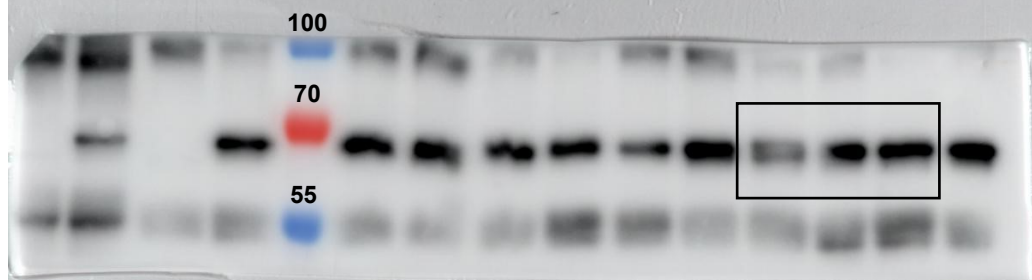

**Neto1**  
**(~58 kDa)**
