# Supplementary material for: Functional implications of the exon 9 splice insert in GluK1 kainate receptors
Source: eLife journal article supplement (doi:10.7554/elife.89755), 2023-07-26
Supplement: fig5-figsupp1-data3 [file elife-89755-fig5-figsupp1-data3-v1.pdf]

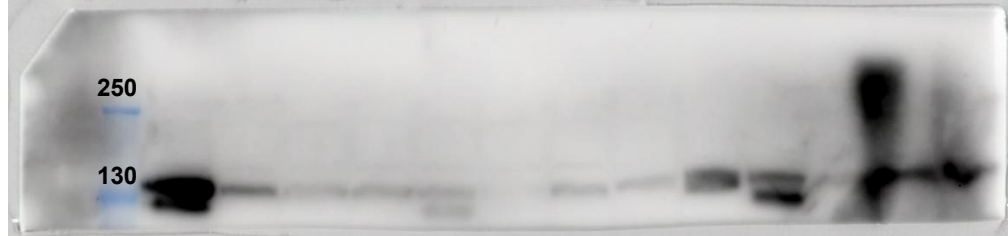

**GFP**  
**(GluK1 ~135 kDa)**

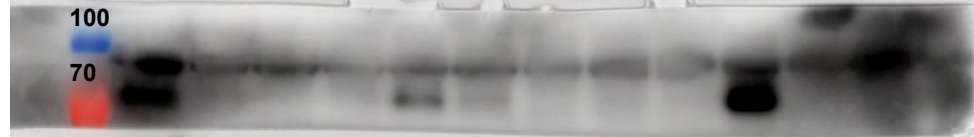

**GFP  
(Neto2  
~84 kDa)**

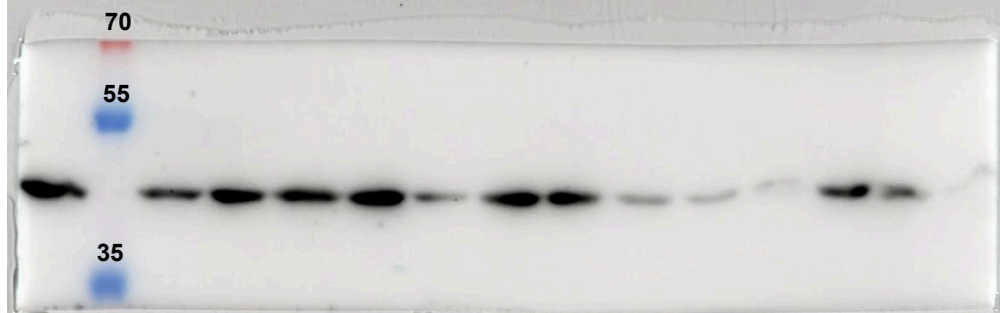

**Actin**  
**(~42 kDa)**

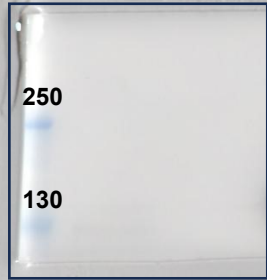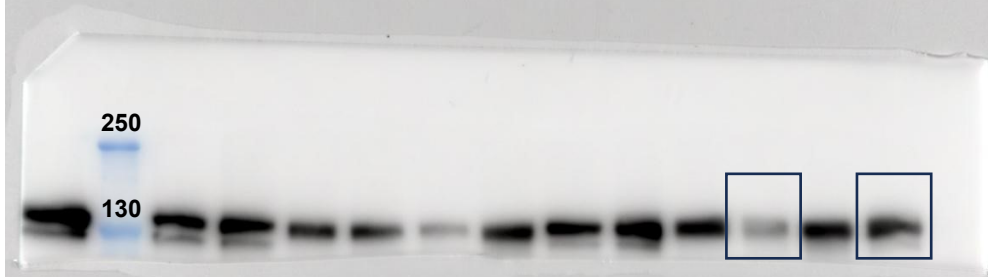

**GFP**  
(GluK1 ~135 kDa)

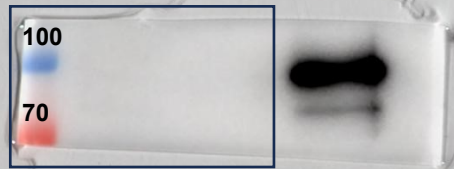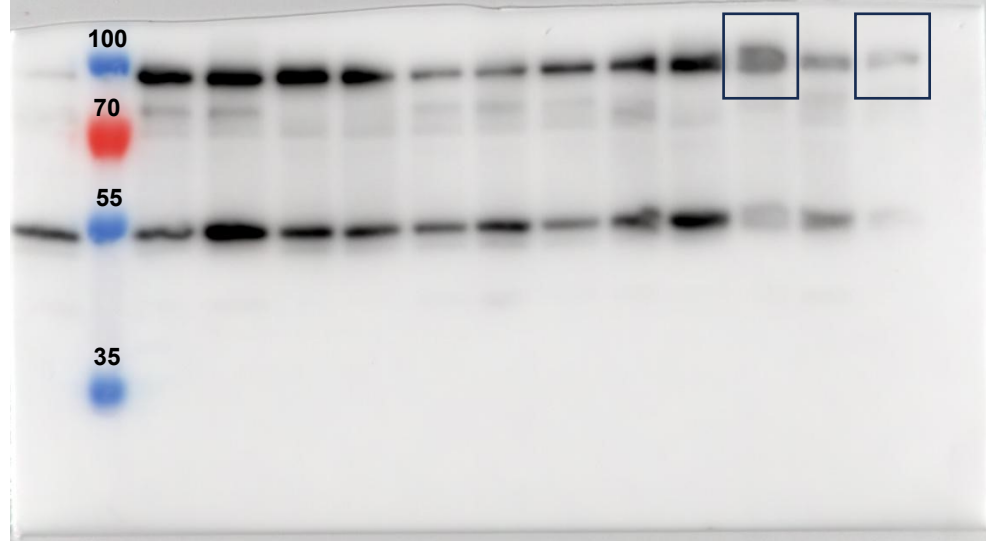

**GFP  
(Neto2  
~84 kDa)**
