# Supplementary material for: Functional implications of the exon 9 splice insert in GluK1 kainate receptors
Source: eLife. 2024 Nov 6;12:RP89755. doi: 10.7554/eLife.89755 (PMC11540303; doi:10.7554/eLife.89755)
Supplement: Figure 1—figure supplement 1—source data 1. [file elife-89755-fig1-figsupp1-data1.xlsx]

## Sheet: Figure 1-figure supplement 1
Exon start position	12 pcw	16 pcw	17 pcw	21 pcw	21 pcw	24 pcw	35 pcw	37 pcw	4 mos	4 mos	10 mos	1 yrs	2 yrs	3 yrs	3 yrs	4 yrs	8 yrs	8 yrs	11 yrs	13 yrs	15 yrs	18 yrs	19 yrs	21 yrs	23 yrs	30 yrs	36 yrs	37 yrs	40 yrs
30909253	4.4991	3.21	5.1077	6.3465	5.1673	4.7386	3.8035	4.4158	5.5089	4.5275	3.1915	3.9896	3.5069	2.6458	4.1441	5.7995	2.7221	1.9877	1.2886	3.162	3.1697	2.9983	3.1408	3.449	2.8541	2.9334	2.1227	2.845	4.8526
30910026	0.125	0	1.8062	5.3131	1.788	0.7231	1.1566	0.7926	1.0866	0.6636	0.7033	0	0	0.5471	0.6827	2.1796	0	0.19	0	0	0	0	0	0.2867	0	0.9958	0	0.3979	0
30910118	1.2629	0	2.4575	4.1685	2.1031	0.891	2.4618	2.25	2.5238	0.8311	0.2038	1.5152	0	0.4572	1.2301	1.2491	0.2984	1.5369	0	0.5746	0.3005	0.4646	0.9548	1.3991	0.6226	0.7215	1.4799	0.6988	1.9406
30925572	1.2409	1.1843	1.4543	2.1799	1.2641	1.1145	0.9577	2.092	0.9832	0.8276	0.6017	0.1432	0.4256	0.4219	0.3994	0.1206	0	0	0	0.6239	0.1308	0.1521	0.161	0	0	0.2375	0	0.2417	0
30927372	4.7079	4.6323	5.4523	6.1823	5.9695	5.3804	3.5206	4.9051	5.4379	4.7982	3.5919	4.3911	2.6573	3.5551	4.3978	5.1028	3.045	3.3961	2.9538	3.9204	3.821	3.1853	4.1488	3.3715	3.5053	4.5252	2.823	3.4299	3.0378
30933944	4.7555	4.9195	5.6501	6.323	5.9827	5.6449	3.6515	5.0087	5.3616	5.1923	3.5062	4.7705	2.7806	3.8418	4.1649	5.0756	3.1533	3.318	3.0345	4.1009	4.3748	1.7522	4.383	3.927	3.6203	4.9304	3.2671	3.4839	2.4614
30949283	5.1569	4.2322	5.251	5.8483	5.6474	5.4982	3.5274	5.1066	5.3891	5.1621	3.4511	4.7779	1.6916	3.4733	3.9904	4.7428	3.4102	3.9233	2.6114	4.213	3.7565	2.1576	3.8186	3.7644	3.5854	4.524	2.65	3.3775	2.0714
30953744	4.2286	4.4111	4.7583	5.8584	5.1572	5.2622	2.4908	5.1627	4.4861	4.7904	2.6695	4.3513	0	2.7821	3.441	4.5087	3.7516	3.7765	2.3985	3.9945	3.7441	1.3678	3.3965	2.7881	2.7976	4.1955	2.7213	3.2844	1.7647
30959685	4.6792	4.8833	4.9713	5.921	5.4593	5.6128	3.4973	4.9721	4.6713	5.1016	2.9039	4.6505	0.2337	3.7151	3.903	4.2626	3.5171	3.5802	2.8626	3.8975	3.9428	1.5988	4.0182	3.2822	3.5328	4.7305	3.0747	3.4946	0.7365
30961158	4.1866	4.1238	4.8952	5.5917	5.3444	5.3181	2.9882	4.5522	4.6626	4.6458	2.413	4.7606	1.3708	2.4444	3.5709	4.3498	2.2834	2.6278	2.4895	4.0044	3.8959	0.7246	3.932	3.8764	3.4095	3.9285	2.7312	3.5089	0
30963431	4.8855	4.2703	5.4385	6.4504	5.7064	5.439	2.6324	4.6862	5.2961	4.5108	3.4812	4.9123	1.5429	2.9264	4.3958	4.6944	2.488	4.9468	2.3584	3.3444	4.7785	0.9542	4.2555	4.2096	3.5164	4.5054	2.7576	3.173	0
30968845	3.7673	0.9586	4.0223	4.5618	4.5774	4.1623	0	3.7694	4.0965	3.7299	2.3676	4.3352	0	1.7085	3.4827	3.3765	2.9853	4.8685	1.7689	2.1986	4.0212	1.1578	3.7998	3.4247	2.7008	4.0184	1.5561	2.2978	0
30971113	4.078	4.1984	4.3966	4.9254	4.7572	5.0724	3.5284	3.8544	4.4111	4.0262	1.7704	4.1505	0.9921	1.7021	2.7128	3.6043	1.8606	2.7107	1.9153	3.0026	3.8028	0.461	3.4026	3.3747	2.9572	4.0312	1.7188	2.5401	0
30973547	0	0	0	0.7513	0	0	0	0	0	0	0	0	0	0	0	0	0	0	0	0	0	0	0	0	0	0	0	0	0
31015141	4.1553	5.0046	4.6036	4.6554	5.2774	4.7569	2.579	4.3395	4.2694	4.7603	2.7842	4.5955	0	2.8933	2.8748	3.61	2.8002	3.1904	2.413	3.311	3.5601	0.7466	3.5815	3.352	3.5275	3.89	2.526	3.4059	0
31023437	4.5093	4.6157	4.9353	5.504	5.5806	5.2484	3.0966	4.4517	4.8175	4.5689	2.9183	4.6623	0	2.3596	3.4868	3.8476	2.9071	4.0588	2.6243	3.9018	4.2268	0.0552	3.9928	3.622	3.4769	4.0639	1.9639	3.0899	1.9846
31027129	4.7546	3.8119	4.9605	5.6571	5.5342	4.9399	1.9647	4.3438	5.0632	4.3352	2.9615	4.9328	0	2.5703	3.1179	4.3666	3.2241	2.2774	2.1792	3.6107	4.0752	0.7291	3.6266	3.4419	2.9103	4.394	2.5393	2.8855	0.9323
31045302	3.887	3.6094	4.1271	4.7766	4.5793	4.86	1.5666	4.0393	4.4761	3.989	2.3305	4.5234	0	2.3662	2.5358	3.8466	2.8378	2.1276	1.5024	3.3228	3.3089	1.0523	3.3547	3.2401	2.5906	3.2039	1.8581	3.2023	1.9076
31062047	3.8926	4.2883	4.2762	5.3392	4.8091	4.9233	2.4294	4.1074	4.0997	4.1783	2.4953	4.3276	0	2.1124	2.8286	3.3781	3.1169	2.7376	1.968	3.5577	3.4647	0.5155	3.6259	3.3794	3.0487	4.3457	1.6919	3.1738	0.7542
31066214	3.8911	4.1338	4.4263	5.5672	4.9661	4.9729	1.9412	4.0959	4.6279	3.9383	2.9926	4.4342	0	1.7337	3.0452	3.9481	2.5117	3.5947	1.7456	3.721	4.409	1.1343	3.1953	3.5967	3.3711	4.291	2.09	3.4063	1.858
31311700	3.7171	4.2502	4.2713	4.2714	4.4476	3.9584	1.8933	3.706	3.532	4.3559	2.8977	4.0876	0.641	2.1829	2.8964	3.0965	2.3696	3.897	0.781	2.9184	3.6883	1.0191	3.1359	2.9038	3.0189	3.5128	1.8836	3.0651	0.4225
