# Supplementary material for: Functional implications of the exon 9 splice insert in GluK1 kainate receptors
Source: eLife. 2024 Nov 6;12:RP89755. doi: 10.7554/eLife.89755 (PMC11540303; doi:10.7554/eLife.89755)
Supplement: Figure 1—source data 1. [file elife-89755-fig1-data1.xlsx]

## Sheet: Figure 1
Age	DFC	VFC	MFC	OFC	M1C	M1C-S1C	PCx	S1C	IPC	A1C	TCx	STC	ITC	Ocx	V1C	HIP	AMY	LGE	MGE	CGE	STR	DTH	MD	URL	CB	CBC
8 pcw	0	0	1.1188	1.2491	0	0	0.1633	0	0	0	0	0	1.0121	0	0	0	0.5262	0	0	0	0	0	0	1.707	0	0
9 pcw	0	0	0.6022	0	0	0	0.3957	0	0	0	0	0	0	0.6058	0	0.3183	1.1504	0	0.7097	0	0	0.6179	0	2.6179	0	0
12 pcw_1	0.6245	0	0	0	0	0	0	0	0	0.4913	0	0	1.1611	0	0	0	0	0	0	0	0.6942	0.7288	0	0	2.6268	3.7673
12 pcw_2	0	0	0.5322	0	0	0	0	0.705	0	0.664	0	0	0	0	0	0	0	0	0	0	0	1.0992	0	0	0	0
12 pcw_3	0	0		0	0	0	0	0	0.1732	0	0	0	0.2924	0	0	0.5371	1.6095	0	0	0	0.8307	0.8328	0	0	0	0
13 pcw_1	0.248	0	0	0.6569	0.4629	0	0	0	0.1534	0.305	0	1.0457	0	0	0	0.7597	0	0	0	0	0	0	0.8435	0	3.5081	0
13 pcw_2	0	0	0	0	0	0	0	0	0	2.0557	0	0.734	1.6652	0	0	1.8003	0	0	0	0	0.6247	0	0	0	3.6579	0
13 pcw_3	0	0.7393	0.5248	0.2925	0	0	0	0	0	1.0419	0	0	0	0	0	0.6409	1.1945	0	0	0	0	0	0	0	0	0
16 pcw_1	0	0.6261	0	0	0	0	0	0	0	1.2187	0	0.6322	1.7593	0	0.1774	1.0657	0	0	0	0	0	0	3.301	0	0	0.9586
16 pcw_2	0	0	0	0.3979	0	0	0	0	0	2.7638	0	0	0	0	0	0	1.2476	0	0	0	0	0	2.2077	0	0	0
16 pcw_3	0.5364	0	0.5854	0	0	0	0	0	0	1.6958	0	0.7252	0	0	0.8784	0	0	0	0	0	1.23	0	3.2351	0	0	0
17 pcw	0	0	0	0	0	0	0	0	0.9405	0.9761	0	1.6131	0	0	0	0.3704	0.9945	0	0	0	1.3877	0	2.3088	0	0	4.0223
19 pcw	0.4154	1.4913	0	0	0	0	0	0	0	0.9789	0	1.5427	0	0	0	1.6618	0	0	0	0	1.444	0	1.8655	0	0	0
21 pcw_1	0	0	0.1823	0	0	0	0	0	0.3392	0	0	0.8554	0	0	1.0737	1.5362	0.4724	0	0	0	1.0699	0	0	0	0	4.5618
21 pcw_2	0	0	0	0		0	0	0	0	0	0	0	0.8927	0	0	0		0	0	0	0	0	0	0	0	4.5774
24 pcw	0.7138	2.5023	0	0.7193	1.5258	0	0	0.6345	0	1.4053	0	0.165	2.6526	0	0	2.8636	0	0	0	0	1.0086	0	2.5699	0	0	4.1623
25 pcw	0	0	0	0	0	0	0	0	0	1.9596	0	0	0	0	0	0	0	0	0	0	0	0	0	0	0	0
26 pcw	0	0.469	0	0	0	0	0	0	0	0	0	0.5371	0	0	0.9462	0	0	0	0	0	0	0	0	0	0	0
35 pcw	0	0	0	0	0	0	0	0	0	0	0	0	0	0	0	0	0	0	0	0	0	0	0	0	0	0
37 pcw	1.0211	1.7879	1.1	0.5561	0.1602	0	0	1.7622	0.2479	1.4948	0	0.9409	1.7254	0	0.6953	1.5111	1.0365	0	0	0	0	0	0	0	0	3.7694
4 mos_1	0	0	0	0	0	0	0	0	0	0	0	4.3534	3.9961	0	3.062	2.6428	2.3966	0	0	0	2.2199	0	3.1455	0	0	4.0965
4 mos_2	0.085	2.6437	3.628	0.5944	1.0937	0	0	2.1802	2.7484	1.5234	0	0	2.0796	0	2.5839	0	0	0	0	0	2.5604	0	2.5342	0	0	3.7299
4 mos_3	3.291	2.9342	2.6252	0.8584	1.5266	0	0	0	0	2.1714	0	2.38	2.9644	0	0	0	1.1712	0	0	0	0	0	0	0	0	0
10 mos	0.9751	0	1.7836	2.3158		0	0	2.2057	1.8851	0	0	1.745	1.8947	0	1.9721	0	0	0	0	0	0	0	2.5894	0	0	2.3676
1 yrs	3.0076	0.5103	2.8682	2.9677	3.0161	0	0	3.1915	3.539	2.8142	0	2.7929	2.9098	0	2.9753	2.7475	2.0777	0	0	0	2.1251	0	3.4595	0	0	4.3352
2 yrs	0	0	0	0		0	0	1.0989	0	0	0	0	0	0	0	0	0	0	0	0	0	0	0	0	0	0
3 yrs_1	0	0.2546	0	0.3113	0.8352	0	0	0.9599	1.0201	0	0	0.4898	0	0	0	0	0	0	0	0	0	0	0.347	0	0	1.7085
3 yrs_2	0	0	0	0	0	0	0	0	0.6971	0.9365	0	0	1.9596	0	0.9462	0	0	0	0	0	0	0	0	0	0	3.4827
4 yrs	0.5381	2.0538	0	0	0	0	0	0	0	0	0	1.2157	0	0	0	0	0.713	0	0	0	0.8315	0	2.6531	0	0	3.3765
8 yrs_1	2.6169	2.8315	2.2673	2.7942	1.7988	0	0	0.7211	1.2653	0.4407	0	1.4196	1.4369	0	2.2283	3.5067	1.0211	0	0	0	1.2631	0	1.7679	0	0	2.9853
8 yrs_2	3.5884	0.8956	3.5696	0	0	0	0	0	2.8816	3.4262	0	3.291	3.7947	0	4.6418	0.9415	0.3253	0	0	0	0	0	0	0	0	4.8685
11 yrs	0.2549	2.3183	0.2724	1.3265	1.174	0	0	1.1165	1.1044	1.3221	0	0.6045	0	0	2.3133	0	0.2809	0	0	0	0	0	0	0	0	1.7689
13 yrs	1.652	0.6413	1.9558	0.7908	1.4197	0	0	0.1945	0.8034	1.8203	0	1.4173	1.279	0	0.5034	0.5458	2.5846	0	0	0	0	0	1.3627	0	0	2.1986
15 yrs	0	0	0	0	0	0	0	0	2.4695	0	0	2.6021	1.782	0	0	0	0.9383	0	0	0	0	0	0	0	0	4.0212
18 yrs	1.5379	1.9301	0	0.7938	0	0	0	0.9138	0.9263	0	0	0	0.5407	0	0.9669	1.0776	0	0	0	0	0	0	0	0	0	1.1578
19 yrs	2.3268	1.4208	1.8825	2.6605	1.3526	0	0	0.9037	1.9496	2.3667	0	2.2161	1.2824	0	1.8579	1.7841	1.833	0	0	0	1.6431	0	2.4422	0	0	3.7998
21 yrs	2.6983	1.6244	0.6815	3.0598	0.9976	0	0	1.7948	1.2913	2.3077	0	0.9058	0.5579	0	2.0655	1.3339	1.5483	0	0	0	2.0586	0	3.4575	0	0	3.4247
23 yrs	0	0	0.5421	1.6685	1.6837	0	0	1.7876	1.4569	2.0477	0	1.8506	1.5378	0	0	1.1149	0.8668	0	0	0	0.881	0	1.5063	0	0	2.7008
30 yrs	1.6256	0.8778	2.2932	0	1.4742	0	0	1.4997	1.5952	1.1996	0	1.2859	1.1828	0	0.9988	3.8515	0	0	0	0	1.4089	0	1.8282	0	0	4.0184
36 yrs	1.4304	2.3928	1.8906	1.2578	1.8146	0	0	1.3312	2.1753	1.7753	0	2.4264	2.3722	0	1.5916	1.7093	1.5604	0	0	0	1.5593	0	2.1275	0	0	1.5561
37 yrs	0	1.4751	1.7971	2.0928	2.4838	0	0	1.0291	1.5274	2.0918	0	2.5251	1.7803	0	2.1499	2.6574	1.7729	0	0	0	0.7183	0	2.0855	0	0	2.2978
40 yrs	1.2923	1.3103	0	1.1567	1.9426	0	0	0	1.3742	1.5237	0	1.8817	0.9467	0	1.284	0.5399	0.1486	0	0	0	0.7088	0	2.4876	0	0	0
