# Supplementary material for: Functional implications of the exon 9 splice insert in GluK1 kainate receptors
Source: eLife. 2024 Nov 6;12:RP89755. doi: 10.7554/eLife.89755 (PMC11540303; doi:10.7554/eLife.89755)
Supplement: Figure 2—figure supplement 1—source data 1. [file elife-89755-fig2-figsupp1-data1.xlsx]

## Sheet: Figure 2-figure supplement 1
GluK1-1a
Kainate Dose Response			% Maximal current
Log [M]	Concentration [M]	Concentration [µM]	Cell 3	Cell 4	Cell 5	Cell 6	Cell 8	Cell 9	Mean	STDEV	SEM
-6.30103	5e-07	0.5	0	0	0	0	0	0	0	0	0
-5.30103	5e-06	5	8.2	11.1	9.7	13.4	20.75	9.1	12.0417	4.63599	1.89264
-5	1e-05	10	20.1	19.2	21.7	19.3	30.8	15.1	21.0333	5.25877	2.14688
-4.60206	2.5e-05	25	43.6	41.9	54.3	37.6	47.3	38.4	43.85	6.22471	2.54123
-4.30103	5e-05	50	73.1	67.8	77.3	63.4	83.2	61.7	71.0833	8.33533	3.40288
-4	0.0001	100	90	91.7	94.7	85.7	96.7	80.1	89.8167	6.10194	2.49111	N	6
-3.52288	0.0003	300	100	100	100	100	100	100	100	0	0	EC50	26.8 ±6.2 μM
-3.22185	0.0006	600	83	87.1	88.4	92.6	86	72.2	84.8833	6.96403	2.84305	Hill's slope	1.4
GluK1-2a
Kainate Dose Response			% Maximal current
Log [M]	Concentration [M]	Concentration [µM]	Cell 1	Cell 2	Cell 4	Mean	SEM
-6	1e-06	1	0	0	0	0	0
-5.30103	5e-06	5	13	11	21	15	3.05505
-5	1e-05	10	26	23	22	23.6667	1.20185
-4.60206	2.5e-05	25	62	50	46	52.6667	4.8074
-4.30103	5e-05	50	93	77	75	81.6667	5.696
-4	0.0001	100	99	96	89	94.6667	2.96273	N	3
-3.52288	0.0003	300	100	100	100	100	0	EC50	21 ± 9.1 μM
-3.30103	0.0005	500	83	94	64	80.3333	8.76229	Hill's slope	1.5
Raw trace figures
GluK1-1a										GluK1-2a
Time (ms)	0.5 μM	5 μM	10 μM	25 μM	50 μM	100 μM	300 μM	600 μM		Time (ms)	1 μM	5 μM	10 μM	25 μM	50 μM	100 μM	300 μM	500 μM
0	-0.00272	-0.000506	0.00246	0.00208	-0.0032	-0.000501	0.00407	0.000425		0	0.00147	0.00604	-0.00365	-0.00127	0.00032	0.00516	-0.00071	0.00537
0.1	-0.00864	0.000679	-0.00347	0.00267	-0.00735	9.17e-05	0.00407	0.000425		0.1	-0.00445	0.00308	-0.00424	-0.000678	0.00269	-0.00254	0.00166	-0.0053
0.2	-0.01101	-0.00761	0.00186	0.00148	0.00213	-0.00346	0.0017	-0.00431		0.2	-0.00445	0.00722	0.00642	-8.57e-05	-0.00205	-0.00906	-0.00367	-0.000557
0.3	-0.00391	8.64e-05	0.00186	0.00208	-0.00438	0.00246	0.0017	-0.00194		0.3	-0.000304	0.00248	-0.00424	-0.000678	0.01394	0.00516	-0.00308	0.00833
0.4	0.00202	-0.00702	0.00364	0.00504	-0.00735	-0.00169	0.00467	-0.000168		0.4	0.000288	0.0013	-0.00779	0.00821	0.0021	0.00753	0.00877	-0.00174
0.5	-0.00805	-0.000506	0.0066	-0.00266	0.000948	-0.00228	0.00526	-0.00135		0.5	0.00325	0.00367	-9.35e-05	-0.00246	0.0021	-0.00136	-0.00545	-0.00589
0.6	-0.00687	0.00186	0.00186	0.00504	-0.00972	0.00542	0.0023	-0.00254		0.6	-0.000304	0.000706	-0.00483	0.00347	0.000913	-0.000765	-0.00486	0.00359
0.7	-0.00509	-0.00702	0.00127	0.00208	-0.00201	-0.000501	0.0023	0.00398		0.7	-0.00208	0.00308	-9.35e-05	0.00643	0.00151	0.00753	-0.00071	0.00181
0.8	-0.00154	-0.00584	0.00601	-0.00385	-0.00201	0.00187	0.00585	-0.00254		0.8	-0.00208	-0.0064	0.0082	0.0088	0.00565	-0.00136	-0.00486	0.00537
0.9	-0.00628	-0.00821	0.00246	0.00148	0.00332	0.00542	0.00763	-0.0055		0.9	0.00325	-0.00759	-0.00365	-0.00246	-0.00323	-0.00432	0.00225	0.003
1	-0.00154	-0.0011	8.7e-05	0.00208	-0.00142	-0.00287	0.00052	0.00102		1	-0.000897	0.00841	0.00287	-0.00364	0.00565	-0.00136	0.00107	-0.0053
1.1	-0.00331	-0.000506	8.7e-05	0.00445	-0.00379	0.00128	0.00052	-0.00135		1.1	-0.00149	0.000706	-0.00306	0.0011	0.0021	-0.00787	-0.00426	-0.00115
1.2	-0.00746	-0.00169	0.00186	0.00504	-0.00083	-0.00524	0.00526	-0.0055		1.2	-0.000304	0.00189	-0.00424	0.0011	0.0021	0.01286	-0.000117	0.00122
1.3	-0.00509	-0.00406	-0.00287	-0.00148	-0.000237	-0.00169	0.0017	0.00339		1.3	-0.00208	-0.000479	0.00228	0.01058	-0.0056	0.0016	0.00344	-0.00293
1.4	0.00261	-0.00406	0.00423	0.000299	-0.0032	-0.00109	0.00348	-0.00313		1.4	-0.00445	0.00248	0.00642	-0.00186	-0.000864	0.00516	-0.00367	0.003
1.5	-0.00154	0.00246	0.00542	-0.00385	-0.00675	0.00128	-0.00126	-0.00076		1.5	0.00088	0.00367	-0.00424	-0.00364	0.01394	-0.00195	0.000475	-0.00115
1.6	0.000241	-0.00288	-0.00406	0.00859	0.0045	0.00246	0.00763	-0.00076		1.6	0.00503	0.00308	-9.35e-05	0.00939	0.00387	-0.00787	0.00403	-0.00293
1.7	-0.00628	-0.00643	0.000679	-0.00266	-0.00794	-0.00524	0.00467	-0.00135		1.7	-0.00504	0.00544	0.00405	0.00465	-0.00916	0.00042	-0.0013	0.0024
1.8	-0.00154	-0.00288	-0.0011	-0.00148	-0.00735	-0.00346	0.0023	-0.00135		1.8	-0.00445	0.0013	-0.000686	-0.000678	-0.00205	-0.00254	-0.00663	-0.00352
1.9	-0.00213	-0.0011	8.7e-05	0.00445	0.00509	-0.00346	0.00585	0.00457		1.9	0.00384	0.00367	0.00405	-8.57e-05	0.01098	0.00279	-0.00426	-0.00233
2	0.0032	-0.00406	0.00246	0.000892	-0.00972	-0.00228	-0.00126	-0.00194		2	0.00147	-0.00107	-9.35e-05	-0.00186	0.00387	-0.0061	-0.00545	-0.0053
2.1	-0.00924	-0.0011	-0.00287	0.000299	0.00154	-0.00228	0.00822	-0.00372		2.1	-0.000304	-0.00403	-0.01016	0.00288	0.00387	0.00397	-0.000117	-0.00233
2.2	-0.000944	0.000679	0.00305	0.000892	-0.00201	-0.00228	-0.00126	-0.00194		2.2	0.00207	0.000706	0.00524	-0.00482	0.00506	0.00279	-0.00071	0.0024
2.3	0.00143	-0.00288	0.00186	0.00326	0.000355	-0.00228	0.00704	0.00161		2.3	0.00325	0.00308	0.00168	-0.00305	-0.00738	-0.0055	0.0064	-0.00233
2.4	-0.0045	8.64e-05	0.00246	-0.000293	-0.00675	0.00128	0.00111	-0.00313		2.4	0.00621	0.00189	-0.00187	0.00939	-0.00501	0.00042	0.00344	-0.0053
2.5	-0.00331	-0.00524	8.7e-05	0.00622	-0.00794	-0.00405	0.0017	0.00398		2.5	0.00325	0.00485	-0.01135	0.00643	0.00387	0.00279	-0.00545	0.00477
2.6	0.000833	-0.00524	0.000679	0.000892	-0.00379	-0.000501	0.00526	0.00339		2.6	0.01214	-0.00759	0.00701	0.00169	-0.00205	0.00871	-0.00249	0.00655
2.7	0.00498	-0.0011	0.00423	0.00267	0.000355	-0.00346	0.00467	-0.0055		2.7	-0.00445	-0.00285	0.00346	0.00347	0.00624	-0.00432	0.00581	-0.00293
2.8	0.00143	-0.00406	0.00423	0.00385	-0.00379	-0.000501	0.0017	0.0022		2.8	0.00088	0.00426	-0.00306	-0.00186	0.00802	0.0022	-0.0096	0.003
2.9	-0.00509	8.64e-05	-0.0011	0.00267	0.00332	-0.00228	-0.00185	0.00339		2.9	0.000288	0.00248	0.00761	0.00702	0.00684	-0.00669	-0.00308	0.00359
3	-0.00213	0.00186	0.00127	0.00208	-0.00616	0.00305	0.00348	-0.00076		3	0.00147	-0.00877	0.00168	0.00169	0.000913	-0.00254	0.00225	-0.0053
3.1	0.00143	0.00305	0.00305	-0.000885	-0.00675	-0.00169	0.00585	-0.00135		3.1	-0.000304	0.00367	-0.00246	0.00347	0.00861	0.00516	-0.00189	-0.00115
3.2	-0.0045	8.64e-05	0.00246	0.00148	0.00213	-0.00583	0.00585	0.000425		3.2	0.00503	0.009	0.00465	-0.01075	-0.0056	-0.00432	-0.00723	3.53e-05
3.3	-0.00154	8.64e-05	0.00186	-0.00148	0.00154	-0.00405	0.00407	0.00102		3.3	0.00325	-0.000479	-0.000686	0.00406	-0.00323	-0.00195	-0.0013	0.00359
3.4	0.00261	-0.00465	0.00305	-0.00444	0.000948	-0.00346	0.00585	-0.0055		3.4	-0.00208	-0.00226	0.000499	0.00406	0.00447	-0.00491	0.00521	-0.00885
3.5	0.00557	-0.00169	8.7e-05	0.00385	-0.00379	0.00246	0.00822	0.00931		3.5	-0.00445	-0.00344	-0.00246	0.00169	0.00328	-0.00432	-0.0013	0.00122
3.6	-0.00272	0.00483	0.00127	0.00267	-0.00142	0.000684	-0.00422	0.00339		3.6	-0.00327	0.00544	0.00583	-8.57e-05	0.000913	0.00042	-0.0013	0.00418
3.7	-0.00746	0.000679	0.0066	-0.000293	-0.00201	0.00246	0.0017	-0.00254		3.7	-0.00919	0.00248	0.00405	0.00702	-0.00383	0.00042	-0.000117	0.000628
3.8	-0.00391	0.00601	0.00423	0.000892	-0.00142	0.00305	-0.00244	-0.00254		3.8	0.00443	-0.000479	-0.00542	0.00228	0.00802	-0.0055	-0.00071	-0.00944
3.9	-0.00331	-0.00406	0.00127	0.00148	0.00391	-0.000501	0.00052	-0.00135		3.9	0.00266	0.00367	-0.00661	-0.00482	0.000913	0.0022	0.00166	0.00359
4	-0.00154	-0.00169	8.7e-05	-0.000293	-0.00379	0.000684	0.00467	-0.00491		4	-0.00327	-0.00403	0.000499	0.00465	0.00684	-0.00254	0.00107	-0.00115
4.1	0.00143	-0.00169	0.00601	0.00208	-0.000237	-0.000501	-0.00126	-0.00076		4.1	-0.00386	0.009	-9.35e-05	0.00406	-0.00679	0.00634	0.00284	-0.00648
4.2	0.00143	-0.00228	-0.0011	0.00208	-0.00261	9.17e-05	0.00585	0.000425		4.2	-0.00267	0.00367	0.00642	-0.00423	-0.01093	-0.00432	-0.00071	-0.00233
4.3	-0.000352	-0.00288	0.00186	-0.00325	0.000355	-0.00228	0.00585	-0.00372		4.3	0.00503	-0.00285	0.00701	0.00584	0.01039	0.00279	-0.00367	0.000628
4.4	-0.000352	0.00601	0.00186	-0.00148	0.00213	-0.00346	0.00348	-0.000168		4.4	-0.00564	0.00189	-0.00187	0.00821	0.01217	-0.00313	-0.00249	-0.00115
4.5	-0.000944	-0.000506	0.000679	0.000299	0.00272	-0.00287	0.00467	0.00161		4.5	-0.00327	-0.00107	0.00109	-8.57e-05	-0.00383	0.00279	-0.00723	-0.00115
4.6	0.00261	-0.00169	-0.0011	0.000299	-0.00201	-0.00346	-7.27e-05	0.000425		4.6	0.000288	0.000113	0.00465	-0.00423	-0.00738	0.00042	0.00344	0.003
4.7	0.00202	8.64e-05	0.00186	-0.00148	0.00391	-0.00109	0.0023	-0.00194		4.7	0.00266	0.00485	-0.000686	0.00643	0.01098	0.00516	-0.00426	0.00359
4.8	-0.00154	8.64e-05	0.00127	0.000892	-0.00201	-0.00169	0.00467	-0.00135		4.8	0.00266	0.00604	0.00583	0.00169	0.00506	-0.0055	-0.00604	-0.0053
4.9	0.00261	0.000679	-0.00287	-0.000293	0.00272	-0.00228	-0.00185	0.00339		4.9	-0.00445	0.00189	0.00109	-8.57e-05	-0.00205	-0.0061	-0.00071	0.00596
5	0.00498	0.00364	0.00483	0.000299	0.0045	0.00305	-7.27e-05	-0.00194		5	-0.00741	-0.0064	0.00642	-0.00305	-0.00323	-0.00136	-0.00486	3.53e-05
5.1	0.00616	0.000679	0.0066	0.000892	-0.00083	0.000684	-0.00126	-0.000168		5.1	0.00147	0.01078	-9.35e-05	-8.57e-05	-0.00264	0.00397	0.000475	-0.0053
5.2	0.00557	0.00423	8.7e-05	0.00859	-0.00201	-0.00169	-0.00303	0.00161		5.2	-0.00327	0.000113	0.0082	0.00762	-0.0056	-0.00136	-0.00663	-0.00648
5.3	0.00202	-0.00584	-0.00821	-0.00385	0.00391	-0.00228	-0.00185	0.00161		5.3	0.0068	0.000113	0.000499	-0.00364	-0.00442	0.00042	0.00581	0.0024
5.4	-0.00272	-0.00169	0.00127	-0.00207	-0.00142	-0.00287	0.00407	-0.00135		5.4	0.01154	-0.00166	0.00287	0.00228	0.0098	-0.000173	-0.00071	-0.00115
5.5	0.00616	0.00542	0.01371	-0.000885	-0.00912	-0.00287	0.0017	-0.000168		5.5	0.00207	-0.01351	-0.000686	0.00347	0.00565	-0.000173	-0.00367	0.003
5.6	0.000833	0.00186	-0.00287	-0.000293	0.00154	-0.00228	0.00644	-0.00254		5.6	0.00562	-0.000479	0.00168	0.000507	-0.000864	-0.00432	-0.00426	0.003
5.7	0.000241	-0.00288	-0.00287	0.00267	-0.00201	-0.00109	-7.27e-05	0.00576		5.7	-0.000897	0.00722	0.00524	0.0011	-0.00383	-0.0055	-0.00545	-0.000557
5.8	-0.0045	0.00305	0.00838	0.00682	0.00391	-0.00346	-0.000665	-0.00076		5.8	-0.000897	0.00663	-0.00542	-0.00186	0.00565	0.0022	0.00462	-0.00589
5.9	0.00557	0.00127	0.00305	-0.00503	-0.00142	-0.00109	0.00585	0.00161		5.9	0.00621	0.00367	0.00938	0.00525	0.00269	0.00042	0.00403	-0.00589
6	0.00261	0.00186	-0.00287	0.000299	-0.00201	0.00128	0.0017	0.000425		6	0.0068	0.0013	-9.35e-05	0.00465	0.00861	0.0022	-0.00545	0.00477
6.1	0.0032	-0.00643	-0.00584	0.00504	0.0045	-0.00346	0.00407	0.0022		6.1	-0.0086	-0.00936	-0.00187	0.00228	-0.00264	-0.00491	-0.00426	0.00418
6.2	0.00143	-0.00228	0.00364	0.00208	0.000948	-0.00169	0.00881	0.00457		6.2	-0.000897	-0.00522	0.00287	-0.01312	0.00032	-0.01024	0.00284	0.00833
6.3	0.0032	0.0066	0.00246	-0.00148	-0.00201	-0.00228	0.00111	-0.00076		6.3	0.00562	0.00189	-0.00602	-0.00305	0.00269	-0.000765	-0.00426	0.00596
6.4	0.00616	0.00127	0.00305	0.000892	-0.00498	0.00542	-0.00185	-0.00135		6.4	-0.00623	0.00426	0.00583	0.0088	-0.00442	-0.00432	-0.00604	-0.00589
6.5	0.00616	-0.00584	0.00305	-0.00207	0.00213	-0.00228	-0.00363	0.00694		6.5	-0.00623	0.00189	0.00168	-0.00127	-0.00383	0.00101	-0.00189	-0.00233
6.6	0.0032	0.00305	0.00186	-0.00325	0.00213	-0.00761	0.00644	0.00635		6.6	0.00977	-0.00107	-0.01727	-0.00186	-0.000272	0.0016	0.00107	-0.00589
6.7	0.000833	0.00483	0.000679	0.000299	0.0045	0.00305	0.0017	0.00161		6.7	-0.00267	0.000706	0.00287	-0.00186	0.00506	0.00753	0.00225	-0.00589
6.8	-0.0045	-0.000506	-0.00465	-0.00325	0.00391	-0.00169	0.00348	0.00457		6.8	-0.000897	0.0013	0.00583	0.00762	-0.000864	-0.01084	-0.00071	-0.0053
6.9	0.00143	0.00186	-0.00347	0.000299	0.000948	-0.00583	0.00407	0.00398		6.9	-0.00267	0.00189	0.00287	0.00347	-0.000272	-0.00432	0.00462	0.00418
7	0.00498	0.00246	-0.00169	-0.00266	0.00746	-0.00109	0.00111	-0.00194		7	-0.00149	0.00308	-0.00365	-8.57e-05	-0.00738	0.00279	0.00818	0.000628
7.1	0.000241	-0.00465	0.0072	0.00445	-0.00201	-0.00109	0.0017	-0.00076		7.1	-0.000304	0.00367	0.00346	-0.00601	-0.00442	-0.00195	-0.00723	-0.00115
7.2	0.000833	0.00305	-0.00228	0.00445	-0.000237	-0.00405	0.00467	-0.00313		7.2	0.00147	0.00426	0.00465	-0.00423	-0.00146	0.00042	-0.00486	-0.00233
7.3	0.00498	-0.00169	0.00127	-0.00266	-0.000237	-0.00465	-0.00244	-0.0055		7.3	-0.00208	0.00189	-0.000686	0.00702	-0.000272	-0.00669	0.00284	-0.00115
7.4	0.0038	-0.00288	0.01016	0.00267	-0.00201	9.17e-05	0.0023	-0.000168		7.4	0.00562	-0.00403	-0.00246	0.00584	-0.00323	-0.0061	-0.0013	0.000628
7.5	0.00616	-0.000506	-0.00465	-0.00622	-0.00142	-0.00109	-0.000665	0.00635		7.5	-0.000304	0.00959	0.000499	-0.00364	-0.00205	-0.000173	-0.00604	-0.00115
7.6	-0.00272	-0.00465	0.000679	0.00741	0.00272	0.000684	0.00704	0.0022		7.6	-0.00267	-0.000479	-0.00483	-0.00542	0.00151	0.00575	0.00166	-0.00115
7.7	0.000241	0.0066	0.0072	-0.00562	0.000355	-0.000501	-0.00659	-0.00076		7.7	0.000288	0.00308	0.00465	-0.00186	0.00269	0.00338	-0.0013	-0.00411
7.8	-0.000944	8.64e-05	-0.0011	-0.00148	0.00509	-0.00346	-7.27e-05	0.00161		7.8	0.0074	-0.00522	-0.000686	-0.00719	-0.00205	-0.00906	-0.00249	0.00418
7.9	-0.000352	-0.00939	-0.00228	-0.00266	-0.000237	0.00187	0.00467	0.00457		7.9	-0.00919	-0.00818	-0.00187	0.00465	-0.0062	-0.00728	-0.000117	0.00418
8	0.00439	8.64e-05	0.00305	-0.00325	0.00154	-0.00169	0.00348	0.00161		8	-0.00623	0.00544	0.0082	0.00169	-0.0056	0.00101	-0.000117	-0.0053
8.1	-0.0045	0.00186	-0.0011	0.008	0.00213	0.000684	0.00289	-0.00313		8.1	0.00503	0.000706	0.000499	-0.00482	0.00387	0.0022	0.00225	3.53e-05
8.2	-0.000352	-0.00524	0.000679	-0.00503	-0.00142	-0.00109	0.00111	0.00102		8.2	0.00207	0.0013	0.00228	-0.00186	-0.00264	0.00101	-0.00426	-0.0047
8.3	-0.00213	-0.00406	8.7e-05	-0.00385	0.00569	0.00483	-0.000665	0.00516		8.3	0.00443	0.00959	-0.01135	0.00406	0.00387	-0.0061	-0.00249	-0.00767
8.4	0.000241	0.0066	0.000679	-0.00207	-0.000237	-0.00169	-0.00303	0.00872		8.4	-0.0086	-0.000479	0.00346	-0.00186	-0.00323	-0.0061	0.00462	0.000628
8.5	-0.00391	0.00246	8.7e-05	-0.00207	0.000948	-0.00642	0.00289	-0.00491		8.5	0.00266	0.00367	0.00109	0.00643	-0.000864	-0.00432	-0.000117	0.00359
8.6	0.000241	-0.00584	8.7e-05	-0.000885	0.00509	0.00246	0.00585	0.00635		8.6	0.00503	0.00308	-0.00128	-0.00601	0.0021	0.00042	-0.00367	-0.00115
8.7	0.00261	0.00186	-0.0011	-0.00207	0.000355	-0.00405	0.00289	0.00813		8.7	0.000288	-0.00344	-0.00306	0.00288	-0.00442	-0.00313	-0.00189	0.00359
8.8	0.00143	-0.00288	0.00305	-0.0074	-0.00201	-0.00228	-0.0054	-0.000168		8.8	0.00325	0.00248	0.00346	-0.000678	0.0021	0.00042	0.00462	-0.000557
8.9	0.00616	-0.00288	0.000679	-0.000885	-0.00498	-0.00346	0.00526	0.0022		8.9	-0.00682	0.00841	0.00642	0.00643	-0.00146	0.00397	0.00758	-0.0047
9	0.00498	-0.00643	-0.00347	-0.00266	0.00213	0.00365	-0.00185	0.00635		9	-0.00386	-0.00403	0.00346	0.00465	-0.0056	-0.00136	-0.00841	0.000628
9.1	0.00439	8.64e-05	0.00483	-0.000293	-0.000237	0.000684	0.00052	-0.00135		9.1	-0.01037	-0.00463	0.00109	-0.00186	-0.00323	-0.00195	-0.00367	-0.00174
9.2	-0.00391	-0.00465	-0.00347	-0.00325	0.000355	0.00365	-0.0054	0.00398		9.2	0.00858	-0.00403	0.000499	-0.00364	0.00447	-0.00313	0.00107	-0.00174
9.3	0.00143	-0.000506	-0.00287	-0.00977	-0.00083	-0.00405	-0.00126	0.00635		9.3	0.00207	0.00248	0.000499	0.0011	-0.00146	-0.000173	0.00107	0.00359
9.4	-0.000352	0.00246	0.00305	0.000299	0.00154	-0.00346	0.00052	0.00161		9.4	-0.00564	0.00367	-0.00128	-0.000678	-0.000864	0.00338	0.00107	0.00122
9.5	-0.00213	0.00246	-0.00584	-0.00207	0.000948	-0.00228	0.00644	0.00279		9.5	-0.00327	-0.000479	0.00642	-0.00305	0.00328	-0.00728	-0.00189	-0.0053
9.6	0.000241	-0.00169	0.00186	-0.00681	-0.00201	-0.00109	0.00289	0.00339		9.6	-0.00682	-0.00403	-0.00424	0.00584	0.00624	-0.00313	0.00699	-0.0047
9.7	-0.000944	-0.00998	0.00127	0.000299	0.00154	-0.00346	-0.00126	0.00398		9.7	0.01095	0.000706	0.00524	-0.0066	0.00743	-0.00373	-0.00189	-0.00293
9.8	0.00202	0.00246	0.00246	-0.00148	-0.00083	0.000684	-0.00185	-0.00135		9.8	0.00799	-0.00463	-9.35e-05	-0.00601	-0.000272	0.00101	-0.00189	0.00537
9.9	-0.0045	0.00364	8.7e-05	0.00385	-0.000237	0.00483	-7.27e-05	-0.00076		9.9	-0.00682	-0.00344	0.00524	0.00288	-0.000864	0.00634	0.00344	0.0024
10	0.00261	-0.01117	0.00483	-0.00503	0.00509	-0.00405	0.00526	0.00398		10	-0.01452	0.00604	0.00287	0.00347	-0.00857	0.00101	-0.00189	-0.00707
10.1	-0.000352	-0.00347	-0.00584	-0.000885	0.000355	-0.000501	-7.27e-05	-0.00431		10.1	-0.000304	-0.00226	-0.00187	-0.00186	-0.00738	-0.00906	0.000475	-0.00885
10.2	-0.000352	0.00127	-0.000505	0.00267	-0.00142	0.000684	0.00111	0.00279		10.2	-0.00564	-0.000479	-0.00424	0.00228	0.00151	0.0022	0.00403	0.000628
10.3	-0.0045	-0.000506	0.00186	-0.00503	-0.00201	0.00661	0.0017	0.00161		10.3	-0.00623	-0.00581	0.00346	-0.00127	-0.00679	0.00575	0.00403	0.00477
10.4	-0.00331	-0.000506	-0.00228	-0.00385	0.00509	-0.00642	-0.00185	0.00279		10.4	0.00384	0.01255	0.00524	-0.00305	-0.0056	0.00042	-0.0096	0.00418
10.5	-0.00272	0.00127	-0.0011	-0.000885	-0.00142	0.00246	-0.00303	-0.000168		10.5	-0.00978	0.0013	-0.00187	0.000507	-0.00323	-0.00313	-0.000117	0.000628
10.6	0.0032	-0.00406	-0.00406	-0.00385	0.00687	0.000684	0.00407	0.00102		10.6	-0.00623	-0.00107	-0.00542	-0.00956	-0.000864	0.00042	0.00581	-0.00293
10.7	-0.0045	-0.00406	-0.00228	-0.00444	-0.000237	-0.00702	-0.00896	-0.00076		10.7	0.00266	-0.00403	-0.00365	0.00525	-0.000272	-0.00254	-0.00723	-0.00352
10.8	0.000241	8.64e-05	-0.00761	0.00267	-0.0032	-0.00109	0.00052	0.00161		10.8	0.00266	-0.00285	0.00465	-0.00186	0.0021	0.00042	0.00166	0.003
10.9	-0.00272	-0.0011	0.00186	0.00445	-0.000237	0.00483	-0.00185	0.000425		10.9	-0.00623	0.000706	0.00583	-0.00246	-0.0062	0.0022	0.00166	0.000628
11	0.00735	-0.00288	-0.00347	-0.00266	0.000355	-0.00228	0.0017	-0.00135		11	-0.00682	-0.00581	-0.00424	-8.57e-05	-0.00323	-0.000765	0.00403	-0.00115
11.1	-0.0045	-0.00702	-0.000505	-0.00266	-0.00972	-0.00109	-0.00185	0.000425		11.1	-0.00386	-0.00285	0.00228	0.00169	0.00032	0.00338	0.00166	0.0107
11.2	-0.00391	8.64e-05	0.00246	-0.00207	-0.0032	-0.00524	0.00704	0.00576		11.2	-0.00267	0.0013	0.00642	-0.00305	0.00032	0.0022	-0.00367	0.000628
11.3	-0.000944	-0.00406	-0.00702	-0.00266	-0.00083	-0.00109	-0.000665	0.00398		11.3	-0.000304	0.00308	-0.00602	-0.00305	-0.00797	-0.00432	0.0064	-0.00352
11.4	-0.00391	-0.00169	0.0072	-0.00148	-0.00083	0.00602	-0.00244	0.000425		11.4	-0.00386	0.00189	-0.00424	0.00347	-0.000272	0.00931	0.00521	-0.00174
11.5	0.0038	0.000679	0.00423	-0.00266	-0.00557	-0.00109	0.00111	-0.000168		11.5	-0.00801	0.00663	-0.00187	0.00169	-0.00383	0.00516	-0.0013	-0.00411
11.6	-0.00391	-0.00406	-0.00169	-0.00444	0.000948	0.00365	0.0017	-0.00076		11.6	0.000288	-0.00107	0.00761	0.00169	-0.00501	-0.0055	0.00225	-0.00352
11.7	-0.00924	-0.00288	-0.00465	-0.000885	-0.00261	-0.00169	-0.000665	0.00398		11.7	-0.000897	-0.000479	0.00109	-0.0066	0.00506	-0.00906	0.00225	0.00774
11.8	0.000241	8.64e-05	-0.000505	-0.000885	-0.00438	-0.00642	-0.00481	-0.00135		11.8	-0.00149	-0.00522	0.00524	-8.57e-05	-0.00442	0.00279	0.00166	0.00122
11.9	-0.00509	-0.000506	-0.00465	-0.00266	-0.00261	0.00305	-0.00244	0.00753		11.9	0.00088	-0.00877	-0.000686	-0.000678	-0.00205	-0.00195	-0.00545	-0.00885
12	-0.000352	-0.00643	0.00186	0.00148	-0.00261	0.00246	0.00407	-0.00372		12	-0.01452	0.0013	-0.00602	-0.000678	0.00447	-0.00491	0.00403	-0.00411
12.1	-0.00154	8.64e-05	-0.00702	-0.00562	0.0045	-0.00287	0.0023	-0.000168		12.1	-0.00741	0.00367	0.00109	0.00702	-0.000272	0.00575	-0.00367	0.00951
12.2	-0.0122	8.64e-05	0.000679	0.00445	-0.00083	0.00542	-0.00422	-0.000168		12.2	-0.01215	0.0013	0.00642	0.00347	-0.00146	0.00694	0.00344	0.00596
12.3	-0.0045	-0.00584	0.000679	-0.00207	-0.0032	-0.00287	0.0017	0.00398		12.3	-0.000897	-0.0064	-0.00246	-8.57e-05	0.0021	-0.000765	0.00462	0.003
12.4	0.000833	-0.00406	-0.00287	-0.00325	-0.00261	0.00128	-0.00363	0.00161		12.4	0.00562	-0.00403	0.00109	-0.00482	0.00032	0.00042	-0.00249	-0.00767
12.5	-0.00213	0.00423	0.00364	-0.000885	-0.00379	0.00483	0.00052	-0.00135		12.5	-0.00327	-0.00344	-0.00246	-0.00364	-0.000864	0.00516	0.00403	0.00122
12.6	0.00202	-0.00465	-0.0011	-0.00444	-0.00083	0.00365	-0.00955	-0.00194		12.6	-0.01393	-0.00463	0.00228	-8.57e-05	-0.000864	-0.00373	0.00166	0.00418
12.7	0.000241	0.00423	0.000679	0.00208	0.000355	-0.000501	-0.00185	-0.00194		12.7	-0.00682	0.00367	-0.00542	-0.00423	-0.000272	-0.00432	0.00581	-0.00293
12.8	0.000241	-0.00347	-0.00347	0.000892	-0.000237	-0.00346	0.00704	-0.00313		12.8	0.00858	-0.000479	0.000499	0.00643	0.00032	0.00753	0.000475	0.000628
12.9	-0.000352	-0.000506	-0.00228	-0.00918	-0.00379	0.00305	-0.006	0.00102		12.9	0.00207	-0.00463	0.00168	-0.00305	-0.00679	0.00042	-0.0013	0.00418
13	0.00143	-0.00169	-0.0011	0.000892	-0.00498	0.00365	-0.00481	-0.00313		13	-0.00504	0.0013	-0.00779	-0.0066	0.00269	-0.0061	-0.00604	-0.00293
13.1	-0.00154	-0.00169	-0.00406	-0.00503	-0.00083	0.00602	0.00822	0.00279		13.1	-0.00445	-0.00285	0.00168	0.00762	0.00151	0.00101	-0.00426	0.00122
13.2	-0.00509	-0.00702	0.00305	0.00326	0.000355	0.00542	0.00111	0.000425		13.2	0.00266	-0.000479	-9.35e-05	0.00643	-0.0062	0.00457	0.00462	-0.0124
13.3	0.000833	-0.00465	-0.0011	-0.000885	-0.00142	0.00128	-0.000665	0.00161		13.3	-0.00564	0.01018	0.00287	-0.00719	-0.00205	0.0022	0.00344	0.00359
13.4	0.000833	0.00127	-0.00406	0.00445	0.00213	0.00661	0.00289	-0.00668		13.4	-0.00267	-0.000479	-0.00365	0.00347	-0.0056	-0.00373	0.00758	0.003
13.5	0.000833	-0.00821	0.00305	-0.00444	-0.00735	0.000684	-0.00422	-0.00668		13.5	-0.00386	0.000706	-0.00483	0.00169	-0.00205	0.00694	-0.0096	-0.00115
13.6	-0.0045	-0.00821	0.00542	-0.00325	-0.00142	0.00246	-0.00126	-0.00194		13.6	0.00266	-0.000479	0.00583	0.00821	0.0098	0.00042	0.00166	-0.00174
13.7	0.000241	-0.00169	0.000679	-0.00207	-0.00379	-0.000501	0.0023	-0.00372		13.7	-0.00623	0.00604	0.00287	-0.00542	-0.00264	-0.00373	0.00462	0.000628
13.8	-0.000944	-0.00347	-0.00406	0.000892	-0.00794	-0.00642	-0.000665	-0.0055		13.8	-0.01156	0.0013	-0.0072	-0.00186	-0.00501	0.00397	0.00521	-0.00293
13.9	-0.00509	-0.00288	-0.00228	-0.00385	0.00213	0.00542	0.00052	0.00457		13.9	-0.01037	-0.00522	-0.00424	0.0011	-0.00857	-0.000765	-0.00663	3.53e-05
14	-0.00391	-0.0011	8.7e-05	-0.00207	0.00213	-0.00405	-0.00363	0.0022		14	0.00325	-0.00344	0.00405	0.00762	-0.00146	0.00694	-0.000117	0.00477
14.1	-0.00509	-0.00406	-0.00584	-0.00325	-0.0032	-0.00228	-7.27e-05	0.000425		14.1	-0.00682	-0.00877	-0.00128	-0.00542	0.0098	0.00575	0.00225	0.000628
14.2	-0.00864	-0.00465	-0.00406	-0.00385	0.000355	0.000684	-0.00185	-0.00846		14.2	-0.01097	0.00841	0.00168	0.00169	-0.00442	-0.00906	-0.00189	-0.00826
14.3	-0.00154	-0.00406	-0.00465	-0.00385	-0.00498	0.00305	0.00467	-0.00254		14.3	-0.000897	0.00485	-0.00365	0.01176	0.00151	0.0022	0.00344	0.00181
14.4	-0.00568	-0.00347	-0.000505	0.00445	-0.00735	9.17e-05	0.00526	0.00576		14.4	0.000288	-0.00403	0.000499	0.0011	0.0021	-0.00373	-0.00071	0.00122
14.5	-0.000944	-0.000506	0.00423	-0.00207	-0.0032	0.00779	-0.00126	0.00279		14.5	0.00207	-0.000479	0.00761	0.00169	-0.00323	0.0022	0.00758	-0.00411
14.6	-0.00805	-0.0011	0.00246	0.00148	-0.00201	-0.000501	0.00467	-0.00076		14.6	-0.00623	-0.00107	-0.00365	-0.00305	0.00032	0.00397	-0.00249	0.00774
14.7	-0.00568	8.64e-05	0.00483	-0.00325	-0.00261	0.000684	-7.27e-05	0.00279		14.7	-0.00919	-0.00344	-0.00898	-8.57e-05	0.00624	-0.00432	0.00166	0.00359
14.8	-0.00272	0.000679	-0.00761	-0.00444	-0.00557	0.000684	-0.00659	0.000425		14.8	-0.000897	0.00544	0.000499	-0.00482	0.00328	-0.00136	0.00344	-0.00411
14.9	-0.00568	-0.00524	0.00127	-0.00207	-0.00735	0.00424	0.00348	-0.00491		14.9	-0.00741	-0.00285	0.00524	0.00169	0.00861	0.0022	0.00462	0.00537
15	0.00143	-0.00643	0.000679	0.000892	-0.00438	0.00246	-0.00303	-0.01083		15	-0.00208	-0.0064	-0.00246	0.00228	0.00032	0.00279	-0.000117	0.01011
15.1	-0.00391	-0.00584	8.7e-05	-0.00207	-0.00498	0.00483	-0.00126	-0.00905		15.1	-0.00741	0.009	-0.000686	0.0011	-0.00738	-0.00432	-0.000117	-0.00826
15.2	0.0038	-0.000506	-0.00524	0.00504	-0.00498	0.00305	0.00111	-0.00372		15.2	-0.01037	0.00367	-0.00542	0.00643	0.00151	-0.00195	-0.00367	0.00359
15.3	0.00261	0.00127	-0.00584	-0.00562	-0.00557	0.00779	-0.00422	-0.00313		15.3	-0.000304	-0.00226	-0.00128	0.0011	0.00269	0.00338	0.00166	-0.00648
15.4	-0.00154	-0.00288	-0.0011	-0.00503	-0.00912	0.00246	-0.00126	-0.000168		15.4	-0.00741	-0.00285	0.00228	0.01058	0.00387	0.00753	0.00462	0.00359
15.5	-0.00983	-0.00228	-0.0011	-0.00385	-0.00083	-0.00465	-0.00777	-0.00609		15.5	-0.000304	-0.00166	-9.35e-05	0.00228	-0.00679	0.00575	0.00581	0.00774
15.6	-0.000352	-0.00702	0.00186	0.00148	-0.0032	0.00128	-0.000665	-0.00254		15.6	-0.00801	-0.00344	-0.00483	-0.00719	-0.000864	-0.00432	-0.0013	-0.00707
15.7	0.00261	-0.00288	-0.00347	0.00267	-0.00142	0.00424	0.01118	-0.00609		15.7	0.000288	-0.00285	0.000499	-0.00246	-0.00205	0.00516	0.00403	0.00537
15.8	0.00143	-0.00524	-0.00524	0.000299	0.00509	-0.00169	0.00289	-0.00076		15.8	-0.00564	0.0013	-0.00128	0.01176	0.00447	-0.00432	-0.00071	0.00477
15.9	-0.00568	-0.0011	0.00305	-0.00325	-0.00675	0.00602	-0.000665	-0.00194		15.9	-0.00267	-0.0147	-9.35e-05	0.00584	-0.00383	-0.00254	0.00225	0.003
16	-0.00509	-0.00584	0.00364	-0.00622	-0.00083	-0.000501	0.0023	-0.00431		16	-0.01274	-0.00166	0.00465	-0.00364	0.0021	0.00042	0.0064	0.000628
16.1	0.000833	-0.00465	-0.00287	0.00445	0.000948	-0.00109	-0.000665	-0.00194		16.1	0.01095	0.00722	-0.00483	-0.00246	-0.0056	0.00042	-0.000117	-0.01063
16.2	-0.01279	-0.00288	0.00127	0.00445	-0.0032	0.00305	0.00111	-0.0055		16.2	-0.00267	0.00248	-0.0072	0.00406	-0.00442	0.00338	-0.00426	0.00537
16.3	-0.00568	-0.00524	0.00246	-0.00148	0.000948	0.00246	-0.00422	-0.00372		16.3	0.00562	-0.00344	-0.00246	0.00288	-0.00383	0.00516	-0.00249	0.00655
16.4	-0.00391	-0.000506	-0.00702	-0.00207	-0.0032	0.00128	0.00467	-0.00372		16.4	-0.00149	0.00308	0.00761	0.00525	0.00387	0.00042	-0.0013	-0.00115
16.5	-0.00568	-0.000506	0.00186	-0.000885	-0.00201	-0.00524	0.0023	-0.00846		16.5	-0.00267	-0.007	0.00998	-0.00186	-0.00264	-0.00313	-0.0013	-0.00352
16.6	-0.00331	-0.00643	-0.00169	0.00563	-0.00438	0.0072	-0.00363	-0.01261		16.6	0.00503	0.00544	0.00109	0.0011	-0.00383	0.00279	-0.00782	-0.00233
16.7	0.00794	-0.00465	8.7e-05	-0.00503	-0.00379	0.00305	-0.000665	-0.00609		16.7	0.00088	-0.000479	-0.00128	-0.00127	-0.00205	0.00575	0.00344	0.00774
16.8	-0.000944	-0.00288	0.00305	-0.000293	-0.00853	0.00542	0.00704	-0.00076		16.8	-0.00386	-0.00285	-0.0072	0.00465	0.00151	-0.00136	0.00462	0.0024
16.9	0.0032	-0.00288	0.00186	0.000892	-0.0032	0.00542	0.00052	-0.00609		16.9	-0.000897	0.00248	-9.35e-05	0.00228	-0.00264	-0.00195	-0.000117	-0.0053
17	-0.00331	-0.00347	0.00305	-0.00266	-0.00379	-0.00109	0.00348	-0.00728		17	-0.00208	-0.00107	0.00761	0.000507	0.0021	-0.00254	0.00225	-0.00233
17.1	-0.000944	-0.00584	-0.000505	0.00208	-0.00379	0.00305	-0.00244	0.00161		17.1	0.00266	-0.00522	-0.00661	-0.00601	-0.00383	0.00694	-0.00426	0.00833
17.2	-0.00331	-0.00584	0.00127	0.00385	-0.00261	0.00542	-0.00126	-0.00372		17.2	-0.00386	-0.00581	-0.00483	0.00525	0.00328	0.0016	0.00462	-0.000557
17.3	0.00202	-0.00702	0.00246	-0.00325	-0.00675	-0.00405	0.00407	-0.00431		17.3	-0.00386	0.0013	-0.00128	0.00465	0.00151	-0.0055	-0.00426	0.00359
17.4	-0.000352	-0.0011	-0.00287	0.000892	-0.00675	0.000684	-0.00244	-0.00787		17.4	0.00266	-0.00344	-0.00187	0.00406	0.0021	0.00397	-0.00604	0.00774
17.5	-0.00391	-0.00406	-0.0011	0.000892	-0.00853	0.00424	0.00526	-0.00431		17.5	-0.00386	-0.00344	-0.00542	0.0011	0.00921	-0.0055	0.00166	0.003
17.6	0.000241	0.000679	0.00601	-0.00444	-0.00201	-0.000501	0.0023	-0.00431		17.6	0.00384	-0.007	-0.00424	0.0011	0.000913	0.00101	-0.000117	-0.000557
17.7	-0.00509	-0.01117	8.7e-05	0.00148	-0.00261	-0.000501	-0.00185	-0.00372		17.7	-0.00208	0.00308	0.000499	-0.0066	-0.0062	-0.00195	0.000475	0.000628
17.8	0.00143	-0.00228	0.00423	0.00148	-0.00261	0.00128	0.00407	-0.00254		17.8	-0.00741	0.0013	-0.00246	0.0011	-0.00383	-0.000765	-0.00486	-0.00174
17.9	-0.0045	-0.00643	-0.00584	-0.000885	0.00154	-0.00346	0.00407	0.000425		17.9	-0.000897	0.000113	-9.35e-05	0.00584	0.00269	0.00634	0.00166	0.0024
18	-0.00154	-0.00821	0.0072	0.00385	-0.00912	0.00187	-0.00303	-0.00194		18	-0.00149	0.00189	-9.35e-05	0.00525	0.00151	-0.00491	-0.0013	0.00181
18.1	-0.0045	-0.00702	0.00186	-0.00207	-0.00498	-0.000501	0.00348	-0.00491		18.1	-0.00208	-0.00344	-0.01076	0.0011	-0.00383	-0.00136	-0.00426	-0.00233
18.2	0.0032	-0.00288	8.7e-05	-0.000293	0.00687	0.00898	0.00407	-0.00076		18.2	-0.00682	0.000706	-0.00483	0.00702	0.00743	0.00042	0.00107	-0.000557
18.3	-0.00154	-0.00702	0.00542	0.00385	-0.00735	-0.00169	0.00111	-0.00076		18.3	-0.00208	-0.00285	-0.00246	0.000507	0.00328	-0.00254	-0.00367	0.000628
18.4	-0.00272	-0.0011	-0.00524	0.000892	-0.00498	0.00305	-0.00244	-0.00076		18.4	-0.00327	-0.00581	0.01235	-0.00838	-0.00738	0.0016	-0.00189	0.01129
18.5	-0.00509	-0.00288	-0.0011	-0.00385	-0.00557	0.000684	0.00704	-0.00135		18.5	0.00147	-0.00107	0.00346	-0.00127	-0.00797	-0.000173	0.00225	3.53e-05
18.6	-0.0045	-0.00524	0.00127	0.000892	-0.0032	-0.00405	0.00348	0.0022		18.6	0.000288	0.00367	-0.00542	0.00169	0.01039	0.00101	0.0064	-0.00411
18.7	-0.00331	0.000679	0.000679	0.00504	-0.00438	0.000684	0.00052	-0.00431		18.7	-0.00327	0.00189	-0.00187	0.00584	0.00447	0.00338	0.000475	0.01011
18.8	-0.0045	-0.00228	-0.00287	-0.00148	0.000355	0.00128	-0.00481	-0.00194		18.8	-0.00445	0.00189	0.00583	0.00525	0.00032	0.00042	-0.00367	-0.0047
18.9	-0.00331	-0.00524	0.00246	0.00385	-0.00142	-0.00169	0.00704	-0.00431		18.9	0.00147	-0.01173	-0.0072	-0.000678	-0.00146	0.00042	0.00225	-0.00293
19	-0.000352	-0.0011	8.7e-05	0.00208	-0.00735	0.00305	0.00704	-0.00194		19	-0.01097	-0.00759	0.00465	-0.000678	0.00447	-0.00373	-0.00367	0.01011
19.1	-0.0045	-0.00347	0.00186	0.00504	-0.00972	9.17e-05	-0.00363	-0.00609		19.1	-0.00682	0.00604	0.00405	-0.00127	-0.000864	-0.00254	0.00166	0.00359
19.2	0.00202	-0.000506	0.00601	0.000892	-0.00142	0.00128	-0.000665	-0.000168		19.2	-0.00327	0.00426	-0.00128	0.00288	0.00743	-0.00491	0.00403	0.00181
19.3	0.000833	-0.000506	-0.0011	0.00385	-0.00675	-0.00228	0.00822	0.00339		19.3	-0.00149	-0.007	-0.01135	0.00465	0.0021	0.0099	0.00818	0.00714
19.4	0.00261	-0.00643	0.0066	0.00504	-0.00675	-0.00346	0.00348	0.0022		19.4	-0.00208	-0.00818	-0.00246	-0.00779	0.00565	-0.00195	-0.01552	-0.01122
19.5	0.0032	-0.00643	-0.00228	0.00682	-0.000237	0.00305	-7.27e-05	0.00161		19.5	-0.000304	-0.00107	0.00346	-0.00423	0.000913	-0.00432	-0.00545	-0.00411
19.6	-0.00391	-0.00169	0.00305	0.00267	-0.0032	0.00424	-0.000665	-0.00135		19.6	-0.0086	-0.00403	0.00168	0.00998	-0.00264	0.00338	0.00107	0.00537
19.7	-0.00628	0.000679	-0.00287	0.000892	-0.00438	0.00483	-0.000665	-0.00254		19.7	-0.00741	-0.00936	-0.00128	0.00643	-0.00146	-0.000765	0.00403	0.00359
19.8	0.0032	-0.00406	0.00127	0.000892	-0.00853	-0.00109	0.00052	0.00339		19.8	0.000288	-0.00463	-0.00602	0.0011	0.00684	-0.0061	0.00521	0.01011
19.9	-0.00213	-0.00347	0.00483	0.008	-0.0032	-0.00702	-0.00244	-0.00787		19.9	-0.000897	-0.01055	-0.00602	-0.00186	0.000913	-0.00906	-0.0013	0.00833
20	-0.000352	-0.00228	0.00364	-0.00266	0.00272	0.000684	0.0017	0.000425		20	-0.00327	-0.00522	-0.00365	0.00169	0.00684	0.00397	0.00462	-0.00411
20.1	-0.00391	-0.00643	-0.00169	0.000892	-0.00438	-0.000501	0.00881	0.000425		20.1	-0.00149	-0.00759	-0.000686	0.00643	0.00269	-0.00313	0.00284	0.00714
20.2	-0.00628	-0.00169	-0.00643	0.00385	-0.00201	-0.00405	0.00704	-0.00431		20.2	-0.00267	-0.00463	-0.00128	-0.00601	-0.0062	0.00101	-0.00545	0.00774
20.3	-0.0045	0.00364	0.00542	0.00326	-0.00083	0.00128	0.00052	0.000425		20.3	-0.00386	0.00189	0.00168	0.01176	0.00387	-0.00136	-0.00308	-0.0053
20.4	-0.00391	-0.00584	0.00483	0.00148	-0.00379	0.00187	0.00407	-0.00254		20.4	-0.00741	-0.000479	0.00701	0.0011	0.00506	0.00397	0.000475	-0.0053
20.5	-0.00391	0.000679	0.00127	0.00326	-0.00735	-0.00405	0.00467	-0.00254		20.5	-0.000897	0.00367	-9.35e-05	-0.000678	-0.00146	-0.00254	-0.00071	0.00359
20.6	-0.00331	0.00423	8.7e-05	0.000299	-0.00201	-0.00228	0.0017	0.0022		20.6	-0.00149	0.01078	0.00168	0.00169	0.00624	-0.00313	0.00166	0.00181
20.7	0.000833	-0.00406	0.00246	0.000299	-0.00438	0.00483	0.0023	-0.00431		20.7	-0.00682	0.0013	0.000499	0.00228	-0.000272	0.00634	0.00344	-0.000557
20.8	0.000833	-0.00524	0.00423	0.00208	0.00272	-0.00346	0.00052	0.0022		20.8	-0.00327	0.00248	-0.00306	0.00288	-0.00264	-0.000173	-0.00071	0.000628
20.9	-0.000944	-0.000506	0.00483	0.00622	0.000948	0.00424	-0.000665	-0.00846		20.9	-0.000304	-0.01055	-0.00246	0.00288	0.00269	-0.00491	-0.00545	0.003
21	-0.00628	-0.00406	0.0072	0.00208	-0.00201	-0.000501	-0.000665	-0.00135		21	0.00088	0.00248	0.00583	0.00228	0.00684	-0.0061	-0.000117	0.00537
21.1	-0.0045	0.00186	0.00127	-0.00444	-0.0032	0.00128	0.0023	0.01109		21.1	-0.01748	-0.0064	0.00287	0.00406	-0.0056	-0.00195	-0.000117	-0.00352
21.2	-0.000944	-0.00406	0.000679	0.00504	0.000948	-0.00642	0.0023	-0.00491		21.2	-0.00741	-0.00403	0.00287	-0.00542	0.000913	0.0016	0.000475	-0.00233
21.3	0.00616	-0.00524	0.00305	-0.000885	0.000948	-0.00287	-0.00185	-0.00135		21.3	-0.00149	0.00367	0.00405	0.00347	-0.00205	-0.00254	0.00166	0.00418
21.4	0.00439	-0.0011	0.00127	0.00385	-0.00794	9.17e-05	0.00052	0.000425		21.4	0.00266	-0.00403	-9.35e-05	-0.000678	0.00624	-0.00373	-0.01019	-0.00293
21.5	-0.00628	-0.0088	0.00305	0.01096	-0.00379	-0.000501	0.00289	-0.00135		21.5	-0.000897	0.000706	0.00346	0.00584	0.0021	-0.00313	0.00403	-0.00174
21.6	-0.00272	-0.00524	-0.00465	-0.000885	-0.00142	0.00305	-0.000665	-0.000168		21.6	-0.00682	-0.00996	-0.00187	0.00525	-0.00264	-0.000173	-0.00545	0.00122
21.7	-0.00628	-0.00524	0.00186	-0.00503	0.000948	-0.000501	0.00585	-0.00194		21.7	-0.00564	-0.00759	0.00346	-0.000678	0.00684	-0.00432	0.000475	0.00477
21.8	0.00498	-0.00406	0.00246	0.00148	-0.00735	0.000684	0.00467	0.00102		21.8	-0.01274	-0.00581	0.00287	-0.00423	0.00447	0.0016	-0.000117	0.00359
21.9	0.000241	0.00186	0.0072	0.000299	0.0045	-0.00524	0.0023	-0.00076		21.9	-0.0086	-0.00166	0.00168	0.0011	-0.000864	-0.00313	-0.00308	-0.00115
22	0.00261	0.00542	0.00838	0.00267	-0.00438	0.00187	-0.00185	0.00102		22	-0.00445	0.000706	-0.000686	-0.000678	-0.00146	0.00634	-0.00426	0.00537
22.1	0.00261	-0.000506	0.00483	0.00445	-0.00083	-0.00405	0.00407	0.000425		22.1	0.00207	0.00959	0.01235	-0.00186	0.00032	0.00338	0.00462	0.00359
22.2	0.00143	-0.000506	0.00483	0.00504	-0.00083	-0.00702	0.0023	-0.00313		22.2	-0.00801	-0.000479	-0.00128	0.00584	0.0021	-0.00313	0.00284	-0.0053
22.3	0.000833	0.000679	8.7e-05	-0.00207	-0.00142	-0.000501	0.00348	-0.000168		22.3	-0.00327	0.00308	-0.00602	-0.00719	0.00269	-0.00136	-0.00308	-0.00293
22.4	-0.00391	0.00186	0.00246	0.00148	-0.00083	-0.00109	0.00585	-0.00194		22.4	-0.00208	0.00189	-0.00365	0.000507	0.00802	-0.00787	-0.00367	0.00477
22.5	-0.00391	0.00246	-0.000505	0.00563	-0.00142	-0.00346	-0.00126	-0.00313		22.5	0.00207	-0.00107	-0.00306	0.00228	0.00506	-0.00432	-0.000117	0.003
22.6	-0.00331	-0.00406	0.000679	-0.00148	-0.00142	-0.00169	0.00407	-0.00135		22.6	-0.00149	0.000706	-0.00128	0.00643	-0.000272	0.00042	0.00462	-0.00233
22.7	-0.00154	-0.00584	0.00897	0.00445	0.000355	0.00483	-0.000665	0.00161		22.7	-0.00149	0.00308	0.00168	-0.00246	0.00743	-0.0055	-0.00249	0.00892
22.8	-0.00213	0.00897	0.00246	-0.00148	0.0045	9.17e-05	0.00585	-0.00135		22.8	-0.00623	0.01018	0.00524	0.0011	-0.000272	0.0016	-0.0013	-0.00293
22.9	0.00143	-0.000506	-0.000505	-0.00148	-0.00201	-0.00405	0.01	-0.00431		22.9	-0.000304	0.0013	0.00287	0.00584	-0.00797	0.00101	-0.00367	-0.00352
23	-0.01101	-0.00347	0.0066	0.00267	-0.00379	9.17e-05	0.00526	0.00516		23	-0.0086	0.00367	0.00109	-0.00542	-0.000864	-0.00432	0.00284	0.003
23.1	-0.01101	0.00127	-0.00228	0.00267	-0.00735	-0.00228	-0.00126	-0.00431		23.1	-0.00327	0.00722	-0.00128	-8.57e-05	-0.0056	-0.00136	-0.000117	0.00892
23.2	-0.00331	-0.00465	0.00423	0.00741	0.00391	-0.00642	0.00585	-0.00728		23.2	-0.00327	-0.00226	-0.00128	-0.00127	0.01098	-0.00432	-0.00189	0.00418
23.3	-0.00213	0.000679	0.00127	-0.000293	-0.00142	9.17e-05	0.00289	0.00339		23.3	-0.00978	-0.00285	0.00287	0.00406	0.00506	0.00101	-0.00841	-0.00589
23.4	0.00498	0.00364	0.00423	0.00208	-0.00379	-0.00346	-7.27e-05	-0.00609		23.4	-0.00504	0.00308	-0.00187	0.00169	0.000913	0.0016	-0.00308	-0.00115
23.5	-0.00983	-0.0011	-0.0011	-0.000885	0.000948	-0.000501	0.0017	0.0022		23.5	-0.00267	0.00308	-0.00187	0.00525	0.00151	-0.00254	0.00225	0.000628
23.6	-0.000352	0.00483	-0.00169	0.00859	-0.00142	0.00128	-7.27e-05	-0.00728		23.6	0.000288	0.00604	0.00465	0.00584	-0.00146	-0.00847	-0.00486	-0.00589
23.7	-0.00746	0.00542	0.00246	0.00385	0.00154	-0.00109	0.00052	-0.00313		23.7	0.0074	-0.00107	-0.000686	0.00643	0.00387	-0.00847	-0.00308	0.003
23.8	-0.000352	8.64e-05	0.00423	-0.000885	-0.00201	-0.00524	0.00822	0.00457		23.8	0.00562	0.00663	0.000499	0.00465	0.000913	0.0016	-0.0013	-0.00885
23.9	0.00557	-0.0011	-0.00287	-0.00325	-0.00083	0.00779	0.0017	0.00102		23.9	-0.00978	0.01018	0.00109	-0.00186	0.00565	-0.00136	0.00462	-0.00233
24	-0.00272	8.64e-05	0.0072	0.00563	-0.00379	-0.00524	0.00348	-0.00372		24	-0.01097	0.00367	0.00168	-8.57e-05	0.00269	-0.00491	0.00344	0.00418
24.1	0.00498	-0.00643	0.000679	0.00326	-0.0032	0.00305	0.00052	-0.00135		24.1	-0.000897	0.00367	0.00998	-0.00186	-0.00264	-0.00254	-0.00841	0.00418
24.2	-0.00272	-0.00524	-0.0011	-0.000885	0.00213	-0.00169	-0.00303	-0.00313		24.2	0.00621	-0.00107	-0.00365	0.00228	-0.000272	0.00753	-0.00308	-0.00115
24.3	-0.00272	-0.00288	0.00897	0.00267	-0.00201	-0.000501	0.00526	0.00457		24.3	-0.0086	0.000113	-0.0072	0.0011	-0.00264	-0.000765	0.000475	3.53e-05
24.4	0.000241	0.00305	0.00423	0.000299	0.00213	-0.00702	0.00467	0.00457		24.4	-0.00208	-0.000479	0.00524	-0.000678	0.00861	-0.0055	-0.00071	-0.00352
24.5	-0.00391	0.00423	-0.00465	-0.00207	-0.00438	0.00365	-0.000665	-0.000168		24.5	0.00207	-0.007	0.00405	0.00643	0.01158	0.00279	-0.00841	-0.0053
24.6	-0.000944	-0.00288	0.00186	0.00504	-0.000237	-0.00169	-0.00126	-0.00313		24.6	-0.00564	0.00663	-0.00246	0.00643	-0.00205	0.0022	-0.00189	0.00537
24.7	0.0032	-0.00584	0.00186	-0.00207	-0.00438	-0.00702	0.00467	0.00398		24.7	-0.00327	-0.000479	0.000499	-0.00482	-0.00975	-0.00313	-0.00071	0.00359
24.8	-0.00628	0.00779	0.00127	0.00385	0.00569	-0.00169	0.00585	0.0022		24.8	0.00325	-0.0064	0.00938	-0.00779	0.00506	0.00042	-0.00071	0.0024
24.9	-0.00864	-0.00406	0.00127	-0.00148	0.00154	0.00365	0.0023	0.00279		24.9	-0.00386	0.0013	-0.00424	0.00465	-0.00323	0.00042	-0.00367	-0.00233
25	0.00143	0.00423	-0.0011	-0.00385	-0.00201	-0.00346	0.00881	0.00102		25	-0.01097	0.00426	0.00642	0.00347	0.00506	-0.00254	-0.00189	0.00477
25.1	0.00261	-0.00347	0.0066	0.000892	0.0045	-0.00228	0.00111	-0.00254		25.1	-0.00445	0.00189	0.00346	-0.00246	0.00624	-0.00136	0.00166	-0.00648
25.2	-0.000352	-0.00288	-0.00169	-0.00148	0.00154	-0.00109	0.0023	-0.00135		25.2	0.0074	0.000706	0.00465	-0.00127	0.00387	-0.00491	-0.00249	-0.00648
25.3	0.000833	0.00246	0.00364	0.00267	0.000355	9.17e-05	0.0023	0.00161		25.3	-0.00208	0.00426	0.00287	-0.00423	0.0021	0.0022	-0.00426	0.000628
25.4	0.00794	8.64e-05	0.0072	-0.00325	0.00332	-0.00228	-0.00303	0.00398		25.4	-0.000897	0.00604	0.00524	-0.00246	-0.00916	-0.00669	-0.00367	0.000628
25.5	-0.00154	8.64e-05	0.00542	-0.00148	0.000948	0.00128	-0.000665	-0.000168		25.5	0.00503	0.00367	-0.00365	0.00406	0.00269	0.0022	0.00284	-0.00352
25.6	0.0032	0.00186	0.00246	0.00445	-0.00379	-0.000501	0.00526	-0.00254		25.6	-0.00208	0.00485	0.00109	-0.00127	-0.000272	-0.000765	-0.00249	0.01307
25.7	-0.00509	-0.00169	8.7e-05	-0.000293	0.00687	-0.00287	0.0017	-0.00135		25.7	-0.00149	0.000113	-0.00306	0.0088	0.000913	-0.000173	-0.00723	-0.01122
25.8	0.00439	0.00483	-0.000505	0.000892	-0.00083	0.00483	0.00348	-0.00313		25.8	-0.0086	-0.00166	-0.00602	-0.00719	0.01098	0.0022	0.00225	-0.00826
25.9	-0.000944	-0.000506	-0.00287	-0.00444	-0.00972	-0.00583	0.0017	0.0022		25.9	-0.00741	0.00367	-0.00839	0.00347	0.00447	0.00042	-0.00189	0.00833
26	-0.00391	-0.00228	0.00542	0.00563	-0.00142	-0.00228	-0.0054	0.00279		26	-0.000897	0.00367	-0.00128	0.00288	-0.00205	-0.00373	-0.00367	-0.000557
26.1	-0.000352	-0.00169	0.00127	0.000892	-0.000237	-0.000501	0.00467	0.00516		26.1	-0.00801	0.00604	0.00109	0.000507	0.00565	0.00042	0.000475	-0.0047
26.2	0.000833	0.000679	8.7e-05	-0.000885	-0.00379	-0.00465	-0.00126	-0.00194		26.2	-0.00208	0.00308	0.00405	-0.00127	-0.00738	-0.00669	-0.00249	0.00359
26.3	0.0032	0.00186	0.00364	-0.00444	-0.00083	-0.00287	0.00052	0.00161		26.3	-0.01215	0.00189	-0.00128	0.0011	-0.00146	-0.00373	-0.00308	0.00359
26.4	0.00794	-0.00406	0.00186	0.00445	-0.000237	0.00246	0.0023	0.00339		26.4	-0.01334	0.00308	0.00405	-0.000678	-0.000864	0.00397	-0.000117	-0.00411
26.5	0.000241	0.000679	0.00305	-0.00266	0.00391	0.00305	-0.0054	0.00872		26.5	-0.00623	0.0013	0.0082	0.00228	-0.00442	0.00575	-0.01137	-0.00944
26.6	0.00261	-0.0011	0.00423	-0.000293	-0.0032	0.000684	0.00763	0.00813		26.6	-0.00978	-0.00522	-9.35e-05	0.00169	0.000913	-0.00313	0.000475	-0.00352
26.7	0.000833	0.000679	0.00305	0.00445	0.00332	-0.01116	0.00585	0.00516		26.7	-0.000897	0.0013	-0.00128	-0.00246	-0.000272	-0.00254	-0.00367	0.0024
26.8	0.000833	0.00423	0.000679	0.00563	-0.00083	-0.00169	-0.0054	-0.000168		26.8	0.00207	0.00367	-0.00187	-0.00246	0.00032	-0.00313	0.00699	0.00477
26.9	0.00261	0.000679	0.00364	-0.00681	0.000355	0.00128	0.00111	0.00516		26.9	-0.00386	-0.00403	0.0082	-8.57e-05	0.00565	0.0022	-0.0013	-0.000557
27	0.00972	0.00127	0.00127	-0.00444	0.00213	-0.00405	0.00111	0.0022		27	-0.00682	0.00544	-9.35e-05	0.00169	-0.00146	-0.00136	-0.0013	-0.00826
27.1	0.00557	-0.00288	-0.00406	-0.000293	0.00746	-0.00524	0.0023	-0.00135		27.1	-0.00682	0.00485	-0.00128	-8.57e-05	-0.00146	-0.00313	-0.00663	-0.00767
27.2	0.000833	0.00838	0.00246	0.000892	0.00391	-0.00169	0.00052	0.00279		27.2	-0.00682	0.00189	-0.00128	0.0011	-0.00975	-0.00254	-0.000117	0.0024
27.3	0.00794	-0.00347	0.00186	0.000299	-0.00261	-0.00465	0.00111	0.0022		27.3	-0.00741	0.00959	0.0082	-0.00246	-0.00146	-0.00254	-0.0013	0.00418
27.4	0.00261	-0.00347	0.00246	-0.00266	0.00746	-0.00642	-0.00363	-0.00313		27.4	-0.000897	0.0013	-0.000686	0.00643	0.00032	-0.01261	-0.0013	3.53e-05
27.5	0.000833	0.000679	8.7e-05	-0.00207	-0.00557	-0.00169	0.00407	0.00635		27.5	-0.00208	-0.00226	0.00642	0.0011	0.00151	-0.0061	-0.0096	-0.00944
27.6	0.00143	0.00483	0.00246	-0.000293	-0.00498	-0.00228	0.00052	0.0022		27.6	-0.01511	-0.00226	-0.00128	-0.00601	-0.00501	0.00575	-0.00071	-0.00233
27.7	0.00853	0.00186	0.00186	-0.000885	0.00332	0.00246	0.00052	0.00339		27.7	-0.00208	0.000706	0.00465	-0.000678	-0.01093	0.00397	0.00344	0.000628
27.8	0.0032	0.00542	-0.000505	-0.00325	0.0045	-0.00524	0.00052	0.00339		27.8	0.00207	0.00426	-9.35e-05	-0.0066	0.00151	-0.00254	-0.00189	-0.00352
27.9	0.00972	0.000679	8.7e-05	-0.00207	-0.00379	-0.00287	0.00644	0.0022		27.9	-0.00327	0.00544	-0.00128	0.00525	0.00032	0.0016	0.00107	-0.000557
28	-0.00154	-0.0011	0.00305	0.00148	0.00391	0.00365	-0.000665	0.00516		28	0.0068	-0.007	-0.000686	-0.00719	0.00921	-0.00136	0.00166	-0.00352
28.1	0.00498	-0.000506	0.00601	-0.00207	0.000948	-0.000501	-0.000665	0.000425		28.1	-0.01156	0.00248	-0.00187	-0.000678	0.00032	0.00279	0.00225	-0.00115
28.2	0.000241	0.00127	-0.000505	0.000299	0.000355	-0.00702	0.00644	0.00398		28.2	0.00207	0.0013	0.00642	0.00169	-0.00857	-0.00195	0.00284	0.003
28.3	0.00439	-0.00288	-0.00228	-0.00444	0.00628	-0.000501	0.00111	0.0022		28.3	0.00266	-0.00877	-0.00187	0.000507	0.00387	0.00279	-0.01078	-0.0053
28.4	0.00498	0.00305	0.00542	-0.00266	-0.00498	-0.000501	-0.00422	-0.00135		28.4	-0.00623	-0.00581	0.000499	0.00525	-0.0056	-0.00373	-0.00604	-0.00707
28.5	0.00143	0.000679	-0.00169	-0.000293	-0.00261	-0.00228	-0.000665	0.00694		28.5	-0.00327	0.000706	0.00405	-0.00364	-0.000864	-0.0055	-0.00071	0.0024
28.6	-0.000352	-0.00821	8.7e-05	-0.000293	0.00806	-0.00228	0.00941	0.00694		28.6	0.00147	0.00426	0.00524	-0.00542	-0.00146	0.00931	-0.00249	0.000628
28.7	-0.00628	-0.00584	-0.00228	-0.00444	-0.0032	9.17e-05	0.00111	-0.00254		28.7	0.00266	-0.00759	0.00168	-0.00305	-0.00383	0.00101	-0.00486	0.000628
28.8	0.0038	0.00364	0.00542	-0.000293	0.000355	0.00305	-0.00303	0.0022		28.8	0.00266	-0.0064	-9.35e-05	0.00169	-0.000864	-0.000173	0.00818	0.003
28.9	0.00439	0.00127	0.00423	-0.00503	-0.00083	0.000684	-0.00185	0.000425		28.9	-0.00564	-0.00403	0.00109	0.0011	0.00269	-0.00254	0.00699	0.0024
29	0.0032	-0.00347	-0.000505	-0.00918	-0.00142	-0.00346	0.00585	0.00931		29	-0.00386	0.000113	0.00405	-0.00305	-0.00383	-0.00313	0.00166	-0.000557
29.1	0.00143	-0.00169	0.00246	0.000892	0.000355	-0.00702	-0.0054	0.00398		29.1	-0.0086	0.000113	0.00465	0.00525	-0.00738	0.01167	0.00462	-0.00293
29.2	0.000833	0.00246	-0.00524	0.000299	-0.0032	0.00305	0.00289	-0.00254		29.2	-0.00682	-0.00285	-0.00957	0.00998	0.00269	0.00101	-0.0096	-0.00707
29.3	0.0038	-0.00524	-0.00406	-0.00444	0.000355	-0.000501	-0.00126	0.00398		29.3	0.01036	-0.00759	0.00287	-0.00305	-0.00797	0.0022	0.00284	-0.000557
29.4	-0.00391	0.00542	0.00127	0.000299	0.00391	-0.00346	0.00289	-0.00194		29.4	-0.00919	0.00308	-0.00246	0.00288	-0.00205	-0.0061	-0.000117	0.000628
29.5	-0.00154	8.64e-05	-0.00169	0.000299	-0.00201	0.00305	0.00052	0.000425		29.5	-0.01156	-0.00226	0.00998	0.00525	-0.00383	-0.00254	-0.00604	-0.00352
29.6	0.00261	-0.00406	-0.0011	-0.00385	-0.00379	0.00483	0.00052	0.00516		29.6	0.00503	-0.0064	-0.00246	-0.00719	-0.00146	0.00457	0.00521	0.0024
29.7	-0.00628	-0.00406	-0.000505	-0.000885	0.00687	0.00187	0.00467	0.00576		29.7	-0.000304	-0.00344	0.000499	0.00406	-0.00738	0.0022	-0.00308	-0.00352
29.8	-0.00509	-0.00406	0.000679	-0.00385	-0.00379	-0.00109	0.00585	0.00339		29.8	-0.00327	-0.007	-0.00246	-0.01016	0.00624	-0.0055	-0.00071	-0.00767
29.9	0.000833	0.00127	-0.00169	-0.00562	-0.0032	-0.00642	-0.00126	-0.00372		29.9	-0.01037	0.00367	0.00583	0.00169	0.00151	-0.00373	-0.0013	0.00122
30	-0.00331	8.64e-05	-0.00406	0.000892	-0.000237	-0.00169	-0.00659	-0.00076		30	-0.00149	-0.00285	-0.00128	-0.00956	-0.00501	0.00575	0.00166	-0.00648
30.1	0.000241	0.00423	8.7e-05	0.00208	-0.00261	0.00128	-0.00126	-0.000168		30.1	-0.00149	-0.00107	0.00761	0.0011	-0.00264	0.0016	-0.00426	-0.00411
30.2	-0.000944	-0.00406	-0.00169	-0.000885	0.000355	0.00424	0.00467	0.00339		30.2	-0.00564	-0.000479	0.00642	0.00406	-0.00146	0.00457	0.00403	-0.00293
30.3	-0.00805	-0.00524	-0.0011	-0.000293	0.000948	-0.00642	-0.00126	0.00161		30.3	0.00503	-0.000479	0.000499	0.00465	-0.00442	-0.00432	-0.00249	0.00122
30.4	-0.00924	0.00186	0.00186	-0.00207	0.000355	0.00661	-0.00422	0.00161		30.4	0.00266	-0.00107	-0.01016	-0.00719	0.000913	0.00101	0.00758	0.00596
30.5	-0.00568	0.00246	-0.0011	-0.000885	-0.00379	-0.00109	-0.00185	0.000425		30.5	-0.00978	0.00189	-0.00187	-0.00246	-0.00501	-0.00254	0.00284	-0.0047
30.6	-0.00509	-0.00169	-0.0011	0.000299	-0.00142	0.00246	-0.00363	0.00339		30.6	-0.0086	0.00426	0.00583	0.00169	-0.00205	0.0022	0.00521	-0.013
30.7	-0.00391	-0.00228	-0.00406	-0.000293	0.00213	0.00365	-0.00126	0.00339		30.7	-0.000304	0.0013	0.01294	-0.00482	-0.00383	0.00042	0.00284	0.0024
30.8	-0.00746	0.00305	-0.00524	-0.00266	-0.00735	-0.00702	0.00348	0.0022		30.8	-0.00149	-0.00285	0.00109	0.0011	0.0021	-0.00432	-0.00545	0.00359
30.9	-0.000944	-0.00169	-0.00702	-0.00799	-0.00438	0.00602	-0.00185	0.0022		30.9	-0.00682	-0.000479	-0.00128	-0.000678	-0.00738	0.00042	0.00225	-0.00352
31	-0.000944	0.00127	-0.00287	0.000299	0.00628	0.00246	0.00526	-0.00135		31	-0.00623	-0.00759	-9.35e-05	0.00169	0.00151	-0.000173	-0.00367	-0.00589
31.1	-0.00391	0.00305	-0.00228	0.00504	-0.000237	-0.00702	0.0023	0.0022		31.1	-0.00919	0.00189	0.00228	0.00525	-0.00383	0.0016	0.00225	-0.00174
31.2	-0.00628	-0.000506	0.0072	-0.00207	-0.00201	0.00128	-0.00185	0.00576		31.2	-0.01037	0.00308	0.00701	0.00288	0.00151	-0.00254	0.00403	0.00122
31.3	-0.00568	-0.00584	-0.00169	-0.00325	-0.00201	-0.00287	0.00704	0.00161		31.3	-0.0086	-0.01114	-0.0072	0.00347	-0.00975	-0.000765	0.00225	-0.01004
31.4	0.000241	0.00305	0.00127	-0.00148	-0.00201	0.00602	-0.00244	-0.00135		31.4	-0.01037	0.000706	-0.00128	0.0011	0.00565	-0.00136	0.00225	0.00537
31.5	0.00676	8.64e-05	0.000679	-0.00266	-0.00201	0.00365	-7.27e-05	0.00339		31.5	-0.00741	0.00485	0.00109	-0.00719	-0.00205	0.00279	-0.009	0.00477
31.6	-0.00628	-0.00524	-0.000505	0.000299	-0.0032	-0.00524	-0.00363	-0.00076		31.6	-0.00445	-0.00107	0.00346	0.000507	-0.00501	0.00634	-0.00071	-0.00293
31.7	0.000241	-0.00643	0.0066	-0.00207	-0.00083	-0.00169	0.00348	0.00339		31.7	-0.000897	-0.00463	0.000499	-0.000678	0.00447	-0.00313	0.00521	3.53e-05
31.8	-0.00568	-0.00584	-0.00169	0.00208	-0.00142	0.00305	-0.00303	0.0022		31.8	-0.00386	-0.00936	-0.00246	-0.00779	0.00151	-0.00432	-0.00071	-0.00115
31.9	-0.00805	-0.00288	-0.00406	-0.00444	-0.00261	-0.00287	-0.00363	-0.000168		31.9	-0.00386	0.00308	0.00346	0.00821	-0.01093	0.00338	-0.000117	-0.00233
32	-0.00272	-0.00643	-0.000505	0.00622	-0.00083	0.00305	-0.00244	0.00102		32	-0.00208	-0.00226	-0.00246	-0.00542	-0.00323	0.00338	-0.0013	-0.00589
32.1	-0.00509	0.00305	0.0066	-0.00325	-0.0032	-0.00228	-0.00303	0.00398		32.1	-0.00386	-0.00581	0.00405	-0.00719	-0.00797	-0.00313	0.00403	0.0024
32.2	-0.000352	-0.00169	8.7e-05	0.000892	-0.00379	0.00187	-0.00481	-0.000168		32.2	-0.0086	0.0013	0.000499	-0.00305	0.0021	-0.0055	0.00521	0.000628
32.3	-0.00628	0.00305	-0.00584	0.00267	-0.00379	-0.00287	-0.00126	-0.00609		32.3	-0.00267	0.00426	0.00168	0.00169	-0.00797	0.00279	0.000475	0.00655
32.4	-0.00154	-0.0011	-0.0011	-0.00385	-0.00912	-0.00109	-0.00126	0.000425		32.4	-0.00623	-0.000479	-0.00424	0.000507	-0.000272	0.00101	0.00521	-0.00233
32.5	-0.00628	-0.00169	0.00483	-0.00385	0.00213	0.00128	-0.00303	0.00576		32.5	-0.00208	-0.00759	0.000499	0.00228	-0.0056	0.00042	-0.00367	-0.000557
32.6	-0.00746	-0.00347	0.00186	-0.00266	-0.00083	0.000684	-0.00422	-0.00194		32.6	-0.0086	0.0013	-0.00424	-8.57e-05	-0.00442	0.00279	-0.00071	-0.00174
32.7	0.00557	-0.0011	-0.00347	-0.00266	-0.00438	0.00128	0.0017	0.00102		32.7	-0.000897	-0.00522	-0.00365	-0.00423	0.00743	-0.00136	0.00462	-0.00115
32.8	-0.0045	-0.0011	-0.00465	0.000299	-0.00261	9.17e-05	-0.00185	0.000425		32.8	-0.00327	-0.000479	0.00761	-0.00305	-0.00205	-0.00136	0.00699	-0.0053
32.9	-0.00391	-0.00169	0.00364	-0.000885	-0.00438	-0.00169	0.00052	-0.000168		32.9	0.00088	0.00248	-0.00187	-0.00423	-0.00857	-0.000765	-0.00367	-0.0047
33	-0.00154	-0.00643	-0.0011	-0.00503	-0.00675	0.00602	-0.00303	0.0022		33	-0.01156	-0.0064	-0.00187	0.00465	-0.00264	0.01049	0.00225	-0.000557
33.1	0.0032	-0.00465	0.00246	-0.00207	0.00154	0.00246	-0.00185	0.00516		33.1	0.00621	0.00426	0.00998	-0.00364	-0.000864	-0.00432	-0.0013	-0.00411
33.2	-0.00509	-0.00347	0.00186	0.00563	0.000948	0.00542	0.0023	0.000425		33.2	-0.00445	-0.00344	-0.00424	-0.00542	0.00506	-0.000765	-0.000117	-0.0053
33.3	-0.00272	-0.00228	0.00305	0.000299	0.000355	-0.00169	0.00111	-0.00254		33.3	-0.00445	0.00189	-0.00602	0.0011	-0.000272	-0.00136	-0.00071	0.00833
33.4	0.00202	-0.00524	-0.01235	-0.00859	-0.01031	0.00661	-0.000665	0.00161		33.4	-0.00267	-0.00463	0.00879	-8.57e-05	-0.0062	-0.000765	-0.00545	0.00774
33.5	-0.00509	-0.00702	8.7e-05	-0.000293	-0.0032	0.00424	-0.00244	-0.00372		33.5	-0.00208	-0.00463	0.00701	0.00228	0.000913	0.00397	0.00818	0.00537
33.6	-0.00628	-0.00288	0.0072	-0.000885	-0.00142	-0.00228	-0.000665	0.00635		33.6	-0.00445	0.00248	-0.01016	0.000507	-0.00442	0.00397	0.00581	-0.00826
33.7	-0.00568	-0.000506	-0.00228	0.00148	0.00272	-0.00465	-0.00244	-0.00135		33.7	-0.00386	-0.00581	0.00465	-0.00423	-0.00383	-0.01024	-0.0013	3.53e-05
33.8	-0.00568	-0.00169	-0.00169	0.00445	-0.00912	0.000684	0.0023	-0.00965		33.8	-0.00978	-0.00463	0.00938	0.00465	-0.000864	0.00042	0.00166	0.00774
33.9	-0.00628	-0.00288	-0.00228	-0.000885	-0.00201	-0.00465	-0.00303	0.00339		33.9	0.00088	0.00189	-9.35e-05	0.0011	0.000913	0.00931	0.00403	-0.00115
34	-0.00331	0.00127	-0.00228	-0.000293	-0.00201	0.00305	0.00052	0.00694		34	-0.00149	-0.00107	0.00346	-0.00186	0.00151	0.00279	0.00284	-0.01122
34.1	-0.00213	-0.00347	0.00305	0.00208	-0.000237	0.00483	0.00348	-0.00431		34.1	-0.00682	-0.00463	0.000499	-0.00305	0.00565	0.0016	0.00225	0.00122
34.2	-0.00213	-0.00406	8.7e-05	-0.0074	-0.00201	0.00128	-7.27e-05	-0.00135		34.2	-0.00208	0.000113	0.00168	-0.00246	0.00151	0.0016	-0.00367	0.00892
34.3	-0.00628	0.00364	-0.00702	-0.00148	-0.00616	0.00424	-0.00126	0.00457		34.3	-0.00149	-0.00522	-0.00424	0.00347	-0.00205	-0.000765	-0.00486	0.00122
34.4	-0.00272	-0.00465	8.7e-05	0.00208	-0.00201	0.00187	-0.000665	-0.0055		34.4	-0.00978	0.0013	0.00465	0.00465	-0.000864	0.0016	0.000475	0.000628
34.5	-0.0045	-0.00524	0.00246	0.00208	-0.00083	0.00365	-0.00126	0.00102		34.5	-0.00564	-0.00107	0.00405	-0.00364	0.00684	-0.00136	-0.00189	-0.0047
34.6	0.000833	-0.00406	-0.00228	0.000892	0.00391	-0.00109	0.00052	0.00102		34.6	-0.00267	-0.00522	-0.00128	-0.00127	-0.00146	-0.00373	0.01173	0.00122
34.7	0.0032	-0.00406	0.00305	-0.000885	-0.00735	0.00365	-0.00126	-0.000168		34.7	-0.00208	-0.00166	0.00109	-0.00246	-0.00975	0.00575	-0.0013	0.000628
34.8	-0.00391	-0.00465	-0.00228	-0.000885	-0.0032	-0.00169	-0.00837	0.00398		34.8	-0.00386	-0.00166	-0.00306	0.00762	0.00032	0.00042	0.00462	0.00596
34.9	-0.00213	-0.00406	-0.0011	0.00563	-0.01031	-0.00524	-0.000665	-0.00194		34.9	-0.00623	-0.00463	-0.00128	-0.00246	0.00151	-0.00195	0.00284	-0.0047
35	0.000833	-0.00228	0.00246	-0.00622	-0.00675	0.00305	0.00407	0.000425		35	0.0074	0.0013	0.00346	-0.00601	0.00506	0.00397	0.0064	0.003
35.1	-0.000352	-0.00524	0.00305	-0.00385	-0.0032	-0.000501	0.0023	0.00279		35.1	-0.00445	-0.000479	-0.00365	0.0011	0.0021	-0.00432	-0.00308	0.0024
35.2	-0.00154	8.64e-05	-0.00524	-0.00503	-0.01268	0.00542	-0.00126	-0.00491		35.2	0.00088	-0.00285	-0.00779	0.00169	-0.00205	0.00457	-0.00426	-0.00174
35.3	-0.00272	0.00246	-0.00228	-0.00207	-0.00438	0.00128	0.00111	-0.00076		35.3	-0.00327	-0.00581	-0.00187	0.00169	-0.00205	0.00279	-0.00367	-0.00648
35.4	-0.00154	-0.00169	0.00246	0.00563	-0.00201	0.000684	0.00052	-0.00076		35.4	-0.00267	0.000706	-0.00187	0.00169	0.0021	-0.00136	0.00225	3.53e-05
35.5	0.0032	-0.00821	0.00186	0.000299	-0.00142	-0.00583	-0.00718	0.00161		35.5	0.00088	0.0013	0.00346	-0.00246	-0.00442	-0.00254	0.00225	0.0024
35.6	0.000833	-0.00643	-0.00169	0.00267	-0.00083	0.00128	-7.27e-05	0.000425		35.6	-0.01393	0.00367	-9.35e-05	0.00169	0.00447	0.00279	0.00758	-0.00115
35.7	0.00143	-0.00702	-0.01058	-0.00325	-0.00735	0.0072	0.00348	-0.0055		35.7	0.00088	0.0013	0.000499	-0.00364	-0.00442	0.00694	-0.00486	-0.00707
35.8	-0.00509	-0.00702	0.00305	-0.00148	-0.00438	-0.00346	0.0023	-0.00194		35.8	-0.00327	0.00722	0.00346	-0.00482	0.00269	0.0016	0.00344	0.00418
35.9	-0.00687	-0.00406	0.00305	0.00267	-0.00083	0.00542	0.00348	0.00753		35.9	-0.00623	-0.00226	-0.000686	0.00228	0.00269	0.00042	0.000475	-0.00115
36	0.00202	-0.00761	0.00186	-0.00385	-0.00261	-0.00287	0.0023	0.00457		36	-0.00149	-0.00463	-9.35e-05	0.00288	0.00506	0.00753	-0.00663	-0.00293
36.1	-0.00213	-0.00406	-0.00228	0.000299	-0.00201	0.00483	-0.00363	-0.00431		36.1	0.00088	0.000706	0.00346	-0.00719	-0.00205	-0.00373	-0.00308	0.00833
36.2	-0.00509	-0.00406	0.00305	0.00504	0.000355	-0.00109	-0.00303	0.00161		36.2	-0.00623	-0.00463	-0.00187	-0.00601	-0.0056	-0.00195	0.00284	0.00359
36.3	-0.00628	-0.000506	8.7e-05	0.00148	-0.00438	0.000684	-7.27e-05	-0.00905		36.3	-0.00267	0.00367	0.00465	-8.57e-05	-0.00501	-0.00254	-0.00663	3.53e-05
36.4	-0.00331	-0.00406	0.000679	-0.000293	-0.00675	0.00128	-0.000665	-0.000168		36.4	0.00147	0.000113	0.00346	0.00406	0.0021	-0.00669	0.00699	0.003
36.5	-0.00983	-0.0088	0.00423	-0.0074	-0.00616	0.00483	-0.00422	-0.00431		36.5	-0.00267	0.00189	0.00405	0.00288	0.00269	0.00457	0.000475	-0.00174
36.6	-0.00391	-0.00288	-0.00406	0.00326	-0.00438	0.00128	0.00407	-0.00491		36.6	-0.00445	-0.00581	-0.00365	-8.57e-05	-0.00501	0.00457	-0.000117	3.53e-05
36.7	0.00261	0.00186	0.00305	-0.00444	-0.00675	0.00128	0.00585	-0.00431		36.7	-0.00978	-0.00996	-0.000686	0.00406	0.00387	-0.000765	-0.00308	-0.00115
36.8	0.0109	-0.00761	0.00186	0.00267	-0.00438	9.17e-05	-0.0054	-0.00372		36.8	0.00207	0.00426	-0.00187	-0.00127	0.00269	-0.00373	-0.0013	-0.00648
36.9	-0.00272	-0.000506	0.00601	0.000299	-0.0032	0.00898	0.00348	-0.00491		36.9	0.00266	0.009	-0.00365	-0.00127	-0.0056	-0.00787	0.00699	0.00596
37	0.0038	-0.00761	0.000679	-0.000293	0.000948	-0.00287	-0.000665	-0.00194		37	0.00443	0.00189	-0.00424	0.00347	0.00387	0.00338	-0.00841	0.003
37.1	-0.000352	-0.0011	-0.00228	-0.00207	0.000355	0.00424	0.00111	0.00516		37.1	0.00621	0.00426	0.00405	0.00228	0.00506	0.01108	-0.00308	0.000628
37.2	-0.00391	-0.00406	-0.000505	0.000892	-0.00083	9.17e-05	-0.000665	-0.00194		37.2	-0.00682	0.000113	-0.000686	-8.57e-05	-0.00383	0.00457	-0.000117	0.00655
37.3	0.00143	-0.000506	0.00423	0.00148	-0.00498	-0.000501	-7.27e-05	-0.00668		37.3	-0.00327	-0.00403	-0.00779	0.000507	-0.00501	-0.000765	-0.000117	0.00477
37.4	0.00202	0.00305	-0.00169	-0.000293	-0.00557	-0.00228	0.00111	-0.00076		37.4	-0.00149	0.000113	0.00168	-0.00364	-0.00679	-0.00254	-0.0013	0.00774
37.5	0.000241	-0.00643	0.00956	0.00445	-0.00794	0.00898	0.00052	0.000425		37.5	0.00088	-0.000479	-0.00542	0.00584	0.00328	-0.00136	0.00403	-0.00293
37.6	0.000241	-0.000506	-0.0011	0.00563	-0.00498	0.00365	0.00407	0.00102		37.6	-0.00564	0.000706	0.00109	0.00228	0.00624	0.0022	-0.00189	0.000628
37.7	0.00261	-0.000506	-0.00406	-0.00207	-0.00083	0.00305	0.00111	-0.00313		37.7	0.00562	0.000113	-0.00365	0.00228	0.000913	-0.00847	0.00284	-0.00233
37.8	0.000833	0.00186	0.00246	-0.00385	0.000948	0.00365	0.00763	0.000425		37.8	-0.000897	-0.00522	-0.00306	-8.57e-05	-0.00383	0.0022	0.00344	-0.00233
37.9	-0.00391	-0.00288	0.00601	0.00563	-0.00142	0.00365	-0.0054	-0.00135		37.9	0.00384	-0.00166	-0.00128	0.000507	0.01217	-0.00313	-0.00723	0.00537
38	-0.00154	-0.0011	0.00246	-0.00148	-0.00735	-0.00346	-0.00363	-0.00076		38	-0.00801	0.00604	-0.00779	0.00288	-0.00146	-0.00313	0.000475	0.0024
38.1	-0.00924	-0.00998	-0.00228	-0.000293	0.000948	0.00246	0.00526	-0.00254		38.1	-0.01274	-0.00581	0.00346	0.000507	-0.00323	0.0022	0.00166	0.000628
38.2	-0.00154	-0.00169	0.00423	0.00445	-0.00794	-0.00346	-0.00244	0.00102		38.2	0.000288	-0.00522	0.00938	-0.00305	-0.00205	0.0022	0.000475	-0.00411
38.3	-0.00391	8.64e-05	0.00956	-0.00562	-0.00379	0.00365	-0.000665	-0.00076		38.3	0.00858	-0.00344	-0.00128	0.00169	0.000913	-0.000765	-0.01019	3.53e-05
38.4	-0.01101	-0.00288	0.00186	0.00622	0.00272	0.00246	0.0017	0.0022		38.4	0.00207	0.00604	-0.00661	0.0011	0.00743	0.01049	-0.00486	-0.00115
38.5	-0.000352	-0.00169	-0.00406	-0.00266	-0.00438	-0.00169	0.00467	-0.00787		38.5	-0.00149	0.0013	0.00465	-0.00305	-0.00264	0.00516	-0.00189	0.000628
38.6	-0.00154	-0.00288	0.00186	-0.00207	-0.00735	-0.00405	-7.27e-05	0.00102		38.6	0.00207	-0.0064	0.00109	0.00288	-0.00857	-0.00787	0.00936	0.00122
38.7	-0.00272	-0.00288	0.00364	0.00504	-0.00261	0.000684	-0.00363	0.00279		38.7	-0.00149	0.00841	-0.00424	0.00288	-0.00264	0.00042	-0.00249	0.00122
38.8	0.000833	0.00246	0.00246	0.00267	-0.00261	-0.00109	0.0023	-0.00194		38.8	-0.00386	0.00308	-0.00661	-0.00127	0.00032	0.00279	-0.00782	0.00477
38.9	-0.00331	0.00305	0.00246	-0.00207	-0.000237	-0.00465	0.00526	-0.00431		38.9	-0.00564	0.0013	0.00109	-0.00305	-0.00146	0.0016	0.00107	0.00833
39	-0.00983	0.00186	-0.00228	0.00208	0.000355	0.00602	-0.00363	-0.00372		39	-0.00327	-0.007	0.00346	0.00525	-0.00383	-0.00313	-0.00189	0.0024
39.1	0.000833	-0.00761	0.00246	-0.00325	-0.00735	0.00602	0.0023	-0.00076		39.1	0.00384	-0.00403	-0.00128	-0.00364	0.00624	0.00279	-0.00071	0.003
39.2	0.000241	0.00246	-0.00169	0.00682	-0.00735	-0.00169	0.00348	-0.000168		39.2	0.00088	0.00485	-0.00187	0.01354	0.00921	0.00575	-0.00367	0.00477
39.3	-0.00509	-0.00406	0.0072	0.00622	-0.00201	-0.00465	0.00407	-0.00076		39.3	0.000288	0.00485	-0.00898	0.0011	-0.00383	0.0022	-0.00367	0.0024
39.4	0.0032	-0.00761	0.00483	0.000892	-0.00616	0.00128	0.00052	-0.000168		39.4	-0.00504	-0.000479	0.00168	-0.00246	0.00151	-0.00787	0.000475	0.0024
39.5	0.0038	0.000679	-0.0011	0.000299	-0.00261	-0.00109	0.00822	-0.00194		39.5	-0.00149	0.0013	0.00287	0.00228	0.00624	0.00457	0.00284	0.00181
39.6	-0.00746	-0.0011	8.7e-05	0.00563	-0.00438	-0.00287	0.00111	-0.00728		39.6	-0.00623	-0.00463	-0.00128	0.00821	0.00447	0.00753	-0.00367	-0.000557
39.7	-0.00628	-0.0011	-0.0011	0.00385	-0.00142	0.00483	-0.00303	0.00339		39.7	-0.00741	-0.00107	0.00346	0.00525	0.00032	-0.00432	0.00107	0.00774
39.8	-0.00509	-0.00169	0.00305	0.000299	-0.00201	-0.000501	0.00348	-0.00135		39.8	-0.00149	0.00781	0.00701	-0.00838	-0.00205	-0.00254	-0.00189	0.00359
39.9	0.00143	0.00127	0.00897	0.00148	-0.000237	9.17e-05	-0.00481	-0.00254		39.9	0.00325	0.000706	-0.000686	0.00643	-0.00383	0.00279	-0.00604	3.53e-05
40	-0.00331	-0.00524	-0.0011	0.000892	-0.00675	0.00128	0.00763	-0.00194		40	-0.01037	0.000706	0.00465	0.0088	-0.000864	0.0022	0.00284	-0.000557
40.1	-0.00805	-0.000506	0.00246	-0.00385	-0.00083	0.000684	0.0023	-0.00076		40.1	-0.00208	0.000706	-0.00365	0.00939	0.01335	-0.0055	0.00818	0.000628
40.2	-0.00331	8.64e-05	0.00186	0.00385	-0.00853	0.00661	-0.00126	-0.0055		40.2	-0.000897	0.00663	-0.01016	-0.00305	-0.00383	0.00042	-0.000117	0.003
40.3	-0.0045	-0.00288	-0.0011	-0.00148	0.00154	-0.00109	0.00467	-0.00313		40.3	-0.00504	-0.00226	-0.000686	0.00228	-0.00857	-0.00313	0.00166	0.00596
40.4	0.00143	0.00483	0.0072	0.000892	-0.00675	-0.00346	0.00585	0.00279		40.4	-0.00504	0.00367	0.00405	-0.00779	0.00151	0.00575	0.00225	0.000628
40.5	-0.00568	-0.00228	0.00542	0.00682	-0.00853	0.00424	0.0017	0.00279		40.5	-0.01097	0.00604	0.00405	0.00584	0.00151	0.0022	-0.01019	0.00714
40.6	-0.0045	-0.00998	0.01134	0.00622	0.00332	-0.00702	0.00644	0.00516		40.6	-0.00564	0.00308	0.00109	0.00584	0.00328	0.0016	-0.00308	-0.00115
40.7	-0.000352	0.00483	-0.00169	-0.000293	0.00213	9.17e-05	0.00526	-0.00194		40.7	-0.00386	-0.00403	0.00109	0.0088	0.00151	0.01049	0.00225	-0.000557
40.8	-0.000352	-0.00169	0.00364	0.00385	-0.00379	0.00305	0.0023	-0.00135		40.8	-0.000897	0.00663	-0.00128	0.00643	-0.00797	-0.00373	0.00284	0.00359
40.9	-0.00154	-0.00643	0.00897	0.00622	-0.0032	-0.00109	-0.000665	-0.00491		40.9	0.000288	0.0013	-0.00661	0.00465	0.000913	-0.00254	-0.0013	0.00359
41	-0.00568	-0.00169	0.00483	0.00267	-0.00557	0.00246	0.00052	-0.00194		41	0.00207	0.0013	0.00287	-0.00601	0.00565	-0.00373	0.00107	3.53e-05
41.1	-0.00272	-0.00169	-0.000505	0.00385	-0.00261	-0.00228	-0.00185	0.00398		41.1	-0.00623	0.0013	0.00287	0.00169	-0.00323	-0.000173	-0.00189	0.00359
41.2	-0.00568	0.00838	0.000679	0.00859	0.00213	-0.00346	0.00289	-0.01024		41.2	-0.000304	-0.00877	-0.00246	0.0011	-0.00146	0.00397	-0.00249	0.00714
41.3	-0.00568	8.64e-05	0.00897	-0.00325	-0.00083	9.17e-05	0.0017	0.00161		41.3	-0.00208	-0.00818	-0.000686	0.0011	0.00328	-0.00195	-0.00071	0.00122
41.4	-0.00568	-0.00347	0.00246	-0.000885	-0.00261	0.00305	0.00348	-0.00135		41.4	-0.00623	-0.00344	-0.00306	0.0088	0.00447	-0.00136	0.00403	0.00418
41.5	-0.000944	8.64e-05	-0.000505	0.00622	-0.00201	-0.00465	-7.27e-05	-0.00372		41.5	0.00325	0.00663	0.00109	0.00228	0.00032	0.0016	0.000475	-0.00293
41.6	-0.000352	0.00364	-0.00169	0.00563	-0.00201	-0.00524	0.00052	-0.00313		41.6	0.00858	0.00189	0.000499	-0.00305	-0.00323	-0.00669	0.00284	0.00122
41.7	-0.00746	-0.00169	0.00186	-0.00325	-0.00142	0.00128	-0.00303	0.00872		41.7	-0.000304	-0.00936	-0.00483	0.00525	0.00506	-0.00432	-0.00545	-0.00648
41.8	0.00143	-0.000506	0.00838	0.00326	0.00154	-0.00346	0.00526	0.00398		41.8	-0.00919	-0.000479	0.00642	0.00465	0.00269	0.00694	-0.00071	-0.00293
41.9	-0.00568	-0.00406	0.00423	0.00622	-0.000237	-0.00169	0.00941	-0.000168		41.9	-0.00682	0.00189	0.00168	-0.00542	0.00743	-0.00373	-0.00189	-0.0047
42	-0.00628	0.00127	0.00601	-0.00325	-0.0032	0.00424	-7.27e-05	-0.000168		42	-0.00267	0.000706	-0.00306	0.00643	0.00387	0.00397	-0.00367	0.00596
42.1	-0.00687	0.00127	-0.00287	-0.000885	0.000355	0.00305	0.0023	-0.00254		42.1	0.0074	0.00544	-0.00542	-0.00127	0.00506	-0.00906	-0.00486	0.0024
42.2	-0.00924	8.64e-05	-0.000505	0.00978	0.0045	-0.00287	0.0023	0.00279		42.2	-0.00741	0.00308	0.00287	-0.00246	-0.00205	-0.00136	-0.00545	0.0024
42.3	-0.00805	-0.00288	-0.00169	-0.000293	-0.00853	-0.00228	0.0023	0.00576		42.3	-0.00682	-0.00285	-0.00542	-0.000678	0.000913	0.00279	-0.00071	-0.00707
42.4	-0.01042	0.00423	0.00483	-0.000293	-0.00261	9.17e-05	0.00407	-0.00431		42.4	-0.00741	-0.000479	-0.000686	0.00643	-0.000272	0.0016	-0.00071	0.00122
42.5	-0.01042	-0.00406	0.00127	-0.000885	-0.00142	-0.00346	0.00052	0.000425		42.5	0.000288	-0.00166	0.00465	-0.00186	0.00269	0.0022	0.00521	0.00774
42.6	-0.00509	-0.00228	0.00779	0.00208	-0.00201	-0.000501	0.00348	0.0022		42.6	-0.00564	0.00189	0.00701	-0.0066	-0.000272	0.0022	-0.00249	0.00655
42.7	0.000241	-0.00406	0.00127	-0.00207	-0.00261	9.17e-05	0.00348	-0.00194		42.7	-0.00386	-0.00344	-0.00128	-0.00364	0.00447	0.00101	-0.01019	-0.000557
42.8	-0.00805	-0.00347	0.00127	0.000892	0.000355	9.17e-05	0.00467	-0.00076		42.8	-0.00623	-0.00522	0.00405	-8.57e-05	-0.00501	-0.00787	-0.00189	0.0024
42.9	0.000241	0.00423	0.00838	0.00859	-0.0032	0.00305	0.00111	0.00339		42.9	-0.00504	0.00722	0.00228	0.00347	0.000913	-0.000765	-0.00723	0.00714
43	0.00143	0.00246	8.7e-05	0.00385	0.000355	-0.00879	0.00407	-0.00254		43	-0.00208	-0.00463	-0.00542	0.00821	0.00624	0.00101	-0.00189	0.00537
43.1	-0.000944	8.64e-05	0.00305	-0.00207	0.00154	-0.00524	0.00467	0.000425		43.1	-0.00682	0.000706	0.00168	-0.00364	0.00506	-0.00906	-0.000117	-0.00707
43.2	-0.00568	-0.00406	0.00423	0.00385	0.0045	-0.00346	0.00348	-0.000168		43.2	-0.01274	0.00367	-0.00128	0.00762	0.00565	-0.00373	-0.000117	-0.00233
43.3	0.0032	-0.00228	0.00601	-0.00207	0.00213	0.00128	0.00526	-0.00254		43.3	-0.00801	-0.00403	-0.000686	-0.00423	0.00387	0.00338	0.000475	-0.00411
43.4	-0.00331	0.00246	-0.00287	0.000299	-0.00261	-0.00524	0.00348	-0.00135		43.4	-0.00386	0.00663	-0.00483	-0.00246	0.00447	0.00397	0.00344	0.000628
43.5	-0.000352	0.00423	0.0066	0.00563	-0.00379	-0.00228	0.0017	0.00576		43.5	-0.00149	0.00959	-0.00128	0.000507	0.000913	0.00042	0.00581	0.00655
43.6	-0.00509	-0.00465	0.00364	0.00504	-0.000237	0.00602	0.00111	0.000425		43.6	-0.00978	-0.00936	-9.35e-05	0.00228	-0.0062	-0.00373	0.00877	-0.0047
43.7	-0.00331	-0.00584	0.00364	0.000299	0.00865	-0.00346	-0.000665	-0.00313		43.7	-0.00267	0.00485	0.00701	-0.00305	0.000913	-0.00373	-0.01019	0.0024
43.8	0.00676	0.00364	-0.000505	0.000299	-0.00261	0.00365	0.0023	0.00457		43.8	0.01214	0.00485	-0.00306	-0.00423	-0.00146	-0.0061	-0.0096	3.53e-05
43.9	0.000241	-0.00347	0.00305	0.00267	-0.00261	-0.00228	0.00407	0.0022		43.9	-0.00978	-0.00936	-9.35e-05	0.00169	-0.00146	-0.00432	-0.00426	0.00714
44	-0.00272	-0.00465	0.00364	-0.000293	-0.00379	-0.00346	0.00348	-0.00135		44	-0.000304	-0.00581	0.0082	0.00821	0.00565	-0.00136	0.00107	0.000628
44.1	0.00202	0.00246	-0.000505	0.000892	0.000355	0.00128	0.00941	0.000425		44.1	0.00325	0.00604	0.00109	0.00288	0.00032	0.00753	0.00225	-0.0047
44.2	-0.000352	0.00127	0.0066	0.00208	-0.000237	-0.00169	0.00526	-0.000168		44.2	-0.000897	0.00248	-0.00306	0.00169	0.00328	-0.0061	0.00107	0.000628
44.3	-0.00272	-0.00584	0.00542	0.00267	0.000948	-0.00287	0.00348	-0.00194		44.3	-0.00208	-0.00285	0.00346	0.00228	0.00151	0.00101	0.00225	0.003
44.4	-0.00391	0.00127	0.00246	0.00622	0.00213	-0.00405	0.00052	0.000425		44.4	-0.0086	-0.00285	0.000499	0.00347	-0.00442	0.00042	-0.0013	-0.000557
44.5	-0.000352	0.00246	-0.000505	-0.00681	-0.00261	-0.00169	0.00052	0.0022		44.5	-0.00682	-0.00107	-0.00246	0.00228	0.00506	0.0022	-0.00426	0.000628
44.6	0.000241	0.00127	0.00305	0.00208	0.00391	0.00246	0.00111	-0.00491		44.6	-0.00445	-0.00403	-0.00246	-0.00482	0.00269	-0.0055	-0.00723	-0.00352
44.7	0.000833	-0.00524	0.00246	0.00385	-0.00438	0.00128	0.00644	0.00279		44.7	0.00325	0.00367	0.00701	-0.00542	-0.00975	-0.00313	-0.00426	0.000628
44.8	0.0038	0.00246	-0.00169	-0.00148	-0.00201	-0.000501	0.00407	0.0022		44.8	-0.00564	-0.00522	-0.00661	-0.00186	0.00684	0.0016	0.000475	-0.00293
44.9	-0.000944	0.00364	0.00127	0.00385	0.00272	-0.00405	0.00407	0.00576		44.9	0.0074	0.00841	0.00642	0.000507	0.01098	0.00338	-0.00486	-0.00648
45	-0.000352	-0.0011	0.00246	-0.000885	-0.000237	-0.00405	0.00585	0.00339		45	-0.00208	0.000113	0.00168	-0.000678	-0.00205	-0.000765	-0.00071	0.00477
45.1	0.00143	-0.00288	-0.0011	0.00504	0.00806	-0.00169	0.00052	-0.00135		45.1	-0.00682	0.00544	0.01116	0.00288	0.00328	-0.00136	-0.00189	-0.00411
45.2	0.000833	-0.00524	0.00305	0.000299	-0.00201	-0.00405	-0.000665	-0.00135		45.2	-0.01274	0.000113	-0.00957	0.00643	0.00269	0.00101	0.00284	0.00122
45.3	-0.00154	-0.00524	0.00483	-0.00207	-0.00142	-0.00169	-0.00422	0.00339		45.3	0.000288	-0.00877	0.00346	0.00347	-0.0056	0.00042	0.00462	0.00477
45.4	-0.00331	0.00423	0.00246	-0.000293	0.0045	-0.00405	0.00111	0.00279		45.4	-0.000304	0.00308	0.00642	-0.00542	0.00802	-0.00254	-0.00604	-0.00233
45.5	-0.00154	0.00423	0.00838	0.00918	0.000355	-0.00405	0.00704	-0.00254		45.5	0.00207	0.01018	0.00228	0.00288	-0.000272	-0.00373	-0.00071	-0.00767
45.6	-0.000944	-0.0011	-0.000505	0.000299	0.000948	0.00305	0.00289	-0.00135		45.6	0.00325	-0.000479	-0.00661	0.00643	-0.00383	-0.00313	0.00284	0.00418
45.7	0.00498	-0.00465	0.00305	-0.00266	0.00272	9.17e-05	0.00348	0.0022		45.7	-0.000304	0.000113	0.00465	0.00465	0.00684	-0.000765	-0.009	-0.00233
45.8	-0.00154	-0.00169	0.00246	-0.000293	-0.00142	-0.00169	0.00111	0.00161		45.8	0.00384	-0.00226	0.01057	-0.00897	-0.000864	-0.00313	0.00344	-0.00115
45.9	-0.000944	0.000679	-0.00406	-0.00503	-0.0032	-0.00109	0.00052	-0.00254		45.9	-0.00267	0.00308	-0.00306	0.00228	-0.000272	0.00516	0.00403	-0.00352
46	-0.000352	0.00127	0.00423	0.00385	-0.00142	-0.00346	0.00407	0.00457		46	-0.00623	0.00189	-0.00424	0.0011	0.0021	-0.00313	-0.00426	0.00181
46.1	0.00143	0.00483	-0.000505	0.00148	0.00272	-0.00109	-7.27e-05	0.00457		46.1	-0.00564	0.000113	0.00465	0.00465	-0.00146	-0.00728	-0.00071	0.003
46.2	0.00913	-0.000506	0.00246	-0.000885	0.00154	0.00305	0.0023	0.00161		46.2	0.00325	-0.0064	-9.35e-05	0.00465	0.00684	-0.00373	-0.0013	-0.00115
46.3	0.00557	-0.00406	0.00542	-0.000885	-0.00083	-0.00228	0.00881	-0.000168		46.3	-0.00267	-0.000479	-0.00246	-0.00186	0.00387	0.0022	-0.00189	0.00833
46.4	0.00616	-0.000506	0.00483	0.00504	-0.00083	-0.00346	0.00467	-0.00076		46.4	-0.00267	0.00959	0.00109	-0.00186	-0.00501	-0.00195	-0.00249	-0.00115
46.5	-0.00272	8.64e-05	-0.00228	-0.00503	0.00391	-0.0082	-7.27e-05	0.00694		46.5	-0.00445	-0.000479	-0.00365	0.000507	-0.00797	-0.00195	-0.00367	-0.00648
46.6	0.00261	0.000679	0.00246	0.00148	0.00154	-0.000501	-0.00185	0.00516		46.6	-0.00564	-0.00581	0.00938	0.00702	0.00447	-0.00432	-0.00367	-0.00411
46.7	0.000833	0.000679	8.7e-05	0.00208	-0.00261	-0.000501	0.0017	0.0022		46.7	-0.0086	0.00308	0.00346	-0.00186	0.00032	-0.00669	-0.00071	0.00418
46.8	-0.00391	-0.00169	0.000679	0.00504	-0.00557	-0.00169	-0.00126	0.00931		46.8	0.00207	-0.000479	-0.000686	0.00347	-0.00146	0.00279	0.00225	0.003
46.9	-0.00213	0.00246	0.00364	0.00445	0.0045	-0.00405	0.00348	0.000425		46.9	0.00799	-0.00107	-0.00246	-0.00601	0.00151	-0.00432	-0.00841	-0.00648
47	0.00202	8.64e-05	0.000679	-0.000885	0.00272	-0.00169	0.00111	-0.00491		47	-0.00267	-0.000479	0.00465	-0.000678	-0.00679	-0.00254	-0.00071	3.53e-05
47.1	-0.00391	0.00542	-0.000505	-0.000293	0.00213	0.000684	0.00289	0.0022		47.1	-0.0086	0.009	0.00583	0.00584	0.00802	0.00338	0.00225	-0.00293
47.2	-0.00391	0.00127	0.00127	-0.000885	0.00154	-0.00346	0.0023	-0.00076		47.2	-0.00741	0.00722	-0.000686	-0.00482	0.000913	0.00397	0.00166	-0.00233
47.3	0.0038	-0.0011	0.00305	-0.00207	0.000948	0.00246	0.00348	0.00516		47.3	0.000288	-0.000479	-0.000686	-8.57e-05	-0.000864	0.00042	-0.00426	0.000628
47.4	-0.00509	-0.00347	0.00838	0.00148	-0.00142	9.17e-05	-0.00363	-0.00076		47.4	0.00147	-0.00581	-0.00424	-0.00719	0.00269	-0.00195	-0.00723	-0.000557
47.5	-0.00154	0.00364	-0.00524	-0.00266	0.00509	-0.00583	-0.000665	0.00279		47.5	-0.00386	0.00367	0.01057	0.00288	-0.000864	-0.00847	0.00166	0.000628
47.6	-0.000944	-0.00643	8.7e-05	-0.00148	0.00391	-0.00169	0.00052	0.0022		47.6	-0.00267	-0.00344	0.00938	-0.00542	0.00151	0.00279	-0.00189	-0.00648
47.7	-0.00331	0.000679	-0.0011	0.00385	0.000355	-0.00287	0.00111	0.00102		47.7	-0.000304	-0.00818	-0.00839	-0.00305	0.00032	0.00279	0.00225	-0.00174
47.8	0.000833	0.00246	0.00127	0.00385	-0.00261	-0.00524	-0.00126	-0.00254		47.8	0.00147	0.009	0.000499	0.00465	0.00447	-0.00965	0.00166	-0.0047
47.9	-0.00213	-0.00465	0.00364	0.00208	-0.00142	9.17e-05	0.00763	-0.00135		47.9	-0.000897	0.01611	0.00405	-0.00246	0.00447	0.00338	-0.00189	0.003
48	-0.00568	0.00246	-0.00228	-0.000293	0.00391	-0.00405	0.00348	0.00516		48	-0.00149	0.00722	0.0082	0.00465	-0.00857	0.00279	-0.00367	-0.00944
48.1	-0.00746	-0.00643	0.00127	0.00208	-0.00201	0.00187	-0.00244	0.00694		48.1	-0.0086	-0.00581	-0.00306	-0.00542	0.01039	-0.00313	0.0064	0.000628
48.2	-0.00154	-0.00702	0.00127	-0.000885	0.00687	-0.00169	-0.00126	0.00161		48.2	0.00562	0.00248	-0.000686	-0.00482	-0.00264	0.0099	-0.00189	0.00122
48.3	0.00202	-0.0011	-0.00406	0.00563	-0.00083	0.00483	-0.000665	-0.000168		48.3	-0.00386	-0.01943	0.00109	0.00406	-0.00797	-0.00195	0.00107	-0.00352
48.4	-0.00331	0.00127	-0.0011	-0.00503	0.00509	-0.00879	0.00052	0.00635		48.4	0.00503	0.000113	0.000499	-0.000678	0.01158	-0.00669	0.00403	-0.0047
48.5	-0.00391	-0.00347	0.00246	-0.000885	-0.00794	-0.00228	0.0017	0.00339		48.5	0.00147	0.00544	0.00465	0.00169	-0.00264	-0.00669	-0.00308	-0.0047
48.6	-0.000944	-0.00465	0.00364	0.00445	-0.00201	0.000684	0.00111	0.00339		48.6	-0.00564	-0.00285	0.00168	0.00169	-0.00146	0.00516	-0.00545	-0.0053
48.7	-0.0045	-0.00761	-0.00465	0.00148	0.00332	0.00365	0.00111	0.000425		48.7	-0.00149	-0.00285	0.00583	-0.00186	-0.00146	-0.00847	0.00344	-0.0047
48.8	-0.000352	0.000679	0.00186	-0.000293	-0.00616	0.00187	-0.00185	0.00813		48.8	0.00443	0.00189	-0.00128	0.00525	0.00565	-0.00136	0.00284	0.00477
48.9	-0.00746	-0.00228	0.0066	-0.000885	-0.000237	-0.00109	0.00407	0.00279		48.9	0.00621	-0.000479	0.00879	0.0011	-0.00679	0.00753	-0.00071	0.00477
49	-0.00983	8.64e-05	-0.00228	0.000299	0.00806	-0.000501	0.0023	0.00339		49	0.000288	-0.00403	-0.00187	-0.00246	-0.00146	-0.00313	-0.00486	0.00537
49.1	-0.000944	-0.0011	-0.00465	-0.000885	0.00154	-0.00169	-0.00303	0.000425		49.1	-0.00623	0.00189	-0.00602	-0.00127	0.00269	-0.00195	-0.0013	-0.00293
49.2	0.000241	-0.00584	0.00186	-0.00325	-0.00438	-0.00169	0.00881	0.00457		49.2	-0.00801	0.00663	-0.00187	0.00228	0.00328	-0.00847	-0.00604	-0.00411
49.3	-0.00628	-0.000506	0.00542	-0.0074	0.000948	-0.00346	-0.006	0.00398		49.3	0.00266	-0.000479	0.00287	0.0011	0.00032	-0.00254	-0.00071	-0.00115
49.4	-0.00746	-0.00524	0.00127	-0.00385	0.00154	0.00365	-0.00481	-0.00194		49.4	-0.00149	-0.00226	0.01057	-0.00719	0.00387	0.0099	0.00521	0.000628
49.5	-0.00628	-0.000506	-0.00169	-0.00325	-0.00083	-0.00228	0.00111	0.00813		49.5	0.00384	-0.00522	0.00465	0.00288	0.00151	0.00338	0.000475	-0.0047
49.6	-0.00687	-0.00465	0.00186	-0.000885	-0.00735	0.00305	-0.00244	0.00457		49.6	0.00147	0.00367	0.00642	-0.00186	-0.01093	-0.00254	-0.00604	-0.00885
49.7	-0.00213	-0.00169	0.00186	-0.00207	-0.00083	0.00128	0.0017	-0.000168		49.7	-0.00386	0.00841	0.00168	-0.00246	0.00269	-0.0055	-0.00308	-0.00352
49.8	-0.000944	0.000679	-0.00465	-0.00325	0.00272	-0.00642	-0.00244	0.00457		49.8	0.00207	0.000706	0.00346	0.00347	0.00328	0.00753	-0.00249	-0.00411
49.9	-0.00213	-0.00465	0.0066	0.00622	0.00687	-0.00346	0.00407	0.00457		49.9	-0.00267	-0.00463	0.000499	-0.00305	-0.01212	0.00753	0.00166	-0.00293
50	-0.0045	-0.00169	0.00305	-0.000293	-0.0032	0.00187	0.00052	-0.00135		50	-0.00741	0.00248	0.00287	-0.00838	0.00151	-0.00669	-0.000117	0.00359
50.1	0.00143	0.00601	-0.00287	-0.00385	0.00154	0.00365	-0.00303	-0.00076		50.1	-0.00741	-0.00107	0.00228	0.00702	-0.00146	-0.00432	-0.00189	0.003
50.2	0.00202	-0.00702	-0.0011	-0.00266	-0.000237	-0.000501	0.00111	0.00576		50.2	0.00325	0.00308	-0.00602	-0.00364	-0.00264	0.01049	-0.00189	-0.0053
50.3	-0.00331	-0.00228	0.00364	-0.00622	-0.00201	0.000684	-7.27e-05	0.00398		50.3	-0.00386	-0.00522	-0.00128	0.00465	-0.00205	-0.0061	0.00462	-0.01122
50.4	0.000241	0.000679	0.00483	-0.00266	-0.000237	-0.00405	-0.00244	0.000425		50.4	0.000288	0.00189	-9.35e-05	-0.00601	0.00269	-0.00136	-0.01196	-0.00352
50.5	-0.00154	-0.00761	-0.00524	0.000299	-0.00201	-0.00287	-0.00303	-0.00135		50.5	0.00147	0.00426	-0.00187	-0.00186	0.00387	-0.000173	-0.00367	0.00951
50.6	-0.00509	-0.00465	-0.00228	0.000892	0.000948	-0.000501	-0.00126	0.00457		50.6	0.01273	0.000706	-0.01135	-0.00186	-0.00146	0.00338	0.00818	-0.00293
50.7	0.00676	-0.00288	-0.00287	-0.0074	0.000355	0.00246	0.00111	0.00161		50.7	-0.000897	0.000113	0.00998	0.00228	0.000913	-0.00669	0.00225	-0.00411
50.8	-0.00509	-0.00643	-0.00465	0.000299	0.000355	9.17e-05	-0.0054	0.00279		50.8	-0.00801	-0.00226	0.00465	-0.0066	0.00506	0.00694	0.00107	0.00537
50.9	-0.0045	-0.00406	0.00186	-0.00385	-0.0032	0.000684	-0.000665	0.00516		50.9	-0.00267	-0.00463	0.000499	-0.00127	-0.00146	0.00338	-0.00545	-0.00233
51	-0.00331	-0.00347	-0.00584	0.000299	0.00272	0.000684	-0.000665	0.00161		51	-0.00504	0.00367	-0.00483	-0.00601	-0.00205	0.0022	0.00284	-0.00174
51.1	0.00261	-0.00169	-0.00228	-0.00266	-0.000237	0.000684	0.00585	0.00516		51.1	-0.000897	-0.00877	0.00346	-0.00542	-0.00442	0.00042	-0.0013	0.003
51.2	-0.00272	-0.00465	0.00542	0.00267	-0.00201	0.00187	-0.00303	0.000425		51.2	-0.00149	-0.000479	0.00405	0.00406	0.00269	0.0016	0.00225	0.00655
51.3	-0.00331	-0.00643	8.7e-05	-0.00799	-0.00379	9.17e-05	0.00704	0.00516		51.3	0.000288	-0.00285	-0.00424	0.00169	0.00565	0.00101	0.00403	-0.0047
51.4	0.000833	-0.00347	-0.00228	-0.00622	-0.00142	0.000684	-0.00126	-0.000168		51.4	-0.00801	0.00663	0.00583	0.00169	-0.00146	0.00042	-0.00367	-0.00411
51.5	-0.00509	0.00542	-0.00524	0.00385	0.000355	0.000684	-0.00126	0.00398		51.5	0.00325	-0.000479	0.00583	0.00288	-0.00205	0.00101	-0.00308	-0.00293
51.6	-0.00509	-0.00939	0.00483	0.00148	0.0045	0.00424	-0.00185	-0.000168		51.6	0.0074	-0.00107	-0.00246	-0.00956	0.00921	-0.00373	0.00462	-0.00589
51.7	-0.000944	-0.00406	0.0066	-0.000885	-0.00379	0.00424	-0.00126	0.00161		51.7	-0.000897	0.00604	0.00109	0.00169	-0.00797	-0.00313	0.00225	-0.00352
51.8	-0.0045	8.64e-05	-0.00287	-0.00385	-0.00083	-0.00465	-0.00244	-0.00313		51.8	-0.00978	-0.00226	0.00346	0.00406	-0.00146	0.00694	0.00166	0.01188
51.9	-0.01042	-0.00939	-0.00643	-0.00148	-0.00083	0.00365	-0.000665	-0.00076		51.9	-0.000304	-0.00226	-0.00602	0.00169	-0.00975	0.00101	0.00344	-0.00174
52	-0.00272	-0.00406	-0.000505	-0.00325	-0.00083	-0.000501	-0.00185	0.00457		52	0.00147	-0.00581	-0.00365	0.00288	0.000913	-0.00669	0.00107	0.003
52.1	-0.00509	-0.00465	-0.00643	0.000299	0.00391	-0.00287	-0.00718	0.00516		52.1	-0.00978	0.00308	0.00346	-0.00482	0.00269	0.00338	-0.01078	-0.00233
52.2	-0.01279	0.00246	-0.00287	0.00385	-0.00083	0.00246	-0.01014	-0.00194		52.2	-0.00386	0.00426	0.00405	-0.00364	-0.00205	-0.00195	-0.00071	-0.000557
52.3	-0.00568	-0.00347	0.00483	-0.00148	-0.00735	0.00898	-0.00244	0.00813		52.3	0.00621	0.00248	-0.00306	0.01058	0.00447	0.00338	0.01114	-0.00352
52.4	-0.00746	0.00127	-0.00347	-0.0074	-0.00083	0.000684	-0.00303	0.0022		52.4	0.000288	-0.00403	-0.00424	0.00288	-0.000272	0.00694	-0.00723	-0.000557
52.5	-0.00983	-0.00465	-0.00169	-0.000885	-0.00142	0.00187	0.00052	-0.00372		52.5	-0.00445	0.000706	0.00168	-0.00779	0.00447	-0.00373	0.00521	0.00418
52.6	-0.0045	-0.00406	-0.00643	0.000892	0.00154	0.000684	-0.00244	-0.000168		52.6	0.00207	0.000706	0.0082	-0.00305	-0.00264	-0.00195	0.00521	-0.00233
52.7	-0.00628	-0.00524	-0.00169	-0.00148	-0.00379	0.00128	-0.00422	-0.00076		52.7	0.00147	-0.00522	0.00109	0.00406	0.000913	0.00516	0.00166	0.003
52.8	-0.00805	-0.00821	-0.00406	-0.00266	-0.0032	-0.00939	-0.01074	0.00161		52.8	0.000288	0.00485	-0.00839	-0.0066	-0.00738	0.00101	-0.00308	0.0024
52.9	-0.00746	-0.000506	-0.00169	0.00208	0.00213	-0.00228	-0.000665	-0.00194		52.9	-0.00327	-0.00226	-0.000686	-0.00246	0.000913	-0.0055	0.00581	0.00418
53	0.00261	-0.00761	-0.00287	-0.00385	-0.000237	0.01075	-0.006	0.000425		53	0.00858	-0.000479	-9.35e-05	-8.57e-05	0.00269	0.00042	-0.00782	-0.00411
53.1	0.000833	-0.01058	-0.0011	-0.00385	0.000355	0.00542	-0.0054	0.00339		53.1	0.00325	-0.00226	-0.01016	0.00525	-0.00205	0.00457	-0.01019	-0.00233
53.2	-0.00568	-0.00821	0.00483	0.000892	-0.00557	0.00483	-0.00303	-0.000168		53.2	0.000288	0.000706	-0.00128	0.00406	-0.00205	-0.000765	0.00462	0.00122
53.3	-0.00272	-0.000506	8.7e-05	-0.00681	0.00213	0.00483	0.00052	0.0022		53.3	-0.00208	-0.00285	0.00287	-0.00246	0.00151	0.00042	-0.00249	-0.00293
53.4	-0.00509	-0.00524	-0.0011	0.00504	-0.00083	-0.000501	0.00111	0.000425		53.4	-0.00741	-0.007	0.000499	-8.57e-05	0.00032	-0.00254	0.00758	-0.00293
53.5	-0.000352	-0.00465	-0.00169	0.00445	-0.00675	0.00305	-0.00481	-0.000168		53.5	-0.000897	0.0013	0.000499	-0.00423	0.0021	-0.00432	-0.00071	0.0024
53.6	0.000833	-0.01058	-0.00406	-0.00444	-0.00794	0.00542	0.0017	0.00635		53.6	0.00207	-0.01173	-0.00306	-0.00127	-0.00205	0.01701	0.000475	-0.00174
53.7	-0.000944	-0.00347	-0.00169	-0.00148	-0.00498	-0.00939	-7.27e-05	0.0022		53.7	-0.000897	-0.0064	0.00642	0.00584	0.00032	0.00042	0.00995	0.000628
53.8	0.00261	-0.00465	0.00483	-0.00266	0.000355	0.00128	-0.00244	-0.00135		53.8	-0.00208	0.01078	0.00109	-8.57e-05	-0.00797	0.00101	-0.00367	0.00122
53.9	-0.00687	-0.00228	0.00364	0.000892	-0.00616	0.00365	-0.00185	0.000425		53.9	-0.00267	0.00426	-0.00365	-0.00423	0.00032	0.00338	0.00284	0.0024
54	-0.00687	8.64e-05	-0.00287	-0.00266	-0.000237	-0.00287	-7.27e-05	0.00339		54	-0.00267	-0.00463	0.00109	-0.00719	0.00387	0.0022	0.00403	0.00122
54.1	-0.000352	-0.00643	-0.00761	0.000299	0.00213	0.00305	0.00052	-0.00135		54.1	-0.00267	0.00189	-0.00483	-0.00186	0.00565	-0.00313	0.00107	-0.00233
54.2	-0.00983	-0.00821	-0.00643	-0.000885	-0.00735	-0.00346	-7.27e-05	-0.00194		54.2	-0.00445	-0.0064	-0.000686	0.00228	0.00269	-0.000173	-0.00189	-0.00115
54.3	-0.00864	-0.00347	0.00127	-0.00385	-0.00438	0.00246	-0.00718	0.00398		54.3	-0.00978	0.000706	0.000499	0.00288	-0.00916	-0.00432	-0.00249	-0.00233
54.4	-0.00272	-0.00643	0.00127	0.00622	-0.00675	0.00424	0.00407	-0.00491		54.4	-0.000897	-0.00344	0.00109	0.00288	0.00447	0.00575	-0.00308	0.00418
54.5	-0.000944	8.64e-05	0.00246	-0.00325	0.00213	-0.000501	0.00407	-0.000168		54.5	0.00266	0.000113	-0.000686	-0.00423	0.00151	0.00338	0.00403	3.53e-05
54.6	-0.00391	-0.00998	-0.00465	0.00563	0.00154	0.00424	-0.00303	0.000425		54.6	-0.00564	-0.00166	0.00109	-0.00186	-0.00975	0.0099	-0.00486	-0.00174
54.7	-0.00924	-0.00702	0.00364	0.00563	-0.01031	0.00246	-0.00777	0.00161		54.7	-0.00682	-0.0064	0.00346	0.00169	-0.00383	-0.00136	0.00877	-0.00233
54.8	-0.00509	-0.00584	-0.00287	-0.00385	-0.00142	0.00602	-0.00244	-0.00135		54.8	-0.000897	0.00781	-9.35e-05	0.00406	0.00861	-0.000765	0.00344	0.00596
54.9	0.000833	-0.00288	0.00305	-0.000885	-0.00261	-0.00109	-0.00303	0.0022		54.9	-0.00623	0.00663	-0.00661	-0.00423	0.00565	0.00753	0.00107	0.0024
55	0.00676	0.00186	-0.00643	-0.00503	-0.00735	0.00305	-0.00185	0.000425		55	0.00503	-0.00936	0.00109	0.00169	-0.00442	-0.00195	0.0064	-0.00174
55.1	0.000833	-0.01117	0.00246	0.000299	-0.00379	0.00898	0.00052	-0.00135		55.1	0.00266	-0.00107	-0.00661	-0.00127	0.00032	-0.00669	-0.00071	0.00833
55.2	0.000241	-0.00643	-0.00169	0.00741	-0.00438	-0.00228	-0.00126	-0.000168		55.2	-0.00801	0.000113	-0.00306	0.00643	0.0021	0.00338	-0.00545	0.00418
55.3	-0.00272	-0.00406	0.00483	0.00445	-0.00735	0.00246	0.00407	0.00279		55.3	-0.00149	-0.01292	-0.00483	0.00288	-0.000864	0.00634	-0.00308	-0.0053
55.4	-0.00272	-0.00347	-0.00643	-0.00266	-0.00438	0.00602	-0.00363	-0.00254		55.4	0.000288	-0.00344	-9.35e-05	-0.000678	-0.00383	0.0022	0.00284	-0.00411
55.5	-0.00272	-0.00939	0.00246	-0.00681	-0.00438	9.17e-05	-0.00185	-0.00313		55.5	-0.00386	-0.01233	0.00228	0.0011	0.00269	0.00042	0.00166	0.00359
55.6	0.00202	-0.00702	0.00186	0.000892	-0.00083	-0.000501	0.00052	-0.000168		55.6	0.00266	-0.0064	-0.00306	-0.00364	0.0021	0.00338	0.0064	0.00477
55.7	-0.000944	-0.00761	0.000679	-0.000293	0.000948	0.00305	0.00348	0.0022		55.7	-0.00682	-0.00107	-0.00483	0.0011	-0.00738	-0.000765	-0.00663	0.003
55.8	-0.00509	-0.0011	-0.0011	0.00445	-0.00853	-0.00346	0.0023	0.00339		55.8	0.000288	-0.00285	0.00228	0.0011	-0.00323	-0.00136	-0.00426	-0.00233
55.9	-0.000352	-0.01295	-0.00228	0.000892	-0.00083	0.00542	-0.00481	-0.00135		55.9	-0.000897	-0.01707	-0.000686	-0.00305	0.000913	0.00694	0.00521	-0.00115
56	0.0038	0.00127	0.00246	0.00267	-0.00675	0.00661	-0.00185	-0.00313		56	-0.00445	-0.00107	0.00168	0.00643	0.00565	0.00871	0.00758	-0.00115
56.1	-0.00746	-0.00761	-0.00524	0.00208	-0.0032	0.00424	-0.00363	-0.00076		56.1	-0.00564	-0.00285	0.00109	-0.00186	-0.00916	0.00338	0.00166	0.003
56.2	-0.00746	-0.00761	-0.000505	0.000892	-0.0032	0.00246	0.00348	-0.000168		56.2	-0.00919	-0.00344	0.00346	0.0011	-0.00442	0.00101	-0.00189	-0.00174
56.3	-0.00924	-0.00288	8.7e-05	0.00445	-0.00379	-0.00169	0.00052	-0.00194		56.3	0.00621	0.00367	-0.00483	0.0011	0.01217	-0.00728	-0.00426	-0.00648
56.4	-0.00272	-0.00524	0.00364	-0.00503	-0.00735	0.00483	0.00111	-0.00194		56.4	0.00917	0.00426	-0.00779	0.0011	-0.000864	0.00753	-0.00071	0.00122
56.5	-0.00924	-0.00761	8.7e-05	0.00208	-0.00498	0.00187	0.00052	0.0022		56.5	-0.00741	-0.00403	0.00583	0.000507	-0.00264	0.00279	-0.00545	0.00122
56.6	-0.00391	-0.0088	-0.00228	0.00622	-0.0032	-0.00109	0.0023	-0.00135		56.6	-0.00445	-0.0141	-0.000686	0.00525	-0.00146	0.00101	-0.00426	0.00418
56.7	-0.00568	-0.00288	-0.00465	0.000299	-0.00201	0.00187	-7.27e-05	0.00161		56.7	-0.00623	-0.00285	0.00346	0.00228	0.00802	-0.0061	0.00344	0.00714
56.8	0.00143	0.00186	0.00364	-0.00385	-0.000237	0.00305	-0.00126	-0.00135		56.8	0.00147	0.000113	0.00346	0.00347	0.00269	0.00753	0.0064	0.00537
56.9	-0.00805	-0.00169	-0.00584	0.000892	-0.00201	0.00424	-7.27e-05	-0.000168		56.9	0.00147	-0.00285	-9.35e-05	-0.00482	0.00387	-0.00373	0.00877	-0.00174
57	-0.00331	-0.00465	0.00364	-0.00207	-0.00379	-0.00346	0.00822	-0.00313		57	-0.00386	-0.00463	-0.00661	0.0011	0.0021	-0.000173	0.00166	-0.00115
57.1	-0.00154	-0.00643	0.00779	-0.00562	-0.00438	-0.00346	-0.00126	-0.00135		57.1	-0.00386	0.00426	0.00168	0.0011	0.00151	0.00871	-0.00545	-0.00944
57.2	-0.00568	-0.00584	-0.00169	0.008	-0.00083	0.00483	-0.00303	0.0022		57.2	0.00147	-0.00403	0.00465	-0.00364	-0.000272	-0.00136	-0.00308	-0.00352
57.3	0.00202	-0.01176	-0.0011	0.00267	0.00154	-0.00524	-0.00185	0.00161		57.3	-0.00267	0.00426	-0.00779	-0.00127	-0.00797	0.00516	0.00344	-0.00174
57.4	-0.00924	-0.0011	-0.00169	0.00208	-0.01208	0.00128	-7.27e-05	-0.00905		57.4	-0.00149	-0.00166	-0.00187	0.01176	-0.000272	0.00101	-0.000117	0.00655
57.5	-0.00805	-0.00406	0.000679	0.00741	-0.00201	0.00542	0.00348	-0.00076		57.5	0.01391	-0.000479	0.00405	0.00169	0.0021	0.00101	-0.00604	-0.00707
57.6	-0.00687	8.64e-05	0.000679	0.000299	0.00391	0.00838	-0.000665	0.00339		57.6	-0.00919	-0.00936	-0.00187	-0.00246	0.00032	0.00279	0.00403	-0.00233
57.7	-0.00628	-0.01117	-0.000505	-0.00266	-0.00557	-0.000501	0.0023	-0.00194		57.7	-0.00564	-0.00166	0.00109	0.00288	-0.000272	0.00338	0.00225	-0.00115
57.8	-0.01101	-0.00584	0.00305	0.000299	-0.00142	-0.00346	0.00467	0.000425		57.8	0.01332	-0.00166	0.00465	0.00939	-0.0062	0.00042	-0.0013	0.00477
57.9	-0.01042	-0.00643	0.00186	0.008	-0.0032	0.00246	-0.00126	0.00398		57.9	0.00799	-0.00285	-0.00187	-0.00305	0.00506	0.0016	0.00166	0.00477
58	-0.00568	-0.00406	0.00127	-0.00385	-0.00735	0.00661	0.00289	-0.0055		58	-0.00267	-0.00107	-0.0072	-0.00186	0.00921	-0.00254	-0.00308	0.00359
58.1	-0.00154	-0.00406	0.00601	0.00148	-0.00201	9.17e-05	-0.00422	-0.00728		58.1	-0.00919	-0.00285	0.00287	-0.00246	-0.00323	-0.0061	-0.00486	-0.00352
58.2	-0.00628	-0.0088	-0.00347	0.00622	-0.00142	0.00246	0.00526	-0.00194		58.2	0.00207	-0.00759	0.00465	0.00406	0.00387	-0.0055	-0.000117	0.00655
58.3	-0.00983	-0.00998	0.00127	-0.00385	-0.01149	0.000684	-0.00126	-0.00076		58.3	-0.00267	0.000706	-0.00187	0.00169	-0.000864	0.00338	-0.00189	-0.00352
58.4	-0.00805	-0.01117	8.7e-05	0.00326	-0.00794	0.00542	-0.00126	0.00279		58.4	-0.00445	0.00189	-0.00424	-0.00838	0.00447	0.00694	-0.0013	-0.0053
58.5	-0.00628	-0.00524	0.00127	0.00148	-0.0032	0.000684	0.00407	0.00161		58.5	-0.00564	-0.01173	0.00405	0.00525	-0.00146	-0.00254	-0.00426	0.00714
58.6	-0.01161	0.00246	0.00127	0.00208	-0.00083	0.00187	0.0017	-0.00372		58.6	0.000288	0.00485	-0.00483	0.00525	0.00269	-0.000765	-0.00723	0.00537
58.7	-0.00924	-0.00998	0.00127	0.00563	-0.00083	0.00365	0.00052	-0.00491		58.7	-0.00149	0.00663	0.00405	-0.000678	0.00387	0.00575	0.00344	0.00418
58.8	-0.01042	0.00246	-0.000505	-0.00325	-0.00794	0.00305	-7.27e-05	-0.00313		58.8	0.000288	-0.00344	0.00109	0.00406	0.00032	0.00101	-0.00604	-0.00352
58.9	-0.01161	-0.00702	8.7e-05	0.000892	-0.0032	-0.00109	0.0017	0.00102		58.9	-0.01037	-0.0064	-0.00128	-0.00364	0.00387	-0.00313	-0.00071	0.0024
59	-0.00983	-0.00465	0.00305	0.000892	-0.00201	-0.00287	0.00704	-0.00313		59	0.000288	0.000706	-0.00542	-0.00719	-0.00501	0.00575	0.00225	-0.00233
59.1	-0.00628	-0.0088	0.00364	0.00148	0.00154	0.00365	0.00526	0.00161		59.1	-0.00149	-0.00285	-0.000686	0.0011	-0.000864	-0.00787	0.00166	0.00537
59.2	-0.01042	-0.01058	-0.0011	0.00385	-0.00557	-0.00583	-0.00363	-0.00313		59.2	0.0068	-0.00581	0.00287	0.00643	0.01394	-0.00136	-0.00071	0.00359
59.3	-0.00568	-0.00465	-0.00169	0.00563	-0.00201	9.17e-05	-0.0054	-0.00609		59.3	-0.00386	-0.00403	0.00287	-8.57e-05	-0.00442	0.00931	-0.00189	-0.00115
59.4	-0.00628	-0.00169	0.00483	0.00682	-0.0032	-0.00169	0.00289	0.00516		59.4	-0.00327	0.00308	-0.00483	-8.57e-05	-0.000864	0.00101	-0.00426	0.00122
59.5	-0.01101	-0.000506	0.00186	0.00682	-0.00201	0.00187	0.01	0.0022		59.5	-0.00623	-0.000479	0.00168	0.0011	0.00328	-0.00313	-0.00071	-0.00411
59.6	-0.00746	8.64e-05	0.00305	0.000892	-0.000237	9.17e-05	-0.00363	-0.00491		59.6	-0.00978	0.00308	0.00524	0.0011	0.00151	0.00694	0.000475	0.00596
59.7	-0.00864	8.64e-05	0.00305	-0.0074	-0.01031	9.17e-05	0.00467	0.00279		59.7	-0.00978	0.00367	-0.00779	-0.000678	0.0021	0.00457	0.00166	0.01188
59.8	-0.00864	0.00246	0.00186	0.000299	-0.000237	-0.00583	0.00407	0.00279		59.8	0.000288	-0.00344	-9.35e-05	0.0011	0.00802	-0.00136	-0.00367	-0.00648
59.9	-0.00805	-0.00761	0.00127	-0.000293	0.000355	-0.00346	0.00052	-0.00313		59.9	0.00621	0.00248	0.00405	-0.00364	0.00269	0.0016	0.00699	0.00477
60	-0.00924	-0.00347	-0.00347	0.00622	0.00391	9.17e-05	0.00881	0.000425		60	-0.00919	-0.007	-0.00128	-0.00423	-0.00501	0.0099	-0.00308	0.000628
60.1	-0.01635	-0.00228	0.00423	0.00326	-0.0032	0.000684	-0.0054	-0.00254		60.1	-0.000304	0.00426	-9.35e-05	-0.00423	0.00387	-0.00787	-0.00367	0.003
60.2	-0.0045	-0.00761	0.00186	-0.000885	-0.00557	0.00246	0.0023	-0.00313		60.2	-0.00741	0.00248	-0.00424	0.00643	0.00743	-0.00254	-0.00545	0.00833
60.3	-0.00924	-0.00288	0.000679	0.00326	0.00213	-0.00346	0.00585	-0.00313		60.3	-0.00623	-0.01173	-0.00779	-0.000678	0.00624	-0.00432	0.00284	-0.000557
60.4	-0.00983	0.00246	0.00305	0.00563	0.0045	9.17e-05	0.00348	-0.000168		60.4	-0.00386	-0.00166	-0.00306	-0.00542	-0.000272	-0.00432	0.000475	-0.00115
60.5	-0.00687	-0.00406	0.00127	0.00267	-0.00142	-0.00228	0.00467	-0.00313		60.5	-0.00445	0.00189	0.00228	-0.00127	0.000913	-0.00136	-0.00071	0.0024
60.6	-0.00864	-0.00169	0.000679	0.000892	-0.00557	-0.00109	-0.000665	0.00161		60.6	-0.00208	-0.000479	0.00346	-0.00423	0.0021	0.00101	-0.00841	0.00596
60.7	-0.01042	-0.00821	0.00897	-0.00148	0.0045	9.17e-05	0.00644	0.0022		60.7	-0.01037	-0.00463	-9.35e-05	0.0088	0.00447	0.00042	-0.00308	-0.00115
60.8	-0.01516	-0.00169	0.00364	0.00682	-0.00438	0.00187	0.0023	-0.00135		60.8	0.00147	-0.000479	-0.00306	0.00998	-0.00442	-0.00254	0.00521	0.00477
60.9	-0.00983	-0.00465	-0.0011	0.00148	-0.00201	-0.00169	0.00111	-0.00431		60.9	0.00266	-0.00818	-0.00128	-0.00897	0.00032	0.00457	0.00344	-0.00352
61	-0.0045	-0.00169	-0.0011	0.000299	-0.0032	-0.00346	-0.00126	-0.000168		61	0.00384	-0.00226	0.00109	-0.00423	-0.00205	0.0022	-0.000117	0.00655
61.1	-0.00805	0.00246	0.00542	0.00504	-0.0032	-0.00405	0.00763	-0.000168		61.1	-0.00741	0.00248	0.00524	-0.000678	-0.000864	-0.01143	-0.000117	0.0024
61.2	-0.00924	0.00186	0.00364	-0.00325	0.00391	9.17e-05	-0.000665	0.000425		61.2	-0.000897	0.0013	0.00287	0.00465	0.00447	0.00457	-0.00604	0.0024
61.3	-0.01398	-0.00465	0.00127	0.00385	-0.00201	-0.00169	0.00407	-0.000168		61.3	-0.00564	-0.00285	-0.01253	-8.57e-05	0.0021	-0.00254	0.00284	-0.0053
61.4	-0.0045	0.00423	-0.000505	0.008	0.000948	-0.00228	0.0017	-0.00135		61.4	-0.000304	-0.00344	0.00168	0.00525	0.00802	-0.00195	-0.00071	-0.00115
61.5	-0.00272	-0.00465	0.00127	0.00267	0.000355	-0.00169	0.00644	-0.00194		61.5	0.00088	0.00544	-0.000686	0.00406	0.00624	0.00931	-0.00604	0.000628
61.6	-0.00628	-0.00288	0.00127	-0.00385	-0.00735	-0.00109	-0.00244	-0.00194		61.6	0.00443	-0.00403	0.00168	0.0011	0.000913	-0.00432	-0.000117	0.00122
61.7	-0.01338	-0.00524	-0.00702	0.00563	-0.00379	-0.00109	0.00822	0.00339		61.7	0.00088	-0.0064	0.00583	0.00228	0.00565	-0.0061	0.000475	0.01011
61.8	-0.00746	0.00127	0.01075	0.00563	-0.00142	-0.00405	0.00585	-0.00076		61.8	0.00621	0.0013	0.00642	0.0011	0.00151	0.00457	0.00107	-0.000557
61.9	-0.00509	-0.00406	0.00127	0.00741	0.00154	-0.00761	0.00407	-0.00194		61.9	-0.00445	0.00544	-0.00542	-0.00364	-0.00146	0.00042	-0.00308	-0.00707
62	-0.00924	-0.0011	0.00246	0.00563	0.000355	-0.00287	0.00467	0.00339		62	-0.00682	-0.00522	-9.35e-05	0.00169	0.00684	0.00101	0.00166	0.00714
62.1	-0.01101	8.64e-05	0.00305	-0.000293	-0.00261	-0.00109	0.00111	-0.00431		62.1	-0.000304	0.0013	0.00879	0.000507	-0.0056	-0.00254	-0.01019	0.00714
62.2	-0.00983	-0.00465	-0.00524	-0.00385	0.00154	-0.00346	0.00289	0.00576		62.2	0.01154	0.000113	0.00346	-0.00186	0.00269	-0.00313	0.00284	0.00477
62.3	-0.00391	0.00127	0.0072	0.00148	-0.00853	-0.00109	-0.000665	0.00339		62.3	-0.00741	0.00248	-0.000686	-0.00186	0.00684	-0.00136	0.00166	-0.00174
62.4	-0.00805	-0.00702	0.00127	0.00326	0.000948	-0.00228	-7.27e-05	-0.00135		62.4	0.000288	0.0013	0.00346	0.00228	0.00565	0.00871	-0.00071	0.00596
62.5	-0.01279	-0.00761	0.00186	0.00622	-0.00912	-0.00287	0.00348	-0.00135		62.5	-0.00564	0.000706	-0.00128	0.000507	-0.00264	-0.00313	-0.00071	0.003
62.6	-0.00746	-0.00288	-0.00169	0.00385	-0.0032	-0.00879	-0.000665	-0.000168		62.6	-0.00741	0.00959	-0.00187	-0.0066	-0.000864	-0.0061	-0.0013	0.00122
62.7	-0.00628	-0.00169	0.00186	-0.00207	0.00391	-0.00169	0.00111	-0.000168		62.7	0.00443	0.000113	-0.00187	0.00169	-0.00264	-0.000173	-0.01374	-0.00174
62.8	-0.000944	-0.00288	0.00897	-0.000885	-0.00675	-0.00287	0.00348	0.0022		62.8	-0.000304	-0.007	0.00465	0.00347	0.00269	0.00457	-0.01552	-0.00174
62.9	-0.00983	-0.0011	-0.00347	0.00504	0.000948	0.00128	-7.27e-05	0.0022		62.9	0.00266	-0.000479	0.00701	0.00169	0.00743	-0.00373	0.00581	0.00537
63	-0.00924	0.00601	0.00246	0.00385	-0.00142	-0.00109	0.00407	0.00102		63	0.000288	0.00248	-0.00839	-8.57e-05	0.00506	-0.00254	0.00699	0.003
63.1	-0.00568	-0.0088	-0.000505	0.00208	-0.00083	-0.00405	0.00348	0.0022		63.1	-0.00741	0.00189	0.00465	0.00288	-0.00146	-0.00195	-0.00249	0.00477
63.2	-0.0045	-0.00406	0.00838	0.00208	-0.00142	-0.00879	0.00763	-0.00254		63.2	-0.00445	0.000706	0.00465	0.00406	0.00684	0.00516	-0.00723	0.00833
63.3	-0.00864	-0.0011	0.00246	0.00326	-0.00083	-0.00702	-0.00126	0.00161		63.3	0.00325	0.00189	0.00405	0.00821	0.00447	-0.00254	-0.00426	-0.00411
63.4	-0.0045	0.00186	0.00186	0.00208	0.00213	-0.0082	0.0017	0.00576		63.4	0.00088	0.00841	-0.00424	-0.00186	-0.000272	0.0022	0.00344	-0.0053
63.5	-0.00509	0.000679	-0.00228	-0.000885	-0.00498	0.00424	0.00644	0.00279		63.5	-0.000897	-0.00344	0.00701	-0.00127	-0.000864	-0.00965	-0.0013	-0.0053
63.6	-0.00864	-0.00288	0.00364	-0.00207	-0.00735	0.00246	0.0023	-0.00135		63.6	0.00147	-0.000479	0.00228	0.00347	0.0021	-0.00906	-0.00308	-0.00411
63.7	-0.0045	0.00186	0.00838	0.00622	0.00154	-0.00583	-0.00185	-0.00194		63.7	-0.00386	0.01078	0.00228	0.000507	-0.000864	0.00694	0.00699	0.00655
63.8	-0.00687	8.64e-05	0.00483	-0.00266	-0.00794	-0.00109	0.00585	-0.00372		63.8	0.0074	-0.00522	0.00524	-0.000678	0.00032	-0.00136	-0.00486	0.00477
63.9	0.000833	-0.00702	0.00364	0.00148	-0.00794	-0.00287	-0.000665	-0.00313		63.9	-0.00623	-0.00877	-0.00365	-0.00305	-0.00146	0.00101	-0.0096	0.00477
64	-0.00924	-0.00169	0.00483	0.00563	-0.00142	0.00246	-0.000665	-0.00668		64	-0.00208	0.00189	0.00524	-0.00127	0.00743	-0.00669	-0.0013	0.00122
64.1	-0.00983	-0.00643	0.00127	-0.00148	-0.0032	-0.00405	0.0017	0.00398		64.1	-0.000304	-0.00403	0.00346	0.0011	-0.00146	0.00575	0.01114	0.00122
64.2	-0.00983	0.00246	0.00483	0.00504	-0.00083	-0.00524	-7.27e-05	-0.00491		64.2	-0.000897	0.00248	-0.00128	-0.00186	0.000913	-0.000765	-0.00723	-0.00885
64.3	-0.01101	-0.00406	-0.0011	0.00859	0.00213	0.00542	0.00052	0.00279		64.3	-0.00801	-0.00936	0.00701	0.00643	0.00743	-0.00432	-0.00545	0.00477
64.4	-0.01101	0.00127	0.00779	0.000892	-0.00261	-0.01057	0.00052	-0.00194		64.4	0.00503	0.00959	0.00287	0.00762	-0.000864	-0.0061	-0.00249	-0.00293
64.5	-0.00983	0.00127	0.00127	0.00741	-0.00261	-0.00287	-0.00244	-0.00135		64.5	-0.000897	-0.00166	-0.00424	-0.00305	-0.00323	-0.00136	-0.00545	-0.000557
64.6	-0.00687	-0.00288	0.00483	-0.00681	0.00391	9.17e-05	0.00763	0.00576		64.6	0.00147	-0.00166	-0.00246	-0.00601	0.00506	0.01049	-0.00249	0.00477
64.7	-0.00628	8.64e-05	0.00779	-0.000293	0.000948	-0.00405	0.0017	-0.00491		64.7	-0.01274	0.000113	0.00701	-0.000678	0.00328	-0.00491	0.00344	-0.00589
64.8	0.000833	-0.00288	0.00364	0.00563	-0.00438	-0.00109	0.00348	-0.00254		64.8	-0.00208	0.00367	0.00465	0.00169	0.00624	-0.0055	-0.00249	0.00833
64.9	-0.00983	0.00305	-0.0011	0.00208	-0.00201	-0.00109	0.0017	0.000425		64.9	0.00088	-0.00403	0.000499	-8.57e-05	0.00624	-0.00195	0.00344	0.00714
65	-0.00983	0.00127	-0.000505	0.00385	0.00272	-0.00465	0.00704	0.00279		65	0.00503	0.00485	0.01057	0.00288	0.00447	0.00338	0.00403	-0.00648
65.1	-0.00568	-0.00406	-0.00524	-0.00503	0.00154	-0.00228	0.00111	-0.000168		65.1	0.00266	-0.00107	-0.00187	0.00702	0.00269	0.0016	-0.01078	-0.00589
65.2	-0.00687	-0.00465	0.00423	0.00148	0.0045	9.17e-05	-0.000665	0.00339		65.2	-0.01037	-0.00522	0.00287	0.00465	0.00506	-0.00669	-0.00604	0.00359
65.3	-0.000944	0.00127	0.01016	0.00563	0.00628	0.000684	-0.000665	0.00339		65.3	0.00088	0.000706	-0.00187	-8.57e-05	0.00151	0.00279	-0.0096	0.00596
65.4	-0.00272	8.64e-05	-0.0011	-0.000293	0.00391	-0.00583	0.00111	0.00279		65.4	-0.00445	-0.00344	0.00465	0.00465	0.00387	-0.00195	-0.00486	0.0024
65.5	-0.00687	-0.00288	0.00305	0.00208	-0.0032	-0.00287	0.00348	0.000425		65.5	-0.00445	-0.00107	0.00168	-0.00127	0.00802	0.00575	0.00403	-0.00174
65.6	-0.0045	-0.00406	0.00364	-0.00266	-0.0032	0.000684	0.00407	0.00457		65.6	-0.000897	0.00426	-0.00187	0.00347	-0.00146	-0.000173	0.00166	0.01011
65.7	-0.00154	0.00246	0.00186	-0.00325	-0.00853	-0.00169	-0.00363	0.00102		65.7	-0.00919	0.000706	0.00524	-0.00305	-0.00857	-0.00432	0.00166	-0.0053
65.8	-0.00391	0.00364	0.00186	0.00148	-0.000237	-0.00346	0.0017	-0.000168		65.8	-0.00327	-0.00285	0.00287	-0.00423	0.00684	-0.0055	0.00521	-0.0053
65.9	-0.00509	-0.00347	0.00305	0.00445	0.000948	-0.00405	0.00289	0.00576		65.9	-0.00327	0.01078	-9.35e-05	-0.00246	0.00269	-0.0061	-0.00071	-0.00411
66	0.00202	0.00364	0.0066	0.00267	0.000355	-0.00109	0.00111	0.0022		66	-0.00682	0.00189	0.00346	-0.01075	0.00269	0.00397	-0.00308	-0.00233
66.1	-0.00568	-0.00465	0.00305	-0.00148	-0.00142	0.00128	0.00407	-0.00431		66.1	0.00384	-0.00107	0.000499	0.00228	0.00387	0.00042	-0.00071	0.0024
66.2	0.00439	0.000679	0.00305	-0.00266	-0.00083	-0.00702	-0.00422	0.00398		66.2	-0.00386	-0.00877	-0.0072	0.00939	0.00743	-0.00254	-0.000117	0.00833
66.3	-0.00391	0.00186	0.0072	0.000892	-0.00261	-0.00702	0.0023	0.00753		66.3	-0.00208	0.0013	0.00642	-0.00423	-0.00679	0.0016	-0.00663	0.00181
66.4	-0.00391	-0.00643	0.00246	-0.00266	-0.00616	-0.00405	0.00526	-0.00076		66.4	0.0074	0.00189	0.00642	-0.00246	-0.00501	-0.00373	-0.00486	-0.00707
66.5	0.00261	-0.00524	0.00127	-0.000885	0.00509	0.00542	0.00763	0.00635		66.5	-0.0086	-0.00107	0.00642	-0.00305	0.000913	0.0016	-0.0013	-0.00233
66.6	0.0032	0.00186	-0.000505	-0.000885	-0.00438	-0.0082	0.00052	0.00457		66.6	-0.0086	0.00544	-0.000686	0.00347	-0.0056	0.00397	-0.00189	-0.00944
66.7	0.000241	0.00542	-0.00228	0.00208	0.00391	0.00128	-0.00303	0.00398		66.7	0.00562	-0.007	-0.00187	-0.00127	0.00151	0.00279	-0.00723	0.00596
66.8	-0.0122	-0.000506	0.00542	-0.00207	-0.00261	-0.00405	-0.00363	-0.000168		66.8	-0.00327	0.000113	0.000499	0.00465	0.00861	-0.00432	-0.00723	0.00655
66.9	-0.0122	0.00246	0.00838	-0.00207	0.00332	-0.00169	-7.27e-05	0.00753		66.9	-0.00682	-0.00403	-0.00187	-0.00719	-0.00738	-0.00432	-0.0013	0.000628
67	-0.00568	0.00246	0.00127	0.00208	-0.00201	-0.00702	0.00704	0.00102		67	-0.00741	0.00544	0.00405	-0.0066	-0.00383	-0.00195	0.00225	0.00418
67.1	-0.01753	0.00305	0.00127	-0.00385	-0.0032	0.00483	0.00111	-0.00491		67.1	-0.000897	-0.00285	-0.000686	0.0011	0.00269	-0.00136	-0.0096	-0.00233
67.2	-0.00983	0.00186	-0.0011	0.000299	-0.0032	-0.00287	0.00111	-0.00431		67.2	-0.00149	-0.00463	0.00346	-0.00364	0.00269	-0.00313	-0.0013	-0.01122
67.3	-0.01161	0.00483	8.7e-05	0.00148	0.00391	-0.00169	0.00052	-0.000168		67.3	-0.00208	0.00367	0.00998	-0.00186	0.00151	0.01108	0.00521	-0.00115
67.4	-0.00568	-0.00169	0.00423	-0.00266	-0.000237	-0.00524	0.0023	0.00161		67.4	-0.00386	-0.00403	-0.00306	0.00702	-0.00323	-0.00195	-0.00426	-0.00648
67.5	-0.01042	-0.00169	0.00127	-0.00325	-0.00794	-0.00109	0.0017	0.0022		67.5	-0.000304	0.00426	-0.00306	0.00525	-0.00205	-0.00847	-0.00782	0.000628
67.6	-0.00805	8.64e-05	0.00483	-0.00325	0.0045	0.00128	-0.00126	-0.00905		67.6	-0.00623	-0.01114	0.00465	-0.000678	-0.000864	-0.00195	-0.00426	-0.00767
67.7	-0.01457	0.00246	0.00305	0.00563	-0.00379	-0.00228	0.0023	0.0022		67.7	-0.000304	0.00308	-0.00483	0.00228	-0.00442	0.00042	0.00344	0.003
67.8	-0.00687	-0.00288	0.00246	-0.00266	0.000355	-0.00405	0.00052	0.00813		67.8	-0.000897	0.00485	0.00287	-0.00305	0.00387	0.00575	-0.00486	0.003
67.9	-0.01279	0.00127	0.00127	0.00504	-0.00142	-0.00109	0.00644	0.00457		67.9	0.00562	-0.00522	0.01649	-0.00305	0.00447	-0.00254	-0.00782	-0.00115
68	-0.00746	-0.00347	-0.000505	0.00267	-0.00142	0.000684	0.00407	0.00457		68	0.00325	0.00426	-9.35e-05	-0.00305	-0.00264	-0.00195	0.00344	-0.00648
68.1	-0.00983	-0.00524	0.0066	-0.0074	-0.000237	0.00483	-0.00481	0.0022		68.1	-0.00445	0.00604	-0.00187	-0.00838	0.00032	-0.00254	0.000475	-0.00174
68.2	-0.00924	0.00186	0.00246	-0.00622	-0.00142	-0.00169	-0.000665	-0.000168		68.2	0.00503	0.0013	0.00109	-0.00542	0.01098	0.00575	-0.00426	-0.00293
68.3	-0.00805	0.000679	0.00364	0.00208	-0.00498	-0.00228	-0.00303	0.00457		68.3	-0.0086	0.0013	-0.00365	0.0011	-0.00501	-0.0061	-0.000117	0.00359
68.4	-0.000944	0.00483	0.00186	-0.000293	0.00154	0.00128	0.0017	0.00516		68.4	0.00325	-0.007	0.00583	0.00584	-0.00205	-0.00254	-0.00249	0.000628
68.5	-0.00509	-0.00406	-0.00524	-0.00148	0.00213	-0.00642	0.0023	-0.00076		68.5	0.00384	-0.00344	0.00465	-0.00186	0.0021	0.00694	0.00581	-0.0047
68.6	-0.00272	0.00127	0.00483	-0.000293	-0.00083	-0.00346	-0.00126	0.0022		68.6	-0.00623	0.00485	0.00109	0.00288	-0.00323	-0.00195	-0.00249	3.53e-05
68.7	0.0032	-0.00406	0.00246	0.000299	0.00391	-0.000501	0.0023	0.00516		68.7	-0.00267	-0.00581	-0.01135	-0.00186	-0.00323	-0.00195	-0.00782	-0.00174
68.8	-0.00331	-0.0011	-0.000505	0.00385	-0.00498	-0.00169	0.00052	0.00516		68.8	0.00858	-0.00226	0.01235	-0.00423	0.00387	-0.000765	-0.000117	-0.00115
68.9	-0.00568	-0.0011	-0.00406	-0.00325	-0.0032	-0.00405	-0.0054	0.00398		68.9	-0.00327	0.00426	0.00938	-0.0066	0.01039	0.00457	0.00462	-0.000557
69	-0.00272	8.64e-05	-0.00406	-0.00385	0.00509	0.00305	0.00111	-0.00313		69	-0.00386	-0.007	-0.00306	0.00762	0.000913	0.00397	0.0064	-0.00115
69.1	0.00676	-0.00347	-0.00406	-0.00148	-0.00201	-0.000501	0.00526	0.0022		69.1	0.00147	0.000113	0.00109	0.0011	0.0021	0.00812	-0.00071	0.00122
69.2	0.00143	0.00186	0.00483	-0.0074	-0.00853	0.00305	-0.00303	0.00339		69.2	-0.00386	0.00189	0.00583	-0.00246	-0.00442	-0.00432	0.00166	0.003
69.3	0.00261	0.00483	0.00364	-0.00562	0.000948	-0.00524	-0.00126	0.00457		69.3	0.00266	-0.007	0.00287	-0.00305	0.00269	-0.00373	-0.00071	-0.000557
69.4	-0.000944	-0.000506	-0.000505	0.00326	0.0045	-0.00228	0.0023	0.00398		69.4	-0.000897	0.0013	0.00109	0.00998	0.0098	0.00101	0.00818	-0.0047
69.5	0.00261	0.00364	0.00186	-0.00385	-0.00498	0.00305	-0.000665	0.00398		69.5	-0.00801	0.0013	-0.00246	-0.00127	0.00151	-0.00136	-0.00426	-0.00115
69.6	-0.0122	-0.000506	0.00127	-0.00148	-0.00438	-0.00109	-0.00126	0.00161		69.6	-0.00208	0.000706	0.00228	-0.00364	-0.00797	0.00338	-0.009	-0.00707
69.7	0.0038	-0.00406	0.00246	0.000892	-0.00142	0.00483	0.00407	-0.00135		69.7	-0.00504	-0.0064	-0.00187	-0.01016	-0.00383	-0.00195	-0.00189	0.00477
69.8	0.000833	-0.00406	0.00127	0.00267	-0.000237	-0.00583	0.00052	0.00339		69.8	-0.00623	-0.00403	0.00642	-0.00423	-0.00264	0.00101	-0.000117	0.00359
69.9	-0.00509	-0.000506	-0.00406	-0.00977	-0.00142	-0.00169	-0.00244	0.00635		69.9	0.00266	0.00426	-0.00306	-0.0066	-0.00146	0.0016	-0.00367	-0.01181
70	-0.00154	0.00246	-0.00465	0.000299	0.00213	0.00424	-0.00303	0.0022		70	0.00147	-0.00403	-0.0072	-8.57e-05	0.000913	0.0016	-0.0013	-0.00233
70.1	0.00143	0.00364	0.000679	0.00326	-0.000237	-0.00287	0.00526	0.00576		70.1	-0.0163	-0.00581	0.00642	-0.00482	0.00328	0.00338	-0.000117	-0.00174
70.2	-0.00331	-0.00288	-0.00228	-0.00325	-0.00675	-0.00169	-7.27e-05	0.0022		70.2	-0.0163	-0.00226	0.00761	-0.00897	-0.000272	0.00101	0.00344	-0.00411
70.3	-0.00568	-0.00465	0.00127	0.00445	-0.00261	0.00305	0.00052	0.00102		70.3	-0.00267	0.01078	-0.00246	0.00702	-0.00738	-0.00195	-0.00782	-0.00411
70.4	-0.00391	-0.00465	0.00127	-0.00325	-0.00142	-0.00524	-7.27e-05	0.00339		70.4	-0.00445	-0.00226	-0.00306	-0.00423	0.000913	0.0016	-0.00308	3.53e-05
70.5	-0.00509	-0.00169	0.00186	-0.00207	-0.00379	0.00779	-0.00422	0.00102		70.5	-0.00741	-0.00226	0.000499	0.00406	0.00032	0.0016	-0.00189	-0.0053
70.6	-0.000352	0.00305	-0.0011	-0.00325	-0.00438	-0.00109	-0.00185	-0.00609		70.6	-0.000304	0.00544	-0.00128	-0.00305	0.00684	0.00634	0.01173	0.00418
70.7	-0.00687	-0.00347	-0.00524	0.000299	0.00569	-0.00228	-0.00126	0.00516		70.7	0.00088	0.00189	-0.000686	-0.00719	0.00447	0.00516	0.0064	-0.00826
70.8	-0.00805	-0.00169	-0.0011	-0.00562	-0.0032	-0.00109	-0.00303	0.00694		70.8	-0.00978	-0.00818	0.00879	-0.00127	-0.00501	-0.00136	-0.0096	-0.0047
70.9	-0.00154	-0.00465	0.00364	0.00208	-0.00379	0.00424	-7.27e-05	-0.00076		70.9	-0.00386	-0.00285	0.00583	-0.00305	-0.000272	0.0016	-0.00367	0.01011
71	-0.00509	0.00719	-0.0011	0.000892	-0.00142	9.17e-05	0.00704	0.0022		71	0.01095	0.0013	-0.01076	0.00525	-0.000272	-0.00787	-0.000117	0.00418
71.1	-0.00864	-0.00584	-0.00287	-0.00444	-0.00498	-0.00109	-0.000665	0.00102		71.1	-0.00682	0.00189	0.00465	-0.00482	-0.00264	-0.00136	-0.00189	0.00122
71.2	-0.0045	-0.000506	-0.00228	-0.000293	-0.00735	-0.00287	-0.000665	0.00161		71.2	-0.00623	-0.00522	0.00346	-0.00956	0.00151	0.00397	0.00284	-0.00233
71.3	-0.00983	0.00542	0.00364	-0.00325	-0.0032	0.00128	0.00407	0.00635		71.3	0.00207	-0.00226	0.00168	0.00465	0.00743	-0.00669	-0.00486	-0.00115
71.4	-0.00272	-0.00524	0.00542	0.000299	-0.00142	0.00128	0.00052	0.000425		71.4	-0.00149	0.00604	-0.000686	0.00406	0.00151	0.00575	0.00225	-0.00233
71.5	-0.00509	8.64e-05	-0.00347	-0.00385	-0.00142	-0.00169	-0.00126	0.00161		71.5	-0.00327	0.00248	0.00879	-0.00542	-0.00264	0.0022	0.00344	3.53e-05
71.6	-0.01457	-0.00347	-0.00169	-0.00266	-0.00438	0.00128	-7.27e-05	0.00872		71.6	0.00088	0.000706	-0.000686	-0.00423	0.00328	-0.00136	-0.00426	-0.00233
71.7	-0.00154	-0.00465	0.00305	-0.00148	-0.00379	0.00128	-0.000665	0.00102		71.7	0.0074	0.00426	-0.00306	-0.00779	0.00506	0.00101	-0.00189	-0.000557
71.8	-0.00864	-0.00288	-0.0011	-0.00503	-0.00201	-0.00405	-0.00363	0.00102		71.8	-0.00564	0.0013	0.00465	-0.00542	0.00447	0.00338	-0.00426	0.00655
71.9	-0.00805	-0.00524	-0.00287	-0.00503	0.00391	9.17e-05	-0.00718	-0.00076		71.9	-0.00919	-0.00818	-0.000686	0.00169	-0.00205	-0.00491	0.000475	-0.00233
72	-0.00687	-0.0011	0.000679	-0.00148	-0.00379	0.00128	-0.00185	0.000425		72	-0.00978	0.000113	0.00168	0.0011	-0.00264	0.00397	-0.00308	-0.00233
72.1	-0.01279	-0.000506	-0.00406	-0.000885	-0.00616	9.17e-05	-0.00126	-0.00372		72.1	0.00503	-0.000479	-0.00187	-0.00482	-0.00916	0.00753	0.00818	0.000628
72.2	-0.00746	-0.00761	-0.00228	0.00445	-0.0032	0.00246	0.00052	-0.00254		72.2	-0.0086	-0.00344	-9.35e-05	0.00169	-0.00205	-0.000173	0.00166	3.53e-05
72.3	-0.00983	-0.00702	0.00364	-0.000885	-0.00557	-0.00109	-0.00185	-0.00491		72.3	-0.000304	0.000706	0.00524	0.01176	0.00447	0.00338	-0.0013	0.003
72.4	-0.00509	0.000679	-0.00169	-0.00207	-0.00142	0.00128	0.00407	0.00457		72.4	-0.00682	0.000706	0.00168	-0.01371	-0.00146	0.0016	-0.00604	-0.00352
72.5	-0.000944	-0.00524	8.7e-05	0.00208	-0.00498	0.00128	-0.00185	-0.00313		72.5	0.000288	0.00308	0.00168	-0.00779	-0.000864	-0.000765	-0.00426	-0.00411
72.6	0.000833	-0.00761	-0.0011	-0.00148	0.00332	-0.00346	-0.00422	-0.00431		72.6	-0.00564	-0.00759	0.00287	-0.00364	-0.000864	0.00397	0.00225	0.00477
72.7	-0.00509	-0.00465	8.7e-05	-0.00385	-0.00557	-0.00109	-7.27e-05	-0.00609		72.7	-0.00445	-0.0064	-0.00424	0.00525	0.00624	0.00279	0.01114	0.0107
72.8	-0.00509	-0.00584	0.000679	-0.00385	-0.0032	0.00246	-0.000665	0.00161		72.8	-0.00445	-0.00403	0.000499	-0.00542	-0.00205	0.0022	-0.00723	-0.00115
72.9	-0.00864	-0.00169	-0.00584	0.00326	-0.00675	0.00246	0.00289	0.00398		72.9	-0.00267	-0.00581	0.00405	-0.00246	-0.0062	-0.000765	-0.01611	-0.01181
73	-0.0045	-0.00288	-0.000505	0.00208	-0.00379	0.00661	-0.00303	-0.00372		73	-0.00386	0.00604	0.00583	-0.000678	-0.000864	0.0022	-0.00249	-0.000557
73.1	-0.00805	-0.00702	-0.00169	-0.01036	-0.00616	0.00424	-0.00896	-0.00491		73.1	0.00207	-0.00166	0.00168	0.00228	-0.000864	0.00457	-0.000117	0.0024
73.2	0.00261	-0.00347	-0.00287	-0.00148	-0.0032	-0.00287	-0.00244	0.00161		73.2	-0.00741	-0.00226	0.00346	0.0011	0.00565	-0.000765	0.00936	0.0024
73.3	-0.00687	-0.00465	-0.00347	0.00563	-0.0032	0.00602	0.00348	0.0022		73.3	-0.00327	-0.00403	-0.00128	-0.000678	0.00151	-0.000765	0.00344	0.00181
73.4	-0.00924	-0.00761	0.00127	-0.00207	-0.00675	0.00602	-0.00422	0.00279		73.4	0.01154	0.0013	-0.00483	0.00939	-0.00679	0.00457	-0.00367	-0.00115
73.5	-0.00628	-0.00406	0.00186	-0.00325	-0.00201	9.17e-05	0.00111	0.000425		73.5	-0.00327	-0.00285	0.00287	-0.00364	-0.0062	0.0099	-0.00604	-0.00826
73.6	-0.00331	-0.00643	-0.0011	-0.000293	-0.00201	-0.00583	-0.01014	0.00635		73.6	-0.01215	0.00189	-0.00187	-0.00127	0.00802	-0.00136	0.00166	-0.00826
73.7	-0.00272	-0.00288	-0.00465	0.000299	-0.00498	9.17e-05	-7.27e-05	-0.00254		73.7	0.0068	-0.00403	0.00346	0.00288	-0.000272	0.00397	-0.00545	-0.00352
73.8	-0.00628	-0.00288	-0.0011	-0.00207	0.00391	0.0072	-0.00126	0.00161		73.8	-0.00504	-0.00226	0.00642	0.00465	0.0021	0.00397	-0.00249	0.00359
73.9	-0.00568	-0.00761	0.00838	-0.00859	-0.00498	-0.00228	-0.00777	0.00457		73.9	-0.01097	0.00367	-9.35e-05	0.00288	-0.000272	-0.00136	0.000475	0.000628
74	-0.01753	8.64e-05	-0.00169	-0.00385	-0.000237	0.00128	-0.00126	-0.00609		74	-0.00504	0.000706	-0.00483	-0.00364	-0.00146	-0.00195	-0.00663	-0.0047
74.1	-0.00628	-0.00584	-0.00228	0.00267	-0.00261	0.00246	0.00052	-0.0055		74.1	0.00384	-0.00285	-0.00246	-0.00305	-0.00264	0.00634	0.00462	3.53e-05
74.2	-0.00154	-0.00465	0.00186	0.00326	-0.00498	-0.000501	0.00052	-0.00254		74.2	-0.00267	0.000706	-0.00306	-8.57e-05	0.00269	0.00694	0.000475	-0.00174
74.3	-0.000944	0.00246	8.7e-05	-0.00207	-0.00201	-0.000501	-7.27e-05	-0.00431		74.3	0.00503	-0.007	0.00405	0.00288	0.00447	-0.00254	-0.00723	-0.01181
74.4	-0.00331	-0.0011	-0.00347	0.000892	0.000355	0.00424	0.00111	-0.00076		74.4	-0.00919	0.00604	0.00109	0.00169	0.00624	0.00575	0.00403	-0.00589
74.5	0.00143	-0.00524	0.000679	-0.00207	-0.00794	0.00305	0.0017	0.00339		74.5	-0.01156	-0.000479	0.00287	-0.00601	0.000913	-0.00728	0.000475	-0.00174
74.6	-0.00509	-0.0088	8.7e-05	-0.000293	-0.00735	-0.00287	-0.00303	-0.000168		74.6	0.00384	-0.00877	0.00346	0.00169	0.00328	0.0016	-0.00426	0.00359
74.7	-0.00805	-0.0088	-0.00169	-0.00444	0.000948	0.00128	-0.00718	-0.00609		74.7	-0.00149	-0.00877	-0.00128	0.00584	0.000913	0.00338	0.0064	0.0024
74.8	0.00143	-0.00288	0.00305	-0.00385	-0.00794	0.00365	-0.000665	-0.00787		74.8	-0.01689	0.00189	-0.000686	-0.00305	-0.00442	0.00042	0.00166	-0.00174
74.9	-0.00509	-0.00702	0.000679	-0.00385	-0.00912	0.00246	-0.00126	-0.00135		74.9	0.00266	-0.00285	-0.00839	-8.57e-05	0.0021	0.0022	-0.0013	-0.00115
75	0.000241	-0.00702	-0.00702	0.000892	-0.00379	0.00602	-0.00126	0.0022		75	0.00384	-0.00107	0.00405	0.00347	0.00447	-0.00254	0.00166	0.003
75.1	0.00261	-0.00228	-0.00228	-0.00148	-0.00675	0.00542	0.00111	0.00161		75.1	-0.01215	0.00248	0.00168	-0.00719	0.000913	-0.00491	0.00225	0.0024
75.2	0.00439	-0.00643	0.000679	0.000892	-0.00675	0.00128	-0.006	-0.00372		75.2	-0.000897	-0.00581	-0.00246	0.00762	0.00387	0.00338	-0.00249	-0.000557
75.3	-0.000352	-0.00524	8.7e-05	0.00208	-0.00557	-0.00405	-7.27e-05	-0.01142		75.3	-0.00327	-0.00344	-0.000686	-0.00246	-0.00383	0.01286	0.00877	-0.00589
75.4	0.00498	-0.0088	-0.0011	-0.000885	-0.00379	9.17e-05	-0.00185	-0.00728		75.4	-0.00741	0.00781	-0.00365	-0.000678	0.00151	0.00812	0.000475	-0.00174
75.5	0.00498	-0.00524	-0.00524	-0.00207	0.00391	-0.00169	-0.00303	0.00161		75.5	0.00443	-0.00226	0.00109	-0.00127	-0.000272	-0.00432	0.00166	-0.000557
75.6	0.00202	-0.01117	0.00483	0.00267	-0.00557	0.00779	0.00052	-0.00431		75.6	-0.00445	-0.01529	-0.000686	0.00169	0.000913	0.0022	0.00166	0.00359
75.7	-0.00805	-0.01532	0.00127	0.00385	-0.00675	0.000684	0.00289	-0.00313		75.7	-0.000304	-0.0064	-0.00306	-8.57e-05	0.000913	0.00279	-0.00249	-0.00648
75.8	-0.00924	-0.00939	-0.00524	0.00267	-0.000237	0.00424	0.00467	-0.00491		75.8	-0.00741	0.00722	-0.000686	0.00169	0.00269	-0.00254	-0.00308	-0.0053
75.9	-0.00746	-0.01176	-0.00169	-0.00681	-0.00794	-0.00169	-0.00244	-0.000168		75.9	-0.00978	-0.00996	0.00109	-0.00246	0.00269	0.00812	-0.00189	0.0024
76	-0.000352	-0.00643	0.00305	0.000299	-0.00557	-0.00287	-0.00185	-0.00313		76	-0.000304	0.00308	0.000499	0.00643	0.00447	-0.000173	-0.00071	-0.00589
76.1	-0.00509	-0.00761	0.00483	-0.000885	-0.00498	0.00305	0.00644	0.00102		76.1	-0.00445	-0.00463	0.00583	0.000507	-0.00679	0.00575	0.00462	0.00537
76.2	0.000833	-0.00761	8.7e-05	0.00445	-0.00142	0.00483	-7.27e-05	-0.00254		76.2	-0.000304	-0.00226	-0.00898	-0.00423	0.00269	0.00931	0.00225	0.00833
76.3	-0.00509	-0.00406	-0.000505	-0.00148	-0.00912	-0.00169	0.00822	-0.00135		76.3	-0.00327	-0.00463	0.00346	0.00525	0.0021	-0.00432	0.0064	0.0024
76.4	-0.0045	-0.00998	-0.00465	-0.00148	-0.00201	0.00246	-0.000665	-0.00076		76.4	-0.00801	-0.00996	0.00642	0.0011	-0.000864	-0.000173	0.00344	-0.00115
76.5	-0.00924	-0.00998	0.00246	0.00148	0.00154	0.00128	-0.00185	-0.00431		76.5	-0.0086	-0.00285	-0.00128	-0.0066	0.01098	-0.00195	-0.00308	0.00774
76.6	-0.00272	-0.0088	0.00305	0.00563	-0.00853	0.00483	0.00585	-0.00372		76.6	0.00384	0.000113	0.00228	-8.57e-05	-0.00383	-0.000765	-0.0013	0.00537
76.7	-0.000944	-0.00288	-0.00228	-0.000293	-0.00794	0.00838	-0.000665	-0.00431		76.7	-0.000304	0.0013	-0.01016	0.00465	-0.000864	0.00101	-0.00308	0.003
76.8	-0.00746	-0.00584	0.00186	0.000892	-0.00498	0.00246	0.00111	-0.00609		76.8	-0.00504	-0.00285	0.00168	0.00584	0.0021	0.00812	0.00581	-0.00707
76.9	0.000241	-0.00702	-0.00169	0.000299	-0.000237	-0.00287	-0.000665	0.0022		76.9	0.00443	0.00189	0.00109	-0.00186	0.00624	-0.00136	0.00699	0.00596
77	-0.00746	-0.00939	-0.00406	-0.0074	-0.00557	0.000684	-0.00244	0.0022		77	0.000288	-0.00226	0.00168	-8.57e-05	0.00032	-0.00728	-0.00426	0.0024
77.1	-0.000944	-0.00643	0.00246	-0.000293	-0.00853	0.00542	0.00526	-0.00254		77.1	-0.00445	0.00367	0.00346	0.0088	0.000913	0.00101	-0.00249	-0.00826
77.2	-0.000352	-0.00406	-0.000505	0.00445	-0.00557	0.000684	0.00289	-0.00135		77.2	-0.0086	0.00544	0.00346	0.00347	-0.00146	0.00634	-0.00249	-0.00233
77.3	-0.00272	-0.00761	-0.000505	0.00148	-0.00083	-0.00109	0.00407	0.00161		77.3	-0.00208	-0.00996	-0.00128	-0.00186	0.00624	0.00516	-0.00189	0.00951
77.4	-0.00628	-0.00406	0.000679	-0.000293	-0.01031	-0.00642	-0.000665	0.00694		77.4	-0.00327	-0.00581	-0.00128	0.00228	0.0021	0.00279	-0.000117	-0.000557
77.5	-0.00924	-0.00406	0.00127	0.000892	-0.00261	0.00365	-0.00185	0.00339		77.5	-0.00919	0.000113	-0.00128	-0.00186	0.00151	0.00338	0.00462	0.003
77.6	-0.00568	-0.00347	-0.00287	-0.00207	-0.00557	9.17e-05	-0.000665	-0.00787		77.6	-0.00564	-0.00166	-9.35e-05	-0.000678	0.00861	0.00042	0.00521	-0.0047
77.7	-0.000352	-0.00347	0.00186	0.000299	-0.00498	0.00246	0.00644	0.00161		77.7	0.00207	-0.007	-0.00483	0.00228	0.000913	0.0016	0.00107	-0.00411
77.8	-0.00391	-0.00524	0.000679	0.00267	-0.0032	0.00602	0.0023	0.00161		77.8	-0.000304	-0.00107	-0.00306	0.00702	0.00032	-0.00136	-0.00841	-0.00293
77.9	-0.00805	-0.01117	-0.0011	-0.000293	-0.00735	-0.00169	0.00052	-0.00431		77.9	0.00147	-0.00107	-9.35e-05	0.00702	0.000913	0.00338	-0.01137	0.01129
78	-0.00687	-0.00939	8.7e-05	-0.00148	-0.0032	-0.00287	-0.00126	-0.0055		78	-0.00682	-0.00107	-0.00365	-8.57e-05	0.00506	0.00575	0.00818	-0.000557
78.1	-0.00628	-0.00465	-0.00584	0.000299	-0.00379	0.00305	0.00467	-0.00372		78.1	-0.00978	0.00189	0.000499	-0.00364	-0.000272	-0.00136	0.00818	0.00596
78.2	-0.00568	-0.00702	-0.0011	0.00385	-0.000237	0.00661	-7.27e-05	-0.00076		78.2	-0.00208	0.000113	0.00405	0.00228	0.0021	0.00338	-0.00545	0.00122
78.3	-0.00687	-0.01117	0.00246	0.000299	-0.00261	0.00128	-7.27e-05	-0.00076		78.3	0.00147	0.00544	0.00287	0.0011	0.00269	0.01227	-0.00367	3.53e-05
78.4	-0.01042	-0.01058	0.00483	-0.000293	-0.00379	-0.000501	0.00111	-0.00313		78.4	-0.000304	-0.00285	0.00228	-8.57e-05	0.00565	-0.00787	0.00284	-0.00885
78.5	-0.00687	-0.00169	-0.00406	-0.00207	-0.00379	-0.00109	0.00407	-0.00135		78.5	-0.01037	-0.00226	-0.00246	0.00525	-0.000272	-0.00254	-0.00308	-0.00233
78.6	-0.00924	-0.00761	-0.00228	-0.000293	-0.00557	-0.00287	-0.000665	-0.00431		78.6	-0.00208	-0.00285	-0.00424	0.00939	-0.00323	0.00101	-0.00071	0.00122
78.7	-0.01101	-0.00761	8.7e-05	-0.00325	-0.00379	-0.00228	0.00526	0.0022		78.7	-0.00327	0.00367	-0.00661	-0.00719	0.0098	0.00338	-0.00308	-0.000557
78.8	-0.00924	-0.01413	0.00423	0.000892	-0.00201	0.000684	-0.00303	-0.0055		78.8	-0.00445	-0.00166	-0.00306	0.00288	-0.00679	-0.00195	-0.00426	-0.00293
78.9	-0.00864	8.64e-05	8.7e-05	0.000892	-0.00379	0.00602	0.00348	0.00102		78.9	0.00088	-0.000479	-0.00542	0.00347	0.00447	0.00042	-0.0013	-0.00767
79	-0.00746	-0.00347	0.0066	0.00267	-0.00912	-0.00346	0.00348	-0.00076		79	0.00088	-0.007	0.00524	0.00228	-0.00205	0.00753	-0.00367	0.00714
79.1	-0.01161	-0.00169	-0.00465	0.000892	0.00154	0.00305	-0.000665	0.00102		79.1	-0.00208	0.00544	0.000499	-0.000678	0.00447	-0.00136	0.00107	0.00714
79.2	-0.01042	-0.00702	-0.00643	0.00267	-0.00675	-0.00405	0.00407	-0.0055		79.2	-0.00623	-0.00226	0.00109	-0.00127	-0.00264	0.00338	-0.000117	0.00418
79.3	-0.00331	-0.00702	0.00364	0.00682	-0.00912	9.17e-05	-7.27e-05	-0.00728		79.3	-0.000897	-0.000479	-0.00424	-0.00305	0.01098	-0.00254	-0.009	0.00596
79.4	-0.000352	-0.01058	-0.00169	-0.000293	-0.00616	0.00424	-0.00185	0.000425		79.4	-0.000304	0.000706	0.00405	0.00347	0.00624	-0.000765	-0.00249	-0.00293
79.5	0.000241	8.64e-05	0.00483	0.00859	-0.00142	0.00128	0.0023	0.00813		79.5	-0.00267	-0.000479	0.00168	0.00762	-0.00323	-0.00136	-0.00308	0.000628
79.6	-0.0122	0.00127	0.0066	0.00208	-0.00142	-0.00109	0.00763	-0.00431		79.6	-0.00445	-0.00877	-0.00779	0.0011	0.00624	0.0022	0.00166	-0.00944
79.7	-0.00509	-0.00406	0.0066	0.00445	-0.00142	-0.00524	0.0017	-0.00491		79.7	-0.00149	-0.00285	0.00287	0.00288	0.00447	0.00042	-0.00071	0.00951
79.8	-0.0045	-0.00347	8.7e-05	-0.00325	-0.00142	-0.00109	0.00348	0.00279		79.8	-0.0086	0.00189	0.00405	0.00288	0.00387	0.00101	-0.00604	0.00833
79.9	-0.000944	-0.0088	0.00305	0.00148	-0.00675	-0.00287	0.0023	0.00279		79.9	-0.000304	-0.00166	0.00465	0.00228	0.00328	-0.00136	-0.00723	-0.00707
80	0.0032	-0.00524	0.00186	-0.00207	-0.00379	0.00365	0.00467	-0.00372		80	-0.00149	-0.00344	-0.00306	-0.00305	0.00151	-0.00373	-0.009	-0.00293
80.1	-0.00331	-0.00821	-0.00228	0.00267	-0.00853	0.00542	0.00111	-0.000168		80.1	0.00147	0.00308	-0.000686	0.00347	0.00506	-0.00136	0.00344	0.00537
80.2	-0.00805	0.000679	0.00186	0.000299	0.00213	0.00365	0.00585	0.000425		80.2	-0.00919	-0.00226	-0.00306	0.01117	0.00802	0.01345	0.00403	0.00596
80.3	-0.000944	-0.00821	-0.0011	0.00622	-0.00083	9.17e-05	-0.00126	0.00161		80.3	-0.01037	0.00426	-0.00365	-8.57e-05	0.00269	0.0022	0.00581	-0.00233
80.4	0.00261	0.00127	0.0066	0.01096	0.00391	-0.00228	0.00644	-0.00431		80.4	-0.000304	0.000706	-9.35e-05	-0.00423	-0.00146	0.00042	-0.00308	0.00418
80.5	0.000241	-0.0011	0.00364	0.00622	-0.00201	-0.00109	0.0017	-0.00076		80.5	-0.000304	0.000706	0.00109	-0.00186	0.00624	0.00694	-0.01374	0.00596
80.6	-0.0045	-0.00643	8.7e-05	-0.00148	0.00213	-0.00346	0.00111	-0.00431		80.6	-0.00445	-0.00107	0.00346	0.00169	-0.00264	-0.0055	0.000475	-0.00174
80.7	-0.00391	-0.0011	0.00127	-0.00325	0.000355	0.00365	0.01177	0.00398		80.7	-0.00919	0.00426	-0.00306	0.00406	-0.000864	0.00397	0.00166	-0.000557
80.8	-0.00687	0.000679	0.00542	0.00208	-0.00557	0.00246	0.0017	-0.00254		80.8	-0.01334	0.00426	-0.00306	0.00584	0.00447	0.00397	-0.00841	-0.00233
80.9	-0.00568	-0.00288	-0.0011	0.00622	-0.00379	0.00128	-0.000665	-0.00254		80.9	0.00325	0.00367	-0.00246	0.000507	0.00743	-0.000765	-0.00249	0.0024
81	-0.00687	-0.00939	0.00423	-0.000293	-0.00201	-0.00465	-0.0054	-0.00313		81	-0.00149	0.0013	0.00109	-0.00186	0.00861	0.00338	-0.000117	0.00477
81.1	-0.01398	-0.00584	0.0066	0.000892	-0.00735	-0.000501	-7.27e-05	-0.00135		81.1	0.000288	-0.00107	0.00287	0.00465	0.00151	-0.00313	0.00403	-0.0053
81.2	-0.00805	-0.00702	0.000679	-0.00266	0.000948	-0.00405	0.00881	0.00576		81.2	-0.00208	0.000113	0.000499	-0.00423	-0.00501	0.00101	-0.00367	-0.0047
81.3	-0.00687	-0.00228	-0.00169	0.00563	-0.00379	-0.000501	-0.00481	-0.00372		81.3	0.00443	0.00485	-0.00957	-0.0066	-0.00264	-0.00195	-0.01315	0.00418
81.4	-0.00331	-0.00228	-0.0011	0.00504	-0.00616	-0.0082	0.00467	-0.00135		81.4	-0.00149	0.00544	0.00524	0.01117	0.00151	-0.00195	0.000475	0.00655
81.5	-0.00568	0.00127	0.00779	0.00267	-0.0032	0.00128	0.00467	-0.00135		81.5	-0.00623	-0.00166	0.00168	0.00525	0.00447	0.00516	0.00403	-0.00115
81.6	-0.00331	0.000679	-0.00169	-0.00266	-0.00498	-0.00346	-0.00244	-0.00135		81.6	-0.000897	-0.000479	0.00168	-0.00305	0.000913	-0.00136	-0.00426	-0.0047
81.7	0.000241	-0.00702	8.7e-05	0.00385	0.00213	0.00246	0.00644	-0.00491		81.7	0.00266	-0.007	-0.00898	0.00169	0.00387	0.00042	-0.00545	0.00477
81.8	-0.00568	-0.000506	-0.00169	0.00385	-0.00083	-0.00228	-0.000665	0.00339		81.8	-0.00149	0.00189	-0.00246	0.00347	0.01335	-0.0061	-0.00486	0.00122
81.9	-0.00805	-0.00169	0.00364	-0.00266	0.00272	-0.000501	-0.00422	0.00161		81.9	-0.00445	-0.000479	-0.00128	0.000507	0.00151	-0.00373	0.00166	0.000628
82	-0.0045	-0.00288	0.00246	0.00148	-0.00616	-0.00287	0.0023	-0.00135		82	0.00088	-0.00877	-9.35e-05	-0.00186	-0.00205	-0.00195	-0.00545	-0.00293
82.1	-0.0045	-0.00584	-0.00228	0.00622	-0.00261	0.000684	0.00111	-0.00254		82.1	0.00503	-0.00403	0.000499	0.00169	0.00624	0.00397	-0.01315	0.00418
82.2	0.00143	-0.00347	0.00897	-0.00148	-0.0032	0.00246	-0.000665	0.000425		82.2	-0.00327	0.01255	-0.00128	0.00169	0.0021	0.00575	-0.00071	0.00833
82.3	-0.00864	-0.00406	-0.000505	0.00563	0.00569	-0.000501	0.00822	0.00398		82.3	-0.00978	0.00189	-0.00128	0.00169	-0.00323	-0.00195	-0.0096	-0.00885
82.4	-0.00805	-0.00465	-0.00169	0.00622	-0.00083	-0.00524	0.0023	-0.000168		82.4	-0.00267	0.00248	-0.00602	-0.00186	0.00506	0.0016	-0.00426	-0.00352
82.5	-0.00568	-0.00288	0.00246	-0.00148	-0.00557	-0.00169	0.00052	-0.000168		82.5	-0.00327	-0.00463	-0.00128	0.01354	0.00151	-0.00136	-0.000117	0.000628
82.6	-0.000944	0.000679	0.00246	-0.0074	-0.00379	-0.00109	0.00348	-0.00313		82.6	-0.00208	0.00248	-9.35e-05	-8.57e-05	0.00684	0.00042	-0.00486	3.53e-05
82.7	-0.00509	-0.00702	0.00305	0.00978	0.000355	-0.00169	0.00348	-0.00194		82.7	0.000288	0.000113	-0.00424	-0.0066	0.00032	-0.00432	-0.00604	-0.00767
82.8	-0.00864	-0.00524	0.000679	0.00208	0.000355	9.17e-05	-0.00363	-0.00313		82.8	0.00562	0.000706	0.00168	0.00288	0.00151	0.00101	-0.00071	0.00833
82.9	-0.000944	-0.00702	-0.00347	-0.00562	-0.00438	-0.00405	0.0023	0.000425		82.9	0.00562	0.00248	0.00465	0.00228	0.00269	-0.00195	-0.000117	0.000628
83	-0.00154	-0.0011	0.00127	0.00563	-0.00142	-0.00465	0.00348	-0.00076		83	-0.01037	0.00367	0.00346	-0.00542	-0.00146	-0.00491	0.00936	-0.0047
83.1	-0.00391	-0.000506	0.00364	-0.000885	-0.000237	-0.00583	-0.00126	-0.00135		83.1	-0.00564	-0.000479	0.00168	-0.000678	0.00861	0.00457	0.000475	0.00122
83.2	-0.00272	0.00305	0.00483	-0.000293	0.00391	0.00365	-0.00363	0.00339		83.2	-0.00504	0.00485	-0.00187	0.00702	-0.00264	-0.00491	-0.009	3.53e-05
83.3	-0.00154	-0.0011	0.000679	-0.00207	-0.00498	-0.00702	-0.00126	0.000425		83.3	-0.00564	0.01255	-0.000686	0.00406	0.0021	0.00338	-0.00249	-0.00174
83.4	-0.0045	-0.00347	-0.000505	0.00445	-0.00142	9.17e-05	0.00348	0.00516		83.4	0.00147	-0.00285	0.00879	-0.00246	0.00684	0.00457	-0.00545	-0.00115
83.5	0.00143	0.000679	0.00186	0.00148	-0.000237	9.17e-05	0.00348	-0.00194		83.5	0.00384	-0.00107	-0.00128	-0.00779	-0.0056	-0.00136	-0.00426	-0.00174
83.6	-0.00154	0.00423	0.00601	0.00622	0.000948	9.17e-05	0.00526	0.00457		83.6	-0.00208	0.00722	0.00465	0.00347	0.00565	0.0022	-0.00426	-0.00115
83.7	-0.00746	-0.00524	0.000679	-0.000293	0.00213	-0.00524	-7.27e-05	-0.00313		83.7	-0.00386	0.00663	-0.00306	0.00406	-0.00264	-0.00313	-0.00249	-0.00352
83.8	-0.00568	-0.000506	0.00246	-0.00148	-0.0032	-0.00405	0.0023	0.00102		83.8	-0.00741	-0.01055	-0.00246	0.00643	-0.00442	0.00338	0.00225	0.01366
83.9	-0.0045	0.00305	0.00127	0.00504	-0.00379	-0.00465	0.00289	-0.00135		83.9	-0.00267	-0.00581	0.00109	-0.00364	0.0021	-0.00313	-0.00189	-0.00944
84	-0.000352	-0.00228	-0.00643	-0.00266	0.00154	-0.00583	-7.27e-05	-0.00194		84	-0.00801	0.000706	0.000499	-0.00423	0.00861	-0.00195	-0.00071	-0.01063
84.1	0.0032	-0.00702	0.00364	0.000299	-0.00201	9.17e-05	0.00585	0.000425		84.1	-0.000304	0.00841	-0.000686	0.00939	-0.00146	0.00812	-0.00604	0.0024
84.2	-0.00213	-0.00228	0.00897	-0.000293	0.000948	-0.000501	0.0017	0.00339		84.2	-0.00386	0.01078	-0.00483	-0.000678	0.00032	0.00575	-0.0013	-0.00293
84.3	-0.00509	0.00246	0.00364	0.00326	0.000355	-0.000501	0.00407	-0.00135		84.3	-0.00504	-0.00285	-0.00187	-8.57e-05	0.00387	-0.00432	0.00225	0.00418
84.4	-0.0045	0.00779	-0.0011	0.00267	-0.00142	-0.00405	0.00111	-0.00194		84.4	-0.01097	0.00722	0.00168	-0.00423	-0.00738	-0.00254	0.00284	0.00655
84.5	0.00143	8.64e-05	0.00305	0.000299	-0.00142	-0.00346	0.0023	0.00279		84.5	-0.00445	0.00367	-0.00128	-8.57e-05	-0.00146	-0.00373	-0.00663	-0.00707
84.6	-0.00391	0.00186	0.00186	-0.00207	-0.00261	-0.000501	0.00526	-0.00076		84.6	-0.00149	0.000706	0.00405	-0.00246	0.00624	-0.000765	-0.01196	-0.00233
84.7	0.000241	0.00186	-0.00228	0.000892	0.000355	0.000684	-0.000665	0.00339		84.7	-0.00149	0.00308	-0.00187	0.0011	0.00387	0.00753	0.00581	0.0024
84.8	0.00261	-0.00347	0.00601	-0.00385	0.0045	-0.000501	0.00467	0.000425		84.8	-0.00445	0.0013	0.000499	-0.00364	-0.00323	-0.000173	-0.00308	-0.0047
84.9	0.00439	-0.00584	-0.000505	0.00326	0.000948	9.17e-05	0.00644	0.0022		84.9	-0.00564	-0.00463	0.00287	-0.000678	-0.00146	-0.0061	-0.0013	0.00418
85	0.00143	-0.0011	0.0072	0.00918	0.0045	-0.00702	0.00407	0.0022		85	0.00088	0.00485	0.00701	-0.00423	0.00151	0.00575	-0.00545	0.00477
85.1	-0.00272	0.00305	0.00305	0.00148	0.00332	-0.00524	0.00407	-0.00076		85.1	0.00207	0.00189	-0.00306	-0.00542	0.00624	-0.00254	0.00699	-0.0047
85.2	0.00676	-0.00169	-0.00169	0.000892	0.0045	-0.00287	0.0017	0.00102		85.2	-0.00919	0.00367	0.00465	0.00525	-0.00383	-0.0055	-0.00071	-0.00707
85.3	-0.000352	-0.0011	-0.000505	0.000892	0.00272	-0.00583	0.0017	0.00457		85.3	-0.01274	0.00367	0.00346	0.00347	0.00328	-0.00373	-0.00782	0.000628
85.4	0.00261	-0.00169	0.00423	-0.00207	0.00509	-0.000501	0.00348	0.00102		85.4	-0.00445	0.00367	-0.00483	0.00406	-0.00205	0.00279	-0.01493	0.00774
85.5	-0.00213	0.00305	0.00127	-0.00385	-0.000237	-0.00287	-0.00422	0.00161		85.5	0.000288	0.00426	0.00642	-0.00779	0.00861	0.0022	-0.00782	-0.00233
85.6	0.0038	0.000679	0.00186	0.00267	-0.0032	-0.00346	-0.00303	-0.00254		85.6	0.000288	-0.00344	0.00465	0.00584	0.00624	-0.00432	-0.01019	-0.00174
85.7	-0.00509	0.00364	0.00364	0.00385	0.000948	-0.00465	0.00289	-0.00076		85.7	0.00562	-0.00107	-0.00957	0.00465	-0.000272	-0.00195	0.00166	-0.00944
85.8	-0.00331	0.00305	-0.00169	-0.00148	-0.00735	0.00305	-0.00244	0.00694		85.8	0.00384	-0.00877	0.01057	-8.57e-05	-0.000272	-0.00136	-0.0013	-0.00174
85.9	-0.00509	8.64e-05	-0.00347	-0.000293	0.00806	-0.00169	-0.00481	0.000425		85.9	0.00207	0.00663	0.00524	-8.57e-05	0.00684	-0.00254	-0.00486	0.00359
86	0.000833	0.00305	-0.00287	-0.00266	0.00569	-0.00879	0.00407	-0.00076		86	-0.01393	0.00663	-9.35e-05	-8.57e-05	0.0021	-0.0055	0.00107	0.0024
86.1	-0.00628	-0.00169	0.00305	0.00741	0.00154	-0.00109	0.00289	-0.00194		86.1	-0.00682	-0.00463	-0.00246	-0.00542	-0.00323	0.00457	-0.00189	-0.000557
86.2	-0.00154	-0.00228	0.00127	0.000299	-0.00735	0.00246	0.0023	0.00339		86.2	-0.01215	0.00189	0.00346	0.01058	-0.00205	0.0022	-0.00426	0.00537
86.3	-0.00272	0.00186	0.0066	-0.00266	0.00509	-0.00346	0.00407	-0.000168		86.3	0.000288	0.00189	0.00109	-0.00542	0.00328	-0.00669	-0.00486	-0.01122
86.4	-0.00331	0.00186	0.00186	-0.00207	-0.00261	-0.00524	-0.00185	0.00398		86.4	0.00503	0.00308	-9.35e-05	-0.00956	0.00269	-0.00432	-0.000117	0.00477
86.5	0.00261	-0.00584	-0.00228	0.00267	-0.0032	-0.00524	0.00644	0.0099		86.5	-0.00208	0.00781	0.00346	0.0011	-0.0056	0.00516	0.00344	-0.00411
86.6	0.0032	0.00246	0.00186	0.00208	-0.00438	0.00128	0.00111	0.00457		86.6	-0.00445	0.0013	0.000499	0.0088	-0.000272	-0.00669	0.00166	-0.00707
86.7	-0.00391	-0.00288	8.7e-05	-0.00325	-0.00379	-0.000501	0.00111	0.00398		86.7	0.00088	-0.00107	-0.000686	-0.00542	0.00387	-0.000765	-0.00426	-0.00115
86.8	-0.00509	0.00127	0.00483	0.000299	-0.000237	-0.00524	-0.000665	-0.00076		86.8	-0.00445	-0.00107	0.00879	-8.57e-05	0.0021	0.0016	-0.0096	0.0024
86.9	-0.000352	0.00246	-0.00643	0.000299	0.00154	-0.00346	-0.000665	-0.00787		86.9	-0.000897	0.00248	0.00405	0.00465	-0.000864	0.00042	-0.00545	0.0024
87	-0.00331	0.00364	8.7e-05	-0.00325	-0.00261	-0.00228	0.00526	0.00161		87	-0.00445	0.01078	-0.00128	0.00702	0.00387	-0.00787	-0.00782	-0.00115
87.1	-0.00805	0.00542	-0.000505	0.000892	0.000355	-0.00109	0.0023	0.00102		87.1	0.000288	0.00367	0.00642	0.0011	-0.00264	0.00279	0.00344	-0.00707
87.2	-0.00154	-0.00169	0.00423	-0.00562	-0.00142	-0.00169	-0.00244	0.00161		87.2	-0.00386	0.00544	-9.35e-05	-0.01134	-0.000272	-0.00254	0.000475	-0.00293
87.3	-0.00272	-0.0011	0.00483	0.00148	-0.00261	-0.00465	-0.00185	0.00161		87.3	0.000288	0.00248	-0.00365	-0.000678	0.00506	-0.00254	-0.00723	0.00359
87.4	0.00202	-0.000506	8.7e-05	0.000892	0.000355	-0.00465	0.00467	0.000425		87.4	-0.00386	0.00722	0.00524	0.00762	0.0021	-0.000765	-0.0013	-0.00293
87.5	-0.00272	0.00601	-0.000505	0.000299	-0.00142	0.000684	0.00348	0.00516		87.5	0.000288	-0.00996	0.00346	0.00762	-0.00146	0.00397	-0.00071	-0.00233
87.6	-0.00213	-0.0011	0.00186	-0.00148	0.00509	0.00128	0.00052	0.00279		87.6	0.00147	0.00544	0.00346	0.00169	0.00269	0.0022	-0.00071	-0.0047
87.7	0.000241	0.000679	8.7e-05	0.00563	0.00628	-0.00346	-7.27e-05	-0.00728		87.7	-0.00682	0.00485	-0.00246	-0.00423	-0.00323	0.0016	-0.000117	-0.01004
87.8	-0.00213	-0.00465	0.00127	0.00267	-0.00498	-0.00405	-0.00126	-0.00194		87.8	0.00858	-0.00403	0.00465	-8.57e-05	-0.000272	-0.00254	-0.00426	3.53e-05
87.9	-0.00331	-0.0011	0.00186	-0.00977	0.00154	-0.00346	0.00052	0.0022		87.9	-0.00623	0.00248	-0.00187	-0.00364	-0.0056	-0.0061	-0.000117	0.00122
88	-0.00272	0.00364	-0.00169	-0.00385	-0.000237	-0.00228	0.00704	0.00279		88	-0.00386	-0.00877	0.00228	-0.00364	0.0021	-0.00491	0.00225	-0.00411
88.1	-0.000944	0.00186	-0.000505	0.00385	0.000948	0.00365	0.00052	0.00398		88.1	0.00147	0.00604	0.00524	-0.00364	0.00565	0.0016	-0.00071	-0.00589
88.2	-0.00687	8.64e-05	0.00246	0.00148	-0.00201	-0.00228	0.0023	0.00457		88.2	-0.00741	0.01552	0.00583	0.00169	0.00151	0.00042	-0.00604	0.00477
88.3	-0.000944	-0.000506	-0.00228	-0.00681	-0.00379	-0.000501	0.0023	0.00516		88.3	-0.000304	-0.00107	-0.00542	0.00702	0.0021	0.00397	0.00403	0.00418
88.4	0.00735	0.00305	-0.000505	-0.00325	-0.0032	0.000684	-0.00244	0.000425		88.4	-0.00327	-0.0064	-0.00187	-8.57e-05	-0.00738	0.00397	-0.00071	-0.00826
88.5	-0.000944	0.00127	0.00364	0.00208	-0.00083	9.17e-05	0.0017	0.00339		88.5	-0.01037	-0.00522	0.00346	-0.01075	-0.00501	0.00279	0.00166	0.0024
88.6	-0.00628	0.00423	-0.00228	0.00385	-0.00379	-0.000501	0.00111	-0.00194		88.6	-0.000304	-0.00107	0.00287	0.00347	0.000913	0.00457	-0.00426	3.53e-05
88.7	0.0032	0.00186	-0.00761	0.000892	0.000355	0.00128	0.0017	0.00102		88.7	-0.00208	-0.000479	-0.00187	0.00169	-0.00146	-0.00847	-0.00782	-0.00293
88.8	0.000241	-0.00702	-0.000505	0.000892	0.00569	9.17e-05	0.00052	-0.000168		88.8	-0.01511	0.000706	-0.00128	-0.00601	0.00624	-0.00254	-0.00308	-0.01063
88.9	0.000833	-0.00406	0.00127	-0.00148	0.000948	9.17e-05	-0.00303	0.00635		88.9	-0.00682	-0.00403	0.00405	0.00465	0.00743	-0.00254	0.00462	0.00774
89	0.00143	0.00305	0.000679	-0.00207	0.000355	9.17e-05	-0.00185	0.00279		89	-0.00386	0.0013	0.000499	0.00169	-0.00442	0.00516	-0.00308	-0.000557
89.1	-0.00746	-0.000506	0.00423	0.00267	-0.00379	-0.00465	0.00585	0.0022		89.1	-0.00682	-0.00107	-0.00128	0.00762	-0.00323	-0.00432	-0.000117	0.00359
89.2	0.00616	8.64e-05	-0.00524	-0.00622	-0.00201	-0.00583	-0.00126	-0.00076		89.2	0.00147	0.00663	0.00109	-0.00779	-0.0056	-0.00373	0.00284	-0.00411
89.3	-0.00154	0.00127	-0.0011	-0.00859	-0.00083	0.00602	-0.00363	0.00339		89.3	-0.00801	-0.000479	-0.000686	-0.00246	-0.00383	0.00397	0.00166	-0.00589
89.4	-0.00213	-0.0011	-0.00465	-0.00266	0.00154	-0.00109	0.0023	0.00457		89.4	-0.0086	0.00367	-0.00128	0.00525	0.0021	0.00397	-0.00189	-0.0047
89.5	-0.000944	-0.00169	-0.0011	-0.00148	0.00213	-0.000501	0.00407	-0.00313		89.5	0.0068	-0.00107	-0.00306	-0.000678	0.00032	-0.00491	0.00462	0.003
89.6	0.000833	0.00246	8.7e-05	-0.00977	-0.00498	-0.00109	0.00111	0.0022		89.6	0.00325	0.00308	0.00405	0.00288	-0.000272	-0.00787	0.00344	-0.00648
89.7	-0.00272	0.00246	-0.00998	-0.00385	-0.00142	-0.00109	0.00348	0.00161		89.7	-0.000304	0.00308	0.00998	-0.00246	-0.00205	0.01345	-0.00189	0.00122
89.8	0.00853	0.00483	-0.00287	-0.00207	0.00509	-0.00228	0.0023	0.00457		89.8	-0.00801	-0.007	-0.000686	-0.00127	0.00328	-0.000765	-0.00782	-0.0053
89.9	-0.000352	0.00246	0.00186	0.000892	-0.00261	-0.00109	-0.00363	0.00279		89.9	0.00207	0.00663	-0.00246	0.00228	-0.00146	0.00042	0.00284	0.00181
90	-0.0045	-0.00288	0.0066	-0.00266	-0.00142	0.00542	-0.00303	0.000425		90	-0.000304	-0.000479	0.00405	-8.57e-05	-0.000272	0.00575	-0.00249	-0.00352
90.1	0.0038	8.64e-05	-0.00287	0.000892	0.00332	-0.01057	0.00467	0.00161		90.1	-0.00682	0.000706	0.01175	-0.00186	-0.000864	-0.00373	0.00166	-0.000557
90.2	-0.00391	0.00186	-0.0011	-0.00148	0.00391	-0.00169	-0.000665	0.00516		90.2	-0.00504	0.000113	-0.00365	-0.00186	0.00269	-0.000765	0.00107	-0.000557
90.3	-0.00924	0.00601	0.000679	0.00148	-0.00201	-0.000501	-0.0054	0.00279		90.3	-0.00445	0.000706	0.00168	-0.00186	0.0021	0.00575	0.00166	-0.0053
90.4	-0.00628	0.00542	-0.00287	0.00148	-0.00201	0.00246	0.00348	-0.00313		90.4	-0.00208	-0.00285	-9.35e-05	-0.00186	-0.00323	-0.00136	0.00225	-0.00174
90.5	0.00202	-0.00584	0.00483	-0.00325	-0.00379	-0.00287	-0.0054	-0.00135		90.5	-0.00445	0.0013	-0.00187	-0.00542	0.00032	-0.00491	0.00699	-0.00411
90.6	-0.00628	-0.000506	-0.00643	-0.00444	0.000355	-0.00346	-0.000665	0.0022		90.6	-0.00267	-0.000479	0.00287	0.00347	0.0021	0.00575	-0.00782	-0.000557
90.7	0.000833	-0.00169	-0.00465	0.000892	-0.0032	0.00128	-0.00244	0.0022		90.7	-0.00149	0.000113	0.00109	0.00643	-0.0056	0.00575	-0.00189	-0.000557
90.8	-0.00687	-0.00939	-0.00465	-0.00266	-0.00201	-0.00228	-0.00363	0.00457		90.8	-0.00919	0.00248	0.00524	-0.000678	0.00328	0.00042	0.00344	-0.00115
90.9	-0.00509	0.00127	0.00127	0.000892	0.000355	-0.00346	0.00052	0.00279		90.9	0.00266	-0.00344	-0.00306	-8.57e-05	-0.00146	0.0016	0.00225	-0.00233
91	0.00498	0.01016	-0.00228	0.00148	-0.00261	-0.00346	0.00407	0.00398		91	-0.000304	0.00248	0.00465	-0.00305	-0.00679	0.00279	0.00758	-0.00115
91.1	-0.00568	0.00305	-0.00228	0.000299	-0.0032	0.00246	0.00348	-0.00135		91.1	-0.00149	0.00544	0.000499	-0.000678	0.00447	-0.00669	-0.0013	-0.0053
91.2	0.00202	-0.00643	0.00364	-0.000293	-0.000237	0.00187	0.00052	-0.00313		91.2	-0.00445	0.000706	-0.00246	-0.000678	0.0021	-0.000765	0.000475	3.53e-05
91.3	-0.00746	-0.000506	8.7e-05	-0.00325	-0.00557	0.00365	-0.0054	0.0022		91.3	-0.0086	-0.00226	0.00109	-0.00364	-0.000864	0.00575	0.00225	0.000628
91.4	0.0032	0.00127	-0.0011	-0.00207	-0.000237	0.00187	-0.00244	-0.00194		91.4	-0.00386	0.00426	-0.00246	-8.57e-05	-0.00442	-0.00136	-0.00189	0.0024
91.5	-0.0045	-0.000506	0.00305	-0.000885	0.00213	-0.000501	-0.0054	0.000425		91.5	-0.01156	0.00308	0.00642	-0.00127	-0.00205	0.0016	0.00107	0.00418
91.6	-0.00272	-0.00524	0.00483	-0.000293	-0.00201	-0.00109	0.00348	-0.00313		91.6	-0.01037	-0.00759	0.00465	-0.00186	0.0021	0.0022	-0.00249	-0.00352
91.7	-0.000944	-0.00524	-0.00287	-0.00444	-0.00498	0.00246	-0.00363	0.00102		91.7	0.00503	0.000706	-0.000686	0.00584	-0.00679	-0.00669	0.00403	-0.00589
91.8	-0.00331	-0.00465	0.000679	-0.000293	0.00332	0.00187	-0.00185	0.00516		91.8	-0.000304	0.00308	-0.000686	-0.00423	-0.00383	0.00042	-0.0013	-0.00174
91.9	-0.000944	-0.0011	-0.00169	-0.0074	-0.00972	0.000684	-0.00422	0.00339		91.9	-0.000304	-0.00285	0.000499	0.0011	0.00624	0.00457	0.00995	-0.00115
92	-0.00272	0.00186	-0.00465	-0.00266	-0.00438	-0.00169	0.00704	-0.00254		92	-0.00564	-0.00107	0.00701	0.00228	0.00506	0.00101	0.00403	-0.000557
92.1	-0.000944	0.00423	0.000679	0.00741	-0.00261	0.00246	0.00289	-0.00313		92.1	-0.00208	0.000706	-0.00661	-0.00186	-0.00916	-0.00313	-0.00545	-0.000557
92.2	-0.00746	-0.00347	-0.000505	-0.00207	0.00154	0.00424	-0.00481	-0.00313		92.2	-0.000897	0.000113	-0.00483	0.00406	0.00032	0.00338	-0.00249	0.000628
92.3	-0.00154	-0.00406	-0.00228	-0.00207	-0.00261	0.000684	-0.00185	0.00102		92.3	-0.00682	-0.00581	-0.00365	-0.00542	-0.000864	0.00812	0.000475	0.00477
92.4	-0.00331	-0.00169	-0.00643	-0.00266	-0.00142	9.17e-05	-0.00126	0.00457		92.4	-0.01571	-0.00107	0.00109	-8.57e-05	-0.000864	-0.00254	0.00166	-0.00293
92.5	0.000833	-0.00406	0.000679	0.00385	-0.0032	-0.00169	-0.00481	0.00516		92.5	-0.00386	0.000706	-0.00128	-0.00305	0.00151	0.00042	-0.00071	-0.00826
92.6	-0.00509	0.00364	0.00127	-0.00503	-0.00261	0.00305	0.00348	-0.00135		92.6	0.00503	0.00248	0.00524	-0.000678	-0.00857	0.0022	0.00225	3.53e-05
92.7	-0.00628	-0.00524	0.00305	0.000299	-0.00261	0.00542	-0.0054	-0.00135		92.7	-0.00208	-0.000479	0.00642	0.00465	0.00032	-0.000765	-0.00071	0.01188
92.8	0.000241	-0.000506	-0.00465	-0.00325	-0.00261	-0.00346	0.00052	0.00635		92.8	-0.00741	-0.00285	-0.000686	0.00228	-0.000864	0.00042	0.00107	0.00418
92.9	-0.0045	0.00127	0.00186	0.000299	-0.00201	-0.000501	0.00052	-0.00313		92.9	0.00384	-0.00226	0.000499	0.00288	0.00387	0.00397	0.00403	-0.0124
93	-0.00154	-0.000506	-0.00761	-0.00977	-0.00201	9.17e-05	-0.00363	-0.00431		93	0.00207	-0.0064	0.00109	0.00169	-0.00442	0.00279	-0.00308	0.003
93.1	-0.00509	-0.00524	8.7e-05	-0.00325	-0.00557	0.00128	-0.00363	0.00161		93.1	0.00799	0.00308	-0.00898	-0.000678	-0.00323	0.0016	0.00225	-0.00293
93.2	-0.00687	-0.0011	0.00305	0.00267	-0.0032	-0.00109	-0.000665	0.00516		93.2	-0.00149	0.000113	0.00524	-0.00423	-0.00146	0.00279	0.00462	-0.0047
93.3	-0.01338	0.00483	-0.00821	-0.00799	0.0045	0.00542	0.00348	-0.00076		93.3	-0.00623	-0.00107	0.00109	0.00228	-0.00323	0.0022	-0.00426	0.00477
93.4	-0.00746	-0.00702	0.00838	0.00504	-0.00438	-0.000501	0.00111	-0.00194		93.4	-0.00682	-0.0064	-0.01194	-0.00423	0.00387	0.00812	-0.00426	0.003
93.5	-0.0045	-0.00288	0.00483	-0.000885	0.00213	0.00365	-0.00955	-0.00668		93.5	-0.000304	0.00544	0.00405	0.0011	-0.00442	-0.00136	0.000475	-0.00293
93.6	-0.01101	-0.00288	-0.00821	-0.00562	-0.00201	0.00602	0.0017	0.0022		93.6	0.00207	0.0013	0.0082	-0.00186	0.00151	0.00042	0.00344	-0.00648
93.7	-0.000944	-0.00761	0.000679	-0.00385	-0.00972	-0.000501	-0.00244	-0.00491		93.7	-0.00149	-0.00463	-0.00483	-0.00246	-0.00738	-0.0055	-0.00071	0.00537
93.8	0.00616	-0.00524	-0.00169	0.00148	-0.00379	-0.00524	-0.00303	0.0022		93.8	-0.01097	0.00426	-0.00602	0.00406	-0.0056	0.00279	0.00225	0.00477
93.9	0.0038	-0.00288	0.00186	0.00504	-0.000237	-0.00346	-0.00244	-0.00135		93.9	-0.00504	0.00544	0.00168	0.00228	0.00151	0.00397	0.00166	0.00122
94	-0.00509	0.000679	0.00364	-0.00444	-0.00616	0.00483	0.00467	0.00457		94	-0.0086	-0.00877	-0.00128	0.00465	-0.00264	0.00101	-0.00189	-0.00174
94.1	0.000241	-0.00288	-0.00228	0.00267	-0.00498	-0.00405	0.00644	0.00279		94.1	-0.00564	0.00485	0.00287	-0.00127	-0.00146	0.00101	-0.0013	-0.00411
94.2	-0.00154	0.00127	0.00186	-0.00266	-0.00083	0.00246	-0.00244	0.000425		94.2	-0.00801	-0.00226	-0.00542	0.0011	-0.00797	-0.000765	0.00166	-0.00174
94.3	-0.00628	8.64e-05	-0.00761	0.000892	0.00154	0.00838	-0.00244	0.00161		94.3	0.00088	0.00189	-0.00542	0.0011	0.00387	-0.0055	0.00284	-0.000557
94.4	0.00143	0.00483	-0.000505	0.000299	-0.00142	0.00365	-0.00481	0.00161		94.4	-0.00327	0.000706	-0.000686	0.00288	0.000913	0.01049	0.00462	0.0024
94.5	-0.00924	-0.00169	0.00483	-0.00266	-0.0032	0.00602	-0.00185	-0.00313		94.5	-0.00741	-0.00818	-0.0072	-0.00542	0.000913	0.0099	-0.00249	0.00596
94.6	-0.00272	-0.00347	-0.00702	-0.000885	-0.00083	0.00128	0.00348	-0.000168		94.6	0.0068	0.000706	0.000499	0.00702	-0.00442	0.00042	0.00462	0.00122
94.7	-0.00213	-0.00465	0.00127	0.00208	0.000355	0.00246	-0.0054	-0.00254		94.7	-0.000897	-0.00581	-0.000686	-0.00779	-0.00146	0.00397	0.00581	0.0024
94.8	0.000833	0.00364	-0.00584	0.00208	-0.0032	-0.000501	-0.000665	0.00279		94.8	0.00088	0.009	-9.35e-05	0.00465	-0.000864	-0.00254	0.00225	-0.00648
94.9	0.000833	8.64e-05	0.00246	-0.00148	-0.00616	0.00128	0.0017	-0.00076		94.9	-0.000304	0.00426	-0.00306	0.00584	-0.0056	0.00694	-0.00249	-0.000557
95	-0.00154	-0.00347	-0.00228	-0.00503	-0.00675	0.000684	-0.000665	-0.0055		95	0.00088	-0.00403	0.00465	0.00347	-0.000864	0.0016	0.00758	-0.00115
95.1	0.0032	0.000679	8.7e-05	0.000299	-0.00616	0.00661	-7.27e-05	0.00339		95.1	-0.00208	0.0013	0.00405	-0.00127	0.0098	0.0016	-0.00249	-0.00411
95.2	0.00143	0.00186	0.00186	-0.00385	-0.00201	0.00246	-0.00126	0.00161		95.2	-0.00208	-0.000479	-0.00483	-0.00186	-0.000272	-0.00373	-0.00782	-0.00411
95.3	0.00143	-0.00524	-0.0011	0.00385	-0.00557	-0.000501	-7.27e-05	-0.00194		95.3	-0.00208	-0.00463	-0.00839	-0.00601	-0.0062	0.0022	0.00166	-0.00115
95.4	0.0032	-0.00347	-0.00228	0.000892	-0.00083	0.00128	0.00111	-0.000168		95.4	-0.0086	-0.00107	0.000499	0.0011	0.00032	-0.00195	-0.00426	0.000628
95.5	-0.00509	0.00305	8.7e-05	-0.00503	-0.00201	9.17e-05	-0.006	-0.00431		95.5	-0.00327	-0.01292	0.00109	0.00288	-0.01271	0.0022	-0.00723	0.00774
95.6	-0.00154	-0.00228	0.000679	0.00208	-0.00498	0.00305	-0.00126	-0.00313		95.6	-0.01452	0.00248	0.000499	-0.000678	0.00684	0.00279	0.00581	0.00122
95.7	0.000833	-0.00524	-0.00287	-0.000293	-0.00557	-0.00169	0.0023	-0.00254		95.7	-0.00208	-0.00344	-9.35e-05	-0.00305	-0.00916	0.00279	0.00581	0.0024
95.8	-0.000352	0.00305	-0.00228	-0.00859	-0.00261	0.00602	0.0023	0.00516		95.8	0.00384	-0.000479	-0.00246	-0.00482	0.00151	0.0016	0.000475	3.53e-05
95.9	0.00853	8.64e-05	-0.00761	0.00504	-0.00083	-0.00405	-0.000665	0.00279		95.9	0.00858	0.0013	-0.00483	-8.57e-05	0.00387	0.00575	-0.00308	-0.00944
96	-0.000352	-0.000506	0.00364	-0.00325	0.000355	0.00483	0.0017	-0.00372		96	-0.00741	0.000706	-0.00246	-0.00956	0.0021	-0.00373	0.00403	0.00596
96.1	0.00143	-0.00643	0.00246	0.00445	-0.00735	0.00602	0.00111	-0.00076		96.1	-0.01215	0.0013	0.00405	0.00288	-0.00797	0.0016	0.00284	0.0024
96.2	0.0032	-0.00228	-0.000505	0.00385	-0.00557	-0.00109	-0.00422	0.00161		96.2	0.0068	-0.00403	0.00109	0.00406	-0.00146	0.00457	-0.00841	0.00714
96.3	-0.00331	-0.00288	-0.0011	0.000892	-0.00261	-0.000501	0.00052	-0.00372		96.3	-0.00978	-0.00285	0.00109	-0.00246	0.01158	0.00101	-0.00841	0.0024
96.4	0.0032	0.00364	0.000679	0.00148	-0.00972	9.17e-05	-0.000665	-0.00668		96.4	-0.00564	-0.01114	-0.01135	0.0011	0.00151	-0.0055	-0.00249	0.00359
96.5	0.00202	0.00364	-0.000505	-0.00148	-0.0032	0.00424	-0.00185	-0.00372		96.5	0.0068	0.00426	-9.35e-05	0.00465	-0.00916	0.0022	-0.00367	0.00181
96.6	-0.00746	-0.00584	-0.000505	0.00148	0.000948	0.00424	0.00111	-0.00135		96.6	0.00266	0.00248	-0.00187	0.00406	-0.00205	0.00101	0.00403	3.53e-05
96.7	-0.000944	-0.000506	-0.00169	-0.00385	-0.01208	-0.00169	0.00348	-0.00787		96.7	-0.00445	0.00604	-0.00424	0.00406	-0.00146	0.00812	0.00284	0.003
96.8	-0.00331	-0.00821	-0.0011	0.00326	-0.00201	-0.00642	0.00348	-0.00135		96.8	-0.00386	-0.01647	-0.00128	0.0011	-0.00797	0.00042	-0.00071	0.0024
96.9	-0.00331	-0.00406	0.00601	0.00267	-0.00379	0.00779	-0.00126	0.00398		96.9	0.0074	0.000113	0.00346	-8.57e-05	0.000913	0.00457	0.00107	-0.00293
97	-0.00331	0.00305	0.00127	0.00445	-0.0032	0.00187	-0.00126	-0.000168		97	-0.00623	-0.000479	-9.35e-05	-0.00246	-0.01212	0.00101	-0.000117	0.003
97.1	0.00202	-0.00821	-0.00287	-0.000885	-0.00794	-0.00405	-0.00185	-0.00254		97.1	0.000288	0.0013	-0.000686	-0.000678	0.00032	0.00753	-0.00426	0.00418
97.2	-0.0045	-0.0011	8.7e-05	-0.00266	-0.00083	0.0072	-0.006	0.000425		97.2	-0.00741	-0.00403	-0.00187	-0.00186	-0.00797	-0.00136	-0.0013	-0.00352
97.3	0.000833	-0.0011	0.000679	-0.00207	0.00154	0.00128	-0.00185	-0.000168		97.3	0.0068	-0.00877	-9.35e-05	0.00228	0.00743	0.00101	-0.00367	0.00833
97.4	-0.000352	-0.00169	-0.0011	0.00326	-0.00675	-0.00109	-0.00126	0.00339		97.4	-0.000897	0.01315	0.00228	0.00584	-0.0056	0.0016	0.000475	-0.000557
97.5	-0.01042	0.00186	0.00305	0.00741	-0.00794	0.00305	0.0023	-0.00313		97.5	-0.00623	-0.00107	-0.01016	0.00465	-0.00442	-0.00195	0.01114	0.00774
97.6	-0.00924	-0.00347	0.000679	0.00326	-0.00261	0.00779	0.0017	-0.00254		97.6	0.000288	-0.00759	-0.00187	0.00584	-0.000272	-0.00136	-0.00545	0.00537
97.7	-0.00272	-0.000506	-0.00584	0.00385	-0.00557	-0.000501	0.00052	0.00161		97.7	-0.00564	-0.00226	0.00405	0.0011	0.00151	0.00101	0.00581	-0.00352
97.8	-0.01398	-0.00584	-0.000505	0.00326	-0.000237	0.00246	-0.0054	-0.00372		97.8	0.00562	0.00426	0.00109	-0.00423	-0.000864	0.0099	0.00166	0.000628
97.9	-0.00687	-0.00524	0.00364	0.00385	-0.000237	0.000684	-0.00185	0.00161		97.9	-0.000897	0.00426	-0.00779	0.00406	0.00269	-0.0061	0.000475	-0.0047
98	-0.00509	0.00186	0.00246	-0.00148	-0.00201	0.00542	-7.27e-05	0.000425		98	-0.00978	-0.00996	-9.35e-05	0.00406	0.00447	0.00338	0.00462	-0.00707
98.1	-0.00746	-0.00169	0.00127	0.000299	-0.00083	9.17e-05	-0.00185	0.0022		98.1	0.00621	0.00248	-0.00839	-0.00482	-0.00916	-0.000173	0.00166	0.00537
98.2	-0.00805	-0.00169	-0.00228	0.00267	-0.00794	9.17e-05	0.00407	-0.00254		98.2	-0.00208	-0.00107	-0.00661	-0.00364	-0.00264	-0.00136	-0.0096	-0.000557
98.3	-0.000944	-0.000506	-0.00169	0.00504	-0.00083	-0.000501	0.0023	-0.00609		98.3	-0.01156	0.00308	0.00524	-0.00127	-0.00679	0.00397	-0.00071	0.003
98.4	-0.0045	-0.000506	0.00364	0.00208	-0.00379	0.00365	-0.00303	-0.00076		98.4	0.00503	0.00189	0.00228	-0.000678	0.00506	-0.00254	0.00166	0.00418
98.5	-0.00805	-0.00643	-0.00406	0.00504	-0.0032	-0.00405	-0.00185	-0.00254		98.5	0.00207	-0.00107	-0.00365	-0.00423	0.00387	0.00279	-0.000117	0.00122
98.6	-0.0045	8.64e-05	-0.000505	-0.00503	0.000355	0.00365	0.00585	-0.00194		98.6	-0.00445	-0.00581	-0.00661	0.0011	0.00151	0.01108	0.000475	3.53e-05
98.7	-0.01042	-0.00169	0.00305	0.00208	-0.00083	-0.00405	0.00052	-0.00135		98.7	-0.00386	-0.00107	-0.00246	0.00762	0.00032	0.00101	0.00344	0.00122
98.8	-0.00924	0.00423	0.00542	0.00741	-0.00557	-0.00346	0.00348	-0.00254		98.8	0.000288	0.00426	0.00642	-0.000678	-0.00146	-0.01202	0.00107	0.00714
98.9	-0.00391	0.00186	-0.00169	-0.00444	-0.00853	-0.00109	0.00526	-0.00194		98.9	-0.000897	0.00308	-9.35e-05	-0.00423	-0.00383	0.00634	-0.00486	0.00418
99	-0.00864	-0.00288	-0.000505	0.00208	-0.0032	0.00661	0.00467	-0.00194		99	0.00325	-0.0064	-0.00365	0.00288	0.00447	0.00338	-0.0013	-0.00411
99.1	-0.00391	-0.00761	-0.0011	0.00385	-0.00142	-0.000501	-0.000665	0.00279		99.1	-0.00801	0.000706	-0.00661	0.00169	-0.00501	-0.00432	-0.00249	0.003
99.2	0.000241	-0.0011	0.00305	0.00208	-0.00261	-0.000501	-0.00363	-0.00431		99.2	-0.00327	0.00189	0.00642	-0.00364	0.00506	0.00279	0.00758	0.000628
99.3	-0.00746	-0.00465	0.00246	0.00148	-0.00912	0.00365	-0.00185	-0.00254		99.3	0.000288	-0.00344	-0.00306	0.00406	0.00269	0.00812	-0.01137	0.00418
99.4	0.000241	0.000679	-0.00643	0.00918	0.000355	-0.00346	0.00289	0.0022		99.4	-0.00682	0.000706	-0.00246	-0.00246	-0.00797	0.00338	-0.00308	0.00537
99.5	-0.00924	-0.00288	8.7e-05	0.00385	-0.000237	0.00128	-0.00244	0.00102		99.5	0.00147	-0.00403	0.00405	0.00525	0.00269	-0.000173	-0.00308	-0.00293
99.6	-0.00509	-0.00169	0.00364	0.00385	-0.0032	-0.00702	-0.000665	-0.00254		99.6	-0.00386	0.000113	-0.00246	0.0011	0.00151	-0.0061	0.00344	0.00892
99.7	-0.00272	-0.00169	0.01134	0.00326	-0.00379	0.00305	-0.00363	-0.00313		99.7	0.00266	0.00367	-0.00187	-0.00246	0.00565	0.00812	0.00166	0.0024
99.8	-0.0045	0.00542	0.00483	-0.00325	-0.00498	-0.000501	-0.00303	-0.00431		99.8	0.00147	-0.00166	-0.00424	0.00465	0.00032	-0.00254	-0.00604	0.00122
99.9	0.00143	-0.0011	0.00246	0.00385	-0.000237	0.00602	-0.0054	-0.00313		99.9	-0.00386	0.000706	0.00346	-0.000678	-0.00264	-0.00195	0.00344	3.53e-05
100	-0.00509	0.000679	0.00364	-0.000885	-0.00142	-0.00287	0.00526	-0.000168		100	-0.00564	0.00189	-0.00306	0.00465	-0.00264	-0.000765	-0.00426	0.000628
100.1	-0.00509	8.64e-05	-0.00524	0.000299	0.00509	-0.00465	0.0017	-0.00313		100.1	-0.00327	-0.00996	0.00642	0.00347	0.00506	-0.00254	0.00284	-0.00115
100.2	-0.01279	-0.00465	0.00186	-0.000885	-0.00498	0.00246	0.00348	-0.00254		100.2	-0.00623	-0.00226	-0.00957	-0.000678	-0.000272	-0.00254	0.00462	0.0024
100.3	0.000833	0.00186	8.7e-05	-0.000885	-0.000237	0.00424	0.0023	0.0022		100.3	0.00799	0.00308	-0.000686	0.00406	0.00032	-0.00373	-0.00071	0.00122
100.4	0.00202	-0.00169	0.00364	0.00445	-0.00261	-0.000501	0.0023	0.00576		100.4	0.00207	0.00485	-0.00128	-0.000678	-0.00738	0.00753	-0.00071	3.53e-05
100.5	-0.000352	-0.00288	0.0066	0.00267	-0.00498	-0.00228	0.00644	-0.00194		100.5	-0.00327	0.000706	-0.00306	0.0088	0.00802	-0.00254	-0.00604	3.53e-05
100.6	-0.0122	8.64e-05	0.00186	0.00208	-0.000237	-0.000501	0.00467	-0.00491		100.6	0.00207	-0.00581	0.00109	0.00525	-0.000864	0.00042	-0.000117	0.0024
100.7	-0.00628	8.64e-05	0.0072	0.00267	0.000948	0.000684	0.00111	-0.00313		100.7	-0.000304	0.00604	-0.00187	0.00584	0.00328	0.0016	0.000475	-0.00233
100.8	-0.00272	0.00246	0.00483	0.00208	-0.00735	-0.000501	0.00348	-0.00254		100.8	-0.00208	0.00485	-0.00246	0.00406	-0.00264	-0.00491	-0.00426	0.0024
100.9	-0.00746	-0.00702	0.00305	-0.000293	0.00272	-0.00465	0.00289	-0.00254		100.9	0.00858	0.000706	0.00701	-0.000678	-0.00797	0.00575	-0.00486	0.00833
101	-0.00864	8.64e-05	0.00779	0.00385	-0.00142	0.000684	-0.00126	0.000425		101	-0.000897	0.0013	0.00287	-0.00186	-0.00205	0.00457	0.00284	-0.00293
101.1	-0.00331	-0.00288	0.0072	0.00267	-0.0032	-0.000501	0.00052	-0.000168		101.1	-0.00445	-0.00226	-0.00661	-0.00246	0.00151	0.00338	0.00166	-0.00293
101.2	-0.0045	-0.000506	0.00779	-0.00325	-0.00142	-0.00346	0.0023	-0.00313		101.2	0.00503	-0.00285	0.00701	0.00288	-0.000272	0.0016	-0.00308	0.00418
101.3	-0.00687	0.00127	-0.00406	0.00445	0.00213	0.00128	-0.000665	-0.00194		101.3	0.00266	0.000113	0.00109	0.0011	0.0021	0.0016	-0.0013	0.00537
101.4	-0.00628	0.00305	-0.00169	0.00445	-0.00557	-0.00405	0.00111	0.00161		101.4	0.01332	0.00722	-0.000686	0.00406	0.0021	-0.0061	-0.00545	0.000628
101.5	-0.00628	-0.00169	0.00246	0.000892	-0.00379	-0.000501	0.00585	0.00279		101.5	0.00147	0.0013	-0.00128	-8.57e-05	0.00269	-0.000173	0.00284	-0.00826
101.6	-0.0045	-0.00465	-0.000505	0.00385	0.00628	-0.00228	-7.27e-05	0.00161		101.6	-0.00801	0.00308	-9.35e-05	0.00525	0.00032	-0.000173	0.00225	0.003
101.7	-0.00509	-0.000506	0.00127	-0.000293	-0.00261	0.00305	0.0017	-0.00076		101.7	-0.00267	-0.00403	-0.00128	0.00406	-0.0062	0.00575	-0.0013	0.01011
101.8	-0.00568	0.00364	0.000679	0.00445	0.000948	-0.00346	-0.000665	-0.00135		101.8	-0.000304	-0.00285	-0.00128	-0.00601	0.00861	0.00042	-0.00189	-0.0047
101.9	-0.0122	0.00127	0.00186	0.00208	0.000948	0.00246	0.00704	0.00161		101.9	0.00384	-0.00285	-0.00365	-0.00364	-0.00679	-0.00787	-0.00486	-0.000557
102	-0.01338	0.000679	8.7e-05	-0.000885	-0.0032	-0.00109	0.00704	-0.00254		102	0.00325	0.00367	-0.00306	0.00228	0.0098	0.00042	-0.00723	-0.000557
102.1	-0.00746	-0.00465	0.01016	0.000892	0.000355	-0.00702	0.0017	-0.00194		102.1	0.00917	0.000706	0.00583	-0.00127	0.000913	-0.00254	-0.000117	-0.00115
102.2	-0.00272	-0.00228	0.00423	0.00445	0.00569	0.00187	0.00407	-0.00491		102.2	0.00325	-0.00522	0.00287	0.000507	-0.0056	-0.00373	-0.00071	-0.00352
102.3	-0.00687	-0.000506	-0.00287	-0.00503	-0.00083	-0.00169	0.00526	0.000425		102.3	0.00384	0.000706	-0.00365	0.00288	0.00269	0.00042	-0.00308	-0.0053
102.4	-0.01279	-0.000506	0.00246	0.00445	-0.00616	-0.00465	0.00348	0.000425		102.4	0.00384	0.00426	-0.00187	0.00347	0.00151	-0.00254	0.00581	0.00774
102.5	-0.0045	0.00305	-0.00287	0.00445	0.00272	0.000684	0.00052	-0.00254		102.5	0.00266	0.0013	-0.00187	0.00525	0.00684	0.00101	-0.00782	0.01011
102.6	-0.01338	-0.00288	0.00305	-0.000293	0.00391	0.00365	0.00941	-0.00076		102.6	0.000288	-0.0064	0.00346	0.0011	0.00151	0.00634	-0.00486	-0.00174
102.7	-0.00805	8.64e-05	0.00364	0.00682	0.00509	9.17e-05	0.00111	-0.00135		102.7	0.00503	0.000706	0.00168	0.00347	0.00684	-0.00432	-0.00071	-0.00411
102.8	-0.00924	0.00127	0.0066	-0.00207	-0.00201	0.00128	0.00111	0.00161		102.8	0.00266	-0.00107	0.00228	0.00228	-0.00264	-0.000765	-0.00189	-0.00174
102.9	-0.00924	-0.00347	0.00483	0.00504	0.000355	-0.00228	-7.27e-05	-0.00372		102.9	0.00147	0.00308	-0.00128	0.00288	0.00387	0.0016	0.000475	0.00714
103	-0.00568	0.00186	-0.00169	-0.00325	0.00391	-0.00169	-0.00126	-0.00194		103	0.00384	-0.00285	-0.00306	0.0011	0.00387	-0.00728	-0.0013	0.00655
103.1	-0.00568	-0.00406	0.0072	0.00385	0.00213	-0.00465	0.00763	0.00872		103.1	0.00621	0.00663	-0.00542	-0.0066	-0.00679	-0.00254	-0.000117	-0.00648
103.2	-0.000944	0.00127	-0.0011	-0.000885	-0.00201	-0.00405	0.00289	-0.00076		103.2	-0.00504	-0.00285	-9.35e-05	-0.00482	-0.00383	-0.00136	-0.000117	0.003
103.3	-0.00213	-0.00406	0.00127	0.00267	-0.00142	-0.00109	0.0023	-0.00313		103.3	0.00917	-0.00344	0.00405	0.00525	0.00861	0.0016	0.00166	0.00596
103.4	-0.00509	0.00246	0.0066	0.008	-0.00261	0.00128	0.00822	0.00516		103.4	0.00799	0.00248	0.00168	0.00228	0.00684	0.0016	-0.00189	0.003
103.5	-0.000944	-0.00347	0.0072	0.00326	-0.000237	-0.00702	0.00289	-0.00194		103.5	-0.000897	-0.00226	-9.35e-05	0.0011	0.00151	0.0022	-0.00189	-0.00115
103.6	0.00261	-0.00169	0.00186	-0.00325	0.00213	0.00542	0.00585	0.00279		103.6	0.00325	0.00367	0.00642	-0.00246	0.00032	-0.0061	0.00403	0.00359
103.7	-0.01101	-0.00524	0.00601	0.00385	-0.00379	9.17e-05	0.00052	-0.00491		103.7	0.000288	-0.00463	-0.00365	-8.57e-05	0.0021	-0.00373	-0.00308	-0.00233
103.8	-0.01161	0.000679	-0.000505	0.00208	0.000355	-0.000501	0.00348	-0.00254		103.8	-0.00386	-0.00285	-0.000686	0.00228	0.00624	0.00338	-0.00545	0.00418
103.9	-0.00391	-0.00347	0.000679	0.000892	-0.0032	9.17e-05	0.00407	-0.00135		103.9	0.0074	0.00485	0.00465	0.00465	-0.00146	-0.000173	-0.0096	0.0024
104	-0.01457	-0.00347	0.00305	-0.00148	0.00569	0.00305	0.00763	-0.0055		104	0.00799	0.0013	0.00168	0.0011	0.00328	0.0022	-0.00486	-0.00707
104.1	-0.00509	-0.000506	0.00305	0.00385	-0.0032	9.17e-05	-7.27e-05	0.00457		104.1	0.0068	0.01137	-0.00365	-0.000678	0.0021	-0.0055	-0.00189	0.00181
104.2	-0.01101	-0.00761	0.00364	0.00385	-0.00379	-0.00642	-0.00126	-0.00194		104.2	-0.000304	0.000113	0.00346	0.00406	0.00269	-0.00136	-0.00545	0.00359
104.3	-0.00628	-0.000506	0.00305	-0.000293	-0.00261	-0.00524	-0.00244	0.00457		104.3	0.00266	-0.00759	0.00583	-0.00482	0.00624	-0.00254	0.00462	-0.00648
104.4	-0.00331	0.00305	0.00423	-0.00444	0.00213	-0.00109	0.00704	0.00516		104.4	-0.00267	0.00485	-0.000686	-0.00482	-0.00916	-0.0055	-0.00249	-0.00174
104.5	-0.00805	-0.00524	0.00423	0.00741	-0.0032	0.00483	0.00289	-0.00076		104.5	-0.00741	-0.00344	-0.000686	0.00702	-0.00205	0.0022	0.00107	0.00359
104.6	-0.0045	-0.00169	0.00364	-0.000293	0.00391	-0.000501	0.00052	-0.00491		104.6	0.00977	0.009	-0.00602	-0.00719	0.00565	-0.000765	0.000475	-0.00352
104.7	-0.00391	0.00186	0.000679	0.00148	-0.00083	-0.00465	0.00644	-0.00194		104.7	0.00799	0.00189	0.0082	0.01058	0.00447	0.0016	-0.00545	-0.0053
104.8	-0.00805	-0.00524	-0.000505	-0.00266	-0.00083	0.000684	0.00585	0.00516		104.8	-0.00682	-0.00107	-0.00779	0.00228	-0.00323	-0.000173	-0.00663	0.00596
104.9	-0.0045	0.00186	-0.00584	-0.00207	-0.000237	-0.00109	-0.000665	0.00279		104.9	0.00088	0.00722	-0.000686	-0.00601	0.0021	-0.00847	0.000475	0.00714
105	-0.000352	-0.00406	0.00838	0.00148	0.0045	-0.00642	-0.00244	0.00339		105	-0.00623	-0.000479	0.00642	-0.000678	-0.000272	-0.00136	-0.00189	0.00359
105.1	-0.00805	0.00305	0.00186	0.00267	0.000355	-0.00109	0.00526	0.0022		105.1	-0.00149	0.00367	0.00583	0.00347	-0.0056	0.00516	-0.0013	-0.0053
105.2	-0.00391	0.00246	0.00423	-0.000293	-0.000237	-0.00405	0.00052	-0.00254		105.2	-0.00386	0.00544	0.000499	-0.00127	-0.0056	-0.00136	-0.00249	-0.00174
105.3	-0.00568	-0.000506	0.00364	0.000299	0.00391	-0.00642	0.00348	0.0022		105.3	-0.000897	0.00367	-0.00424	-0.000678	0.00447	-0.01202	-0.0096	0.00181
105.4	-0.000944	-0.00169	0.00186	0.00682	-0.00083	9.17e-05	0.00763	0.000425		105.4	-0.00208	0.00663	0.00228	0.00169	0.000913	0.00694	-0.00308	0.00359
105.5	0.00202	0.00364	8.7e-05	-0.00799	-0.00261	0.00365	0.00704	0.0022		105.5	0.00147	-0.00226	0.00405	-0.00364	-0.000864	0.00338	0.00344	0.00418
105.6	0.00202	-0.0011	8.7e-05	0.000299	-0.0032	-0.0082	-7.27e-05	-0.00254		105.6	0.01036	0.009	-0.00483	0.00525	0.00328	-0.000173	-0.01019	0.00596
105.7	-0.0045	0.00305	0.00423	0.00208	-0.000237	-0.00524	-0.006	0.00576		105.7	0.00503	0.00248	0.00405	0.00288	0.00151	0.00101	-0.00308	-0.0047
105.8	0.000833	0.00483	-0.00169	-0.00266	0.00569	0.00365	0.0023	0.00457		105.8	0.00266	0.00248	0.00761	-0.00246	-0.00442	-0.00432	-0.00071	-0.0053
105.9	-0.00272	-0.00406	-0.000505	-0.00266	-0.000237	-0.00109	-0.00126	0.000425		105.9	0.000288	0.00485	-0.00365	-0.00246	-0.00442	-0.0055	0.00166	-0.0124
106	0.00261	0.00186	0.0072	0.00148	-0.00261	-0.00879	0.0023	0.000425		106	-0.0086	0.000113	-9.35e-05	-0.00186	0.00624	-0.00136	-0.00189	3.53e-05
106.1	0.000833	-0.00169	-0.00169	0.00267	-0.00498	-0.000501	-0.000665	0.00872		106.1	-0.00327	-0.00166	0.00524	0.00465	0.0021	0.00516	-0.009	0.00596
106.2	-0.00154	8.64e-05	0.00127	0.00267	0.000355	-0.00583	0.00704	-0.00076		106.2	-0.00149	0.00722	-0.00602	0.00288	0.000913	-0.000765	-0.00426	-0.000557
106.3	0.00143	0.00423	8.7e-05	-0.00444	0.00272	-0.00228	0.00348	0.00516		106.3	0.00207	0.0013	-0.00128	-0.00542	-0.00797	-0.00432	-0.00723	0.000628
106.4	-0.00213	0.00305	0.00542	0.00208	-0.000237	-0.00169	-0.00303	0.00457		106.4	0.00266	0.000706	-0.00128	0.00643	-0.00205	0.00457	-0.00071	-0.00411
106.5	0.00202	-0.00406	0.00542	0.00148	-0.00201	9.17e-05	0.00289	0.00457		106.5	-0.00267	0.00189	-0.00187	-0.00423	-0.00146	-0.000765	0.00521	0.00359
106.6	0.00202	0.00364	-0.0011	0.00445	-0.00853	-0.000501	-0.00363	0.00635		106.6	0.00088	0.00426	-0.00246	-0.00956	-0.00205	-0.00136	-0.00782	-0.000557
106.7	0.00261	8.64e-05	0.00186	-0.00266	0.0045	-0.000501	0.00111	0.0022		106.7	0.000288	0.00426	-0.00187	0.00525	-0.00916	-0.00313	-0.00782	-0.0053
106.8	0.00853	-0.00702	-0.00465	0.000892	0.00746	-0.00465	-7.27e-05	-0.00254		106.8	0.00503	0.0013	0.00346	-0.00127	0.00151	-0.00669	-0.00071	-0.00352
106.9	-0.00687	-0.00347	-0.00169	0.00445	-0.00498	9.17e-05	-0.000665	0.00279		106.9	-0.000304	-0.000479	0.00287	0.00288	0.00387	0.00101	-0.00308	0.0024
107	-0.00568	-0.00702	0.0066	-0.000293	-0.00201	-0.00228	0.00644	0.00516		107	0.00325	0.00189	-0.00187	-0.00186	-0.00264	0.00516	-0.0013	-0.00648
107.1	-0.00628	0.00719	-0.000505	-0.00325	0.000355	0.000684	-0.00126	-0.000168		107.1	0.00799	0.00248	0.00465	0.00288	0.00506	-0.00136	-0.00249	3.53e-05
107.2	-0.0045	0.00305	8.7e-05	-0.00503	0.00806	0.00542	0.00467	0.00161		107.2	-0.00386	0.0013	-0.000686	-0.00779	-0.00738	-0.00195	-0.01019	0.00359
107.3	0.000241	-0.000506	-0.00643	-0.000885	-0.00794	-0.00524	-0.00126	-0.00254		107.3	0.01036	0.00544	-0.00246	-0.000678	-0.00264	-0.00906	-0.00189	-0.00233
107.4	-0.00568	-0.0011	0.00305	0.000892	-0.00379	-0.00287	-0.006	0.00398		107.4	-0.00149	0.00189	-0.00306	-0.00305	0.00506	-0.000765	0.00166	3.53e-05
107.5	0.00794	-0.000506	0.00542	0.00267	0.0045	-0.00169	0.00052	0.00161		107.5	0.000288	0.00189	0.01057	-8.57e-05	-0.00501	0.0022	-0.00367	-0.00293
107.6	0.01031	-0.0011	0.000679	-0.00266	-0.000237	-0.00169	0.00526	0.00339		107.6	0.00384	-0.00344	0.0082	0.000507	0.00269	-0.00254	-0.0013	0.00655
107.7	-0.00391	0.000679	0.00246	0.000892	0.00272	-0.00465	-7.27e-05	0.00576		107.7	0.00325	0.00544	0.00168	-0.000678	-0.00738	0.00753	-0.0013	-0.00233
107.8	0.00498	0.00127	0.00127	-0.000293	-0.00438	0.00246	-0.00126	0.00102		107.8	0.00621	0.00663	0.00701	0.00465	0.00624	0.00634	-0.000117	-0.00648
107.9	0.00498	8.64e-05	8.7e-05	-0.000293	-0.000237	0.00246	0.00407	0.00161		107.9	0.00147	-0.00166	-0.00365	0.00406	-0.000864	-0.00669	0.00166	-0.00352
108	0.00261	-0.000506	0.00186	0.000892	-0.00261	-0.00642	-7.27e-05	0.00516		108	0.00088	0.00248	0.00287	-0.00542	0.00506	0.00042	0.00521	0.0024
108.1	0.0032	0.00186	-0.0011	0.00208	0.00154	-0.00465	0.00052	-0.00313		108.1	0.00325	0.00248	-0.00898	-0.0066	0.00565	-0.00195	0.00225	-0.00944
108.2	0.00498	-0.0011	0.00483	0.000299	-0.00557	-0.00169	0.00704	0.00102		108.2	0.00266	-0.00107	-0.00542	-0.00542	-0.00442	0.00397	-0.00308	-0.00411
108.3	0.00143	0.00305	0.000679	-0.00325	0.00746	-0.00465	-0.00303	0.00694		108.3	0.00443	-0.00403	0.00761	0.00347	-0.00442	-0.00906	-0.00189	0.00122
108.4	0.00735	8.64e-05	-0.00287	0.00385	-0.000237	0.00424	0.00111	0.000425		108.4	-0.00267	-0.00166	0.00405	0.00406	-0.00383	0.0022	0.0064	3.53e-05
108.5	0.000833	-0.0011	0.00127	-0.000293	-0.000237	-0.00109	-7.27e-05	0.00339		108.5	-0.00564	0.0013	0.00168	0.00465	0.00565	-0.00195	-0.00426	-0.00174
108.6	-0.00746	-0.00465	-0.0011	-0.00266	0.00213	-0.00346	-0.00126	-0.00135		108.6	-0.00623	-0.00285	-0.000686	0.00228	0.000913	0.00634	-0.00367	-0.0053
108.7	0.000241	-0.00169	0.00246	-0.00207	0.000948	-0.00109	0.00052	-0.000168		108.7	0.00503	0.00189	0.00109	-0.00482	0.00506	-0.000765	-0.00308	0.0024
108.8	0.000833	0.00364	0.000679	-0.00385	0.00509	-0.00228	0.00407	0.00694		108.8	0.01273	-0.000479	-0.00187	-0.00186	-0.00442	0.0016	0.00107	-0.00174
108.9	0.000241	-0.0011	-0.00287	-0.00444	0.0045	-0.00169	-0.0054	0.00279		108.9	0.00207	0.00189	0.00287	-0.00127	-0.00797	-0.00254	0.00344	-0.00589
109	0.00616	0.000679	-0.00939	-0.00444	0.00509	-0.00169	-0.00126	-0.00431		109	-0.00327	0.00367	-9.35e-05	-0.00364	0.00387	-0.00669	0.00521	-0.00233
109.1	-0.00154	0.00483	0.00897	-0.000885	-0.0032	-0.000501	0.00585	0.00457		109.1	-0.00801	0.000706	-0.00187	0.00998	0.00151	0.00694	-0.01078	-0.0047
109.2	-0.00154	-0.000506	-0.0088	-0.000293	-0.0032	0.00246	-0.00363	0.00576		109.2	0.00088	0.00189	0.00346	0.00288	-0.00205	-0.000765	0.00699	-0.00707
109.3	0.00498	-0.00584	0.00127	0.00445	-0.000237	0.000684	-7.27e-05	0.0099		109.3	0.00562	-0.000479	0.00228	0.00288	-0.00146	0.00042	0.00581	-0.00767
109.4	0.00202	-0.0011	8.7e-05	-0.00385	0.00154	-0.00465	0.0023	0.00339		109.4	-0.00564	-0.00344	-0.00661	-0.00186	-0.000864	0.00101	-0.01019	0.00359
109.5	0.000833	-0.000506	0.000679	-0.00444	-0.000237	-0.00287	-0.00126	0.00457		109.5	-0.00208	-0.00581	0.000499	-0.00423	0.00506	-0.00136	-0.000117	0.003
109.6	-0.000944	0.00364	0.000679	-0.000885	-0.00379	0.00483	0.00111	0.00279		109.6	0.00384	0.00426	-0.00839	0.00169	0.000913	0.00042	0.00344	-0.00352
109.7	0.0038	0.00186	-0.00169	-0.00799	0.00154	-0.00109	-0.00481	-0.00609		109.7	0.01095	-0.00759	-0.00424	-0.000678	-0.00857	0.00042	0.00166	-0.00352
109.8	0.00143	-0.00524	-0.00287	0.00208	0.00569	-0.00169	-0.00185	-0.00254		109.8	-0.00149	-0.00107	-0.00661	-0.00127	-0.00264	0.00397	0.00403	3.53e-05
109.9	0.00143	-0.00702	-0.0011	-0.000885	0.00509	-0.00642	-0.00185	-0.00372		109.9	-0.00208	-0.00344	-0.01135	0.00525	0.00447	0.00101	-0.00723	-0.00648
110	-0.00746	0.00186	0.00483	-0.00148	0.00213	0.00542	0.00467	-0.00254		110	0.00325	-0.00463	-0.00602	-0.00127	0.00506	-0.00373	-0.00308	0.000628
110.1	-0.0045	-0.00406	-0.00584	0.00445	0.000355	0.00779	-0.00185	-0.00313		110.1	0.000288	0.00485	-0.00306	-0.00305	0.00387	-0.00136	0.00284	-0.00411
110.2	-0.00391	-0.00169	-0.00347	0.00445	-0.000237	-0.00702	-0.00837	-0.00491		110.2	0.00325	0.00367	-0.00779	-0.00482	0.00447	0.00101	0.00107	-0.00352
110.3	-0.00154	-0.00584	0.00186	0.000892	-0.00201	9.17e-05	0.00348	-0.00076		110.3	-0.00149	-0.00522	-0.00839	-0.00305	-0.00264	0.00042	0.00284	3.53e-05
110.4	-0.00272	0.00246	-0.000505	-0.00325	-0.00735	-0.00228	-0.0054	-0.00668		110.4	0.00621	0.00722	0.00168	0.00169	-0.00501	-0.00136	-0.00663	-0.00411
110.5	0.000833	8.64e-05	-0.00643	-0.00385	0.00391	-0.00405	-0.000665	-0.00313		110.5	-0.00267	-0.00344	-0.01253	-0.00542	-0.00264	0.00575	0.000475	-0.00352
110.6	0.000241	0.000679	0.00483	-0.0074	0.0045	0.000684	-0.00244	0.00753		110.6	0.00621	-0.00107	-0.00542	0.0011	0.00802	-0.00136	0.00344	3.53e-05
110.7	0.0038	-0.00524	-0.00465	-0.000293	-0.00735	-0.00169	-0.00481	-0.00431		110.7	-0.00267	-0.00344	-0.01016	0.00406	0.00506	-0.00373	-0.01019	-0.00174
110.8	0.000241	-0.000506	-0.00287	-0.00681	0.00509	-0.00583	0.0023	-0.000168		110.8	-0.00623	-0.00107	-0.01016	0.00228	0.00387	-0.00432	0.00462	-0.00885
110.9	-0.00154	0.00246	-0.00406	-0.000885	-0.0032	-0.00228	-0.00303	0.000425		110.9	0.0068	0.00367	-0.00306	-0.00719	-0.0056	0.00634	-0.00071	-0.00352
111	-0.00154	-0.00347	-0.00347	0.00208	0.000948	-0.00228	-0.000665	0.0022		111	-0.00327	0.00485	-0.01194	0.00288	-0.000272	0.00101	0.00284	-0.00115
111.1	0.00676	0.00305	0.00601	0.00267	0.00332	-0.000501	0.00585	-0.00076		111.1	0.00088	-0.000479	-0.00424	-0.00127	0.00032	0.00279	0.00521	3.53e-05
111.2	-0.00331	-0.0011	-0.00939	-0.00266	-0.00557	9.17e-05	-0.00659	0.00161		111.2	-0.000897	-0.00877	-9.35e-05	0.00288	0.0021	0.00397	0.00225	-0.00589
111.3	0.00439	-0.00288	0.000679	-0.00503	0.00332	-0.00228	0.0023	0.00516		111.3	-0.00801	0.009	-0.00839	-8.57e-05	0.00861	-0.00906	0.00818	0.00418
111.4	0.00794	0.00186	-0.00169	-0.00325	-0.00261	0.00365	0.00407	0.00931		111.4	0.00325	0.00959	-0.00128	0.00228	0.0021	0.01345	0.000475	0.0024
111.5	0.00261	-0.000506	8.7e-05	-0.00562	-0.000237	0.000684	0.00052	-0.00372		111.5	-0.000304	-0.00226	-0.00128	0.000507	-0.00738	0.00516	-0.00545	-0.00233
111.6	-0.00331	-0.00169	0.00127	-0.00918	0.000948	-0.000501	-0.00777	0.00279		111.6	0.00088	-0.00107	-0.00602	-0.0066	0.00506	-0.000765	-0.000117	0.00477
111.7	-0.00509	-0.000506	-0.00406	0.00148	0.00391	-0.00109	-0.00303	0.00635		111.7	0.00503	0.00248	-9.35e-05	-0.00838	0.00743	-0.000765	-0.00249	-0.01063
111.8	-0.00154	-0.00228	-0.00228	-0.00562	-0.00557	-0.00109	-0.00422	-0.0055		111.8	0.00147	0.000706	0.00109	0.00821	-0.00383	-0.00254	-0.0013	0.00122
111.9	-0.00391	-0.00169	0.00127	-0.000885	-0.00379	0.00246	0.00526	0.000425		111.9	-0.000304	-0.000479	-0.00542	0.00702	0.000913	-0.00136	0.00107	-0.00174
112	-0.00509	-0.00347	0.00127	0.000892	-0.00142	-0.00346	-0.00659	0.00635		112	0.00088	-0.00107	-0.00661	-0.00127	-0.00205	0.00457	0.00581	-0.0047
112.1	-0.000352	0.000679	-0.00287	0.00148	-0.000237	-0.00346	-0.00363	-0.0055		112.1	0.00266	0.00189	-0.01786	-0.00127	0.0021	-0.00136	-0.00071	3.53e-05
112.2	0.00143	-0.00406	8.7e-05	0.000892	-0.00083	9.17e-05	-7.27e-05	0.00161		112.2	-0.00149	0.0013	-0.00187	-0.00601	-0.0056	0.00694	-0.00071	0.00418
112.3	-0.00391	-0.00228	0.000679	-0.00385	-0.00261	0.00305	-0.00363	-0.000168		112.3	-0.00327	0.00485	0.00346	-0.00186	0.01098	-0.0132	-0.00189	-0.00885
112.4	-0.00924	8.64e-05	-0.00524	-0.00148	0.00154	-0.00524	0.0017	-0.00254		112.4	0.00325	0.00248	-0.00246	0.00228	0.00269	0.00457	-0.009	-0.00944
112.5	-0.000944	-0.0011	0.00246	-0.00622	-0.0032	-0.00109	-0.000665	-0.00194		112.5	-0.00386	-0.000479	0.00346	0.0088	0.00387	0.00871	-0.00308	-0.00293
112.6	-0.00746	-0.00288	-0.00524	-0.00503	0.000948	-0.00346	-0.00303	-0.000168		112.6	0.00147	0.00248	-0.00246	0.00762	-0.00323	-0.0061	0.00581	-0.00174
112.7	-0.01042	-0.00702	-0.00169	-0.0074	0.000948	-0.00169	-0.00718	-0.00135		112.7	-0.01334	0.000706	-0.00779	-0.00186	-0.00205	-0.00254	0.00107	-0.00589
112.8	-0.00509	-0.00584	-0.00465	0.00267	-0.00201	0.00187	0.00052	-0.00135		112.8	0.00384	0.0013	-0.00661	-0.00719	-0.000272	0.00634	0.00581	-0.00707
112.9	-0.00272	0.00779	0.00364	-0.00385	-0.00142	0.00246	-0.00363	-0.0055		112.9	0.0068	0.00485	0.00109	-0.00127	-0.00442	0.00042	-0.00189	0.003
113	-0.00628	-0.00288	-0.00643	0.000892	-0.0032	0.00305	-0.00363	-0.0055		113	0.00147	0.0013	-0.00128	-0.00364	-0.00323	0.00634	-0.00249	0.00122
113.1	-0.00272	-0.00702	8.7e-05	-0.00266	-0.00142	0.00246	0.0023	0.000425		113.1	-0.00682	-0.00226	-9.35e-05	0.00821	-0.00797	0.0016	0.00284	-0.00233
113.2	-0.00272	-0.000506	-0.00406	-0.000885	-0.00498	0.00365	-0.00244	0.000425		113.2	-0.00149	-0.00403	-0.00128	-0.00364	0.00506	-0.000173	0.00344	-0.00174
113.3	-0.00746	-0.00761	-0.00169	0.00385	0.00213	-0.000501	-0.00185	-0.00728		113.3	0.00325	-0.00581	0.00465	-0.00482	0.0021	0.00931	-0.01078	3.53e-05
113.4	-0.0122	-0.00347	0.00246	-0.000885	-0.00261	0.00246	-0.00244	-0.00194		113.4	0.000288	0.01196	-0.00306	-8.57e-05	-0.00146	-0.000173	0.00284	0.00537
113.5	-0.0122	-0.00347	0.00186	-0.00444	-0.00616	9.17e-05	-7.27e-05	0.000425		113.5	-0.00267	0.000113	-0.00306	-0.00305	-0.00442	0.00753	0.00581	0.000628
113.6	-0.00687	-0.00939	-0.00228	-0.00266	0.000948	-0.000501	-7.27e-05	0.00457		113.6	-0.000897	-0.00285	0.00346	0.000507	-0.00679	0.00575	0.00107	0.003
113.7	0.000241	-0.00465	-0.0011	0.00148	-0.00498	0.00424	0.00052	0.0022		113.7	0.00977	0.00308	-0.00187	0.0011	-0.00146	0.0022	-0.00723	-0.00174
113.8	-0.0045	-0.00465	0.00186	0.00267	-0.01031	-0.00524	-7.27e-05	0.00102		113.8	-0.00801	-0.00522	0.00287	-0.000678	0.000913	-0.00136	-0.0013	-0.00648
113.9	-0.00805	-0.00465	-0.00702	-0.000293	0.000948	-0.00169	-7.27e-05	0.00339		113.9	0.00266	-0.00522	0.00109	0.00228	0.00387	0.00279	0.00581	0.000628
114	-0.00154	0.00423	0.00186	0.000299	0.00154	-0.00287	-0.00659	0.00279		114	-0.00623	-0.00226	0.000499	0.00169	0.00802	0.0016	0.00403	0.0024
114.1	-0.00924	-0.000506	0.00364	-0.00325	0.00272	-0.000501	0.00467	-0.00076		114.1	-0.00741	0.00248	0.000499	-0.000678	0.00032	0.00042	-0.0096	-0.0053
114.2	-0.00391	0.00423	-0.00702	-0.00444	-0.0032	0.00483	0.0017	0.00398		114.2	0.00207	-0.00107	-9.35e-05	0.00288	-0.00205	0.0016	-0.00189	-0.000557
114.3	-0.0045	0.00127	-0.00347	-0.00148	-0.00557	0.00246	-0.00244	0.00457		114.3	-0.00208	-0.00107	0.00168	0.00288	0.00447	-0.00313	-0.00189	0.00477
114.4	-0.00331	-0.00288	0.00127	-0.00148	-0.00261	0.00305	-0.000665	0.00279		114.4	0.000288	-0.00107	0.00287	0.00228	0.00269	0.00101	-0.00545	0.00181
114.5	-0.00983	-0.00761	0.00246	-0.00681	0.00154	0.000684	-0.00303	-0.00076		114.5	-0.000304	0.01078	-0.00483	-0.00305	0.00151	0.0016	0.00284	-0.000557
114.6	-0.000352	-0.00465	-0.00465	0.000299	-0.00735	0.00305	-7.27e-05	0.00457		114.6	-0.00445	-0.00463	-0.00424	-8.57e-05	-0.00383	-0.00313	0.00758	-0.00174
114.7	0.00143	-0.00406	0.00186	0.00267	0.00509	-0.00287	-7.27e-05	-0.00254		114.7	-0.00267	-0.00936	0.00228	0.00465	0.00506	0.00279	-0.00367	-0.0047
114.8	-0.00628	-0.00761	-0.00228	-0.00325	-0.00379	0.00365	-7.27e-05	0.00279		114.8	-0.000897	-0.00403	0.00701	-0.00482	-0.00323	0.00871	-0.00071	-0.00233
114.9	-0.00568	-0.000506	8.7e-05	0.00504	-0.00735	0.00602	-0.00422	-0.000168		114.9	-0.00327	0.00367	-0.00661	-8.57e-05	0.000913	-0.00195	-0.00723	-0.00707
115	-0.00628	0.00601	-0.00643	-0.00207	-0.000237	0.00365	-7.27e-05	-0.00135		115	0.00917	0.00544	-0.00602	0.00228	0.00743	0.00101	0.000475	0.00359
115.1	-0.00509	-0.00228	-0.000505	-0.00503	-0.00498	0.00305	0.0023	-0.00076		115.1	-0.00327	-0.00936	-0.00602	0.00228	-0.00501	0.0022	-0.0013	0.000628
115.2	-0.00272	-0.0088	0.00186	-0.000293	-0.00853	-0.00405	-0.000665	0.00339		115.2	0.00088	0.009	-0.00128	-0.00364	-0.00501	0.00634	-0.00071	0.0024
115.3	-0.00154	-0.00406	0.000679	0.00148	-0.00675	-0.00109	0.00407	-0.00076		115.3	-0.00386	0.00544	0.00168	0.00525	-0.00264	-0.000765	0.00284	-0.00174
115.4	-0.00746	-0.00465	-0.0088	-0.00503	-0.00142	0.00246	-0.00126	0.00516		115.4	-0.00564	-0.00344	-0.000686	0.00643	0.00565	0.00338	0.00166	-0.00174
115.5	-0.00628	-0.00288	-0.00169	0.000299	0.000948	-0.00465	0.00052	-0.00372		115.5	0.00621	-0.00759	0.00109	0.00228	0.00921	-0.00195	0.00225	0.000628
115.6	-0.00983	-0.000506	-0.00406	0.00385	-0.00201	0.00365	0.00111	-0.0055		115.6	-0.00801	0.01018	-0.00661	-0.00364	0.0021	-0.00373	0.00284	-0.00826
115.7	-0.01101	-0.00821	-0.00465	0.00445	-0.00498	0.00898	0.00052	-0.00431		115.7	-0.00623	0.00308	0.01057	-0.00186	-0.00916	-0.00432	-0.00604	-0.00589
115.8	-0.00924	-0.00821	0.000679	0.00445	-0.00438	-0.00405	0.00348	-0.00431		115.8	0.00266	-0.007	-0.00128	-0.00364	-0.00205	0.00634	0.00521	3.53e-05
115.9	-0.00746	0.00364	-0.00169	-0.00148	-0.00261	0.00542	-7.27e-05	-0.0055		115.9	0.00266	-0.00107	-0.0072	-0.00246	0.00506	0.00812	-0.00426	0.000628
116	-0.0045	0.00305	8.7e-05	-0.00207	0.000355	0.00246	0.00111	0.0022		116	-0.00267	0.00248	0.00228	0.00762	0.00506	-0.00313	0.01114	0.0024
116.1	-0.00509	-0.00761	0.00186	-0.00325	-0.00675	-0.00287	-0.006	-0.00194		116.1	-0.000897	-0.00759	-0.00128	0.00584	0.000913	0.0022	0.0064	-0.00352
116.2	-0.00628	-0.00524	0.000679	-0.000885	0.00154	0.00305	0.00289	-0.00431		116.2	-0.000304	0.000113	0.000499	0.00465	-0.0056	0.0022	-0.00545	0.00477
116.3	-0.00924	-0.00169	0.00127	-0.00325	-0.00498	0.00602	0.0023	0.00102		116.3	0.00147	-0.00166	-0.000686	-0.00127	0.00151	0.00753	-0.00426	0.0024
116.4	-0.00746	0.00246	8.7e-05	0.00267	-0.00083	0.00246	0.00526	0.00279		116.4	-0.00504	-0.00344	-0.00483	-0.00186	-0.00797	-0.000765	0.00699	-0.0047
116.5	-0.0045	0.000679	-0.0011	0.00267	-0.00675	0.00246	-0.00363	0.00516		116.5	-0.00327	-0.00344	0.00405	-0.00482	-0.00323	0.00042	-0.00663	-0.0047
116.6	-0.00391	-0.00169	8.7e-05	-0.00562	-0.0032	-0.00228	0.00348	-0.00728		116.6	0.01036	-0.00344	0.00287	-0.000678	-0.000864	0.0022	0.00936	0.003
116.7	-0.00272	-0.00702	-0.00169	-0.00325	-0.00438	0.00424	-0.00481	-0.00609		116.7	0.00799	-0.00107	-0.00542	0.00406	0.00743	0.01108	-0.00189	0.0024
116.8	-0.00391	-0.0011	-0.00524	0.00148	-0.00794	0.000684	0.00704	-0.00313		116.8	-0.00504	0.00663	-0.00306	0.00939	0.01335	-0.00136	-0.00367	-0.000557
116.9	0.000833	0.00601	0.00127	-0.000885	-0.0032	0.00661	-0.000665	-0.0055		116.9	0.00207	-0.00818	-9.35e-05	0.00228	-0.00797	0.00516	-0.000117	0.000628
117	-0.00628	8.64e-05	-0.00406	-0.000293	-0.00201	0.000684	-0.000665	0.00161		117	0.00503	-0.00463	0.00642	0.00762	-0.00205	0.00634	0.00699	-0.00293
117.1	-0.00924	-0.00584	8.7e-05	-0.00325	0.00154	9.17e-05	0.00289	0.0022		117.1	-0.00623	-0.00403	-0.00661	0.00465	0.00269	-0.00491	-0.00486	-0.00293
117.2	-0.000352	0.000679	0.00186	-0.00148	-0.00379	9.17e-05	-0.00244	0.00279		117.2	-0.00801	-0.00344	-0.00483	0.00347	0.00802	-0.00313	-0.00367	-0.00174
117.3	-0.00628	8.64e-05	-0.00524	-0.00562	-0.00675	0.00542	0.00585	-0.00194		117.3	0.0068	0.000113	0.000499	0.00228	-0.000864	0.00812	-0.00604	0.0024
117.4	-0.000944	-0.00584	-0.000505	0.00326	-0.00083	9.17e-05	-0.00126	0.00102		117.4	0.000288	0.00485	0.00998	-0.00423	0.00387	0.00338	0.00818	0.00359
117.5	-0.00272	-0.00169	-0.00524	-0.00207	-0.00142	-0.00287	-0.00185	0.00279		117.5	-0.00386	-0.00344	0.00524	-0.000678	0.00506	-0.0055	-0.00426	-0.0053
117.6	0.00143	-0.00169	0.00423	-0.00266	-0.0032	0.00365	0.00348	-0.00194		117.6	0.00562	-0.00226	-0.01253	0.00228	0.00151	-0.00254	-0.00249	0.00359
117.7	-0.00628	-0.00465	0.00364	0.000299	-0.00083	0.00305	-0.00185	-0.00491		117.7	-0.00741	0.00248	-0.00246	0.00347	-0.000272	0.0022	-0.00367	0.00596
117.8	-0.00864	-0.00524	0.000679	-0.000885	-0.00675	0.00305	0.00407	-0.00254		117.8	0.00503	-0.00344	0.0082	0.00998	-0.00738	0.00753	0.00166	0.00537
117.9	-0.00805	-0.00288	-0.000505	0.00208	-0.000237	-0.00109	-7.27e-05	-0.0055		117.9	0.00088	-0.00877	-9.35e-05	-8.57e-05	0.00565	0.00457	0.00166	0.000628
118	-0.000944	0.00186	0.00127	0.008	-0.00201	0.00305	0.0023	-0.00609		118	-0.00386	0.0013	-0.01194	-0.00305	0.00387	0.00753	0.00462	-0.00293
118.1	-0.00805	0.00246	0.00246	0.000892	-0.00201	0.000684	0.00111	-0.01083		118.1	0.00384	0.01018	-0.000686	0.00939	0.00328	-0.00432	0.00225	-0.00115
118.2	0.000833	-0.00702	-0.00406	-0.00859	-0.00379	0.00483	0.00348	-0.00491		118.2	-0.00919	0.000113	0.00998	-0.00186	-0.00323	0.00042	-0.0013	-0.00174
118.3	-0.00331	-0.00524	-0.00406	-0.00385	-0.00261	-0.000501	-0.00244	-0.00372		118.3	0.0074	-0.00403	-0.00661	0.00347	-0.000864	0.00516	-0.00426	0.0024
118.4	-0.00568	-0.00347	0.00364	-0.000293	-0.00083	0.00661	0.00526	-0.00254		118.4	0.01036	0.0013	0.00938	0.00228	-0.00205	-0.00373	-0.000117	0.00537
118.5	-0.01042	-0.00169	-0.000505	-0.00325	0.00154	0.00424	-0.00244	-0.00787		118.5	0.0074	-0.00463	-0.00424	0.00288	-0.00383	0.00101	0.00166	-0.00707
118.6	-0.00568	-0.00465	0.00246	0.00445	0.000355	-0.00524	-0.000665	0.00161		118.6	-0.00564	-0.00403	-0.000686	0.000507	0.00506	-0.00136	-0.00426	0.00951
118.7	-0.00687	-0.00584	-0.000505	0.000892	0.00154	-0.00169	0.00526	-0.00491		118.7	0.00266	0.000706	-0.000686	0.00702	0.000913	-0.000765	-0.00367	0.00122
118.8	-0.00154	-0.00169	-0.000505	0.00622	-0.00557	0.00483	-7.27e-05	-0.00609		118.8	0.00325	0.00189	-0.00306	-0.000678	0.00387	0.0099	0.00403	-0.00233
118.9	-0.0045	-0.000506	-0.000505	0.00208	-0.00675	-0.000501	0.00407	-0.0055		118.9	0.0074	0.00367	-0.00424	0.00288	0.00269	-0.00432	-0.00189	-0.00233
119	-0.00272	-0.00524	0.00423	-0.000293	-0.00083	-0.00169	0.0023	-0.00905		119	0.00443	0.000706	0.00998	0.00465	0.00624	-0.00136	-0.01078	0.003
119.1	-0.00391	0.00423	0.00364	-0.00148	-0.00498	0.00128	0.00407	-0.00254		119.1	0.00562	-0.00463	-0.00424	0.000507	0.00032	0.0022	0.0064	-0.000557
119.2	-0.000352	-0.00347	-0.00287	0.00385	-0.000237	0.00305	0.0017	-0.00372		119.2	-0.00504	-0.00166	0.00287	-0.00246	-0.00264	0.00694	0.00225	-0.00944
119.3	-0.00154	-0.00288	8.7e-05	0.00208	-0.00379	-0.000501	0.00467	-0.0055		119.3	-0.000897	-0.00463	0.00405	-0.00246	0.00447	0.00042	-0.0096	0.00418
119.4	-0.00628	-0.00169	0.00127	0.00622	0.000948	0.00483	-0.0054	0.00339		119.4	-0.000897	0.00426	-0.00483	0.00288	-0.00146	0.00101	0.00462	0.00122
119.5	-0.00391	0.00186	-0.0011	-0.00207	-0.00438	-0.00346	0.00111	-0.00965		119.5	-0.00386	-0.00285	-0.00602	0.00465	-0.000272	0.00397	0.00344	0.00477
119.6	-0.00331	-0.00702	-0.00287	0.00682	-0.000237	-0.00287	0.00111	-0.000168		119.6	-0.00741	-0.00166	-9.35e-05	-0.00601	-0.00442	0.00279	-0.00308	0.00774
119.7	-0.00154	-0.00169	0.00305	0.000299	0.00272	0.00542	-0.00303	-0.00491		119.7	0.00325	0.00604	0.00109	0.00406	0.00684	0.0022	0.00166	0.00596
119.8	-0.01398	-0.000506	-0.00465	0.00563	-0.00379	-0.00465	-7.27e-05	-0.00372		119.8	0.00443	0.00781	0.000499	-0.00246	0.0021	0.00634	-0.009	0.0024
119.9	-0.00628	0.00127	0.00186	-0.000885	-0.00735	0.00483	0.00348	-0.00787		119.9	0.00325	-0.00463	0.00524	0.00525	-0.00264	-0.000765	-0.00723	-0.00174
120	-0.00391	8.64e-05	0.00127	-0.00266	-0.00557	-0.00109	0.00526	-0.00135		120	-0.00267	-0.00522	0.00465	-0.00246	0.00387	0.00042	0.00758	0.003
120.1	-0.0045	-0.00347	0.00305	0.00148	-0.00142	-0.00109	0.0023	-0.00194		120.1	0.00266	0.00248	-0.00898	0.00643	-0.0056	0.00753	-0.00189	0.003
120.2	-0.0045	-0.00584	-0.00228	-0.00503	-0.00201	0.00483	-7.27e-05	-0.00668		120.2	0.00266	0.00248	0.000499	0.00228	-0.00383	-0.0061	-0.00189	-0.000557
120.3	-0.00805	0.00305	0.00364	-0.000293	0.00272	9.17e-05	0.00407	0.00161		120.3	0.00799	-0.00107	0.00109	-0.000678	0.00684	-0.00136	-0.00189	0.000628
120.4	-0.00331	8.64e-05	0.00542	0.00267	0.000948	-0.00346	0.01	0.00339		120.4	0.00384	-0.00226	-0.00128	-0.000678	0.00032	-0.000765	-0.00841	-0.00293
120.5	-0.00746	-0.00347	-0.000505	0.008	-0.00142	-0.00405	0.0017	0.00161		120.5	0.000288	0.00959	-0.00246	0.0088	0.00506	-0.00373	-0.00486	-0.00648
120.6	-0.00568	-0.00524	0.00601	0.00504	-0.00438	0.00187	0.00052	-0.00313		120.6	0.01036	-0.00344	-0.00779	-0.00246	0.00151	0.00634	0.00107	-0.00352
120.7	-0.00983	-0.000506	0.00423	0.00385	-0.000237	-0.0082	0.00348	0.00339		120.7	-0.00741	0.00189	-0.00483	-0.00246	-0.00857	-0.000173	-0.00723	0.00477
120.8	-0.01101	0.00483	0.0072	-0.00148	-0.000237	-0.00228	0.00822	-0.00372		120.8	0.00384	0.00189	0.00524	0.0088	-0.00205	-0.00728	0.00462	0.00537
120.9	-0.00687	-0.00347	0.00127	-0.000885	-0.00675	-0.00109	-0.00126	-0.00609		120.9	0.00858	-0.00344	-0.00128	0.00406	0.00387	0.00457	0.00166	-0.00233
121	-0.0122	-0.00584	-0.00406	0.00504	0.00272	9.17e-05	0.00348	-0.00431		121	-0.000304	-0.00344	-0.00483	-0.00779	0.00506	-0.00254	-0.00071	0.00122
121.1	-0.00687	0.00186	0.00423	-0.000293	-0.00201	0.000684	-0.00244	0.000425		121.1	0.00325	-0.00285	-0.00483	0.00525	-0.00323	-0.000765	-0.00486	0.003
121.2	-0.00628	-0.00169	0.00897	0.00504	-0.000237	9.17e-05	0.0017	-0.00076		121.2	-0.00327	-0.00463	0.00583	-8.57e-05	-0.0056	0.00812	0.00284	-0.00352
121.3	0.000833	-0.000506	-0.00406	0.00148	0.000948	-0.00405	-7.27e-05	-0.00491		121.3	0.00858	0.01315	0.00405	0.00465	-0.00383	-0.000765	0.00521	3.53e-05
121.4	-0.00331	0.00246	-0.000505	0.00326	-0.00498	-0.00109	0.00526	0.0022		121.4	0.00562	0.000706	-0.00898	-0.00364	0.0021	-0.000765	0.00699	-0.000557
121.5	-0.00391	-0.000506	-0.00406	0.00385	-0.00261	0.000684	0.00407	0.00102		121.5	-0.00623	-0.00463	0.000499	0.00762	0.000913	0.00042	-0.00486	-0.00115
121.6	-0.00983	-0.0011	0.00305	-0.00325	-0.00794	-0.00583	0.00526	-0.00254		121.6	0.00562	0.00544	0.00998	0.0011	-0.0062	-0.00432	0.00225	-0.00826
121.7	-0.00746	0.00246	0.00246	0.00918	0.000355	-0.00405	0.00348	0.00102		121.7	-0.000897	0.00485	-0.00957	0.00347	0.0021	0.0016	-0.00604	0.00477
121.8	-0.000352	0.000679	-0.00169	0.00267	0.000948	-0.00228	-0.00244	0.00161		121.8	-0.00208	-0.0064	-0.00187	-0.00364	0.00743	0.00338	0.000475	0.000628
121.9	-0.01042	-0.0011	0.0072	0.00267	-0.000237	-0.00346	0.00111	-0.00609		121.9	0.00384	0.00722	0.00465	0.0011	0.00565	0.0022	0.00403	-0.00293
122	-0.00687	-0.00347	-0.00228	0.00208	-0.000237	0.000684	0.00585	-0.00313		122	-0.00801	0.00426	0.00228	0.00584	-0.00205	-0.00432	0.00166	0.000628
122.1	-0.0045	0.00305	-0.00465	0.00208	-0.00261	0.000684	0.00407	0.00398		122.1	0.00088	0.00189	-0.00306	0.00465	0.00269	-0.00313	-0.00782	0.00122
122.2	-0.00746	-0.000506	0.00897	0.00741	-0.000237	9.17e-05	0.00111	-0.000168		122.2	0.00266	0.00308	-0.00839	-0.00186	-0.00323	0.00042	-0.00426	-0.00352
122.3	-0.00687	8.64e-05	0.00779	-0.00562	0.000948	-0.00405	0.00585	-0.000168		122.3	-0.00741	-0.00403	0.00405	0.00288	-0.0056	0.00338	0.00225	-0.000557
122.4	-0.01042	8.64e-05	-0.0011	0.000892	0.00213	-0.00287	0.0023	-0.00254		122.4	-0.00327	0.00248	0.00287	-0.00186	0.00565	-0.000173	-0.00308	3.53e-05
122.5	-0.00687	8.64e-05	-0.00998	-0.0074	-0.00083	-0.00405	0.00467	0.00161		122.5	-0.00149	-0.00522	0.00287	0.0088	-0.00146	-0.00136	-0.000117	-0.00174
122.6	-0.00628	-0.000506	0.0066	-0.000293	-0.00794	-0.00287	0.00348	0.00102		122.6	-0.00741	0.00841	-0.00483	-0.00601	0.00387	-0.00313	-0.0013	3.53e-05
122.7	-0.00568	0.00364	0.00779	0.00385	-0.00261	-0.00346	0.00467	0.00279		122.7	-0.00208	0.00308	-0.00306	0.00643	-0.00146	0.00042	-0.00782	-0.00767
122.8	-0.00628	0.000679	-0.00169	0.00741	0.00213	0.00128	-0.00244	-0.0055		122.8	0.00088	-0.00166	0.00583	0.000507	0.00506	0.00279	-0.00426	-0.00944
122.9	-0.00154	8.64e-05	-0.000505	-0.00148	0.000355	-0.00346	-7.27e-05	-0.00313		122.9	-0.00386	0.01078	0.00465	0.00643	0.00269	-0.00195	0.00166	0.00596
123	0.00143	0.00483	0.000679	-0.00325	-0.00379	-0.00642	0.00585	-0.00254		123	-0.01037	-0.00285	-0.00365	0.00939	0.00328	0.00397	-0.00249	-0.00233
123.1	-0.00628	0.00186	0.00364	0.00504	-0.00142	-0.00287	-0.00126	0.00576		123.1	-0.00267	0.00248	0.00405	0.0011	-0.00738	0.0016	0.00758	-0.0047
123.2	-0.0045	0.00127	8.7e-05	0.00208	0.00154	-0.00169	-0.00303	-0.00194		123.2	0.00621	0.00367	-0.000686	0.00406	0.000913	-0.00787	-0.00071	3.53e-05
123.3	-0.00568	0.00305	0.000679	0.00385	-0.00616	-0.00702	0.00822	-0.00194		123.3	-0.01097	-0.00285	-0.00424	0.00762	-0.0056	0.00042	-0.00545	3.53e-05
123.4	-0.00154	-0.00288	0.00779	-0.00562	0.00213	-0.00465	0.00407	0.000425		123.4	-0.00741	0.00189	-0.00246	-0.000678	-0.00205	-0.000765	0.0064	-0.00293
123.5	-0.00509	0.00601	0.0072	0.00208	0.00272	-0.00109	0.0023	-0.00491		123.5	-0.00386	0.00781	0.000499	0.00406	0.00921	0.00101	-0.00486	-0.00352
123.6	-0.00746	0.000679	0.00542	0.00563	0.000355	0.00365	0.00111	-0.000168		123.6	-0.00564	-0.00581	0.00168	-0.00482	-0.00264	-0.0055	-0.00604	-0.00352
123.7	-0.00805	0.00127	-0.00228	0.000892	-0.00201	-0.00287	0.00526	0.000425		123.7	-0.01037	0.00426	0.00287	0.0011	0.000913	-0.000765	0.00225	0.00359
123.8	-0.00568	0.00305	-0.00347	0.000892	-0.00675	-0.00228	0.0023	-0.000168		123.8	-0.00801	-0.00166	-0.01016	0.00288	0.00387	-0.00254	-0.00249	0.003
123.9	-0.00746	0.00186	0.00483	-0.000293	-0.00557	-0.00169	0.00052	0.000425		123.9	0.000288	-0.00522	-0.0072	-8.57e-05	-0.00501	0.00042	-0.00486	0.003
124	-0.00568	0.000679	0.000679	0.00504	-0.000237	0.00246	0.0017	-0.00372		124	-0.01156	-0.000479	-0.000686	0.0011	0.00387	-0.00254	-0.01196	-0.00648
124.1	-0.00687	-0.00288	0.00127	-0.00207	0.00332	0.00246	0.00467	0.00457		124.1	-0.00801	-0.00107	0.00287	-0.00127	-0.0056	-0.000173	0.00284	-0.00115
124.2	-0.00924	-0.00524	0.00246	-0.000293	0.00272	-0.0082	-0.000665	0.00279		124.2	0.00266	0.00367	0.00583	0.00525	-0.00916	0.0016	0.00403	-0.000557
124.3	-0.00272	8.64e-05	-0.00169	-0.00148	0.000948	0.00128	-0.00422	-0.00431		124.3	0.00325	0.00663	-0.00424	-0.000678	0.000913	-0.00491	-0.00545	-0.0053
124.4	0.000241	0.00779	0.00779	0.00148	-0.00201	0.00483	0.00052	0.00398		124.4	-0.00801	-0.000479	-0.00542	0.00347	0.00151	0.00101	-0.00071	0.0024
124.5	-0.000944	-0.00169	-0.00287	-0.00207	-0.00261	-0.00228	-0.00126	-0.00135		124.5	-0.00445	0.01433	0.00109	0.00169	0.00032	-0.00432	-0.00426	-0.00352
124.6	-0.00391	0.00127	0.00601	-0.00207	-0.00261	-0.00642	0.00407	-0.00372		124.6	-0.00623	-0.007	-0.00246	0.00406	-0.00383	0.00101	-0.00071	-0.00233
124.7	-0.00568	0.00246	-0.000505	-0.000885	0.00569	-0.00109	0.00348	0.00279		124.7	-0.00327	-0.00877	-0.00424	-0.000678	0.00032	0.00042	-0.00663	0.00774
124.8	-0.00687	0.00246	-0.000505	0.00741	0.000948	-0.00109	0.00111	-0.00254		124.8	0.000288	-0.00166	0.00346	-0.00423	-0.000272	0.00338	0.00877	0.00477
124.9	-0.00331	0.00305	0.00601	-0.00444	-0.00557	-0.00346	0.00348	0.00516		124.9	-0.01452	0.00604	-9.35e-05	0.00465	0.000913	-0.00373	0.00758	0.0024
125	-0.00331	0.00305	0.000679	0.00445	0.00391	0.00128	0.00348	0.00457		125	-0.00208	0.00308	0.00583	-0.00127	0.00565	-0.0055	-0.00426	-0.000557
125.1	0.000833	-0.00524	0.00542	-0.000293	0.00509	-0.00465	-0.000665	0.00102		125.1	-0.000304	0.00959	-0.000686	0.00465	-0.00383	-0.00491	-0.00308	-0.00648
125.2	-0.00272	0.00246	0.000679	-0.00266	0.00154	-0.00228	0.00763	0.0022		125.2	-0.00149	-0.00107	-0.00365	-0.00482	-0.00205	0.00338	-0.00426	-0.00707
125.3	-0.00568	0.00186	0.000679	0.00445	0.0045	-0.00346	0.00348	0.00279		125.3	-0.00741	0.00189	0.00465	0.0011	0.00387	-0.00136	-0.00545	-0.00589
125.4	0.00202	-0.0011	0.00364	-0.00148	0.000948	-0.00228	0.00052	-0.00313		125.4	-0.00919	-0.00285	-9.35e-05	-8.57e-05	-0.000272	0.00279	0.00462	0.00181
125.5	-0.00509	0.00127	8.7e-05	-0.000293	-0.00794	-0.00405	0.00704	-0.00313		125.5	-0.00327	-0.00877	-0.00246	0.00406	-0.00679	0.00101	-0.00308	0.00122
125.6	-0.000944	-0.00169	0.00246	0.000299	-0.00853	-0.00524	0.00111	-0.00313		125.6	0.00384	0.00308	-0.00483	-0.00305	0.00151	-0.000765	-0.00604	-0.00115
125.7	0.000833	0.00186	0.00305	-0.00207	0.00569	-0.00405	0.00585	0.000425		125.7	-0.000897	0.00722	0.00109	0.00525	0.0021	0.0016	-0.009	-0.00233
125.8	0.00143	0.00305	-0.00465	0.00148	-0.00261	-0.00405	-0.00837	0.000425		125.8	-0.000897	0.000113	0.00109	-0.00246	-0.00679	-0.0061	0.00225	-0.00293
125.9	-0.000352	0.00246	0.00127	0.00563	-0.00675	-0.00169	-0.00363	0.0022		125.9	-0.00623	0.00663	-0.00483	0.00228	0.00802	-0.0061	-0.0013	0.00122
126	-0.00509	0.00186	0.000679	-0.00148	-0.00379	-0.00228	0.00704	0.000425		126	-0.00919	-0.00107	-0.00483	0.00288	-0.0062	-0.00254	-0.00071	0.00122
126.1	-0.00864	0.000679	0.000679	0.000892	0.00272	-0.00169	0.00111	-0.00254		126.1	-0.00682	-0.00107	0.00287	-0.01075	-0.000864	0.00338	-0.00545	0.00477
126.2	-0.000944	0.00246	0.00186	-0.00444	0.000355	0.000684	0.00348	0.00398		126.2	-0.00386	0.00308	0.00405	-0.00423	-0.000864	-0.00313	-0.00663	-0.00174
126.3	-0.00154	0.00186	0.00483	-0.00266	-0.00083	9.17e-05	-7.27e-05	0.000425		126.3	0.00147	-0.00522	0.00642	0.00228	-0.00146	-0.00136	-0.009	-0.0047
126.4	0.00853	0.00246	0.00246	0.00208	-0.00083	-0.01057	-0.00244	-0.00254		126.4	-0.01274	0.00544	-0.00128	0.000507	0.00269	-0.00195	0.00699	-0.00115
126.5	0.000833	-0.00406	-0.000505	-0.00207	0.000355	-0.00228	-0.000665	0.00457		126.5	-0.00682	0.00663	0.00109	0.00288	-0.00738	-0.00313	-0.00545	-0.0047
126.6	-0.00213	-0.00169	0.00186	0.00267	0.00272	0.00128	0.00348	0.000425		126.6	0.000288	0.00367	-0.000686	-0.00779	-0.000864	-0.00195	-0.00071	-0.00293
126.7	-0.00272	0.00364	-0.00228	0.00385	0.00509	-0.00405	-0.000665	0.00339		126.7	-0.00623	0.00308	0.00168	0.00169	-0.00501	0.00042	-0.000117	-0.00411
126.8	-0.00331	-0.00288	0.000679	-0.000885	0.000948	9.17e-05	-0.0054	0.00279		126.8	0.00266	-0.00107	-0.00424	0.00288	-0.00323	0.00042	0.000475	0.00537
126.9	-0.00864	-0.00406	0.00542	0.00208	-0.00438	0.000684	0.0017	0.00102		126.9	-0.00327	0.00959	0.00228	-0.0066	0.00387	-0.00254	-0.00071	-0.000557
127	0.000241	0.00186	0.00305	-0.00385	-0.00083	-0.00287	0.00348	-0.00609		127	-0.01748	0.000706	-0.00424	0.0088	-0.000272	0.0016	-0.00189	-0.00233
127.1	-0.00924	0.00127	-0.00702	-0.00444	0.000355	-0.000501	0.00704	0.00279		127.1	-0.00149	-0.000479	0.00287	-0.00246	-0.00323	0.00812	-0.00249	-0.00174
127.2	-0.00272	0.00127	0.00305	0.00622	-0.000237	-0.00346	0.00348	0.0022		127.2	-0.00682	0.00604	0.00879	-0.00601	-0.00738	-0.0055	-0.00604	-0.000557
127.3	-0.00272	0.0066	8.7e-05	0.000892	0.00924	-0.00228	-0.00244	-0.00313		127.3	-0.00504	-0.000479	-0.000686	-0.00186	-0.00383	0.0022	-0.00189	0.00537
127.4	-0.00746	0.00364	8.7e-05	-0.00207	-0.0032	-0.00642	-0.00303	0.00635		127.4	-0.00445	0.000113	-0.00602	0.0011	-0.00797	-0.00136	0.00166	0.0024
127.5	-0.01042	-0.00524	0.000679	-0.00325	0.000355	-0.00405	-0.000665	0.00161		127.5	-0.00267	0.0013	-0.000686	0.00288	0.0021	-0.000765	-0.00367	-0.00174
127.6	-0.00213	0.00542	-0.00287	0.00208	-0.00142	-0.00109	0.00052	0.0022		127.6	-0.00267	0.0013	0.00405	0.00169	0.00269	-0.00195	-0.00249	-0.00115
127.7	-0.0045	-0.00347	0.00305	0.000892	0.000948	-0.00405	0.00111	-0.00135		127.7	-0.00208	-0.01529	0.0082	-0.01312	-0.00264	-0.00373	-0.000117	0.00181
127.8	-0.00331	-0.00169	0.00305	-0.00266	-0.000237	-0.00702	-0.00126	-0.00076		127.8	-0.02104	-0.00107	-0.00187	-0.00246	-0.00738	0.00279	-0.000117	0.00418
127.9	0.000833	0.00364	-0.00998	-0.000885	0.000948	-0.00346	0.01	0.00516		127.9	-0.00978	-0.0064	-0.00187	0.00821	0.00328	0.00279	-0.00367	-0.00589
128	0.00794	0.00364	-0.0011	-0.000293	0.00509	0.00246	0.00348	0.000425		128	-0.0086	0.01018	0.00701	0.00347	-0.00738	-0.00432	0.00166	-0.00233
128.1	-0.0045	-0.000506	0.00186	0.000299	-0.000237	-0.00109	-0.00126	0.00516		128.1	0.000288	0.00367	-0.00187	-0.000678	-0.00146	-0.00373	-0.000117	-0.00174
128.2	-0.00628	-0.00584	-0.0088	-0.000293	-0.000237	0.00246	0.00644	0.00872		128.2	-0.01689	-0.00463	0.00109	-0.000678	-0.000272	0.00397	-0.00367	-0.00411
128.3	-0.00331	-0.00347	0.00779	-0.00325	0.000355	0.000684	0.0023	0.00398		128.3	0.00266	-0.00344	-0.00306	-0.00364	-0.00857	-0.000765	0.00284	-0.000557
128.4	-0.00154	0.00897	0.00483	0.00267	-0.00083	-0.00642	-0.00185	0.00457		128.4	0.00621	0.00426	0.00109	-0.00127	-0.00264	0.00101	0.00166	3.53e-05
128.5	-0.00391	0.000679	-0.00228	-0.00207	-0.000237	-0.00169	0.0023	-0.00254		128.5	-0.00267	0.0013	0.00405	-0.00186	0.0021	0.00338	0.00699	0.003
128.6	-0.01042	-0.000506	-0.0011	-0.00207	0.00272	0.00305	-0.00303	-0.000168		128.6	-0.00741	-0.00759	0.00287	0.00347	-0.000864	0.00753	0.00166	-0.00411
128.7	0.00202	0.00305	8.7e-05	-0.00148	0.000355	-0.00405	0.0023	-0.00076		128.7	-0.00327	0.00248	-9.35e-05	0.000507	0.00684	-0.00491	-0.00189	-0.00115
128.8	0.000833	0.00305	-0.00702	0.000892	-0.0032	-0.00109	0.00052	0.00576		128.8	0.00088	-0.00107	-0.000686	0.00169	-0.000272	0.0016	-0.00723	-0.00293
128.9	-0.00272	-0.00761	0.00364	-0.00799	-0.00498	0.00424	-0.00777	-0.000168		128.9	-0.00801	0.000706	0.00287	0.00169	-0.000272	0.00338	0.00284	-0.0053
129	0.000241	-0.000506	0.00246	0.00208	0.000948	-0.00346	0.0017	0.00398		129	0.00266	-0.00344	-0.00246	0.00228	0.00387	-0.00313	-0.00249	0.000628
129.1	0.00202	0.00423	-0.0011	-0.000885	-0.000237	-0.00169	0.0023	-0.00135		129.1	-0.00386	0.00841	-0.00128	0.0011	-0.00323	-0.000765	-0.00782	-0.00411
129.2	0.0032	0.00246	0.0072	-0.0074	-0.00498	0.00128	0.00407	0.00339		129.2	0.00147	-0.00226	-0.00128	0.00643	-0.00383	0.00397	0.00462	0.00181
129.3	0.000241	-0.0011	-0.00524	0.00326	-0.00083	0.00128	-7.27e-05	-0.00254		129.3	-0.00504	0.00722	0.00109	-0.000678	-0.00205	-0.00373	-0.00604	0.003
129.4	-0.00628	-0.00347	-0.00761	-0.000885	-0.00083	-0.00169	-0.00422	0.000425		129.4	-0.00208	-0.000479	-0.00187	-0.00127	-0.00442	0.0016	0.000475	-0.00115
129.5	-0.00154	0.00246	0.00186	-0.00207	0.00924	-0.00405	0.00348	0.00753		129.5	-0.00149	-0.000479	-0.00424	-0.00186	0.00151	-0.00432	0.000475	-0.01004
129.6	-0.00331	-0.0011	0.000679	-0.00325	-0.00142	-0.00287	-0.00126	-0.00846		129.6	-0.000897	-0.00877	-0.00187	0.00169	-0.00323	0.00753	0.00403	0.000628
129.7	-0.000352	-0.00465	-0.00287	0.00208	-0.00083	-0.00109	-0.00481	0.00161		129.7	-0.000304	0.00663	-0.000686	0.00347	0.00387	-0.00136	0.00344	-0.00174
129.8	0.00143	-0.00169	0.00186	0.000892	0.00272	9.17e-05	0.0017	0.0022		129.8	-0.00741	-0.00166	0.00405	-0.00364	0.00328	-0.00432	-0.00545	-0.00174
129.9	-0.000944	0.00423	-0.00643	-0.00148	0.00213	9.17e-05	0.0023	0.00279		129.9	-0.00504	-0.00344	-0.00246	0.0011	-0.00323	0.00516	-0.0013	-0.00293
130	0.00143	0.00246	8.7e-05	-0.000885	-0.00201	9.17e-05	-0.00363	0.0022		130	0.00147	-0.00285	-0.00365	0.00288	-0.00146	-0.00195	0.00521	0.00359
130.1	-0.00331	-0.00761	-0.000505	0.00267	-0.00201	-0.00287	-0.00363	-0.000168		130.1	-0.000304	-0.00166	-0.00424	0.00169	-0.00679	0.0016	0.00166	-0.00115
130.2	-0.00154	-0.0011	-0.000505	0.00326	0.00332	0.000684	-0.00126	0.00339		130.2	0.00325	-0.00818	0.00109	0.00169	-0.00442	-0.00313	-0.00367	0.000628
130.3	0.00143	-0.0011	-0.00465	-0.00503	-0.000237	-0.00465	0.0023	-0.00194		130.3	-0.000304	0.00485	-0.00306	0.00584	0.00447	0.00575	-0.00663	-0.00115
130.4	-0.00568	0.00364	-0.00287	-0.00562	0.000355	0.00128	-0.00185	0.00457		130.4	-0.000897	-0.000479	0.00465	-0.00542	-0.00916	0.00101	0.00166	0.00122
130.5	-0.00391	-0.0011	-0.00287	-0.00385	-0.000237	-0.0082	-0.00481	-0.00372		130.5	-0.00623	-0.007	-0.00187	-0.00423	-0.00205	-0.000765	-0.00189	-0.00352
130.6	-0.000944	-0.000506	-0.00228	-0.00385	-0.00261	0.00246	-0.000665	0.00398		130.6	0.00325	-0.000479	0.00524	-0.00246	0.00447	0.0022	-0.00189	0.00122
130.7	0.00202	-0.00406	-0.000505	0.00208	0.00746	-0.00228	-0.00244	-0.00254		130.7	-0.00564	-0.00581	-0.00128	0.000507	0.00269	0.00042	0.00344	0.00833
130.8	-0.00331	0.00246	-0.00228	-0.0074	0.000948	-0.00642	-0.00303	0.00516		130.8	-0.00564	0.000113	-0.00246	0.00406	-0.00323	0.00397	0.00521	-0.00826
130.9	0.00616	-0.00169	-0.00228	-0.000293	-0.00083	-0.00228	0.0017	0.000425		130.9	0.00147	-0.00818	-0.00128	0.00347	-0.00442	0.0016	-0.000117	-0.00233
131	0.00261	-0.00228	-0.00228	0.00208	-0.00201	9.17e-05	-7.27e-05	0.00102		131	-0.0086	-0.00522	0.000499	-0.000678	-0.000272	-0.00195	0.00166	0.00181
131.1	0.00498	0.00423	-0.0011	-0.00266	-0.00498	0.000684	0.0023	0.00102		131.1	-0.00741	0.00426	0.00346	0.00228	-0.00264	-0.000765	0.00521	-0.00707
131.2	-0.0045	-0.0011	-0.00287	-0.000293	-0.00142	0.00365	-0.006	0.00161		131.2	0.000288	-0.00403	0.00405	-0.000678	0.00328	-0.00313	-0.00308	0.00359
131.3	0.00261	-0.0011	0.000679	0.000299	-0.0032	0.00305	0.00467	0.0022		131.3	-0.000304	0.000706	-0.00365	0.00288	-0.00501	0.0016	-0.00367	0.00477
131.4	0.000241	-0.000506	8.7e-05	-0.000293	-0.000237	-0.00109	0.00289	0.0022		131.4	-0.00386	-0.00285	-0.000686	0.00288	-0.00264	-0.00195	-0.00249	0.00477
131.5	-0.00509	0.00305	-0.000505	0.00385	0.00213	-0.00346	-7.27e-05	0.0022		131.5	-0.00386	0.00544	0.00465	0.00347	0.00684	-0.00195	0.00225	-0.00411
131.6	0.00616	-0.00465	0.00127	-0.00325	-0.00261	0.00957	-0.000665	0.00753		131.6	-0.00504	-0.00344	-0.00187	-0.00246	0.00447	0.00338	-0.00189	-0.00115
131.7	0.00261	-0.00406	0.0072	-0.00562	0.00391	-0.00405	0.00348	-0.01024		131.7	-0.00327	-0.00463	-0.00365	-0.01075	-0.00442	0.00397	-0.00367	-0.0053
131.8	0.00616	0.00483	0.000679	0.000299	-0.00498	9.17e-05	0.00348	-0.00076		131.8	-0.00564	-0.00522	-0.00187	0.00643	-0.0056	0.0022	0.00284	0.00655
131.9	-0.00154	0.00246	0.00246	-0.00325	-0.00261	9.17e-05	-0.00718	-0.00135		131.9	-0.00149	-0.00463	-0.00187	-0.00305	-0.00501	-0.00373	0.0064	0.00596
132	0.0032	-0.00347	-0.00347	-0.00385	-0.00616	-0.00228	-0.00126	0.00161		132	-0.00208	0.00367	-0.00128	0.00406	-0.00205	0.00634	-0.00189	0.00122
132.1	0.000241	-0.00169	0.00246	-0.00325	0.00272	-0.00109	0.0017	-0.000168		132.1	-0.00445	0.00426	0.00109	0.00288	-0.00146	0.00101	0.00166	-0.01063
132.2	0.0032	-0.0011	-0.00761	-0.000293	-0.000237	-0.00109	0.00526	0.00161		132.2	-0.00623	0.00308	0.00109	0.00228	-0.000272	-0.000173	-0.000117	-0.00174
132.3	-0.0045	-0.00347	-0.00228	-0.00266	-0.0032	0.00305	-0.000665	0.0022		132.3	-0.00801	-0.00226	-0.00306	-8.57e-05	-0.000272	-0.00195	-0.00545	-0.00115
132.4	-0.000944	-0.00288	-0.00406	0.000892	-0.00438	0.000684	-0.00303	0.00576		132.4	-0.000304	-0.00344	0.00109	-0.00127	-0.00264	0.00338	-0.000117	-0.00411
132.5	0.00439	0.00542	8.7e-05	-0.00148	-0.00142	-0.00346	-0.000665	0.00516		132.5	-0.01037	-0.00463	-0.00483	0.0011	-0.00738	0.00279	0.00521	-0.00115
132.6	0.000833	8.64e-05	0.00127	-0.00266	0.00154	-0.00405	-0.0054	-0.00313		132.6	-0.00149	0.000706	0.00287	-0.000678	-0.0062	-0.00195	-0.00189	0.00359
132.7	-0.00331	0.00483	-0.00228	0.000299	-0.00261	-0.00346	-0.00303	-0.00431		132.7	-0.00623	0.00426	0.00346	0.01058	0.00387	0.00457	0.00344	-0.00293
132.8	-0.000352	-0.000506	-0.00465	0.000892	-0.0032	0.00128	0.00052	0.00398		132.8	-0.00386	0.000706	-9.35e-05	-0.00127	0.000913	0.00101	-0.00486	-0.00115
132.9	0.00972	0.00305	0.000679	-0.000885	-0.000237	-0.00169	0.00052	-0.00135		132.9	-0.01097	-0.000479	-0.00483	-0.0066	0.00328	-0.00373	-0.00604	-0.00648
133	-0.000352	-0.00584	-0.00524	-0.00207	-0.00379	0.00246	-0.0054	-0.00194		133	-0.00741	-0.00403	0.00879	-0.00305	0.00032	0.00338	0.000475	0.00359
133.1	-0.00687	-0.00288	-0.00287	-0.00562	-0.00498	9.17e-05	-7.27e-05	-0.00254		133.1	-0.000304	-0.00522	-0.00128	0.01058	-0.00916	-0.00432	0.00284	0.00418
133.2	-0.00154	8.64e-05	-0.00169	-0.00148	-0.00379	0.00246	-0.00422	0.0022		133.2	-0.01215	0.00663	-0.00424	0.0011	-0.000864	0.00338	0.00403	0.0024
133.3	0.00261	-0.00288	-0.0011	-0.000293	-0.0032	0.00305	-0.00126	-0.00313		133.3	-0.00267	-0.000479	-0.00306	0.00347	0.00743	0.00279	-0.00486	-0.00293
133.4	-0.000352	-0.00643	-0.00465	-0.000885	-0.0032	9.17e-05	0.00585	0.00931		133.4	0.00088	-0.00166	-0.00424	-0.00246	0.00151	0.00279	-0.00782	-0.00115
133.5	-0.00391	-0.00524	8.7e-05	-0.00622	-0.00616	9.17e-05	-0.00422	-0.00254		133.5	-0.00978	-0.00107	0.00109	0.00169	-0.00383	-0.00313	0.00166	-0.000557
133.6	-0.00154	8.64e-05	0.00246	-0.00207	-0.00379	0.00187	-7.27e-05	-0.00076		133.6	0.00088	-0.00581	0.00465	-0.00186	-0.01093	-0.00136	0.00284	-0.00174
133.7	-0.000944	-0.00761	-0.00584	-0.00266	0.000355	-0.00346	-7.27e-05	-0.00254		133.7	-0.0086	-0.00996	-0.00128	-0.00482	-0.00205	0.00101	0.00225	0.00418
133.8	-0.00331	-0.00465	0.00127	0.00208	-0.00083	0.00187	0.00348	0.00635		133.8	-0.00327	-0.00522	-0.00661	0.0011	0.0021	0.00575	-0.000117	-0.0047
133.9	0.0032	-0.0088	8.7e-05	0.00385	-0.00201	-0.000501	-0.00718	0.000425		133.9	-0.00682	-0.00818	0.00346	0.00169	-0.000272	0.00516	0.00166	0.00418
134	0.0032	0.00483	-0.00465	-0.00681	-0.00498	-0.00405	-0.00185	-0.00076		134	-0.00741	-0.00344	0.00642	0.00169	-0.000272	0.00279	0.00284	0.01011
134.1	0.000241	8.64e-05	-0.00584	-0.00385	-0.00083	0.00246	0.00289	0.00161		134.1	-0.000304	-0.00818	-0.00306	-0.00364	0.000913	0.00338	0.00284	-0.00648
134.2	-0.000352	-0.00228	8.7e-05	-0.000885	-0.00083	0.00542	-7.27e-05	-0.00254		134.2	-0.00267	-0.00344	-0.00424	0.00465	-0.000864	-0.00254	0.00225	3.53e-05
134.3	-0.000944	-0.000506	-0.00169	-0.00799	-0.00261	0.00424	0.0017	-0.00076		134.3	-0.00741	-0.0064	-0.00128	0.00406	-0.000864	-0.00373	0.00581	-0.000557
134.4	-0.000352	8.64e-05	-0.00169	0.00563	-0.00083	-0.00228	0.00111	0.00279		134.4	-0.00564	0.00544	0.00287	-0.00127	-0.000272	0.00575	-0.00545	-0.00174
134.5	-0.00154	-0.00465	-0.0011	0.000892	-0.00261	-0.00169	-0.00126	0.00516		134.5	-0.00149	-0.00166	-0.0149	-0.00127	0.00151	0.0016	-0.00604	0.003
134.6	0.00143	0.00186	0.00127	-0.00562	0.00154	0.00661	0.00348	-0.00135		134.6	0.0068	-0.000479	0.00761	0.000507	-0.00323	0.00397	0.00225	-0.00174
134.7	-0.00154	-0.00584	-0.00228	0.00385	-0.00794	-0.000501	-7.27e-05	-0.00372		134.7	-0.00504	0.00248	-0.00424	-0.00423	0.00387	0.00101	0.0064	-0.00233
134.8	0.00143	-0.00465	8.7e-05	0.00208	-0.00912	9.17e-05	-0.00244	-0.000168		134.8	-0.00919	-0.00522	-0.000686	-0.000678	-0.000864	-0.00432	0.00284	0.00181
134.9	0.00616	-0.00288	8.7e-05	0.00385	-0.00142	0.00365	0.00052	0.00161		134.9	0.0074	-0.01233	-0.00424	-0.00127	-0.00501	0.00634	-0.000117	0.00537
135	-0.000944	-0.00228	-0.00465	0.000299	-0.00083	-0.00169	-0.00244	-0.00135		135	-0.00564	-0.00107	0.00524	-0.00127	-0.00797	0.00575	-0.000117	0.003
135.1	0.000241	-0.0088	-0.000505	-0.00266	-0.00557	0.00542	-0.00185	-0.00609		135.1	-0.00445	-0.00166	-0.000686	0.00169	0.00624	0.00042	-0.00249	-0.000557
135.2	0.0032	-0.000506	0.00246	-0.000885	-0.00853	0.00424	-0.00126	0.00457		135.2	-0.00682	-0.00463	0.00168	-0.00305	0.000913	-0.000173	-0.00367	0.00122
135.3	-0.00331	-0.00761	0.00305	-0.00266	-0.00379	-0.00109	-0.00303	0.00279		135.3	-0.00267	0.00544	-0.00128	0.00643	-0.00323	-0.00136	0.00758	-0.000557
135.4	0.00202	-0.00406	-0.00524	0.00741	-0.00142	0.00305	0.0017	-0.00372		135.4	-0.00267	-0.00759	-0.00483	0.000507	-0.00679	0.00634	0.00758	-0.00826
135.5	-0.00687	-0.00288	0.000679	-0.00207	-0.00498	0.00128	0.0023	0.00102		135.5	-0.00327	-0.00344	-0.00187	-0.00127	0.01217	0.00101	0.00284	-0.00233
135.6	-0.00272	-0.00347	0.00246	-0.0074	-0.000237	-0.00287	-7.27e-05	0.000425		135.6	-0.00267	0.000113	0.00346	0.00584	0.0021	-0.000173	0.00225	-0.00174
135.7	0.000241	-0.00643	-0.0011	0.000299	-0.00083	0.00424	0.00585	0.0022		135.7	0.00503	-0.00581	-0.00306	-0.000678	-0.0139	0.00101	0.000475	0.003
135.8	0.0038	-0.00465	-0.00465	-0.00266	0.000355	-0.00109	-0.00185	-0.00135		135.8	-0.00267	0.0013	0.00405	-0.00364	-0.00501	-0.000765	-0.00545	0.00359
135.9	0.00143	0.00246	-0.00228	-0.00207	-0.000237	0.00305	-0.00185	-0.00372		135.9	0.00325	-0.00522	-0.00542	0.00465	0.0021	0.00338	-0.00663	0.00537
136	0.00261	8.64e-05	-0.00169	0.000299	-0.000237	-0.000501	-0.0054	-0.00254		136	-0.00682	0.0013	-0.00306	-0.00246	0.00565	-0.00136	-0.00249	-0.0047
136.1	-0.00272	-0.00584	-0.00347	-0.000885	-0.000237	0.00305	0.0017	-0.00135		136.1	-0.000897	-0.00107	-0.00542	0.00347	-0.00383	0.00457	0.00581	0.003
136.2	-0.00864	-0.00406	-0.0011	0.000892	-0.00498	-0.00169	0.00052	0.000425		136.2	-0.00267	-0.00344	0.00879	-0.00127	0.00447	0.00931	-0.0013	0.0024
136.3	-0.000352	-0.00347	0.00305	0.000299	-0.00616	0.00187	0.0017	-0.00431		136.3	0.00266	-0.000479	-0.000686	0.00525	-0.00679	0.0022	0.00344	-0.00115
136.4	-0.00983	-0.00524	0.00186	-0.000885	-0.00557	-0.00228	0.0017	-0.00135		136.4	-0.00208	-0.00344	-0.01016	-0.00305	-0.00323	0.00575	-0.000117	-0.0047
136.5	-0.00509	0.0066	0.00127	-0.000293	0.00391	0.00779	-0.000665	-0.00491		136.5	-0.0086	-0.00403	-0.00246	-0.00838	0.00684	-0.0061	-0.0013	-0.000557
136.6	-0.00805	-0.00288	-0.00584	-0.00266	-0.00201	0.00128	-0.00244	0.00398		136.6	0.00384	0.0013	0.00346	-0.000678	0.0021	0.00516	0.00225	0.00537
136.7	-0.00331	-0.0011	-0.000505	-0.000885	0.000355	-0.00405	0.0017	0.00102		136.7	0.0074	-0.00107	-0.00128	0.00702	-0.0056	0.00516	-0.00249	0.000628
136.8	-0.00568	8.64e-05	0.00364	0.000299	0.000948	9.17e-05	0.00111	-0.01024		136.8	-0.00682	-0.00285	-0.00424	0.00169	-0.00205	0.00338	-0.00604	0.00418
136.9	-0.00272	-0.00465	0.000679	-0.00385	-0.00675	-0.00169	0.00111	-0.00372		136.9	-0.00386	-0.00936	-9.35e-05	0.00525	-0.000864	-0.0055	0.000475	-0.00233
137	0.00557	-0.00169	0.000679	0.000299	-0.00912	0.00187	0.0017	0.00279		137	0.00384	-0.00463	-0.00898	0.00169	0.00387	0.00397	0.00995	-0.00115
137.1	-0.00568	-0.00406	8.7e-05	0.000299	-0.00261	-0.00405	-0.00126	0.00339		137.1	0.00207	-0.00403	0.00642	0.00288	-0.00205	0.00397	0.00995	0.0024
137.2	-0.000944	0.00127	0.000679	0.00326	0.0045	9.17e-05	0.00111	0.0022		137.2	-0.01097	-0.0064	0.00583	0.00228	-0.00264	-0.000765	-0.0096	-0.00174
137.3	-0.0045	-0.00406	0.0072	0.00208	-0.000237	0.00483	0.00052	-0.000168		137.3	-0.01097	-0.00166	-0.00483	0.00465	0.0021	0.0016	0.00225	0.003
137.4	-0.00391	0.00246	0.00127	-0.00325	-0.00735	-0.00169	0.00644	-0.00313		137.4	0.00147	0.0013	0.00109	-0.00482	-0.00501	0.00101	0.00225	-0.00293
137.5	-0.000352	-0.00288	-0.00406	-0.00266	-0.00675	0.00246	0.00348	0.000425		137.5	-0.00445	-0.00463	-0.00306	0.00821	-0.00146	-0.00373	-0.0013	0.00359
137.6	-0.00509	0.00127	0.00364	-0.00207	-0.00498	-0.00169	-7.27e-05	-0.00135		137.6	-0.000897	0.00722	-0.00365	-8.57e-05	-0.00205	-0.000765	-0.0013	-0.00174
137.7	-0.00568	0.00364	0.00186	-0.000885	-0.00083	9.17e-05	-0.000665	0.0022		137.7	-0.01215	-0.00522	-0.00246	0.0011	-0.00857	0.00042	-0.009	-0.00411
137.8	-0.00687	-0.00524	-0.00287	0.00563	0.000355	0.00128	-0.000665	-0.00905		137.8	-0.00978	0.00722	-0.00128	-0.00186	0.00684	0.00812	0.000475	0.00596
137.9	-0.00391	-0.00406	0.00246	0.000299	-0.000237	-0.00109	0.00467	-0.000168		137.9	-0.00267	-0.00403	0.000499	0.00288	-0.00146	-0.00136	0.000475	0.00418
138	0.000833	-0.00465	-0.00169	-0.00385	-0.0032	-0.000501	-0.00244	0.00339		138	-0.00149	-0.00818	0.00346	0.00288	0.000913	-0.000765	0.00166	0.003
138.1	-0.0045	0.00246	-0.000505	-0.000293	-0.00438	-0.000501	-0.00126	-0.00076		138.1	0.000288	0.000113	-0.000686	-0.00186	-0.0056	0.00516	0.00344	-0.00648
138.2	-0.00568	0.00127	0.000679	-0.00266	0.00391	0.000684	0.0017	0.000425		138.2	-0.01334	0.000706	-9.35e-05	0.0011	0.00151	0.00042	0.00344	-0.000557
138.3	-0.00687	-0.00347	-0.0011	-0.00325	0.0045	0.00305	0.00881	-0.00076		138.3	-0.00386	-0.0064	-0.01431	-0.00127	0.00447	-0.00195	-0.00189	0.00359
138.4	-0.0045	-0.00288	0.00838	0.00148	-0.00201	0.00128	-0.00185	-0.00194		138.4	-0.00267	-0.00107	-9.35e-05	0.00465	-0.00323	0.0022	0.000475	-0.00589
138.5	-0.00331	-0.00347	0.0066	0.00741	-0.00616	-0.00287	-0.00185	-0.00194		138.5	0.0074	0.00841	-0.00365	0.00643	0.00151	0.0016	0.00107	-0.0047
138.6	0.000241	-0.0011	0.000679	-0.000885	0.00154	-0.00346	-7.27e-05	-0.00372		138.6	-0.01334	0.00308	-9.35e-05	-8.57e-05	-0.00916	-0.00195	-0.00071	0.00537
138.7	0.00261	-0.00584	-0.00406	-0.00148	0.00154	9.17e-05	0.00052	-0.00491		138.7	-0.00919	-0.00581	0.00524	0.00406	-0.00205	-0.0061	-0.00367	0.00477
138.8	-0.00391	-0.000506	-0.000505	0.000892	-0.000237	-0.00702	0.00289	-0.00491		138.8	0.00207	-0.00107	0.00287	-0.00186	0.00269	0.00694	-0.00367	0.00477
138.9	-0.00509	0.00779	0.0072	-0.000885	-0.00083	0.00246	0.00704	0.00339		138.9	-0.00149	-0.000479	-0.00306	-0.00423	0.00387	0.00753	0.00107	0.00418
139	-0.00509	-0.00524	0.00483	-0.000885	-0.00261	0.00128	0.0017	-0.000168		139	0.000288	0.00248	0.00583	0.00347	-0.00975	-0.00669	0.00284	-0.000557
139.1	-0.00864	-0.00406	0.00364	0.00148	-0.00142	-0.00287	0.00052	0.00576		139.1	-0.00445	-0.00463	-9.35e-05	0.00702	0.000913	-0.00136	-0.00545	0.00951
139.2	-0.00746	-0.0011	0.00305	-0.00207	0.00509	-0.00405	0.00467	-0.00076		139.2	-0.00267	-0.00285	-0.00424	0.00643	0.00032	0.0016	0.00403	0.0024
139.3	-0.00628	0.000679	0.00246	0.00385	-0.00379	-0.00287	-7.27e-05	-0.00787		139.3	-0.00741	0.01433	-0.00187	0.00169	0.0021	0.00042	-0.0013	-0.00233
139.4	-0.000352	-0.000506	-0.00287	0.000299	0.00569	-0.000501	0.00289	0.00813		139.4	0.000288	0.00189	-0.00483	-0.00246	0.00387	-0.000765	0.00521	-0.00352
139.5	-0.00805	0.00423	0.00246	0.00445	-0.00498	-0.00702	0.00111	0.00161		139.5	-0.000304	-0.00818	0.00109	0.00406	-0.00323	-0.00254	-0.000117	0.00477
139.6	-0.00805	-0.00406	0.00186	0.00741	-0.00142	-0.00228	0.0017	-0.00787		139.6	-0.00564	0.0013	0.00287	0.00169	0.00624	0.00516	-0.00249	-0.00233
139.7	0.00143	-0.00169	-0.00524	0.000892	-0.00083	0.000684	0.00407	-0.00668		139.7	-0.00741	-0.00285	0.000499	0.00584	-0.00264	0.00634	-0.00486	0.0024
139.8	-0.00864	-0.000506	0.00897	0.00445	-0.000237	-0.00287	-7.27e-05	-0.00194		139.8	-0.00564	0.00544	-0.00602	-0.00482	-0.00501	-0.0061	-0.00486	0.00122
139.9	-0.00509	-0.00584	0.00483	-0.00148	-0.00201	-0.00169	0.00052	0.00102		139.9	-0.00208	-0.00522	0.00287	-0.000678	0.000913	0.00279	0.00225	0.00714
140	-0.00154	-0.000506	-0.00169	-0.00799	-0.000237	0.00128	-0.000665	-0.00135		140	-0.00386	-0.00344	-0.00483	0.00347	-0.000864	0.00279	0.000475	-0.00233
140.1	-0.00805	0.00305	-0.0011	0.000892	-0.00201	-0.00524	0.0023	-0.00431		140.1	0.00088	0.00308	-0.00898	0.00347	0.00802	-0.00254	-0.00071	3.53e-05
140.2	-0.00272	8.64e-05	0.00364	-0.00148	0.00272	0.00305	0.00111	-0.00313		140.2	-0.00741	0.00248	-0.00306	-0.000678	0.000913	0.00457	0.000475	0.000628
140.3	-0.00331	0.00542	8.7e-05	0.00326	0.00213	-0.00465	0.00644	-0.00609		140.3	-0.00682	0.0013	0.00938	-0.00186	-0.00205	0.00516	-0.000117	-0.00233
140.4	0.000833	-0.0011	0.000679	-0.00148	-0.00379	0.00128	0.00467	-0.00076		140.4	-0.000304	-0.00759	-0.00306	-0.00601	-0.000272	0.00101	-0.00604	-0.00707
140.5	-0.000944	0.00127	0.00305	0.000892	0.000948	-0.00228	0.0017	0.0022		140.5	-0.00267	-0.00403	0.00109	-0.000678	0.0021	-0.00136	-0.00426	0.00359
140.6	-0.000944	-0.0011	0.00127	0.00148	-0.0032	-0.00346	0.00111	-0.00313		140.6	-0.00682	0.00544	-0.00306	0.01709	-0.00738	0.00575	0.00344	0.00596
140.7	-0.00509	8.64e-05	0.00779	-0.000293	-0.000237	9.17e-05	0.00467	-0.00491		140.7	-0.0086	0.00604	0.00465	0.00584	0.00506	-0.00669	-0.000117	0.000628
140.8	0.0032	0.000679	-0.000505	0.00385	-0.00083	-0.00287	-0.00244	0.00457		140.8	0.00858	-0.000479	-0.000686	0.0011	-0.00146	0.00279	-0.00782	-0.00293
140.9	-0.00154	0.00305	0.0072	0.00148	0.00391	0.00128	-7.27e-05	0.000425		140.9	-0.00386	-0.00463	-0.00365	-0.01193	0.00151	0.00042	-0.00545	0.003
141	-0.00331	0.00127	-0.000505	0.00208	-0.00498	9.17e-05	0.0023	-0.00135		141	-0.00741	-0.00226	-0.00661	-0.000678	-0.00501	-0.000173	-0.00367	0.00418
141.1	0.000241	-0.0011	0.00601	0.00563	-0.00557	-0.00465	0.00407	-0.00491		141.1	0.00621	-0.00285	-0.00187	0.00288	0.00151	0.0016	-0.0013	0.00537
141.2	-0.00154	0.00423	0.00246	0.00445	0.000355	-0.00465	0.00348	-0.00313		141.2	-0.00504	0.00367	-0.000686	-0.00186	0.00447	0.00042	-0.00367	-0.00174
141.3	-0.0045	-0.00406	0.000679	0.000299	-0.00261	0.00187	-0.006	0.00102		141.3	-0.00623	0.00248	-0.00483	0.00169	-0.00975	-0.00313	-0.00486	0.00181
141.4	0.0038	0.000679	0.00186	0.000299	0.00569	0.00305	0.00111	0.00398		141.4	0.000288	-0.000479	0.00287	-0.000678	0.00506	-0.00373	0.00107	-0.0053
141.5	-0.00983	-0.00169	8.7e-05	0.00385	0.000948	-0.00346	0.00052	-0.00728		141.5	0.00917	0.0013	0.00287	0.00406	0.000913	0.0022	0.000475	-0.000557
141.6	0.0038	-0.00288	0.00246	0.00445	0.00509	-0.00642	0.00348	0.00279		141.6	0.00325	0.00248	0.00405	0.00288	-0.00146	0.00279	0.000475	0.003
141.7	0.00143	-0.0011	8.7e-05	-0.00207	-0.000237	-0.00287	0.00052	-0.0055		141.7	0.00147	0.0013	-0.00128	0.00525	-0.000864	-0.00254	-0.00071	-0.000557
141.8	-0.00805	-0.00465	-0.00761	0.00504	-0.00379	-0.00346	0.00526	-0.00194		141.8	-0.000897	-0.00107	-0.00128	0.0011	0.00032	-0.00432	-0.00782	0.00537
141.9	0.000241	0.00246	0.00246	0.00326	-0.00142	0.000684	-0.000665	0.00576		141.9	-0.01156	0.000706	-0.00365	0.00465	-0.000272	0.00279	-0.01137	-0.00115
142	-0.00213	-0.00228	0.00186	0.000299	-0.00261	0.00957	0.00644	-0.00313		142	0.00562	-0.00107	0.00109	-0.00186	0.00565	-0.000765	0.00107	3.53e-05
142.1	-0.00568	-0.000506	0.00423	0.00385	-0.00142	-0.00169	0.0017	-0.00372		142.1	0.00621	-0.000479	0.00168	0.00288	0.00861	0.00042	-0.00189	0.0024
142.2	-0.00509	0.00423	0.00897	0.00445	-0.0032	-0.00702	0.0023	0.00516		142.2	0.00088	0.0013	0.00701	0.000507	-0.00442	0.00279	-0.0013	0.00477
142.3	-0.0045	0.000679	-0.00169	-0.000293	0.000948	-0.00465	0.00348	-0.00372		142.3	-0.00564	0.00426	-0.00365	0.0088	-0.00738	0.0016	-0.00189	-0.00293
142.4	-0.0045	-0.00584	0.00483	0.00563	-0.00083	0.000684	0.01	-0.00491		142.4	-0.000304	0.000113	0.00405	-0.00186	-0.0056	0.0016	0.00284	-0.00174
142.5	-0.00272	-0.000506	-0.00761	-0.00503	-0.000237	-0.00287	-0.000665	0.000425		142.5	-0.00327	-0.00581	-0.000686	-0.00127	0.00269	-0.00195	0.00581	0.000628
142.6	0.00202	0.00246	0.00364	0.00267	-0.00557	0.000684	0.00111	-0.0055		142.6	-0.00682	0.00959	-0.00128	0.00406	0.00565	-0.00254	-0.00486	-0.00648
142.7	-0.00983	0.00364	-0.00169	0.00148	0.00213	-0.00228	0.00052	0.00753		142.7	-0.00208	0.00367	0.000499	-0.000678	-0.000272	0.00516	-0.00604	0.00833
142.8	0.000833	-0.00821	8.7e-05	0.000299	-0.00142	-0.00109	0.00526	-0.00313		142.8	-0.00504	0.0013	-0.00661	0.00821	0.00151	0.0016	0.00344	0.0024
142.9	0.00972	8.64e-05	-0.000505	0.00326	0.0045	-0.00109	-0.00244	-0.00076		142.9	-0.000897	0.00485	0.00701	0.00169	0.00269	-0.00787	0.00699	-0.00293
143	-0.00864	-0.000506	0.00423	-0.00148	-0.00142	-0.00702	0.00052	-0.00313		143	0.00088	-0.00344	0.00168	-8.57e-05	-0.00323	0.0022	-0.009	0.003
143.1	-0.00628	0.00127	0.00305	-0.000885	-0.0032	-0.00465	0.00407	0.00161		143.1	-0.00801	0.000706	-0.00306	0.01117	-0.000864	0.00575	0.00344	0.00714
143.2	0.00261	-0.0011	-0.0011	-0.00799	-0.00912	0.00128	0.00467	0.0022		143.2	-0.00149	0.00841	-0.00365	-0.00305	0.00684	-0.00136	-0.0013	-0.00115
143.3	0.000833	0.00305	0.00127	0.00385	-0.00083	-0.00761	0.00704	0.00279		143.3	0.00088	0.00367	0.00701	-0.00542	0.00269	0.00338	0.00166	-0.0053
143.4	0.00143	-0.00288	0.00483	0.00326	0.00332	-0.00642	0.00467	0.000425		143.4	-0.000304	0.00308	-0.00187	0.00406	-0.00442	-0.00847	-0.00486	0.003
143.5	-0.000352	0.00423	0.00364	0.00208	0.00272	0.00365	-0.00126	-0.00194		143.5	-0.000304	0.00544	0.00346	0.00702	0.00151	-0.00906	-0.0013	-0.00174
143.6	0.00557	0.00127	0.00364	0.000892	0.000948	9.17e-05	0.0017	0.00161		143.6	0.00207	-0.00522	0.00642	-0.00423	0.00506	0.00338	-0.00723	0.00774
143.7	-0.00391	0.00364	0.00186	0.00682	-0.00261	-0.00702	0.00526	0.00161		143.7	-0.00682	0.00544	0.000499	0.00406	0.00624	-0.000765	-0.00486	0.00181
143.8	-0.00154	0.00305	0.00127	0.00267	0.000355	-0.000501	0.00052	-0.000168		143.8	-0.000304	0.00841	0.00465	0.00643	0.00447	0.00338	-0.0013	-0.00352
143.9	0.00143	0.00601	0.00364	-0.00148	0.0045	-0.000501	0.0017	0.00161		143.9	0.00503	0.0013	-0.00661	0.00228	-0.00146	0.0016	-0.00308	-0.00352
144	0.000833	-0.00228	0.0072	0.000299	0.0045	-0.000501	0.00644	-0.00313		144	-0.000304	0.00248	-0.00246	-0.00482	-0.000272	-0.00195	-0.01019	-0.01122
144.1	-0.00391	-0.00643	0.00364	0.000299	0.000355	9.17e-05	0.0023	0.0022		144.1	-0.00267	0.00544	0.00701	-0.00542	-0.00679	0.00101	0.00225	0.00892
144.2	0.00794	8.64e-05	0.00423	0.00267	0.00569	-0.00524	0.0017	0.00635		144.2	-0.00564	0.00604	-0.000686	-8.57e-05	-0.00857	0.00338	0.00344	-0.00411
144.3	-0.00272	-0.00584	-0.000505	0.00445	0.00154	-0.00524	0.00644	0.00339		144.3	0.00562	0.00248	-0.00128	-0.00186	0.00151	0.00279	-0.000117	0.0024
144.4	0.0038	-0.0011	-0.000505	0.00148	-0.00379	-0.00346	0.00407	-0.000168		144.4	-0.000897	0.00485	-0.00483	0.00169	0.00387	0.0022	-0.01019	-0.0047
144.5	0.0038	-0.0011	0.00246	0.00504	-0.00083	0.000684	0.00289	-0.000168		144.5	-0.00919	-0.00818	0.00228	0.01413	0.00387	-0.00254	0.00462	0.0024
144.6	0.000241	0.00186	0.00246	-0.00503	0.00569	-0.00228	0.00052	0.0022		144.6	0.00384	-0.00403	0.00524	0.00643	-0.00146	-0.00195	-0.00545	-0.01181
144.7	0.00498	0.00423	0.00127	-0.000293	-0.00261	-0.00761	-7.27e-05	0.000425		144.7	0.00266	0.00485	0.00346	-0.00779	0.00032	-0.00254	-0.00367	0.00418
144.8	0.000833	0.00423	0.00305	-0.000885	0.00154	-0.00405	-0.00126	0.00279		144.8	0.00858	0.00426	-0.00424	-0.00246	-0.00205	0.00575	-0.01078	0.00714
144.9	-0.00391	0.00542	0.00423	-0.000293	-0.00083	-0.0082	0.00467	0.00813		144.9	-0.00682	-0.0064	0.00524	0.0011	-0.00264	0.00042	-0.000117	0.0024
145	0.0038	8.64e-05	-0.00524	-0.000885	0.00391	-0.00346	0.00585	0.00161		145	-0.00267	-0.00107	0.00405	0.00347	0.00328	0.00397	0.00403	3.53e-05
145.1	-0.0045	8.64e-05	0.00186	-0.000885	0.00569	-0.00169	0.0023	0.00161		145.1	0.00384	-0.00107	0.000499	0.0011	0.000913	-0.01084	-0.00189	0.00181
145.2	0.000833	0.000679	0.00423	-0.00148	0.00628	-0.00465	-0.00185	-0.00135		145.2	0.00562	-0.000479	0.00346	-0.00186	0.0021	-0.000173	-0.01019	-0.00411
145.3	-0.00628	0.00542	0.00186	0.00208	-0.000237	-0.00169	0.01	-0.00076		145.3	0.00443	0.00367	-0.000686	-0.00719	0.00032	-0.00254	-0.00841	-0.00411
145.4	0.00143	-0.000506	0.00186	0.00445	0.00154	-0.00405	0.00526	0.00457		145.4	-0.00445	-0.00226	0.00938	-8.57e-05	-0.00501	-0.00254	0.00344	-0.00115
145.5	0.0038	0.00601	-0.00465	-0.000293	-0.00912	-0.00287	-0.000665	0.000425		145.5	0.00088	-0.00522	0.00405	0.0011	0.000913	0.0016	-0.000117	-0.00707
145.6	0.00913	0.00246	0.00779	0.00267	0.000355	-0.00346	-7.27e-05	0.00339		145.6	0.0074	-0.00107	-0.00661	-0.00127	-0.00738	0.00516	-0.00604	0.00359
145.7	-0.000944	0.00246	0.00127	-0.000293	-0.00201	0.00128	-0.00126	-0.000168		145.7	-0.000304	0.00308	-9.35e-05	-0.00482	-0.000864	0.00042	-0.00189	0.00359
145.8	-0.00391	0.00305	0.000679	-0.00207	0.00213	-0.000501	0.00526	0.00457		145.8	0.01273	-0.00818	0.00524	0.00465	0.00328	-0.00195	-0.00071	-0.00115
145.9	-0.000944	-0.00288	0.0066	0.00267	-0.00261	-0.00109	0.00407	-0.000168		145.9	0.00088	0.00308	0.000499	-0.00364	0.00921	0.00279	0.00344	-0.00648
146	0.000833	-0.00465	-0.00524	-0.000293	-0.00261	-0.00465	0.00467	-0.00254		146	-0.00386	0.00367	0.000499	-0.0066	-0.00146	-0.00669	0.00403	-0.000557
146.1	0.00676	0.00364	0.00423	-0.000885	0.00391	-0.00465	0.00644	0.00398		146.1	0.00088	0.00308	-0.00306	0.00169	0.00032	0.00042	-0.01019	-0.00174
146.2	-0.00272	0.00423	-0.000505	0.00267	0.00569	-0.00287	0.00348	0.00339		146.2	-0.00623	0.00248	0.00228	0.00998	0.00151	-0.00254	-0.0013	3.53e-05
146.3	0.000241	-0.00347	0.00779	-0.00148	0.00154	-0.00109	0.00526	0.00635		146.3	0.00384	0.00426	-0.00246	-8.57e-05	0.00269	-0.00254	0.00166	-0.00589
146.4	0.00202	0.00423	0.00364	-0.00503	0.00154	-0.00169	0.0023	-0.00135		146.4	-0.00564	0.00663	0.00287	-0.00542	-0.00501	0.00694	-0.0013	3.53e-05
146.5	0.00498	0.0066	0.00186	0.00385	0.000948	-0.00228	-0.00126	0.00813		146.5	0.00088	-0.00403	-0.00187	-0.00127	-0.00205	-0.00373	-0.00071	0.003
146.6	-0.000944	-0.00169	-0.00287	-0.00266	0.000355	-0.00287	0.00052	0.00279		146.6	0.00325	-0.00226	0.000499	-0.00186	-0.00146	-0.00906	0.00225	0.00181
146.7	0.00439	8.64e-05	0.00542	0.00326	-0.00438	0.00661	-0.000665	0.00576		146.7	0.00621	-0.00285	-0.00187	0.00406	0.00032	0.01464	-0.01137	-0.00233
146.8	-0.000352	-0.00169	0.00483	0.00267	-0.00201	-0.00346	0.00348	0.000425		146.8	0.000288	0.01078	0.00642	0.00169	0.00921	-0.00669	-0.00723	-0.01122
146.9	0.0038	0.00186	0.000679	-0.00148	0.00213	0.000684	0.00704	0.00398		146.9	0.00266	0.000706	0.00168	-0.00246	0.000913	-0.0055	0.00225	-0.00115
147	0.000241	0.00542	8.7e-05	-0.00266	0.0045	-0.00109	-0.000665	0.00576		147	0.00266	-0.00166	0.00168	-0.00601	0.0021	0.00575	0.00758	0.000628
147.1	-0.000944	0.00423	0.000679	0.00208	0.0045	-0.00346	-0.00363	-0.00194		147.1	-0.00208	0.0013	0.00287	-0.00364	-0.00205	0.00279	0.00107	-0.00115
147.2	0.0038	-0.00406	-0.00406	-0.00148	-0.00438	-0.00169	0.00111	-0.00313		147.2	0.00384	-0.00107	-0.00483	0.00169	-0.00442	0.0016	0.000475	-0.00115
147.3	0.000833	-0.00169	0.000679	-0.00207	0.00213	-0.00346	0.0023	0.00635		147.3	0.00621	0.00959	0.00405	-0.00305	-0.00264	-0.00432	-0.00367	0.00359
147.4	-0.00331	0.00897	-0.00228	-0.000293	-0.00142	-0.000501	-0.000665	0.00279		147.4	0.0068	0.009	-0.01076	-0.0066	0.00151	-0.00669	-0.00782	-0.00411
147.5	0.000833	0.00127	-0.00524	-0.00148	0.00213	-0.00109	-7.27e-05	-0.00194		147.5	-0.00149	-0.01173	0.00879	0.00643	0.0098	-0.000173	-0.00189	-0.01181
147.6	0.0032	-0.00347	-0.000505	0.00208	-0.00142	0.00305	0.0023	0.0022		147.6	-0.000897	0.00189	0.00465	-0.00186	0.00151	0.00575	-0.000117	-0.000557
147.7	0.00261	8.64e-05	0.00364	0.000299	-0.00083	-0.00287	0.00348	0.00576		147.7	0.00147	-0.00344	-0.00187	0.00347	-0.00146	0.00634	-0.00841	-0.00293
147.8	0.00261	0.00127	-0.00406	0.000892	0.00391	-0.00109	0.00407	0.00813		147.8	0.00147	0.00367	-9.35e-05	0.00465	-0.00323	-0.0055	-0.00189	0.003
147.9	-0.000352	0.00305	-0.00347	-0.00385	-0.00083	-0.00109	-0.000665	0.00398		147.9	0.00799	-0.000479	0.000499	0.00169	0.00032	0.00694	0.00344	0.00477
148	-0.00568	-0.00347	-0.0011	0.00563	-0.000237	-0.00346	-0.00303	-0.00372		148	0.00088	0.000706	-0.000686	0.00228	-0.00264	0.00101	0.00758	-0.0053
148.1	0.0032	0.00246	0.00186	0.00445	-0.000237	-0.00524	0.00526	0.00398		148.1	-0.00386	0.00841	0.00701	-0.00542	-0.0056	-0.00195	-0.0013	-0.00233
148.2	-0.00154	-0.0011	0.00779	-0.00266	-0.00794	0.000684	0.00407	0.00872		148.2	0.00503	0.00485	-0.00187	0.00465	0.000913	-0.00373	-0.00308	-0.0053
148.3	-0.00628	0.00483	-0.0011	-0.00444	0.000948	0.00365	-7.27e-05	0.00339		148.3	0.01273	-0.00463	0.000499	0.00288	-0.00442	-0.00254	-0.00545	-0.00233
148.4	0.00676	8.64e-05	-0.00524	-0.00207	-0.00261	-0.00405	0.00052	0.000425		148.4	-0.000304	0.00248	-0.00187	-0.00364	0.00328	0.00457	-0.00071	0.00655
148.5	0.0032	0.00542	8.7e-05	0.00385	0.00391	-0.00524	-0.00126	0.00516		148.5	-0.00208	0.00485	-9.35e-05	-0.00482	-0.000864	-0.0055	0.01351	0.0024
148.6	-0.00628	-0.000506	-0.000505	0.00267	0.00865	-0.00405	-0.00126	0.00576		148.6	0.0074	0.00485	-9.35e-05	0.00762	-0.00146	0.00279	0.00166	0.000628
148.7	-0.000944	-0.0011	0.00127	0.000892	-0.00261	9.17e-05	0.00407	0.00753		148.7	0.00562	-0.0064	-9.35e-05	0.0011	-0.0056	0.00101	-0.00189	-0.00707
148.8	0.000833	-0.00288	0.00423	-0.00385	-0.00142	-0.00465	-0.00363	0.0022		148.8	-0.00327	0.00189	0.00524	0.00584	0.00624	0.00042	-0.00367	-0.00589
148.9	0.0032	-0.000506	-0.00465	-0.00562	0.00272	0.00128	0.00348	-0.00076		148.9	0.00147	-0.00226	-0.00306	0.0011	0.00032	0.00279	0.0064	0.0024
149	-0.00687	0.00246	-0.00287	0.00267	0.00332	-0.00109	-0.00244	-0.00135		149	-0.00327	-0.00226	0.00109	-0.00482	-0.000864	-0.00254	0.00284	0.000628
149.1	0.00439	0.00127	0.00186	0.000892	0.000948	0.000684	0.0017	0.000425		149.1	-0.00327	0.009	0.0082	-0.00186	-0.000864	-0.00373	-0.00426	-0.00648
149.2	0.0032	0.00246	-0.00524	-0.00444	-0.00201	-0.000501	-0.00244	0.00457		149.2	-0.00327	0.000706	-0.00424	-0.000678	-0.00205	0.00279	-0.00071	-0.00352
149.3	-0.00568	0.00186	0.00186	-0.00325	-0.00083	-0.00169	-0.00303	0.00457		149.3	-0.00149	-0.00581	-0.00661	0.00347	-0.00442	0.00101	-0.00367	0.00655
149.4	-0.00154	-0.00169	0.00305	-0.00503	0.000355	-0.00405	0.00526	0.00516		149.4	-0.000304	0.00485	-0.00839	-0.00305	-0.00264	0.0099	0.00225	-0.0047
149.5	0.00261	0.00305	-0.0011	-0.00207	0.00213	-0.00702	0.0023	0.00635		149.5	0.00503	0.000113	0.00168	-0.00246	0.00032	-0.00432	0.00344	0.003
149.6	0.000241	-0.00643	-0.00287	-0.00266	0.000355	0.000684	0.00111	0.00635		149.6	0.00325	0.00722	0.00524	0.00465	-0.00323	0.00042	-0.00782	-0.0053
149.7	0.000241	0.00246	-0.0011	-0.00918	-0.00201	9.17e-05	-0.006	0.00694		149.7	-0.000897	-0.00166	-0.00246	-0.00423	0.0021	-0.00136	0.00107	-0.00411
149.8	-0.00391	0.00246	-0.00228	-0.00266	0.00391	-0.00346	-0.00185	0.00161		149.8	0.000288	0.00308	0.00287	-0.00482	-0.000272	-0.00195	-0.00486	0.000628
149.9	0.00439	0.00186	0.000679	0.000892	0.00213	-0.00405	-0.000665	0.0022		149.9	-0.00267	-0.00463	0.00346	-0.00246	-0.00205	-0.00136	-0.00189	-0.00944
150	0.0038	-0.00939	-0.00347	-0.00444	0.0045	0.00187	0.0017	0.00516		150	-0.00623	0.00426	0.00761	-0.00542	-0.00679	0.00042	-0.00071	-0.00411
150.1	0.0032	-0.000506	-0.00406	-0.000293	-0.00557	-0.00642	-0.00244	-0.00076		150.1	0.00325	0.000706	-0.00424	0.00525	-0.000864	0.00634	0.00403	-0.0047
150.2	-0.000352	0.00246	-0.00406	-0.00207	0.000948	-0.00346	0.0017	-0.00254		150.2	-0.00386	-0.0064	0.00583	-0.01016	0.00328	-0.00195	-0.00189	-0.00885
150.3	0.00616	0.00305	0.00305	-0.00385	-0.00201	-0.00228	-0.00363	0.0022		150.3	-0.00445	-0.00226	0.00109	-0.00186	-0.00323	0.00812	0.00166	0.0024
150.4	-0.0045	0.00246	-0.000505	-0.00148	-0.000237	0.00246	-0.00126	0.00339		150.4	-0.00267	0.00485	-0.000686	0.00347	0.00447	-0.00195	-0.00249	0.00537
150.5	0.00439	-0.00524	-0.00584	-0.00503	0.00213	-0.00346	0.0017	0.00398		150.5	0.00384	-0.00403	-0.00365	-8.57e-05	-0.000272	-0.00313	-0.00189	-0.01004
150.6	0.00498	0.00246	0.00127	-0.00207	-0.00142	-0.00346	-0.00481	0.00398		150.6	0.00147	0.00367	0.00583	-0.00779	0.0021	0.0016	0.00462	-0.00944
150.7	0.00202	0.00305	-0.00584	0.000299	0.00332	-0.000501	0.0023	-0.00431		150.7	-0.00623	-0.00403	0.00405	-0.00482	0.00624	-0.0061	0.00225	-0.00411
150.8	0.000241	0.000679	0.000679	-0.000885	-0.00853	-0.00169	-0.00126	0.00161		150.8	-0.00564	-0.00996	0.00287	0.00228	-0.00383	-0.00313	-0.00071	-0.00174
150.9	-0.00213	-0.00347	-0.00287	-0.00325	-0.00142	0.00365	-0.00244	0.00872		150.9	-0.00208	0.0013	-0.00779	-0.00305	-0.00797	0.00338	0.00284	0.01011
151	0.0038	0.00542	-0.00465	-0.00859	-0.00083	-0.000501	0.00052	-0.00076		151	0.00562	-0.01173	0.00642	0.00169	0.00447	0.00279	-0.00189	-0.00707
151.1	0.0032	0.00364	0.00127	-0.000885	0.00272	0.00128	0.0017	0.0022		151.1	0.00088	-0.000479	-0.00187	0.00643	-0.000864	0.00042	-0.0013	-0.00174
151.2	0.00794	-0.00169	-0.00228	-0.000885	-0.000237	-0.00287	0.00348	-0.00076		151.2	-0.00564	0.00663	-0.00128	-0.000678	0.00269	0.00575	0.00166	0.000628
151.3	-0.000944	-0.00228	8.7e-05	-0.000293	-0.000237	9.17e-05	-0.00718	-0.00254		151.3	-0.01097	-0.00166	-0.00483	-0.000678	-0.00205	-0.00313	0.00284	-0.000557
151.4	0.000241	8.64e-05	-0.00287	-0.00148	-0.00201	-0.00169	0.0017	-0.00431		151.4	-0.000304	-0.00877	-0.00187	0.00288	0.0021	-0.00313	-0.00663	0.00359
151.5	0.0032	8.64e-05	8.7e-05	-0.00325	-0.00261	-0.00346	0.00467	-0.00135		151.5	0.00621	0.00189	0.00701	0.00347	-0.00383	-0.00195	0.0064	0.000628
151.6	0.000241	-0.00288	-0.00228	-0.00799	-0.00201	0.00542	-0.00481	0.00279		151.6	-0.000897	-0.00226	-0.00306	-0.00897	0.00151	-0.00491	-0.00367	-0.00293
151.7	0.00853	-0.00524	0.00542	0.00326	-0.00083	-0.00169	-0.000665	-0.00194		151.7	-0.000897	-0.01173	-0.000686	0.000507	-0.0056	0.00101	0.00521	-0.00411
151.8	-0.000944	8.64e-05	-0.00406	-0.00562	-0.00261	9.17e-05	-0.00244	-0.000168		151.8	-0.00208	-0.00403	-0.00306	0.00228	-0.00264	0.01286	0.00818	-0.00352
151.9	0.0038	-0.00169	0.00246	0.00148	-0.00142	-0.00405	0.0023	-0.00135		151.9	-0.000897	0.00248	-0.00306	-0.00186	0.00032	-0.00847	-0.00189	-0.00707
152	0.00853	8.64e-05	-0.00584	-0.000885	0.00272	-0.000501	-0.000665	0.00457		152	0.00325	-0.00285	-0.00128	0.00584	-0.00857	-0.00254	-0.0013	0.003
152.1	-0.00391	-0.00406	0.000679	-0.000885	0.000355	0.00246	-0.00185	0.00279		152.1	-0.00208	-0.00344	-0.000686	0.00228	0.000913	0.00812	-0.000117	0.00477
152.2	0.000833	-0.0011	0.00127	-0.00444	-0.000237	-0.00109	0.00052	0.00576		152.2	-0.00267	-0.00285	-0.000686	-0.000678	0.00269	0.0016	-0.00663	-0.000557
152.3	0.00261	-0.00288	-0.00287	-0.00385	0.0045	0.00305	0.0017	0.00161		152.3	-0.00801	-0.00344	-0.000686	-0.00127	-0.000864	-0.000765	0.00521	0.00122
152.4	-0.0045	-0.00406	-0.00287	0.00385	-0.00261	0.00365	0.00052	-0.00372		152.4	-0.00682	-0.00344	-0.00542	-0.00186	-0.00383	-0.00254	0.00225	-0.00174
152.5	-0.00509	0.00246	-0.00228	0.000892	0.01102	-0.00228	0.0017	-0.00431		152.5	0.00207	0.0013	0.00346	-0.00127	-0.00205	-0.000765	0.00462	-0.000557
152.6	0.00616	-0.000506	0.00423	-0.000885	-0.00142	-0.00109	-0.00363	-0.00254		152.6	-0.000897	0.000113	-0.00365	0.0011	-0.01093	0.00338	0.00936	-0.00707
152.7	0.00143	-0.00406	-0.000505	-0.00444	-0.00735	-0.00346	-0.0054	0.00398		152.7	-0.00267	0.00248	0.00287	0.00288	-0.000864	0.00457	0.00344	0.00359
152.8	0.00202	-0.00761	-0.00821	-0.00148	-0.00261	0.00602	-0.000665	0.0022		152.8	0.00621	-0.0064	0.000499	0.00288	0.00269	-0.00491	-0.00249	-0.0047
152.9	-0.00924	-0.000506	-0.00584	-0.00266	0.00628	0.00838	0.0017	0.00161		152.9	-0.00208	0.000113	-0.00187	-0.00601	-0.00442	0.00634	-0.00486	0.00359
153	-0.00391	0.00305	-0.00584	-0.000885	-0.00735	-0.00287	-0.00837	0.0022		153	-0.00267	0.00604	-9.35e-05	-0.00838	-0.00975	-0.00373	-0.00367	-0.01063
153.1	-0.00391	-0.0088	0.00186	-0.000293	-0.00794	0.00365	0.00289	0.00279		153.1	0.00207	0.00485	-0.000686	0.00347	-0.00501	0.00279	0.00344	0.000628
153.2	0.00498	-0.00406	8.7e-05	-0.00148	0.000948	0.00542	-0.00185	0.00161		153.2	-0.00741	0.00248	0.00524	0.01413	0.00506	0.00516	0.00284	-0.00233
153.3	0.00202	0.00186	8.7e-05	0.000892	0.0045	0.00128	-0.00363	0.00398		153.3	0.00088	-0.00463	-0.000686	0.00169	0.00269	0.0022	-0.00604	0.003
153.4	0.00498	-0.00169	-0.00465	-0.00148	-0.00083	0.00128	0.00111	0.00161		153.4	0.000288	-0.00581	-0.00128	-0.00246	-0.000272	0.0022	-0.00249	0.00418
153.5	-0.000944	0.000679	-0.00465	-0.00325	-0.00794	0.00246	-0.0054	0.00398		153.5	-0.000897	-0.00226	-0.00246	-0.00482	0.01039	-0.00728	0.00581	-0.01063
153.6	-0.00687	-0.00643	-0.000505	-0.00385	-0.00498	-0.00228	-0.00422	0.00279		153.6	-0.00504	-0.00818	-0.00839	-0.00364	-0.00679	-0.00136	0.00521	0.000628
153.7	-0.00272	-0.00643	-0.00465	-0.00325	0.00213	-0.00405	0.00111	0.000425		153.7	-0.00149	-0.00581	-0.00246	0.00643	-0.00205	0.00753	-0.000117	0.00359
153.8	0.0032	-0.00169	-0.000505	0.000892	0.000948	0.00838	-0.01014	0.0022		153.8	0.01036	0.00367	-0.00424	0.00288	-0.000864	0.00634	0.00758	-0.000557
153.9	-0.00272	-0.00761	0.00186	-0.00266	0.00154	-0.00346	-0.00481	0.00576		153.9	-0.00978	0.00189	0.00405	0.00228	-0.0056	0.0022	-0.000117	0.00537
154	-0.01101	-0.00524	0.00127	-0.00148	-0.00912	-0.00228	-0.00481	0.00102		154	-0.00327	-0.00285	0.00109	-0.00779	-0.00146	0.00457	0.00107	0.00359
154.1	-0.00864	0.000679	-0.00702	-0.00562	0.000355	0.00246	-0.006	-0.00135		154.1	0.00088	-0.00463	0.00287	-0.00246	-0.000864	-0.00373	-0.00071	-0.00115
154.2	-0.00687	-0.00465	-0.00761	-0.000885	-0.00438	-0.000501	-7.27e-05	0.0022		154.2	-0.00267	-0.00581	-0.00187	0.000507	-0.000272	-0.00669	-0.00367	0.00122
154.3	-0.00509	-0.00288	-0.0011	0.00682	0.0045	0.000684	0.0023	-0.00254		154.3	0.00207	0.00189	0.00109	0.00465	-0.00264	-0.00906	0.000475	0.000628
154.4	0.00439	-0.00524	-0.00643	-0.01036	-0.00438	0.00483	0.00052	-0.00135		154.4	0.00088	0.00663	0.000499	-0.000678	-0.00264	0.00694	0.00581	3.53e-05
154.5	-0.00568	0.00483	-0.0011	0.000892	-0.00142	-0.00109	-0.0054	0.00398		154.5	-0.01037	0.000706	-0.0072	-8.57e-05	-0.00146	0.00279	-0.00189	-0.00885
154.6	-0.00864	-0.00761	-0.00287	0.00563	-0.00379	-0.000501	-0.00244	0.00279		154.6	0.00384	0.00367	-0.00542	-0.00186	0.00269	0.0016	0.00284	-0.00826
154.7	-0.00864	-0.00702	-0.00287	0.00445	-0.00379	0.00365	0.0017	-0.00076		154.7	0.00266	0.00485	-9.35e-05	0.00347	-0.0062	0.00753	0.00521	0.00359
154.8	-0.00746	-0.00465	-0.0011	-0.00148	0.000355	0.00305	-0.00185	0.00161		154.8	-0.00445	-0.00522	0.00524	-0.00305	0.00151	-0.00136	-0.00723	0.00181
154.9	-0.00687	0.00423	-0.00228	-0.00562	-0.0032	0.00542	0.0017	-0.00491		154.9	0.00562	-0.00522	-0.00187	0.00288	-0.00264	-0.000765	0.00225	0.0024
155	-0.0045	-0.0088	0.0066	0.00267	-0.00557	-0.00169	0.00289	-0.00194		155	0.0068	-0.00107	-0.01135	0.00525	0.00151	0.0016	0.00166	0.00418
155.1	-0.00331	-0.00347	0.00186	0.000299	-0.00616	0.00246	-0.00303	0.00279		155.1	-0.01334	-0.00226	-0.00306	-0.00779	0.00032	-0.00491	0.000475	-0.0047
155.2	-0.01279	-0.00169	-0.00524	0.00148	-0.000237	0.00246	-0.00126	-0.000168		155.2	-0.01274	-0.00759	0.00642	0.00465	-0.00323	-0.00491	0.00462	-0.0047
155.3	-0.00805	-0.00761	-0.0011	0.00208	-0.00261	0.00365	-0.000665	0.00161		155.3	0.00147	0.00367	-0.00661	-0.00305	-0.00205	-0.00195	-0.00723	0.003
155.4	-0.01101	-0.00702	-0.00406	0.00208	-0.00379	0.00483	0.00052	0.000425		155.4	0.00088	0.00426	0.00524	0.01117	-0.0062	-0.00373	-0.00308	0.00477
155.5	-0.00628	8.64e-05	8.7e-05	-0.00385	-0.00201	-0.000501	-0.00244	-0.00076		155.5	0.00088	0.00248	-0.00424	0.00525	-0.000864	0.00575	0.00462	0.00122
155.6	-0.01042	8.64e-05	0.00423	0.000299	-0.00201	0.00128	0.00289	-0.000168		155.6	-0.00564	0.000706	0.00524	-0.00246	0.00387	-0.00195	0.00344	0.00122
155.7	-0.00924	-0.00288	-0.000505	-0.00207	-0.00083	-0.00228	0.00407	0.00279		155.7	-0.000897	-0.00107	-0.000686	-0.00186	-0.00205	0.00694	-0.00426	3.53e-05
155.8	-0.00331	-0.01176	0.00246	0.000892	-0.00142	0.00424	-0.000665	0.000425		155.8	-0.00741	-0.00107	-0.00246	-0.00423	-0.000864	0.00634	-0.0013	-0.00174
155.9	-0.00331	-0.00347	-0.00702	0.00504	-0.0032	0.00542	-0.00244	0.000425		155.9	0.00088	-0.007	0.000499	-0.00246	-0.00975	-0.00254	-0.00071	0.00181
156	-0.00628	8.64e-05	0.00779	0.000299	-0.000237	0.00305	-7.27e-05	-0.00254		156	0.00621	-0.00107	-0.00246	-0.00305	0.00032	0.00871	0.00284	0.000628
156.1	-0.00509	-0.0011	0.00542	-0.00325	-0.00853	-0.00287	-0.00303	-0.0055		156.1	-0.00208	-0.00581	0.00168	0.00702	0.00684	-0.000765	-0.00189	-0.00174
156.2	-0.00687	-0.00524	-0.00524	-0.00148	-0.00201	-0.00346	-7.27e-05	0.00161		156.2	-0.000304	-0.00285	-0.00246	0.00525	-0.00205	0.0022	-0.00367	0.003
156.3	-0.00805	-0.00406	-0.00524	0.00326	-0.0032	0.00602	-0.000665	0.00102		156.3	0.00917	0.00367	-0.00365	0.00347	-0.00501	0.00279	-0.00486	0.00359
156.4	-0.00509	0.00483	-0.00406	0.000892	-0.00616	-0.000501	0.00052	0.000425		156.4	-0.01097	-0.000479	0.00998	0.00169	-0.0056	0.0016	-0.0013	-0.00174
156.5	-0.00687	-0.00465	0.00305	-0.00148	0.00272	0.00838	0.00407	-0.00254		156.5	0.00147	-0.01529	-0.00365	-0.00779	0.00624	-0.000765	-0.0013	0.00418
156.6	-0.00746	-0.00169	-0.00228	-0.00266	-0.00379	-0.00169	0.00111	-0.00313		156.6	-0.00682	0.0013	-0.00542	0.00525	0.0021	-0.00906	0.00284	0.00122
156.7	-0.00864	-0.00406	-0.00287	0.00504	-0.00498	0.00483	0.00052	-0.00313		156.7	-0.00386	-0.00226	0.000499	0.00643	0.00447	0.00101	0.00699	0.00122
156.8	-0.00331	0.00364	-0.00465	-0.000885	0.00332	-0.000501	-0.00244	0.00635		156.8	0.00621	-0.00996	-0.00898	-0.00186	0.00032	0.00338	-0.00426	0.00181
156.9	-0.00924	-0.00347	0.00305	-0.000885	0.00272	9.17e-05	-0.00481	-0.00135		156.9	0.00858	0.00722	-0.00306	-0.00423	0.00387	0.00042	-0.01256	0.00537
157	-0.00687	-0.00998	-0.00347	-0.000885	-0.01031	0.00305	0.00644	-0.00135		157	-0.00327	0.00308	0.00168	0.00465	-0.00323	-0.00373	-0.00545	-0.00589
157.1	0.00498	-0.00169	-0.0011	-0.00148	-0.00557	-0.00169	-0.00303	0.00279		157.1	-0.00267	-0.00463	-0.00542	0.01117	0.000913	0.00694	0.00225	0.00951
157.2	0.000833	-0.0011	0.00423	-0.000293	-0.0032	0.00128	-0.00363	0.00339		157.2	0.00207	0.000113	-0.00306	0.0088	-0.00383	0.0016	-0.00189	0.0024
157.3	-0.00628	-0.00524	-0.00584	0.00385	-0.00379	0.00305	0.00467	0.000425		157.3	0.00503	-0.00818	-9.35e-05	-0.00186	-0.00501	0.0022	0.00166	0.00122
157.4	0.000241	-0.00406	0.000679	0.000299	-0.00379	-0.000501	0.00052	0.00279		157.4	0.00325	-0.00877	0.00287	-0.000678	-0.000272	-0.0061	0.00699	0.01011
157.5	-0.000352	-0.00228	0.000679	-0.00562	-0.00438	-0.00583	0.00407	-0.00254		157.5	-0.000897	0.00722	-9.35e-05	0.00762	0.00743	0.00101	-0.000117	0.00418
157.6	-0.00924	-0.00761	0.00186	0.000892	-0.00083	0.000684	0.0023	-0.00787		157.6	0.00325	0.00367	-0.00483	0.0011	-0.00264	-0.000173	-0.01078	-0.01004
157.7	-0.00509	-0.00524	0.00423	0.00445	-0.00557	-0.00109	0.00348	-0.00254		157.7	0.00503	-0.00818	-0.00483	-0.0066	-0.00264	0.00338	-0.0013	3.53e-05
157.8	-0.00805	0.00186	0.00423	0.000299	0.00213	-0.00761	-7.27e-05	0.00339		157.8	-0.01334	-0.00226	-0.00602	0.00525	-0.00205	-0.0055	0.00462	-0.000557
157.9	-0.00628	-0.00465	-0.00169	0.00741	0.00391	0.00365	-0.00244	-0.00076		157.9	0.00325	0.0013	-0.00365	0.0011	0.000913	0.00457	-0.00071	-0.00115
158	-0.0045	-0.00406	0.00364	-0.000293	-0.00794	-0.00939	-0.000665	-0.00313		158	0.00147	0.00663	0.00109	0.00347	0.00151	-0.00906	0.000475	-0.000557
158.1	-0.00154	-0.00288	-0.0011	-0.000885	-0.00616	-0.00405	-0.00363	-0.00076		158.1	0.00562	-0.00403	-0.00602	0.00169	0.00032	0.00338	-0.00723	-0.00174
158.2	-0.01042	-0.00465	-0.00228	0.000892	0.0045	-0.00287	-0.00244	0.00161		158.2	0.000288	-0.00403	0.00524	0.00169	0.00032	0.01227	-0.00604	3.53e-05
158.3	-0.00628	-0.00347	-0.00228	-0.000885	-0.00498	-0.00702	0.00526	-0.00372		158.3	-0.00149	-0.00759	0.000499	0.00347	0.00269	0.00338	0.00818	0.00596
158.4	0.000833	-0.000506	-0.0011	0.000892	-0.00379	-0.00524	-0.000665	-0.00254		158.4	-0.00327	-0.00166	0.00287	0.00525	-0.000864	-0.00195	0.00403	0.00418
158.5	-0.00272	-0.00347	0.00423	-0.00266	-0.00498	-0.00761	0.0017	-0.00194		158.5	-0.00327	-0.00581	-0.00306	0.00998	0.00151	-0.00254	0.00462	-0.00411
158.6	-0.00805	0.00186	0.000679	0.00563	-0.00083	-0.00583	0.00644	-0.00313		158.6	-0.000304	-0.00344	-0.00306	0.0011	0.00624	0.0016	-0.00486	0.00477
158.7	-0.00272	8.64e-05	-0.00761	-0.000293	-0.00438	-0.000501	0.00052	0.00161		158.7	0.00266	-0.00107	-0.00128	-8.57e-05	-0.00679	0.00397	-0.00426	-0.00411
158.8	-0.00687	-0.00584	0.0072	-0.00148	-0.00261	-0.00169	0.0023	-0.00194		158.8	0.00266	0.00781	-9.35e-05	0.00288	-0.000272	0.0016	0.00818	-0.00115
158.9	-0.00509	-0.00406	8.7e-05	0.00326	-0.00142	-0.00583	0.00763	0.00339		158.9	0.00384	0.0013	-0.00365	-0.00305	-0.000272	-0.0061	-0.00663	0.00537
159	-0.00687	0.00127	-0.000505	-0.00266	0.00391	-0.00642	-0.00422	-0.00431		159	0.00621	-0.00877	0.00287	-0.00186	-0.00323	-0.00313	-0.000117	0.01188
159.1	-0.00154	-0.0011	0.000679	0.00385	-0.00616	-0.00287	-0.00777	0.00398		159.1	-0.00327	-0.00463	-9.35e-05	-0.000678	0.00151	0.00694	-0.00486	0.00181
159.2	-0.00391	-0.00288	0.0066	0.000892	-0.00201	-0.00465	0.00467	-0.00076		159.2	-0.00801	-0.00226	-0.00306	0.00643	0.00032	0.00338	-0.00782	-0.00589
159.3	-0.0045	-0.00347	0.00364	0.000892	-0.00438	-0.00169	0.00526	-0.00431		159.3	0.00088	0.00308	-0.000686	-8.57e-05	0.00151	0.00279	0.00344	0.00418
159.4	0.00202	0.00246	0.00186	0.00385	-0.00438	0.00305	0.00348	0.00102		159.4	0.000288	-0.000479	-0.00128	-0.00719	0.00151	0.01108	-0.0013	0.00477
159.5	-0.00628	-0.00228	0.00186	0.00563	-0.00557	-0.00169	0.00585	0.000425		159.5	-0.00445	-0.00996	0.00701	0.01235	-0.00442	-0.000765	-0.00071	0.000628
159.6	-0.00568	-0.00702	8.7e-05	0.00326	-0.00498	-0.00228	-0.00363	0.00339		159.6	-0.00741	-0.00226	-0.00365	-0.00305	0.00269	-0.00373	-0.00426	-0.000557
159.7	-0.00154	0.00305	0.00542	0.00622	0.00391	-0.00405	-0.00244	-0.00313		159.7	-0.00445	0.01315	-0.00424	-0.00246	0.00684	-0.00254	-0.00189	-0.01004
159.8	-0.00746	0.00127	-0.0011	0.000892	-0.00557	0.00305	0.00822	-0.00135		159.8	0.00207	-0.01055	-0.00483	0.00821	-0.00442	-0.00373	-0.000117	0.0024
159.9	-0.00924	-0.000506	0.000679	-0.000885	-0.00675	0.000684	0.00407	-0.000168		159.9	-0.00327	0.000706	-0.00306	0.00584	-0.00383	-0.00195	0.000475	0.01248
160	-0.00509	-0.00702	-0.0011	-0.00266	-0.00735	-0.00228	0.00052	-0.00431		160	0.00562	0.00604	0.00109	0.00584	0.00032	0.0016	-0.0013	0.00537
160.1	-0.00687	-0.0011	0.00483	0.00504	0.000355	-0.00228	0.00348	-0.00313		160.1	-0.00445	-0.00463	-0.00246	-0.00482	0.0098	0.00753	-0.00545	-0.000557
160.2	-0.00983	-0.00228	0.00305	-0.00325	-0.00142	-0.00465	0.00111	0.00161		160.2	0.00562	-0.00463	0.00287	0.00228	0.01098	-0.00669	0.00344	-0.00174
160.3	-0.00746	-0.00288	0.00127	-0.000885	-0.01149	0.000684	0.0017	0.00161		160.3	0.0068	-0.00522	0.00109	0.0088	-0.00383	0.0022	0.00284	-0.00233
160.4	-0.00272	0.00127	-0.00169	0.00504	-0.0032	0.00305	0.00348	-0.00313		160.4	-0.00386	0.00367	0.0082	-0.00423	-0.000864	-0.000173	-0.00249	0.000628
160.5	-0.00924	-0.000506	0.000679	0.00978	0.00213	-0.000501	0.0023	0.00398		160.5	-0.00208	0.000706	-0.00483	-0.00246	0.00447	0.0016	0.00521	3.53e-05
160.6	-0.00331	0.00305	0.00364	-0.000885	-0.00261	-0.00228	0.00704	0.00398		160.6	-0.00327	0.00308	-0.00365	0.00643	-0.000272	0.01167	0.00699	-0.00115
160.7	-0.00509	0.00364	0.000679	0.00208	0.00272	-0.00642	0.00467	-0.00135		160.7	-0.00682	-0.00581	-0.00128	0.00584	-0.000272	0.00338	-0.00782	3.53e-05
160.8	-0.00983	0.00305	0.00542	-0.00148	0.00154	0.00246	0.00289	-0.00194		160.8	-0.00564	-0.000479	-0.00187	0.0088	-0.00738	0.00279	-0.00189	0.00833
160.9	-0.00568	-0.00702	0.00897	0.00563	-0.00498	-0.00524	0.00111	-0.00313		160.9	0.0068	0.00959	0.01057	0.00169	-0.000864	-0.00669	-0.00545	0.000628
161	-0.00272	-0.01058	8.7e-05	-0.00385	-0.00201	-0.00405	0.00052	0.00102		161	-0.00327	-0.00936	-0.00246	-0.00246	0.00684	0.00279	-0.00189	3.53e-05
161.1	-0.00805	8.64e-05	0.00838	0.00385	0.00213	-0.00109	-0.00185	0.00161		161.1	0.00266	-0.01529	-0.00246	0.0088	-0.0062	-0.00491	-0.00426	-0.00233
161.2	-0.00509	-0.000506	0.00483	0.00504	0.000948	0.00128	-7.27e-05	0.000425		161.2	-0.00327	-0.00107	-0.00187	0.00939	-0.000272	-0.00432	0.000475	-0.00707
161.3	0.00202	8.64e-05	0.0066	0.00267	-0.00142	-0.00642	-0.00303	-0.00846		161.3	0.00325	0.0013	-0.00128	-0.00482	0.00802	0.00397	0.00107	0.0024
161.4	-0.00568	0.00186	-0.00584	0.000892	-0.00083	-0.00405	0.00644	0.00398		161.4	0.00503	0.000113	-0.00306	0.00762	0.00032	-0.00373	0.00344	0.00122
161.5	-0.01161	-0.0011	8.7e-05	0.00978	-0.00794	-0.00465	0.00407	-0.00313		161.5	0.000288	-0.00107	0.00287	-0.00423	-0.00205	0.00753	-0.00486	-0.00233
161.6	0.00261	0.000679	0.00779	-0.000885	0.000355	0.00187	0.0023	-0.00668		161.6	-0.00919	-0.00522	-0.00661	-8.57e-05	0.0021	-0.00254	-0.0013	0.00774
161.7	-0.00509	0.00305	-0.00169	0.00385	-0.00557	-0.00405	0.00289	0.00161		161.7	-0.01748	-0.007	-0.00602	0.00347	-0.00383	0.00101	-0.00071	0.00596
161.8	-0.00213	-0.00821	-0.00998	0.00208	-0.00142	0.00187	0.00704	0.00576		161.8	0.000288	0.000706	0.00405	-8.57e-05	0.00921	-0.00728	-0.00782	-0.00885
161.9	-0.00864	-0.00406	0.01075	0.00563	0.000948	-0.00405	0.00052	-0.00194		161.9	-0.00682	0.000113	0.00405	-0.00127	-0.000864	0.0022	-0.00426	-0.00707
162	-0.00628	0.01016	0.000679	0.00148	-0.00083	-0.00465	-0.00126	-0.00194		162	-0.000304	0.00189	0.00346	0.000507	-0.00442	-0.00313	-0.00486	0.000628
162.1	-0.00331	-0.00347	8.7e-05	0.00208	0.00154	-0.00642	-0.00185	-0.000168		162.1	0.00207	0.00248	0.000499	0.00169	0.00684	-0.00491	-0.0013	0.00359
162.2	-0.00746	-0.0011	0.00127	0.000892	0.000948	0.00483	0.00585	0.00161		162.2	0.00147	-0.00463	0.00228	0.00702	-0.01093	0.00279	0.00877	-0.0047
162.3	-0.00331	0.00305	0.00305	0.00208	-0.00498	-0.00761	0.00348	-0.00431		162.3	-0.00327	0.00308	0.00405	-0.0066	0.00447	0.00753	0.00581	0.00418
162.4	-0.000944	0.00364	0.00483	0.00208	-0.00498	-0.00346	0.00111	-0.00135		162.4	0.00562	-0.00463	0.000499	0.00347	0.00684	-0.00136	-0.000117	-0.000557
162.5	0.00143	-0.00169	0.01075	0.000299	0.00213	-0.00583	0.01059	-0.00313		162.5	-0.00564	-0.00107	-0.000686	0.00643	0.00387	0.00457	-0.00486	-0.00707
162.6	-0.00924	0.00305	0.00127	-0.00148	-0.00379	-0.00346	-0.00185	-0.00313		162.6	0.00384	0.00959	-0.00483	0.00169	0.000913	0.0022	-0.00308	-0.0047
162.7	-0.00568	-0.000506	0.00423	0.00504	-0.00261	-0.00405	0.00467	0.000425		162.7	-0.00267	0.00189	-0.00187	-0.00186	0.00032	-0.00491	0.00699	-0.00115
162.8	-0.00568	0.00246	-0.0011	0.00859	0.000948	-0.00169	0.0023	0.0022		162.8	0.000288	-0.000479	0.00642	0.00702	0.00565	-0.00195	-0.00071	0.000628
162.9	-0.00391	0.00127	0.000679	0.00682	0.00391	-0.00642	-0.00244	-0.00076		162.9	-0.00445	0.00248	0.00168	0.00584	-0.00264	-0.0061	-0.00367	0.00359
163	0.000241	-0.00465	-0.00169	0.00445	-0.0032	-0.01116	0.0017	0.00339		163	0.00088	0.0013	-0.00898	-0.00364	0.00151	-0.00906	0.00462	0.00418
163.1	-0.00805	0.00305	8.7e-05	-0.00266	-0.0032	-0.01116	0.00585	0.000425		163.1	-0.000304	-0.01055	0.00405	-0.00423	0.00447	-0.00728	-0.00426	-0.0053
163.2	-0.00628	0.00542	-0.000505	0.00326	0.000355	-0.00228	0.00467	0.00161		163.2	-0.00682	-0.00403	-0.00306	0.00288	0.00624	0.00101	-0.00071	-0.00115
163.3	0.00439	8.64e-05	-0.00465	-0.00207	0.000948	-0.00702	0.0023	-0.00431		163.3	-0.00564	-0.00166	0.00524	0.0011	-0.000864	-0.00195	-0.00071	0.00537
163.4	-0.000352	0.00246	0.00186	0.000299	-0.00142	-0.00583	-0.000665	0.00279		163.4	0.00562	0.00367	0.00642	0.00821	-0.00323	0.00694	-0.00071	0.000628
163.5	0.0038	0.00246	0.00246	0.000299	0.00272	0.000684	-0.000665	0.00161		163.5	-0.00149	0.00781	-0.000686	0.00347	-0.00146	-0.00669	-0.00604	0.0024
163.6	-0.00568	0.00364	0.00305	-0.000885	0.000948	-0.00524	0.00348	-0.00194		163.6	0.000288	-0.0064	-0.00306	-0.00779	-0.00205	0.00042	-0.00249	-0.00293
163.7	-0.00687	0.00542	0.00364	0.00208	-0.00142	0.00128	0.00467	0.00457		163.7	-0.000304	-0.00463	0.00346	0.00584	0.00802	0.00101	-0.00367	-0.00767
163.8	-0.00628	0.00186	0.00246	0.00385	-0.00083	9.17e-05	0.00407	0.00339		163.8	-0.00445	0.00248	0.00168	-0.00186	0.00506	-0.00254	-0.00545	0.00359
163.9	-0.00154	0.00601	8.7e-05	0.00622	0.000355	-0.00583	0.00407	0.00872		163.9	0.00325	0.000706	-0.00187	-0.00482	-0.000272	-0.00491	0.00225	0.00774
164	-0.01161	0.00542	0.00127	-0.000293	0.00213	-0.00109	0.01118	0.000425		164	-0.00386	-0.00818	-0.00128	-0.000678	0.000913	-0.000765	0.00225	-0.00411
164.1	-0.00568	-0.00288	0.0066	-0.00148	-0.000237	-0.00702	0.00526	-0.00372		164.1	-0.0086	0.00308	0.00642	0.00406	-0.00738	0.00634	-0.00604	0.0024
164.2	-0.00331	-0.00465	-0.00287	0.00504	-0.00616	-0.00346	0.00348	-0.000168		164.2	-0.00564	0.00544	-0.00187	-0.000678	-0.00679	0.00338	-0.0013	-0.00411
164.3	-0.00331	8.64e-05	0.00127	0.00267	-0.000237	-0.00702	-0.00185	0.00576		164.3	-0.00149	0.00841	0.00583	-0.00364	0.00032	-0.00373	0.00107	0.00359
164.4	-0.000944	0.00127	0.0066	-0.00622	0.00213	0.00305	-0.00126	0.00339		164.4	0.00266	-0.00818	0.00583	-0.00482	0.00447	-0.00847	-0.00545	0.00418
164.5	-0.00509	0.00246	0.00246	0.00385	-0.00201	-0.00642	0.0023	-0.00194		164.5	-0.000897	-0.00403	-0.00128	-0.00423	-0.00975	-0.00491	-0.00663	0.00655
164.6	-0.0045	0.00127	-0.0011	-0.000293	-0.00853	-0.00465	0.00704	-0.000168		164.6	-0.01156	0.00248	0.000499	0.00406	-0.00205	0.00516	0.00166	0.00122
164.7	-0.01042	0.00601	-0.00524	0.000892	0.00391	0.00305	0.00111	-0.00194		164.7	-0.00149	-0.01292	0.00524	0.00525	-0.00205	-0.000173	-0.0013	0.000628
164.8	-0.00154	0.00364	0.0072	0.00504	0.000948	-0.00524	-0.000665	0.00516		164.8	0.00562	-0.00936	-0.000686	-0.00127	-0.00146	-0.000765	0.00581	-0.00944
164.9	-0.00509	0.00127	-0.000505	0.00148	-0.00142	-0.000501	0.00407	0.0022		164.9	-0.00564	0.00841	-0.00365	-0.00779	0.00506	0.00101	-0.00367	-0.00233
165	-0.000352	0.00305	-0.00228	0.00148	0.0045	-0.00524	0.00881	-0.000168		165	0.000288	-0.00403	0.00287	0.00821	0.01039	0.00397	-0.009	0.00596
165.1	-0.00391	0.00186	0.00127	-0.00799	0.00391	-0.00228	-0.00185	0.0022		165.1	-0.0086	0.0013	0.00879	-0.00305	-0.00264	-0.00136	-0.00308	0.0024
165.2	0.000241	-0.00228	-0.000505	0.00682	-0.00616	-0.00998	-7.27e-05	-0.00135		165.2	-0.00267	0.000113	-0.00187	0.00465	0.00151	-0.00491	-0.00071	-0.00411
165.3	0.000241	0.00423	0.00186	-0.000293	0.000355	0.00365	0.0017	-0.00076		165.3	0.00384	-0.00581	0.00168	0.00643	0.00032	-0.00136	-0.00545	-0.00767
165.4	-0.00509	0.00305	-0.00524	-0.000293	-0.00201	-0.00702	0.00407	0.00457		165.4	-0.00327	0.000113	0.00168	0.00288	-0.00205	0.00457	-0.0013	-0.00233
165.5	0.000833	0.00364	0.00305	0.00682	-0.00735	-0.000501	0.00289	0.00161		165.5	-0.00386	-0.007	0.000499	-0.00779	-0.00501	-0.0055	-0.00249	-0.00411
165.6	-0.00391	0.00127	0.000679	-0.00148	-0.00201	9.17e-05	-7.27e-05	-0.00431		165.6	-0.00267	0.000113	-0.00483	0.01117	-0.0056	0.00101	-0.00189	0.00596
165.7	-0.00805	-0.00228	8.7e-05	0.00267	-0.00201	-0.00287	0.00289	0.0022		165.7	0.00562	0.00248	-9.35e-05	-0.00246	0.00269	-0.0061	0.00403	0.00477
165.8	-0.00628	0.00127	0.000679	0.000892	-0.00201	-0.00346	-0.00303	0.0022		165.8	-0.01511	0.00308	0.01057	-0.00246	0.01158	-0.00491	-0.00782	0.00122
165.9	-0.00509	0.00483	8.7e-05	-0.00325	-0.0032	-0.00405	0.00348	0.00161		165.9	-0.000304	0.00604	-0.000686	-0.00305	0.00387	0.00338	-0.0013	-0.00826
166	-0.000944	-0.00761	0.00305	0.00385	0.000948	-0.00287	0.0017	0.00457		166	0.00266	-0.000479	0.00346	-0.00186	0.00387	-0.000765	0.00699	0.00655
166.1	-0.0045	-0.0011	0.00601	0.00326	0.00391	-0.00228	0.0023	0.0022		166.1	-0.000897	0.00544	-0.000686	-0.00186	-0.00738	-0.000765	0.00166	3.53e-05
166.2	0.000833	0.00127	-0.000505	0.00385	-0.0032	-0.00169	-0.00244	0.0022		166.2	-0.00623	0.00485	-0.00306	0.0088	-0.00501	-0.00136	-0.01078	-0.01004
166.3	-0.00628	0.00305	-0.00643	-0.00207	0.000355	0.000684	0.00052	0.00457		166.3	-0.00267	-0.00877	-9.35e-05	-0.00305	-0.00146	0.0016	-0.009	3.53e-05
166.4	0.0032	0.00364	-0.00524	-0.00148	0.000355	-0.00169	-0.000665	0.00161		166.4	-0.00564	0.00367	0.00701	-0.00364	-0.00738	-0.0055	0.00699	0.00537
166.5	0.00557	-0.00347	0.00601	0.000892	0.00154	-0.00405	-0.00244	0.00398		166.5	-0.00623	-0.00107	0.00524	0.00584	0.0021	0.00338	0.00284	-0.00233
166.6	-0.00509	-0.000506	8.7e-05	0.00148	-0.00083	0.000684	-0.000665	0.0022		166.6	-0.00149	-0.00226	0.00168	0.00584	0.00624	0.00457	-0.000117	-0.00233
166.7	0.000241	0.00423	0.00127	-0.00562	-0.00498	-0.00109	0.00526	0.00813		166.7	0.00147	0.00367	-0.00306	-0.00186	-0.00264	-0.00373	-0.00308	-0.0047
166.8	0.000833	0.00542	0.00186	0.00563	0.00213	-0.00287	0.0017	0.00161		166.8	-0.00741	-0.00581	-0.00128	-0.000678	0.00032	-0.00669	-0.00486	0.00655
166.9	0.0038	0.000679	-0.00406	0.00208	0.00391	0.00128	-0.00422	0.00161		166.9	0.00088	-0.00463	-0.00306	-0.00956	0.00743	0.00516	-0.00071	0.00714
167	-0.000352	0.00364	0.00186	0.00208	-0.00083	-0.00939	0.0017	-0.00431		167	-0.00267	0.00485	-0.00187	0.00169	0.00032	0.00101	0.00225	-0.0053
167.1	0.0038	-0.00347	8.7e-05	0.00385	-0.00498	0.000684	0.00348	-0.00076		167.1	0.000288	0.000113	0.00524	0.00228	-0.00205	-0.00195	0.00403	-0.00352
167.2	-0.00568	0.000679	-0.00228	-0.00503	-0.00794	-0.00169	0.00467	0.00576		167.2	-0.00504	-0.00581	-0.00365	-0.00127	0.00032	-0.000173	-0.00545	-0.0047
167.3	-0.00509	0.00719	-0.00465	-0.00503	-0.00083	-0.00642	-0.00422	-0.00076		167.3	-0.00327	0.01018	0.00642	-0.00364	0.00447	-0.00254	0.00344	0.00596
167.4	0.000833	-0.000506	0.00186	0.00563	0.00272	0.00483	0.00407	0.000425		167.4	0.00147	0.00841	-0.00424	0.0011	-0.00205	-0.0055	0.00403	-0.0053
167.5	0.00143	-0.000506	-0.0011	0.000892	-0.000237	-0.00287	0.00052	0.00339		167.5	-0.00327	-0.00581	0.00346	0.00288	0.0021	-0.00432	-0.00663	-0.00115
167.6	0.00261	0.00305	0.00246	-0.00385	-0.00201	9.17e-05	0.00111	-0.00076		167.6	0.00147	-0.00285	0.00465	-0.00482	0.00032	0.00516	-0.00604	-0.00589
167.7	-0.00568	-0.00228	-0.0011	0.00445	0.00391	9.17e-05	0.0023	0.00398		167.7	-0.01037	0.00308	0.00405	0.00465	-0.00205	0.00101	-0.00189	-0.00174
167.8	0.000833	0.00601	0.00601	0.000299	-0.00083	-0.00524	0.00467	0.00339		167.8	-0.00801	-0.00403	0.00346	-0.00542	0.00151	-0.00373	0.000475	0.0024
167.9	-0.00509	0.00246	-0.0088	-0.000885	-0.00498	-0.00109	0.01355	-0.00491		167.9	-0.00682	-0.00107	0.000499	-0.00305	0.00269	-0.000765	-0.00249	-0.00115
168	-0.00805	0.00364	-0.00287	-0.00266	-0.00083	-0.00109	-0.00422	0.00398		168	-0.00267	0.00604	-0.00542	0.00347	0.00447	-0.000173	0.00699	0.0024
168.1	-0.00568	0.00542	0.00483	-0.00207	0.00569	-0.00346	-0.000665	0.00457		168.1	-0.00149	0.00426	0.00287	-0.00127	0.00387	-0.00491	-0.00782	0.003
168.2	-0.00331	8.64e-05	-0.00287	0.00622	0.00213	-0.00169	0.00111	0.000425		168.2	-0.0086	-0.01055	-9.35e-05	0.000507	-0.00857	0.00101	-0.00545	-0.00885
168.3	0.0038	0.00246	8.7e-05	0.00385	0.000355	0.00187	0.00467	0.00457		168.3	-0.00445	-0.00107	0.00465	-0.00127	-0.00501	0.00457	0.00166	-0.00174
168.4	-0.00568	-0.00288	0.00423	0.00148	-0.00142	0.00365	0.00289	-0.00254		168.4	0.00266	-0.00463	-9.35e-05	0.00228	0.00387	0.00101	-0.00071	-0.00115
168.5	0.0038	0.00186	-0.00406	-0.00503	-0.00794	0.00365	0.00111	0.00635		168.5	-0.00564	-0.0147	-0.00779	0.0011	0.0021	-0.00787	0.0064	-0.0047
168.6	-0.00746	0.00186	-0.000505	-0.00859	0.00746	-0.00287	0.00052	0.00635		168.6	-0.00741	-0.00463	-0.00365	-0.00305	0.000913	0.00042	-0.00545	-0.00293
168.7	0.00143	-0.00524	-0.00287	-0.00385	0.00391	-0.00169	-0.000665	-0.00254		168.7	0.00266	-0.00166	0.00465	-0.000678	0.000913	0.00457	-0.00249	-0.00115
168.8	0.00261	0.00305	0.00305	-0.000293	-0.00438	-0.00405	0.00052	0.00398		168.8	-0.00564	0.00722	0.00642	-0.00482	0.00565	-0.000173	-0.000117	-0.00233
168.9	-0.000352	-0.00288	-0.00939	0.00208	-0.00142	0.000684	0.00052	-0.00194		168.9	-0.00623	-0.00107	-0.00424	0.00584	0.00032	-0.00491	-0.00249	-0.00233
169	-0.00568	0.00186	0.00364	-0.00385	-0.00616	-0.00287	-7.27e-05	0.00398		169	-0.000897	-0.00285	0.00109	-0.00186	0.00032	0.0022	-0.0013	0.0024
169.1	-0.000944	-0.00347	-0.00347	-0.00444	0.00509	-0.00405	0.00467	0.00279		169.1	-0.00564	0.00248	0.000499	-0.00127	-0.00205	-0.00491	-0.00249	-0.00707
169.2	0.00498	8.64e-05	-0.00465	-0.00325	-0.00142	-0.00169	0.00585	-0.00194		169.2	-0.00682	-0.00344	0.00465	0.0011	0.00684	-0.000765	0.00344	-0.01181
169.3	-0.00213	0.00305	0.00246	-0.00325	-0.00261	0.00246	-0.00244	0.000425		169.3	0.00384	0.00367	-0.00365	-0.00305	-0.000272	0.00516	-0.00367	-0.00648
169.4	-0.00746	-0.0011	-0.00347	-0.00681	0.00154	-0.00405	-0.000665	0.00398		169.4	-0.0086	-0.00581	-0.00128	-0.00719	-0.000864	-0.00254	0.00284	-0.00352
169.5	0.00202	0.0066	-0.00465	-0.00444	-0.000237	-0.00287	0.00111	0.0022		169.5	0.000288	0.00544	0.00879	0.00525	-0.00679	-0.00965	-0.00841	0.00418
169.6	-0.00391	0.00127	0.000679	-0.00859	0.00213	0.00957	-7.27e-05	0.00161		169.6	0.00088	-0.00107	0.00465	0.0011	-0.00501	0.0016	0.00758	0.00774
169.7	0.00261	-0.00465	0.00127	0.00267	-0.00083	-0.00287	-0.00244	-0.0055		169.7	-0.01334	0.00485	-0.00306	-0.00186	0.00506	0.00042	-0.00249	-0.000557
169.8	0.00202	0.00542	-0.0011	-0.00385	0.000948	0.00246	0.00111	0.00576		169.8	-0.000304	-0.00107	-0.00246	0.00288	-0.00264	0.00397	-0.000117	-0.01181
169.9	-0.00391	-0.0011	8.7e-05	-0.000293	-0.00142	-0.00405	-7.27e-05	0.00161		169.9	0.00207	-0.00107	0.00405	-0.0066	0.00565	-0.00313	0.00344	-0.0047
170	0.0038	-0.00821	-0.00702	0.00208	0.00213	0.00305	-0.00303	0.0022		170	-0.00504	0.00308	-0.00246	0.00465	-0.00975	0.00042	0.00225	-0.00293
170.1	-0.000944	-0.000506	0.00186	-0.00385	0.000355	0.00305	0.0023	-0.00076		170.1	-0.00386	0.00248	0.00346	-0.0066	0.00151	0.00101	-0.00367	0.0024
170.2	-0.000352	-0.0011	0.00246	0.00148	0.00391	0.00246	-0.00303	0.00161		170.2	0.00917	0.00308	-0.00424	-0.00127	-0.00738	-0.00136	0.00225	-0.00352
170.3	-0.000944	-0.00288	0.00186	0.00208	-0.00794	-0.000501	-0.00422	0.00457		170.3	-0.00208	-0.00463	-0.00306	0.00584	0.00151	-0.0055	0.00699	-0.000557
170.4	0.00498	0.00186	-0.00821	-0.00385	-0.00379	-0.00169	-0.00481	-0.00491		170.4	-0.00327	-0.00759	-9.35e-05	-0.00305	0.00684	-0.00313	-0.00545	-0.00233
170.5	0.000241	8.64e-05	-0.00347	-0.00622	-0.00083	0.00305	0.00111	0.00339		170.5	0.00266	-0.01055	-0.00187	-0.00542	0.00565	0.01049	-0.00189	-0.00648
170.6	-0.00331	-0.00643	0.00364	-0.00385	0.00569	-0.00169	-0.00363	-0.00135		170.6	-0.00386	0.00485	0.00465	0.00465	0.00565	0.00457	-0.000117	-0.00589
170.7	-0.00568	-0.0011	0.00127	-0.00207	-0.00261	-0.00346	-0.00422	0.00279		170.7	-0.00267	0.00248	0.00761	-0.00719	-0.000864	0.0022	-0.000117	0.00714
170.8	0.00261	0.00542	-0.00524	-0.00562	0.00213	-0.000501	0.00052	-0.00076		170.8	-0.00564	-0.00759	-0.00542	-0.00482	-0.00383	-0.00254	-0.000117	0.003
170.9	-0.00154	0.00246	-0.00643	0.000892	-0.00498	0.00779	0.0017	0.00398		170.9	-0.000304	-0.00936	0.00287	0.00169	-0.00323	-0.000173	-0.00782	-0.00233
171	-0.0045	0.00127	-0.00169	0.000299	0.000948	-0.00287	-7.27e-05	0.00931		171	0.00147	-0.00996	0.00642	0.00288	0.00802	-0.00313	0.0064	-0.00233
171.1	-0.00805	0.00542	-0.00287	-0.00148	-0.000237	-0.00346	0.0023	-0.00135		171.1	-0.00327	-0.01173	0.00228	-0.00838	-0.00323	-0.000765	-0.0013	-0.00707
171.2	0.00202	-0.00465	-0.00465	-0.000885	-0.000237	0.00246	-0.000665	-0.00194		171.2	-0.00564	-0.00522	-0.00187	-0.00423	0.00269	0.00457	-0.0013	0.00122
171.3	0.00261	0.00246	0.00364	-0.00622	0.000948	0.00365	0.00348	0.00279		171.3	-0.00208	0.000706	0.000499	-0.000678	-0.00264	-0.000765	-0.00249	-0.000557
171.4	0.00261	8.64e-05	-0.00169	-0.00148	-0.0032	0.00305	0.00289	0.00635		171.4	-0.000304	-0.000479	-0.000686	0.000507	-0.00264	0.0016	0.00284	-0.00174
171.5	-0.00628	-0.00643	0.000679	-0.00385	0.00272	0.00365	0.00289	-0.00313		171.5	-0.00682	0.000113	-0.00246	-0.01075	-0.000864	0.00575	0.00284	0.003
171.6	-0.00509	0.00364	-0.000505	0.00148	0.00332	-0.00702	0.00111	-0.00254		171.6	-0.00801	-0.01233	0.00642	-0.00956	0.00269	-0.0061	-0.00071	0.00537
171.7	-0.00983	-0.00347	0.00186	-0.00207	-0.00201	-0.00524	-0.00422	-0.00135		171.7	-0.00504	-0.00463	0.00701	-0.01193	-0.000864	0.0016	-0.00604	-0.00293
171.8	-0.00154	-0.00347	0.00305	-0.00148	-0.00142	0.00424	-0.00303	0.00516		171.8	-0.00149	-0.00759	-0.00602	0.00465	-0.00146	0.00457	-0.0013	-0.00233
171.9	-0.000944	-0.00288	-0.00761	-0.00325	-0.00142	0.00661	-0.00126	-0.00372		171.9	-0.0086	0.00426	-0.00187	-0.00186	-0.00323	-0.00373	-0.000117	-0.00293
172	-0.00331	-0.000506	-0.00584	-0.00266	-0.00142	0.00246	-0.000665	-0.00076		172	-0.00208	0.00189	-0.00424	-0.00246	0.000913	0.00338	0.00107	0.00714
172.1	0.00143	-0.0088	-0.00228	-0.00503	0.00391	9.17e-05	0.00111	0.00279		172.1	-0.01097	0.00485	-0.00365	-0.01075	-0.00501	0.00694	0.00107	0.000628
172.2	0.000833	0.000679	0.00423	-0.00266	-0.000237	0.00483	-0.00185	-0.00194		172.2	-0.0086	-0.00344	0.00287	0.00347	0.00269	-0.00373	-0.00723	3.53e-05
172.3	-0.00272	0.00423	-0.00228	0.00208	-0.00083	0.00128	-7.27e-05	0.000425		172.3	-0.01334	-0.00818	0.00287	-0.00956	0.0021	0.00397	0.00403	-0.00115
172.4	-0.000352	-0.00584	-0.000505	-0.00385	-0.00675	0.00128	-0.00422	0.00102		172.4	-0.00623	-0.00936	-0.000686	-0.000678	-0.000864	-0.00254	0.00225	0.00418
172.5	0.000833	-0.00406	-0.00465	-0.00207	0.00154	9.17e-05	-0.00244	-0.00135		172.5	-0.00267	-0.00107	0.00346	-0.00364	-0.000864	0.00279	0.00166	-0.00174
172.6	-0.000944	-0.00228	8.7e-05	-0.00799	0.00154	-0.00524	-7.27e-05	-0.000168		172.6	-0.00682	-0.00285	0.00642	-0.00364	0.00269	0.00101	-0.00249	0.00774
172.7	0.00439	-0.0088	-0.00169	-0.00148	-0.00142	0.00602	-0.00126	0.00161		172.7	-0.00623	-0.000479	0.00346	-0.00364	0.000913	0.0016	0.00521	-0.00826
172.8	-0.000352	-0.0011	-0.00524	-0.00148	-0.00261	-0.00642	-0.00244	0.00635		172.8	-0.0086	0.00367	0.00287	-0.00305	-0.01449	0.0022	-0.00189	-0.00352
172.9	0.000833	0.00364	-0.00584	-0.00562	-0.00083	-0.00109	-0.00244	-0.00135		172.9	0.000288	-0.01114	0.00879	-0.000678	0.00032	-0.0055	-0.00071	-0.00352
173	-0.00331	-0.00228	-0.00643	0.000299	-0.00083	0.01194	-0.00422	0.00339		173	-0.00327	-0.00936	0.00938	0.00288	-0.00205	-0.000173	0.00225	0.00418
173.1	0.00439	8.64e-05	-0.00702	-0.00385	-0.00201	-0.00405	-0.00303	-0.00609		173.1	0.00147	-0.00285	-0.00602	-0.01134	-0.00205	0.00634	0.00403	0.00122
173.2	0.000241	-0.00465	-0.0011	-0.0074	-0.00438	0.00246	0.00467	-0.00254		173.2	-0.000897	0.00544	0.00287	-0.000678	0.00506	-0.00373	0.00225	-0.00411
173.3	0.0109	-0.00584	0.00779	-0.000293	0.00213	0.00838	0.00289	-0.00135		173.3	-0.00919	0.00426	-0.00246	0.00406	-0.00264	0.00338	-0.00189	0.000628
173.4	0.0038	0.00246	-0.0088	-0.00503	0.000948	-0.00465	0.0017	0.00161		173.4	-0.00741	-0.00107	0.00346	0.00169	0.00624	0.0022	-0.000117	0.003
173.5	0.000241	-0.000506	0.00364	0.00267	-0.00201	0.00661	0.0023	-0.00491		173.5	-0.00564	-0.000479	0.000499	-0.00601	-0.00146	0.0022	0.00818	0.003
173.6	0.00143	-0.00643	0.00186	-0.00385	-0.00142	-0.00405	-7.27e-05	0.000425		173.6	-0.00504	-0.0064	-0.00187	-0.000678	-0.000864	0.00634	-0.00249	-0.00115
173.7	-0.00391	-0.00169	-0.00761	-0.00148	-0.00201	0.00187	-0.00422	-0.00076		173.7	0.00266	0.00426	-0.00424	-0.00482	-0.0062	0.00397	0.00521	-0.00944
173.8	0.000833	-0.00821	0.00305	-0.00148	-0.00142	0.00483	0.00289	0.00398		173.8	0.00207	0.00308	-0.00483	0.0011	0.000913	0.00042	0.00462	-0.00885
173.9	-0.00509	8.64e-05	-0.00228	-0.000293	-0.00735	-0.00642	0.00348	-0.00431		173.9	-0.000304	-0.00107	-0.00128	0.000507	0.00447	0.00101	0.00166	0.000628
174	0.00439	-0.00584	-0.00643	0.00148	-0.00261	0.00365	-0.00481	-0.00076		174	0.00088	-0.000479	-0.00187	-0.01312	0.00387	-0.000765	-0.01433	0.00596
174.1	-0.000944	-0.0011	0.000679	-0.00444	-0.00557	-0.00169	-0.00422	-0.00076		174.1	0.00266	-0.00403	-0.00246	0.0011	-0.0056	0.0016	0.00403	-0.00174
174.2	0.00616	0.00364	0.000679	-0.00266	-0.00083	-0.00465	-0.00481	-0.00846		174.2	-0.00564	-0.00226	0.00761	-0.00127	-0.000272	-0.00254	0.00344	0.00477
174.3	-0.00213	-0.000506	-0.00998	0.00208	0.00391	0.00838	0.0017	-0.00254		174.3	-0.0086	-0.00285	-0.00365	-0.00423	-0.00264	0.0016	0.00107	0.00655
174.4	0.000241	-0.00406	-0.000505	-0.00207	-0.01208	0.00246	-7.27e-05	-0.00076		174.4	-0.00623	0.00485	0.000499	0.0011	0.00565	0.00575	-0.00249	-0.00352
174.5	0.00616	8.64e-05	0.00364	0.000892	0.000948	-0.00228	-0.00185	-0.0055		174.5	0.0074	-0.00759	-0.01016	-0.00364	-0.00323	0.00279	0.00107	0.00537
174.6	-0.00509	0.00423	-0.00584	-0.00148	-0.00261	0.00305	-0.00363	-0.00372		174.6	-0.00682	0.0013	0.00346	-0.00127	-0.00205	-0.00669	0.00758	-0.000557
174.7	-0.00509	-0.00169	0.00246	0.000892	-0.00379	0.00187	0.00052	-0.00135		174.7	-0.00445	-0.000479	0.00168	0.00762	0.00151	-0.00373	0.00344	-0.00648
174.8	0.00143	-0.00347	-0.00287	0.00148	0.000948	0.00305	-0.0054	-0.000168		174.8	-0.01215	-0.00759	-0.00779	-0.000678	-0.000272	0.00694	0.00166	-0.00115
174.9	-0.00331	-0.00643	-0.0011	-0.000885	-0.00438	-0.00524	-0.00303	-0.00254		174.9	-0.00267	-0.0064	-0.00602	-0.00305	0.00151	0.0022	-0.000117	0.003
175	-0.0045	-0.0011	-0.00406	-0.00207	-0.0109	0.00246	-0.00126	-0.00668		175	-0.00386	0.000706	0.00465	-0.00186	-0.00916	0.00634	-0.00249	0.00596
175.1	-0.00805	-0.00643	0.00127	-0.00325	-0.00675	0.00602	-0.00244	0.0022		175.1	-0.00682	-0.00403	-0.00365	-0.00127	-0.00146	-0.00195	0.00166	-0.00115
175.2	-0.00213	8.64e-05	-0.00287	0.00445	-0.00735	0.00305	0.00348	-0.000168		175.2	-0.00741	0.00367	-0.00661	-8.57e-05	0.00151	0.00101	-0.000117	-0.00826
175.3	-0.00154	-0.0011	-0.00169	-0.00385	-0.00438	0.00305	0.00111	0.00398		175.3	0.00147	-0.00936	0.00109	0.00525	-0.00383	0.00457	0.00225	3.53e-05
175.4	-0.00568	-0.00584	-0.00347	-0.00799	0.00272	0.00187	0.0017	-0.00194		175.4	0.00325	-0.00759	-0.00187	-0.0066	0.00684	0.00338	0.0064	0.00181
175.5	-0.000352	-0.000506	-0.0011	-0.000885	-0.00142	-0.00287	-0.00126	-0.000168		175.5	0.000288	0.0013	-0.000686	-0.00246	0.00506	0.00812	0.00166	-0.0053
175.6	-0.00746	-0.00584	-0.00169	-0.00503	-0.00201	0.0072	-0.00244	-0.00431		175.6	-0.01097	-0.01173	0.00405	-0.000678	-0.000272	-0.0061	-0.00071	0.00418
175.7	0.000241	8.64e-05	8.7e-05	-0.00266	-0.00201	-0.00228	0.00111	0.0022		175.7	-0.00682	-0.00285	-0.00542	-0.000678	-0.00679	0.00634	0.00225	-0.000557
175.8	0.00439	-0.00761	-0.0011	-0.000293	-0.00261	9.17e-05	-0.00126	-0.00431		175.8	0.00207	0.00426	0.000499	0.00347	0.00921	0.00575	-0.000117	0.00122
175.9	0.000833	8.64e-05	0.00127	0.00563	0.000355	0.00542	-0.000665	0.00102		175.9	-0.00919	-0.00581	0.00405	-0.00246	0.00269	-0.000765	0.00166	0.0024
176	-0.000944	-0.00228	-0.00228	-0.00207	-0.00557	-0.00228	0.0017	-0.00668		176	0.00088	-0.00522	-0.000686	-0.00423	-0.00146	-0.00195	0.000475	-0.01181
176.1	-0.00628	-0.00939	-0.000505	-0.000885	-0.00201	0.00246	0.00348	0.00102		176.1	-0.00623	0.0013	0.00761	-0.00423	-0.00205	0.00457	-0.00071	0.000628
176.2	-0.000944	-0.00169	0.00364	-0.000885	-0.00142	0.00602	-0.006	-0.00372		176.2	0.00562	-0.00403	-0.00187	0.00347	-0.00738	0.00338	-0.000117	-0.00174
176.3	-0.00272	-0.00465	-0.00347	-0.00266	-0.00794	-0.00405	0.0023	-0.00313		176.3	-0.00741	-0.00522	-0.000686	-8.57e-05	0.0021	-0.00313	0.00344	0.00833
176.4	-0.00213	0.00364	-0.00465	0.00267	-0.00142	0.00305	0.00052	0.0022		176.4	0.000288	-0.00285	-0.00187	0.00169	0.00151	0.0022	0.000475	0.000628
176.5	-0.00272	-0.000506	-0.00287	-0.00148	-0.00616	0.00424	0.00052	-0.00728		176.5	-0.00978	-0.00166	-0.00602	-0.00364	-0.0056	0.00101	-0.000117	0.003
176.6	-0.0045	-0.000506	0.00127	-0.00148	-0.0032	0.000684	-0.000665	-0.00728		176.6	-0.00741	0.00841	0.00998	-0.00542	0.00387	0.00338	-0.00189	0.00122
176.7	-0.0045	-0.0011	0.00364	-0.00385	-0.00735	9.17e-05	-0.000665	-0.00194		176.7	-0.00327	-0.00403	-0.00602	-0.000678	0.00921	-0.00432	0.00225	-0.00707
176.8	0.00261	-0.00288	-0.00524	-0.00266	-0.00261	-0.00109	-0.00422	0.000425		176.8	-0.00208	-0.0064	-9.35e-05	0.00584	0.00506	-0.00669	-0.00486	0.00714
176.9	0.00143	-0.00584	-0.000505	-0.000293	-0.00261	-0.00287	-0.00303	-0.00254		176.9	-0.00741	-0.00226	0.00524	-0.00246	-0.00323	0.00279	-0.00071	0.00477
177	-0.00272	-0.00169	-0.000505	0.00148	-0.00498	0.00424	0.0017	0.00576		177	-0.00267	-0.00759	-9.35e-05	-0.00127	0.00032	0.00575	-0.00308	-0.00411
177.1	-0.00154	-0.00524	0.00305	0.00208	0.000355	0.00424	-0.000665	-0.00431		177.1	-0.01097	-0.00285	-0.00246	-0.00482	-0.00501	0.00042	0.00581	0.00655
177.2	-0.00154	8.64e-05	0.00246	-0.00681	-0.00142	-0.00228	-0.00185	-0.00194		177.2	-0.00682	-0.000479	-9.35e-05	-0.00127	0.000913	0.00634	0.00758	-0.00115
177.3	-0.00154	-0.00821	0.000679	0.000892	-0.00142	-0.00109	0.0017	0.0022		177.3	-0.000304	0.00367	-9.35e-05	-0.00364	0.00506	0.00575	-0.00308	-0.00233
177.4	-0.000944	-0.0011	0.00423	-0.00385	-0.0032	0.00128	-0.000665	-0.00194		177.4	-0.000897	-0.00285	0.00524	0.0011	0.00447	-0.00195	-0.00663	-0.00648
177.5	0.000241	0.00186	0.00246	-0.00148	-0.00261	0.00187	0.00467	-0.00431		177.5	-0.00801	0.00189	0.00287	0.00169	0.00151	-0.00373	-0.00189	-0.00352
177.6	-0.00509	0.00483	-0.00524	0.00504	-0.0032	0.00246	0.00407	-0.00076		177.6	0.00384	0.0013	-0.00306	-0.00601	0.0021	-0.00195	0.00284	0.00418
177.7	0.00261	-0.00347	8.7e-05	-0.00562	-0.00142	0.00187	-7.27e-05	-0.00194		177.7	-0.01334	-0.00226	-0.00424	0.01058	0.00269	0.00042	0.00284	0.000628
177.8	-0.00805	0.00423	0.00186	0.00208	-0.00379	-0.00169	-0.00126	-0.00313		177.8	-0.000897	-0.00403	0.00109	0.00406	-0.000272	0.0016	-0.00367	3.53e-05
177.9	0.000833	-0.00465	0.000679	-0.00444	-0.000237	0.00305	0.00052	-0.000168		177.9	0.00147	0.00189	-0.00898	-0.00364	0.00032	0.00397	0.00403	3.53e-05
178	0.00261	0.00246	0.00186	0.00445	-0.00735	-0.00109	-0.00363	0.00161		178	-0.000897	0.0013	-0.00602	-0.00542	0.00032	0.0022	-0.000117	0.00359
178.1	-0.00805	8.64e-05	0.00246	0.00148	-0.00201	9.17e-05	0.00585	0.00339		178.1	-0.00327	-0.00107	-0.00187	0.00643	0.00269	0.00397	0.00581	-0.00115
178.2	-0.00568	-0.00406	-0.00702	-0.00444	-0.00794	-0.000501	0.00052	-0.00431		178.2	-0.0086	0.000706	0.00583	0.00643	-0.000864	-0.00847	-0.00604	-0.00352
178.3	-0.00331	-0.00347	-0.000505	-0.00444	-0.00438	-0.00405	0.00052	-0.00965		178.3	-0.00267	0.00485	0.00346	-0.00897	-0.000864	-0.00432	-0.00545	0.000628
178.4	0.0032	-0.00643	-0.0011	0.00859	-0.00261	-0.00583	0.00052	0.00339		178.4	0.00621	-0.00522	-0.00187	-0.00364	0.0021	0.00397	-0.0013	0.00774
178.5	-0.000944	0.00364	0.00364	0.00741	-0.00675	-0.00109	0.00052	-0.00609		178.5	-0.000304	-0.0064	0.00109	-8.57e-05	0.00032	-0.000765	0.000475	-0.00293
178.6	-0.00924	-0.00347	0.000679	0.00267	-0.00201	-0.00109	0.0023	-0.00491		178.6	-0.00801	-0.00107	0.00168	-0.00542	0.01335	-0.00491	-0.0013	0.00122
178.7	-0.00391	0.00186	0.0066	-0.00148	-0.0032	9.17e-05	0.00407	0.00339		178.7	0.00147	-0.00107	-0.00187	0.00525	-0.00857	0.0016	-0.00486	3.53e-05
178.8	-0.00272	-0.00702	-0.00287	-0.00503	0.000355	0.00246	-0.00126	-0.00254		178.8	0.0074	0.00544	0.00583	-0.00127	0.0021	0.0016	0.00403	-0.0047
178.9	0.0038	-0.00288	0.00838	0.000892	0.00154	-0.000501	0.00467	-0.00076		178.9	-0.00623	-0.01884	-0.00306	-0.0066	-0.00383	0.00457	-0.0013	-0.00174
179	-0.0045	0.00364	-0.0011	0.00445	-0.00498	0.000684	-0.00303	-0.00728		179	-0.000304	-0.00226	-0.000686	0.00584	0.000913	-0.00254	-0.000117	-0.00352
179.1	-0.00628	-0.0011	0.00127	0.000892	-0.00379	-0.000501	-0.00303	0.0022		179.1	-0.00149	0.00308	0.00524	-0.00482	-0.000864	0.00279	-0.00308	0.00359
179.2	-0.00924	-0.00821	0.00779	0.000892	-0.00201	9.17e-05	0.00585	-0.000168		179.2	-0.00741	0.00308	0.00465	-0.00601	0.00032	-0.000765	0.00462	0.00477
179.3	-0.000352	0.00779	0.000679	-0.00266	-0.00379	0.00187	-0.00303	0.0022		179.3	0.00325	-0.00581	-0.00187	0.0011	-0.00323	-0.00432	0.00344	0.00418
179.4	-0.00983	-0.00169	0.00186	-0.00325	-0.00735	0.00246	-0.00185	-0.01024		179.4	0.0068	0.000706	0.00109	-8.57e-05	0.01631	0.00634	0.000475	0.00359
179.5	-0.00746	-0.00169	0.00246	0.00445	-0.00379	-0.00465	-0.00422	0.000425		179.5	-0.01037	-0.00226	-9.35e-05	0.00643	0.00151	0.00694	-0.00367	0.00122
179.6	-0.00509	-0.000506	0.00305	0.00563	0.000355	-0.00169	0.0023	-0.00135		179.6	-0.00327	-0.00581	-0.00246	-0.000678	-0.00501	-0.00195	0.00284	-0.00826
179.7	-0.00628	0.00127	-0.00465	0.00148	-0.00379	-0.00228	-0.00422	-0.00431		179.7	0.000288	0.00841	-0.00424	0.000507	-0.00205	-0.00669	-0.000117	-0.00233
179.8	-0.000944	0.00186	0.00246	-0.000885	-0.00142	0.00661	-0.000665	-0.000168		179.8	0.00621	0.00189	-0.00187	0.000507	0.00743	0.00397	-0.01019	0.00477
179.9	-0.00687	-0.000506	-0.000505	0.00208	-0.00201	-0.00287	0.01	-0.00372		179.9	-0.00327	0.0013	0.01353	-8.57e-05	-0.00146	0.00101	-0.00071	3.53e-05
180	0.000241	-0.00702	0.00542	-0.000293	0.00332	9.17e-05	-0.000665	-0.00431		180	-0.00208	0.00959	0.00287	0.00406	0.00032	-0.000765	0.000475	0.00359
180.1	-0.00391	-0.00169	0.00186	0.000299	-0.00557	-0.00109	0.0017	0.00279		180.1	0.00384	-0.00463	-0.00839	-0.01312	0.00802	0.00457	-0.00426	0.00655
180.2	-0.00331	0.00305	-0.000505	0.00148	0.00154	0.00483	0.00052	-0.00135		180.2	-0.00741	-0.00463	-0.00306	0.00169	0.00447	0.00397	-0.00426	0.000628
180.3	0.00143	0.00305	-0.00584	0.00385	-0.00261	-0.00524	0.00348	-0.00372		180.3	-0.00208	-0.00403	0.00346	0.00406	-0.00857	0.0016	-0.00426	0.00359
180.4	0.000241	-0.00584	0.0066	-0.00325	0.00154	-0.00228	0.00526	0.00516		180.4	0.00384	0.00308	0.000499	-0.00246	0.01217	-0.00847	0.00521	0.00122
180.5	-0.0045	-0.00169	0.00364	-0.000293	-0.00438	0.00424	-0.00126	0.000425		180.5	0.00325	-0.00107	0.00701	-0.00423	0.000913	0.00101	-0.00308	-0.00174
180.6	-0.00391	0.00838	-0.00287	-0.00503	-0.00261	-0.00346	0.00052	-0.00668		180.6	-0.00149	0.00189	0.000499	0.00643	-0.000272	-0.00195	-0.00189	0.00596
180.7	-0.00272	0.00127	0.00423	0.00682	0.000355	-0.00524	0.0023	-0.00668		180.7	-0.00208	0.00485	0.00168	0.00288	0.00506	-0.00136	0.000475	0.00655
180.8	-0.00746	0.00246	-0.000505	0.00622	-0.00912	0.000684	0.00704	-0.00372		180.8	-0.00801	-0.000479	-0.00602	-0.00127	0.00032	0.0022	-0.00426	3.53e-05
180.9	0.000833	0.00542	0.0072	-0.00148	-0.000237	0.00305	-0.00185	-0.00194		180.9	-0.00208	0.01018	-0.00246	0.00228	-0.00264	-0.00432	-0.000117	0.00122
181	-0.0045	-0.00347	0.00364	-0.000885	-0.00142	-0.00465	0.00644	-0.000168		181	-0.00149	-0.000479	0.00465	-0.00246	0.00921	0.00457	0.00344	0.00537
181.1	-0.00272	-0.000506	8.7e-05	0.00445	0.00391	-0.00228	0.0017	-0.000168		181.1	0.00621	-0.00344	-9.35e-05	-0.00779	0.00032	-0.000765	-0.00367	-0.00233
181.2	-0.000352	0.00305	0.00186	-0.00385	0.0045	0.000684	-0.00363	0.0022		181.2	0.00325	-0.00285	0.00879	-8.57e-05	-0.00146	-0.00373	-0.000117	-0.00115
181.3	-0.0045	0.00246	0.00305	0.000299	-0.0032	-0.00583	0.0023	-0.00254		181.3	-0.00623	-0.00226	0.00228	0.0011	-0.00442	-0.00195	0.00107	-0.0047
181.4	-0.00331	8.64e-05	8.7e-05	0.008	-0.00261	0.00128	-0.00185	-0.00076		181.4	-0.00564	0.0013	-0.00246	-0.00246	0.00624	0.00516	0.0064	-0.00115
181.5	-0.00509	0.00601	0.000679	-0.00799	-0.00261	-0.000501	0.00644	0.00457		181.5	-0.00208	-0.00463	0.00168	0.00821	0.0021	-0.00787	-0.00071	-0.00885
181.6	-0.00331	0.00246	0.00542	0.000892	-0.00794	-0.00524	0.00348	-0.0055		181.6	-0.00267	0.00367	-0.00128	-0.000678	-0.00857	-0.00491	-0.0013	-0.00174
181.7	-0.000944	0.00305	0.00364	0.00504	0.00154	-0.00405	0.00644	0.00339		181.7	-0.00386	-0.00226	0.00346	0.00465	-0.00264	-0.0055	-0.01078	0.003
181.8	0.000833	-0.000506	-0.00169	-0.00148	0.00332	-0.00109	-0.00363	-0.000168		181.8	-0.00208	0.000113	0.00168	0.00288	0.00802	0.0022	-0.00604	0.000628
181.9	-0.000352	0.00127	0.00305	-0.000885	-0.00261	-0.00228	0.0023	-0.00372		181.9	0.00147	0.00485	-0.00246	-0.00186	0.00151	0.00457	-0.00189	-0.00411
182	-0.000352	0.00186	0.00601	0.00563	-0.0032	-0.00583	0.00467	0.00457		182	-0.000304	0.00367	-0.00661	-0.00305	-0.000864	-0.00254	-0.00249	-0.000557
182.1	-0.000352	0.00246	0.00956	0.00148	-0.00083	-0.00405	-0.00363	-0.000168		182.1	-0.00267	-0.00463	-0.00246	-0.00127	0.00684	0.00101	-0.00723	0.00537
182.2	-0.00272	0.00483	-0.00287	-0.000885	-0.00201	-0.000501	-0.00244	0.00161		182.2	-0.000897	0.00367	0.01057	0.000507	-0.00383	-0.00313	0.00284	0.0024
182.3	0.000241	-0.000506	0.00127	-0.000885	-0.00142	9.17e-05	0.00111	-0.00372		182.3	0.00621	0.0013	-0.000686	0.00169	-0.000272	-0.00313	-0.00249	0.00892
182.4	-0.000944	0.00305	-0.00287	-0.00148	-0.00557	-0.00346	0.01	-0.00609		182.4	-0.00564	-0.00285	0.00228	-0.00246	0.00032	-0.00491	0.00107	-0.00115
182.5	-0.000944	8.64e-05	0.00897	-0.00148	-0.00912	-0.00169	0.00348	0.00516		182.5	-0.00267	0.00781	-0.000686	0.00465	0.00447	-0.000765	-0.00071	-0.00648
182.6	-0.00568	0.00542	0.00483	-0.00266	0.00509	-0.00465	-0.000665	-0.00194		182.6	0.0074	0.00544	0.00524	-0.00186	-0.00205	0.0016	-0.00426	0.00181
182.7	-0.00391	0.00601	0.00186	0.00504	0.00154	-0.00228	0.00526	-0.00194		182.7	0.00917	-0.00344	0.00642	0.00702	0.00565	0.0099	0.000475	0.00892
182.8	0.000833	-0.00347	0.00305	0.00445	-0.00142	0.000684	0.00052	0.00102		182.8	-0.00445	0.00189	0.00168	-0.00186	0.00565	0.0022	0.000475	3.53e-05
182.9	-0.00272	0.00127	0.000679	0.000299	-0.00438	-0.00346	0.00052	0.00161		182.9	0.00384	-0.00107	-0.00187	-0.00423	-0.000864	-0.00728	0.00107	0.0024
183	-0.00864	0.00186	-0.00524	-0.00562	-0.00142	9.17e-05	0.00111	-0.00194		183	0.0074	-0.00226	0.00346	0.0011	0.00624	-0.00373	-0.00189	-0.00352
183.1	0.000241	0.00305	8.7e-05	0.00504	-0.00142	-0.000501	0.00407	0.00813		183.1	-0.00327	0.000113	-0.00187	0.00525	-0.00383	-0.00254	-0.00308	-0.00589
183.2	-0.00568	8.64e-05	0.00305	0.00208	0.00213	-0.00939	-7.27e-05	0.000425		183.2	-0.000897	0.00308	0.00642	-0.00779	0.0098	-0.00195	-0.00426	0.00122
183.3	-0.00805	-0.00347	0.01016	-0.00207	-0.00438	-0.01176	0.00526	0.000425		183.3	-0.000304	-0.000479	0.00761	-0.000678	0.000913	0.00457	0.00699	-0.00411
183.4	-0.00924	-0.0011	0.00423	-0.00503	-0.0032	-0.00169	0.00585	-0.00372		183.4	-0.00149	0.000113	-0.00542	-8.57e-05	0.000913	-0.00847	-0.00367	0.00477
183.5	-0.000944	0.00897	0.00186	0.00148	-0.00735	-0.00169	0.00111	0.00102		183.5	-0.00564	0.00604	0.00228	-8.57e-05	0.00387	-0.00313	-0.00189	0.0024
183.6	-0.0122	0.00483	-0.000505	-0.000293	-0.000237	-0.00287	-0.00126	0.00339		183.6	0.00207	0.000706	-0.00246	-0.000678	0.01276	0.00042	-0.00486	-0.00944
183.7	-0.00272	-0.00288	0.00423	-0.000293	-0.00261	9.17e-05	0.0017	0.00279		183.7	-0.00327	0.0013	0.00109	0.00525	-0.00146	0.00516	0.00403	0.00655
183.8	-0.00983	0.00483	8.7e-05	0.00148	-0.00083	0.00246	0.00348	0.000425		183.8	-0.00327	0.0013	0.0082	-0.00838	0.00151	-0.00906	-0.00426	0.00418
183.9	-0.00805	-0.000506	-0.00228	-0.00207	-0.00201	-0.00879	0.00585	-0.00254		183.9	0.00147	0.01078	-0.00187	0.0011	0.00624	0.00101	-0.00308	-0.00115
184	-0.00391	0.00838	0.00127	-0.00148	-0.00261	-0.000501	0.00348	-0.000168		184	-0.000897	-0.00107	0.00287	0.00347	0.00684	-0.00254	-0.00189	0.0024
184.1	-0.000352	8.64e-05	0.00127	0.000299	-0.00379	0.00424	-0.00244	0.00457		184.1	0.00207	-0.00936	-0.00779	-0.000678	-0.00501	-0.00136	0.00403	-0.00233
184.2	-0.01042	-0.00347	0.00364	0.000892	0.000948	-0.00109	0.00111	-0.00135		184.2	0.0068	-0.00285	0.00524	-0.000678	-0.000272	-0.00254	0.00166	0.000628
184.3	-0.00864	0.00483	-0.00465	0.00326	-0.00083	-0.01353	0.0017	-0.00313		184.3	-0.01097	-0.00107	0.00346	0.0011	-0.00501	0.00279	-0.00249	0.00181
184.4	-0.00687	0.00186	0.0072	0.00326	-0.0032	9.17e-05	-7.27e-05	0.00516		184.4	-0.00208	0.00485	0.00287	0.00288	-0.000272	-0.000765	-0.00249	-0.00293
184.5	-0.0045	8.64e-05	0.00423	-0.00207	0.00865	-0.00405	-0.000665	0.00102		184.5	-0.00267	-0.00107	-9.35e-05	-0.00127	0.000913	0.00042	-0.00367	0.00714
184.6	-0.00687	-0.00406	0.0066	-0.00503	-0.00438	-0.00346	0.00822	-0.00135		184.6	-0.00386	-0.00463	-0.00128	0.00762	0.01217	-0.00195	-0.00486	-0.0047
184.7	-0.00746	-0.0011	-0.00287	0.000299	-0.00379	-0.00109	0.00526	0.00279		184.7	-0.00504	-0.0064	0.000499	0.000507	-0.00501	-0.00728	0.00166	-0.00352
184.8	-0.000944	0.00423	0.00305	0.00208	0.00272	0.00128	-7.27e-05	-0.00313		184.8	0.000288	-0.00877	-9.35e-05	-0.00719	-0.000864	0.0022	0.00225	0.000628
184.9	-0.00805	0.00186	-0.0011	-0.00503	0.00154	-0.00642	-0.00244	0.00398		184.9	-0.00564	0.00663	0.00109	0.00939	0.01039	0.00338	0.00225	0.000628
185	-0.0045	0.00364	0.01075	-0.00444	0.00272	-0.00405	0.01237	-0.00372		185	-0.00978	0.0013	0.000499	0.0088	0.01335	0.0022	-0.00071	0.00359
185.1	-0.00509	0.00364	0.00186	-0.00148	0.00154	0.00246	-0.00185	0.00279		185.1	-0.00623	-0.00166	0.0082	-0.0066	-0.0056	-0.000173	-0.00604	0.00892
185.2	-0.0045	0.00542	0.00186	0.00504	-0.000237	-0.00405	-0.00126	-0.00254		185.2	0.00325	-0.00403	0.00642	-0.00601	-0.00146	-0.00847	-0.00663	0.000628
185.3	0.00202	0.00186	0.00186	0.00267	-0.00912	-0.00109	0.00111	0.000425		185.3	-0.00564	-0.00285	-0.00542	0.00288	0.00269	0.00279	-0.00604	0.00477
185.4	-0.00331	-0.0011	0.00423	-0.00325	0.00332	0.000684	0.00585	0.00457		185.4	-0.00386	-0.00463	0.00701	0.00762	-0.000272	0.00575	0.00166	0.00122
185.5	-0.00272	-0.00288	8.7e-05	-0.00503	-0.0032	-0.00169	0.00052	-0.00254		185.5	-0.00149	-0.000479	0.00761	-0.000678	0.00387	-0.00195	-0.00189	0.00359
185.6	-0.00509	-0.00406	0.00305	0.00208	-0.00201	-0.000501	-7.27e-05	0.00516		185.6	-0.00564	-0.007	0.0082	0.00347	0.00032	-0.00432	-0.00367	-0.00352
185.7	0.00202	0.00186	0.00186	0.00148	0.0045	0.000684	-0.00481	0.00102		185.7	-0.00327	-0.00107	-0.00424	-0.00186	0.000913	0.0022	0.00344	0.0024
185.8	-0.0045	0.00246	0.000679	0.00148	-0.000237	-0.00583	0.00467	0.000425		185.8	0.00799	-0.00226	-0.00306	-0.00482	0.00269	-0.000765	0.00758	-0.01122
185.9	0.000833	-0.00465	0.00305	0.01096	-0.00201	-0.00287	-0.000665	-0.000168		185.9	-0.00149	-0.00403	0.00583	-0.01016	-0.00383	-0.00136	-0.00367	-0.00115
186	0.00261	0.00364	0.00186	-0.00562	0.000948	-0.00405	-0.00244	-0.00135		186	0.000288	0.00189	0.00938	0.00643	0.00032	0.00397	-0.0013	0.00714
186.1	-0.000352	0.00186	-0.0011	-0.00148	-0.00379	-0.00109	0.00644	0.00161		186.1	0.00147	-0.000479	0.000499	-0.00482	0.00387	-0.00728	-0.00249	-0.00115
186.2	-0.00509	0.00246	0.00127	-0.00266	0.00154	0.00483	-7.27e-05	-0.00254		186.2	0.00088	0.00248	0.00346	-0.00127	0.00151	0.0022	0.00344	0.00181
186.3	-0.00746	0.00246	0.000679	-0.00325	0.00213	-0.00405	-0.00185	0.00872		186.3	-0.00386	0.000113	0.00168	-0.00305	-0.00323	0.00279	-0.00071	-0.00352
186.4	0.00143	-0.000506	-0.00406	0.00504	-0.00616	-0.00583	0.00704	0.00161		186.4	-0.000304	0.00248	-0.01016	0.00643	0.00387	-0.0138	-0.009	-0.00293
186.5	0.00498	0.00246	0.00246	0.00267	0.00154	-0.0082	0.00348	-0.000168		186.5	-0.00208	0.00604	0.00524	-0.00364	-0.01034	0.0016	-0.00723	0.00537
186.6	0.000833	0.00601	0.000679	-0.00266	-0.00083	-0.00346	-7.27e-05	0.00516		186.6	0.00088	-0.00107	0.00524	-0.00779	0.00032	-0.00136	0.00284	0.003
186.7	0.00143	0.00305	0.000679	0.00267	-0.0032	-0.00169	-0.000665	0.00516		186.7	-0.000897	-0.00581	0.00465	-0.00601	0.01098	0.00338	-0.00367	0.003
186.8	0.00439	8.64e-05	0.000679	0.00208	0.00391	0.00128	0.0017	-0.00076		186.8	-0.00623	-0.00226	0.000499	0.00584	-0.00146	0.0016	0.00225	-0.00115
186.9	0.0032	0.00423	0.0066	-0.00148	-0.00438	9.17e-05	-0.00303	-0.00076		186.9	-0.00504	0.00544	-9.35e-05	0.00465	-0.00975	-0.0061	0.00284	0.003
187	-0.00331	0.00305	-0.00761	-0.00444	-0.00083	-0.0082	0.0023	0.00161		187	0.00147	0.000706	0.00405	-0.00186	-0.00146	-0.000765	-0.00071	0.00122
187.1	-0.00331	-0.00169	8.7e-05	0.00267	-0.00379	-0.00109	0.00111	0.0022		187.1	0.00088	0.00367	0.00109	-0.01134	-0.000272	0.00457	-0.00189	-0.00352
187.2	-0.00864	-0.00169	0.00186	-0.00444	0.0045	0.00602	0.0023	0.0022		187.2	0.000288	-0.00344	-0.00246	0.00465	-0.00857	0.00101	0.000475	0.00122
187.3	-0.00331	-0.0011	0.000679	0.000299	-0.00498	-0.00642	-0.00185	0.00161		187.3	0.00088	0.00189	-9.35e-05	0.00288	0.00743	-0.0061	-0.00545	0.003
187.4	-0.00154	0.00601	0.000679	-0.000885	0.00154	0.000684	-0.00363	0.00635		187.4	0.000288	-0.00818	0.01531	-0.000678	0.00032	0.00457	-0.00249	0.0024
187.5	-0.00272	-0.0011	-0.00643	0.000299	0.00213	-0.00405	-0.00126	0.00279		187.5	0.00207	-0.00759	0.000499	-0.01312	-0.00442	-0.000173	-0.00367	-0.00944
187.6	0.000833	-0.00288	0.00127	0.000892	0.00391	-0.0082	-0.000665	-0.00076		187.6	-0.000897	0.00248	-0.00602	0.00406	-0.00797	0.00042	0.00818	-0.000557
187.7	-0.00331	0.00305	0.00423	0.000299	0.000355	-0.00702	-0.00126	0.00161		187.7	0.00207	0.00485	-0.000686	0.00762	0.00506	-0.00787	0.000475	0.003
187.8	0.000833	-0.0011	-0.00169	-0.00207	-0.00142	-0.00169	-0.000665	-0.000168		187.8	-0.00327	0.00189	0.00346	-0.01193	0.0021	0.00042	-0.00486	0.00181
187.9	-0.00628	-0.00347	-0.00228	-0.00325	-0.00261	0.000684	0.00526	0.00398		187.9	-0.00327	0.000706	0.00109	0.00465	0.00032	-0.00728	0.00758	-0.00707
188	0.00261	0.00542	-0.00465	-0.00385	0.00391	9.17e-05	0.00407	-0.00076		188	-0.00267	0.00544	0.00405	0.00347	0.00387	-0.00136	-0.000117	-0.00233
188.1	-0.000944	0.00246	-0.00287	-0.00207	0.000355	0.00305	0.00052	0.00813		188.1	0.00207	0.000706	0.00168	0.00762	-0.00205	-0.00728	0.00225	0.00774
188.2	0.00261	-0.00524	0.000679	-0.00266	-0.00142	-0.00583	-0.00363	0.00339		188.2	0.00443	0.000706	0.00465	0.00347	-0.00442	0.00397	0.00166	0.00181
188.3	0.00261	0.00127	0.00423	-0.000293	-0.0032	-0.00524	-0.000665	-0.00609		188.3	0.00207	-0.00463	-0.00424	-0.01193	-0.00205	-0.00491	-0.009	-0.00767
188.4	0.00202	0.00305	0.00186	-0.00207	0.00213	-0.00405	-0.000665	-0.0055		188.4	-0.00386	-0.00107	0.000499	0.00584	-0.00501	-0.0061	-0.00545	-0.00233
188.5	-0.00391	0.00127	-0.000505	-0.000885	-0.000237	0.00246	-0.006	-0.000168		188.5	-0.00445	0.01315	0.01057	-0.00246	0.00447	0.00101	0.00166	-0.000557
188.6	-0.00687	0.00246	0.00364	-0.00266	-0.00083	-0.00583	-0.00185	0.00279		188.6	-0.00504	-0.007	-9.35e-05	-0.00423	-0.000272	0.01049	-0.00071	0.003
188.7	-0.00391	0.00779	-0.00347	-0.000293	0.00213	0.00128	0.0023	0.00279		188.7	0.00325	0.0013	-0.00365	0.00169	-0.00501	0.00279	0.00818	-0.00233
188.8	-0.00154	0.00127	-0.00821	-0.00325	-0.00379	-0.00287	0.0017	0.00161		188.8	0.01095	0.000706	0.00701	0.00406	0.00032	0.00338	-0.00486	-0.0047
188.9	0.000241	-0.000506	0.00246	-0.000885	-0.00557	-0.00702	-0.00185	-0.000168		188.9	-0.00564	0.00485	-0.00128	-0.00186	-0.00146	-0.00195	0.00403	-0.00233
189	-0.00628	0.00127	-0.00465	-0.00562	0.00391	-0.00702	-7.27e-05	0.00339		189	-0.00445	-0.00285	-0.00306	-0.00186	0.00151	0.00457	-0.00249	0.00477
189.1	0.000833	0.00246	8.7e-05	-0.00385	-0.00261	-0.00228	0.00111	0.00813		189.1	-0.00564	0.00308	-0.00187	0.00347	-0.00146	-0.00669	0.00166	-0.00944
189.2	0.00498	0.00364	0.000679	-0.000293	0.00687	0.00661	-7.27e-05	0.000425		189.2	-0.000897	-0.00522	0.00168	-0.00246	-0.00264	-0.00373	0.00225	-0.01063
189.3	-0.00272	-0.000506	0.00305	-0.00385	-0.00142	-0.00287	-0.00955	-0.000168		189.3	-0.00682	0.00485	0.00168	-0.00246	0.00387	0.00338	0.00521	0.00537
189.4	-0.00687	0.00246	-0.00584	-0.00266	0.000948	9.17e-05	-0.00659	0.00813		189.4	-0.00741	0.000706	-0.00424	-0.00246	-0.00264	0.0022	-0.00545	-0.0053
189.5	-0.00864	-0.00524	0.000679	-0.00799	0.00272	-0.00465	-0.00126	-0.000168		189.5	-0.00682	0.00722	0.00287	-0.00364	0.00387	-0.0055	-0.00426	3.53e-05
189.6	-0.00391	0.00186	-0.000505	-0.00207	0.00154	-0.00228	-0.00185	0.000425		189.6	-0.00623	0.00426	0.00287	0.0088	-0.00857	-0.00373	0.00284	0.00537
189.7	-0.00864	0.00246	-0.00702	0.00148	0.000948	-0.00169	0.00052	0.0022		189.7	0.00147	-0.000479	0.00642	0.00762	-0.00146	0.00397	0.00344	0.0024
189.8	0.000833	-0.00288	0.00305	0.000299	-0.00142	0.00128	-0.00126	-0.0055		189.8	-0.00149	0.00485	-0.00128	-0.00542	-0.00205	0.0022	-0.00486	-0.00826
189.9	-0.00154	0.00186	0.00305	-0.00681	0.00687	-0.000501	0.00585	0.00516		189.9	0.00621	-0.00166	0.00287	-0.00838	-0.00679	-0.00195	0.00403	0.003
190	-0.00628	-0.00406	-0.0011	-0.000293	-0.00912	-0.00228	0.0017	0.00516		190	-0.000304	0.00604	0.00465	-0.00542	-0.00205	0.00101	-0.00486	-0.0053
190.1	0.00143	-0.00406	-0.00584	-0.00444	0.000948	9.17e-05	-0.00126	0.00279		190.1	-0.00267	0.00308	0.00287	-0.00542	0.00328	0.00101	0.00344	-0.00115
190.2	0.00202	0.00956	-0.00465	-0.000885	0.00272	0.00365	-7.27e-05	0.00339		190.2	-0.00741	-0.00522	0.00998	0.00288	0.00032	0.00101	-0.00189	3.53e-05
190.3	-0.00746	-0.00288	0.00838	0.00148	0.00628	-0.00465	-0.0054	0.0022		190.3	0.01036	-0.01292	-0.00187	-0.00186	-0.00146	-0.00847	-0.00071	-0.00589
190.4	-0.00746	-0.000506	-0.00524	-0.00207	0.000355	0.00424	-0.00481	0.00457		190.4	0.00384	0.00722	-0.00542	0.00406	0.000913	-0.00136	0.00462	0.0024
190.5	-0.0045	-0.00228	-0.0011	-0.000293	0.00391	0.00128	-0.000665	-0.00076		190.5	-0.00801	0.000706	-0.00365	-0.00364	-0.00205	0.00101	-0.00308	0.003
190.6	-0.00391	0.00364	0.00542	-0.00622	-0.00083	-0.00287	-0.000665	-0.00491		190.6	-0.00682	0.0013	0.00168	0.00169	-0.00205	-0.00432	-0.00426	0.0024
190.7	-0.00509	0.00483	-0.00228	0.000299	-0.00557	-0.00169	-0.00422	0.00516		190.7	-0.000897	0.00367	0.00524	-8.57e-05	0.000913	0.00516	0.01114	-0.00589
190.8	0.00202	0.00186	0.00305	0.00148	0.00154	-0.00346	-7.27e-05	-0.00076		190.8	-0.00919	0.00248	-0.00306	0.00465	-0.000864	0.00338	-0.00249	-0.00293
190.9	0.00439	-0.000506	-0.00406	-0.00859	-0.0032	-0.00228	-7.27e-05	-0.00254		190.9	0.00266	0.000706	0.00109	0.00584	-0.00383	-0.00669	0.00699	-0.000557
191	-0.000944	0.000679	-0.00761	-0.00325	-0.00438	-0.00405	0.00052	0.00339		191	-0.00445	-0.00344	0.00287	-0.00542	0.00032	0.00397	-0.00071	0.00359
191.1	-0.00924	0.00483	0.00483	0.000892	0.000948	9.17e-05	0.00348	0.0022		191.1	-0.00682	-0.00581	-0.00246	0.0011	-0.00501	0.00101	0.00403	-0.00115
191.2	0.0038	0.00246	-0.00228	-0.00266	-0.00201	0.00128	0.00111	-0.00313		191.2	-0.01393	0.00663	-0.00128	-0.00305	0.00565	-0.00373	-0.00782	-0.00233
191.3	-0.00568	0.00246	-0.00584	-0.000293	-0.00083	-0.000501	-7.27e-05	0.00516		191.3	-0.00327	0.00248	-0.00424	-0.0066	-0.000272	0.00931	0.00284	-0.0053
191.4	0.00439	-0.00821	-0.00169	-0.00977	0.00391	-0.00169	-0.00363	-0.00135		191.4	-0.000304	-0.00344	-9.35e-05	-0.00186	-0.00264	0.00457	-0.00308	0.00122
191.5	0.00143	-0.000506	-0.00287	-0.0074	-0.00557	0.00365	-0.00422	-0.0055		191.5	-0.00208	-0.00285	0.00761	0.00406	0.0021	-0.0061	0.000475	-0.000557
191.6	-0.00331	0.00186	-0.00228	0.000892	-0.00557	0.000684	-0.00185	-0.00135		191.6	-0.00504	-0.00344	0.00524	-0.00364	-0.00323	0.00871	0.00699	-0.00115
191.7	-0.000944	0.000679	-0.0011	-0.00681	0.000948	-0.00702	-0.00481	0.00279		191.7	-0.000304	-0.00226	0.000499	-0.00246	0.00032	0.00575	0.00166	-0.00707
191.8	-0.00331	0.00246	-0.00821	-0.00207	0.000355	0.00424	-0.000665	-0.00135		191.8	-0.00445	0.00781	0.00346	0.00288	-0.00679	0.00101	0.000475	-0.0053
191.9	0.00498	-0.00406	0.00364	0.00148	-0.00083	0.000684	-0.000665	0.0022		191.9	-0.01037	-0.00344	0.0082	-0.00127	0.00565	-0.00313	0.000475	0.00596
192	-0.00391	-0.00406	8.7e-05	-0.00444	-0.00142	-0.00109	0.00052	-0.00254		192	-0.00978	0.00248	-0.00306	0.00762	0.00328	0.00279	0.00521	-0.000557
192.1	0.00143	0.00246	8.7e-05	-0.00266	-0.00972	0.000684	0.00052	-0.00076		192.1	-0.00623	-0.0064	0.00228	0.00169	-0.00501	0.00516	0.00818	-0.00352
192.2	0.000241	0.00246	-0.00169	0.00445	-0.00498	-0.00346	-7.27e-05	0.00398		192.2	-0.00682	0.00485	-0.00542	-0.01371	0.00269	-0.00432	-0.0096	0.00122
192.3	0.000833	-0.000506	-0.0011	-0.00444	0.0045	-0.00287	-0.006	0.00102		192.3	-0.000897	-0.00463	0.00346	0.00406	0.00506	-0.00669	-0.00486	0.00359
192.4	0.0032	-0.00643	0.00246	-0.00148	-0.00616	0.000684	-7.27e-05	-0.00313		192.4	-0.01215	0.00781	-0.00898	0.00525	-0.00146	0.00397	0.00818	-0.00411
192.5	0.0038	-0.00169	-0.00287	-0.01036	-0.000237	-0.00405	-0.00363	-0.00135		192.5	-0.01097	0.00308	0.0082	-0.000678	-0.00264	-0.00254	0.00699	-0.00352
192.6	0.00261	0.00364	-0.00169	-0.00207	-0.00201	0.00424	-7.27e-05	0.00339		192.6	0.00147	-0.00522	-0.000686	-8.57e-05	-0.000864	0.00397	0.00462	-0.00115
192.7	-0.000352	-0.00288	-0.00465	0.00267	0.000948	0.000684	-0.00422	-0.00431		192.7	-0.01037	-0.00344	-0.00365	-0.00127	-0.0056	0.00694	0.00225	-0.00885
192.8	-0.00628	-0.00288	-0.0011	-0.01096	-0.0032	-0.00109	-0.00955	-0.00372		192.8	-0.00564	-0.00522	0.00109	-0.000678	0.000913	0.01227	-0.01019	0.00181
192.9	0.01031	0.00956	-0.00287	-0.00325	-0.00675	0.000684	-0.00718	0.00516		192.9	-0.00919	-0.00285	0.00287	-0.0066	-0.000864	-0.00373	0.000475	-0.00233
193	0.00202	8.64e-05	-0.00702	0.000299	-0.00201	0.00779	0.0023	0.00398		193	0.00266	0.00544	-0.00661	-0.00305	0.000913	-0.00313	-0.00367	-0.0047
193.1	-0.00805	8.64e-05	-0.00702	-0.00385	-0.00142	0.00305	0.00111	0.0022		193.1	0.000288	-0.00877	0.00228	0.00406	-0.00264	-0.00254	-0.000117	-0.00174
193.2	0.00676	-0.000506	0.000679	0.00385	-0.00083	-0.00109	0.0023	-0.00135		193.2	-0.01274	-0.00285	-0.00128	0.00347	0.00032	0.00397	0.00225	0.00418
193.3	0.000833	0.000679	-0.00643	-0.00207	0.000355	0.0072	-0.00244	-0.00194		193.3	-0.01156	0.00426	0.00465	-0.000678	-0.00146	0.00397	0.00403	-0.00115
193.4	0.00202	-0.00288	-0.0011	-0.00503	-0.00083	0.00305	-0.0054	0.0022		193.4	0.00088	0.000113	-0.00246	0.00169	0.00447	-0.00373	0.00403	-0.000557
193.5	-0.00509	0.00186	-0.00228	0.000299	-0.00675	-0.00642	0.00111	-0.000168		193.5	-0.01215	-0.00581	0.00465	-0.00482	-0.00738	0.00634	0.00225	0.00181
193.6	-0.00746	-0.000506	0.00186	-0.00859	-0.00379	0.00305	-0.00481	-0.00076		193.6	-0.00919	-0.00581	0.00168	-0.00186	-0.000272	0.00279	-0.0013	0.000628
193.7	0.00261	-0.00288	-0.0011	-0.00266	-0.00142	-0.00346	-0.00363	-0.000168		193.7	0.00207	-0.00226	-0.00602	0.0011	0.00506	0.00457	-0.00071	-0.00233
193.8	-0.00568	-0.00702	-0.00939	0.00208	-0.00142	0.00483	-0.0054	0.00339		193.8	-0.00801	-0.00818	-0.00602	-0.00127	0.00387	0.00812	-0.000117	-0.00648
193.9	0.000833	-0.00288	-0.00228	-0.000293	0.00391	0.00187	0.00348	-0.00372		193.9	0.00088	-0.0064	0.00583	0.000507	0.00506	0.00101	0.00107	-0.0124
194	0.000833	-0.00347	0.00127	-0.00148	-0.00557	0.00305	-7.27e-05	-0.00372		194	-0.00149	0.000706	-0.00128	0.00702	-0.0056	-0.00195	0.00344	0.00477
194.1	-0.00154	-0.00465	0.000679	-0.00148	0.000355	-0.00169	-0.00126	0.00102		194.1	-0.01334	0.00189	-0.00306	-0.00127	-0.0056	-0.0055	-0.0013	0.00655
194.2	-0.00687	0.00305	0.00246	-0.00503	-0.00912	-0.00287	0.0023	0.00161		194.2	-0.01097	-0.00877	-0.00424	-0.00186	-0.00323	-0.00313	0.00284	0.00359
194.3	-0.000352	-0.00702	-0.00406	-0.00918	-0.00201	0.00542	0.00407	-0.00076		194.3	0.00503	-0.00285	0.00465	-0.00601	-0.0056	0.00516	0.00462	0.00477
194.4	-0.00272	-0.000506	-0.00821	0.00148	-0.00142	-0.00405	-0.00718	-0.0055		194.4	-0.00267	-0.00226	-0.00483	0.00525	0.01039	-0.00669	0.00225	-0.00707
194.5	-0.00154	0.00423	-0.00228	-0.00207	0.00391	-0.00405	-0.01192	0.00102		194.5	-0.00504	-0.00522	0.00583	0.00406	-0.00205	0.00279	-0.00189	-0.00352
194.6	-0.000352	8.64e-05	-0.00821	0.00385	-0.00142	-0.000501	0.00348	-0.00194		194.6	-0.01037	-0.00522	-0.0155	-0.00956	-0.000864	-0.00195	-0.000117	0.003
194.7	0.0038	0.00186	-0.00287	0.00563	-0.00379	-0.00346	-0.0054	-0.00491		194.7	-0.000897	-0.00581	-0.00187	0.00584	-0.01093	-0.00313	0.00284	-0.00115
194.8	-0.00924	0.000679	-0.00228	-0.01333	-0.00142	0.00483	0.00348	-0.00609		194.8	0.00147	0.00308	0.00524	0.00406	-0.00264	-0.00432	0.00521	-0.00411
194.9	-0.00272	-0.00465	0.00483	-0.00799	-0.00142	0.00542	-0.00303	0.0022		194.9	-0.00741	-0.0064	-0.000686	0.00465	0.00269	0.00575	-0.00071	0.0024
195	-0.00509	-0.00584	-0.0011	-0.00207	-0.00261	-0.000501	-0.000665	-0.000168		195	-0.00208	-0.00226	0.00405	-0.00364	0.00269	-0.00432	0.00284	0.00477
195.1	-0.0045	-0.0011	-0.00702	0.00267	-0.00675	-0.00405	-0.00185	-0.00431		195.1	-0.000897	-0.00107	-9.35e-05	-0.00838	0.00328	0.00338	0.00166	-0.00174
195.2	-0.00391	-0.00169	-0.00761	-0.00148	0.000355	-0.00228	-0.00837	-0.00431		195.2	-0.00623	-0.00936	-0.00839	0.0011	-0.00323	0.00516	0.000475	-0.00589
195.3	-0.00687	-0.000506	0.00186	-0.00325	-0.00142	0.000684	-0.01014	-0.00076		195.3	-0.01097	-0.00344	-0.00187	0.00584	-0.00146	0.0099	0.00403	0.00537
195.4	0.000833	-0.00169	-0.00287	0.000892	-0.00853	0.00424	-0.00422	-0.00135		195.4	-0.00149	-0.00463	-0.00483	0.0011	0.00624	0.00042	0.00284	-0.000557
195.5	0.00794	-0.00761	-0.00524	0.000892	0.000355	0.00661	-7.27e-05	0.00339		195.5	0.00147	0.0013	-0.00187	0.0011	0.00387	-0.0061	-0.00841	0.0024
195.6	-0.00509	-0.00584	-0.00465	-0.00385	-0.00201	0.00246	0.0017	0.00161		195.6	-0.01334	-0.00226	0.00405	-0.00719	-0.00383	-0.00254	0.00284	0.000628
195.7	-0.00805	-0.00347	-0.00406	0.00148	-0.00142	-0.00405	0.00052	-0.00135		195.7	-0.00445	-0.00877	-0.00187	0.00643	-0.00146	0.00634	0.00284	-0.0047
195.8	0.00261	-0.00288	-0.00406	-0.000885	-0.00201	0.00661	0.00111	-0.000168		195.8	-0.00741	0.00189	0.00405	0.00406	-0.00501	0.0016	-0.00308	0.0024
195.9	-0.00983	8.64e-05	-0.00169	-0.00148	-0.00083	9.17e-05	0.0017	-0.00609		195.9	-0.00149	-0.00226	-0.00128	0.00584	-0.000272	0.00575	-0.00663	3.53e-05
196	-0.00272	-0.00288	0.00305	-0.00681	-0.00379	-0.00642	-0.00303	-0.00135		196	0.0068	-0.01173	-0.00246	0.0011	0.000913	-0.00195	0.00284	-0.00648
196.1	0.000833	-0.00406	-0.00287	-0.00325	-0.00912	0.00483	-0.00659	-0.00194		196.1	-0.00801	0.00367	-9.35e-05	-0.00601	0.000913	0.00634	0.00462	0.000628
196.2	-0.00331	0.00364	-0.00821	0.00148	-0.00557	0.000684	-0.00718	0.00161		196.2	-0.0086	-0.00403	-9.35e-05	0.00525	0.00624	0.00634	-0.00367	0.00537
196.3	-0.00509	-0.0011	0.00246	-0.00503	-0.00261	0.00128	-0.01014	-0.00431		196.3	-0.00741	-0.00226	0.00465	-0.00246	0.0021	-0.00491	-0.00189	0.00418
196.4	-0.00687	-0.00643	0.000679	-0.00444	-0.01268	0.000684	-0.00126	-0.00431		196.4	-0.00149	0.00485	-0.00779	-0.00246	-0.00797	-0.00847	0.00403	0.0024
196.5	-0.00331	-0.000506	0.00305	-0.000293	-0.0032	-0.000501	-0.00777	-0.0055		196.5	0.00266	0.00308	0.00405	-0.00186	-0.0056	0.01049	0.000475	-0.00115
196.6	-0.01042	-0.00524	-0.00169	0.000299	0.000355	0.00246	0.00111	-0.00313		196.6	-0.00327	-0.00344	-0.000686	-0.00186	0.01039	-0.000765	-0.00071	0.00418
196.7	-0.00687	-0.00169	0.00305	-0.00503	-0.00557	-0.00109	-0.00185	-0.00254		196.7	-0.01037	-0.000479	-9.35e-05	0.00465	-0.00146	-0.00313	0.00225	0.00418
196.8	-0.00924	-0.00406	-0.0011	-0.00207	0.00272	0.00661	-0.00422	-0.00372		196.8	-0.00682	-0.000479	0.00109	-0.00364	0.0021	0.00397	0.00107	-0.0053
196.9	-0.00864	-0.00406	-0.00228	-0.0074	-0.00201	-0.00405	0.00052	-0.00313		196.9	0.000288	0.00189	0.00109	0.00169	0.00684	-0.00195	-0.00308	3.53e-05
197	-0.00272	-0.00524	0.00601	0.000299	-0.00794	-0.00287	-0.000665	-0.00431		197	0.00266	0.0013	-0.00602	0.0011	0.00269	-0.000765	0.00284	0.00655
197.1	0.000833	-0.0011	-0.00287	0.000892	0.000355	0.00246	-0.00185	0.0022		197.1	-0.000304	-0.00226	0.00168	-0.0066	-0.000864	0.00101	0.00284	-0.00115
197.2	-0.00331	-0.00169	-0.00287	0.000892	-0.00853	0.00246	-0.00244	-0.00254		197.2	-0.00801	-0.007	0.00405	-0.00482	0.00151	0.00338	0.00107	0.00359
197.3	0.00202	-0.01235	-0.00287	-0.00444	-0.0032	-0.00109	-7.27e-05	0.00398		197.3	-0.01511	-0.00759	-0.00424	0.00228	0.00032	0.00397	-0.00486	0.00655
197.4	-0.0045	-0.00288	0.00246	0.00148	-0.00438	-0.00109	-0.000665	-0.00668		197.4	-0.00208	-0.00285	-0.00661	0.00525	0.00506	0.00279	0.00284	0.00359
[truncated: 10,525 more rows]
