# Supplementary material for: Functional implications of the exon 9 splice insert in GluK1 kainate receptors
Source: eLife. 2024 Nov 6;12:RP89755. doi: 10.7554/eLife.89755 (PMC11540303; doi:10.7554/eLife.89755)
Supplement: Figure 2—source data 1. [file elife-89755-fig2-data1.xlsx]

## Sheet: Figure 2
Figure 2A
GluK1-1a								GluK1-2a
10 mM Glu Desensitization (ms)	A1	Tau1	A2	Tau2	Mean-weighted ƮDes @ ≤100 ms			10 mM Glu Desensitization (ms)	A1	Tau1	A2	Tau2	Mean-weighted ƮDes @ ≤100 ms
Cell 1	-22.4464	-14.9984	-344.108	6.41232	5.10121			Cell 1	148.559	6.83512	-472.082	4.94156	4.07205
Cell 2	-27.0132	12.0694	-127.339	3.87096	5.30577			Cell 2	3.97425	8.4892	-134.896	3.54713	3.39711
Cell 3	-259.987	3.09683	68.4794	0.893014	3.88487			Cell 3	-389.049	5.13747	20.6405	1.00941	5.36875
Cell 5	-74.8116	16.8756	-149.084	1.83956	6.86364			Cell 4	8.96198	10.3397	-208.458	4.0929	3.81227
Cell 10	12.4674	8.99137	-86.1439	3.4759	2.54258			Cell 5	7.63405	-20.1908	-642.957	3.01711	3.29598
Cell 11	29.5567	5.30963	-77.4597	4.32902	3.72397			Cell 6	3.31539	27.5609	-671.702	3.35711	3.23705
Cell 12	-101.386	12.7399	-117.208	3.25451	7.65393			Cell 7	-960.101	2.92573	208.324	1.21849	3.39882
Cell 13	-3.01433	82.1056	-324.786	5.40114	6.10648			Cell 13	-38.0588	15.0972	-364.049	3.2584	4.37892
Cell 14	-77.7279	16.9706	-260.177	4.47846	7.35201			Cell 16	33.2402	6.18755	-415.221	2.65967	2.35267
Cell 16	16.5623	-30.7107	-786.265	3.02726	3.75323			Cell 18	-1782.94	1.87416	969.151	0.751165	3.21155
Cell 18	-33.3771	15.1036	-291.068	3.88752	5.04137			Cell 19	-2974.03	2.30697	471.223	0.812894	2.58827
				Mean	5.21173			Cell 20	-46.3117	53.129	-2563.56	2.64982	3.54557
				SEM	0.498636							Mean	3.55492
				N	11							SEM	0.230575
												N	12
Figure 2B
GluK1-1a								GluK1-2a
1 mM Kai Desensitization (%)	Peak current	Steady state current	% @ 1000 ms					1 mM Kai Desensitization (%)	Peak current	Steady state current	% @ 1000 ms
Cell 11	159.9	37.35	76.6417					Cell 8	641.1	31.88	95.0273
Cell 12	746.2	174.8	76.5746					Cell 9	670.5	46.02	93.1365
Cell 13	747.1	197	73.6314					Cell 11	481.9	41.88	91.3094
Cell 14	536.1	189.4	64.6708					Cell 16	312.3	14.75	95.277
Cell 15	478.3	149.2	68.8062					Cell 18	1650	98.36	94.0388
		Mean	72.0649					Cell 19	1466	118.2	91.9372
		SEM	2.33485					Cell 20	1427	123.1	91.3735
		N	5					Cell 21	1367	88.45	93.5296
										Mean	93.2037
										SEM	0.550551
										N	8
Figure 2C
GluK1-1a																GluK1-2a
Glutamate Dose Response			% Maximal current													Glutamate Dose Response
Log [M]	Concentration [M]	Concentration [µM]	Cell 2	Cell 3	Cell 4	Cell 5	Cell 6	Cell 7	Cell 8	Cell 9	Mean	SEM				Log [M]	Mean	SEM	N
-4	0.0001	100	10.559	10.0709	9.70874	19.5122	19.0722	17.1533	14.1631	17.1946	14.6792	1.45337				-5	0	0	4
-3.69897	0.0002	200	24.7205	19.4326	27.1845	25	30.6701	29.927	23.6052	33.9367	26.8096	1.62505				-4.699	2.9781	1.2857	12
-3.52288	0.0003	300	35.1553	33.4752	41.7476	39.6341	29.6392	0	38.6266	48.8688	33.3933	5.18917				-4.301	9.0293	4.0192	4
-3.39794	0.0004	400	44.472	40.9929	49.5146	54.2683	53.866	36.8613	43.7768	52.4887	47.0301	2.28375				-4.2218	15.034	2.2981	7
-3.30103	0.0005	500	64.0994	59.1489	57.2816	71.3415	66.2371	50.365	55.794	58.8235	60.3864	2.32672				-4	24.1456	4.961	9	EC50	187.7 ± 33 μM
-3.1549	0.0007	700	91.1801	72.766	75.7282	90.2439	102.062	67.1533	84.5494	100	85.4603	4.5009	N	8		-3.9208	31.8712	4.2826	7	Hill's slope	1.8
-3	0.001	1000	100	93.617	100	100	96.3918	100	90.9871	83.7104	95.5883	2.09011	EC50	379.3 ±52 μM		-3.699	45.6088	6.5801	3
-2.69897	0.002	2000	93.4161	100	78.6408	96.3415	100	95.6204	100	100	95.5024	2.57147	Hill's slope	2.1		-3.6576	57.6745	3.86	7
																-3.5229	66.7886	4.6954	4
																-3.4949	67.9456	3.8963	5
Figure 2D																-3.3979	83.3718	3.6952	3
GluK1-1a					GluK1-2a											-3.0969	106.498	10.0794	3
Kai efficacy	10 mM Glu	1 mM Kai	IK/IG		Kai efficacy	10 mM Glu	1 mM Kai	IK/IG								-3	104.127	7.5729	7
Cell 10	109.68	134.23	1.22383		Cell 5	653.64	521.14	0.797289								-2.8239	99.211	5.7811	7
Cell 11	77.29	154.96	2.00492		Cell 6	931.25	364.57	0.391485								-2.5229	100	0	13
Cell 12	425.19	735.71	1.73031		Cell 7	950.6	517.66	0.544561
Cell 13	496.85	738.11	1.48558		Cell 8	1302.4	633.37	0.48631
Cell 14	306.95	433.6	1.41261		Cell 9	1279.31	661.1	0.516763
Cell 15	244.84	475.35	1.94147		Cell 10	1009.1	467.03	0.462818
Cell 17	484.9	462.25	0.953289		Cell 11	1074.5	462.77	0.430684
Cell 18	278.25	361.89	1.30059		Cell 13	492.62	426.51	0.865799
		Mean	1.50657		Cell 15	430.78	311.36	0.722782
		SEM	0.128543		Cell 16	475.57	307.09	0.64573
		N	8		Cell 17	417.98	247.38	0.591846
					Cell 18	3154	1645	0.52156
					Cell 19	3109	1475	0.474429
					Cell 20	2887	1449	0.501905
					Cell 21	2927	1382	0.472156
							Mean	0.561741
							SEM	0.0356324
							N	15
Figure 2E
GluK1-1a						GluK1-2a
Rectification index	I -90 mV	I 90 mV	I 90 mV/I -90 mV			Rectification index	I -90 mV	I 90 mV	I 90 mV/I -90 mV
Cell 2	234.83	216.72	0.92288			Cell 2	190.5	179	0.939633
Cell 4	211.49	150.1	0.709726			Cell 3	409.4	398.98	0.974548
Cell 5	115.82	114	0.984286			Cell 5	679.85	356.24	0.523998
Cell 14	349.72	434.56	1.24259			Cell 6	754.3	520.65	0.690243
Cell 15	306.25	444.7	1.45208			Cell 10	1274.86	404.2	0.317054
Cell 16	986.7	628.91	0.637387			Cell 11	963.52	392	0.406842
Cell 17	754.5	574.74	0.76175			Cell 12	847.01	345.91	0.40839
		Mean	0.958672					Mean	0.608672
		SEM	0.112332					SEM	0.10037
		N	7					N	7
GluK1-1a	IV Plot										GluK1-2a	IV Plot
mV	Cell 2	Cell 4	Cell 5	Cell 14	Cell 15	Cell 16	Cell 17	Mean	SEM		mV	Cell 2	Cell 3	Cell 5	Cell 6	Cell 10	Cell 11	Cell 12	Mean	SEM
-90	-1	-1	-1	-1	-1	-1	-1	-1	0		-90	-1	-1	-1	-1	-1	-1	-1	-1	0
-80	-0.891539	-0.765899	-0.789674	-0.781883	-0.823837	-0.853856	-0.837773	-0.820637	0.0168264		-80	-0.832913	-0.887885	-0.845495	-0.90936	-0.87026	-0.845483	-0.807299	-0.856956	0.0130809
-70	-0.764677	-0.57719	-0.631843	-0.660814	-0.702367	-0.720908	-0.743804	-0.685943	0.025083		-70	-0.633333	-0.749218	-0.728823	-0.904759	-0.73754	-0.662768	-0.576876	-0.713331	0.0397417
-60	-0.532385	-0.562107	-0.517873	-0.582237	-0.587722	-0.55714	-0.635441	-0.567844	0.0146982		-60	-0.584252	-0.651026	-0.583849	-0.561909	-0.590551	-0.510503	-0.579238	-0.58019	0.0156953
-50	-0.429587	-0.432408	-0.416077	-0.48922	-0.494008	-0.447826	-0.473863	-0.454713	0.0117216		-50	-0.451129	-0.511847	-0.587041	-0.480498	-0.433797	-0.355976	-0.449129	-0.46706	0.0269935
-40	-0.268151	-0.340442	-0.290623	-0.320685	-0.403788	-0.3534	-0.354632	-0.333103	0.0169755		-40	-0.333701	-0.347435	-0.328896	-0.343855	-0.334601	-0.261551	-0.340397	-0.327205	0.0112024
-30	-0.100796	-0.272353	-0.215766	-0.23556	-0.276408	-0.200973	-0.241577	-0.220491	0.0224766		-30	-0.22378	-0.218832	-0.234552	-0.138791	-0.207913	-0.186109	-0.238747	-0.206961	0.013164
-20	-0.0227399	-0.152111	-0.156622	-0.140684	-0.15102	-0.111544	-0.134818	-0.12422	0.0178542		-20	-0.124147	-0.0971666	-0.136913	-0.0492244	-0.10398	-0.0792199	-0.143056	-0.104815	0.0126029
-10	-0.00894264	-0.0897915	-0.0824555	-0.0549297	-0.0685388	-0.0370427	-0.0564745	-0.0568822	0.0104297		-10	-0.0708661	-0.0429897	-0.0598073	-0.0183481	-0.0391808	-0.0374045	-0.0695387	-0.0483051	0.00727016
0	-0.0290423	-0.0343751	-0.0646693	-0.048616	-0.0610612	-0.0138968	-0.0146322	-0.0380419	0.0078318		0	0.0530709	0.0362091	0.0236081	0.0392417	-0.00626735	0.0107626	-0.0290433	0.018226	0.0107992
10	0.0443299	0.0384888	0.0750302	0.0860403	0.0987429	0.0327252	0.0399072	0.0593235	0.0100685		10	0.0714436	0.0763801	0.0330514	0.0520483	0.0149742	0.0190136	0.0200706	0.0409974	0.00971326
20	0.0554444	0.066859	0.0988603	0.136366	0.166792	0.036313	0.055719	0.0880505	0.0181828		20	0.0787402	0.0907426	0.0346253	0.0561845	0.0227319	0.0387226	0.0376619	0.0513441	0.0094754
30	0.0754163	0.13769	0.113452	0.198044	0.255967	0.0448262	0.0674354	0.127547	0.0288415		30	0.0954331	0.109599	0.037773	0.0713244	0.0207866	0.0249917	0.0522308	0.058877	0.01305
40	0.144019	0.15996	0.198584	0.301927	0.329078	0.0685821	0.105368	0.186788	0.0367726		40	0.160577	0.155423	0.0661028	0.0943922	0.0237908	0.040352	0.0672601	0.0868426	0.0202058
50	0.226121	0.312639	0.187014	0.464429	0.4832	0.110753	0.160159	0.277759	0.055825		50	0.196955	0.243747	0.0944179	0.121437	0.0364667	0.0504608	0.0930213	0.119501	0.0286321
60	0.390112	0.312781	0.299171	0.543349	0.780669	0.187524	0.265036	0.396949	0.0766292		60	0.364042	0.382877	0.159064	0.248668	0.0547433	0.0830912	0.120211	0.201814	0.0501209
70	0.532428	0.539458	0.392506	0.779767	0.895412	0.27296	0.37666	0.541313	0.0850205		70	0.466509	0.541011	0.249202	0.361965	0.109706	0.173022	0.200104	0.300217	0.0606602
80	0.72759	0.764906	0.596097	1.00114	1.19131	0.424476	0.580517	0.755149	0.099612		80	0.775853	0.760039	0.351504	0.501259	0.185667	0.263617	0.279831	0.445396	0.0910328
90	0.92288	0.709726	0.984286	1.24259	1.45208	0.637387	0.76175	0.958672	0.112332		90	0.939633	0.974548	0.523998	0.690243	0.317054	0.406842	0.40839	0.608672	0.10037
Raw trace figures
Figure 2A				Figure 2B				Figure 2C	GluK1-1a									GluK1-2a
Time (s)	GluK1-1a	GluK1-2a		Time (s)	GluK1-1A	GluK1-2A		Time (ms)	0.1 mM G	0.2 mM G	0.3 mM G	0.4 mM G	0.5 mM G	0.7 mM G	1 mM G	2 mM G		Time (s)	0.01 mM G	0.1 mM G	0.25 mM G	0.5 mM G	0.7 mM G	1.5 mM G	3 mM G
0	0.486492	0.440249		0	-3.73657	-16.1918		0	-0.01473	-0.00869	-0.00378	-0.00642	-0.00227	-0.00642	-0.00302	-0.00642		0	-7.78452	-7.78452	-7.47313	-43.5933	-13.078	-13.7007	-7.16175
0.100006	0.490378	0.369823		0.1	-2.49104	-14.6349		0.1	-0.00642	-0.00604	-0.0034	-0.00718	-0.00227	-0.00453	-0.0034	-0.00453		0.1	-8.71866	-4.04795	-6.85037	-37.9884	-17.1259	-15.569	-6.85037
0.200012	0.49815	0.361998		0.2	-18.6828	-9.6528		0.2	-0.00982	-0.00642	-0.0034	-0.00642	-0.00227	-0.00642	-0.00264	-0.00793		0.2	-8.71866	-4.04795	-7.78452	-41.4136	-10.2756	-15.2577	-9.03004
0.300018	0.490378	0.363954		0.3	-8.0959	-11.5211		0.3	-0.01095	-0.00604	-0.000755	-0.00604	-0.00378	-0.00529	-0.00264	-0.00529		0.3	-9.34142	-9.34142	-4.35933	-42.3478	-11.2097	-14.3235	-3.11381
0.399994	0.486492	0.365911		0.4	-1.24552	-14.0121		0.4	-0.0068	-0.00869	-0.00415	-0.00302	-0.00151	-0.00453	-0.00189	-0.0068		0.4	-7.16175	-11.5211	-8.71866	-42.9705	-11.8325	-14.0121	-7.16175
0.5	0.455404	0.383517		0.5	2.49105	-14.3235		0.5	-0.00869	-0.0102	-0.00566	-0.00604	-0.00264	-0.00566	-0.00491	-0.00529		0.5	-5.60485	-6.22761	-8.40728	-40.1681	-13.3894	-16.1918	-9.96418
0.600006	0.486492	0.381561		0.6	-5.29347	-16.5032		0.6	-0.01208	-0.01171	-0.00566	-0.01095	-0.00227	-0.00415	-0.00378	-0.0034		0.6	-6.22761	-4.98209	-9.6528	-46.0843	-12.1438	-15.2577	-12.1438
0.700012	0.509808	0.375692		0.7	-7.47313	-12.4552		0.7	-0.00718	-0.00793	-0.0034	-0.00566	-0.000378	-0.0068	-0.00491	-0.00415		0.7	-8.71866	-9.34142	-7.78452	-48.5754	-18.0601	-23.0422	-14.3235
0.800018	0.509808	0.363954		0.8	-4.67071	-10.5869		0.8	-0.00982	-0.00831	-0.00491	-0.00566	0.000755	-0.00566	-0.000755	-0.0068		0.8	-8.40728	-12.1438	-10.8983	-58.5396	-18.3715	-26.7787	-22.4194
0.899994	0.486492	0.391342		0.9	-0.62276	-10.2756		0.9	-0.01246	-0.00755	-0.00453	-0.00566	-0.00415	-0.00378	-0.00264	-0.000755		0.9	-7.47313	-10.8983	-8.71866	-64.1444	-19.9284	-26.7787	-31.7608
1	0.467062	0.383517		1	-1.5569	-12.4552		1	-0.00831	-0.00755	-0.00227	-0.00529	-0.00227	-0.00453	-0.00302	-0.00831		1	-8.0959	-8.40728	-10.8983	-67.881	-27.4015	-31.4494	-40.1681
1.10001	0.533123	0.365911		1.1	-4.04795	-14.9463		1.1	-0.01057	-0.00831	-0.00566	-0.00529	0	-0.00264	-0.00415	-0.00642		1.1	-4.98209	-8.40728	-9.6528	-79.4021	-37.3657	-42.9705	-44.8388
1.20001	0.521466	0.367867		1.2	-5.60485	-11.8325		1.2	-0.01246	-0.00566	-0.00378	-0.00869	-0.00113	-0.00793	-0.000755	-0.00566		1.2	-7.78452	-13.078	-9.6528	-93.7256	-51.3778	-38.6112	-55.7371
1.30002	0.455404	0.375692		1.3	-5.29347	-8.0959		1.3	-0.00793	-0.00453	-0.00151	-0.00604	-0.00227	-0.00831	-0.000755	-0.00453		1.3	-6.85037	-11.2097	-13.3894	-115.834	-58.2282	-49.8209	-68.8151
1.39999	0.509808	0.373736		1.4	-3.42519	-12.4552		1.4	-0.00906	-0.00566	-0.00453	-0.00302	-0.00151	-0.00566	-0.00151	-0.00415		1.4	-7.16175	-11.5211	-11.8325	-131.403	-70.0606	-66.6355	-80.0248
1.5	0.505922	0.412861		1.5	-4.67071	-12.7666		1.5	-0.01435	-0.00944	-0.0034	-0.00718	-0.00378	-0.00151	-0.00529	-0.00491		1.5	-4.98209	-12.4552	-16.8146	-160.984	-83.45	-82.5159	-104.624
1.60001	0.443747	0.405036		1.6	-5.60485	-7.47313		1.6	-0.01057	-0.00604	-0.00378	-0.00982	-0.0034	-0.0034	-0.00302	-0.0034		1.6	-8.0959	-9.96418	-17.7487	-196.481	-115.834	-99.019	-126.109
1.70001	0.474834	0.410905		1.7	-3.11381	-15.2577		1.7	-0.01057	-0.00453	-0.00529	-0.00831	-0.00415	-0.00566	-0.00378	-0.00566		1.7	-4.98209	-13.3894	-18.9942	-216.721	-152.265	-129.846	-162.541
1.80002	0.463176	0.389386		1.8	-1.86828	-15.569		1.8	-0.0102	-0.00718	0.000378	-0.00453	-0.000378	-0.00453	-0.00302	-0.00566		1.8	-9.03004	-13.7007	-18.9942	-243.811	-194.613	-181.846	-237.583
1.89999	0.474834	0.389386		1.9	-1.5569	-6.22761		1.9	-0.00755	-0.00944	-0.00642	-0.00453	-0.00453	-0.00227	-0.00227	-0.00415		1.9	-8.40728	-13.078	-16.5032	-271.835	-234.781	-243.188	-330.375
2	0.537009	0.37178		2	-1.5569	-11.8325		2	-0.01208	-0.00944	-0.00302	-0.0068	-0.00227	-0.00529	-0.00453	-0.00453		2	-7.16175	-12.7666	-20.2397	-296.746	-279.308	-292.698	-416.005
2.10001	0.548667	0.373736		2.1	-2.80243	-12.4552		2.1	-0.01133	-0.00718	-0.00453	-0.00604	-0.00189	-0.00566	-0.000378	-0.00566		2.1	-7.47313	-14.0121	-25.5332	-326.638	-310.446	-345.944	-508.796
2.20001	0.513694	0.397211		2.2	-2.17966	-13.078		2.2	-0.01208	-0.00869	-0.00151	-0.00869	-0.0034	-0.00604	-0.00189	-0.00264		2.2	-6.85037	-18.6828	-26.7787	-344.387	-358.71	-417.561	-607.815
2.30002	0.513694	0.442206		2.3	-1.24552	-12.4552		2.3	-0.00906	-0.00604	-0.00415	-0.00718	-0.00189	-0.00793	-0.00189	-0.00529		2.3	-5.29347	-14.6349	-28.3356	-381.753	-414.136	-506.928	-712.128
2.39999	0.509808	0.389386		2.4	-6.85037	-16.5032		2.4	-0.00944	-0.00718	-0.00264	-0.00566	-0.00227	-0.00264	-0.00151	-0.00378		2.4	-5.29347	-18.9942	-32.695	-422.232	-476.101	-602.521	-820.488
2.5	0.509808	0.399167		2.5	-5.29347	-10.2756		2.5	-0.00869	-0.00944	-0.00415	-0.00831	-0.00453	-0.00415	-0.00227	-0.00491		2.5	-4.04795	-15.8804	-37.0543	-463.957	-528.102	-688.774	-914.525
2.60001	0.470948	0.373736		2.6	-2.17966	-9.34142		2.6	-0.01284	-0.00982	-0.00378	-0.00642	-0.00378	-0.00491	-0.00302	-0.00302		2.6	-3.73657	-18.0601	-45.1502	-520.006	-575.743	-773.781	-993.616
2.70001	0.525352	0.358086		2.7	4.67071	-14.9463		2.7	-0.0102	-0.00566	-0.00566	-0.00718	-0.00189	-0.00453	-0.00453	-0.00264		2.7	-5.29347	-16.5032	-57.294	-567.958	-626.809	-846.021	-1075.2
2.80002	0.521466	0.375692		2.8	6.53899	-13.078		2.8	-0.00944	-0.00906	-0.0068	-0.00604	-0.00189	-0.00491	-0.00302	-0.00227		2.8	-9.34142	-18.0601	-65.0786	-600.965	-687.528	-925.735	-1151.8
2.89999	0.467062	0.401124		2.9	0	-10.5869		2.9	-0.00982	-0.00869	-0.00302	-0.00869	-0.000755	-0.00415	-0.00415	-0.00566		2.9	-8.40728	-19.617	-64.4558	-619.025	-731.122	-991.436	-1217.5
3	0.529237	0.377648		3	-6.22761	-12.1438		3	-0.01057	-0.00944	-0.00566	-0.00566	-0.00227	-0.00302	-0.00302	-0.00378		3	-11.2097	-14.6349	-70.6834	-645.492	-794.955	-1041.26	-1278.53
3.10001	0.537009	0.383517		3.1	-2.49104	-14.6349		3.1	-0.00906	-0.00453	-0.00529	-0.00831	-0.00642	-0.00415	-0.00264	-0.00529		3.1	-11.2097	-15.569	-69.7493	-658.259	-859.722	-1093.88	-1324.3
3.20001	0.509808	0.389386		3.2	-2.49104	-8.40728		3.2	-0.01586	-0.00869	-0.00302	-0.00642	-0.00302	-0.00227	-0.00151	-0.00302		3.2	-6.85037	-21.7966	-82.5159	-683.792	-915.148	-1134.67	-1349.21
3.30002	0.486492	0.363954		3.3	-3.11381	-14.9463		3.3	-0.00982	-0.00755	-0.00264	-0.00604	-0.00491	-0.00491	-0.00189	-0.00529		3.3	-8.0959	-27.4015	-90.9231	-719.289	-951.579	-1181.07	-1382.22
3.39999	0.521466	0.38743		3.4	-1.5569	-10.2756		3.4	-0.00755	-0.00529	-0.00378	-0.00793	-0.0034	-0.0068	-0.00566	-0.00529		3.4	-8.71866	-29.5812	-99.6418	-738.906	-983.029	-1215.63	-1404.02
3.5	0.521466	0.391342		3.5	-6.53899	-8.71866		3.5	-0.00906	-0.00793	-0.000755	-0.00869	-0.00189	-0.00491	-0.00227	-0.00491		3.5	-7.78452	-27.7129	-112.72	-750.427	-995.484	-1229.02	-1396.54
3.60001	0.463176	0.375692		3.6	-6.85037	-14.3235		3.6	-0.00831	-0.00982	-0.00189	-0.00982	-0.00189	-0.000755	-0.00415	-0.00189		3.6	-6.85037	-34.2519	-124.241	-752.607	-996.107	-1235.56	-1392.18
3.70001	0.49815	0.405036		3.7	-3.42519	-9.34142		3.7	-0.00869	-0.0068	-0.00302	-0.00604	-0.00264	-0.00453	-0.00491	-0.00378		3.7	-9.96418	-31.7608	-131.091	-755.409	-1011.68	-1250.5	-1371.01
3.80002	0.482606	0.367867		3.8	-4.04795	-9.03004		3.8	-0.00793	-0.00604	-0.00566	-0.00755	-0.00566	-0.00264	-0.00302	-0.00604		3.8	-12.1438	-32.0722	-132.337	-779.074	-1019.77	-1256.11	-1352.01
3.89999	0.540895	0.373736		3.9	-1.24552	-11.8325		3.9	-0.01171	-0.00982	-0.00529	-0.00566	-0.00415	-0.00302	-0.00302	-0.00415		3.9	-11.2097	-36.4315	-143.235	-801.494	-1030.05	-1259.22	-1337.69
4	0.509808	0.361998		4	-1.24552	-16.8146		4	-0.01057	-0.00755	-0.00227	-0.00831	-0.00302	-0.00302	-0.00302	-0.00378		4	-11.8325	-39.5453	-142.301	-824.847	-1040.95	-1265.14	-1312.78
4.10001	0.49815	0.367867		4.1	-0.31138	-10.8983		4.1	-0.01057	-0.00718	-0.00113	-0.00642	-0.00642	-0.00529	-0.00642	-0.00491		4.1	-9.96418	-40.4795	-146.038	-834.811	-1038.45	-1257.67	-1297.21
4.20001	0.486492	0.369823		4.2	-4.35933	-9.03004		4.2	-0.00869	-0.00793	-0.00113	-0.00869	-0.00415	-0.00491	-0.00453	-0.00302		4.2	-7.78452	-46.0843	-140.121	-848.201	-1048.42	-1244.28	-1257.35
4.30002	0.540895	0.363954		4.3	-7.78452	-13.3894		4.3	-0.00869	-0.00604	-0.00378	-0.00869	-0.00302	-0.00642	-0.00378	-0.00227		4.3	-8.40728	-44.8388	-138.564	-840.416	-1051.84	-1246.15	-1226.84
4.39999	0.568097	0.414818		4.4	-4.98209	-12.4552		4.4	-0.00755	-0.00718	-0.00189	-0.00944	-0.00378	-0.00302	-0.00227	-0.00566		4.4	-8.0959	-50.1323	-142.301	-846.021	-1054.02	-1242.41	-1209.09
4.5	0.505922	0.385474		4.5	-5.29347	-12.7666		4.5	-0.00793	-0.00793	-0.000755	-0.00869	-0.00227	-0.00264	-0.00566	-0.00529		4.5	-8.0959	-52.3119	-152.577	-853.183	-1036.27	-1229.02	-1178.58
4.60001	0.51758	0.38743		4.6	-6.85037	-12.1438		4.6	-0.0102	-0.00944	-0.00491	-0.00831	-0.00378	-0.00453	-0.00227	-0.0034		4.6	-9.96418	-54.1802	-158.493	-840.728	-1041.26	-1217.81	-1149.62
4.70001	0.455404	0.383517		4.7	-3.73657	-13.3894		4.7	-0.01133	-0.00944	-0.00755	-0.0102	-0.00189	-0.00189	-0.00453	-0.00113		4.7	-10.2756	-61.6534	-171.571	-861.59	-1051.84	-1202.55	-1116.92
4.80002	0.490378	0.375692		4.8	-1.5569	-9.03004		4.8	-0.0068	-0.00718	-0.00227	-0.0068	-0.00453	-0.00529	-0.0034	-0.00453		4.8	-14.0121	-58.2282	-175.307	-859.099	-1051.84	-1182.62	-1086.41
4.89999	0.509808	0.328741		4.9	1.5569	-11.2097		4.9	-0.00982	-0.00604	-0.00264	-0.00566	-0.00189	-0.00378	-0.000755	-0.00453		4.9	-12.4552	-53.8688	-177.798	-852.56	-1045.93	-1154.6	-1053.09
5	0.463176	0.379605		5	-3.42519	-8.71866		5	-0.00831	-0.0068	-0.00415	-0.00982	-0.00415	-0.00264	-0.00189	-0.00151		5	-9.34142	-55.4258	-171.571	-853.494	-1037.21	-1142.46	-1016.97
5.10001	0.490378	0.397211		5.1	-0.93414	-10.5869		5.1	-0.0102	-0.00415	-0.00415	-0.01133	-0.0034	-0.00529	0.000378	-0.00378		5.1	-10.5869	-57.294	-179.667	-845.71	-1008.87	-1135.61	-998.286
5.20001	0.540895	0.373736		5.2	-3.42519	-13.3894		5.2	-0.00869	-0.00642	-0.00302	-0.00491	-0.00453	-0.00415	-0.00491	-0.00227		5.2	-9.6528	-62.2761	-191.499	-822.668	-994.55	-1123.77	-982.717
5.30002	0.47872	0.356129		5.3	-4.04795	-8.0959		5.3	-0.00944	-0.0068	-0.00302	-0.00982	-0.00453	-0.00227	-0.00453	-0.00491		5.3	-8.0959	-58.2282	-194.302	-800.248	-988.945	-1083.92	-948.154
5.39999	0.51758	0.369823		5.4	3.42519	-14.3235		5.4	-0.00906	-0.00869	-0.00264	-0.01095	-0.00566	-0.00642	-0.00604	-0.0034		5.4	-10.5869	-60.0965	-189.631	-791.53	-973.064	-1073.95	-913.591
5.5	0.49815	0.363954		5.5	0	-10.5869		5.5	-0.0102	-0.00529	-0.00378	-0.00906	-0.00415	0	-0.00453	-0.00415		5.5	-9.03004	-66.3241	-199.906	-765.374	-946.597	-1045.62	-894.285
5.60001	0.49815	0.358086		5.6	-2.80243	-8.40728		5.6	-0.01095	-0.01057	-0.00302	-0.01057	-0.00264	-0.00415	-0.00302	-0.00491		5.6	-8.0959	-73.7972	-203.643	-748.559	-958.43	-1024.44	-886.501
5.70001	0.556439	0.379605		5.7	-2.17966	-12.7666		5.7	-0.01057	-0.00982	-0.00491	-0.00529	-0.00491	-0.000378	-0.00302	-0.00264		5.7	-9.34142	-72.5517	-197.727	-734.236	-949.4	-990.19	-875.602
5.80002	0.509808	0.365911		5.8	-5.29347	-8.71866		5.8	-0.00529	-0.00642	-0.00189	-0.00718	-0.00453	-0.00491	-0.00415	-0.000378		5.8	-7.47313	-80.3362	-199.595	-722.403	-930.094	-949.4	-852.872
5.89999	0.525352	0.356129		5.9	-4.98209	-9.6528		5.9	-0.00642	-0.00642	-0.00453	-0.00793	-0.00566	-0.00378	-0.0034	-0.00189		5.9	-9.03004	-79.7134	-199.595	-710.259	-907.363	-928.848	-840.105
6	0.467062	0.352217		6	-1.24552	-10.5869		6	-0.01057	-0.00453	-0.00302	-0.00755	-0.0068	-0.0034	-0.00529	-0.00415		6	-8.0959	-71.9289	-210.493	-701.852	-886.812	-916.705	-824.536
6.10001	0.521466	0.356129		6.1	-1.86828	-11.5211		6.1	-0.00869	-0.0068	-0.00302	-0.00566	-0.0034	-0.00604	-0.00453	-0.00453		6.1	-9.6528	-74.42	-216.098	-697.493	-858.165	-900.824	-805.23
6.20001	0.505922	0.373736		6.2	-4.98209	-10.5869		6.2	-0.01057	-0.00755	-0.00529	-0.00944	-0.00604	-0.00378	-0.00491	0.00113		6.2	-8.71866	-79.0907	-226.062	-684.103	-844.776	-884.01	-775.961
6.30002	0.47872	0.365911		6.3	-4.04795	-10.5869		6.3	-0.00906	-0.0068	-0.00227	-0.01171	-0.00415	-0.00415	-0.0034	-0.00415		6.3	-8.40728	-77.5338	-236.027	-672.894	-824.224	-854.117	-743.577
6.39999	0.525352	0.365911		6.4	-3.11381	-16.8146		6.4	-0.00793	-0.00453	-0.0034	-0.00906	-0.00831	-0.00453	-0.00415	-0.00189		6.4	-7.78452	-79.0907	-237.272	-653.277	-808.655	-823.29	-717.11
6.5	0.432089	0.369823		6.5	-3.73657	-14.9463		6.5	-0.01057	-0.01133	-0.00453	-0.00906	-0.0068	-0.00453	-0.00529	-0.00302		6.5	-9.34142	-81.5817	-244.122	-639.576	-793.709	-804.296	-696.558
6.60001	0.463176	0.383517		6.6	-2.49104	-7.47313		6.6	-0.00642	-0.0068	-0.00415	-0.00944	-0.00264	0	-0.00453	-0.00491		6.6	-7.16175	-72.5517	-250.661	-644.869	-784.679	-803.362	-690.331
6.70001	0.505922	0.348304		6.7	-2.17966	-10.8983		6.7	-0.00566	-0.00831	-0.00491	-0.01095	-0.00491	-0.00302	-0.0034	-0.00189		6.7	-10.8983	-73.7972	-252.841	-639.887	-766.619	-785.925	-672.582
6.80002	0.47872	0.405036		6.8	-4.98209	-14.3235		6.8	-0.00906	-0.00566	-0.00491	-0.00869	-0.00831	-0.00378	-0.00491	-0.00227		6.8	-10.5869	-70.9948	-257.2	-635.216	-756.966	-772.535	-657.013
6.89999	0.486492	0.383517		6.9	-3.73657	-8.71866		6.9	-0.01171	-0.00604	-0.00264	-0.00529	-0.00491	-0.0034	-0.00642	-0.00491		6.9	-10.8983	-74.1086	-258.757	-618.402	-754.475	-756.966	-654.833
7	0.49815	0.361998		7	-4.35933	-11.5211		7	-0.00831	-0.00529	-0.00529	-0.01171	-0.00529	-0.000378	-0.0034	-0.00189		7	-14.3235	-67.2582	-249.104	-605.635	-739.218	-735.792	-643.001
7.10001	0.521466	0.365911		7.1	-2.80243	-9.03004		7.1	-0.0068	-0.00604	-0.00566	-0.00755	-0.00604	-0.00264	-0.00604	-0.0068		7.1	-9.6528	-70.9948	-251.596	-587.264	-734.547	-710.259	-624.007
7.20001	0.49815	0.37178		7.2	-6.53899	-12.7666		7.2	-0.00755	-0.00869	-0.00264	-0.01246	-0.00189	-0.00566	-0.00378	-0.0034		7.2	-10.2756	-76.5996	-249.727	-580.414	-713.062	-683.169	-606.881
7.30002	0.47872	0.350261		7.3	-4.04795	-11.8325		7.3	-0.01057	-0.00642	-0.00227	-0.00642	-0.00491	-0.00453	-0.00755	-0.00453		7.3	-10.5869	-76.5996	-249.727	-579.479	-700.606	-667.911	-594.737
7.39999	0.486492	0.395255		7.4	-3.42519	-13.3894		7.4	-0.00793	-0.0034	-0.00378	-0.01095	-0.00755	-0.00453	-0.00453	-0.00113		7.4	-9.34142	-77.2224	-254.087	-570.449	-677.876	-649.851	-579.479
7.5	0.482606	0.393299		7.5	-5.29347	-13.3894		7.5	-0.00529	-0.00491	-0.00227	-0.0136	-0.00566	-0.00453	-0.00302	-0.00113		7.5	-10.2756	-83.7614	-243.5	-560.797	-659.504	-636.151	-562.976
7.60001	0.490378	0.363954		7.6	-4.04795	-12.1438		7.6	-0.0068	-0.00642	-0.00453	-0.00378	-0.00604	-0.00264	-0.00415	-0.00302		7.6	-13.078	-91.5459	-232.29	-547.719	-643.935	-620.893	-552.701
7.70001	0.474834	0.350261		7.7	-2.49104	-13.078		7.7	-0.00755	-0.01095	-0.00415	-0.0068	-0.00378	-0.00264	-0.00566	-0.00264		7.7	-12.4552	-89.989	-243.188	-529.658	-651.097	-595.048	-548.03
7.80002	0.45929	0.363954		7.8	-6.22761	-14.3235		7.8	-0.00831	-0.0068	-0.00529	-0.0068	-0.00642	-0.00755	-0.00642	-0.00453		7.8	-10.5869	-91.8573	-241.32	-515.958	-637.708	-590.689	-540.868
7.89999	0.470948	0.365911		7.9	-7.16175	-10.8983		7.9	-0.0102	-0.0034	-0.00491	-0.00869	-0.00604	-0.00302	-0.00378	-0.00151		7.9	-14.3235	-92.48	-246.302	-507.862	-620.27	-572.629	-524.988
8	0.47872	0.373736		8	-4.04795	-11.5211		8	-0.01246	-0.00491	-0.00453	-0.00944	-0.00415	-0.00227	-0.00453	-0.00302		8	-10.5869	-95.2825	-248.793	-499.455	-591.935	-556.437	-524.988
8.10001	0.540895	0.360042		8.1	-4.67071	-11.8325		8.1	-0.01171	-0.00529	-0.00491	-0.00793	-0.00529	-0.0034	-0.00415	-0.00302		8.1	-10.2756	-96.8394	-257.512	-486.999	-569.827	-543.359	-517.203
8.20001	0.463176	0.361998		8.2	-3.42519	-14.9463		8.2	-0.0068	-0.00491	-0.00755	-0.00869	-0.00415	-0.00264	-0.00529	0		8.2	-11.8325	-96.8394	-260.626	-488.868	-561.108	-538.377	-510.976
8.30002	0.416545	0.365911		8.3	-4.04795	-15.569		8.3	-0.0068	-0.00642	-0.00453	-0.00944	-0.00831	-0.00302	-0.00566	-0.00453		8.3	-14.3235	-92.1687	-255.955	-493.85	-554.569	-537.132	-501.946
8.39999	0.435975	0.369823		8.4	-2.49104	-13.078		8.4	-0.00566	-0.00831	-0.00453	-0.01171	-0.00491	-0.00453	-0.00453	-0.00264		8.4	-14.0121	-94.3483	-248.793	-474.855	-557.06	-518.137	-488.868
8.5	0.47872	0.352217		8.5	-3.73657	-10.2756		8.5	-0.00302	-0.00642	-0.00453	-0.00793	-0.00604	-0.00378	-0.00491	0		8.5	-11.2097	-95.2825	-254.709	-466.76	-556.437	-514.712	-464.269
8.60001	0.486492	0.350261		8.6	-4.04795	-10.2756		8.6	-0.00906	-0.00529	-0.00453	-0.0102	-0.0068	-0.0034	-0.00793	-0.00302		8.6	-12.7666	-92.48	-246.613	-451.191	-551.144	-504.748	-447.143
8.70001	0.509808	0.383517		8.7	-7.16175	-17.4373		8.7	-0.00944	-0.00566	-0.00151	-0.00869	-0.00529	-0.00566	-0.00453	-0.00491		8.7	-12.1438	-94.0369	-238.518	-438.424	-545.227	-493.538	-440.604
8.80002	0.509808	0.354173		8.8	-8.0959	-12.7666		8.8	-0.00642	-0.00718	-0.00869	-0.00944	-0.00491	-0.00378	-0.00604	-0.00264		8.8	-11.5211	-97.4621	-224.817	-436.867	-521.563	-473.61	-427.214
8.89999	0.455404	0.350261		8.9	-6.53899	-10.2756		8.9	-0.00906	-0.00491	-0.00378	-0.00982	-0.00604	-0.00415	-0.00453	-0.00227		8.9	-11.8325	-96.528	-213.607	-433.753	-505.682	-468.005	-411.645
9	0.467062	0.363954		9	-4.04795	-13.3894		9	-0.00944	-0.00755	-0.00415	-0.00944	-0.00604	-0.0034	-0.00491	-0.00453		9	-13.078	-93.1028	-209.559	-427.837	-495.718	-463.957	-395.453
9.10001	0.505922	0.340479		9.1	-2.80243	-9.34142		9.1	-0.00869	-0.00604	-0.00529	-0.01095	-0.00906	0	-0.00491	-0.0034		9.1	-10.8983	-94.0369	-212.984	-425.035	-490.736	-449.011	-382.064
9.20001	0.428203	0.33461		9.2	-4.98209	-13.078		9.2	-0.00453	-0.00831	-0.00453	-0.00831	-0.00529	-0.00604	-0.00415	-0.00264		9.2	-10.5869	-82.8272	-221.703	-416.005	-475.167	-443.717	-376.148
9.30002	0.47872	0.342435		9.3	-3.11381	-12.7666		9.3	-0.00906	-0.00566	-0.00642	-0.00793	-0.00529	-0.00264	-0.00642	-0.00113		9.3	-11.2097	-87.8093	-226.996	-407.909	-460.532	-443.095	-374.591
9.39999	0.474834	0.361998		9.4	-6.22761	-12.4552		9.4	-0.00642	-0.00491	-0.00415	-0.00793	-0.00491	-0.00642	-0.00529	-0.00264		9.4	-10.5869	-86.5638	-221.392	-408.843	-459.598	-430.017	-371.477
9.5	0.513694	0.363954		9.5	-8.40728	-13.3894		9.5	-0.0068	-0.00642	-0.00869	-0.00755	-0.0068	-0.00529	-0.00718	-0.00264		9.5	-10.5869	-80.0248	-206.134	-394.208	-445.274	-417.561	-366.184
9.60001	0.451519	0.354173		9.6	-4.67071	-14.9463		9.6	-0.00604	-0.00491	-0.0034	-0.00869	-0.0034	-0.00302	-0.00491	-0.00378		9.6	-10.2756	-84.6955	-204.888	-383.31	-437.178	-412.268	-356.531
9.70001	0.486492	0.352217		9.7	-4.98209	-10.2756		9.7	-0.00604	-0.0068	-0.00189	-0.00604	-0.00453	-0.000378	-0.00642	-0.00227		9.7	-12.1438	-91.2345	-217.344	-368.675	-424.1	-398.567	-347.501
9.80002	0.432089	0.328741		9.8	-5.29347	-15.2577		9.8	-0.0068	-0.00604	-0.00415	-0.00906	-0.00529	-0.00491	-0.00453	-0.00415		9.8	-10.5869	-83.45	-216.098	-362.447	-418.496	-395.142	-340.65
9.89999	0.47872	0.358086		9.9	-5.60485	-13.078		9.9	-0.0068	-0.00755	-0.00566	-0.01057	-0.00264	-0.00264	-0.00264	-0.00189		9.9	-10.8983	-81.8931	-220.769	-348.435	-407.909	-386.735	-332.555
10	0.49815	0.369823		10	-5.60485	-12.1438		10	-0.01095	-0.00566	-0.00453	-0.00642	-0.00755	-0.00302	-0.00491	-0.00227		10	-7.16175	-91.2345	-226.996	-348.124	-393.896	-380.196	-330.686
10.1	0.521466	0.342435		10.1	-6.53899	-13.3894		10.1	-0.00491	-0.00189	-0.0068	-0.00529	-0.00453	-0.00491	-0.00604	-0.0034		10.1	-9.03004	-98.7077	-227.931	-342.519	-383.621	-368.986	-328.195
10.2	0.45929	0.338523		10.2	-2.17966	-10.8983		10.2	-0.0102	-0.00453	-0.0068	-0.01095	-0.00453	-0.00529	-0.00604	-0.00151		10.2	-9.6528	-98.7077	-220.457	-345.944	-382.998	-364.004	-319.165
10.3	0.428203	0.342435		10.3	-4.67071	-14.0121		10.3	-0.00755	-0.00604	-0.00378	-0.00718	-0.0102	-0.00264	-0.00642	-0.00189		10.3	-8.71866	-98.0849	-221.703	-333.177	-367.741	-353.106	-315.74
10.4	0.502036	0.324829		10.4	-7.47313	-10.5869		10.4	-0.00869	-0.00491	-0.0068	-0.0068	-0.00869	-0.00378	-0.00604	-0.00264		10.4	-10.5869	-88.4321	-218.589	-319.788	-352.171	-350.926	-315.429
10.5	0.447633	0.352217		10.5	-9.03004	-12.1438		10.5	-0.00453	-0.0068	-0.00453	-0.00982	-0.00566	-0.00529	-0.0034	-0.00604		10.5	-11.5211	-86.5638	-216.41	-315.429	-352.483	-338.159	-304.53
10.6	0.428203	0.358086		10.6	-6.22761	-14.0121		10.6	-0.00906	-0.00755	-0.00529	-0.0068	-0.00642	-0.00378	-0.00604	-0.0034		10.6	-11.8325	-88.7435	-222.326	-312.003	-345.01	-322.59	-309.201
10.7	0.47872	0.346348		10.7	-6.22761	-12.1438		10.7	-0.01133	-0.00151	-0.0068	-0.0068	-0.00642	-0.00415	-0.00529	-0.00491		10.7	-11.8325	-81.2703	-223.883	-314.806	-339.405	-314.183	-301.416
10.8	0.463176	0.328741		10.8	-4.04795	-12.4552		10.8	-0.01133	-0.00604	-0.00227	-0.00944	-0.00755	-0.00566	-0.00378	-0.00529		10.8	-12.4552	-78.1565	-216.41	-307.021	-336.914	-309.201	-301.105
10.9	0.467062	0.31896		10.9	-6.53899	-9.96418		10.9	-0.01246	-0.00831	-0.00755	-0.00944	-0.00566	-0.00415	-0.00642	-0.00227		10.9	-10.2756	-87.1866	-215.787	-298.925	-319.165	-307.333	-288.338
11	0.377686	0.344392		11	-5.91623	-16.5032		11	-0.00378	-0.00529	-0.00642	-0.00566	-0.0068	-0.00604	-0.00453	-0.00302		11	-9.34142	-87.1866	-212.05	-295.189	-313.56	-306.087	-283.979
11.1	0.404887	0.346348		11.1	-3.42519	-11.2097		11.1	-0.00755	-0.0034	-0.00642	-0.00793	-0.00793	-0.00227	-0.00642	-0.00227		11.1	-11.8325	-88.4321	-204.577	-291.452	-314.183	-306.399	-280.554
11.2	0.412659	0.332654		11.2	-9.96418	-13.078		11.2	-0.00944	-0.00642	-0.00755	-0.00831	-0.00906	-0.00415	-0.0068	0.000378		11.2	-9.34142	-85.0069	-200.529	-291.452	-328.507	-301.728	-274.015
11.3	0.393229	0.33461		11.3	-6.22761	-13.078		11.3	-0.0102	-0.00604	-0.00642	-0.00718	-0.0068	-0.00491	-0.00491	-0.00529		11.3	-10.2756	-89.0549	-201.152	-294.255	-311.692	-296.123	-279.62
11.4	0.474834	0.324829		11.4	-5.91623	-9.96418		11.4	-0.01246	-0.00566	-0.00604	-0.00642	-0.00566	-0.00529	-0.00491	-0.00453		11.4	-11.2097	-91.5459	-190.876	-292.386	-297.68	-287.404	-269.967
11.5	0.428203	0.30331		11.5	-9.34142	-12.1438		11.5	-0.01435	-0.00755	-0.00793	-0.00944	-0.00491	-0.00227	-0.0068	-0.00491		11.5	-13.078	-92.1687	-193.056	-281.799	-283.045	-278.374	-264.362
11.6	0.443747	0.342435		11.6	-7.47313	-14.0121		11.6	-0.0102	-0.00566	-0.00529	-0.00604	-0.00793	-0.00151	-0.00566	-0.00302		11.6	-13.7007	-93.1028	-197.727	-282.422	-266.23	-276.817	-255.332
11.7	0.47872	0.311135		11.7	-7.16175	-10.2756		11.7	-0.0068	-0.0068	-0.00491	-0.00793	-0.00415	-0.00906	-0.0034	-0.00415		11.7	-11.5211	-91.5459	-190.254	-282.111	-263.117	-275.572	-249.727
11.8	0.467062	0.270053		11.8	-8.0959	-14.3235		11.8	-0.00491	-0.00302	-0.00642	-0.00869	-0.00755	-0.00302	-0.00227	-0.00415		11.8	-13.7007	-95.5938	-182.469	-280.243	-266.542	-265.608	-251.907
11.9	0.451519	0.207452		11.9	-5.29347	-13.3894		11.9	-0.01322	-0.00491	-0.00755	-0.00642	-0.0068	-0.00302	-0.00453	-0.00378		11.9	-12.1438	-99.9532	-178.732	-267.476	-268.099	-265.919	-251.596
12	0.393229	0.144851		12	-5.91623	-14.3235		12	-0.00642	-0.00453	-0.00604	-0.00415	-0.00604	-0.00453	-0.00566	-0.00529		12	-8.0959	-98.7077	-176.241	-261.248	-260.937	-269.033	-248.793
12.1	0.299967	-0.00187		12.1	-7.16175	-10.2756		12.1	-0.00718	-0.00378	-0.00906	-0.00642	-0.00869	-0.00604	-0.00642	-0.00227		12.1	-11.5211	-94.0369	-171.571	-262.494	-256.266	-264.362	-241.631
12.2	0.245564	-0.14468		12.2	-7.16175	-17.1259		12.2	-0.00793	-0.00718	-0.00869	-0.00529	-0.00491	-0.00302	-0.00491	-0.0034		12.2	-10.5869	-88.4321	-174.996	-268.099	-257.512	-264.674	-240.697
12.3	0.214476	-0.34813		12.3	-7.78452	-14.3235		12.3	-0.00642	-0.00302	-0.00529	-0.00227	-0.00793	-0.0068	-0.0034	-0.00227		12.3	-9.6528	-85.3183	-176.553	-263.739	-261.56	-260.626	-230.422
12.4	0.183388	-0.53593		12.4	-3.42519	-12.1438		12.4	-0.00982	-0.00415	-0.00604	-0.00604	-0.00302	-0.0068	-0.00302	-0.00529		12.4	-14.0121	-87.1866	-176.553	-259.38	-250.35	-257.2	-227.619
12.5	0.10567	-0.76286		12.5	-3.11381	-14.9463		12.5	-0.0068	-0.00642	-0.00491	-0.00642	-0.00566	-0.00491	-0.00264	-0.00378		12.5	-10.2756	-80.6476	-166.589	-248.17	-242.877	-250.973	-226.685
12.6	0.004635	-0.9937		12.6	-5.60485	-13.3894		12.6	-0.00944	-0.00604	-0.00302	-0.00831	-0.00755	-0.00491	-0.00566	-0.00604		12.6	-12.1438	-81.5817	-164.72	-244.745	-237.583	-244.745	-223.883
12.7	-0.17023	-1.25193		12.7	-5.60485	-12.1438		12.7	-0.01322	-0.00264	-0.00869	-0.0068	-0.0068	-0.00264	-0.00491	-0.00453		12.7	-12.1438	-78.7793	-167.211	-236.027	-244.434	-241.943	-229.176
12.8	-0.38785	-1.5845		12.8	-7.16175	-13.078		12.8	-0.01133	-0.0068	-0.00491	-0.00604	-0.00755	-0.00529	-0.00491	-0.00151		12.8	-13.7007	-72.5517	-170.014	-233.847	-238.206	-236.027	-221.08
12.9	-0.58991	-1.93076		12.9	-4.67071	-12.4552		12.9	-0.0136	-0.00566	-0.00642	-0.00982	-0.00793	-0.0034	-0.00604	-0.00264		12.9	-11.8325	-79.0907	-169.391	-231.356	-229.799	-231.667	-212.673
13	-1.01348	-2.30049		13	-4.04795	-13.078		13	-0.00982	-0.00151	-0.00642	-0.00566	-0.00604	-0.00642	-0.00227	-0.00529		13	-10.8983	-81.5817	-168.457	-223.883	-227.619	-227.619	-212.362
13.1	-1.37487	-2.62524		13.1	-9.34142	-14.6349		13.1	-0.0068	-0.00529	-0.00604	-0.00566	-0.00604	-0.00453	-0.00415	-0.00302		13.1	-11.5211	-85.9411	-176.553	-224.194	-219.835	-221.08	-210.805
13.2	-1.74404	-2.95976		13.2	-8.0959	-15.2577		13.2	-0.01095	-0.00604	-0.00491	-0.00642	-0.00566	-0.00453	-0.00264	-0.0034		13.2	-8.0959	-85.9411	-169.391	-223.571	-217.032	-222.326	-208.002
13.3	-2.086	-3.28059		13.3	-7.16175	-12.7666		13.3	-0.00982	-0.00302	-0.00869	-0.00755	-0.00491	-0.00529	-0.00415	-0.00604		13.3	-10.2756	-89.3662	-164.72	-210.805	-209.871	-217.966	-208.002
13.4	-2.50957	-3.60142		13.4	-7.47313	-15.569		13.4	-0.0068	-0.00604	-0.00491	-0.00906	-0.00793	-0.00491	-0.0034	-0.00642		13.4	-12.4552	-92.1687	-162.541	-198.349	-205.823	-216.098	-201.152
13.5	-2.94091	-3.87334		13.5	-6.85037	-10.8983		13.5	-0.00755	-0.00566	-0.00755	-0.0068	-0.00415	-0.00302	-0.00491	-0.0034		13.5	-13.3894	-92.7914	-165.966	-198.972	-207.691	-213.296	-191.81
13.6	-3.23236	-4.05528		13.6	-7.16175	-13.3894		13.6	-0.00944	-0.00491	-0.00944	-0.00227	-0.0068	-0.00227	-0.00453	-0.00453		13.6	-16.8146	-99.019	-163.786	-204.577	-204.888	-205.823	-186.206
13.7	-3.48494	-4.22547		13.7	-7.16175	-12.7666		13.7	-0.00831	-0.00566	-0.00718	-0.00718	-0.00491	-0.00793	-0.00566	-0.00566		13.7	-15.2577	-103.69	-161.918	-208.314	-194.924	-209.559	-183.715
13.8	-3.7997	-4.35654		13.8	-7.47313	-16.5032		13.8	-0.00869	-0.00415	-0.00453	-0.00718	-0.00415	-0.00604	-0.00604	-0.00529		13.8	-13.078	-104.624	-157.559	-202.709	-194.924	-209.248	-184.026
13.9	-4.03286	-4.52087		13.9	-8.71866	-12.4552		13.9	-0.0102	-0.00566	-0.00642	-0.00529	-0.00566	-0.00529	-0.00529	-0.00491		13.9	-12.7666	-106.492	-145.726	-204.888	-196.793	-212.673	-178.11
14	-4.25047	-4.64607		14	-9.6528	-10.5869		14	-0.00944	-0.00453	-0.00566	-0.0068	-0.0068	-0.00529	-0.00302	-0.00227		14	-11.2097	-105.869	-143.235	-201.152	-192.745	-214.541	-167.523
14.1	-4.38648	-4.70476		14.1	-7.78452	-15.569		14.1	-0.00869	-0.00566	-0.00604	-0.00264	-0.00642	-0.00529	-0.0034	-0.00264		14.1	-14.6349	-106.492	-143.546	-198.349	-200.529	-208.314	-169.391
14.2	-4.45643	-4.77714		14.2	-4.98209	-11.2097		14.2	-0.00906	-0.00378	-0.01133	-0.00566	-0.00491	-0.00793	-0.00415	-0.00491		14.2	-13.078	-102.133	-143.235	-199.284	-202.397	-211.739	-168.146
14.3	-4.53803	-4.85735		14.3	-2.49104	-12.4552		14.3	-0.00604	-0.00189	-0.0068	-0.00378	-0.00264	-0.00566	-0.00378	-0.00831		14.3	-15.2577	-101.199	-151.642	-193.367	-191.188	-211.739	-165.966
14.4	-4.56523	-4.88278		14.4	-5.60485	-15.2577		14.4	-0.00831	-0.00755	-0.0068	-0.00604	-0.00604	-0.00642	-0.00491	-0.00529		14.4	-14.6349	-103.378	-148.84	-195.547	-185.271	-199.595	-163.163
14.5	-4.5458	-4.85344		14.5	-9.03004	-11.5211		14.5	-0.00529	-0.00491	-0.00604	-0.00793	-0.00302	-0.00415	-0.00604	-0.00378		14.5	-16.5032	-99.6418	-147.594	-194.924	-183.715	-191.499	-162.852
14.6	-4.5458	-4.85148		14.6	-6.53899	-12.4552		14.6	-0.01246	-0.00529	-0.00378	-0.00642	-0.00529	-0.00415	-0.00415	-0.00642		14.6	-12.7666	-97.7735	-152.888	-204.577	-174.062	-185.271	-156.936
14.7	-4.54969	-4.86517		14.7	-8.40728	-19.3056		14.7	-0.01171	-0.00604	-0.00718	-0.00529	-0.00491	-0.0034	-0.00415	-0.00529		14.7	-13.3894	-96.528	-151.331	-199.284	-181.535	-184.649	-162.541
14.8	-4.53415	-4.83974		14.8	-11.2097	-14.3235		14.8	-0.01095	-0.00642	-0.00755	-0.00415	-0.00566	-0.00415	-0.00378	-0.00378		14.8	-9.03004	-98.3963	-154.756	-198.661	-179.667	-182.469	-161.918
14.9	-4.49917	-4.78888		14.9	-6.22761	-14.0121		14.9	-0.01057	-0.00604	-0.00453	-0.00491	-0.00604	-0.00755	-0.00378	-0.00227		14.9	-11.5211	-93.4142	-159.427	-192.433	-171.882	-184.96	-154.756
15	-4.47197	-4.8104		15	-5.60485	-13.3894		15	-0.00755	-0.0034	-0.00302	-0.00415	-0.00491	-0.00982	-0.00378	-0.00415		15	-9.34142	-86.5638	-155.379	-189.942	-170.637	-184.337	-148.84
15.1	-4.5186	-4.79475		15.1	-4.04795	-14.3235		15.1	-0.0102	-0.00529	-0.00982	-0.00604	-0.00604	-0.00453	-0.00491	-0.00453		15.1	-8.0959	-82.8272	-151.954	-186.828	-167.523	-183.092	-150.397
15.2	-4.47974	-4.75758		15.2	-5.29347	-18.0601		15.2	-0.01095	-0.00869	-0.00604	-0.0034	-0.0034	-0.0034	-0.0034	-0.00227		15.2	-12.1438	-85.9411	-151.642	-192.745	-163.786	-179.355	-149.774
15.3	-4.38259	-4.71845		15.3	-4.04795	-14.3235		15.3	-0.01208	-0.00453	-0.00453	-0.00604	-0.00453	-0.00906	-0.00264	-0.0034		15.3	-8.71866	-76.2883	-146.349	-190.876	-164.098	-186.517	-145.415
15.4	-4.42923	-4.68128		15.4	-5.60485	-12.1438		15.4	-0.0102	-0.00529	-0.00642	-0.0068	-0.00566	-0.00378	-0.00415	-0.0068		15.4	-11.2097	-83.1386	-141.055	-189.942	-165.343	-190.254	-149.151
15.5	-4.4642	-4.6089		15.5	-8.0959	-13.078		15.5	-0.01133	-0.0034	-0.00642	-0.0034	-0.00491	-0.00604	-0.00491	-0.00378		15.5	-8.71866	-86.5638	-132.337	-186.828	-160.984	-188.385	-149.151
15.6	-4.39425	-4.54239		15.6	-7.78452	-15.2577		15.6	-0.01624	-0.00604	-0.00982	-0.00151	-0.00264	-0.00491	-0.00491	-0.00529		15.6	-14.0121	-93.1028	-131.091	-193.056	-154.133	-184.026	-140.433
15.7	-4.28156	-4.515		15.7	-7.47313	-12.7666		15.7	-0.00982	-0.00264	-0.00453	-0.00944	-0.00491	-0.00491	-0.00453	-0.00491		15.7	-11.8325	-87.1866	-127.977	-189.008	-154.445	-178.11	-143.858
15.8	-4.16887	-4.50131		15.8	-3.11381	-15.569		15.8	-0.00869	-0.00378	-0.00944	-0.0068	-0.00491	-0.00718	-0.00302	-0.00529		15.8	-10.2756	-86.5638	-119.882	-185.271	-150.085	-181.224	-142.612
15.9	-4.17275	-4.47783		15.9	-7.16175	-10.5869		15.9	-0.00869	-0.00869	-0.00906	-0.00491	-0.00189	-0.00755	-0.00227	-0.00227		15.9	-10.8983	-83.7614	-127.355	-184.649	-146.66	-173.439	-142.301
16	-4.09115	-4.45044		16	-8.0959	-11.2097		16	-0.01133	-0.00642	-0.00642	-0.0068	-0.00566	-0.00529	-0.00491	-0.00529		16	-9.96418	-88.1207	-130.78	-184.649	-151.642	-166.277	-138.876
16.1	-4.09503	-4.40545		16.1	-6.22761	-14.6349		16.1	-0.00906	-0.00604	-0.00566	-0.00566	-0.00415	-0.00227	-0.0034	-0.00944		16.1	-11.8325	-84.3841	-125.798	-180.601	-152.265	-164.409	-137.319
16.2	-4.0484	-4.39958		16.2	-4.67071	-13.078		16.2	-0.0068	-0.00491	-0.00453	-0.00793	-0.00529	-0.00453	-0.00415	-0.0034		16.2	-11.8325	-83.1386	-126.732	-182.469	-151.954	-160.984	-140.433
16.3	-3.97457	-4.3448		16.3	-4.04795	-14.0121		16.3	-0.00944	-0.00491	-0.00604	-0.00264	-0.00566	-0.00566	-0.00264	-0.00529		16.3	-15.2577	-88.4321	-128.289	-178.11	-146.349	-160.984	-133.894
16.4	-3.83856	-4.2509		16.4	-4.67071	-9.03004		16.4	-0.00906	-0.00793	-0.00227	-0.00491	-0.00491	-0.00604	-0.00604	-0.00566		16.4	-13.7007	-88.7435	-128.6	-177.176	-146.972	-160.05	-129.223
16.5	-3.79582	-4.17852		16.5	-7.78452	-13.3894		16.5	-0.0102	-0.00831	-0.00642	-0.00415	-0.0034	-0.00755	-0.0034	-0.00604		16.5	-17.1259	-87.498	-123.618	-179.044	-142.924	-154.133	-127.666
16.6	-3.7997	-4.1081		16.6	-7.78452	-13.3894		16.6	-0.01208	-0.00302	-0.00604	-0.00453	-0.00604	-0.00642	-0.00151	-0.00566		16.6	-16.5032	-91.8573	-122.995	-176.553	-140.433	-149.774	-127.355
16.7	-3.78027	-4.05528		16.7	-4.98209	-15.2577		16.7	-0.00869	-0.00378	-0.00604	-0.00566	-0.00264	-0.00604	-0.00189	-0.00793		16.7	-13.3894	-89.989	-124.864	-175.93	-138.876	-144.481	-130.468
16.8	-3.6909	-3.95942		16.8	-6.22761	-11.8325		16.8	-0.00944	-0.00415	-0.00566	-0.00642	-0.00264	-0.00604	-0.00227	-0.00566		16.8	-10.8983	-78.7793	-121.127	-166.277	-134.828	-140.121	-131.403
16.9	-3.65204	-3.85182		16.9	-6.22761	-16.1918		16.9	-0.01095	-0.00642	-0.00378	-0.00453	-0.00264	-0.00453	-0.00415	-0.00227		16.9	-11.5211	-87.8093	-115.211	-165.654	-136.696	-138.564	-129.534
17	-3.64815	-3.7501		17	-3.11381	-12.4552		17	-0.01057	-0.00831	-0.00529	-0.00566	-0.00378	-0.00869	-0.00189	-0.00378		17	-10.5869	-89.3662	-112.72	-159.427	-140.433	-139.187	-135.762
17.1	-3.60152	-3.66989		17.1	-5.60485	-18.9942		17.1	-0.00869	-0.00491	-0.00642	-0.00227	-0.00415	-0.00453	-0.00491	-0.00642		17.1	-9.34142	-85.6297	-108.983	-166.277	-146.972	-140.744	-132.025
17.2	-3.58209	-3.6112		17.2	-6.85037	-15.2577		17.2	-0.01133	-0.00415	-0.00415	-0.00227	-0.00529	-0.00869	-0.00378	-0.00113		17.2	-8.71866	-87.498	-112.72	-156.936	-148.529	-139.499	-125.486
17.3	-3.54712	-3.54469		17.3	-5.29347	-11.8325		17.3	-0.00944	-0.00869	-0.00793	-0.00566	-0.00566	-0.00642	-0.00415	-0.00529		17.3	-10.8983	-88.1207	-110.229	-152.265	-139.499	-139.499	-123.618
17.4	-3.51214	-3.45861		17.4	-4.67071	-10.5869		17.4	-0.01246	-0.00793	-0.00566	-0.00453	-0.00302	-0.00566	-0.00302	-0.00566		17.4	-12.1438	-87.1866	-109.917	-152.577	-132.025	-138.564	-120.504
17.5	-3.45774	-3.36862		17.5	-6.53899	-15.569		17.5	-0.0102	-0.00453	-0.0034	-0.00793	0	-0.00566	-0.00227	-0.00869		17.5	-12.7666	-86.5638	-113.654	-154.445	-133.582	-139.187	-119.57
17.6	-3.34116	-3.26494		17.6	-5.60485	-13.7007		17.6	-0.00982	-0.00453	-0.00566	-0.00415	-0.00227	-0.00642	-0.0034	-0.00604		17.6	-10.2756	-84.6955	-122.684	-158.804	-132.025	-135.139	-116.145
17.7	-3.28676	-3.15343		17.7	-6.53899	-11.8325		17.7	-0.01246	-0.00869	-0.00642	-0.00906	-0.00566	-0.0068	-0.00227	-0.00529		17.7	-11.2097	-82.8272	-114.277	-147.594	-128.912	-141.055	-115.211
17.8	-3.26344	-3.07322		17.8	-4.67071	-14.0121		17.8	-0.00642	-0.00529	-0.0068	-0.00529	-0.00378	-0.00529	-0.00264	-0.00906		17.8	-11.5211	-85.3183	-111.163	-144.792	-128.289	-136.073	-109.295
17.9	-3.13132	-2.98519		17.9	-2.80243	-11.5211		17.9	-0.00944	-0.00453	-0.00453	-0.00453	-0.00264	-0.00227	-0.00189	-0.0034		17.9	-7.47313	-79.7134	-113.343	-146.038	-126.732	-126.109	-108.983
18	-3.0808	-2.8776		18	-6.85037	-13.7007		18	-0.00982	-0.0068	-0.00793	-0.00453	-0.0034	-0.00415	-0.00566	-0.00604		18	-7.16175	-79.0907	-112.097	-145.726	-124.241	-129.534	-108.983
18.1	-3.04972	-2.77		18.1	-6.85037	-15.569		18.1	-0.00604	-0.00755	-0.00415	-0.00566	-0.00302	-0.00529	-0.00604	-0.0068		18.1	-9.6528	-80.0248	-113.031	-141.678	-127.977	-127.043	-104.001
18.2	-2.95645	-2.6761		18.2	-7.47313	-16.1918		18.2	-0.01171	-0.00755	-0.00491	-0.00604	-0.00227	-0.00566	-0.00227	-0.00415		18.2	-10.2756	-76.911	-106.804	-138.876	-129.534	-126.109	-104.935
18.3	-2.96811	-2.5685		18.3	-8.40728	-11.8325		18.3	-0.0102	-0.00529	-0.00302	-0.00453	-0.00189	-0.00793	-0.00529	-0.0068		18.3	-9.34142	-76.2883	-108.049	-140.121	-127.977	-119.57	-104.001
18.4	-2.97977	-2.47265		18.4	-5.60485	-11.2097		18.4	-0.00982	-0.00755	-0.00755	-0.00755	-0.00491	-0.00831	-0.0034	-0.00264		18.4	-9.96418	-79.7134	-113.654	-140.433	-124.864	-115.522	-102.133
18.5	-2.87873	-2.39831		18.5	-4.04795	-10.5869		18.5	-0.01284	-0.00642	-0.00302	-0.00227	-0.00453	-0.00491	-0.000755	-0.00831		18.5	-10.8983	-81.5817	-113.343	-138.876	-122.995	-120.193	-98.3963
18.6	-2.81656	-2.32201		18.6	-4.35933	-10.5869		18.6	-0.01057	-0.00566	-0.00491	-0.0034	-0.00491	-0.0034	-0.00227	-0.00831		18.6	-9.6528	-84.0728	-113.654	-132.96	-119.57	-118.636	-97.4621
18.7	-2.75827	-2.25354		18.7	-4.98209	-14.9463		18.7	-0.00906	-0.00604	-0.00227	-0.00755	-0.00378	-0.00566	-0.00151	-0.00529		18.7	-9.96418	-86.8752	-118.013	-130.468	-116.145	-113.965	-93.1028
18.8	-2.71164	-2.14595		18.8	-6.53899	-12.7666		18.8	-0.01095	-0.00718	-0.00793	-0.00642	-0.00189	-0.0068	-0.00415	-0.00378		18.8	-9.34142	-89.6776	-123.618	-124.241	-108.36	-116.768	-97.1508
18.9	-2.68444	-2.099		18.9	-6.22761	-14.9463		18.9	-0.01057	-0.00529	-0.00604	-0.00491	0	-0.00529	0.000378	-0.00189		18.9	-8.40728	-89.6776	-122.061	-130.157	-110.852	-118.947	-100.887
19	-2.60283	-2.05987		19	-4.04795	-12.4552		19	-0.0136	-0.00793	-0.00491	-0.00264	-0.00491	-0.00831	-0.00302	-0.00604		19	-8.40728	-86.2524	-116.768	-128.6	-107.115	-119.57	-92.7914
19.1	-2.57563	-1.96402		19.1	-2.80243	-16.5032		19.1	-0.01322	-0.0034	-0.00566	-0.0034	-0.00189	-0.00302	-0.00642	-0.00491		19.1	-8.40728	-87.1866	-115.522	-121.438	-111.786	-125.798	-93.7256
19.2	-2.48237	-1.90924		19.2	-4.04795	-10.2756		19.2	-0.01208	-0.0068	-0.0034	-0.00831	-0.00378	-0.00869	-0.00302	-0.00378		19.2	-5.29347	-82.8272	-117.39	-126.109	-116.456	-122.061	-86.8752
19.3	-2.43574	-1.86033		19.3	-6.53899	-8.40728		19.3	-0.01095	-0.00869	-0.00415	-0.00755	-0.00189	-0.00566	-0.00264	-0.00642		19.3	-8.71866	-81.5817	-120.816	-122.995	-117.39	-118.947	-87.8093
19.4	-2.42797	-1.81534		19.4	-8.0959	-12.7666		19.4	-0.01208	-0.00755	-0.00453	-0.00529	0	-0.00604	-0.00227	-0.00642		19.4	-9.34142	-80.3362	-113.031	-119.57	-112.408	-118.325	-86.2524
19.5	-2.24144	-1.78599		19.5	-8.40728	-9.34142		19.5	-0.01284	-0.00906	-0.00189	-0.0068	-0.00227	-0.00604	-0.00227	-0.00529		19.5	-8.0959	-77.2224	-109.606	-119.57	-116.456	-115.522	-84.6955
19.6	-2.10932	-1.72144		19.6	-6.53899	-8.71866		19.6	-0.01208	-0.00642	-0.00566	-0.00415	-0.00642	-0.00529	0.000755	-0.00415		19.6	-8.40728	-78.7793	-114.899	-121.438	-114.277	-114.277	-85.3183
19.7	-2.15984	-1.6471		19.7	-3.42519	-12.1438		19.7	-0.01171	-0.00869	-0.00415	-0.00302	-0.00453	-0.00604	-0.00264	-0.00718		19.7	-11.5211	-76.5996	-121.127	-119.882	-111.474	-113.031	-92.7914
19.8	-2.17926	-1.58254		19.8	-6.22761	-13.7007		19.8	-0.0136	-0.00755	-0.00604	-0.00227	-0.00113	-0.00604	-0.00227	-0.00718		19.8	-8.0959	-71.9289	-128.6	-126.421	-108.672	-104.935	-88.1207
19.9	-2.06657	-1.51798		19.9	-8.40728	-12.4552		19.9	-0.01737	-0.00718	-0.00378	-0.00604	-0.00491	-0.0068	-0.00189	-0.00642		19.9	-7.47313	-73.7972	-120.193	-116.145	-110.229	-101.199	-89.6776
20	-1.99663	-1.47495		20	-8.40728	-13.3894		20	-0.00982	-0.00869	-0.00642	-0.00793	-0.0034	-0.00491	-0.00302	-0.0034		20	-6.85037	-70.9948	-109.917	-111.163	-108.049	-104.001	-85.9411
20.1	-2.00051	-1.42213		20.1	-8.0959	-11.2097		20.1	-0.01511	-0.0068	-0.0068	-0.00793	-0.00264	-0.00264	-0.00415	-0.00604		20.1	-9.96418	-77.8452	-107.738	-110.852	-103.69	-100.265	-83.1386
20.2	-1.96942	-1.36148		20.2	-7.78452	-9.03004		20.2	-0.01624	-0.00642	-0.00378	-0.00755	-0.00189	-0.00415	-0.00264	-0.00529		20.2	-10.2756	-87.8093	-102.444	-106.181	-96.528	-102.444	-82.8272
20.3	-1.84119	-1.34388		20.3	-6.22761	-10.5869		20.3	-0.01133	-0.01057	-0.00529	-0.00604	-0.000378	-0.00604	-0.00189	-0.00415		20.3	-11.2097	-87.1866	-100.887	-110.229	-94.6597	-105.247	-74.7314
20.4	-1.83342	-1.25193		20.4	-3.42519	-15.569		20.4	-0.00982	-0.0068	-0.00453	-0.00378	0.00113	-0.00793	-0.00227	-0.00415		20.4	-11.2097	-84.6955	-96.528	-104.935	-99.9532	-102.756	-78.4679
20.5	-1.80233	-1.20889		20.5	-9.6528	-14.0121		20.5	-0.01171	-0.00718	-0.0068	-0.00755	-0.00415	-0.00453	-0.00378	-0.00566		20.5	-10.5869	-88.4321	-96.528	-106.492	-101.51	-109.295	-84.0728
20.6	-1.74793	-1.17564		20.6	-12.4552	-13.3894		20.6	-0.0102	-0.00869	-0.00529	-0.00869	-0.00227	-0.00453	-0.00264	-0.00491		20.6	-13.078	-89.6776	-93.4142	-101.51	-100.576	-113.343	-87.498
20.7	-1.71295	-1.17172		20.7	-13.078	-10.5869		20.7	-0.00944	-0.00831	-0.00264	-0.00642	-0.0034	-0.00906	-0.00264	-0.00415		20.7	-13.7007	-85.6297	-89.989	-98.0849	-101.199	-107.115	-86.8752
20.8	-1.71295	-1.1189		20.8	-13.3894	-13.3894		20.8	-0.0136	-0.00604	-0.00264	-0.0068	-0.00189	-0.0034	-0.00189	-0.00302		20.8	-14.9463	-83.45	-83.7614	-94.6597	-99.019	-104.935	-91.2345
20.9	-1.68964	-1.07391		20.9	-19.617	-9.96418		20.9	-0.00869	-0.00529	-0.0034	-0.00264	-0.0034	-0.0068	-0.00529	-0.00718		20.9	-17.1259	-85.0069	-78.7793	-96.528	-99.019	-105.247	-86.8752
21	-1.69741	-0.99957		21	-21.1739	-13.078		21	-0.00831	-0.00906	-0.00529	-0.00718	0	-0.00378	-0.00113	-0.0068		21	-14.3235	-79.4021	-78.7793	-96.8394	-102.444	-103.378	-83.45
21.1	-1.67798	-0.95458		21.1	-20.5511	-11.8325		21.1	-0.01133	-0.00869	-0.00566	-0.00604	-0.00189	-0.00604	-0.00453	-0.00491		21.1	-14.9463	-83.45	-81.2703	-97.7735	-103.69	-95.2825	-81.8931
21.2	-1.61969	-0.91741		21.2	-27.0901	-13.078		21.2	-0.00869	-0.00982	-0.000378	-0.00718	-0.000378	-0.00755	0	-0.0034		21.2	-14.3235	-80.959	-82.8272	-98.7077	-99.019	-94.3483	-77.2224
21.3	-1.53808	-0.86459		21.3	-33.6291	-14.6349		21.3	-0.00944	-0.00566	-0.00151	-0.00869	-0.0034	-0.00302	-0.0034	-0.00529		21.3	-17.4373	-86.2524	-75.9769	-97.4621	-97.1508	-91.8573	-78.7793
21.4	-1.507	-0.79612		21.4	-39.234	-14.6349		21.4	-0.01246	-0.00491	-0.00453	-0.00491	-0.00264	-0.00642	-0.00264	-0.00529		21.4	-14.9463	-89.6776	-78.4679	-100.265	-97.4621	-90.3004	-80.3362
21.5	-1.51865	-0.7746		21.5	-41.725	-11.2097		21.5	-0.01133	-0.00982	-0.00453	-0.00604	-0.00604	-0.0068	-0.00264	-0.00378		21.5	-16.5032	-88.1207	-80.0248	-98.3963	-94.0369	-84.3841	-80.959
21.6	-1.50311	-0.7433		21.6	-42.3478	-5.60485		21.6	-0.01208	-0.00453	-0.00566	-0.00642	-0.00415	-0.00378	-0.00378	-0.00453		21.6	-16.1918	-82.2045	-76.5996	-101.51	-94.0369	-87.1866	-83.7614
21.7	-1.46037	-0.70613		21.7	-48.5754	-13.7007		21.7	-0.00831	-0.0068	-0.00264	-0.0068	-0.00227	-0.00415	-0.00113	-0.00566		21.7	-14.9463	-81.2703	-75.3541	-102.756	-91.8573	-85.6297	-82.5159
21.8	-1.46037	-0.69439		21.8	-45.773	-14.9463		21.8	-0.00982	-0.00831	-0.00302	-0.0068	-0.00189	-0.00566	0	-0.00302		21.8	-15.569	-77.8452	-75.6655	-102.444	-87.8093	-84.6955	-86.2524
21.9	-1.37099	-0.67092		21.9	-53.2461	-15.569		21.9	-0.01171	-0.00718	-0.00189	-0.00755	-0.000755	-0.0068	-0.00227	-0.00453		21.9	-14.0121	-76.5996	-72.2403	-104.935	-91.5459	-84.6955	-91.5459
22	-1.30104	-0.66113		22	-62.5875	-13.3894		22	-0.00793	-0.00982	-0.00566	-0.00566	-0.00264	-0.00378	-0.0034	-0.00264		22	-16.8146	-76.2883	-74.42	-111.163	-89.989	-93.4142	-82.5159
22.1	-1.28938	-0.63766		22.1	-67.5696	-11.8325		22.1	-0.00869	-0.00906	-0.00302	-0.00529	-0.00151	-0.00302	-0.00529	-0.0034		22.1	-15.2577	-79.0907	-69.4379	-108.672	-91.8573	-93.1028	-80.3362
22.2	-1.28161	-0.62005		22.2	-77.2224	-22.7308		22.2	-0.01284	-0.00529	-0.00264	-0.00982	-0.00378	-0.00529	-0.00302	-0.00491		22.2	-13.078	-82.5159	-66.0127	-112.097	-89.3662	-92.1687	-85.3183
22.3	-1.29716	-0.57115		22.3	-87.498	-28.3356		22.3	-0.00906	-0.00793	-0.000755	-0.00491	-0.00227	-0.00604	-0.0034	-0.00566		22.3	-13.078	-82.5159	-66.9468	-106.804	-87.1866	-89.3662	-80.0248
22.4	-1.27384	-0.53593		22.4	-99.019	-31.1381		22.4	-0.01133	-0.00566	-0.00415	-0.0034	-0.0034	-0.00415	-0.00113	-0.00566		22.4	-12.1438	-84.3841	-66.6355	-113.343	-87.498	-93.1028	-84.6955
22.5	-1.26218	-0.48703		22.5	-102.444	-35.4974		22.5	-0.01057	-0.00755	-0.00491	-0.00793	-0.00227	-0.00415	-0.00189	-0.00491		22.5	-12.1438	-88.4321	-70.6834	-105.869	-85.9411	-88.1207	-86.2524
22.6	-1.26995	-0.45964		22.6	-104.624	-51.6892		22.6	-0.00944	-0.00944	-0.00453	-0.01057	-0.00378	-0.00566	-0.00151	-0.00264		22.6	-13.3894	-87.498	-72.2403	-100.887	-83.45	-91.8573	-81.2703
22.7	-1.26218	-0.40095		22.7	-108.983	-76.5996		22.7	-0.00831	-0.0068	-0.00415	-0.00453	0	-0.00302	-0.00113	-0.00378		22.7	-12.7666	-91.5459	-67.2582	-106.492	-85.6297	-91.8573	-79.4021
22.8	-1.22721	-0.37747		22.8	-118.636	-103.378		22.8	-0.01095	-0.00869	-0.00227	-0.0068	-0.00227	-0.00604	-0.0034	-0.0034		22.8	-12.4552	-85.0069	-65.3899	-107.115	-81.2703	-95.2825	-80.6476
22.9	-1.19224	-0.36574		22.9	-126.421	-143.546		22.9	-0.01284	-0.0102	-0.00642	-0.0068	-0.00264	-0.00491	-0.00604	-0.00378		22.9	-12.4552	-74.1086	-57.294	-107.115	-81.2703	-93.1028	-83.7614
23	-1.20389	-0.34422		23	-136.696	-199.906		23	-0.00755	-0.00642	-0.00604	-0.00793	-0.00227	-0.0034	-0.000755	-0.00378		23	-14.0121	-74.7314	-58.2282	-108.36	-80.6476	-97.1508	-78.1565
23.1	-1.19612	-0.34813		23.1	-141.367	-260.626		23.1	-0.00982	-0.00831	-0.0034	-0.00906	-0.00264	-0.00642	-0.00264	-0.00415		23.1	-14.0121	-73.7972	-53.8688	-107.738	-81.2703	-94.3483	-84.0728
23.2	-1.14949	-0.32857		23.2	-151.954	-326.327		23.2	-0.01095	-0.00793	0.00151	-0.0068	-0.00491	-0.00453	-0.00227	-0.00529		23.2	-14.9463	-74.42	-55.1144	-113.343	-80.0248	-93.1028	-89.6776
23.3	-1.0912	-0.31879		23.3	-160.05	-418.496		23.3	-0.01133	-0.00642	-0.0034	-0.00755	-0.00302	-0.00453	-0.00415	-0.00189		23.3	-12.7666	-72.5517	-53.8688	-119.57	-85.9411	-89.989	-88.4321
23.4	-1.06011	-0.32466		23.4	-164.098	-515.646		23.4	-0.00944	-0.00642	-0.00415	-0.00529	-0.00227	-0.00302	-0.00415	-0.00453		23.4	-12.4552	-69.1265	-58.2282	-112.408	-83.45	-94.6597	-93.7256
23.5	-1.01348	-0.2914		23.5	-172.193	-609.995		23.5	-0.0068	-0.00793	-0.00264	-0.0068	-0.00529	-0.00604	-0.00264	-0.00415		23.5	-11.8325	-68.1924	-61.342	-114.899	-89.3662	-99.019	-93.1028
23.6	-0.93965	-0.27966		23.6	-177.487	-702.786		23.6	-0.01133	-0.00793	-0.00227	-0.01095	-0.00302	-0.00604	-0.00378	-0.00491		23.6	-13.078	-66.9468	-57.6054	-119.259	-85.0069	-99.6418	-87.498
23.7	-0.97074	-0.26988		23.7	-179.355	-799.625		23.7	-0.00755	-0.00755	-0.0034	-0.0102	-0.0034	-0.00415	-0.0034	-0.00453		23.7	-12.4552	-67.881	-57.9168	-117.39	-83.7614	-93.4142	-93.1028
23.8	-0.8969	-0.25619		23.8	-187.14	-878.716		23.8	-0.0068	-0.01057	-0.00227	-0.00755	-0.00264	-0.00415	-0.00302	-0.00604		23.8	-9.34142	-73.7972	-52.9347	-117.079	-85.9411	-89.3662	-93.4142
23.9	-0.8425	-0.26597		23.9	-188.074	-964.969		23.9	-0.01057	-0.00869	-0.00453	-0.00604	-0.00491	-0.00378	-0.00453	-0.00227		23.9	-9.03004	-67.881	-49.1981	-117.702	-90.6118	-85.3183	-84.3841
24	-0.84639	-0.23467		24	-193.679	-1071.77		24	-0.0068	-0.00604	-0.00491	-0.00944	-0.00415	-0.00415	-0.00566	-0.00491		24	-9.03004	-61.342	-52.3119	-120.504	-90.3004	-91.2345	-77.8452
24.1	-0.75701	-0.23075		24.1	-201.775	-1148.68		24.1	-0.00869	-0.00566	-0.0034	-0.00906	-0.00529	-0.00415	-0.00227	-0.00491		24.1	-8.0959	-57.294	-50.755	-120.504	-94.0369	-81.8931	-79.0907
24.2	-0.74924	-0.18967		24.2	-221.08	-1231.82		24.2	-0.00982	-0.0102	-0.00529	-0.00491	-0.00453	-0.00378	-0.00453	-0.00415		24.2	-8.71866	-52.6233	-49.8209	-117.39	-90.3004	-81.2703	-74.7314
24.3	-0.78421	-0.1662		24.3	-229.488	-1314.34		24.3	-0.01057	-0.00831	-0.00227	-0.00491	-0.00453	-0.0034	-0.0034	-0.00227		24.3	-7.78452	-59.1623	-52.0006	-112.408	-93.7256	-82.2045	-74.7314
24.4	-0.70261	-0.14077		24.4	-225.44	-1394.05		24.4	-0.00944	-0.00793	-0.00189	-0.00869	-0.00151	-0.00302	-0.00415	-0.00227		24.4	-7.47313	-58.8509	-54.1802	-108.049	-87.8093	-85.9411	-70.372
24.5	-0.65986	-0.1036		24.5	-223.26	-1468.16		24.5	-0.00906	-0.00831	-0.00302	-0.00793	-0.00718	-0.00529	-0.00415	-0.00264		24.5	-7.16175	-57.294	-51.0664	-112.72	-87.8093	-88.7435	-73.4858
24.6	-0.72592	-0.09381		24.6	-226.062	-1526.08		24.6	-0.01095	-0.00831	-0.00529	-0.00982	-0.00227	-0.00415	-0.00227	-0.00718		24.6	-7.47313	-60.7192	-54.803	-110.852	-87.8093	-93.4142	-72.5517
24.7	-0.68706	-0.09773		24.7	-231.356	-1574.65		24.7	-0.0068	-0.01057	-0.00529	-0.00982	-0.00604	-0.00453	-0.00189	-0.00378		24.7	-8.71866	-59.1623	-57.294	-111.163	-83.1386	-88.7435	-68.5037
24.8	-0.65209	-0.06251		24.8	-244.434	-1622.92		24.8	-0.00491	-0.00378	-0.00189	-0.00529	-0.00491	-0.00453	-0.00566	-0.00453		24.8	-10.5869	-57.6054	-55.1144	-105.869	-85.9411	-92.48	-65.7013
24.9	-0.62877	-0.03904		24.9	-254.087	-1651.25		24.9	-0.0102	-0.00755	-0.00378	-0.00944	-0.00227	-0.00642	-0.00302	-0.00189		24.9	-9.6528	-58.5396	-62.2761	-104.313	-89.6776	-87.498	-73.4858
25	-0.62877	-0.04099		25	-259.069	-1652.5		25	-0.00944	-0.0068	-0.00453	-0.01095	-0.00529	-0.0068	-0.0034	-0.0034		25	-8.0959	-56.9827	-58.5396	-111.786	-89.6776	-86.5638	-76.2883
25.1	-0.60157	-0.03904		25.1	-260.314	-1672.11		25.1	-0.00944	-0.00378	-0.00302	-0.01171	-0.00302	-0.00264	-0.00529	-0.00189		25.1	-7.47313	-59.4737	-53.2461	-111.786	-91.8573	-88.1207	-77.8452
25.2	-0.61712	8.7e-05		25.2	-268.099	-1686.44		25.2	-0.00944	-0.00831	-0.00378	-0.0068	-0.00529	-0.000755	-0.00566	-0.00604		25.2	-10.2756	-55.7371	-52.6233	-110.852	-94.3483	-87.1866	-80.959
25.3	-0.67929	-0.00187		25.3	-280.865	-1694.84		25.3	-0.01095	-0.0102	-0.00378	-0.01133	-0.00415	-0.00604	-0.00604	-0.00529		25.3	-8.40728	-53.2461	-53.2461	-102.756	-85.0069	-81.2703	-82.2045
25.4	-0.60157	0.002043		25.4	-281.488	-1687.68		25.4	-0.00869	-0.00718	-0.00227	-0.00982	-0.00491	-0.00264	-0.00151	-0.00453		25.4	-6.85037	-60.0965	-49.5095	-103.69	-85.3183	-80.3362	-82.8272
25.5	-0.57048	0.011825		25.5	-279.931	-1668.38		25.5	-0.00755	-0.00718	-0.00529	-0.00831	-0.00566	0.000378	-0.0034	-0.00227		25.5	-7.47313	-59.4737	-55.4258	-99.3304	-88.4321	-82.2045	-84.6955
25.6	-0.48499	-0.00383		25.6	-280.554	-1667.75		25.6	-0.00906	-0.00529	-0.0034	-0.0102	-0.00755	-0.00264	-0.00453	-0.000378		25.6	-5.29347	-58.5396	-57.294	-99.9532	-83.45	-79.4021	-87.8093
25.7	-0.47334	0.017693		25.7	-286.782	-1678.34		25.7	-0.01171	-0.00793	-0.00227	-0.00415	-0.00302	-0.00302	-0.00529	-0.00604		25.7	-5.29347	-59.4737	-58.8509	-104.001	-86.8752	-81.8931	-92.48
25.8	-0.52385	0.027475		25.8	-284.602	-1702.01		25.8	-0.00415	-0.00982	-0.00453	-0.00604	-0.00491	-0.00227	-0.00378	-0.00491		25.8	-5.60485	-63.833	-53.8688	-102.133	-82.8272	-83.7614	-87.8093
25.9	-0.53551	0.01965		25.9	-282.111	-1714.15		25.9	-0.00566	-0.00453	0.000378	-0.00642	-0.00378	-0.00302	-0.00227	-0.00302		25.9	-9.03004	-58.5396	-52.0006	-98.7077	-77.8452	-80.0248	-91.5459
26	-0.50442	0.045081		26	-286.159	-1705.74		26	-0.00982	-0.00529	-0.00491	-0.00642	-0.00529	-0.00529	-0.00604	-0.00264		26	-9.03004	-55.1144	-52.3119	-105.247	-75.3541	-85.3183	-94.3483
26.1	-0.48111	0.047038		26.1	-284.602	-1703.56		26.1	-0.00944	-0.00755	-0.00415	-0.01171	-0.00378	-0.00642	-0.00566	-0.00302		26.1	-7.16175	-56.3599	-55.1144	-107.426	-78.4679	-85.9411	-87.8093
26.2	-0.41505	0.041169		26.2	-283.045	-1676.47		26.2	-0.00869	-0.00718	-0.0034	-0.01057	-0.00491	-0.00491	-0.0034	-0.0034		26.2	-6.22761	-59.4737	-60.4078	-109.917	-81.8931	-86.2524	-88.4321
26.3	-0.45779	0.043125		26.3	-285.847	-1666.2		26.3	-0.0102	-0.00718	-0.0034	-0.0102	-0.00642	-0.00378	-0.00604	-0.00566		26.3	-7.47313	-58.5396	-57.9168	-98.3963	-79.4021	-83.7614	-87.8093
26.4	-0.43836	0.052906		26.4	-297.991	-1665.26		26.4	-0.00869	-0.00529	-0.00755	-0.00831	-0.00227	-0.00491	-0.00604	-0.00151		26.4	-10.2756	-60.7192	-56.6713	-96.2166	-85.0069	-84.0728	-84.0728
26.5	-0.40339	0.064644		26.5	-307.021	-1650.63		26.5	-0.00642	-0.00755	-0.00491	-0.00906	-0.00604	-0.0034	-0.00302	-0.00491		26.5	-6.85037	-58.2282	-56.3599	-93.1028	-84.3841	-77.2224	-84.3841
26.6	-0.3179	0.088119		26.6	-304.53	-1651.87		26.6	-0.00793	-0.00755	-0.00529	-0.00982	-0.0034	0	-0.00604	-0.00302		26.6	-6.85037	-53.8688	-51.6892	-100.887	-84.3841	-79.0907	-85.0069
26.7	-0.33733	0.058775		26.7	-304.53	-1648.76		26.7	-0.00869	-0.0068	-0.00529	-0.00906	-0.00566	-0.000378	-0.00566	0		26.7	-8.0959	-55.4258	-52.6233	-105.558	-82.8272	-82.8272	-83.7614
26.8	-0.34899	0.076382		26.8	-311.692	-1621.98		26.8	-0.00982	-0.00793	0.00113	-0.00529	-0.00415	-0.00227	-0.00604	-0.00264		26.8	-9.03004	-52.0006	-48.264	-104.935	-86.8752	-79.0907	-81.8931
26.9	-0.27904	0.082251		26.9	-310.758	-1608.59		26.9	-0.0068	-0.00453	-0.0068	-0.01133	-0.00415	-0.00302	-0.00151	-0.00415		26.9	-10.5869	-53.5575	-49.5095	-98.3963	-91.8573	-76.5996	-83.45
27	-0.27904	0.088119		27	-311.069	-1587.11		27	-0.00906	-0.00566	-0.00453	-0.00906	-0.00793	-0.0034	-0.00491	-0.00453		27	-8.0959	-51.3778	-50.755	-98.7077	-99.3304	-80.0248	-83.45
27.1	-0.25961	0.093988		27.1	-314.183	-1573.72		27.1	-0.00604	-0.00831	-0.00453	-0.0102	-0.00378	-0.00642	-0.00604	-0.00491		27.1	-8.40728	-50.4437	-55.7371	-98.3963	-94.6597	-80.959	-83.7614
27.2	-0.29458	0.093988		27.2	-313.56	-1567.8		27.2	-0.00718	-0.00642	-0.00415	-0.00944	-0.00453	-0.000755	-0.0034	-0.00642		27.2	-8.71866	-51.0664	-57.9168	-93.4142	-97.1508	-81.5817	-85.9411
27.3	-0.36842	0.131157		27.3	-314.494	-1547.25		27.3	-0.00793	-0.00529	-0.00378	-0.00793	-0.00453	-0.00227	-0.00453	-0.00302		27.3	-8.40728	-52.3119	-51.6892	-92.1687	-94.9711	-77.8452	-82.2045
27.4	-0.35287	0.138983		27.4	-316.051	-1516.73		27.4	-0.0068	-0.00491	-0.00529	-0.00982	-0.00566	-0.00831	-0.00529	0		27.4	-9.03004	-56.9827	-47.6412	-94.0369	-91.8573	-82.8272	-78.4679
27.5	-0.34899	0.137026		27.5	-324.459	-1508.95		27.5	-0.00944	-0.0068	-0.00642	-0.0102	-0.00642	-0.000378	-0.00378	-0.00302		27.5	-7.47313	-53.8688	-46.0843	-100.265	-94.9711	-78.4679	-80.0248
27.6	-0.33344	0.158545		27.6	-326.327	-1494.94		27.6	-0.00755	-0.00604	-0.00264	-0.00566	-0.00793	-0.00453	-0.00604	-0.00189		27.6	-8.0959	-54.803	-41.1022	-97.4621	-98.7077	-81.5817	-80.959
27.7	-0.33733	0.156589		27.7	-326.95	-1484.35		27.7	-0.00755	-0.00718	-0.00151	-0.00604	-0.00566	-0.00227	-0.0068	-0.00227		27.7	-5.29347	-56.6713	-41.4136	-102.444	-98.3963	-82.2045	-80.959
27.8	-0.25961	0.144851		27.8	-325.393	-1484.04		27.8	-0.00831	-0.00642	-0.00604	-0.01284	-0.00529	-0.00566	-0.00378	-0.00227		27.8	-8.71866	-56.0485	-41.725	-98.3963	-96.528	-85.0069	-79.0907
27.9	-0.32956	0.137026		27.9	-327.572	-1475.94		27.9	-0.00944	-0.00453	-0.000378	-0.00718	-0.00529	-0.00453	-0.00378	-0.00453		27.9	-6.53899	-55.4258	-43.9047	-103.378	-98.3963	-76.911	-71.6175
28	-0.23241	0.140939		28	-330.686	-1468.78		28	-0.00906	-0.00793	-0.00453	-0.00982	-0.00529	-0.00415	-0.00227	-0.00453		28	-6.53899	-56.3599	-46.3957	-101.199	-98.0849	-71.6175	-72.2403
28.1	-0.26738	0.137026		28.1	-331.62	-1455.08		28.1	-0.00982	-0.0068	-0.00755	-0.00982	-0.00453	-0.000755	-0.00566	0.000755		28.1	-7.47313	-57.294	-48.8868	-102.444	-91.2345	-74.1086	-68.5037
28.2	-0.27904	0.148764		28.2	-333.8	-1437.64		28.2	-0.0102	-0.00793	-0.00491	-0.00642	-0.00604	-0.00415	-0.00529	-0.00151		28.2	-7.16175	-55.1144	-47.3299	-104.624	-96.2166	-77.5338	-67.881
28.3	-0.24018	0.156589		28.3	-338.471	-1434.84		28.3	-0.00604	-0.00566	-0.00491	-0.00982	-0.0068	-0.00189	-0.000378	-0.00151		28.3	-8.0959	-49.8209	-49.1981	-104.624	-97.7735	-79.4021	-68.5037
28.4	-0.25961	0.16637		28.4	-338.471	-1425.19		28.4	-0.00529	-0.00453	-0.00189	-0.00944	-0.00415	-0.00302	-0.00415	-0.00264		28.4	-8.0959	-52.0006	-47.6412	-108.983	-92.1687	-78.1565	-75.0427
28.5	-0.21298	0.16637		28.5	-346.567	-1427.37		28.5	-0.00755	-0.00566	-0.00566	-0.00793	-0.00755	-0.00491	-0.00604	-0.00264		28.5	-6.22761	-47.3299	-47.9526	-103.69	-89.3662	-75.0427	-78.7793
28.6	-0.16635	0.144851		28.6	-351.549	-1413.36		28.6	-0.00755	-0.0068	-0.00378	-0.00944	-0.0068	-0.00227	-0.00604	-0.00453		28.6	-8.71866	-49.1981	-52.6233	-104.935	-87.498	-74.42	-80.0248
28.7	-0.18189	0.164414		28.7	-357.776	-1397.16		28.7	-0.00566	-0.00831	-0.00604	-0.00793	-0.00529	-0.0034	-0.00642	-0.00378		28.7	-6.22761	-55.4258	-51.3778	-102.133	-83.45	-75.0427	-81.2703
28.8	-0.1236	0.156589		28.8	-357.465	-1373.5		28.8	-0.00831	-0.00453	-0.00529	-0.00869	-0.00793	-0.00491	-0.00642	-0.00453		28.8	-6.85037	-54.803	-56.3599	-98.3963	-85.3183	-71.6175	-81.5817
28.9	-0.13137	0.117464		28.9	-356.219	-1359.18		28.9	-0.00755	-0.00415	-0.0034	-0.01095	-0.00566	-0.00415	-0.00755	-0.00189		28.9	-7.47313	-45.1502	-57.294	-97.1508	-83.7614	-72.5517	-82.2045
29	-0.14692	0.115507		29	-356.219	-1347.34		29	-0.00604	-0.00869	-0.00529	-0.0136	-0.00604	-0.00189	-0.00642	-0.00529		29	-6.22761	-44.8388	-55.4258	-99.9532	-87.498	-76.2883	-81.5817
29.1	-0.12749	0.127245		29.1	-358.399	-1320.25		29.1	-0.00755	-0.0068	-0.00151	-0.00755	-0.00755	-0.00227	-0.0034	-0.00227		29.1	-7.78452	-48.5754	-48.264	-98.3963	-84.3841	-79.4021	-77.5338
29.2	-0.11194	0.148764		29.2	-365.249	-1301.88		29.2	-0.00793	-0.00529	-0.00529	-0.00718	-0.00453	-0.0034	-0.0034	-0.00264		29.2	-6.85037	-46.0843	-53.2461	-92.48	-84.0728	-76.5996	-78.7793
29.3	-0.11583	0.142895		29.3	-373.657	-1300.33		29.3	-0.0068	-0.00793	-0.00604	-0.00982	-0.00642	-0.000755	-0.00529	-0.00302		29.3	-7.78452	-44.8388	-56.3599	-95.2825	-85.9411	-69.7493	-76.5996
29.4	-0.178	0.142895		29.4	-365.872	-1278.84		29.4	-0.00642	-0.00453	-0.00566	-0.0068	-0.00604	-0.00566	-0.00415	-0.00302		29.4	-7.78452	-42.3478	-52.0006	-99.6418	-77.2224	-62.2761	-79.7134
29.5	-0.13137	0.152677		29.5	-362.136	-1258.6		29.5	-0.00491	-0.00453	-0.00529	-0.00831	-0.00491	-0.00264	-0.00604	-0.0034		29.5	-8.0959	-49.8209	-50.4437	-104.313	-75.6655	-61.0306	-75.3541
29.6	-0.13526	0.158545		29.6	-358.71	-1233.69		29.6	-0.00491	-0.00982	-0.00151	-0.0068	-0.00378	-0.00415	-0.0068	-0.000378		29.6	-8.71866	-49.1981	-56.6713	-104.313	-75.0427	-62.5875	-75.0427
29.7	-0.1508	0.183977		29.7	-363.07	-1214.7		29.7	-0.00869	-0.00491	-0.00415	-0.00869	-0.00604	-0.00529	-0.00491	-0.00264		29.7	-7.16175	-49.5095	-62.8989	-103.69	-75.9769	-61.342	-76.2883
29.8	-0.14692	0.16637		29.8	-365.249	-1217.81		29.8	-0.00906	-0.0068	-0.00831	-0.00755	-0.0034	-0.00302	-0.00491	-0.00529		29.8	-7.47313	-50.4437	-56.9827	-109.917	-77.5338	-60.7192	-77.8452
29.9	-0.14692	0.142895		29.9	-368.675	-1222.48		29.9	-0.0068	-0.0034	-0.00415	-0.00793	-0.00415	-0.00227	-0.00227	-0.0034		29.9	-6.22761	-49.8209	-50.1323	-108.672	-81.2703	-62.5875	-75.3541
30	-0.11194	0.127245		30	-371.166	-1219.99		30	-0.00793	-0.00491	-0.00642	-0.00718	-0.00491	-0.00566	-0.00529	-0.00189		30	-7.47313	-47.6412	-53.5575	-107.738	-82.2045	-63.833	-71.3062
30.1	-0.0692	0.142895		30.1	-373.968	-1193.83		30.1	-0.0102	-0.00944	-0.00642	-0.00793	-0.00869	-0.00491	-0.00453	-0.00113		30.1	-7.78452	-47.6412	-56.3599	-104.935	-75.9769	-62.8989	-71.9289
30.2	-0.05754	0.154633		30.2	-375.836	-1174.53		30.2	-0.00793	-0.00491	-0.00529	-0.0102	-0.00869	-0.00264	-0.00604	-0.0034		30.2	-11.2097	-43.5933	-53.2461	-106.181	-82.2045	-56.3599	-68.5037
30.3	-0.08863	0.152677		30.3	-378.327	-1158.34		30.3	-0.0068	-0.00302	-0.00378	-0.00718	-0.00604	-0.00453	-0.00529	-0.00264		30.3	-6.53899	-48.8868	-54.803	-102.756	-83.1386	-52.9347	-67.881
30.4	-0.10806	0.154633		30.4	-387.046	-1154.91		30.4	-0.00755	-0.00415	-0.00378	-0.00755	-0.00642	-0.00302	-0.00642	-0.00227		30.4	-6.22761	-48.8868	-53.8688	-99.3304	-83.7614	-64.1444	-70.9948
30.5	-0.07697	0.15072		30.5	-385.801	-1139.03		30.5	-0.00944	-0.00491	-0.0068	-0.00566	-0.00755	-0.00415	-0.00453	-0.00302		30.5	-7.47313	-48.5754	-51.0664	-96.2166	-84.0728	-64.1444	-69.4379
30.6	-0.03422	0.174196		30.6	-383.621	-1134.05		30.6	-0.00755	-0.00453	-0.00604	-0.00831	-0.00566	-0.00529	-0.00491	-0.00566		30.6	-6.85037	-46.7071	-47.6412	-103.378	-85.0069	-64.1444	-66.0127
30.7	-0.06143	0.176152		30.7	-373.034	-1110.69		30.7	-0.0068	-0.00378	-0.00453	-0.00642	-0.00982	-0.00415	-0.00604	-0.00227		30.7	-6.85037	-45.773	-48.5754	-103.378	-82.5159	-65.3899	-68.1924
30.8	-0.05365	0.174196		30.8	-373.968	-1091.08		30.8	-0.00755	-0.00604	-0.00529	-0.00755	-0.00604	-0.00566	-0.00227	-0.00302		30.8	-9.96418	-47.9526	-52.9347	-103.067	-86.5638	-65.0786	-65.3899
30.9	-0.07308	0.182021		30.9	-381.13	-1082.67		30.9	-0.00831	-0.00378	-0.00491	-0.0068	-0.00378	-0.00453	-0.00453	-0.00415		30.9	-11.8325	-47.6412	-53.2461	-100.887	-89.989	-61.342	-67.2582
31	-0.11972	0.182021		31	-376.771	-1079.25		31	-0.00718	-0.00378	-0.00491	-0.01057	-0.00944	-0.00264	-0.00491	-0.000755		31	-8.40728	-44.5274	-53.8688	-102.756	-90.9231	-61.6534	-68.5037
31.1	-0.04977	0.178108		31.1	-381.13	-1078.62		31.1	-0.00415	-0.00529	-0.00793	-0.00982	-0.01057	-0.00604	-0.00718	-0.00151		31.1	-12.4552	-52.6233	-48.8868	-100.265	-94.0369	-62.8989	-66.0127
31.2	-0.04977	0.170283		31.2	-379.262	-1060.25		31.2	-0.0068	-0.00378	-0.00491	-0.00604	-0.00642	-0.00264	-0.00869	-0.00302		31.2	-8.71866	-56.9827	-49.1981	-98.0849	-92.7914	-65.0786	-67.881
31.3	-0.03811	0.156589		31.3	-380.819	-1050.91		31.3	-0.0068	-0.00566	-0.00566	-0.00604	-0.00642	-0.0068	-0.00642	-0.00491		31.3	-9.96418	-53.2461	-47.3299	-97.7735	-89.989	-61.342	-68.8151
31.4	-0.02645	0.148764		31.4	-377.082	-1042.5		31.4	-0.00755	-0.00604	-0.0068	-0.00869	-0.00642	-0.00302	-0.00529	-0.000378		31.4	-9.34142	-56.6713	-43.5933	-97.7735	-89.3662	-66.9468	-69.7493
31.5	0.020179	0.172239		31.5	-382.375	-1028.8		31.5	-0.00982	-0.00529	-0.0068	-0.0068	-0.00453	-0.00264	-0.00529	-0.00415		31.5	-7.47313	-61.6534	-43.2819	-99.9532	-92.48	-67.2582	-58.8509
31.6	0.016293	0.180064		31.6	-392.34	-1003.89		31.6	-0.00831	-0.00793	-0.00642	-0.0068	-0.0068	-0.00529	-0.00491	-0.00415		31.6	-10.8983	-54.803	-43.2819	-99.9532	-88.1207	-66.3241	-61.0306
31.7	-0.03422	0.183977		31.7	-402.615	-992.37		31.7	-0.00604	-0.00869	-0.00453	-0.00642	-0.00793	-0.00604	-0.00453	-0.00491		31.7	-12.1438	-56.9827	-46.3957	-99.019	-84.0728	-63.2103	-66.3241
31.8	-0.00314	0.193758		31.8	-401.681	-978.981		31.8	-0.00642	-0.00642	-0.00793	-0.00755	-0.00642	-0.00755	-0.00529	-0.00491		31.8	-10.5869	-59.4737	-50.4437	-101.199	-85.9411	-63.5216	-62.5875
31.9	-0.03034	0.174196		31.9	-409.154	-970.262		31.9	-0.00906	-0.00529	-0.00793	-0.00453	-0.00755	-0.00151	-0.00378	-0.00378		31.9	-11.5211	-58.2282	-53.5575	-96.2166	-92.1687	-65.0786	-59.1623
32	-0.042	0.183977		32	-415.07	-964.657		32	-0.00491	0	-0.00604	-0.00566	-0.00604	-0.00755	-0.00453	-0.000755		32	-9.6528	-58.5396	-51.6892	-98.7077	-95.2825	-66.6355	-56.9827
32.1	-0.04977	0.205496		32.1	-416.627	-960.921		32.1	-0.00982	-0.00906	-0.00566	-0.00831	-0.00566	-0.00491	-0.00718	-0.00378		32.1	-11.5211	-56.9827	-43.9047	-105.247	-90.3004	-66.3241	-59.7851
32.2	-0.02645	0.180064		32.2	-419.43	-967.148		32.2	-0.00566	-0.00302	-0.0068	-0.00604	-0.0068	-0.00453	-0.00453	-0.00491		32.2	-10.8983	-56.9827	-46.0843	-103.378	-87.498	-61.0306	-62.8989
32.3	-0.07697	0.189846		32.3	-423.166	-983.34		32.3	-0.01057	-0.00415	-0.00415	-0.00491	-0.00642	-0.0034	-0.00264	-0.000755		32.3	-10.2756	-56.0485	-40.7909	-101.199	-88.7435	-63.2103	-69.1265
32.4	-0.00702	0.193758		32.4	-419.118	-978.981		32.4	-0.00831	-0.00491	-0.00604	-0.00529	-0.00642	-0.00415	-0.00529	-0.00642		32.4	-10.5869	-53.8688	-45.4616	-99.3304	-90.3004	-66.9468	-66.6355
32.5	-0.01091	0.199627		32.5	-423.166	-971.508		32.5	-0.00869	-0.0068	-0.01208	-0.00869	-0.00755	-0.00453	-0.00491	-0.00453		32.5	-9.03004	-55.1144	-50.1323	-92.7914	-85.3183	-76.2883	-60.7192
32.6	-0.10029	0.21919		32.6	-434.687	-969.016		32.6	-0.00944	-0.00566	-0.0034	-0.00453	-0.00529	-0.00566	-0.00302	-0.0034		32.6	-10.2756	-53.8688	-44.216	-94.0369	-81.5817	-62.2761	-62.2761
32.7	-0.00702	0.199627		32.7	-434.999	-944.729		32.7	-0.00642	-0.00415	-0.00302	-0.00793	-0.00529	-0.00642	-0.0068	-0.0034		32.7	-10.5869	-54.4916	-42.3478	-100.887	-77.5338	-62.8989	-62.2761
32.8	0.012407	0.195715		32.8	-437.178	-935.076		32.8	-0.01322	-0.00302	-0.00529	-0.00566	-0.00566	-0.00529	-0.00415	-0.00642		32.8	-6.53899	-60.4078	-41.1022	-101.51	-79.7134	-66.6355	-61.6534
32.9	-0.042	0.227015		32.9	-430.328	-932.274		32.9	-0.00906	-0.00642	-0.00227	-0.00944	-0.00869	-0.00453	-0.00491	-0.0034		32.9	-9.6528	-55.1144	-41.725	-101.199	-82.5159	-66.3241	-62.8989
33	-0.08086	0.225059		33	-428.148	-914.836		33	-0.0068	-0.00453	-0.00529	-0.00566	-0.00529	-0.00529	-0.00529	-0.00302		33	-9.03004	-47.6412	-49.8209	-103.69	-84.0728	-64.4558	-63.2103
33.1	-0.00314	0.252447		33.1	-440.292	-911.722		33.1	-0.0102	-0.00302	-0.00944	-0.00529	-0.00793	-0.00642	-0.00453	-0.0034		33.1	-9.03004	-48.264	-47.0185	-102.444	-85.6297	-59.4737	-59.4737
33.2	-0.05365	0.238753		33.2	-444.652	-906.118		33.2	-0.00718	-0.00604	-0.00604	-0.00529	-0.00566	-0.00453	-0.0034	-0.00529		33.2	-10.2756	-45.773	-47.9526	-99.6418	-85.3183	-60.0965	-58.8509
33.3	-0.02645	0.260272		33.3	-448.388	-886.812		33.3	-0.00831	-0.00793	-0.00906	-0.00491	-0.00604	-0.00604	-0.00453	-0.00491		33.3	-8.40728	-48.5754	-46.7071	-103.378	-84.3841	-60.7192	-62.8989
33.4	-0.03034	0.275922		33.4	-448.388	-878.093		33.4	-0.00718	-0.00529	-0.00793	-0.00529	-0.00529	-0.00566	-0.00793	-0.00604		33.4	-8.71866	-53.8688	-51.6892	-102.756	-82.8272	-62.8989	-57.9168
33.5	-0.02257	0.256359		33.5	-443.406	-869.375		33.5	-0.00906	-0.00302	-0.00604	-0.00491	-0.00642	-0.00302	-0.00453	-0.00453		33.5	-8.40728	-51.3778	-49.1981	-106.804	-76.2883	-65.3899	-52.9347
33.6	-0.03811	0.270053		33.6	-444.029	-856.297		33.6	-0.01133	-0.00113	-0.0068	-0.00642	-0.00529	-0.00755	-0.00264	-0.00453		33.6	-8.71866	-57.9168	-53.8688	-109.295	-77.8452	-62.8989	-60.0965
33.7	-0.01868	0.273966		33.7	-452.436	-857.542		33.7	-0.00831	-0.00793	-0.0068	-0.00491	-0.00491	-0.0034	-0.00529	-0.00227		33.7	-8.71866	-56.0485	-53.2461	-108.049	-72.8631	-64.4558	-62.8989
33.8	-0.04977	0.266141		33.8	-455.861	-865.95		33.8	-0.00831	-0.00491	-0.00566	-0.00566	-0.0068	-0.00491	-0.00566	-0.00755		33.8	-7.16175	-53.8688	-56.6713	-105.247	-76.2883	-57.294	-62.8989
33.9	-0.042	0.268097		33.9	-453.993	-879.028		33.9	-0.00755	-0.00378	-0.00604	-0.00718	-0.00453	-0.00793	-0.00453	-0.00302		33.9	-5.60485	-53.5575	-57.6054	-109.917	-78.7793	-64.4558	-62.8989
34	-0.02645	0.260272		34	-457.107	-876.225		34	-0.01208	-0.0068	-0.00793	-0.00642	-0.00491	-0.00642	-0.00491	-0.00529		34	-8.40728	-52.9347	-51.3778	-107.426	-75.3541	-69.1265	-66.9468
34.1	-0.01091	0.266141		34.1	-455.238	-847.578		34.1	-0.00944	-0.00453	-0.00944	-0.00604	-0.00566	-0.00642	-0.00604	-0.00566		34.1	-8.40728	-57.6054	-48.5754	-107.115	-76.2883	-68.8151	-72.2403
34.2	-0.042	0.268097		34.2	-449.011	-823.913		34.2	-0.00831	-0.00491	-0.00604	-0.00529	-0.00491	-0.00529	-0.00227	-0.00151		34.2	-9.96418	-61.342	-48.8868	-103.69	-76.5996	-64.1444	-67.5696
34.3	-0.04977	0.272009		34.3	-448.077	-824.224		34.3	-0.01057	-0.0034	-0.00604	-0.00529	-0.00566	-0.00718	-0.00415	-0.00604		34.3	-8.40728	-61.342	-43.9047	-100.887	-76.2883	-53.8688	-63.5216
34.4	-0.10417	0.252447		34.4	-452.747	-827.338		34.4	-0.0102	-0.00604	-0.00491	-0.0068	-0.0068	-0.00378	-0.00604	-0.00189		34.4	-11.5211	-61.6534	-47.6412	-97.4621	-77.8452	-54.4916	-67.881
34.5	-0.03811	0.264184		34.5	-462.4	-817.374		34.5	-0.01133	-0.00302	-0.00604	-0.00264	-0.00491	-0.00453	-0.00151	-0.00529		34.5	-10.5869	-62.8989	-50.755	-92.48	-81.2703	-54.4916	-66.6355
34.6	0.012407	0.268097		34.6	-466.76	-800.871		34.6	-0.00642	-0.00227	-0.00793	-0.00415	-0.00415	-0.00566	-0.00453	-0.0034		34.6	-8.0959	-62.5875	-52.6233	-96.2166	-87.1866	-58.8509	-65.0786
34.7	-0.01868	0.277878		34.7	-472.053	-809.278		34.7	-0.0068	-0.0034	-0.00604	-0.00944	-0.0068	-0.0068	-0.00189	-0.00566		34.7	-7.78452	-60.0965	-48.8868	-98.3963	-84.3841	-63.2103	-68.5037
34.8	-0.03422	0.275922		34.8	-471.43	-812.703		34.8	-0.01057	-0.00869	-0.0068	-0.00793	-0.00415	-0.00642	-0.00415	-0.00491		34.8	-8.71866	-57.6054	-52.9347	-97.1508	-87.8093	-67.5696	-67.881
34.9	0.008521	0.272009		34.9	-481.083	-807.099		34.9	-0.00944	-0.00378	-0.00529	-0.00642	-0.00831	-0.00869	-0.0034	-0.0034		34.9	-6.85037	-54.803	-51.3778	-94.0369	-81.5817	-70.6834	-67.5696
35	0.031837	0.275922		35	-491.359	-808.967		35	-0.00906	-0.00453	-0.00906	-0.00378	-0.00566	-0.00453	-0.00378	-0.00566		35	-6.85037	-51.0664	-47.0185	-88.7435	-75.3541	-73.4858	-71.3062
35.1	0.008521	0.270053		35.1	-482.329	-813.015		35.1	-0.00906	-0.00415	-0.00831	-0.00264	-0.00491	-0.00604	-0.00302	-0.00566		35.1	-7.78452	-52.3119	-48.8868	-93.1028	-78.4679	-68.5037	-69.1265
35.2	-0.042	0.277878		35.2	-482.64	-797.446		35.2	-0.0068	-0.00453	-0.0034	-0.00227	-0.00642	-0.00415	-0.00378	-0.00189		35.2	-8.40728	-58.5396	-47.3299	-91.8573	-79.7134	-69.4379	-65.3899
35.3	-0.06143	0.279835		35.3	-481.083	-787.482		35.3	-0.00906	-0.00529	-0.00755	-0.0068	-0.00604	-0.00566	-0.00529	-0.00264		35.3	-11.5211	-57.294	-48.8868	-95.2825	-76.911	-63.5216	-68.8151
35.4	-0.02645	0.264184		35.4	-477.035	-788.416		35.4	-0.00982	-0.00604	-0.00566	-0.00529	-0.00151	-0.00302	-0.00415	-0.00604		35.4	-9.6528	-54.803	-50.755	-99.6418	-81.2703	-56.3599	-63.2103
35.5	-0.06531	0.281791		35.5	-475.167	-784.056		35.5	-0.00718	-0.00529	-0.00378	-0.00491	-0.00755	-0.00566	-0.00189	-0.0068		35.5	-8.40728	-56.9827	-45.4616	-93.7256	-85.9411	-56.0485	-58.2282
35.6	-0.04977	0.28766		35.6	-480.772	-778.763		35.6	-0.00869	-0.00491	-0.00755	-0.00264	-0.00529	-0.00491	-0.00529	-0.00566		35.6	-9.03004	-56.6713	-45.1502	-93.4142	-78.7793	-63.5216	-59.1623
35.7	-0.02257	0.277878		35.7	-480.772	-765.062		35.7	-0.01057	-0.00604	-0.00415	-0.0068	-0.00529	-0.00566	-0.00453	-0.00642		35.7	-6.22761	-54.1802	-42.3478	-93.4142	-70.0606	-58.2282	-63.833
35.8	-0.03034	0.283747		35.8	-476.412	-761.326		35.8	-0.01246	-0.0068	-0.00869	-0.00642	-0.00529	-0.00793	-0.00151	-0.0034		35.8	-7.78452	-53.8688	-46.3957	-94.3483	-74.7314	-59.1623	-67.2582
35.9	0.062924	0.285703		35.9	-475.478	-764.128		35.9	-0.0102	-0.00264	-0.00755	-0.0068	-0.00378	-0.00453	-0.00302	-0.00453		35.9	-7.47313	-49.1981	-44.8388	-97.1508	-72.8631	-57.294	-64.1444
36	0.06681	0.268097		36	-476.412	-764.128		36	-0.00944	-0.00453	-0.00944	-0.00793	-0.00453	-0.00566	-0.00491	-0.00604		36	-8.40728	-47.3299	-43.5933	-91.5459	-73.1744	-62.8989	-66.3241
36.1	0.074582	0.273966		36.1	-480.46	-761.948		36.1	-0.0102	-0.0068	-0.0034	-0.00793	-0.00491	-0.00604	-0.000378	-0.0034		36.1	-7.47313	-47.3299	-46.7071	-88.4321	-82.5159	-65.0786	-66.9468
36.2	0.024065	0.264184		36.2	-480.46	-764.751		36.2	-0.01095	-0.00642	-0.00793	-0.00378	-0.00604	-0.00378	-0.0034	-0.00491		36.2	-8.0959	-44.8388	-48.264	-90.9231	-79.4021	-64.7672	-62.5875
36.3	0.059038	0.291572		36.3	-482.951	-771.601		36.3	-0.01133	-0.00453	-0.00755	-0.000378	-0.00415	-0.00642	-0.00604	-0.00906		36.3	-7.47313	-47.6412	-43.5933	-92.1687	-79.0907	-63.833	-63.833
36.4	0.051266	0.30331		36.4	-491.67	-768.799		36.4	-0.00831	-0.0034	-0.00566	-0.00604	-0.00491	-0.0068	-0.00415	-0.00566		36.4	-7.78452	-48.264	-42.3478	-89.989	-79.7134	-64.1444	-66.0127
36.5	0.039609	0.289616		36.5	-491.67	-765.996		36.5	-0.0068	-0.00491	-0.00642	-0.00529	-0.00378	-0.00642	-0.00113	-0.00453		36.5	-8.40728	-52.9347	-36.1202	-96.2166	-80.959	-67.2582	-64.7672
36.6	0.06681	0.264184		36.6	-484.82	-765.374		36.6	-0.00982	-0.00604	-0.00604	-0.00415	-0.00189	-0.00491	-0.00264	-0.0068		36.6	-5.29347	-51.6892	-36.7429	-94.6597	-70.372	-72.8631	-60.0965
36.7	0.090126	0.277878		36.7	-478.281	-761.637		36.7	-0.01208	-0.00491	-0.00378	-0.00604	-0.00529	-0.00566	-0.0034	-0.0068		36.7	-5.60485	-53.8688	-38.6112	-99.9532	-74.42	-74.42	-65.0786
36.8	0.062924	0.293528		36.8	-472.676	-753.541		36.8	-0.01208	-0.00529	-0.00642	-0.00642	-0.0068	-0.00453	-0.00189	-0.00415		36.8	-8.0959	-48.5754	-35.4974	-101.199	-76.2883	-71.3062	-66.9468
36.9	0.08624	0.289616		36.9	-476.724	-741.397		36.9	-0.00793	-0.0068	-0.00604	-0.00453	-0.00378	-0.00378	-0.00113	-0.00453		36.9	-7.16175	-49.5095	-37.6771	-93.1028	-79.0907	-65.7013	-61.6534
37	0.043495	0.293528		37	-478.281	-732.056		37	-0.00982	-0.00642	-0.0068	-0.00566	-0.0034	-0.0068	-0.00529	-0.00227		37	-10.8983	-48.264	-41.4136	-89.989	-69.1265	-69.1265	-60.7192
37.1	0.097898	0.305266		37.1	-479.838	-718.044		37.1	-0.00982	-0.00642	-0.00566	-0.00642	-0.00755	-0.00491	-0.00264	-0.00453		37.1	-9.03004	-54.1802	-45.1502	-92.48	-59.1623	-69.4379	-56.9827
37.2	0.140643	0.299397		37.2	-478.281	-716.175		37.2	-0.00982	-0.00491	-0.00566	-0.000755	-0.00302	-0.00718	-0.0034	-0.00453		37.2	-7.47313	-54.1802	-43.9047	-91.2345	-58.5396	-70.9948	-59.1623
37.3	0.136757	0.289616		37.3	-474.855	-723.649		37.3	-0.00982	-0.0034	-0.0034	-0.00264	-0.00227	-0.0068	-0.000378	-0.00793		37.3	-8.71866	-51.0664	-44.5274	-93.7256	-66.9468	-60.4078	-56.9827
37.4	0.094012	0.28766		37.4	-476.724	-721.78		37.4	-0.0136	-0.00529	-0.00491	-0.00453	-0.00491	-0.00793	0	-0.00755		37.4	-6.85037	-45.773	-44.216	-91.2345	-68.5037	-57.6054	-56.6713
37.5	0.144529	0.301354		37.5	-483.885	-727.385		37.5	-0.0102	-0.00529	-0.00415	-0.00529	-0.00378	-0.00869	-0.00189	-0.00453		37.5	-6.53899	-47.0185	-44.216	-93.7256	-68.5037	-53.5575	-55.7371
37.6	0.10567	0.301354		37.6	-482.64	-722.403		37.6	-0.01095	-0.00529	-0.0068	-0.00869	-0.000378	-0.00566	-0.00415	-0.0068		37.6	-7.78452	-47.9526	-39.5453	-97.7735	-68.5037	-53.2461	-55.4258
37.7	0.097898	0.301354		37.7	-482.017	-731.122		37.7	-0.00944	-0.0068	-0.00566	-0.00793	-0.00718	-0.00529	-0.00264	-0.00642		37.7	-9.34142	-47.9526	-44.5274	-96.528	-67.2582	-57.294	-58.2282
37.8	0.113442	0.295485		37.8	-485.131	-724.583		37.8	-0.00982	-0.00529	-0.0068	-0.0034	-0.00264	-0.00378	-0.00264	-0.00529		37.8	-9.03004	-49.8209	-47.6412	-93.4142	-71.9289	-48.8868	-60.0965
37.9	0.10567	0.305266		37.9	-483.574	-723.649		37.9	-0.01095	-0.00793	-0.0068	-0.00302	-0.0034	-0.00529	-0.00227	-0.00529		37.9	-9.03004	-42.0364	-42.3478	-97.7735	-69.4379	-53.5575	-56.3599
38	0.117327	0.297441		38	-480.772	-722.403		38	-0.00906	-0.0068	-0.00566	-0.00793	-0.00529	-0.00642	-0.00604	-0.00604		38	-7.47313	-42.6591	-42.3478	-92.1687	-68.5037	-52.6233	-60.4078
38.1	0.179503	0.309179		38.1	-483.263	-719.601		38.1	-0.0102	-0.00491	-0.00604	-0.00529	0.000378	-0.0068	-0.00189	-0.00793		38.1	-7.78452	-38.6112	-42.0364	-95.9052	-74.1086	-55.1144	-54.4916
38.2	0.167845	0.320916		38.2	-483.574	-724.894		38.2	-0.00906	-0.00755	-0.00415	-0.00378	-0.00491	-0.00604	-0.00491	-0.00151		38.2	-8.71866	-36.4315	-37.9884	-92.7914	-73.7972	-46.0843	-47.3299
38.3	0.109556	0.307222		38.3	-481.394	-715.241		38.3	-0.01208	-0.0034	-0.00227	-0.00642	-0.00453	-0.0068	-0.00453	-0.0068		38.3	-7.16175	-37.0543	-38.9226	-98.3963	-74.1086	-46.7071	-48.5754
38.4	0.125099	0.315048		38.4	-487.933	-707.768		38.4	-0.01057	-0.00755	-0.00529	-0.00831	-0.00189	-0.0068	-0.00189	-0.00755		38.4	-4.67071	-33.9405	-43.2819	-98.3963	-71.9289	-49.8209	-53.8688
38.5	0.167845	0.311135		38.5	-486.999	-700.606		38.5	-0.01057	-0.00491	-0.00227	-0.00415	-0.00529	-0.00566	-0.00302	-0.0068		38.5	-8.71866	-33.3177	-46.3957	-97.1508	-70.6834	-52.0006	-53.5575
38.6	0.090126	0.326785		38.6	-482.64	-701.852		38.6	-0.00793	-0.00604	-0.00718	-0.00264	-0.00642	-0.00604	-0.00302	-0.00529		38.6	-7.47313	-33.0063	-44.5274	-94.3483	-73.7972	-48.5754	-53.5575
38.7	0.144529	0.309179		38.7	-478.281	-690.019		38.7	-0.01284	-0.00566	-0.00604	-0.00491	-0.00378	-0.00566	0	-0.00718		38.7	-9.03004	-37.0543	-47.3299	-87.1866	-69.7493	-48.5754	-51.6892
38.8	0.125099	0.307222		38.8	-470.496	-678.187		38.8	-0.00906	-0.00793	-0.00529	-0.00831	-0.00302	-0.00566	-0.00189	-0.00302		38.8	-6.85037	-42.3478	-48.5754	-88.4321	-73.1744	-56.3599	-54.1802
38.9	0.101784	0.307222		38.9	-474.544	-676.941		38.9	-0.00982	-0.00755	-0.00566	-0.00415	-0.00491	-0.00642	-0.00302	-0.00642		38.9	-8.0959	-41.1022	-47.6412	-93.1028	-68.8151	-52.9347	-54.4916
39	0.101784	0.315048		39	-474.544	-683.169		39	-0.01095	-0.00906	-0.00378	-0.00529	-0.000378	-0.0068	-0.0034	-0.0034		39	-7.47313	-41.4136	-49.1981	-94.3483	-71.9289	-50.755	-54.4916
39.1	0.101784	0.309179		39.1	-477.035	-687.528		39.1	-0.01208	-0.00566	-0.00529	-0.00453	-0.00189	-0.00566	-0.00189	-0.00793		39.1	-9.03004	-43.9047	-44.8388	-94.6597	-68.8151	-56.0485	-50.1323
39.2	0.144529	0.324829		39.2	-468.628	-690.954		39.2	-0.00944	-0.00755	-0.00566	-0.00831	-0.00302	-0.00604	-0.0034	-0.0068		39.2	-8.0959	-40.1681	-43.9047	-91.2345	-67.5696	-56.3599	-48.5754
39.3	0.167845	0.324829		39.3	-469.251	-687.84		39.3	-0.00944	-0.00642	-0.00642	-0.00529	-0.000378	-0.00566	-0.00227	-0.00604		39.3	-8.0959	-44.5274	-40.4795	-94.0369	-71.6175	-52.6233	-56.3599
39.4	0.175617	0.307222		39.4	-472.676	-692.199		39.4	-0.00869	-0.00831	-0.0034	-0.00755	-0.00113	-0.00566	-0.00113	-0.00189		39.4	-8.71866	-44.5274	-46.0843	-91.2345	-67.5696	-56.0485	-55.4258
39.5	0.175617	0.322873		39.5	-469.251	-690.331		39.5	-0.01171	-0.00566	-0.00378	-0.00529	-0.00378	-0.00566	-0.00415	-0.00604		39.5	-10.5869	-44.8388	-42.9705	-93.4142	-65.7013	-55.7371	-56.0485
39.6	0.187274	0.311135		39.6	-471.43	-691.265		39.6	-0.0102	-0.00869	-0.00453	-0.0068	-0.00529	-0.0034	-0.0034	-0.00566		39.6	-12.7666	-45.4616	-36.1202	-98.0849	-68.5037	-55.7371	-60.4078
39.7	0.206704	0.281791		39.7	-479.838	-682.546		39.7	-0.00869	-0.00604	-0.00453	-0.00453	-0.00529	-0.00491	-0.00227	-0.00642		39.7	-8.40728	-49.1981	-38.6112	-97.4621	-66.6355	-54.803	-55.7371
39.8	0.257221	0.301354		39.8	-486.065	-678.187		39.8	-0.01322	-0.01095	-0.00529	-0.00189	-0.00453	-0.00642	0.000755	-0.0034		39.8	-9.96418	-47.9526	-40.1681	-97.4621	-65.7013	-52.0006	-58.8509
39.9	0.264993	0.313091		39.9	-491.981	-685.66		39.9	-0.00869	-0.00869	-0.00604	-0.00755	-0.00566	-0.00642	-0.00566	-0.00793		39.9	-13.3894	-52.9347	-39.5453	-96.528	-67.5696	-56.6713	-64.1444
40	0.233906	0.295485		40	-489.802	-682.235		40	-0.00718	-0.00604	-0.00189	-0.00869	-0.00718	-0.00642	-0.00529	-0.00566		40	-10.2756	-47.0185	-41.1022	-99.9532	-68.8151	-55.4258	-63.2103
40.1	0.21059	0.295485		40.1	-491.981	-685.971		40.1	-0.00944	-0.00264	-0.00529	-0.00566	-0.00453	-0.00529	-0.00264	-0.00604		40.1	-12.1438	-48.8868	-44.5274	-96.528	-71.3062	-62.8989	-60.7192
40.2	0.175617	0.291572		40.2	-491.359	-690.642		40.2	-0.01171	-0.00982	-0.00264	-0.00755	-0.00113	-0.00378	-0.000378	-0.00491		40.2	-9.34142	-49.5095	-42.0364	-99.6418	-69.1265	-62.8989	-64.4558
40.3	0.202818	0.272009		40.3	-492.604	-699.984		40.3	-0.00982	-0.00982	-0.00604	-0.00566	-0.00151	-0.00529	-0.00227	-0.00529		40.3	-9.03004	-46.0843	-44.216	-104.001	-71.9289	-69.1265	-61.9647
40.4	0.163959	0.254403		40.4	-501.946	-705.9		40.4	-0.01171	-0.00793	-0.00302	-0.00642	-0.000378	-0.00302	-0.00378	-0.00227		40.4	-8.71866	-47.0185	-48.264	-102.756	-70.372	-72.5517	-62.2761
40.5	0.167845	0.275922		40.5	-509.419	-709.325		40.5	-0.01171	-0.00906	-0.00491	-0.00755	-0.00604	-0.00529	-0.00415	-0.00604		40.5	-8.40728	-42.3478	-46.0843	-99.019	-74.42	-69.7493	-62.5875
40.6	0.218362	0.281791		40.6	-508.796	-705.9		40.6	-0.00982	-0.00604	-0.0034	-0.00831	-0.00453	-0.00415	-0.00113	-0.00453		40.6	-7.16175	-43.2819	-44.5274	-95.2825	-73.1744	-64.4558	-61.9647
40.7	0.280537	0.277878		40.7	-501.634	-703.097		40.7	-0.00831	-0.00755	-0.00453	-0.00491	-0.00566	-0.0034	-0.00453	-0.0068		40.7	-8.0959	-44.216	-43.2819	-89.989	-71.9289	-58.8509	-62.5875
40.8	0.253335	0.275922		40.8	-506.616	-709.948		40.8	-0.01057	-0.00944	-0.00529	-0.00415	-0.00189	-0.00529	-0.00378	-0.00529		40.8	-5.60485	-48.264	-43.2819	-89.989	-73.7972	-61.6534	-66.6355
40.9	0.264993	0.275922		40.9	-502.568	-706.523		40.9	-0.00869	-0.00755	-0.00378	-0.00529	0.000378	-0.00566	-0.00227	-0.0034		40.9	-6.53899	-47.6412	-39.5453	-92.48	-70.9948	-62.5875	-63.5216
41	0.307739	0.299397		41	-487.933	-695.313		41	-0.01435	-0.00755	-0.00529	-0.00718	-0.00604	-0.00642	-0.0034	-0.0068		41	-6.53899	-46.7071	-39.5453	-93.7256	-67.5696	-61.9647	-61.0306
41.1	0.303853	0.291572		41.1	-488.556	-703.72		41.1	-0.01095	-0.0068	-0.000378	-0.00566	-0.00227	-0.00718	-0.00113	-0.0034		41.1	-9.34142	-47.6412	-40.1681	-94.3483	-68.5037	-61.342	-65.3899
41.2	0.264993	0.277878		41.2	-494.161	-715.241		41.2	-0.0102	-0.00755	-0.00529	-0.00566	0.000378	-0.00604	-0.00302	-0.00529		41.2	-7.16175	-40.7909	-42.0364	-89.989	-67.881	-52.6233	-70.6834
41.3	0.307739	0.252447		41.3	-486.688	-708.08		41.3	-0.00755	-0.00491	-0.00378	-0.00566	-0.0034	-0.00604	-0.00227	-0.0068		41.3	-8.0959	-40.4795	-38.6112	-87.1866	-67.2582	-50.1323	-73.7972
41.4	0.264993	0.273966		41.4	-482.951	-703.72		41.4	-0.01586	-0.0068	-0.00264	-0.00529	-0.00189	-0.00415	-0.00302	-0.00604		41.4	-6.53899	-38.9226	-41.725	-92.1687	-63.5216	-52.0006	-73.1744
41.5	0.296081	0.291572		41.5	-486.688	-702.786		41.5	-0.01095	-0.00604	-0.00264	-0.00982	-0.00718	-0.00302	-0.00264	-0.00227		41.5	-5.29347	-38.9226	-43.5933	-93.7256	-64.7672	-54.4916	-71.6175
41.6	0.253335	0.283747		41.6	-496.963	-695.936		41.6	-0.01246	-0.00604	-0.00642	-0.0068	-0.000755	-0.00491	-0.00302	-0.00604		41.6	-4.67071	-36.4315	-38.9226	-89.6776	-66.9468	-49.1981	-70.6834
41.7	0.264993	0.307222		41.7	-496.652	-702.163		41.7	-0.01095	-0.00793	-0.00378	-0.00566	-0.00151	-0.00491	-0.00113	-0.00189		41.7	-4.35933	-42.0364	-36.4315	-89.3662	-64.1444	-56.9827	-74.7314
41.8	0.206704	0.311135		41.8	-499.455	-699.672		41.8	-0.00566	-0.00793	-0.0034	-0.00869	-0.00453	-0.00378	-0.00491	-0.00566		41.8	-4.35933	-37.9884	-39.8567	-93.4142	-75.0427	-54.4916	-69.4379
41.9	0.24945	0.322873		41.9	-502.568	-700.918		41.9	-0.01095	-0.00793	-0.00453	-0.00604	-0.00189	-0.0068	-0.0034	-0.00491		41.9	-8.40728	-38.9226	-38.9226	-93.1028	-69.1265	-55.7371	-66.9468
42	0.327168	0.307222		42	-498.52	-697.804		42	-0.01246	-0.00944	-0.00151	-0.0068	-0.00566	-0.00755	-0.00302	-0.00453		42	-6.53899	-39.234	-40.4795	-89.3662	-71.3062	-63.5216	-78.1565
42.1	0.303853	0.297441		42.1	-495.095	-696.558		42.1	-0.00869	-0.00566	-0.00227	-0.00491	-0.00529	-0.00264	-0.00264	-0.00642		42.1	-8.40728	-43.9047	-43.9047	-87.1866	-70.0606	-63.2103	-71.9289
42.2	0.33494	0.30331		42.2	-491.359	-702.786		42.2	-0.00831	-0.00982	-0.00113	-0.0102	-0.0034	-0.00529	-0.00227	-0.00491		42.2	-5.60485	-50.4437	-47.3299	-88.4321	-68.5037	-67.2582	-75.0427
42.3	0.323282	0.330698		42.3	-491.67	-692.51		42.3	-0.0102	-0.00906	-0.00415	-0.00869	-0.00264	-0.00642	-0.00264	-0.00378		42.3	-5.29347	-46.3957	-47.9526	-93.7256	-65.0786	-63.833	-75.0427
42.4	0.261107	0.313091		42.4	-492.604	-678.498		42.4	-0.01171	-0.00718	0.000378	-0.00718	-0.00529	-0.00642	-0.00453	-0.00378		42.4	-7.78452	-39.234	-47.0185	-88.7435	-68.8151	-62.2761	-70.372
42.5	0.179503	0.330698		42.5	-491.67	-676.007		42.5	-0.01171	-0.0068	-0.00529	-0.00906	-0.00378	-0.00264	-0.00227	-0.00264		42.5	-4.98209	-42.9705	-47.3299	-89.989	-72.2403	-57.9168	-65.3899
42.6	0.284423	0.330698		42.6	-498.209	-689.085		42.6	-0.00906	-0.00982	0.000755	-0.00642	-0.00189	-0.00491	-0.00227	-0.0034		42.6	-8.71866	-43.9047	-48.5754	-92.1687	-67.5696	-57.6054	-69.7493
42.7	0.257221	0.348304		42.7	-504.748	-679.121		42.7	-0.00642	-0.01246	-0.00566	-0.00491	-0.00189	-0.00529	-0.00302	-0.0068		42.7	-8.0959	-45.1502	-44.216	-92.48	-70.372	-58.8509	-69.7493
42.8	0.24945	0.352217		42.8	-491.981	-674.45		42.8	-0.01057	-0.00906	-0.00793	-0.00642	-0.00264	-0.00453	-0.00378	-0.00302		42.8	-9.6528	-42.3478	-42.9705	-90.9231	-69.1265	-61.9647	-67.881
42.9	0.214476	0.338523		42.9	-489.179	-682.235		42.9	-0.0102	-0.00793	-0.00642	-0.00566	0.000378	-0.00302	-0.00453	-0.00529		42.9	-7.78452	-38.2998	-43.9047	-92.1687	-66.3241	-64.4558	-68.1924
43	0.261107	0.338523		43	-502.568	-679.744		43	-0.0136	-0.00604	-0.00642	-0.01057	-0.00378	-0.00151	-0.0034	-0.00378		43	-8.0959	-45.1502	-42.6591	-96.528	-67.881	-61.6534	-67.2582
43.1	0.303853	0.338523		43.1	-502.568	-677.253		43.1	-0.00793	-0.00755	-0.00227	-0.00793	-0.00642	-0.00453	-0.00453	-0.00566		43.1	-6.22761	-43.9047	-42.9705	-91.5459	-70.0606	-56.0485	-66.0127
43.2	0.272765	0.31896		43.2	-502.257	-683.169		43.2	-0.00718	-0.00453	-0.000378	-0.00302	-0.00302	-0.00529	-0.00189	-0.00151		43.2	-7.47313	-42.0364	-39.8567	-101.199	-69.4379	-55.1144	-62.8989
43.3	0.257221	0.315048		43.3	-509.419	-681.301		43.3	-0.01322	-0.00529	-0.00189	-0.0068	-0.00566	-0.0034	-0.000755	-0.0034		43.3	-8.40728	-44.5274	-37.3657	-95.2825	-71.9289	-52.3119	-61.9647
43.4	0.206704	0.283747		43.4	-510.041	-658.57		43.4	-0.00869	-0.00831	-0.00566	-0.00793	-0.00491	-0.00529	-0.00302	-0.00189		43.4	-7.78452	-47.9526	-38.9226	-96.2166	-74.7314	-54.1802	-59.1623
43.5	0.218362	0.266141		43.5	-516.892	-656.702		43.5	-0.00718	-0.0068	0.000378	-0.00982	-0.00453	-0.00189	-0.00453	-0.00264		43.5	-6.85037	-43.9047	-41.4136	-94.0369	-72.8631	-61.6534	-65.0786
43.6	0.226134	0.28766		43.6	-518.76	-654.522		43.6	-0.01133	-0.00982	-0.0034	-0.00604	-0.00302	-0.0034	-0.00302	-0.00529		43.6	-6.53899	-43.9047	-42.0364	-97.4621	-76.911	-61.0306	-63.2103
43.7	0.183388	0.313091		43.7	-515.958	-647.36		43.7	-0.01208	-0.00906	-0.00491	-0.00831	-0.0034	-0.00264	-0.00415	-0.0034		43.7	-7.78452	-44.8388	-41.4136	-91.5459	-69.1265	-58.8509	-63.2103
43.8	0.233906	0.313091		43.8	-510.976	-648.917		43.8	-0.01057	-0.00793	-0.00453	-0.00491	-0.00415	-0.00831	-0.00604	-0.00264		43.8	-5.60485	-37.9884	-41.4136	-88.1207	-71.6175	-60.0965	-62.8989
43.9	0.24945	0.330698		43.9	-507.862	-657.325		43.9	-0.00642	-0.00718	-0.00529	-0.00906	-0.00566	-0.00264	-0.00453	-0.00793		43.9	-6.22761	-44.216	-35.186	-90.6118	-77.2224	-66.3241	-61.342
44	0.257221	0.31896		44	-515.335	-657.636		44	-0.0102	-0.00793	0.000755	-0.00491	-0.00566	-0.00415	-0.00302	-0.00227		44	-8.40728	-49.5095	-39.5453	-91.5459	-75.3541	-58.8509	-58.2282
44.1	0.24945	0.326785		44.1	-510.041	-660.127		44.1	-0.00982	-0.01057	-0.0034	-0.00944	-0.00264	-0.00755	-0.00491	-0.0034		44.1	-4.35933	-45.4616	-39.5453	-92.1687	-68.5037	-61.6534	-59.4737
44.2	0.245564	0.299397		44.2	-510.976	-671.337		44.2	-0.00642	-0.00604	-0.00491	-0.01095	-0.00491	-0.00604	-0.00302	-0.0034		44.2	-4.98209	-43.9047	-35.186	-89.0549	-66.6355	-62.5875	-64.1444
44.3	0.23002	0.315048		44.3	-515.335	-666.355		44.3	-0.00906	-0.00718	-0.00378	-0.00642	-0.00302	-0.00302	-0.00529	-0.00378		44.3	-5.29347	-43.5933	-39.8567	-91.2345	-66.9468	-64.4558	-57.6054
44.4	0.237792	0.309179		44.4	-517.826	-658.259		44.4	-0.01095	-0.00869	-0.00264	-0.00982	-0.00453	-0.000755	-0.0034	-0.00529		44.4	-4.04795	-44.5274	-40.1681	-88.4321	-62.5875	-64.7672	-61.342
44.5	0.350484	0.285703		44.5	-515.335	-644.247		44.5	-0.01133	-0.00982	-0.00491	-0.00642	-0.00529	-0.00566	-0.0034	-0.00227		44.5	-4.67071	-43.9047	-35.4974	-85.3183	-67.2582	-66.6355	-62.8989
44.6	0.307739	0.28766		44.6	-518.137	-645.803		44.6	-0.01133	-0.00906	-0.00642	-0.00755	-0.0034	-0.00453	-0.00453	-0.00415		44.6	-4.04795	-42.9705	-37.0543	-92.48	-68.5037	-65.3899	-63.5216
44.7	0.257221	0.258316		44.7	-525.922	-651.408		44.7	-0.00529	-0.00604	-0.000755	-0.0068	-0.0034	-0.00227	-0.00378	-0.00378		44.7	-4.67071	-42.9705	-37.9884	-89.989	-68.1924	-62.5875	-55.4258
44.8	0.264993	0.252447		44.8	-527.479	-653.899		44.8	-0.00642	-0.00566	-0.00453	-0.00755	-0.00453	-0.00415	-0.00453	-0.00415		44.8	-8.71866	-41.725	-39.5453	-92.1687	-68.1924	-60.7192	-54.803
44.9	0.24945	0.273966		44.9	-529.658	-647.049		44.9	-0.00944	-0.00529	-0.00189	-0.00982	-0.00302	-0.00302	-0.0034	0		44.9	-6.85037	-33.0063	-41.4136	-91.5459	-69.4379	-58.5396	-61.0306
45	0.24945	0.275922		45	-539.311	-639.264		45	-0.01171	-0.00869	-0.00491	-0.01057	-0.00566	-0.00453	-0.00604	-0.00453		45	-5.60485	-30.2039	-43.9047	-91.8573	-62.5875	-54.803	-64.1444
45.1	0.257221	0.28766		45.1	-539.623	-632.725		45.1	-0.0068	-0.00604	-0.00264	-0.00906	-0.0034	-0.0034	-0.0034	-0.00604		45.1	-2.17966	-33.6291	-45.4616	-96.2166	-59.1623	-57.6054	-62.8989
45.2	0.323282	0.268097		45.2	-529.658	-633.66		45.2	-0.00793	-0.00453	-0.00491	-0.00453	-0.00642	-0.00642	-0.00378	-0.00113		45.2	-7.78452	-32.695	-42.9705	-92.48	-63.5216	-61.0306	-63.5216
45.3	0.327168	0.277878		45.3	-527.79	-639.264		45.3	-0.00906	-0.00604	-0.00189	-0.0102	-0.00264	-0.00302	-0.00831	-0.00264		45.3	-7.16175	-30.5153	-43.5933	-101.199	-67.2582	-61.6534	-68.5037
45.4	0.381572	0.305266		45.4	-525.922	-638.953		45.4	-0.01133	-0.00831	-0.00264	-0.0102	-0.00378	-0.00264	-0.00227	-0.00529		45.4	-4.67071	-30.5153	-42.0364	-93.1028	-62.2761	-62.2761	-71.3062
45.5	0.33494	0.326785		45.5	-528.724	-643.312		45.5	-0.00604	-0.01057	-0.00453	-0.01171	-0.0068	-0.00453	-0.00378	-0.00302		45.5	-8.71866	-30.8267	-41.1022	-97.7735	-62.8989	-60.0965	-72.8631
45.6	0.276651	0.330698		45.6	-528.724	-643.935		45.6	-0.0102	-0.00491	-0.00264	-0.01208	-0.00453	-0.00264	-0.00227	-0.0034		45.6	-6.85037	-29.5812	-40.4795	-97.1508	-66.6355	-61.342	-68.5037
45.7	0.280537	0.31896		45.7	-529.347	-641.444		45.7	-0.01057	-0.00869	-0.0034	-0.0034	-0.0068	-0.00189	-0.00718	-0.0034		45.7	-4.67071	-33.3177	-40.1681	-102.756	-64.7672	-61.9647	-66.3241
45.8	0.24945	0.324829		45.8	-529.347	-631.791		45.8	-0.00906	-0.00529	-0.00453	-0.00453	-0.00415	-0.00264	-0.00302	-0.00415		45.8	-6.22761	-37.0543	-39.5453	-104.313	-62.8989	-59.7851	-69.7493
45.9	0.264993	0.31896		45.9	-530.904	-631.48		45.9	-0.01171	-0.00755	-0.00264	-0.00793	-0.00491	-0.00415	-0.00529	-0.00566		45.9	-7.16175	-34.2519	-40.7909	-97.1508	-61.9647	-61.342	-69.7493
46	0.241678	0.315048		46	-529.036	-637.396		46	-0.01095	-0.00755	-0.00227	-0.0068	-0.00378	-0.00415	-0.00529	-0.000755		46	-5.60485	-35.4974	-42.0364	-95.9052	-64.1444	-61.6534	-70.9948
46.1	0.241678	0.33461		46.1	-522.185	-640.51		46.1	-0.01397	-0.00491	-0.00453	-0.00793	-0.00453	-0.00604	-0.00453	-0.00453		46.1	-5.60485	-32.3836	-41.1022	-98.7077	-63.2103	-60.4078	-65.3899
46.2	0.288309	0.33461		46.2	-528.413	-638.953		46.2	-0.00944	-0.0068	-0.00189	-0.00906	-0.00529	-0.00453	-0.0034	-0.0034		46.2	-7.16175	-36.1202	-38.6112	-99.019	-67.5696	-59.7851	-67.881
46.3	0.303853	0.30331		46.3	-523.742	-631.791		46.3	-0.00906	-0.00718	-0.00264	-0.01095	-0.0034	-0.00378	-0.00415	-0.00227		46.3	-5.60485	-34.8746	-43.2819	-97.1508	-65.3899	-57.294	-67.881
46.4	0.311625	0.320916		46.4	-519.071	-619.959		46.4	-0.00944	-0.00944	-0.00604	-0.00755	-0.00566	-0.00604	-0.00529	-0.00227		46.4	-4.98209	-27.7129	-45.4616	-102.444	-63.833	-57.294	-69.7493
46.5	0.315511	0.30331		46.5	-520.006	-613.108		46.5	-0.00718	-0.00718	-0.00151	-0.00831	-0.0068	-0.000378	-0.0034	-0.00302		46.5	-4.67071	-27.4015	-45.4616	-98.3963	-67.881	-62.8989	-71.3062
46.6	0.284423	0.301354		46.6	-520.006	-610.306		46.6	-0.00869	-0.00566	-0.00604	-0.0068	-0.00491	-0.00566	-0.00491	0		46.6	-5.91623	-27.7129	-41.4136	-95.2825	-65.3899	-61.0306	-69.1265
46.7	0.338826	0.326785		46.7	-518.449	-604.39		46.7	-0.00944	-0.00793	-0.00529	-0.00566	-0.00415	-0.00151	-0.0034	-0.000378		46.7	-6.53899	-27.7129	-42.3478	-97.7735	-72.8631	-60.0965	-63.833
46.8	0.323282	0.330698		46.8	-516.269	-609.372		46.8	-0.00869	-0.0034	-0.00227	-0.00944	-0.0068	-0.00264	-0.00529	-0.0034		46.8	-8.0959	-28.3356	-42.0364	-97.7735	-73.7972	-59.4737	-70.6834
46.9	0.327168	0.336567		46.9	-516.892	-617.156		46.9	-0.00831	-0.00755	-0.00529	-0.00831	-0.00755	-0.00378	-0.0034	-0.00566		46.9	-5.29347	-29.8925	-42.6591	-96.2166	-75.9769	-57.6054	-69.7493
47	0.257221	0.326785		47	-510.664	-627.432		47	-0.00453	-0.00906	-0.000755	-0.01057	-0.00415	-0.00415	-0.00529	-0.0034		47	-7.47313	-33.0063	-44.5274	-97.7735	-80.959	-58.5396	-66.0127
47.1	0.237792	0.305266		47.1	-511.91	-640.51		47.1	-0.00755	-0.00491	-0.0068	-0.01057	-0.00491	-0.00227	-0.00227	-0.00604		47.1	-7.47313	-30.2039	-37.6771	-97.4621	-81.5817	-58.5396	-62.5875
47.2	0.264993	0.309179		47.2	-515.024	-636.151		47.2	-0.00755	-0.00869	-0.00642	-0.00906	-0.00529	-0.00302	-0.00566	-0.0034		47.2	-4.98209	-32.3836	-37.0543	-102.444	-76.2883	-56.9827	-66.3241
47.3	0.264993	0.293528		47.3	-514.712	-633.971		47.3	-0.00718	-0.0068	-0.000378	-0.01246	-0.00415	-0.00227	-0.00755	-0.00302		47.3	-4.98209	-27.7129	-41.725	-105.247	-74.7314	-53.8688	-65.0786
47.4	0.253335	0.291572		47.4	-514.401	-625.875		47.4	-0.00793	-0.00378	-0.00491	-0.0102	-0.00453	-0.00227	-0.00566	-0.00189		47.4	-6.85037	-27.7129	-42.3478	-102.133	-76.2883	-51.3778	-55.1144
47.5	0.311625	0.311135		47.5	-519.071	-624.007		47.5	-0.00604	-0.00944	-0.00566	-0.00831	-0.00302	0.000755	-0.00415	-0.00151		47.5	-8.40728	-30.2039	-42.0364	-104.313	-78.7793	-55.4258	-61.342
47.6	0.237792	0.283747		47.6	-525.299	-616.222		47.6	-0.00718	-0.00529	-0.00491	-0.00642	-0.00944	-0.00453	-0.00453	-0.00264		47.6	-8.0959	-28.3356	-41.725	-99.9532	-75.9769	-56.3599	-61.342
47.7	0.253335	0.291572		47.7	-519.694	-609.683		47.7	-0.00566	-0.0068	-0.00566	-0.00755	-0.0068	-0.00264	-0.00491	-0.00189		47.7	-5.60485	-31.7608	-37.6771	-99.3304	-76.911	-59.7851	-59.7851
47.8	0.264993	0.283747		47.8	-520.94	-606.881		47.8	-0.00869	-0.00415	-0.00302	-0.00906	-0.00491	-0.0068	-0.00491	-0.00189		47.8	-7.16175	-29.8925	-34.2519	-94.3483	-83.1386	-58.8509	-64.4558
47.9	0.299967	0.273966		47.9	-528.724	-604.39		47.9	-0.01057	-0.00642	-0.0034	-0.0102	-0.00529	-0.00491	-0.00604	-0.00227		47.9	-6.22761	-25.8446	-33.0063	-93.1028	-80.0248	-51.6892	-63.5216
48	0.23002	0.266141		48	-527.79	-604.39		48	-0.00906	-0.00755	-0.00529	-0.01057	-0.00529	-0.00453	-0.00491	-0.00302		48	-6.22761	-29.5812	-35.186	-89.0549	-75.9769	-51.3778	-66.9468
48.1	0.214476	0.279835		48.1	-521.563	-620.893		48.1	-0.01057	-0.00189	-0.00264	-0.00604	-0.0034	-0.00415	-0.00302	-0.00302		48.1	-8.0959	-29.2698	-40.1681	-94.9711	-81.5817	-56.9827	-66.3241
48.2	0.237792	0.283747		48.2	-518.76	-633.971		48.2	-0.00642	-0.00718	-0.00566	-0.0102	-0.00642	-0.00378	-0.00453	-0.00415		48.2	-6.53899	-27.4015	-43.2819	-94.0369	-80.3362	-66.6355	-64.4558
48.3	0.218362	0.28766		48.3	-519.071	-638.953		48.3	-0.00642	-0.0068	-0.00529	-0.00869	-0.00755	-0.00415	-0.00227	-0.00113		48.3	-5.29347	-25.5332	-39.8567	-95.9052	-78.1565	-61.342	-63.833
48.4	0.233906	0.301354		48.4	-519.383	-642.69		48.4	-0.0068	-0.00453	-0.00491	-0.00906	-0.00491	-0.00227	-0.0034	-0.00264		48.4	-6.22761	-33.3177	-38.2998	-92.1687	-82.5159	-58.5396	-61.6534
48.5	0.23002	0.295485		48.5	-527.79	-644.247		48.5	-0.00906	-0.00566	-0.00415	-0.01057	-0.00642	-0.00453	-0.00566	-0.00227		48.5	-6.22761	-32.0722	-41.1022	-98.7077	-85.3183	-59.4737	-61.9647
48.6	0.226134	0.299397		48.6	-535.263	-644.558		48.6	-0.00453	-0.0068	-0.00378	-0.00982	-0.00793	-0.00264	-0.00718	-0.000755		48.6	-6.22761	-28.647	-37.6771	-97.4621	-79.4021	-59.1623	-65.7013
48.7	0.299967	0.28766		48.7	-533.706	-645.181		48.7	-0.00642	-0.00566	-0.00227	-0.00906	-0.00604	-0.00415	-0.00718	-0.00415		48.7	-7.16175	-27.0901	-43.9047	-97.7735	-81.2703	-62.5875	-60.0965
48.8	0.346598	0.285703		48.8	-528.413	-650.163		48.8	-0.01133	-0.00453	-0.00604	-0.0068	-0.00566	-0.00302	-0.00453	-0.00378		48.8	-7.78452	-26.4674	-41.4136	-95.5938	-84.0728	-63.833	-61.0306
48.9	0.299967	0.268097		48.9	-529.036	-648.917		48.9	-0.0102	-0.00718	-0.00453	-0.0102	-0.00566	-0.0034	-0.00642	-0.000755		48.9	-5.29347	-24.2877	-44.5274	-94.3483	-81.2703	-63.2103	-57.9168
49	0.261107	0.279835		49	-533.084	-657.636		49	-0.01057	-0.00453	-0.00302	-0.01095	-0.00604	-0.00151	-0.00831	-0.0034		49	-8.0959	-33.6291	-47.3299	-92.1687	-77.5338	-62.5875	-60.0965
49.1	0.342712	0.260272		49.1	-535.575	-649.229		49.1	-0.00906	-0.00831	-0.00793	-0.00793	-0.00869	-0.00491	-0.00227	-0.00189		49.1	-6.22761	-34.5632	-51.3778	-99.9532	-83.1386	-61.0306	-56.6713
49.2	0.35437	0.277878		49.2	-529.97	-642.067		49.2	-0.00566	-0.00944	-0.00491	-0.00604	-0.00453	-0.00189	-0.00453	-0.00227		49.2	-7.16175	-38.9226	-49.1981	-103.378	-92.48	-61.342	-58.5396
49.3	0.338826	0.279835		49.3	-533.706	-648.606		49.3	-0.00944	-0.00529	-0.00529	-0.01057	-0.00529	-0.00189	-0.00566	-0.00189		49.3	-6.22761	-40.4795	-48.5754	-104.624	-87.1866	-62.2761	-63.2103
49.4	0.35437	0.273966		49.4	-534.329	-648.294		49.4	-0.00906	-0.0034	-0.00415	-0.00944	-0.00869	-0.00529	-0.00529	-0.00302		49.4	-7.16175	-37.3657	-49.1981	-102.133	-88.7435	-60.4078	-64.1444
49.5	0.350484	0.266141		49.5	-534.329	-634.282		49.5	-0.01057	-0.00718	-0.00415	-0.00793	-0.00906	-0.00604	-0.00793	-0.00264		49.5	-8.40728	-36.1202	-48.5754	-93.4142	-89.3662	-55.4258	-69.1265
49.6	0.303853	0.277878		49.6	-529.347	-636.462		49.6	-0.00566	-0.00491	-0.00529	-0.0068	-0.00529	-0.00453	-0.00642	-0.0034		49.6	-7.78452	-37.6771	-48.8868	-94.6597	-86.8752	-54.803	-67.2582
49.7	0.33494	0.277878		49.7	-526.856	-633.348		49.7	-0.00906	-0.00566	-0.00642	-0.00718	-0.00302	-0.00415	-0.00453	-0.00378		49.7	-7.47313	-33.9405	-47.3299	-97.7735	-89.3662	-58.5396	-70.6834
49.8	0.319397	0.264184		49.8	-528.724	-624.318		49.8	-0.0136	-0.00491	-0.00529	-0.0068	-0.00491	-0.00453	-0.0068	-0.00189		49.8	-6.53899	-32.695	-45.1502	-96.528	-83.1386	-59.1623	-68.1924
49.9	0.346598	0.279835		49.9	-529.97	-620.27		49.9	-0.00982	-0.0034	-0.00566	-0.01246	-0.00642	-0.00302	-0.00453	-0.00264		49.9	-5.60485	-28.647	-43.5933	-95.9052	-83.1386	-57.294	-67.5696
50	0.24945	0.285703		50	-527.79	-619.336		50	-0.00944	-0.00566	-0.00718	-0.00944	-0.00491	-0.00378	-0.00491	-0.00113		50	-7.16175	-26.4674	-45.4616	-94.6597	-80.959	-52.0006	-68.8151
50.1	0.276651	0.270053		50.1	-522.808	-611.552		50.1	-0.01322	-0.00378	-0.00718	-0.00718	-0.00642	-0.00453	-0.00264	-0.00151		50.1	-8.0959	-30.2039	-39.8567	-98.3963	-75.3541	-52.9347	-72.2403
50.2	0.303853	0.275922		50.2	-520.006	-606.569		50.2	-0.00906	-0.00642	-0.00302	-0.00453	-0.0068	-0.00566	-0.0068	-0.00566		50.2	-7.78452	-24.5991	-42.0364	-96.2166	-75.3541	-54.803	-67.5696
50.3	0.327168	0.272009		50.3	-529.347	-609.372		50.3	-0.00491	-0.00378	-0.00415	-0.00869	-0.0068	-0.00453	-0.00302	-0.00566		50.3	-8.71866	-27.7129	-40.7909	-91.2345	-70.0606	-57.294	-67.881
50.4	0.307739	0.279835		50.4	-526.233	-607.192		50.4	-0.00869	-0.00113	-0.00378	-0.00755	-0.00755	-0.0034	-0.00453	-0.00189		50.4	-7.47313	-30.2039	-41.4136	-90.9231	-67.881	-57.9168	-66.9468
50.5	0.338826	0.264184		50.5	-523.119	-593.491		50.5	-0.00755	-0.00718	-0.00642	-0.00869	-0.00793	-0.00378	-0.0068	-0.00302		50.5	-8.40728	-28.3356	-45.1502	-92.48	-70.0606	-57.294	-65.3899
50.6	0.280537	0.273966		50.6	-524.365	-596.605		50.6	-0.00982	-0.00566	-0.00529	-0.00529	-0.00793	-0.00264	-0.00491	-0.000755		50.6	-8.0959	-31.4494	-46.0843	-92.7914	-66.3241	-56.6713	-61.342
50.7	0.261107	0.275922		50.7	-522.497	-591.312		50.7	-0.0068	-0.00302	-0.00642	-0.00982	-0.00793	-0.00793	-0.00831	-0.00529		50.7	-6.53899	-33.3177	-48.8868	-93.7256	-70.6834	-61.342	-63.5216
50.8	0.327168	0.260272		50.8	-520.006	-596.917		50.8	-0.00604	-0.00755	-0.00831	-0.00604	-0.00566	-0.00491	-0.00415	-0.00302		50.8	-10.5869	-34.8746	-50.1323	-94.3483	-65.7013	-58.5396	-64.4558
50.9	0.280537	0.275922		50.9	-521.563	-602.21		50.9	-0.00604	-0.00378	-0.00491	-0.00831	-0.00906	-0.00302	-0.00491	-0.00264		50.9	-7.78452	-31.4494	-54.1802	-101.199	-59.7851	-56.9827	-62.2761
51	0.24945	0.289616		51	-518.449	-604.701		51	-0.00831	-0.00642	-0.00642	-0.00793	-0.00793	-0.00453	-0.00189	-0.00227		51	-7.78452	-30.8267	-50.755	-96.528	-67.2582	-56.6713	-61.6534
51.1	0.272765	0.244622		51.1	-515.024	-606.569		51.1	-0.00982	-0.00227	-0.00869	-0.00529	-0.00906	-0.00302	-0.00642	-0.0034		51.1	-7.47313	-33.6291	-45.4616	-97.4621	-65.0786	-56.9827	-56.9827
51.2	0.299967	0.246578		51.2	-510.041	-590.066		51.2	-0.00944	-0.00831	-0.00491	-0.0068	-0.0068	-0.0034	-0.0068	-0.0034		51.2	-8.71866	-34.8746	-49.1981	-99.019	-60.0965	-53.2461	-58.2282
51.3	0.257221	0.293528		51.3	-515.958	-575.12		51.3	-0.01133	-0.00529	-0.00529	-0.00604	-0.00755	-0.00529	-0.00453	-0.00453		51.3	-7.78452	-38.2998	-50.1323	-100.887	-66.3241	-49.8209	-57.9168
51.4	0.264993	0.285703		51.4	-517.826	-565.779		51.4	-0.00642	-0.00415	-0.00869	-0.00982	-0.00415	-0.00566	-0.00566	-0.00566		51.4	-8.40728	-36.7429	-57.6054	-102.756	-64.4558	-45.1502	-62.8989
51.5	0.307739	0.291572		51.5	-521.874	-568.892		51.5	-0.00831	-0.00869	-0.00793	-0.0068	-0.00453	-0.00378	-0.00529	-0.0034		51.5	-9.03004	-37.0543	-52.6233	-101.821	-59.4737	-48.264	-61.6534
51.6	0.214476	0.295485		51.6	-527.479	-570.449		51.6	-0.01322	-0.00869	-0.00566	-0.00793	-0.00718	-0.00415	-0.0068	-0.00264		51.6	-8.0959	-38.9226	-52.0006	-99.3304	-63.5216	-47.3299	-63.833
51.7	0.299967	0.289616		51.7	-522.185	-562.976		51.7	-0.00944	-0.00453	-0.00453	-0.00906	-0.00529	-0.00453	-0.00453	-0.0034		51.7	-5.29347	-35.186	-50.755	-108.049	-73.4858	-47.3299	-58.2282
51.8	0.35437	0.273966		51.8	-514.712	-561.731		51.8	-0.01133	-0.00227	-0.00906	-0.00566	-0.00906	-0.00604	-0.00415	-0.00378		51.8	-6.85037	-32.3836	-50.4437	-109.295	-72.8631	-52.3119	-62.2761
51.9	0.268879	0.268097		51.9	-515.646	-566.09		51.9	-0.00831	-0.00415	-0.00718	-0.00604	-0.00604	-0.0034	-0.00378	-0.00415		51.9	-6.22761	-33.3177	-52.3119	-96.528	-67.2582	-49.5095	-57.6054
52	0.226134	0.275922		52	-515.335	-569.515		52	-0.01057	-0.00755	-0.00604	-0.00793	-0.00604	-0.00491	-0.00378	-0.00227		52	-7.78452	-28.0243	-48.8868	-101.821	-66.9468	-47.9526	-55.1144
52.1	0.23002	0.291572		52.1	-510.041	-568.581		52.1	-0.01133	-0.00415	-0.0068	-0.00831	-0.00831	-0.00529	-0.00718	-0.00491		52.1	-6.85037	-29.2698	-51.6892	-94.9711	-61.0306	-51.3778	-53.5575
52.2	0.214476	0.28766		52.2	-514.401	-576.988		52.2	-0.00906	-0.00566	-0.00906	-0.00604	-0.00604	-0.00491	-0.0034	-0.00189		52.2	-4.98209	-27.4015	-43.5933	-94.6597	-62.8989	-50.1323	-52.9347
52.3	0.292195	0.272009		52.3	-510.976	-582.905		52.3	-0.00982	-0.00642	-0.00453	-0.00604	-0.00793	-0.00604	-0.00529	-0.00302		52.3	-9.96418	-27.7129	-43.2819	-92.48	-68.5037	-50.4437	-56.6713
52.4	0.280537	0.317004		52.4	-508.485	-581.659		52.4	-0.01246	-0.00302	-0.0068	-0.00755	-0.00491	-0.00529	-0.00491	-0.00264		52.4	-9.96418	-28.3356	-45.773	-88.4321	-66.0127	-48.264	-54.803
52.5	0.23002	0.299397		52.5	-517.203	-588.509		52.5	-0.01133	-0.0068	-0.00604	-0.00566	-0.00491	-0.0034	-0.00604	-0.00529		52.5	-9.34142	-32.695	-47.9526	-90.9231	-63.2103	-49.5095	-56.9827
52.6	0.268879	0.277878		52.6	-520.317	-588.509		52.6	-0.00982	-0.00642	-0.00491	-0.00718	-0.00831	-0.00378	-0.0034	-0.00415		52.6	-7.78452	-34.2519	-51.6892	-94.9711	-62.8989	-51.0664	-52.6233
52.7	0.299967	0.270053		52.7	-526.856	-579.168		52.7	-0.0102	-0.00189	-0.0068	-0.00831	-0.00755	-0.00415	-0.0034	-0.00453		52.7	-6.22761	-29.5812	-51.0664	-92.7914	-66.3241	-52.0006	-52.9347
52.8	0.288309	0.270053		52.8	-537.132	-579.479		52.8	-0.0068	-0.00491	-0.00529	-0.0068	-0.00604	-0.00604	-0.00264	-0.00604		52.8	-10.2756	-32.695	-53.5575	-90.6118	-65.7013	-49.8209	-54.4916
52.9	0.241678	0.272009		52.9	-537.754	-579.791		52.9	-0.00755	-0.00151	-0.00227	-0.00491	-0.00604	-0.00491	-0.0068	-0.00227		52.9	-7.78452	-36.1202	-52.3119	-94.0369	-65.0786	-52.0006	-54.1802
53	0.222248	0.25049		53	-536.197	-574.809		53	-0.01133	-0.00453	-0.00642	-0.00529	-0.00604	-0.00491	-0.00566	-0.00529		53	-6.85037	-29.2698	-52.0006	-90.6118	-70.0606	-50.1323	-57.294
53.1	0.245564	0.228971		53.1	-538.688	-569.827		53.1	-0.00869	-0.00566	-0.0068	-0.00642	-0.00415	-0.00604	-0.00491	-0.00453		53.1	-6.53899	-30.5153	-47.3299	-88.4321	-69.4379	-50.1323	-51.6892
53.2	0.264993	0.238753		53.2	-532.149	-557.683		53.2	-0.00944	-0.00566	-0.00944	-0.00755	-0.00566	-0.00453	-0.0034	-0.00227		53.2	-7.47313	-27.0901	-43.5933	-94.9711	-72.2403	-53.8688	-51.3778
53.3	0.284423	0.246578		53.3	-532.149	-567.024		53.3	-0.00755	-0.00755	-0.00604	-0.00604	-0.00491	-0.00415	-0.00566	-0.00378		53.3	-6.53899	-28.647	-37.6771	-88.4321	-68.8151	-51.0664	-51.6892
53.4	0.280537	0.230928		53.4	-530.904	-576.366		53.4	-0.00793	-0.00378	-0.00755	-0.00793	-0.00755	-0.00264	-0.0034	-0.00755		53.4	-6.85037	-29.2698	-42.9705	-86.2524	-69.4379	-51.6892	-49.8209
53.5	0.323282	0.246578		53.5	-528.413	-576.366		53.5	-0.0102	-0.00529	-0.00491	-0.00642	-0.00604	-0.00227	-0.00529	-0.00378		53.5	-8.0959	-26.156	-42.9705	-87.1866	-75.0427	-57.9168	-52.3119
53.6	0.338826	0.258316		53.6	-524.988	-567.958		53.6	-0.00755	-0.00755	-0.00718	-0.00453	-0.00604	-0.00302	-0.00415	-0.00453		53.6	-9.03004	-28.0243	-45.773	-81.2703	-79.7134	-58.2282	-47.6412
53.7	0.346598	0.25049		53.7	-525.299	-559.24		53.7	-0.00642	-0.00491	-0.00642	-0.00718	-0.00378	-0.00529	-0.00302	-0.00378		53.7	-4.98209	-28.647	-47.3299	-85.9411	-75.6655	-57.9168	-46.7071
53.8	0.33494	0.262228		53.8	-527.79	-557.06		53.8	-0.00755	-0.000755	-0.00755	-0.0068	-0.00529	-0.0068	-0.00529	-0.00302		53.8	-6.53899	-27.7129	-45.773	-83.45	-76.5996	-55.4258	-51.0664
53.9	0.303853	0.279835		53.9	-530.904	-560.485		53.9	-0.01095	-0.00604	-0.00793	-0.00302	-0.00793	-0.00529	-0.00529	-0.00718		53.9	-7.16175	-24.9104	-45.1502	-84.6955	-75.0427	-59.4737	-46.3957
54	0.261107	0.281791		54	-533.084	-558.617		54	-0.00944	-0.00604	-0.00453	-0.00755	-0.00529	-0.00755	-0.00415	-0.00302		54	-7.16175	-29.8925	-39.5453	-86.2524	-71.9289	-61.0306	-51.3778
54.1	0.245564	0.299397		54.1	-533.395	-557.683		54.1	-0.00831	-0.00604	-0.00869	-0.00529	-0.00378	-0.00189	-0.00453	-0.00378		54.1	-9.03004	-32.3836	-41.1022	-88.7435	-72.8631	-65.7013	-50.4437
54.2	0.288309	0.281791		54.2	-528.102	-553.635		54.2	-0.01133	-0.00453	-0.00831	-0.00718	-0.00755	-0.0034	-0.0034	-0.00491		54.2	-7.47313	-30.5153	-40.4795	-91.8573	-76.2883	-64.1444	-48.8868
54.3	0.288309	0.268097		54.3	-517.515	-552.078		54.3	-0.01057	-0.00529	-0.0068	-0.00189	-0.00604	-0.00869	-0.00566	-0.00378		54.3	-7.47313	-30.2039	-38.2998	-87.1866	-74.42	-66.9468	-44.5274
54.4	0.272765	0.264184		54.4	-514.401	-556.749		54.4	-0.00378	0.000378	-0.00566	-0.00604	-0.0034	-0.00453	-0.00227	-0.00453		54.4	-9.03004	-28.0243	-42.0364	-87.8093	-72.8631	-65.3899	-45.4616
54.5	0.280537	0.268097		54.5	-517.515	-549.898		54.5	-0.01208	-0.00566	-0.00755	-0.00642	-0.00529	-0.00415	-0.00604	-0.00491		54.5	-8.0959	-31.7608	-47.3299	-88.4321	-77.5338	-64.1444	-45.1502
54.6	0.276651	0.279835		54.6	-527.79	-547.096		54.6	-0.00944	-0.00453	-0.00755	-0.00831	-0.00755	-0.00264	-0.00227	-0.00642		54.6	-6.22761	-29.5812	-47.0185	-91.5459	-79.0907	-60.4078	-52.0006
54.7	0.323282	0.291572		54.7	-531.527	-557.683		54.7	-0.00642	-0.00529	-0.00415	-0.0068	-0.00755	-0.0068	-0.00302	-0.00189		54.7	-9.34142	-26.7787	-39.234	-83.1386	-81.8931	-61.9647	-47.9526
54.8	0.323282	0.293528		54.8	-530.593	-570.761		54.8	-0.00831	-0.00566	-0.00755	-0.00642	-0.00378	-0.00604	-0.00491	-0.0068		54.8	-5.29347	-26.4674	-37.9884	-95.9052	-73.7972	-62.2761	-47.3299
54.9	0.303853	0.299397		54.9	-531.215	-562.665		54.9	-0.0102	-0.00604	-0.00982	-0.00566	-0.00793	-0.00604	-0.00302	-0.00378		54.9	-7.78452	-27.0901	-36.4315	-94.9711	-73.1744	-66.3241	-44.5274
55	0.315511	0.305266		55	-531.838	-563.599		55	-0.00944	-0.00793	-0.00604	-0.00642	-0.0034	-0.00529	-0.00227	-0.00529		55	-11.8325	-25.8446	-36.1202	-78.1565	-73.1744	-65.0786	-45.773
55.1	0.315511	0.291572		55.1	-529.97	-567.336		55.1	-0.00944	-0.00604	-0.00302	-0.00453	-0.00566	-0.00491	-0.00378	-0.00453		55.1	-7.47313	-25.5332	-40.4795	-75.3541	-69.7493	-64.1444	-43.9047
55.2	0.272765	0.285703		55.2	-536.82	-564.222		55.2	-0.0102	-0.00491	-0.00529	-0.00642	-0.0034	-0.00453	-0.00453	-0.00227		55.2	-6.22761	-22.7308	-38.9226	-79.0907	-71.9289	-68.1924	-41.725
55.3	0.284423	0.281791		55.3	-539	-558.305		55.3	-0.00869	-0.00718	-0.00604	-0.0068	-0.00302	-0.00227	-0.00453	-0.0068		55.3	-7.47313	-25.5332	-39.234	-80.0248	-77.8452	-56.9827	-42.6591
55.4	0.33494	0.30331		55.4	-531.215	-556.437		55.4	-0.00453	-0.00642	-0.00718	-0.00302	-0.00566	-0.0068	-0.00302	-0.00566		55.4	-6.53899	-26.156	-39.5453	-80.3362	-75.6655	-53.8688	-46.7071
55.5	0.342712	0.309179		55.5	-526.856	-558.928		55.5	-0.00793	-0.00378	-0.00566	-0.00604	-0.00453	-0.00491	-0.00415	-0.0034		55.5	-6.53899	-23.9763	-43.9047	-78.1565	-71.9289	-53.2461	-42.0364
55.6	0.327168	0.330698		55.6	-525.61	-552.078		55.6	-0.00718	-0.00529	-0.00831	-0.00227	-0.00642	-0.00491	-0.00415	-0.0034		55.6	-8.0959	-24.5991	-38.2998	-80.0248	-70.0606	-52.0006	-40.1681
55.7	0.303853	0.315048		55.7	-521.251	-546.162		55.7	-0.01095	-0.00642	-0.00529	-0.00604	-0.00529	-0.00755	-0.0034	-0.00529		55.7	-8.0959	-26.156	-36.7429	-78.4679	-75.9769	-52.0006	-44.8388
55.8	0.307739	0.309179		55.8	-513.155	-554.569		55.8	-0.01095	-0.00604	-0.0068	-0.00869	-0.00264	-0.00415	-0.00491	-0.0068		55.8	-8.71866	-18.0601	-37.0543	-80.959	-75.6655	-50.4437	-39.8567
55.9	0.284423	0.301354		55.9	-512.221	-555.192		55.9	-0.00944	-0.00529	-0.00906	-0.00604	-0.0034	-0.00642	-0.00302	-0.00302		55.9	-7.78452	-21.1739	-34.5632	-76.2883	-68.1924	-47.9526	-42.6591
56	0.284423	0.289616		56	-513.467	-550.832		56	-0.00529	-0.00642	-0.00566	-0.00642	-0.00529	-0.00227	-0.00302	-0.00378		56	-8.71866	-26.4674	-38.9226	-78.7793	-70.372	-48.8868	-43.5933
56.1	0.358256	0.299397		56.1	-514.712	-547.407		56.1	-0.0102	-0.00755	-0.00566	-0.00982	-0.00415	-0.00453	-0.00378	-0.00415		56.1	-9.96418	-23.6649	-39.5453	-77.5338	-68.1924	-50.755	-45.773
56.2	0.346598	0.301354		56.2	-515.646	-550.832		56.2	-0.00982	-0.00491	-0.00604	-0.00642	-0.000755	-0.00302	-0.00415	-0.00566		56.2	-9.03004	-26.7787	-36.4315	-80.959	-67.5696	-45.1502	-41.4136
56.3	0.33494	0.293528		56.3	-521.563	-554.88		56.3	-0.01057	-0.00415	-0.00906	-0.00491	-0.00604	-0.00529	-0.00302	-0.00529		56.3	-7.47313	-28.9584	-39.5453	-79.7134	-70.0606	-51.6892	-37.9884
56.4	0.338826	0.293528		56.4	-523.742	-553.635		56.4	-0.00718	-0.00566	-0.00642	-0.00566	-0.00491	-0.00566	-0.00264	-0.00604		56.4	-7.16175	-29.2698	-38.2998	-81.5817	-67.5696	-51.3778	-40.4795
56.5	0.342712	0.313091		56.5	-528.413	-550.832		56.5	-0.00944	-0.00491	-0.00529	-0.00415	-0.00604	-0.00831	-0.00453	-0.00453		56.5	-8.71866	-27.0901	-41.1022	-82.5159	-60.4078	-53.8688	-42.9705
56.6	0.307739	0.309179		56.6	-520.628	-556.126		56.6	-0.01284	-0.00566	-0.00227	-0.00453	-0.0034	-0.00453	-0.00189	-0.0068		56.6	-8.40728	-21.7966	-40.7909	-81.2703	-63.833	-49.8209	-44.8388
56.7	0.342712	0.33461		56.7	-520.94	-567.647		56.7	-0.00642	-0.00566	-0.00566	-0.00491	-0.00415	-0.00642	-0.00453	-0.00415		56.7	-9.96418	-30.5153	-41.1022	-80.0248	-60.7192	-48.264	-43.5933
56.8	0.377686	0.30331		56.8	-514.401	-565.156		56.8	-0.00982	-0.00227	-0.00491	-0.00227	-0.0034	-0.0068	-0.00453	-0.00642		56.8	-9.6528	-29.8925	-42.0364	-77.5338	-61.6534	-41.725	-42.3478
56.9	0.385458	0.293528		56.9	-517.203	-563.599		56.9	-0.01171	-0.01171	-0.00793	-0.00755	-0.00491	-0.00415	-0.00151	-0.0034		56.9	-7.78452	-26.156	-39.5453	-79.0907	-58.2282	-41.4136	-39.234
57	0.346598	0.307222		57	-515.958	-556.749		57	-0.00831	-0.00566	-0.0068	-0.00529	-0.0034	-0.00566	-0.00453	-0.00415		57	-8.71866	-23.6649	-37.3657	-77.2224	-60.4078	-42.9705	-42.0364
57.1	0.303853	0.299397		57.1	-522.497	-553.635		57.1	-0.00869	-0.00642	-0.00566	-0.00718	-0.00302	-0.00793	-0.00604	-0.0034		57.1	-9.6528	-25.8446	-39.5453	-78.7793	-57.6054	-42.3478	-42.6591
57.2	0.366028	0.315048		57.2	-523.119	-565.467		57.2	-0.00982	-0.00604	-0.00302	-0.00604	-0.00793	-0.00642	-0.00151	-0.00302		57.2	-9.03004	-22.108	-37.3657	-80.0248	-54.803	-46.7071	-42.6591
57.3	0.412659	0.299397		57.3	-524.988	-566.713		57.3	-0.00831	-0.00453	-0.0068	-0.0034	-0.00264	-0.0068	-0.0034	-0.00755		57.3	-7.78452	-28.647	-36.4315	-77.8452	-56.3599	-41.4136	-40.7909
57.4	0.342712	0.305266		57.4	-525.61	-570.138		57.4	-0.00944	-0.00491	-0.00415	-0.00642	-0.00302	-0.00718	-0.00378	-0.00642		57.4	-7.16175	-25.5332	-34.2519	-80.6476	-60.0965	-42.6591	-39.5453
57.5	0.385458	0.30331		57.5	-536.509	-565.156		57.5	-0.01397	-0.0068	-0.00566	-0.00529	-0.00415	-0.00831	-0.00151	-0.00529		57.5	-7.16175	-26.7787	-36.4315	-79.4021	-63.5216	-42.3478	-45.773
57.6	0.377686	0.309179		57.6	-535.575	-558.928		57.6	-0.00906	-0.00453	-0.00944	-0.00869	-0.00378	-0.00491	-0.00264	-0.00566		57.6	-7.16175	-31.1381	-38.2998	-80.0248	-62.2761	-42.0364	-46.3957
57.7	0.369914	0.315048		57.7	-525.299	-549.587		57.7	-0.01095	-0.00529	-0.00529	-0.00718	-0.00378	-0.00529	-0.00378	-0.00529		57.7	-8.0959	-32.0722	-35.186	-81.2703	-57.6054	-45.1502	-50.4437
57.8	0.404887	0.320916		57.8	-515.958	-546.473		57.8	-0.00906	-0.01171	-0.00491	-0.00529	-0.00189	-0.00453	0.000378	-0.00566		57.8	-9.96418	-30.5153	-34.2519	-75.6655	-63.833	-42.0364	-50.1323
57.9	0.428203	0.326785		57.9	-512.221	-544.293		57.9	-0.00604	-0.00642	-0.00529	-0.00529	-0.00491	-0.00529	-0.000378	-0.00453		57.9	-8.0959	-30.2039	-37.9884	-78.1565	-74.42	-42.6591	-52.3119
58	0.350484	0.307222		58	-507.55	-543.671		58	-0.0102	-0.00604	-0.00264	-0.00604	-0.00529	-0.00604	-0.0034	-0.00755		58	-8.0959	-27.7129	-38.9226	-80.959	-70.0606	-44.8388	-53.5575
58.1	0.397115	0.320916		58.1	-515.024	-544.916		58.1	-0.01133	-0.00793	-0.00529	-0.00566	-0.0034	-0.00453	-0.00491	-0.00491		58.1	-10.8983	-29.8925	-37.9884	-82.2045	-67.2582	-45.1502	-47.9526
58.2	0.412659	0.33461		58.2	-520.006	-540.868		58.2	-0.00944	-0.0068	-0.00415	-0.00604	-0.00415	-0.00793	-0.00415	-0.00642		58.2	-9.03004	-32.695	-34.8746	-77.2224	-69.4379	-48.8868	-49.8209
58.3	0.443747	0.33461		58.3	-522.808	-535.575		58.3	-0.00831	-0.00566	-0.00566	-0.00529	-0.00151	-0.0068	-0.00415	-0.0068		58.3	-9.34142	-29.8925	-35.8088	-79.4021	-68.8151	-47.6412	-50.755
58.4	0.362142	0.336567		58.4	-524.365	-535.263		58.4	-0.00982	-0.00642	-0.00491	-0.00604	-0.00264	-0.0034	-0.00227	-0.00906		58.4	-10.5869	-29.2698	-31.4494	-78.1565	-64.4558	-51.6892	-45.1502
58.5	0.35437	0.31896		58.5	-522.497	-534.641		58.5	-0.01133	-0.00718	-0.00415	-0.00302	-0.00264	-0.00566	-0.0034	-0.00604		58.5	-9.6528	-26.156	-36.7429	-78.4679	-68.1924	-56.3599	-44.216
58.6	0.369914	0.326785		58.6	-516.269	-526.545		58.6	-0.00869	-0.00604	-0.00566	-0.00302	-0.00415	-0.00529	-0.00189	-0.00566		58.6	-10.2756	-31.4494	-35.4974	-75.6655	-71.6175	-47.6412	-47.6412
58.7	0.366028	0.311135		58.7	-518.137	-524.676		58.7	-0.00906	-0.00604	-0.00453	-0.00566	-0.00566	-0.00566	-0.00227	-0.00415		58.7	-13.7007	-32.0722	-34.2519	-74.42	-64.7672	-54.4916	-46.3957
58.8	0.323282	0.295485		58.8	-521.563	-534.641		58.8	-0.01208	-0.00642	-0.00491	-0.00453	-0.00264	-0.00529	-0.00264	-0.00189		58.8	-10.5869	-26.156	-39.234	-76.911	-62.8989	-46.0843	-49.8209
58.9	0.338826	0.326785		58.9	-529.347	-533.084		58.9	-0.01095	-0.00642	-0.00491	-0.00604	-0.000755	-0.00755	-0.000378	-0.00642		58.9	-11.5211	-24.9104	-37.6771	-71.3062	-69.7493	-48.8868	-49.5095
59	0.319397	0.311135		59	-532.461	-518.137		59	-0.00982	-0.0068	-0.000755	-0.00491	-0.0034	-0.00566	-0.00264	-0.00604		59	-12.4552	-27.0901	-37.9884	-67.2582	-68.1924	-55.1144	-52.3119
59.1	0.401001	0.317004		59.1	-523.119	-523.119		59.1	-0.0136	-0.00604	-0.00566	-0.0068	-0.00453	-0.00529	-0.00453	-0.00491		59.1	-11.5211	-34.5632	-34.2519	-68.1924	-67.5696	-53.8688	-51.0664
59.2	0.404887	0.315048		59.2	-522.185	-519.694		59.2	-0.00793	-0.00793	-0.00264	-0.00566	-0.00378	-0.00566	-0.0034	-0.00415		59.2	-11.5211	-33.3177	-37.3657	-70.0606	-71.9289	-52.3119	-53.2461
59.3	0.381572	0.295485		59.3	-526.233	-521.874		59.3	-0.0102	-0.00831	-0.00378	-0.00793	-0.00151	-0.0034	-0.00302	-0.00642		59.3	-12.4552	-30.5153	-33.3177	-64.7672	-75.6655	-57.9168	-49.5095
59.4	0.381572	0.293528		59.4	-526.856	-512.533		59.4	-0.0102	-0.00869	-0.00642	-0.00566	-0.00264	-0.00453	-0.0034	-0.00755		59.4	-11.8325	-29.2698	-36.4315	-67.5696	-70.6834	-62.2761	-49.5095
59.5	0.346598	0.270053		59.5	-527.79	-510.664		59.5	-0.01246	-0.00529	-0.00566	-0.00642	-0.00264	-0.00869	-0.00189	-0.00491		59.5	-11.2097	-30.2039	-37.3657	-66.3241	-66.6355	-63.2103	-51.6892
59.6	0.397115	0.277878		59.6	-524.988	-521.563		59.6	-0.00793	-0.00982	-0.0034	-0.00453	-0.00453	-0.00529	0.000378	-0.00453		59.6	-10.5869	-26.4674	-36.4315	-68.1924	-62.2761	-71.3062	-51.3778
59.7	0.389343	0.279835		59.7	-524.054	-516.892		59.7	-0.01057	-0.00566	-0.00453	-0.00604	-0.00642	-0.00944	-0.00378	-0.00793		59.7	-9.96418	-30.2039	-36.7429	-70.0606	-61.342	-61.9647	-52.3119
59.8	0.35437	0.285703		59.8	-520.94	-525.299		59.8	-0.01171	-0.00642	-0.00604	-0.00755	-0.0034	-0.0034	-0.00113	-0.00831		59.8	-10.2756	-30.5153	-33.3177	-70.372	-67.2582	-62.2761	-53.8688
59.9	0.408773	0.28766		59.9	-525.922	-529.97		59.9	-0.01133	-0.00642	-0.00415	-0.00453	-0.0034	-0.00415	-0.00302	-0.00453		59.9	-11.8325	-27.4015	-35.186	-72.2403	-66.3241	-62.5875	-48.8868
60	0.412659	0.289616		60	-530.593	-537.443		60	-0.01322	-0.00831	-0.00453	-0.00566	-0.00415	-0.00529	-0.0034	-0.00642		60	-10.2756	-26.7787	-33.0063	-70.0606	-63.5216	-62.8989	-53.5575
60.1	0.385458	0.307222		60.1	-529.658	-543.359		60.1	-0.0102	-0.00566	-0.00378	-0.00831	0.000378	-0.00302	-0.00227	-0.00529		60.1	-12.7666	-28.647	-33.6291	-70.372	-58.5396	-66.6355	-54.803
60.2	0.401001	0.297441		60.2	-520.628	-544.293		60.2	-0.00755	-0.00755	-0.00831	-0.00453	-0.000755	-0.00793	-0.00227	-0.00642		60.2	-13.7007	-24.5991	-30.8267	-70.372	-61.0306	-61.9647	-56.0485
60.3	0.393229	0.313091		60.3	-519.383	-549.275		60.3	-0.0102	-0.00869	-0.00491	-0.0068	-0.00151	-0.00378	-0.00264	-0.00378		60.3	-11.2097	-23.3535	-31.7608	-71.6175	-58.2282	-62.8989	-57.294
60.4	0.424317	0.320916		60.4	-515.024	-554.569		60.4	-0.0102	-0.00529	-0.00566	-0.00529	-0.00113	-0.00529	-0.00302	-0.00642		60.4	-9.96418	-22.4194	-33.6291	-74.1086	-58.8509	-61.6534	-58.5396
60.5	0.404887	0.324829		60.5	-514.401	-551.455		60.5	-0.0102	-0.00793	-0.00378	-0.00793	-0.000755	-0.00491	-0.000755	-0.0068		60.5	-8.71866	-21.7966	-35.4974	-73.1744	-62.2761	-59.7851	-61.9647
60.6	0.404887	0.31896		60.6	-515.958	-535.575		60.6	-0.01586	-0.00642	-0.00453	-0.00869	-0.00378	-0.00491	-0.00189	-0.0034		60.6	-9.96418	-26.7787	-41.1022	-71.6175	-60.4078	-61.9647	-59.1623
60.7	0.451519	0.309179		60.7	-515.024	-527.479		60.7	-0.00944	-0.0068	-0.00189	-0.00453	-0.00302	-0.00642	-0.000755	-0.00566		60.7	-8.0959	-21.7966	-41.725	-70.372	-62.8989	-64.4558	-60.7192
60.8	0.451519	0.328741		60.8	-519.383	-528.413		60.8	-0.00869	-0.0068	-0.00415	-0.00831	-0.00491	-0.0034	-0.00302	-0.0034		60.8	-7.47313	-18.6828	-43.5933	-72.5517	-58.8509	-65.3899	-60.7192
60.9	0.416545	0.317004		60.9	-516.892	-532.461		60.9	-0.01057	-0.00529	-0.00566	-0.00415	-0.000755	-0.00378	-0.000755	-0.00529		60.9	-8.0959	-24.2877	-38.9226	-71.3062	-61.9647	-66.9468	-57.294
61	0.447633	0.322873		61	-523.119	-526.233		61	-0.0102	-0.00529	-0.00378	-0.00718	0.000755	-0.00415	-0.00529	-0.00755		61	-3.73657	-27.7129	-38.9226	-67.5696	-60.7192	-66.9468	-58.5396
61.1	0.47872	0.315048		61.1	-522.808	-517.826		61.1	-0.01246	-0.0102	-0.00453	-0.00831	-0.00227	-0.00755	0.000755	-0.00415		61.1	-8.0959	-30.2039	-40.4795	-67.5696	-59.4737	-64.4558	-63.833
61.2	0.467062	0.31896		61.2	-513.155	-520.317		61.2	-0.00831	-0.00793	-0.00378	-0.00529	-0.00264	-0.00529	-0.000755	-0.00302		61.2	-6.53899	-28.647	-41.4136	-70.0606	-65.7013	-67.2582	-61.9647
61.3	0.451519	0.31896		61.3	-508.796	-518.449		61.3	-0.01057	-0.00793	-0.00642	-0.00755	-0.00491	-0.00453	-0.000378	-0.00529		61.3	-5.91623	-24.9104	-39.5453	-70.0606	-66.9468	-71.9289	-63.5216
61.4	0.455404	0.30331		61.4	-506.616	-524.988		61.4	-0.01133	-0.00566	-0.00415	-0.00566	-0.00302	-0.00529	-0.00227	-0.00264		61.4	-4.98209	-28.9584	-44.8388	-66.9468	-62.8989	-68.8151	-59.7851
61.5	0.474834	0.313091		61.5	-510.353	-530.281		61.5	-0.0102	-0.0068	-0.00378	-0.00793	-0.00566	-0.00453	-0.00227	-0.0068		61.5	-5.60485	-23.6649	-42.3478	-71.3062	-70.0606	-66.6355	-57.6054
61.6	0.381572	0.301354		61.6	-506.305	-528.102		61.6	-0.00944	-0.00793	-0.000755	-0.00642	-0.00302	-0.00378	-0.0034	-0.00529		61.6	-5.29347	-25.5332	-39.5453	-69.1265	-67.881	-71.9289	-57.6054
61.7	0.416545	0.299397		61.7	-511.287	-531.527		61.7	-0.0102	-0.0068	-0.00453	-0.00755	-0.00151	-0.00755	-0.00415	-0.00491		61.7	-4.67071	-24.2877	-46.0843	-72.2403	-65.7013	-68.5037	-58.5396
61.8	0.439861	0.299397		61.8	-517.826	-528.724		61.8	-0.0068	-0.01133	-0.00415	-0.00604	-0.00151	-0.00189	-0.00378	-0.00491		61.8	-7.78452	-23.3535	-44.5274	-80.3362	-66.9468	-67.881	-57.9168
61.9	0.45929	0.305266		61.9	-517.826	-532.461		61.9	-0.00755	-0.00604	-0.00189	-0.00793	-0.00491	-0.00491	-0.00264	-0.00227		61.9	-6.22761	-27.7129	-41.4136	-75.9769	-71.6175	-64.1444	-58.8509
62	0.474834	0.324829		62	-519.071	-534.641		62	-0.01057	-0.00944	-0.00302	-0.00642	-0.0034	-0.00491	-0.00491	-0.00378		62	-6.85037	-29.8925	-32.695	-70.0606	-63.833	-64.1444	-58.2282
62.1	0.494264	0.328741		62.1	-515.958	-525.299		62.1	-0.01133	-0.00453	-0.000755	-0.00453	-0.00264	-0.00415	-0.0034	-0.00529		62.1	-8.71866	-28.647	-37.9884	-72.8631	-63.5216	-64.4558	-63.5216
62.2	0.443747	0.309179		62.2	-521.874	-526.545		62.2	-0.00869	-0.01057	-0.00378	-0.0068	-0.00151	-0.00566	-0.00302	-0.00566		62.2	-7.16175	-30.8267	-42.3478	-75.9769	-67.881	-57.6054	-61.6534
62.3	0.432089	0.336567		62.3	-523.119	-536.197		62.3	-0.01171	-0.00604	-0.00264	-0.00755	-0.00378	-0.00491	-0.00453	-0.00566		62.3	-8.0959	-33.6291	-38.2998	-80.6476	-65.0786	-58.8509	-57.9168
62.4	0.412659	0.328741		62.4	-514.712	-532.772		62.4	-0.00944	-0.00944	-0.00378	-0.00604	-0.00566	-0.00642	-0.00302	-0.00302		62.4	-8.0959	-34.5632	-41.1022	-75.0427	-66.3241	-65.0786	-57.294
62.5	0.393229	0.324829		62.5	-522.497	-525.922		62.5	-0.01057	-0.0068	-0.00453	-0.00869	-0.00415	-0.00566	-0.00378	-0.00415		62.5	-5.29347	-31.4494	-42.6591	-71.9289	-60.7192	-68.8151	-52.0006
62.6	0.45929	0.322873		62.6	-524.676	-525.299		62.6	-0.0102	-0.00453	-0.00566	-0.00718	-0.00302	-0.00529	-0.00302	-0.00566		62.6	-6.22761	-37.9884	-41.1022	-80.0248	-59.7851	-62.8989	-51.6892
62.7	0.49815	0.352217		62.7	-533.395	-522.497		62.7	-0.00944	-0.00793	-0.00415	-0.01057	-0.0034	-0.00227	-0.00151	-0.00227		62.7	-5.29347	-36.4315	-41.4136	-82.5159	-55.4258	-66.3241	-56.0485
62.8	0.47872	0.354173		62.8	-533.706	-521.251		62.8	-0.00642	-0.0136	-0.00491	-0.00906	0.000755	-0.00491	-0.00264	-0.00378		62.8	-6.22761	-33.9405	-42.6591	-77.2224	-63.5216	-61.6534	-57.9168
62.9	0.401001	0.342435		62.9	-528.102	-521.874		62.9	-0.00944	-0.00529	-0.0068	-0.00793	-0.00113	-0.00415	-0.00604	-0.00453		62.9	-6.53899	-35.186	-43.2819	-82.8272	-66.0127	-59.7851	-57.294
63	0.502036	0.360042		63	-521.874	-530.281		63	-0.0102	-0.00831	-0.00264	-0.00453	-0.00302	-0.00566	-0.00378	-0.0034		63	-8.0959	-37.6771	-44.216	-80.0248	-65.0786	-54.4916	-59.7851
63.1	0.486492	0.356129		63.1	-514.712	-524.365		63.1	-0.01133	-0.00453	-0.00151	-0.00793	-0.00566	-0.00491	-0.00189	-0.00453		63.1	-8.0959	-40.4795	-44.5274	-80.3362	-65.3899	-56.6713	-65.0786
63.2	0.455404	0.324829		63.2	-512.533	-520.628		63.2	-0.00793	-0.0068	-0.00189	-0.0068	-0.00642	-0.00189	-0.00491	-0.00378		63.2	-8.40728	-40.1681	-43.5933	-85.3183	-66.6355	-58.2282	-63.2103
63.3	0.470948	0.328741		63.3	-517.203	-523.119		63.3	-0.01057	-0.00906	-0.00566	-0.01057	-0.00415	-0.00378	-0.00189	-0.00529		63.3	-6.53899	-38.6112	-39.234	-88.4321	-62.5875	-55.4258	-63.2103
63.4	0.463176	0.342435		63.4	-518.449	-521.251		63.4	-0.01057	-0.0068	-0.00378	-0.00566	-0.00378	-0.00415	-0.00227	-0.00151		63.4	-3.73657	-37.3657	-37.6771	-84.3841	-59.1623	-56.6713	-58.2282
63.5	0.455404	0.33461		63.5	-521.251	-528.102		63.5	-0.01208	-0.00415	-0.00227	-0.0102	-0.00453	-0.00529	-0.00491	-0.00378		63.5	-8.0959	-37.3657	-39.234	-84.0728	-59.4737	-56.9827	-52.9347
63.6	0.45929	0.322873		63.6	-520.006	-531.215		63.6	-0.01208	-0.0102	-0.00302	-0.00529	-0.00453	-0.00491	-0.00302	-0.00415		63.6	-4.98209	-39.234	-33.9405	-80.3362	-59.7851	-53.8688	-53.8688
63.7	0.45929	0.336567		63.7	-521.251	-526.856		63.7	-0.00718	-0.01133	-0.00302	-0.00869	-0.00264	-0.00604	-0.00453	-0.00378		63.7	-8.0959	-44.8388	-34.8746	-84.3841	-61.0306	-52.0006	-56.6713
63.8	0.439861	0.338523		63.8	-524.365	-523.742		63.8	-0.00906	-0.00491	-0.00415	-0.01095	-0.00604	-0.00491	-0.00604	-0.00227		63.8	-6.53899	-42.3478	-35.186	-85.0069	-54.1802	-51.6892	-54.803
63.9	0.443747	0.33461		63.9	-516.269	-522.185		63.9	-0.00869	-0.00415	-0.00302	-0.00415	-0.00264	0.000755	-0.00189	-0.00642		63.9	-5.60485	-42.0364	-35.4974	-82.5159	-54.4916	-48.8868	-59.7851
64	0.443747	0.324829		64	-510.353	-522.185		64	-0.0102	-0.00831	-0.00491	-0.00604	-0.00529	-0.0034	-0.00264	-0.0034		64	-4.35933	-42.6591	-28.3356	-80.0248	-59.7851	-53.8688	-63.2103
64.1	0.482606	0.330698		64.1	-505.994	-513.467		64.1	-0.0102	-0.01133	-0.00415	-0.00793	-0.00378	-0.00529	-0.00227	-0.00264		64.1	-5.60485	-42.3478	-26.4674	-85.0069	-59.7851	-57.6054	-65.3899
64.2	0.467062	0.330698		64.2	-511.287	-516.58		64.2	-0.00869	-0.00642	-0.00151	-0.01095	-0.00453	-0.00491	-0.00415	-0.00189		64.2	-3.73657	-43.5933	-34.2519	-92.1687	-54.803	-52.6233	-67.2582
64.3	0.404887	0.320916		64.3	-517.515	-535.263		64.3	-0.00944	-0.00491	-0.00189	-0.00718	-0.00378	-0.00264	-0.00491	-0.00378		64.3	-4.35933	-41.725	-39.234	-88.4321	-62.2761	-53.8688	-69.1265
64.4	0.463176	0.309179		64.4	-522.497	-540.245		64.4	-0.00831	-0.00831	-0.00453	-0.00755	-0.0068	-0.00453	-0.0034	-0.00264		64.4	-5.91623	-41.725	-38.9226	-88.1207	-62.5875	-53.5575	-68.5037
64.5	0.470948	0.297441		64.5	-523.742	-534.641		64.5	-0.00982	-0.00944	-0.00415	-0.00906	-0.00378	-0.00453	-0.00566	-0.00302		64.5	-2.17966	-36.7429	-36.7429	-90.3004	-56.9827	-53.5575	-64.1444
64.6	0.47872	0.25049		64.6	-520.94	-529.347		64.6	-0.0102	-0.00906	-0.00566	-0.00982	-0.00227	-0.000378	-0.00378	-0.00604		64.6	-4.67071	-36.4315	-35.4974	-87.8093	-52.6233	-51.3778	-61.9647
64.7	0.393229	0.20354		64.7	-510.664	-528.102		64.7	-0.00982	-0.00755	-0.00566	-0.0068	-0.00189	-0.00453	-0.00302	-0.00453		64.7	-4.04795	-28.647	-28.9584	-87.498	-53.5575	-48.5754	-61.6534
64.8	0.470948	0.23484		64.8	-507.862	-522.497		64.8	-0.00831	-0.00529	-0.00415	-0.00718	-0.00378	-0.00604	-0.0034	-0.000378		64.8	-6.22761	-31.7608	-31.4494	-87.498	-54.803	-47.9526	-62.2761
64.9	0.443747	0.258316		64.9	-510.664	-515.958		64.9	-0.00982	-0.00793	-0.00415	-0.01095	-0.00604	-0.00604	-0.00491	-0.0034		64.9	-5.60485	-30.8267	-32.695	-81.2703	-61.9647	-47.6412	-61.342
65	0.416545	0.258316		65	-519.383	-517.515		65	-0.00642	-0.00453	-0.00302	-0.00869	-0.00415	-0.00189	-0.00378	-0.00491		65	-4.35933	-29.8925	-37.0543	-80.959	-58.2282	-49.8209	-63.5216
65.1	0.428203	0.23484		65.1	-518.137	-512.533		65.1	-0.00793	-0.00831	-0.00453	-0.00642	-0.0034	-0.00151	-0.00529	-0.00264		65.1	-8.71866	-25.2218	-40.7909	-82.8272	-63.2103	-51.3778	-64.7672
65.2	0.45929	0.232884		65.2	-518.76	-501.634		65.2	-0.00869	-0.0102	-0.0034	-0.01171	-0.00529	-0.00529	-0.00415	-0.00529		65.2	-8.40728	-35.186	-37.0543	-80.0248	-61.342	-51.3778	-63.833
65.3	0.389343	0.215277		65.3	-514.089	-490.424		65.3	-0.00869	-0.00642	-0.00302	-0.00793	-0.00415	-0.00566	-0.00415	-0.00491		65.3	-6.53899	-29.5812	-43.5933	-83.45	-61.0306	-47.3299	-63.2103
65.4	0.432089	0.209409		65.4	-515.335	-493.538		65.4	-0.00982	-0.00566	-0.00378	-0.00982	-0.00264	-0.00264	-0.00378	-0.00189		65.4	-6.22761	-25.2218	-39.8567	-85.0069	-55.1144	-50.4437	-70.0606
65.5	0.416545	0.221146		65.5	-523.119	-494.472		65.5	-0.00793	-0.00642	-0.0034	-0.00906	-0.00529	-0.00378	-0.00378	-0.00415		65.5	-4.67071	-27.7129	-40.1681	-83.7614	-58.8509	-48.8868	-67.5696
65.6	0.463176	0.23484		65.6	-521.563	-496.341		65.6	-0.00491	-0.0068	-0.00604	-0.00906	-0.00793	-0.00378	-0.00378	-0.00566		65.6	-4.98209	-28.9584	-39.5453	-81.2703	-56.3599	-51.6892	-65.0786
65.7	0.447633	0.238753		65.7	-521.563	-501.946		65.7	-0.00982	-0.00755	-0.00227	-0.00604	-0.0068	-0.00227	-0.00453	-0.0034		65.7	-4.98209	-28.3356	-44.8388	-88.1207	-54.4916	-49.5095	-67.2582
65.8	0.451519	0.248534		65.8	-524.988	-496.963		65.8	-0.00906	-0.00604	-0.00378	-0.0068	-0.0034	-0.00264	-0.00378	-0.00453		65.8	-4.98209	-29.2698	-45.1502	-89.989	-55.1144	-47.3299	-70.9948
65.9	0.432089	0.299397		65.9	-523.119	-500.389		65.9	-0.00718	-0.00529	-0.00189	-0.0102	-0.00566	-0.00453	-0.00491	-0.00227		65.9	-3.73657	-28.3356	-44.216	-85.3183	-52.0006	-54.4916	-69.1265
66	0.47872	0.297441		66	-524.054	-497.586		66	-0.00755	-0.00869	-0.00302	-0.00491	-0.00302	-0.00378	-0.00566	-0.00189		66	-3.73657	-30.8267	-39.5453	-85.3183	-52.6233	-50.1323	-68.8151
66.1	0.47872	0.283747		66.1	-521.251	-492.293		66.1	-0.00831	-0.00491	-0.00491	-0.00982	-0.00906	-0.00529	-0.00491	-0.00264		66.1	-4.98209	-29.5812	-37.9884	-87.1866	-56.6713	-56.0485	-67.5696
66.2	0.451519	0.268097		66.2	-516.269	-477.658		66.2	-0.00906	-0.00604	-0.00529	-0.01095	-0.00604	-0.00755	-0.00566	-0.00378		66.2	-5.60485	-28.647	-41.725	-89.0549	-52.6233	-56.6713	-69.1265
66.3	0.451519	0.279835		66.3	-517.203	-482.017		66.3	-0.00906	-0.00944	-0.00529	-0.00944	-0.0068	-0.000378	-0.00566	-0.00264		66.3	-6.53899	-26.4674	-39.5453	-84.0728	-53.2461	-54.4916	-63.833
66.4	0.404887	0.291572		66.4	-520.006	-502.568		66.4	-0.0068	-0.0068	-0.00264	-0.00906	-0.00415	-0.00151	-0.00189	-0.00264		66.4	-6.53899	-25.5332	-35.4974	-85.6297	-54.1802	-53.2461	-63.5216
66.5	0.474834	0.293528		66.5	-521.563	-495.095		66.5	-0.0068	-0.00755	-0.0034	-0.0102	-0.00718	-0.0034	-0.00453	-0.00415		66.5	-8.71866	-24.9104	-39.8567	-95.2825	-52.9347	-55.7371	-61.0306
66.6	0.470948	0.275922		66.6	-512.533	-500.389		66.6	-0.00831	-0.0068	-0.00227	-0.0102	-0.00566	-0.0034	-0.00566	-0.00378		66.6	-7.16175	-23.0422	-38.2998	-94.0369	-54.803	-55.4258	-59.1623
66.7	0.490378	0.254403		66.7	-511.287	-504.125		66.7	-0.00869	-0.00831	-0.00491	-0.0102	-0.00113	-0.00529	-0.00529	-0.00264		66.7	-5.91623	-25.5332	-33.0063	-84.0728	-58.5396	-52.3119	-62.8989
66.8	0.463176	0.262228		66.8	-512.533	-506.616		66.8	-0.00755	-0.00566	-0.00378	-0.00906	-0.00491	-0.00227	-0.00491	-0.00529		66.8	-3.42519	-28.0243	-28.9584	-82.5159	-58.8509	-53.5575	-63.5216
66.9	0.463176	0.275922		66.9	-519.383	-509.107		66.9	-0.00831	-0.0068	-0.0034	-0.00982	-0.00566	-0.00151	-0.00491	-0.00869		66.9	-6.85037	-26.7787	-34.8746	-83.7614	-59.7851	-53.5575	-61.6534
67	0.467062	0.277878		67	-524.365	-510.664		67	-0.00642	-0.00831	-0.00415	-0.00718	-0.00529	-0.00529	-0.00491	-0.00189		67	-9.03004	-26.7787	-36.1202	-84.0728	-64.4558	-49.1981	-62.5875
67.1	0.439861	0.277878		67.1	-522.497	-517.515		67.1	-0.00793	-0.00529	-0.00529	-0.00982	-0.00793	-0.0034	-0.00415	-0.00453		67.1	-7.78452	-28.3356	-40.1681	-87.8093	-68.1924	-52.0006	-62.5875
67.2	0.447633	0.293528		67.2	-521.563	-524.676		67.2	-0.00718	-0.00415	-0.00227	-0.00869	-0.00453	-0.00302	-0.00415	-0.00264		67.2	-6.53899	-22.108	-38.9226	-93.7256	-56.3599	-51.3778	-62.2761
67.3	0.385458	0.281791		67.3	-518.449	-517.203		67.3	-0.01208	-0.00869	-0.00189	-0.01171	-0.00604	-0.00453	-0.00718	-0.00227		67.3	-6.53899	-23.6649	-40.1681	-84.6955	-67.2582	-47.9526	-62.5875
67.4	0.385458	0.30331		67.4	-530.281	-507.55		67.4	-0.00906	-0.00642	-0.00718	-0.00869	-0.00604	-0.0034	-0.00604	-0.00227		67.4	-9.6528	-28.0243	-32.695	-85.3183	-64.1444	-49.1981	-61.6534
67.5	0.435975	0.309179		67.5	-524.365	-499.766		67.5	-0.00566	-0.00604	-0.00604	-0.0102	-0.00491	-0.00264	-0.00491	-0.00415		67.5	-6.53899	-27.0901	-36.1202	-89.6776	-61.9647	-44.8388	-58.2282
67.6	0.424317	0.281791		67.6	-510.976	-502.257		67.6	-0.00869	-0.00718	-0.00491	-0.0068	-0.00793	-0.00302	-0.00566	-0.00302		67.6	-6.53899	-29.2698	-33.0063	-82.2045	-58.2282	-43.2819	-58.5396
67.7	0.424317	0.273966		67.7	-515.024	-502.88		67.7	-0.00378	-0.00642	-0.000755	-0.0068	-0.00642	-0.00302	-0.00491	0.000755		67.7	-9.03004	-31.4494	-33.6291	-77.2224	-62.2761	-41.4136	-59.7851
67.8	0.443747	0.244622		67.8	-525.299	-513.155		67.8	-0.0102	-0.00491	-0.00604	-0.00604	-0.00189	-0.00491	-0.00491	-0.00189		67.8	-7.47313	-25.2218	-33.3177	-76.2883	-71.6175	-44.216	-56.9827
67.9	0.428203	0.227015		67.9	-529.97	-518.449		67.9	-0.00869	-0.00755	-0.00529	-0.01095	-0.00642	-0.0034	-0.00415	-0.00453		67.9	-9.03004	-28.9584	-30.2039	-77.8452	-72.2403	-43.5933	-54.803
68	0.404887	0.240709		68	-529.036	-512.533		68	-0.00755	-0.00604	-0.00302	-0.00642	-0.0068	-0.00227	-0.00189	-0.00189		68	-8.40728	-27.7129	-33.0063	-75.3541	-68.5037	-47.3299	-58.8509
68.1	0.350484	0.227015		68.1	-524.054	-516.58		68.1	-0.00906	-0.00529	-0.00227	-0.0068	-0.00642	-0.00189	-0.00113	-0.00264		68.1	-7.78452	-27.0901	-37.6771	-78.7793	-69.1265	-42.6591	-58.8509
68.2	0.408773	0.213321		68.2	-524.988	-514.401		68.2	-0.0068	-0.00529	-0.00566	-0.00944	-0.00415	-0.00415	-0.00491	-0.000755		68.2	-9.03004	-23.6649	-37.3657	-85.3183	-69.1265	-44.5274	-55.1144
68.3	0.408773	0.248534		68.3	-521.874	-512.221		68.3	-0.00642	-0.00755	-0.00415	-0.00604	-0.00869	-0.000755	-0.00453	-0.0034		68.3	-8.40728	-26.4674	-39.234	-82.8272	-66.9468	-46.3957	-54.803
68.4	0.435975	0.256359		68.4	-515.646	-510.664		68.4	-0.00529	-0.00906	-0.00642	-0.01095	-0.00793	-0.00189	-0.00491	-0.00264		68.4	-9.34142	-25.2218	-33.0063	-82.5159	-65.7013	-47.6412	-49.5095
68.5	0.350484	0.272009		68.5	-515.024	-515.958		68.5	-0.00793	-0.00529	-0.00415	-0.01057	-0.00529	-0.00604	-0.0068	-0.00378		68.5	-8.71866	-23.9763	-33.9405	-88.1207	-67.5696	-46.0843	-58.5396
68.6	0.463176	0.289616		68.6	-517.515	-526.856		68.6	-0.00906	-0.00566	-0.00529	-0.00793	-0.00755	-0.00529	-0.00718	-0.00264		68.6	-7.47313	-24.5991	-36.1202	-84.3841	-62.2761	-44.216	-61.0306
68.7	0.428203	0.273966		68.7	-515.335	-524.988		68.7	-0.00906	-0.0068	-0.00453	-0.00566	-0.00718	-0.000755	-0.00755	-0.0034		68.7	-7.16175	-29.5812	-37.9884	-81.5817	-64.1444	-46.7071	-58.2282
68.8	0.369914	0.273966		68.8	-508.796	-531.215		68.8	-0.00755	-0.00642	-0.00491	-0.00831	-0.00378	-0.00378	-0.00491	-0.00227		68.8	-6.22761	-23.6649	-41.725	-79.0907	-61.342	-44.8388	-60.7192
68.9	0.393229	0.246578		68.9	-516.58	-531.215		68.9	-0.01057	-0.00831	-0.00566	-0.01057	-0.00755	-0.00453	-0.00566	-0.00529		68.9	-8.0959	-26.156	-39.234	-75.0427	-56.6713	-46.3957	-58.8509
69	0.401001	0.23484		69	-525.61	-527.79		69	-0.0068	-0.00604	-0.00604	-0.00906	-0.00869	-0.00189	-0.00453	-0.0034		69	-8.71866	-19.3056	-41.725	-78.7793	-59.4737	-46.3957	-62.8989
69.1	0.377686	0.232884		69.1	-525.922	-530.904		69.1	-0.00415	-0.00378	-0.00491	-0.00869	-0.00718	-0.00642	-0.00491	-0.00302		69.1	-9.34142	-21.7966	-38.2998	-81.5817	-58.2282	-46.7071	-60.4078
69.2	0.385458	0.23484		69.2	-521.563	-516.892		69.2	-0.00755	-0.00529	-0.00793	-0.0068	-0.00642	-0.00415	-0.00415	-0.0034		69.2	-10.2756	-25.2218	-37.0543	-81.2703	-60.0965	-45.1502	-57.6054
69.3	0.315511	0.260272		69.3	-522.808	-510.976		69.3	-0.00566	-0.00227	-0.00793	-0.00529	-0.00755	-0.00302	-0.0068	-0.00302		69.3	-8.0959	-20.2397	-39.234	-75.9769	-62.2761	-43.9047	-58.5396
69.4	0.377686	0.256359		69.4	-519.694	-515.335		69.4	-0.00642	-0.00453	-0.00718	-0.01133	-0.00604	-0.00529	-0.00755	-0.00264		69.4	-8.71866	-23.6649	-38.9226	-83.45	-64.1444	-44.216	-54.803
69.5	0.350484	0.25049		69.5	-512.533	-522.497		69.5	-0.00755	-0.00529	-0.00566	-0.00755	-0.00642	-0.00189	-0.00453	-0.00604		69.5	-12.1438	-25.5332	-37.6771	-83.45	-62.8989	-44.8388	-59.4737
69.6	0.389343	0.262228		69.6	-503.191	-511.287		69.6	-0.00906	-0.00529	-0.00415	-0.00755	-0.00566	-0.00378	-0.00529	-0.00264		69.6	-11.8325	-25.2218	-36.4315	-82.2045	-66.6355	-47.3299	-58.5396
69.7	0.369914	0.305266		69.7	-501.323	-508.796		69.7	-0.0068	-0.00415	-0.00642	-0.00793	-0.00302	-0.00491	-0.00453	-0.00189		69.7	-9.34142	-24.2877	-35.4974	-79.4021	-62.8989	-47.6412	-55.4258
69.8	0.366028	0.297441		69.8	-500.7	-505.059		69.8	-0.00566	-0.00755	-0.00604	-0.00793	-0.00529	-0.00302	-0.00415	0		69.8	-7.16175	-23.9763	-37.3657	-80.3362	-69.7493	-42.9705	-56.3599
69.9	0.33494	0.293528		69.9	-497.275	-492.293		69.9	-0.00869	-0.00566	-0.00642	-0.00869	-0.00491	-0.00378	-0.00415	0		69.9	-8.0959	-21.1739	-37.9884	-85.3183	-67.5696	-46.3957	-50.755
70	0.366028	0.289616		70	-493.227	-483.574		70	-0.00604	-0.00642	-0.00831	-0.00982	-0.00566	-0.0034	-0.00491	-0.00302		70	-9.03004	-24.5991	-42.0364	-82.8272	-75.0427	-43.5933	-52.9347
70.1	0.342712	0.305266		70.1	-502.568	-483.885		70.1	-0.00982	-0.00302	-0.0068	-0.00604	-0.0068	-0.00227	-0.00453	-0.00491		70.1	-8.0959	-24.2877	-44.8388	-83.45	-74.1086	-46.0843	-55.7371
70.2	0.350484	0.262228		70.2	-506.616	-472.053		70.2	-0.00604	-0.00529	-0.00529	-0.00566	-0.00604	-0.00415	-0.00529	-0.00264		70.2	-8.0959	-27.7129	-43.5933	-81.8931	-75.9769	-49.1981	-55.7371
70.3	0.331054	0.293528		70.3	-505.371	-478.903		70.3	-0.00869	-0.00566	-0.00453	-0.00982	-0.00831	-0.00529	-0.00718	-0.00415		70.3	-6.53899	-26.7787	-41.725	-82.2045	-72.2403	-44.8388	-55.7371
70.4	0.342712	0.30331		70.4	-503.502	-477.969		70.4	-0.0102	-0.0068	-0.00755	-0.00755	-0.0068	-0.00793	-0.00642	-0.00189		70.4	-7.78452	-24.5991	-41.1022	-75.9769	-71.6175	-43.5933	-54.1802
70.5	0.362142	0.281791		70.5	-494.161	-471.119		70.5	-0.00944	-0.00415	-0.0034	-0.00453	-0.00755	-0.00302	-0.00378	-0.00227		70.5	-9.6528	-29.5812	-41.725	-75.0427	-69.7493	-47.0185	-54.4916
70.6	0.292195	0.301354		70.6	-499.455	-477.658		70.6	-0.00453	-0.00831	-0.00227	-0.00604	-0.00869	-0.00264	-0.00227	-0.00491		70.6	-9.96418	-27.0901	-42.9705	-82.2045	-70.372	-43.5933	-56.3599
70.7	0.319397	0.313091		70.7	-500.389	-480.149		70.7	-0.00869	-0.00302	-0.00869	-0.0102	-0.00264	-0.00529	-0.00415	-0.00113		70.7	-9.6528	-28.647	-43.5933	-77.2224	-72.8631	-47.0185	-56.6713
70.8	0.35437	0.305266		70.8	-498.832	-474.855		70.8	-0.00869	-0.00453	-0.00566	-0.0068	-0.00869	-0.00378	-0.00378	-0.00378		70.8	-8.0959	-30.2039	-37.6771	-78.4679	-66.0127	-50.4437	-61.0306
70.9	0.315511	0.305266		70.9	-493.227	-478.281		70.9	-0.00566	-0.00415	-0.00831	-0.00642	-0.00869	-0.00264	-0.00378	-0.00264		70.9	-9.03004	-33.3177	-34.2519	-82.2045	-69.7493	-52.0006	-55.1144
71	0.307739	0.311135		71	-501.323	-476.412		71	-0.00415	-0.00604	-0.00415	-0.0068	-0.00869	-0.00604	-0.00566	-0.00151		71	-9.03004	-26.7787	-40.4795	-84.0728	-63.2103	-50.1323	-57.9168
71.1	0.311625	0.277878		71.1	-506.928	-481.706		71.1	-0.00793	-0.00302	-0.00491	-0.00906	-0.00453	-0.00491	-0.00718	-0.00415		71.1	-7.78452	-23.0422	-45.4616	-82.5159	-63.5216	-48.5754	-62.8989
71.2	0.292195	0.273966		71.2	-503.191	-486.999		71.2	-0.00944	-0.0068	-0.00491	-0.00869	-0.0068	-0.00227	-0.00491	-0.00302		71.2	-9.6528	-26.7787	-37.9884	-84.0728	-64.1444	-46.0843	-65.7013
71.3	0.303853	0.260272		71.3	-501.634	-489.49		71.3	-0.01133	-0.00642	-0.00604	-0.00755	-0.00642	-0.0034	-0.00793	-0.00302		71.3	-7.78452	-28.3356	-39.234	-84.6955	-59.4737	-41.4136	-65.3899
71.4	0.311625	0.260272		71.4	-503.191	-486.688		71.4	-0.01057	-0.00642	-0.00642	-0.00793	-0.00755	-0.00415	-0.00491	-0.00415		71.4	-8.40728	-28.0243	-44.5274	-82.2045	-57.6054	-43.9047	-61.9647
71.5	0.311625	0.238753		71.5	-500.389	-471.742		71.5	-0.00566	-0.00869	-0.00453	-0.00453	-0.00491	-0.00491	-0.00566	-0.00302		71.5	-9.03004	-24.2877	-43.2819	-77.8452	-54.803	-47.6412	-63.5216
71.6	0.307739	0.272009		71.6	-495.407	-475.478		71.6	-0.0102	-0.00566	-0.00718	-0.01095	-0.00491	-0.00755	-0.00415	-0.00566		71.6	-6.53899	-25.5332	-35.8088	-81.2703	-58.2282	-41.725	-58.8509
71.7	0.307739	0.277878		71.7	-492.916	-480.772		71.7	-0.00642	-0.0068	-0.00566	-0.00755	-0.00491	-0.00264	-0.00453	-0.0034		71.7	-6.22761	-28.647	-32.0722	-80.959	-51.6892	-41.725	-56.6713
71.8	0.366028	0.275922		71.8	-499.455	-481.083		71.8	-0.00944	-0.00491	-0.00755	-0.00642	-0.00302	-0.00189	-0.00906	-0.00302		71.8	-7.16175	-28.9584	-33.0063	-79.7134	-49.8209	-40.4795	-58.8509
71.9	0.3738	0.262228		71.9	-505.371	-473.921		71.9	-0.01057	-0.00227	-0.0068	-0.00906	-0.0068	-0.00566	-0.00453	-0.00453		71.9	-7.16175	-27.4015	-33.0063	-86.2524	-53.2461	-40.1681	-59.1623
72	0.292195	0.277878		72	-500.389	-479.838		72	-0.01171	-0.00302	-0.00604	-0.00906	-0.00982	-0.00378	-0.00302	-0.00151		72	-7.16175	-26.7787	-35.4974	-87.8093	-54.4916	-44.216	-59.1623
72.1	0.315511	0.295485		72.1	-494.161	-478.903		72.1	-0.00869	-0.00566	-0.0068	-0.00831	-0.00491	-0.00604	-0.00453	-0.00529		72.1	-7.16175	-24.2877	-37.6771	-87.1866	-63.833	-49.1981	-55.1144
72.2	0.303853	0.305266		72.2	-491.981	-481.394		72.2	-0.01095	-0.00566	-0.0068	-0.00491	-0.0068	-0.00755	-0.0034	-0.00453		72.2	-9.96418	-26.4674	-32.0722	-86.8752	-57.9168	-56.6713	-61.9647
72.3	0.307739	0.277878		72.3	-491.981	-485.442		72.3	-0.00982	-0.00529	-0.00944	-0.00642	-0.00378	-0.00529	-0.00415	-0.00302		72.3	-7.78452	-27.0901	-36.1202	-83.7614	-56.6713	-52.6233	-57.294
72.4	0.319397	0.273966		72.4	-499.455	-490.424		72.4	-0.00755	-0.00491	-0.00944	-0.00529	-0.00604	-0.00869	-0.00604	-0.00264		72.4	-8.71866	-26.7787	-35.4974	-84.0728	-57.294	-47.0185	-54.803
72.5	0.327168	0.264184		72.5	-501.634	-495.718		72.5	-0.00566	-0.00566	-0.00566	-0.0068	-0.00642	-0.00302	-0.00566	-0.0034		72.5	-9.34142	-24.5991	-31.7608	-77.5338	-55.1144	-43.9047	-58.5396
72.6	0.311625	0.266141		72.6	-502.88	-490.113		72.6	-0.00793	-0.00264	-0.00415	-0.00604	-0.0068	-0.00491	-0.00529	-0.00378		72.6	-9.96418	-29.5812	-33.0063	-83.45	-46.0843	-42.0364	-56.9827
72.7	0.315511	0.301354		72.7	-506.305	-481.083		72.7	-0.0102	-0.00642	-0.000755	-0.0068	-0.00869	-0.0034	-0.00491	-0.00453		72.7	-7.16175	-27.0901	-33.6291	-83.45	-54.4916	-43.5933	-54.4916
72.8	0.315511	0.315048		72.8	-500.389	-477.035		72.8	-0.00831	-0.00755	-0.00453	-0.00529	-0.0068	-0.00491	-0.00491	-0.00529		72.8	-6.22761	-28.3356	-28.3356	-80.3362	-52.6233	-44.216	-51.3778
72.9	0.307739	0.289616		72.9	-506.928	-474.855		72.9	-0.00604	-0.0034	-0.000755	-0.00906	-0.00604	-0.00453	-0.00189	-0.00453		72.9	-6.22761	-27.0901	-27.4015	-77.5338	-52.3119	-43.9047	-50.755
73	0.24945	0.301354		73	-507.55	-472.676		73	-0.00982	-0.00793	-0.00604	-0.00642	-0.00491	-0.00302	-0.00491	-0.00642		73	-8.0959	-25.8446	-31.1381	-88.7435	-52.0006	-47.3299	-60.4078
73.1	0.268879	0.313091		73.1	-512.533	-475.478		73.1	-0.00869	-0.00604	-0.01133	-0.00755	-0.00453	-0.00604	-0.00529	-0.00453		73.1	-6.85037	-21.7966	-32.695	-91.8573	-54.1802	-46.3957	-55.1144
73.2	0.264993	0.332654		73.2	-521.874	-475.478		73.2	-0.00869	-0.00491	-0.00793	-0.00453	-0.00604	-0.00604	-0.00566	-0.00378		73.2	-9.03004	-25.5332	-32.3836	-91.8573	-56.3599	-46.3957	-59.4737
73.3	0.292195	0.350261		73.3	-535.886	-468.316		73.3	-0.00604	-0.00415	-0.00642	-0.00755	-0.00566	-0.00189	-0.00491	-0.00378		73.3	-8.71866	-27.4015	-28.0243	-88.1207	-54.1802	-47.6412	-59.1623
73.4	0.323282	0.358086		73.4	-534.018	-474.233		73.4	-0.00793	-0.00453	-0.00869	-0.00869	-0.00378	-0.00227	-0.00415	-0.00604		73.4	-9.96418	-26.4674	-32.0722	-89.989	-58.8509	-48.264	-58.5396
73.5	0.327168	0.332654		73.5	-522.808	-469.251		73.5	-0.00755	-0.00529	-0.00755	-0.00755	-0.00906	-0.00566	-0.00302	-0.00415		73.5	-11.5211	-22.108	-29.8925	-90.6118	-57.6054	-42.9705	-56.9827
73.6	0.261107	0.356129		73.6	-520.628	-459.909		73.6	-0.01095	-0.00491	-0.00755	-0.00642	-0.0068	-0.00566	-0.00415	-0.00227		73.6	-9.6528	-24.2877	-28.9584	-89.3662	-57.294	-43.2819	-56.3599
73.7	0.323282	0.354173		73.7	-514.712	-458.041		73.7	-0.00831	-0.00302	-0.00831	-0.00642	-0.00642	-0.00415	-0.0034	-0.00453		73.7	-8.40728	-22.4194	-27.7129	-88.7435	-60.0965	-45.773	-57.294
73.8	0.299967	0.338523		73.8	-511.598	-458.975		73.8	-0.0068	-0.00566	-0.0034	-0.00453	-0.00378	-0.00415	-0.00264	-0.00755		73.8	-8.40728	-24.2877	-18.6828	-87.8093	-60.0965	-47.0185	-54.803
73.9	0.307739	0.348304		73.9	-508.173	-467.694		73.9	-0.00906	-0.00415	-0.00906	-0.00831	-0.00566	-0.00378	-0.00453	-0.00378		73.9	-9.6528	-31.4494	-19.9284	-88.4321	-59.7851	-48.8868	-50.4437
74	0.292195	0.344392		74	-506.305	-481.394		74	-0.01057	-0.00453	-0.00831	-0.00793	-0.00491	-0.00415	-0.00415	-0.00529		74	-6.85037	-31.1381	-16.1918	-85.0069	-57.294	-58.2282	-56.9827
74.1	0.288309	0.328741		74.1	-510.664	-482.017		74.1	-0.0068	-0.00378	-0.00755	-0.00566	-0.00491	-0.0068	-0.00604	-0.00604		74.1	-6.85037	-32.0722	-15.2577	-85.0069	-65.0786	-55.1144	-58.8509
74.2	0.35437	0.338523		74.2	-514.089	-481.394		74.2	-0.0068	-0.00453	-0.00604	-0.00491	-0.00604	-0.00491	-0.00529	-0.00264		74.2	-10.5869	-31.7608	-17.1259	-85.9411	-62.2761	-44.5274	-52.0006
74.3	0.296081	0.320916		74.3	-520.317	-479.526		74.3	-0.01095	-0.00491	-0.0068	-0.00529	-0.00453	-0.0068	-0.00415	-0.00566		74.3	-9.34142	-28.9584	-17.7487	-80.959	-65.3899	-45.773	-53.5575
74.4	0.342712	0.328741		74.4	-517.203	-474.855		74.4	-0.00982	-0.00604	-0.00604	-0.00604	-0.0068	-0.00453	-0.00302	-0.00227		74.4	-9.03004	-27.7129	-18.6828	-80.3362	-62.2761	-48.5754	-54.4916
74.5	0.401001	0.336567		74.5	-514.712	-473.61		74.5	-0.00831	-0.00415	-0.00604	-0.00793	-0.00415	-0.00453	-0.00453	-0.00566		74.5	-9.6528	-26.4674	-21.7966	-77.5338	-54.4916	-50.755	-48.264
74.6	0.331054	0.33461		74.6	-509.419	-469.251		74.6	-0.01133	-0.00264	-0.00566	-0.00755	-0.00378	-0.00604	-0.00453	-0.00302		74.6	-7.78452	-26.7787	-18.6828	-79.7134	-53.5575	-48.264	-49.1981
74.7	0.327168	0.352217		74.7	-516.58	-463.334		74.7	-0.00869	-0.00642	-0.00718	-0.00604	-0.0068	-0.00378	-0.00415	-0.00529		74.7	-8.71866	-28.3356	-17.7487	-72.2403	-57.9168	-46.3957	-47.9526
74.8	0.303853	0.33461		74.8	-509.73	-473.299		74.8	-0.00906	-0.00906	-0.00453	-0.00642	-0.0034	-0.00453	-0.00453	-0.00378		74.8	-6.53899	-28.647	-21.1739	-75.9769	-61.6534	-53.8688	-52.0006
74.9	0.315511	0.31896		74.9	-511.91	-476.412		74.9	-0.00755	-0.00869	-0.00944	-0.00227	-0.00642	-0.00566	-0.0034	-0.00755		74.9	-8.0959	-27.0901	-15.569	-72.5517	-59.7851	-53.8688	-51.6892
75	0.35437	0.309179		75	-520.94	-477.346		75	-0.00869	-0.00453	-0.00793	-0.00453	-0.00264	-0.00566	-0.00264	-0.00491		75	-9.34142	-28.3356	-18.6828	-70.0606	-60.4078	-55.4258	-52.3119
75.1	0.331054	0.293528		75.1	-523.431	-470.496		75.1	-0.01171	-0.00378	-0.00604	-0.0068	-0.00529	-0.00529	-0.00529	-0.00264		75.1	-9.34142	-27.0901	-25.5332	-70.9948	-65.0786	-47.9526	-54.1802
75.2	0.311625	0.322873		75.2	-522.497	-467.382		75.2	-0.00982	-0.00566	-0.00755	-0.00529	-0.00718	-0.00718	-0.0034	-0.00529		75.2	-9.03004	-25.2218	-23.9763	-72.2403	-62.2761	-47.3299	-55.4258
75.3	0.350484	0.320916		75.3	-524.676	-469.251		75.3	-0.00944	-0.00529	-0.00793	-0.00415	-0.00415	-0.00604	-0.00227	-0.00415		75.3	-10.2756	-31.4494	-25.5332	-69.4379	-59.4737	-42.9705	-52.9347
75.4	0.369914	0.309179		75.4	-523.742	-459.598		75.4	-0.0102	-0.00566	-0.00718	-0.00755	-0.00415	-0.00491	-0.0034	-0.00604		75.4	-9.6528	-29.2698	-31.1381	-70.0606	-54.803	-47.6412	-52.3119
75.5	0.346598	0.305266		75.5	-517.826	-458.975		75.5	-0.0102	-0.00793	-0.00793	-0.00378	-0.00604	-0.00566	-0.00453	-0.00604		75.5	-7.16175	-28.9584	-28.647	-66.9468	-53.5575	-49.5095	-51.6892
75.6	0.362142	0.307222		75.6	-508.485	-465.825		75.6	-0.00869	-0.00491	-0.0034	-0.00189	-0.00604	-0.00604	-0.00529	-0.00529		75.6	-9.34142	-29.5812	-24.5991	-70.372	-59.7851	-48.8868	-47.6412
75.7	0.311625	0.307222		75.7	-502.88	-472.676		75.7	-0.00906	-0.00453	-0.01095	-0.00831	-0.00378	-0.00529	-0.00264	-0.00264		75.7	-6.53899	-28.647	-26.156	-68.1924	-63.2103	-49.5095	-42.0364
75.8	0.288309	0.305266		75.8	-510.976	-482.951		75.8	-0.0102	-0.00529	-0.00566	-0.00906	-0.00227	-0.00831	-0.0034	-0.0034		75.8	-9.6528	-30.2039	-24.5991	-66.6355	-58.2282	-47.3299	-43.2819
75.9	0.327168	0.30331		75.9	-510.976	-479.215		75.9	-0.00982	-0.00566	-0.00642	-0.00378	-0.00453	-0.0034	-0.00415	-0.00415		75.9	-8.40728	-33.3177	-28.9584	-64.7672	-57.6054	-46.3957	-44.8388
76	0.299967	0.299397		76	-508.173	-474.855		76	-0.01284	-0.00718	-0.00982	-0.0068	-0.00566	-0.00264	-0.00189	-0.00529		76	-8.40728	-33.6291	-27.7129	-66.3241	-56.6713	-43.9047	-46.0843
76.1	0.311625	0.28766		76.1	-504.437	-477.658		76.1	-0.00982	-0.00604	-0.00227	-0.00453	-0.00378	-0.00415	-0.00227	-0.00529		76.1	-8.0959	-37.3657	-25.5332	-61.9647	-59.4737	-47.3299	-46.0843
76.2	0.319397	0.307222		76.2	-501.011	-477.346		76.2	-0.01057	-0.00529	-0.00566	-0.00718	-0.00378	-0.00378	-0.00227	-0.00944		76.2	-9.34142	-38.6112	-21.4853	-60.0965	-61.9647	-51.3778	-47.9526
76.3	0.311625	0.336567		76.3	-511.287	-481.083		76.3	-0.01057	-0.00604	-0.00793	-0.00415	-0.00529	-0.00604	-0.00453	-0.00642		76.3	-8.71866	-39.5453	-21.4853	-61.342	-57.6054	-53.8688	-42.3478
76.4	0.366028	0.326785		76.4	-516.269	-478.903		76.4	-0.01095	-0.00642	-0.00755	-0.00491	-0.0034	-0.00755	-0.00415	-0.00378		76.4	-9.03004	-41.725	-19.9284	-64.1444	-61.342	-54.1802	-44.5274
76.5	0.362142	0.340479		76.5	-523.431	-472.987		76.5	-0.01473	-0.00529	-0.00566	-0.00529	-0.00415	-0.0068	-0.00227	-0.00944		76.5	-9.03004	-41.725	-21.1739	-65.3899	-59.1623	-49.1981	-47.3299
76.6	0.299967	0.326785		76.6	-515.958	-482.017		76.6	-0.01246	-0.00491	-0.00491	-0.00604	-0.00642	-0.00642	-0.00227	-0.00264		76.6	-10.2756	-42.0364	-29.2698	-72.8631	-56.0485	-51.3778	-42.0364
76.7	0.303853	0.320916		76.7	-511.91	-474.233		76.7	-0.00869	-0.00642	-0.00793	-0.00302	-0.00529	-0.00529	-0.00302	-0.00491		76.7	-10.2756	-40.1681	-25.2218	-71.9289	-54.1802	-51.6892	-41.4136
76.8	0.342712	0.326785		76.8	-515.958	-470.185		76.8	-0.01246	-0.00642	-0.00566	-0.00529	-0.000378	-0.00831	-0.00378	-0.00718		76.8	-8.71866	-39.5453	-27.7129	-71.9289	-62.8989	-53.2461	-39.234
76.9	0.385458	0.311135		76.9	-513.467	-473.61		76.9	-0.00906	-0.0068	-0.00604	-0.00529	-0.00302	-0.00642	-0.0034	-0.00302		76.9	-9.96418	-41.725	-28.0243	-70.0606	-59.7851	-54.803	-42.0364
77	0.33494	0.315048		77	-505.682	-469.562		77	-0.01095	-0.00453	-0.00906	-0.00227	-0.00302	-0.00529	-0.00491	-0.00491		77	-9.34142	-37.0543	-32.3836	-68.8151	-57.6054	-56.3599	-36.7429
77.1	0.369914	0.311135		77.1	-502.568	-468.628		77.1	-0.00944	-0.0068	-0.00831	-0.00453	-0.00415	-0.00604	-0.00264	-0.0068		77.1	-9.96418	-37.6771	-33.6291	-73.4858	-52.9347	-50.4437	-38.9226
77.2	0.381572	0.307222		77.2	-505.371	-458.664		77.2	-0.00755	-0.0068	-0.00264	-0.00566	-0.0068	-0.00566	-0.00642	-0.00529		77.2	-8.71866	-33.6291	-30.2039	-68.8151	-56.6713	-44.5274	-37.9884
77.3	0.358256	0.309179		77.3	-512.221	-462.089		77.3	-0.01397	-0.00491	-0.00642	-0.00189	-0.00529	-0.00491	-0.00264	-0.00529		77.3	-9.34142	-33.0063	-32.3836	-66.9468	-61.342	-50.4437	-35.4974
77.4	0.381572	0.315048		77.4	-512.533	-461.466		77.4	-0.01057	-0.00604	-0.00642	-0.00453	-0.00378	-0.00793	0	-0.0068		77.4	-6.85037	-37.6771	-34.8746	-68.5037	-60.7192	-49.1981	-39.234
77.5	0.346598	0.31896		77.5	-510.664	-467.071		77.5	-0.01624	-0.00566	-0.00491	-0.00755	-0.00302	-0.00604	-0.00151	-0.00793		77.5	-10.8983	-34.2519	-31.4494	-63.833	-57.9168	-47.3299	-40.4795
77.6	0.385458	0.317004		77.6	-506.616	-466.137		77.6	-0.01246	-0.00906	-0.00755	-0.00415	-0.00227	-0.0068	-0.00415	-0.00453		77.6	-8.40728	-36.7429	-36.4315	-62.2761	-59.1623	-42.9705	-38.9226
77.7	0.346598	0.309179		77.7	-509.73	-461.466		77.7	-0.00982	-0.00491	-0.00453	-0.00378	-0.00378	-0.00227	-0.00151	-0.00604		77.7	-9.6528	-33.0063	-36.1202	-61.342	-62.2761	-45.1502	-43.2819
77.8	0.3738	0.309179		77.8	-510.353	-459.909		77.8	-0.00793	-0.0068	-0.00566	-0.00302	-0.00566	-0.00491	-0.00264	-0.00566		77.8	-10.2756	-34.2519	-32.3836	-65.3899	-68.5037	-53.2461	-39.8567
77.9	0.408773	0.338523		77.9	-511.598	-463.646		77.9	-0.00869	-0.00529	-0.0068	-0.00453	-0.00453	-0.00491	-0.00378	-0.0034		77.9	-9.96418	-32.695	-30.5153	-69.1265	-61.9647	-52.6233	-40.1681
78	0.3738	0.315048		78	-511.287	-470.807		78	-0.01171	-0.00566	-0.00906	-0.00869	-0.00415	-0.00302	-0.00302	-0.00566		78	-8.71866	-34.2519	-27.4015	-69.1265	-61.342	-51.6892	-40.1681
78.1	0.346598	0.311135		78.1	-506.928	-472.987		78.1	-0.00869	-0.00453	-0.00415	-0.00264	-0.00453	-0.00831	-0.00378	-0.00604		78.1	-9.96418	-39.8567	-30.5153	-72.2403	-56.9827	-48.8868	-45.4616
78.2	0.366028	0.324829		78.2	-508.173	-477.346		78.2	-0.01171	-0.00529	-0.00453	-0.00529	-0.00151	-0.00529	-0.00415	-0.00604		78.2	-6.22761	-40.4795	-28.3356	-70.6834	-56.3599	-45.1502	-46.3957
78.3	0.369914	0.309179		78.3	-510.664	-488.556		78.3	-0.01095	-0.00831	-0.00491	-0.00869	-0.00227	-0.000755	-0.00529	-0.00982		78.3	-8.0959	-37.0543	-23.3535	-74.1086	-58.2282	-48.264	-45.1502
78.4	0.401001	0.311135		78.4	-509.73	-490.113		78.4	-0.01284	-0.0068	-0.00529	-0.00491	-0.0034	-0.00604	-0.00264	-0.00529		78.4	-8.71866	-37.6771	-25.5332	-76.2883	-53.2461	-47.6412	-53.5575
78.5	0.397115	0.297441		78.5	-514.401	-488.868		78.5	-0.01057	-0.00869	-0.00604	-0.00378	-0.00491	-0.0102	-0.00264	-0.00718		78.5	-6.85037	-35.186	-23.6649	-69.7493	-52.6233	-49.1981	-58.8509
78.6	0.3738	0.266141		78.6	-520.94	-480.772		78.6	-0.01133	-0.00755	-0.00604	-0.00529	-0.0068	-0.00604	-0.00151	-0.00566		78.6	-9.34142	-34.2519	-31.4494	-67.2582	-50.755	-47.9526	-56.0485
78.7	0.331054	0.25049		78.7	-514.712	-483.263		78.7	-0.00944	-0.00604	-0.00604	-0.00529	0	-0.00453	-0.00151	-0.00529		78.7	-7.47313	-35.186	-31.7608	-68.8151	-51.3778	-45.4616	-52.9347
78.8	0.284423	0.246578		78.8	-511.287	-480.149		78.8	-0.01171	-0.00491	-0.00491	-0.00453	-0.00189	-0.00604	-0.00227	-0.00453		78.8	-8.40728	-33.0063	-29.8925	-64.4558	-47.3299	-42.9705	-56.0485
78.9	0.366028	0.25049		78.9	-514.401	-476.412		78.9	-0.00906	-0.00491	-0.00604	-0.00415	-0.00264	-0.00378	-0.00189	-0.00453		78.9	-7.78452	-33.9405	-29.8925	-64.7672	-51.6892	-42.3478	-55.1144
79	0.362142	0.256359		79	-512.221	-481.394		79	-0.01435	-0.0102	-0.00453	-0.00529	-0.00302	-0.00529	-0.0034	-0.0068		79	-7.78452	-34.8746	-23.3535	-61.6534	-48.264	-46.7071	-54.4916
79.1	0.346598	0.260272		79.1	-505.994	-480.149		79.1	-0.01133	-0.00755	-0.00529	-0.00378	-0.00566	-0.00869	-0.00415	-0.00604		79.1	-9.34142	-29.2698	-28.0243	-63.5216	-49.1981	-46.7071	-53.2461
79.2	0.362142	0.272009		79.2	-503.814	-481.083		79.2	-0.00906	-0.0068	-0.00227	-0.00831	-0.00302	-0.0068	-0.00227	-0.00491		79.2	-11.2097	-29.5812	-26.156	-64.7672	-47.9526	-46.7071	-49.1981
79.3	0.350484	0.258316		79.3	-504.125	-465.514		79.3	-0.01171	-0.0068	-0.00529	-0.00453	-0.000755	-0.00415	-0.00264	-0.00604		79.3	-7.78452	-22.7308	-26.7787	-59.1623	-50.1323	-42.0364	-51.3778
79.4	0.338826	0.283747		79.4	-512.533	-460.843		79.4	-0.01208	-0.00755	-0.00453	-0.00755	-0.00302	-0.00566	-0.0034	-0.00453		79.4	-8.71866	-25.8446	-29.2698	-58.8509	-50.4437	-45.4616	-53.2461
79.5	0.408773	0.313091		79.5	-516.269	-471.742		79.5	-0.01171	-0.00755	-0.0034	-0.00529	-0.00189	-0.00491	-0.00227	-0.00718		79.5	-10.2756	-27.7129	-28.647	-58.2282	-47.6412	-44.8388	-58.2282
79.6	0.401001	0.301354		79.6	-519.383	-476.412		79.6	-0.01095	-0.00529	-0.00378	-0.00491	-0.00415	-0.00642	-0.000755	-0.00415		79.6	-9.6528	-27.4015	-27.4015	-62.2761	-47.3299	-46.7071	-53.8688
79.7	0.404887	0.28766		79.7	-511.598	-482.64		79.7	-0.00869	-0.00869	-0.00604	-0.00264	-0.00529	-0.00718	0.000378	-0.00642		79.7	-7.78452	-25.5332	-28.9584	-61.0306	-48.264	-42.9705	-57.294
79.8	0.369914	0.285703		79.8	-509.73	-473.61		79.8	-0.00906	-0.00944	-0.00642	-0.00793	-0.0034	-0.00566	-0.000755	-0.00302		79.8	-7.47313	-29.2698	-27.7129	-56.3599	-53.5575	-43.5933	-63.833
79.9	0.323282	0.273966		79.9	-508.485	-457.418		79.9	-0.01171	-0.00491	-0.00264	-0.00869	-0.00529	-0.00491	-0.00189	-0.00566		79.9	-6.53899	-30.2039	-26.4674	-55.1144	-56.0485	-42.3478	-55.1144
80	0.366028	0.272009		80	-520.317	-448.388		80	-0.00793	-0.0068	-0.00378	-0.00604	-0.00227	-0.00529	-0.00264	-0.00302		80	-8.0959	-30.2039	-25.2218	-56.6713	-52.3119	-39.8567	-60.4078
80.1	0.3738	0.295485		80.1	-521.251	-448.077		80.1	-0.00831	-0.00944	-0.00642	-0.0068	-0.00151	-0.00566	-0.00453	-0.00793		80.1	-4.35933	-28.647	-24.2877	-55.4258	-52.3119	-47.0185	-58.5396
80.2	0.420431	0.289616		80.2	-529.97	-457.73		80.2	-0.01397	-0.00642	-0.00491	-0.00642	-0.00264	-0.00793	-0.00415	-0.00793		80.2	-6.85037	-28.3356	-21.4853	-50.4437	-51.6892	-46.7071	-60.0965
80.3	0.366028	0.317004		80.3	-524.676	-457.73		80.3	-0.00944	-0.00793	-0.00415	-0.00491	0.00151	-0.0068	-0.00227	-0.0034		80.3	-7.47313	-24.9104	-22.4194	-54.803	-53.5575	-45.773	-60.7192
80.4	0.35437	0.31896		80.4	-521.251	-457.107		80.4	-0.00944	-0.0068	-0.00453	-0.0068	-0.00302	-0.00189	-0.00227	-0.00566		80.4	-8.40728	-29.5812	-24.2877	-56.6713	-56.0485	-45.773	-54.4916
80.5	0.346598	0.311135		80.5	-524.365	-450.879		80.5	-0.01397	-0.00944	-0.00378	-0.00906	-0.00378	-0.00453	-0.00189	-0.00604		80.5	-5.91623	-27.4015	-19.9284	-54.4916	-55.7371	-45.4616	-61.342
80.6	0.350484	0.30331		80.6	-519.694	-453.682		80.6	-0.01133	-0.00869	-0.00415	-0.00491	-0.00491	-0.00415	-0.00302	-0.00302		80.6	-7.47313	-26.4674	-24.5991	-60.7192	-53.5575	-47.3299	-58.8509
80.7	0.404887	0.305266		80.7	-523.431	-443.717		80.7	-0.00831	-0.00755	-0.00566	-0.00453	-0.00227	-0.00642	-0.00189	-0.00529		80.7	-6.53899	-24.9104	-23.9763	-60.0965	-53.5575	-47.6412	-61.9647
80.8	0.404887	0.301354		80.8	-518.137	-437.801		80.8	-0.00869	-0.00642	-0.00113	-0.00491	-0.00264	-0.00642	-0.00189	-0.00793		80.8	-6.53899	-31.4494	-22.4194	-62.2761	-51.6892	-47.3299	-60.4078
80.9	0.307739	0.320916		80.9	-508.485	-433.442		80.9	-0.01397	-0.00982	-0.0034	-0.00831	-0.00302	-0.0068	-0.00189	-0.00491		80.9	-6.53899	-30.2039	-24.5991	-66.3241	-46.0843	-48.264	-58.5396
81	0.350484	0.313091		81	-510.976	-431.885		81	-0.0102	-0.00755	-0.00378	-0.00642	-0.00189	-0.00566	-0.00415	-0.00604		81	-7.16175	-29.5812	-20.2397	-69.7493	-44.8388	-47.9526	-63.2103
81.1	0.412659	0.309179		81.1	-515.335	-427.526		81.1	-0.01095	-0.0068	-0.00529	-0.00906	0	-0.00302	-0.00302	-0.00415		81.1	-9.34142	-31.7608	-26.156	-66.6355	-49.8209	-49.5095	-66.0127
81.2	0.3738	0.317004		81.2	-515.335	-423.478		81.2	-0.01171	-0.00642	-0.00491	-0.00831	-0.00189	-0.00378	-0.00189	-0.00718		81.2	-6.22761	-34.8746	-28.647	-68.1924	-52.0006	-49.8209	-61.9647
81.3	0.401001	0.338523		81.3	-522.185	-430.328		81.3	-0.00944	-0.00529	-0.00264	-0.00604	-0.00302	-0.00491	-0.00378	-0.00755		81.3	-7.78452	-34.5632	-27.7129	-78.7793	-52.6233	-50.1323	-63.833
81.4	0.397115	0.311135		81.4	-519.694	-442.472		81.4	-0.0102	-0.0068	-0.00491	-0.00453	-0.0034	-0.0068	-0.00491	-0.00453		81.4	-7.78452	-37.0543	-28.0243	-76.2883	-53.5575	-48.5754	-62.8989
81.5	0.393229	0.315048		81.5	-522.808	-440.604		81.5	-0.00793	-0.00831	-0.00529	-0.00793	-0.00302	-0.00227	-0.0034	-0.00415		81.5	-6.85037	-33.9405	-30.2039	-69.7493	-53.5575	-43.9047	-61.0306
81.6	0.362142	0.307222		81.6	-525.61	-440.604		81.6	-0.01208	-0.00604	-0.00529	-0.00491	-0.00604	-0.00529	-0.00189	-0.00529		81.6	-8.0959	-37.6771	-27.7129	-67.2582	-53.8688	-47.6412	-59.1623
81.7	0.338826	0.315048		81.7	-516.892	-441.849		81.7	-0.00566	-0.00906	-0.00189	-0.00755	-0.00642	-0.00906	-0.0034	-0.00151		81.7	-7.47313	-36.7429	-27.7129	-70.0606	-52.0006	-51.3778	-51.3778
81.8	0.350484	0.356129		81.8	-517.203	-432.508		81.8	-0.00869	-0.0068	-0.00415	-0.00718	-0.00189	-0.0068	-0.00491	-0.00566		81.8	-9.03004	-35.4974	-23.6649	-66.9468	-49.5095	-51.0664	-53.2461
81.9	0.292195	0.342435		81.9	-520.628	-432.819		81.9	-0.01284	-0.00604	-0.00378	-0.00755	-0.00227	-0.00189	-0.00189	-0.00453		81.9	-8.40728	-42.0364	-21.7966	-66.0127	-48.5754	-47.6412	-54.4916
82	0.381572	0.309179		82	-514.089	-444.963		82	-0.01133	-0.00869	-0.00264	-0.00453	-0.000755	-0.00264	-0.00453	-0.00227		82	-6.22761	-42.0364	-26.4674	-65.0786	-48.5754	-51.3778	-53.5575
82.1	0.385458	0.301354		82.1	-509.419	-447.143		82.1	-0.00906	-0.00831	-0.00264	-0.00566	-0.0034	-0.00529	-0.00264	-0.00529		82.1	-9.34142	-46.3957	-26.4674	-66.0127	-54.803	-44.5274	-57.9168
82.2	0.35437	0.309179		82.2	-509.73	-445.897		82.2	-0.00982	-0.00793	-0.00491	-0.00831	-0.00453	-0.00378	-0.00264	-0.00529		82.2	-10.5869	-49.5095	-30.5153	-66.6355	-54.4916	-48.264	-50.4437
82.3	0.381572	0.31896		82.3	-513.467	-444.34		82.3	-0.00944	-0.00793	-0.00227	-0.01095	-0.00189	-0.00453	-0.00453	-0.00642		82.3	-7.47313	-47.0185	-27.7129	-67.881	-51.0664	-50.4437	-53.2461
82.4	0.35437	0.305266		82.4	-507.862	-448.699		82.4	-0.01095	-0.00718	-0.000378	-0.00793	-0.00189	-0.00566	-0.00302	-0.00529		82.4	-8.71866	-41.1022	-26.156	-63.2103	-47.0185	-46.0843	-54.803
82.5	0.350484	0.322873		82.5	-515.335	-457.418		82.5	-0.00982	-0.00566	-0.00113	-0.00755	-0.00415	-0.00642	-0.00302	-0.00415		82.5	-8.0959	-37.3657	-28.647	-65.0786	-49.1981	-48.264	-54.1802
82.6	0.350484	0.322873		82.6	-514.712	-464.58		82.6	-0.0102	-0.00831	-0.00642	-0.00642	-0.00227	-0.00227	-0.00189	-0.00604		82.6	-5.60485	-33.6291	-21.7966	-65.0786	-52.0006	-52.6233	-55.1144
82.7	0.393229	0.342435		82.7	-509.73	-461.466		82.7	-0.00869	-0.00566	-0.00491	-0.0068	-0.0034	-0.00302	-0.000378	-0.00453		82.7	-8.0959	-35.186	-21.7966	-61.0306	-51.3778	-51.0664	-50.1323
82.8	0.369914	0.330698		82.8	-503.814	-458.975		82.8	-0.01171	-0.01473	-0.00529	-0.00793	-0.00189	-0.00604	-0.00529	-0.000755		82.8	-9.03004	-34.8746	-28.647	-61.0306	-52.9347	-45.1502	-47.6412
82.9	0.389343	0.330698		82.9	-498.832	-454.927		82.9	-0.01057	-0.00793	-0.0068	-0.00491	-0.00453	-0.00566	-0.00189	-0.00415		82.9	-5.60485	-41.4136	-32.695	-61.0306	-52.0006	-44.5274	-49.8209
83	0.393229	0.324829		83	-501.634	-467.382		83	-0.00944	-0.00604	-0.00453	-0.00604	-0.00604	-0.00415	-0.00302	-0.00227		83	-7.78452	-34.5632	-30.2039	-66.3241	-56.0485	-44.8388	-52.0006
83.1	0.404887	0.313091		83.1	-493.85	-479.838		83.1	-0.0068	-0.00906	-0.0034	-0.00793	-0.0034	-0.00378	-0.00529	-0.00566		83.1	-7.47313	-24.2877	-29.2698	-63.833	-53.2461	-42.0364	-50.4437
83.2	0.393229	0.307222		83.2	-488.868	-490.736		83.2	-0.01057	-0.00755	0.00113	-0.00869	-0.000378	-0.0034	-0.00227	-0.00415		83.2	-7.47313	-23.6649	-28.9584	-68.5037	-58.5396	-42.6591	-51.6892
83.3	0.439861	0.285703		83.3	-495.095	-487.311		83.3	-0.00944	-0.00755	-0.0034	-0.00982	-0.0068	-0.00642	-0.00227	-0.00491		83.3	-8.71866	-27.0901	-24.2877	-62.8989	-56.3599	-40.1681	-54.803
83.4	0.424317	0.283747		83.4	-502.568	-487.933		83.4	-0.01057	-0.01133	-0.00453	-0.00604	-0.00415	-0.00566	-0.00415	-0.00151		83.4	-6.85037	-24.5991	-26.156	-61.0306	-57.9168	-44.216	-52.0006
83.5	0.432089	0.295485		83.5	-506.305	-483.263		83.5	-0.01095	-0.00869	-0.00189	-0.0068	-0.00151	-0.0034	-0.00453	-0.0034		83.5	-6.22761	-24.5991	-34.5632	-70.6834	-59.1623	-42.0364	-54.803
83.6	0.381572	0.291572		83.6	-502.88	-487.311		83.6	-0.00982	-0.00869	0	-0.0068	-0.00302	-0.00378	-0.00227	-0.00566		83.6	-6.53899	-25.5332	-31.4494	-76.911	-55.1144	-38.6112	-56.0485
83.7	0.416545	0.289616		83.7	-501.323	-491.047		83.7	-0.00944	-0.0068	-0.0034	-0.00982	-0.00415	-0.00566	-0.00378	-0.00415		83.7	-7.78452	-28.0243	-30.8267	-75.9769	-55.7371	-40.7909	-51.6892
83.8	0.3738	0.299397		83.8	-501.323	-483.885		83.8	-0.00831	-0.00793	-0.00378	-0.00944	-0.00491	-0.0034	-0.00453	-0.0034		83.8	-7.16175	-28.647	-29.5812	-68.8151	-59.1623	-44.8388	-48.8868
83.9	0.424317	0.30331		83.9	-503.502	-493.227		83.9	-0.00869	-0.00982	-0.00189	-0.00793	-0.00642	-0.00378	-0.00227	-0.00415		83.9	-7.78452	-31.1381	-28.9584	-69.7493	-59.7851	-43.5933	-49.5095
84	0.397115	0.305266		84	-501.323	-497.275		84	-0.00982	-0.00415	-0.00642	-0.0102	-0.00227	-0.00604	-0.00453	-0.00491		84	-8.40728	-30.5153	-30.5153	-70.6834	-56.9827	-43.9047	-46.7071
84.1	0.439861	0.30331		84.1	-495.095	-491.359		84.1	-0.00642	-0.00869	-0.00151	-0.00831	-0.00491	-0.0034	-0.0034	-0.00642		84.1	-7.16175	-30.2039	-29.2698	-68.1924	-57.9168	-43.9047	-49.8209
84.2	0.401001	0.322873		84.2	-498.52	-491.67		84.2	-0.00869	-0.00831	0.000378	-0.00529	-0.00491	-0.00453	-0.00604	-0.000755		84.2	-7.16175	-27.7129	-31.4494	-65.3899	-55.4258	-42.3478	-46.0843
84.3	0.385458	0.326785		84.3	-508.173	-493.538		84.3	-0.00755	-0.00944	-0.00264	-0.00642	-0.00453	-0.00227	-0.00415	-0.00491		84.3	-6.53899	-32.3836	-33.9405	-69.1265	-58.8509	-41.1022	-47.0185
84.4	0.404887	0.301354		84.4	-513.778	-490.736		84.4	-0.00944	-0.00869	-0.0034	-0.01095	-0.00415	-0.00529	-0.00264	-0.00378		84.4	-7.47313	-30.5153	-33.0063	-66.0127	-59.1623	-39.5453	-38.9226
84.5	0.389343	0.301354		84.5	-506.928	-486.999		84.5	-0.00944	-0.00982	-0.00529	-0.00755	-0.00264	-0.00453	-0.00529	-0.000755		84.5	-6.53899	-27.0901	-33.0063	-69.1265	-56.6713	-36.4315	-36.1202
84.6	0.447633	0.30331		84.6	-503.502	-468.939		84.6	-0.0068	-0.00793	-0.00642	-0.00755	-0.00453	-0.00227	-0.00491	-0.00453		84.6	-4.67071	-30.5153	-31.1381	-69.7493	-57.9168	-40.4795	-35.186
84.7	0.393229	0.301354		84.7	-501.634	-458.664		84.7	-0.0102	-0.00491	-0.00491	-0.00944	-0.00189	0	-0.0034	-0.00415		84.7	-7.78452	-31.7608	-32.3836	-70.0606	-57.6054	-37.0543	-42.0364
84.8	0.377686	0.291572		84.8	-506.616	-463.334		84.8	-0.01246	-0.00642	-0.00529	-0.00869	-0.00302	-0.00453	-0.00378	-0.00415		84.8	-8.0959	-27.4015	-35.4974	-64.4558	-62.8989	-35.8088	-37.6771
84.9	0.385458	0.272009		84.9	-509.107	-482.017		84.9	-0.00906	-0.00793	-0.00302	-0.00831	-0.00453	-0.00566	-0.00227	-0.00415		84.9	-7.47313	-25.2218	-38.2998	-63.833	-58.8509	-33.9405	-40.1681
85	0.393229	0.277878		85	-507.239	-483.885		85	-0.00982	-0.00604	-0.00378	-0.00718	-0.00529	-0.00642	-0.00491	-0.00189		85	-5.29347	-25.2218	-35.186	-68.5037	-59.7851	-34.5632	-38.9226
85.1	0.428203	0.268097		85.1	-510.041	-480.46		85.1	-0.00642	-0.00453	-0.0034	-0.00831	-0.00604	-0.00378	-0.00264	-0.0034		85.1	-7.47313	-24.9104	-37.0543	-66.6355	-57.6054	-33.6291	-38.2998
85.2	0.455404	0.275922		85.2	-507.862	-477.969		85.2	-0.00869	-0.01057	-0.00529	-0.0102	-0.00529	-0.000755	-0.00415	-0.00453		85.2	-6.85037	-24.5991	-34.8746	-58.5396	-58.5396	-37.6771	-35.186
85.3	0.416545	0.281791		85.3	-503.502	-484.508		85.3	-0.00906	-0.00566	-0.00151	-0.00944	-0.0034	-0.00189	-0.00491	-0.00378		85.3	-8.40728	-27.4015	-35.186	-65.7013	-54.1802	-41.4136	-40.1681
85.4	0.447633	0.305266		85.4	-498.832	-491.981		85.4	-0.00755	-0.00793	-0.00189	-0.01095	-0.0034	-0.00415	-0.00227	-0.000755		85.4	-8.0959	-29.8925	-33.9405	-65.3899	-52.3119	-42.6591	-38.9226
85.5	0.397115	0.297441		85.5	-498.209	-495.095		85.5	-0.00831	-0.00755	-0.00302	-0.00906	-0.00302	-0.00415	-0.00264	-0.00529		85.5	-8.71866	-30.2039	-32.3836	-62.2761	-48.8868	-41.4136	-41.1022
85.6	0.432089	0.283747		85.6	-493.85	-505.059		85.6	-0.00944	-0.01171	-0.000378	-0.00906	-0.00453	-0.00302	-0.00453	-0.00491		85.6	-7.47313	-30.5153	-35.186	-57.9168	-46.7071	-46.0843	-50.4437
85.7	0.412659	0.272009		85.7	-493.538	-500.077		85.7	-0.00793	-0.00793	-0.00529	-0.00604	-0.00642	-0.00227	-0.00529	-0.00189		85.7	-6.53899	-26.7787	-34.8746	-62.2761	-47.9526	-40.7909	-47.6412
85.8	0.424317	0.270053		85.8	-497.898	-487.622		85.8	-0.00718	-0.0034	-0.00642	-0.0068	-0.00793	-0.00227	-0.0034	-0.00264		85.8	-9.03004	-25.5332	-36.1202	-61.6534	-44.5274	-42.6591	-47.6412
85.9	0.447633	0.270053		85.9	-497.586	-479.215		85.9	-0.00642	-0.00529	-0.00227	-0.00944	-0.00378	-0.00491	-0.0034	-0.00566		85.9	-5.60485	-27.4015	-39.5453	-61.9647	-41.725	-41.725	-48.8868
86	0.393229	0.272009		86	-493.538	-470.807		86	-0.00982	-0.00944	-0.00264	-0.00453	-0.00453	-0.00491	-0.00415	-0.00453		86	-8.71866	-28.9584	-41.1022	-58.8509	-39.5453	-43.9047	-45.1502
86.1	0.439861	0.266141		86.1	-495.095	-470.496		86.1	-0.00869	-0.00793	0.00113	-0.00831	-0.00604	-0.00415	-0.00566	-0.000378		86.1	-8.71866	-28.0243	-42.0364	-63.5216	-50.1323	-41.4136	-47.0185
86.2	0.470948	0.297441		86.2	-495.718	-456.484		86.2	-0.00831	-0.00793	-0.00642	-0.0102	-0.00642	-0.00566	-0.00529	-0.00302		86.2	-7.78452	-28.647	-38.9226	-66.3241	-53.8688	-40.4795	-48.5754
86.3	0.428203	0.291572		86.3	-491.047	-462.089		86.3	-0.00869	-0.0068	-0.00491	-0.01057	-0.00378	-0.00302	-0.00755	-0.00415		86.3	-7.47313	-26.7787	-37.0543	-66.3241	-57.294	-44.216	-45.1502
86.4	0.439861	0.277878		86.4	-488.556	-480.772		86.4	-0.00718	-0.00869	-0.00566	-0.00793	-0.00378	-0.00453	-0.0034	-0.00227		86.4	-8.0959	-32.695	-44.216	-63.2103	-57.9168	-41.725	-45.1502
86.5	0.474834	0.281791		86.5	-485.131	-489.179		86.5	-0.0068	-0.00718	-0.00529	-0.00944	-0.00415	-0.00604	-0.00491	-0.00302		86.5	-8.0959	-33.6291	-43.2819	-64.7672	-57.9168	-39.8567	-42.0364
86.6	0.428203	0.264184		86.6	-482.329	-490.424		86.6	-0.00793	-0.00906	-0.000755	-0.01171	-0.00415	0	-0.00604	-0.00189		86.6	-4.98209	-28.9584	-41.725	-65.0786	-57.294	-41.725	-46.7071
86.7	0.463176	0.264184		86.7	-488.868	-490.424		86.7	-0.0102	-0.0068	-0.00453	-0.00755	-0.00491	-0.00642	-0.00566	-0.00264		86.7	-7.47313	-26.7787	-43.5933	-64.4558	-59.7851	-42.0364	-47.6412
86.8	0.435975	0.266141		86.8	-499.143	-480.46		86.8	-0.00869	-0.00529	-0.0034	-0.00831	-0.00453	-0.00378	-0.00604	-0.00415		86.8	-10.2756	-28.9584	-49.1981	-64.4558	-56.3599	-43.9047	-47.6412
86.9	0.443747	0.270053		86.9	-506.928	-477.346		86.9	-0.00718	-0.00529	-0.00264	-0.00982	-0.00718	-0.00151	-0.00264	-0.0034		86.9	-11.5211	-31.1381	-42.9705	-67.2582	-51.3778	-47.6412	-47.3299
87	0.424317	0.266141		87	-506.616	-480.46		87	-0.00906	-0.00755	-0.00189	-0.00869	-0.00491	-0.00453	-0.0034	-0.00642		87	-9.03004	-32.695	-43.2819	-64.1444	-53.5575	-44.8388	-43.2819
87.1	0.412659	0.262228		87.1	-500.077	-473.921		87.1	-0.00755	-0.01057	-0.00378	-0.01095	-0.00491	-0.00642	-0.00566	-0.00566		87.1	-10.5869	-32.3836	-35.4974	-65.3899	-51.6892	-43.5933	-43.9047
87.2	0.3738	0.272009		87.2	-505.371	-470.807		87.2	-0.00415	-0.00491	-0.00302	-0.00793	-0.00264	-0.00151	-0.0034	-0.000755		87.2	-7.78452	-26.156	-34.2519	-66.0127	-51.6892	-43.9047	-42.6591
87.3	0.385458	0.273966		87.3	-503.502	-468.628		87.3	-0.00944	-0.00302	-0.00378	-0.00906	-0.00529	-0.00264	-0.00529	-0.00227		87.3	-9.96418	-29.2698	-32.3836	-61.9647	-52.0006	-40.1681	-47.0185
87.4	0.397115	0.25049		87.4	-501.634	-459.598		87.4	-0.00869	-0.00642	-0.00793	-0.01171	-0.00755	-0.0034	-0.00529	-0.000378		87.4	-10.2756	-29.2698	-38.9226	-61.6534	-49.5095	-42.0364	-51.3778
87.5	0.366028	0.254403		87.5	-501.634	-468.628		87.5	-0.00906	-0.00529	-0.00529	-0.00642	-0.0068	-0.00151	-0.00491	-0.00189		87.5	-9.34142	-31.1381	-33.9405	-62.8989	-53.5575	-40.4795	-49.8209
87.6	0.3738	0.248534		87.6	-502.568	-468.939		87.6	-0.00831	-0.00642	-0.00529	-0.00491	-0.00491	-0.00264	-0.00529	-0.00415		87.6	-10.2756	-29.5812	-34.5632	-68.8151	-50.1323	-39.8567	-40.4795
87.7	0.412659	0.258316		87.7	-509.73	-470.185		87.7	-0.00604	-0.00642	-0.0034	-0.00944	-0.00491	-0.0034	-0.00604	-0.00113		87.7	-9.6528	-28.647	-31.4494	-68.1924	-55.1144	-41.1022	-42.9705
87.8	0.424317	0.238753		87.8	-512.844	-470.185		87.8	-0.00831	-0.00491	-0.00378	-0.01057	-0.00491	-0.0034	-0.00302	-0.00302		87.8	-8.71866	-29.2698	-32.695	-66.9468	-54.803	-41.725	-44.5274
87.9	0.455404	0.242665		87.9	-506.616	-468.628		87.9	-0.00793	-0.00831	-0.00151	-0.00944	-0.00529	-0.00566	-0.00378	-0.00378		87.9	-9.96418	-26.7787	-35.4974	-71.9289	-54.4916	-41.725	-45.1502
88	0.389343	0.266141		88	-496.341	-466.76		88	-0.00718	-0.00944	-0.00378	-0.01057	-0.00831	-0.00415	-0.00529	-0.00302		88	-7.47313	-26.156	-34.8746	-65.0786	-57.6054	-38.9226	-41.725
88.1	0.362142	0.270053		88.1	-492.293	-466.448		88.1	-0.01057	-0.0068	-0.00415	-0.00793	-0.00529	-0.000378	-0.00302	-0.00302		88.1	-8.71866	-29.5812	-33.9405	-67.5696	-56.9827	-37.3657	-43.9047
88.2	0.389343	0.246578		88.2	-494.161	-476.412		88.2	-0.00718	-0.00755	-0.00378	-0.01057	-0.0068	-0.00302	-0.00302	0.000755		88.2	-9.03004	-28.3356	-37.3657	-71.9289	-54.1802	-37.6771	-42.6591
88.3	0.381572	0.236796		88.3	-496.652	-473.921		88.3	-0.0068	-0.00604	-0.00604	-0.00906	-0.00793	-0.00529	-0.00453	-0.00415		88.3	-9.6528	-33.6291	-41.4136	-66.9468	-51.6892	-36.7429	-42.0364
88.4	0.393229	0.246578		88.4	-496.029	-468.939		88.4	-0.00793	-0.00378	-0.00793	-0.00982	-0.0068	-0.00378	-0.00604	-0.00491		88.4	-10.5869	-30.2039	-43.5933	-70.0606	-53.2461	-44.5274	-45.1502
88.5	0.412659	0.268097		88.5	-496.341	-463.023		88.5	-0.00718	-0.00642	-0.00529	-0.0068	-0.00453	-0.00415	-0.00302	-0.000755		88.5	-8.0959	-32.695	-45.1502	-72.5517	-54.4916	-46.0843	-44.5274
88.6	0.447633	0.258316		88.6	-501.011	-463.646		88.6	-0.00604	-0.00755	-0.00566	-0.00453	-0.00566	-0.00378	-0.00491	-0.00113		88.6	-6.53899	-32.3836	-42.9705	-76.2883	-56.9827	-43.9047	-42.6591
88.7	0.412659	0.266141		88.7	-500.077	-461.155		88.7	-0.00982	-0.00831	-0.00604	-0.01171	-0.0068	-0.00264	-0.00415	-0.00378		88.7	-9.03004	-32.695	-38.6112	-76.911	-53.2461	-44.216	-41.725
88.8	0.416545	0.266141		88.8	-485.754	-451.502		88.8	-0.00718	-0.00529	-0.00415	-0.00906	-0.00453	-0.00491	-0.00566	-0.00566		88.8	-12.7666	-35.186	-39.8567	-73.4858	-58.8509	-44.8388	-41.4136
88.9	0.369914	0.264184		88.9	-483.263	-452.747		88.9	-0.0034	-0.00529	-0.0034	-0.01095	-0.00566	0	-0.0068	-0.00264		88.9	-6.53899	-37.6771	-32.0722	-69.4379	-52.3119	-46.0843	-43.9047
89	0.362142	0.279835		89	-486.065	-452.125		89	-0.01057	-0.00642	-0.0068	-0.00831	-0.00415	-0.000755	-0.00604	-0.00151		89	-7.47313	-37.3657	-34.8746	-72.2403	-54.1802	-47.3299	-37.9884
89.1	0.3738	0.291572		89.1	-486.065	-446.208		89.1	-0.00869	-0.00529	-0.00755	-0.00831	-0.00718	-0.00302	-0.00566	-0.00227		89.1	-8.0959	-33.6291	-40.1681	-74.42	-53.8688	-42.6591	-41.1022
89.2	0.381572	0.297441		89.2	-495.095	-453.682		89.2	-0.00604	-0.00491	-0.00604	-0.00529	-0.0068	-0.00566	-0.00604	-0.00227		89.2	-6.53899	-37.0543	-32.0722	-70.9948	-57.294	-47.6412	-46.3957
89.3	0.331054	0.283747		89.3	-502.568	-463.023		89.3	-0.00755	-0.00378	-0.00189	-0.0068	-0.00793	-0.00415	-0.00491	-0.00189		89.3	-6.53899	-31.4494	-22.7308	-78.7793	-58.5396	-48.8868	-43.5933
89.4	0.381572	0.299397		89.4	-503.814	-467.382		89.4	-0.00869	-0.00566	-0.0068	-0.00944	-0.00718	-0.00264	-0.00718	-0.00227		89.4	-7.16175	-33.3177	-30.5153	-82.2045	-54.1802	-51.6892	-42.0364
89.5	0.401001	0.307222		89.5	-501.323	-465.514		89.5	-0.00604	-0.00604	-0.00566	-0.00944	-0.00793	-0.0068	-0.00529	-0.00189		89.5	-7.47313	-34.2519	-33.6291	-80.6476	-56.0485	-50.4437	-44.5274
89.6	0.377686	0.30331		89.6	-497.586	-460.843		89.6	-0.00604	-0.00302	-0.00302	-0.0102	-0.00642	-0.0034	-0.0068	-0.0034		89.6	-6.85037	-28.9584	-30.2039	-77.5338	-57.9168	-51.6892	-41.725
89.7	0.362142	0.293528		89.7	-499.455	-446.52		89.7	-0.00906	-0.0068	-0.00491	-0.00831	-0.0034	-0.00415	-0.00529	-0.000378		89.7	-9.03004	-32.695	-28.647	-80.0248	-55.4258	-53.2461	-38.6112
89.8	0.377686	0.293528		89.8	-499.766	-445.586		89.8	-0.00793	-0.00378	-0.00529	-0.00831	-0.00453	-0.0034	-0.00491	-0.00529		89.8	-9.34142	-25.5332	-29.5812	-87.498	-63.833	-49.8209	-41.725
89.9	0.35437	0.315048		89.9	-500.389	-453.059		89.9	-0.00755	-0.00529	-0.00793	-0.00906	-0.00415	-0.00529	-0.00227	-0.00642		89.9	-7.47313	-25.8446	-28.0243	-89.6776	-60.0965	-47.6412	-41.1022
90	0.369914	0.30331		90	-492.604	-453.682		90	-0.00491	-0.0068	-0.00453	-0.00755	-0.00491	-0.00378	-0.00604	-0.0034		90	-5.29347	-25.5332	-24.5991	-82.2045	-61.0306	-54.1802	-42.6591
90.1	0.350484	0.311135		90.1	-498.832	-437.801		90.1	-0.00906	-0.00415	-0.00453	-0.0068	-0.00793	-0.000378	-0.00604	-0.00113		90.1	-7.47313	-32.3836	-23.3535	-83.1386	-61.9647	-47.9526	-40.1681
90.2	0.315511	0.31896		90.2	-503.191	-438.424		90.2	-0.00944	-0.00491	-0.00642	-0.00793	-0.00718	-0.00378	-0.00604	-0.00151		90.2	-9.6528	-30.5153	-23.3535	-89.0549	-58.8509	-51.3778	-39.234
90.3	0.331054	0.289616		90.3	-500.077	-438.424		90.3	-0.00642	-0.00415	-0.00529	-0.00869	-0.00982	-0.00529	-0.00302	-0.00264		90.3	-7.16175	-24.5991	-17.4373	-86.2524	-60.0965	-44.5274	-43.2819
90.4	0.385458	0.305266		90.4	-495.718	-446.208		90.4	-0.00529	-0.00755	-0.00491	-0.00906	-0.00869	-0.00604	-0.00566	-0.00378		90.4	-6.53899	-30.5153	-17.4373	-80.0248	-63.2103	-44.5274	-39.8567
90.5	0.288309	0.299397		90.5	-500.077	-445.897		90.5	-0.0068	-0.00718	-0.00566	-0.00831	-0.00869	-0.00151	-0.00378	-0.00264		90.5	-10.2756	-31.1381	-20.2397	-81.5817	-64.4558	-44.8388	-41.1022
90.6	0.33494	0.311135		90.6	-502.568	-448.699		90.6	-0.00869	-0.00604	-0.00566	-0.0068	-0.00642	-0.00415	-0.00604	-0.00227		90.6	-9.34142	-33.0063	-16.8146	-77.5338	-53.2461	-46.3957	-33.6291
90.7	0.319397	0.299397		90.7	-499.455	-459.598		90.7	-0.00755	-0.0034	-0.00566	-0.00944	-0.00718	-0.00264	-0.00755	-0.00415		90.7	-7.47313	-36.1202	-18.9942	-77.2224	-58.2282	-47.0185	-36.7429
90.8	0.366028	0.301354		90.8	-500.7	-457.418		90.8	-0.00491	-0.00604	-0.00453	-0.00755	-0.0068	-0.00302	-0.00415	-0.00302		90.8	-9.03004	-35.186	-14.9463	-80.6476	-61.9647	-47.6412	-41.4136
90.9	0.33494	0.305266		90.9	-503.191	-462.4		90.9	-0.00831	-0.00566	-0.00566	-0.00718	-0.00793	-0.0034	-0.0034	-0.00227		90.9	-8.71866	-29.5812	-14.3235	-80.0248	-58.5396	-43.2819	-41.1022
91	0.350484	0.309179		91	-489.49	-467.071		91	-0.00755	-0.00302	-0.00491	-0.00831	-0.00793	-0.00491	-0.00529	-0.00529		91	-8.40728	-33.9405	-19.617	-79.0907	-61.342	-43.9047	-37.3657
91.1	0.288309	0.291572		91.1	-487.622	-453.059		91.1	-0.00831	-0.00227	-0.00642	-0.00491	-0.00755	-0.00453	-0.00642	-0.000755		91.1	-7.47313	-37.0543	-16.5032	-71.9289	-60.4078	-47.9526	-36.7429
91.2	0.33494	0.270053		91.2	-493.538	-455.55		91.2	-0.00831	-0.00566	-0.00453	-0.0102	-0.00793	-0.00453	-0.00642	0		91.2	-8.71866	-36.4315	-12.4552	-67.2582	-60.0965	-45.773	-34.8746
91.3	0.342712	0.25049		91.3	-491.981	-457.107		91.3	-0.00793	-0.00642	-0.00831	-0.00415	-0.00869	-0.00566	-0.00415	-0.00227		91.3	-9.6528	-37.3657	-17.7487	-74.1086	-60.4078	-37.0543	-34.5632
91.4	0.342712	0.270053		91.4	-490.113	-446.52		91.4	-0.00944	-0.00378	-0.00566	-0.00642	-0.00415	-0.00453	-0.00378	-0.00755		91.4	-4.98209	-37.9884	-14.9463	-73.7972	-55.1144	-39.8567	-33.9405
91.5	0.288309	0.266141		91.5	-490.424	-443.095		91.5	-0.00906	-0.00831	-0.00566	-0.00718	-0.00604	-0.00302	-0.00453	-0.00227		91.5	-6.85037	-35.186	-14.3235	-76.5996	-55.7371	-41.1022	-33.3177
91.6	0.342712	0.279835		91.6	-488.245	-444.652		91.6	-0.00831	-0.00529	-0.00453	-0.00755	-0.00529	-0.00491	-0.00642	-0.00302		91.6	-6.53899	-33.6291	-16.1918	-73.7972	-56.9827	-41.1022	-35.4974
91.7	0.366028	0.291572		91.7	-487.622	-447.454		91.7	-0.01057	-0.00113	-0.00529	-0.00566	-0.00793	-0.0034	-0.00529	-0.00491		91.7	-5.60485	-37.6771	-19.9284	-66.6355	-58.2282	-42.6591	-31.1381
91.8	0.408773	0.273966		91.8	-493.227	-445.897		91.8	-0.00718	-0.00491	-0.0102	-0.00718	-0.00718	-0.00491	-0.0034	-0.00453		91.8	-5.29347	-37.9884	-23.9763	-72.2403	-62.2761	-43.9047	-34.8746
91.9	0.451519	0.277878		91.9	-498.52	-443.717		91.9	-0.0068	-0.00642	-0.0068	-0.00566	-0.00566	-0.00453	-0.0034	-0.00151		91.9	-5.60485	-33.9405	-19.9284	-73.4858	-54.4916	-42.9705	-33.6291
92	0.362142	0.270053		92	-495.095	-443.095		92	-0.00566	-0.00566	-0.00415	-0.00642	-0.00755	-0.00302	-0.00755	-0.00151		92	-9.34142	-35.186	-19.3056	-74.1086	-57.6054	-39.234	-38.6112
92.1	0.307739	0.270053		92.1	-493.85	-439.669		92.1	-0.00906	-0.00566	-0.00831	-0.0068	-0.00755	-0.0068	-0.00415	-0.00604		92.1	-7.16175	-37.6771	-19.617	-72.2403	-61.9647	-46.3957	-37.9884
92.2	0.338826	0.240709		92.2	-493.227	-450.568		92.2	-0.00831	-0.00113	-0.00604	-0.00604	-0.00604	-0.00491	-0.00491	-0.00189		92.2	-4.35933	-34.5632	-17.7487	-77.5338	-61.6534	-41.1022	-34.8746
92.3	0.342712	0.252447		92.3	-487.311	-457.73		92.3	-0.01095	-0.00604	-0.00793	-0.00793	-0.00491	-0.00415	-0.00566	-0.00189		92.3	-6.85037	-33.6291	-14.6349	-77.5338	-61.0306	-45.1502	-33.9405
92.4	0.338826	0.244622		92.4	-490.113	-450.879		92.4	-0.00642	-0.00604	-0.00793	-0.00642	-0.00642	-0.00604	-0.00491	-0.00227		92.4	-8.0959	-30.8267	-18.0601	-82.5159	-57.294	-45.4616	-29.2698
92.5	0.311625	0.248534		92.5	-497.586	-442.472		92.5	-0.01208	-0.00566	-0.00453	-0.00869	-0.0068	-0.0034	-0.00529	-0.000755		92.5	-8.71866	-27.7129	-16.1918	-80.959	-55.7371	-46.0843	-31.4494
92.6	0.350484	0.25049		92.6	-493.85	-439.047		92.6	-0.00831	-0.00529	-0.00415	-0.00642	-0.0068	-0.00491	-0.00529	-0.00491		92.6	-6.53899	-31.4494	-21.7966	-73.4858	-56.0485	-42.3478	-39.5453
92.7	0.323282	0.230928		92.7	-492.604	-425.657		92.7	-0.00982	-0.00415	-0.00453	-0.00642	-0.00755	-0.0034	-0.00529	-0.00491		92.7	-7.16175	-29.8925	-24.5991	-74.1086	-59.1623	-43.2819	-33.6291
92.8	0.338826	0.228971		92.8	-501.946	-423.478		92.8	-0.00944	-0.00415	-0.00604	-0.00793	-0.00793	-0.00566	-0.00491	-0.00491		92.8	-7.16175	-28.647	-22.108	-73.1744	-57.294	-42.9705	-33.6291
92.9	0.35437	0.217234		92.9	-497.586	-421.921		92.9	-0.00906	-0.00264	-0.00491	-0.00869	-0.00642	-0.00604	-0.00415	-0.00113		92.9	-6.53899	-27.7129	-22.7308	-75.0427	-57.294	-42.0364	-38.6112
93	0.292195	0.213321		93	-498.209	-413.202		93	-0.00793	-0.00415	-0.0034	-0.00302	-0.00831	-0.00415	-0.00415	-0.00453		93	-5.29347	-22.108	-27.7129	-75.3541	-61.9647	-44.5274	-35.186
93.1	0.311625	0.246578		93.1	-495.407	-415.693		93.1	-0.00453	-0.00566	-0.00944	-0.0068	-0.00378	-0.00415	-0.00642	-0.00642		93.1	-5.29347	-22.108	-26.7787	-75.9769	-59.4737	-45.1502	-33.0063
93.2	0.342712	0.260272		93.2	-496.963	-411.645		93.2	-0.00944	-0.00415	-0.00718	-0.0068	-0.00529	-0.00604	-0.00264	-0.00453		93.2	-4.35933	-27.0901	-26.4674	-67.881	-56.6713	-47.3299	-32.0722
93.3	0.331054	0.291572		93.3	-498.209	-420.052		93.3	-0.01095	-0.00718	-0.00604	-0.00718	-0.00831	-0.00302	-0.00227	-0.00566		93.3	-5.60485	-28.9584	-28.0243	-67.881	-57.294	-48.8868	-31.7608
93.4	0.377686	0.258316		93.4	-496.341	-424.723		93.4	-0.00869	-0.0068	-0.00718	-0.00793	-0.00604	-0.00491	-0.00529	-0.00604		93.4	-7.78452	-24.5991	-28.9584	-66.9468	-49.8209	-46.3957	-32.3836
93.5	0.366028	0.279835		93.5	-505.059	-430.639		93.5	-0.01095	-0.00264	-0.00906	-0.00566	-0.00378	-0.0034	-0.00529	-0.00491		93.5	-8.0959	-25.5332	-31.1381	-73.4858	-50.755	-44.216	-34.8746
93.6	0.33494	0.268097		93.6	-515.024	-429.082		93.6	-0.00906	-0.00642	-0.00264	-0.00453	-0.00642	-0.00831	-0.00189	-0.00302		93.6	-8.71866	-22.108	-30.5153	-65.3899	-52.6233	-43.2819	-35.8088
93.7	0.362142	0.273966		93.7	-514.401	-423.166		93.7	-0.00982	-0.00415	-0.00529	-0.00906	-0.00793	-0.00604	-0.00566	-0.00491		93.7	-6.22761	-24.9104	-29.5812	-74.1086	-49.1981	-42.3478	-34.2519
93.8	0.3738	0.264184		93.8	-512.844	-422.544		93.8	-0.00906	-0.00378	-0.00831	-0.00642	-0.00302	-0.00302	-0.00491	-0.00227		93.8	-8.40728	-23.9763	-30.2039	-68.8151	-51.0664	-43.2819	-31.4494
93.9	0.323282	0.246578		93.9	-511.91	-422.855		93.9	-0.00755	-0.00529	-0.00869	-0.00869	-0.00642	-0.00642	-0.00529	-0.00415		93.9	-6.85037	-23.9763	-29.5812	-68.5037	-50.4437	-42.0364	-27.0901
94	0.350484	0.25049		94	-505.994	-430.328		94	-0.00604	-0.00415	-0.00415	-0.00529	-0.00566	-0.00566	-0.00529	-0.00718		94	-4.98209	-19.617	-29.2698	-72.2403	-43.9047	-42.3478	-30.2039
94.1	0.331054	0.256359		94.1	-501.323	-437.178		94.1	-0.01095	-0.00604	-0.00906	-0.00604	-0.00755	-0.00529	-0.00453	-0.00491		94.1	-7.16175	-17.1259	-27.0901	-73.7972	-49.1981	-43.2819	-36.7429
94.2	0.393229	0.272009		94.2	-493.227	-440.604		94.2	-0.0068	-0.00491	-0.00869	-0.0068	-0.00831	-0.00453	-0.00415	-0.00378		94.2	-7.47313	-18.9942	-24.5991	-70.372	-45.4616	-45.1502	-36.1202
94.3	0.331054	0.320916		94.3	-497.275	-433.442		94.3	-0.01133	-0.00378	-0.00718	-0.00566	-0.00642	-0.00642	-0.00453	-0.00415		94.3	-4.67071	-22.4194	-27.0901	-69.4379	-41.725	-44.8388	-34.5632
94.4	0.338826	0.311135		94.4	-501.323	-425.969		94.4	-0.00906	-0.0068	-0.00718	-0.00415	-0.00415	-0.0068	-0.00453	-0.00491		94.4	-4.98209	-18.0601	-24.9104	-70.372	-44.8388	-45.1502	-26.4674
94.5	0.315511	0.297441		94.5	-500.077	-420.675		94.5	-0.01095	-0.00378	-0.00189	-0.0068	-0.00491	-0.00642	-0.00453	-0.00604		94.5	-9.34142	-14.9463	-24.5991	-70.6834	-42.3478	-47.9526	-33.3177
94.6	0.377686	0.281791		94.6	-493.538	-420.052		94.6	-0.00604	-0.00529	-0.00491	-0.00793	-0.0068	-0.00302	-0.0034	-0.00302		94.6	-9.34142	-20.5511	-23.3535	-71.9289	-39.5453	-50.1323	-28.9584
94.7	0.346598	0.275922		94.7	-493.538	-414.448		94.7	-0.00869	-0.00264	-0.00529	-0.00755	-0.00793	-0.00604	-0.00415	-0.00227		94.7	-10.8983	-22.108	-27.0901	-70.9948	-39.8567	-47.9526	-31.1381
94.8	0.346598	0.291572		94.8	-495.407	-400.747		94.8	-0.01057	-0.00604	-0.00755	-0.00793	-0.00453	-0.00566	-0.00453	-0.00604		94.8	-7.47313	-19.617	-24.2877	-68.5037	-38.9226	-50.4437	-28.3356
94.9	0.346598	0.279835		94.9	-498.209	-388.603		94.9	-0.0136	-0.00415	-0.00566	-0.00491	-0.00491	-0.00755	-0.00378	-0.00755		94.9	-7.16175	-16.8146	-27.0901	-67.2582	-46.7071	-44.8388	-29.2698
95	0.366028	0.281791		95	-491.047	-387.046		95	-0.01133	-0.00642	-0.00793	-0.00718	-0.00529	-0.00302	-0.00415	-0.00453		95	-6.85037	-19.9284	-20.2397	-63.833	-50.1323	-44.5274	-30.5153
95.1	0.350484	0.320916		95.1	-496.029	-388.914		95.1	-0.00982	-0.00642	-0.00906	-0.00604	-0.00642	-0.00604	-0.00491	-0.00302		95.1	-5.60485	-17.1259	-26.7787	-64.4558	-51.3778	-43.2819	-27.7129
95.2	0.350484	0.289616		95.2	-496.341	-386.735		95.2	-0.00944	-0.00718	-0.00642	-0.00642	-0.00415	-0.00869	-0.00227	-0.00415		95.2	-5.60485	-17.1259	-28.9584	-64.7672	-50.1323	-43.9047	-25.5332
95.3	0.342712	0.281791		95.3	-493.227	-389.537		95.3	-0.01095	-0.00264	-0.00755	-0.0068	-0.00415	-0.00453	-0.00415	-0.00604		95.3	-6.85037	-21.1739	-28.0243	-61.342	-47.0185	-41.725	-26.156
95.4	0.362142	0.279835		95.4	-492.916	-387.357		95.4	-0.00755	-0.00566	-0.00529	-0.00566	-0.00529	-0.00415	-0.00529	-0.00415		95.4	-4.98209	-24.2877	-26.156	-66.6355	-42.0364	-38.2998	-29.2698
95.5	0.307739	0.275922		95.5	-500.077	-385.178		95.5	-0.00944	-0.0068	-0.00755	-0.00642	-0.00529	-0.00869	-0.00604	-0.00831		95.5	-8.40728	-23.9763	-29.8925	-70.372	-44.216	-39.8567	-31.4494
95.6	0.342712	0.275922		95.6	-499.455	-387.046		95.6	-0.01208	-0.00642	-0.01057	-0.00529	-0.00415	-0.00453	-0.00453	-0.00415		95.6	-11.5211	-23.3535	-27.4015	-68.5037	-45.1502	-39.8567	-29.2698
95.7	0.338826	0.268097		95.7	-493.538	-394.831		95.7	-0.01171	-0.00453	-0.00529	-0.00604	-0.00604	-0.00642	-0.00302	-0.00415		95.7	-7.16175	-22.4194	-27.7129	-62.2761	-39.8567	-42.0364	-31.1381
95.8	0.331054	0.279835		95.8	-491.047	-409.466		95.8	-0.00982	-0.00491	-0.0068	-0.0068	-0.00415	-0.00906	-0.0034	-0.00529		95.8	-5.60485	-24.5991	-34.2519	-67.5696	-42.3478	-38.6112	-33.9405
95.9	0.401001	0.273966		95.9	-495.407	-425.969		95.9	-0.0102	-0.00604	-0.00566	-0.00529	-0.00566	-0.0034	-0.00453	-0.00378		95.9	-6.22761	-24.5991	-33.0063	-66.9468	-38.2998	-43.2819	-35.4974
96	0.377686	0.289616		96	-501.946	-426.903		96	-0.00869	-0.00831	-0.00415	-0.00604	-0.0034	-0.00227	-0.00302	-0.00453		96	-5.29347	-22.4194	-33.3177	-69.4379	-33.3177	-38.2998	-33.6291
96.1	0.377686	0.273966		96.1	-515.646	-431.262		96.1	-0.00906	-0.0068	-0.00529	-0.00906	-0.00453	-0.00529	-0.00415	-0.00453		96.1	-7.16175	-26.156	-30.5153	-66.0127	-38.6112	-35.4974	-32.3836
96.2	0.319397	0.262228		96.2	-518.449	-435.31		96.2	-0.00831	-0.00604	-0.00566	-0.00264	-0.0034	-0.00415	-0.00529	-0.00869		96.2	-7.47313	-22.7308	-37.9884	-68.8151	-34.5632	-37.0543	-30.8267
96.3	0.404887	0.281791		96.3	-510.664	-425.346		96.3	-0.01322	-0.00264	-0.00566	-0.00755	-0.00415	-0.00491	-0.00302	-0.00642		96.3	-5.60485	-27.7129	-35.4974	-68.5037	-38.9226	-34.5632	-33.6291
96.4	0.389343	0.28766		96.4	-506.305	-420.675		96.4	-0.0102	-0.00529	-0.00604	-0.00831	-0.00604	-0.0068	-0.00302	-0.00491		96.4	-7.47313	-29.2698	-31.4494	-70.372	-31.1381	-35.186	-33.0063
96.5	0.366028	0.270053		96.5	-502.257	-424.723		96.5	-0.00831	-0.00566	-0.00604	-0.00151	-0.00302	-0.00491	-0.00415	-0.00491		96.5	-8.71866	-28.647	-33.9405	-73.7972	-34.2519	-36.1202	-36.7429
96.6	0.401001	0.283747		96.6	-503.191	-426.28		96.6	-0.01284	-0.00566	-0.00227	-0.00378	-0.00151	-0.00566	-0.00264	-0.00604		96.6	-7.16175	-26.156	-33.9405	-70.0606	-36.4315	-33.3177	-33.9405
96.7	0.3738	0.273966		96.7	-506.305	-422.855		96.7	-0.00982	-0.00604	-0.00642	-0.00529	-0.00453	-0.00529	-0.00264	-0.00566		96.7	-8.0959	-28.9584	-32.3836	-68.5037	-35.8088	-38.9226	-33.9405
96.8	0.342712	0.277878		96.8	-512.221	-413.825		96.8	-0.0102	-0.00642	-0.01057	-0.00302	-0.00642	-0.00566	-0.00453	-0.00491		96.8	-6.85037	-27.0901	-32.695	-67.881	-35.4974	-41.725	-36.1202
96.9	0.381572	0.28766		96.9	-512.221	-403.238		96.9	-0.01057	-0.00491	-0.00378	-0.00604	-0.00227	-0.00529	-0.00227	-0.0068		96.9	-6.85037	-25.8446	-37.9884	-70.0606	-38.9226	-42.9705	-31.1381
97	0.424317	0.305266		97	-506.928	-410.711		97	-0.00906	-0.00604	-0.00642	-0.00642	-0.00566	-0.00491	-0.0034	-0.00227		97	-4.98209	-22.7308	-33.6291	-71.9289	-41.1022	-41.1022	-27.7129
97.1	0.3738	0.30331		97.1	-506.928	-418.496		97.1	-0.01435	-0.00642	-0.00491	-0.00529	-0.00453	-0.00566	-0.00227	-0.00415		97.1	-7.47313	-20.5511	-36.1202	-68.8151	-33.0063	-37.6771	-28.9584
97.2	0.362142	0.320916		97.2	-509.73	-413.513		97.2	-0.00831	-0.00869	-0.00604	-0.00491	-0.00113	-0.00869	-0.00453	-0.00642		97.2	-5.60485	-22.4194	-33.6291	-68.1924	-35.4974	-41.1022	-30.5153
97.3	0.393229	0.295485		97.3	-510.976	-411.957		97.3	-0.00982	-0.00831	-0.00378	-0.0068	-0.00302	-0.0068	0.000378	-0.00793		97.3	-4.67071	-20.2397	-33.3177	-69.7493	-36.7429	-46.0843	-29.8925
97.4	0.393229	0.295485		97.4	-513.467	-410.4		97.4	-0.01246	-0.00529	-0.0068	-0.00378	-0.00718	-0.00491	-0.00189	-0.00755		97.4	-6.22761	-21.4853	-36.1202	-71.6175	-36.4315	-43.9047	-29.5812
97.5	0.3738	0.295485		97.5	-509.419	-406.663		97.5	-0.01397	-0.0034	-0.00718	-0.00378	-0.00189	-0.00604	-0.00227	-0.00604		97.5	-6.22761	-21.4853	-33.3177	-70.9948	-38.2998	-46.3957	-28.647
97.6	0.389343	0.305266		97.6	-498.832	-411.645		97.6	-0.00906	-0.00566	-0.00755	-0.00869	-0.00151	-0.0068	-0.0034	-0.00227		97.6	-8.71866	-21.7966	-33.3177	-67.5696	-37.6771	-42.3478	-30.2039
97.7	0.424317	0.297441		97.7	-500.389	-411.022		97.7	-0.00793	-0.00755	-0.00604	-0.0068	-0.00566	-0.00642	-0.00378	-0.00642		97.7	-6.85037	-21.7966	-29.8925	-64.4558	-38.6112	-45.1502	-34.5632
97.8	0.3738	0.330698		97.8	-508.173	-403.549		97.8	-0.00718	-0.00491	-0.00529	-0.00604	-0.00415	-0.00302	-0.00227	-0.00491		97.8	-8.71866	-19.617	-28.0243	-63.833	-33.9405	-47.6412	-39.234
97.9	0.401001	0.33461		97.9	-503.191	-401.681		97.9	-0.00906	-0.00604	-0.0068	-0.0034	-0.00302	-0.00566	-0.00151	-0.00566		97.9	-7.47313	-24.9104	-29.5812	-63.833	-32.695	-47.3299	-38.9226
98	0.420431	0.322873		98	-503.191	-404.172		98	-0.00982	-0.00944	-0.00227	-0.00491	-0.00415	-0.00982	-0.00453	-0.0068		98	-6.22761	-22.7308	-30.8267	-68.5037	-37.9884	-46.3957	-34.2519
98.1	0.397115	0.315048		98.1	-505.682	-404.172		98.1	-0.00944	-0.00906	-0.00453	-0.00642	-0.00415	-0.00453	-0.00453	-0.00529		98.1	-6.53899	-21.7966	-31.4494	-72.2403	-38.6112	-48.264	-38.2998
98.2	0.412659	0.31896		98.2	-498.832	-401.058		98.2	-0.01133	-0.00642	-0.00566	-0.00378	-0.00415	-0.00869	-0.00491	-0.00491		98.2	-5.91623	-24.5991	-33.3177	-74.1086	-35.8088	-46.3957	-31.1381
98.3	0.401001	0.291572		98.3	-498.209	-410.088		98.3	-0.01511	-0.00415	-0.00642	-0.00718	-0.00529	-0.00113	-0.00529	-0.0068		98.3	-8.0959	-25.5332	-32.3836	-72.8631	-34.2519	-50.1323	-32.695
98.4	0.424317	0.295485		98.4	-501.946	-420.675		98.4	-0.0136	-0.00869	-0.00755	-0.00604	-0.00264	-0.00793	-0.0034	-0.00604		98.4	-4.67071	-24.5991	-30.8267	-74.1086	-39.5453	-45.4616	-31.7608
98.5	0.404887	0.309179		98.5	-505.371	-422.544		98.5	-0.00906	-0.00718	-0.00491	-0.00491	-0.00491	-0.00566	-0.00302	-0.00529		98.5	-7.47313	-27.4015	-31.4494	-78.4679	-39.8567	-44.8388	-35.4974
98.6	0.455404	0.30331		98.6	-507.862	-424.723		98.6	-0.0102	-0.00529	-0.00491	-0.00529	-0.00566	-0.00642	-0.00264	-0.0068		98.6	-7.47313	-27.7129	-34.8746	-80.959	-41.725	-50.4437	-33.6291
98.7	0.408773	0.317004		98.7	-505.994	-426.28		98.7	-0.01208	-0.00566	-0.00755	-0.0068	-0.00227	-0.00415	-0.00378	-0.00604		98.7	-8.71866	-23.9763	-34.8746	-78.7793	-39.5453	-52.6233	-34.8746
98.8	0.401001	0.301354		98.8	-500.077	-427.214		98.8	-0.01057	-0.00453	-0.00378	-0.0068	-0.00151	-0.00566	-0.00227	-0.00529		98.8	-8.40728	-25.5332	-30.8267	-70.372	-37.0543	-53.2461	-31.4494
98.9	0.401001	0.313091		98.9	-505.059	-420.675		98.9	-0.0102	-0.0068	-0.00566	-0.00189	-0.00491	-0.0068	-0.000755	-0.00264		98.9	-6.22761	-23.3535	-29.8925	-72.8631	-36.7429	-49.1981	-30.8267
99	0.439861	0.313091		99	-512.533	-418.184		99	-0.0136	-0.0068	-0.00566	-0.00415	-0.00264	-0.00491	-0.00189	-0.00793		99	-4.35933	-28.3356	-30.2039	-68.5037	-37.3657	-56.3599	-33.9405
99.1	0.428203	0.30331		99.1	-510.353	-425.035		99.1	-0.01322	-0.00793	-0.00718	-0.0068	-0.00189	-0.0068	-0.00529	-0.00529		99.1	-8.0959	-28.647	-30.2039	-71.3062	-40.1681	-52.3119	-33.6291
99.2	0.412659	0.30331		99.2	-499.766	-418.807		99.2	-0.01284	-0.0068	-0.00227	-0.00906	-0.00151	-0.00378	0.000378	-0.00453		99.2	-6.22761	-26.156	-30.2039	-70.9948	-36.1202	-52.9347	-33.9405
99.3	0.45929	0.320916		99.3	-502.257	-423.166		99.3	-0.01171	-0.0068	-0.00453	-0.00227	-0.00151	-0.00566	-0.00378	-0.00491		99.3	-4.98209	-29.8925	-30.5153	-63.833	-37.9884	-50.755	-28.647
99.4	0.435975	0.344392		99.4	-506.928	-417.873		99.4	-0.01095	-0.00604	-0.00302	-0.00793	-0.00264	-0.00453	-0.00189	-0.00491		99.4	-8.40728	-23.0422	-33.9405	-66.9468	-33.9405	-56.6713	-33.9405
99.5	0.455404	0.330698		99.5	-502.88	-415.07		99.5	-0.01473	-0.00755	-0.00529	-0.00831	-0.0034	-0.00793	-0.00151	-0.00415		99.5	-6.53899	-17.4373	-31.4494	-66.3241	-27.4015	-59.4737	-37.0543
99.6	0.455404	0.256359		99.6	-505.994	-410.4		99.6	-0.00982	-0.0102	-0.0068	-0.00529	-0.00566	-0.00642	-0.00264	-0.00453		99.6	-8.0959	-22.4194	-35.4974	-65.0786	-30.2039	-58.2282	-39.234
99.7	0.432089	0.099857		99.7	-507.862	-415.07		99.7	-0.00869	-0.00793	-0.00491	-0.00529	-0.0068	-0.00453	-0.00264	-0.00604		99.7	-6.85037	-27.4015	-33.3177	-66.9468	-28.647	-52.9347	-36.4315
99.8	0.455404	0.495025		99.8	-503.502	-411.645		99.8	-0.01284	-0.00453	-0.00302	-0.00378	-0.00302	-0.0068	-0.00151	-0.00529		99.8	-6.22761	-27.0901	-36.1202	-65.3899	-25.8446		-35.4974
99.9	0.432089	0.389386		99.9	-496.963	-419.43		99.9	-0.01284	-0.00944	-0.00491	-0.00529	-0.00566	-0.0068	-0.00491	-0.00378		99.9	-4.35933	-36.7429	-34.8746	-69.1265	-32.695		-38.2998
100	0.428203	0.324829		100	-494.784	-422.544		100	-0.01133	-0.00566	-0.00566	-0.00491	-0.00189	-0.00415	-0.00642	-0.01057		100	-3.42519	-33.9405	-31.1381	-64.4558	-34.2519		-36.4315
100.1	0.408773	0.336567		100.1	-499.455	-420.052		100.1	-0.0102	-0.00604	-0.00529	-0.00642	-0.00151	-0.00453	-0.00151	-0.00453		100.1	-5.60485	-31.7608	-36.4315	-61.0306	-33.0063		-38.2998
100.2	0.424317	0.295485		100.2	-505.994	-419.741		100.2	-0.00755	-0.00415	-0.00491	-0.00642	-0.00227	-0.00566	-0.00264	-0.00491		100.2	-6.53899	-25.2218	-37.0543	-69.7493	-30.5153		-35.4974
100.3	0.509808	0.230928		100.3	-510.041	-426.28		100.3	-0.00831	-0.00906	-0.00264	-0.00642	-0.0034	-0.00415	-0.00378	-0.0068		100.3	-7.78452	-25.8446	-35.186	-68.1924	-30.8267		-37.0543
100.4	0.451519	0.315048		100.4	-514.089	-425.657		100.4	-0.01208	-0.00718	-0.00529	-0.00944	-0.0034	-0.00566	-0.00189	-0.00755		100.4	-9.03004	-27.0901	-32.695	-69.7493	-29.8925		-37.0543
100.5	0.420431	0.373736		100.5	-513.467	-423.478		100.5	-0.01171	-0.00755	-0.00491	-0.0102	-0.00264	-0.0068	-0.000755	-0.00302				-26.4674	-33.0063
100.6	0.397115	0.336567		100.6	-518.137	-434.065		100.6	-0.00982	-0.01057	-0.00378	-0.00755	0	-0.0068	-0.00264	-0.00453				-23.0422	-30.8267
100.7	0.467062	0.311135		100.7	-520.94	-436.867		100.7	-0.01208	-0.0068	-0.00604	-0.00642	-0.00415	-0.00415	-0.00264	-0.00566				-29.5812	-32.3836
100.8	0.482606	0.307222		100.8	-516.892	-435.31		100.8	-0.01208	-0.00793	-0.00302	-0.00415	-0.0034	-0.00566	-0.00189	-0.00642				-22.4194	-30.5153
100.9	0.474834	0.330698		100.9	-512.221	-437.801		100.9	-0.01284	-0.00566	-0.00415	-0.00755	-0.00227	-0.00831	-0.00378	-0.00604				-24.9104	-33.6291
101	0.47872	0.31896		101	-505.059	-440.292		101	-0.01397	-0.0068	-0.00264	-0.00869	-0.00227	-0.00453	-0.00604	-0.0034				-25.5332	-35.4974
101.1	0.502036	0.317004		101.1	-503.191	-437.178		101.1	-0.00982	-0.00982	-0.00755	-0.00642	-0.00151	-0.00453	-0.00151	-0.00378				-27.7129	-33.0063
101.2	0.521466	0.33461		101.2	-497.586	-423.166		101.2	-0.01057	-0.00831	-0.00415	-0.00642	-0.00378	-0.00415	-0.00151	-0.00642
101.3	0.463176	0.350261		101.3	-495.095	-416.005		101.3	-0.01171	-0.00453	-0.00189	-0.00944	-0.00453	-0.00491	-0.00264	-0.00566
101.4	0.494264	0.326785		101.4	-489.802	-412.579		101.4	-0.01057	-0.00755	-0.00491	-0.00642	-0.00302	-0.0068	-0.0034	-0.00642
101.5	0.521466	0.340479		101.5	-493.227	-415.07		101.5	-0.01397	-0.00529	-0.00529	-0.0068	-0.00378	-0.0034	-0.00491	-0.00453
101.6	0.525352	0.330698		101.6	-491.981	-408.531		101.6	-0.01171	-0.00529	-0.00642	-0.00869	-0.00264	-0.00453	0.000755	-0.00264
101.7	0.428203	0.338523		101.7	-490.736	-416.005		101.7	-0.00869	-0.00642	-0.00264	-0.00718	-0.00415	-0.0068	-0.00491	-0.0034
101.8	0.412659	0.361998		101.8	-483.574	-422.855		101.8	-0.01246	-0.00944	-0.00415	-0.00642	-0.00529	-0.0034	-0.00529	-0.00529
101.9	0.439861	0.358086		101.9	-480.149	-419.118		101.9	-0.01171	-0.00831	-0.00453	-0.01095	-0.00302	-0.00566	-0.00227	-0.00415
102	0.439861	0.342435		102	-486.999	-410.088		102	-0.01171	-0.0068	-0.00264	-0.00604	-0.00264	-0.00264	-0.00189	-0.00491
102.1	0.432089	0.344392		102.1	-490.113	-393.274		102.1	-0.01057	-0.00793	-0.000755	-0.0068	-0.00491	-0.0068	-0.00453	-0.00302
102.2	0.45929	0.332654		102.2	-491.981	-385.489		102.2	-0.01133	-0.0102	-0.00302	-0.00604	-0.00264	-0.00491	-0.00491	-0.00264
102.3	0.467062	0.336567		102.3	-493.538	-379.262		102.3	-0.01133	-0.00604	-0.00453	-0.00755	-0.00264	-0.00491	-0.00151	-0.00604
102.4	0.474834	0.326785		102.4	-486.688	-382.687		102.4	-0.01208	-0.0102	-0.00491	-0.0068	-0.00378	-0.00264	-0.00302	-0.00529
102.5	0.470948	0.320916		102.5	-491.047	-378.95		102.5	-0.01133	-0.00566	-0.00227	-0.00906	-0.00378	-0.00491	-0.00566	-0.0068
102.6	0.463176	0.350261		102.6	-483.885	-368.052		102.6	-0.0102	-0.0102	-0.00302	-0.00982	-0.00415	-0.00566	-0.00302	-0.00529
102.7	0.45929	0.33461		102.7	-480.46	-373.968		102.7	-0.01095	-0.01246	-0.00642	-0.00906	-0.00227	-0.00831	-0.00378	-0.00491
102.8	0.463176	0.33461		102.8	-480.772	-384.866		102.8	-0.00906	-0.00566	-0.00491	-0.0068	-0.00227	-0.00227	-0.00151	-0.00264
102.9	0.467062	0.340479		102.9	-477.969	-394.831		102.9	-0.00906	-0.01171	-0.00718	-0.00793	-0.00151	-0.00302	-0.00529	-0.00227
103	0.470948	0.33461		103	-475.478	-388.292		103	-0.01473	-0.0068	-0.0034	-0.01095	-0.00491	-0.00378	-0.00264	-0.00264
103.1	0.439861	0.336567		103.1	-480.46	-398.567		103.1	-0.0102	-0.00415	-0.000378	-0.00793	-0.00378	-0.00378	-0.00415	-0.00529
103.2	0.486492	0.342435		103.2	-480.149	-408.22		103.2	-0.00906	-0.00604	-0.00264	-0.00755	-0.00566	-0.0068	-0.00227	-0.00264
103.3	0.502036	0.338523		103.3	-485.442	-403.549		103.3	-0.00944	-0.00944	-0.00264	-0.00793	-0.00529	-0.00453	-0.00264	-0.00566
103.4	0.502036	0.332654		103.4	-482.329	-398.567		103.4	-0.00944	-0.00718	-0.00415	-0.00529	-0.00113	-0.00189	-0.0034	-0.00189
103.5	0.49815	0.33461		103.5	-486.065	-396.699		103.5	-0.01095	-0.00944	-0.000755	-0.00755	-0.00566	-0.00642	-0.00566	-0.00378
103.6	0.432089	0.338523		103.6	-486.688	-387.98		103.6	-0.00944	-0.0068	-0.00415	-0.00793	-0.00264	-0.00491	-0.00264	-0.00189
103.7	0.470948	0.33461		103.7	-489.179	-387.357		103.7	-0.01171	-0.00982	-0.00453	-0.01095	-0.00491	-0.00491	-0.00491	-0.00529
103.8	0.467062	0.31896		103.8	-490.736	-376.771		103.8	-0.00831	-0.00944	-0.00378	-0.00718	-0.00264	-0.00415	-0.00151	-0.00642
103.9	0.474834	0.358086		103.9	-488.556	-386.112		103.9	-0.01057	-0.00566	0	-0.00906	-0.00566	-0.00378	-0.00566	-0.00491
104	0.451519	0.363954		104	-488.556	-389.537		104	-0.00793	-0.00906	-0.00529	-0.00529	-0.00378	-0.00378	-0.00415	-0.00302
104.1	0.505922	0.354173		104.1	-492.604	-397.01		104.1	-0.00869	-0.00642	-0.00491	-0.00755	-0.00529	-0.00491	-0.00491	-0.00378
104.2	0.474834	0.354173		104.2	-488.245	-404.795		104.2	-0.01133	-0.00755	-0.0034	-0.01095	-0.00491	-0.00453	-0.00453	-0.00566
104.3	0.455404	0.358086		104.3	-484.82	-405.418		104.3	-0.00755	-0.01246	-0.00302	-0.00982	-0.00529	-0.00453	-0.00566	-0.00227
104.4	0.463176	0.352217		104.4	-483.574	-406.974		104.4	-0.01057	-0.00529	-0.0034	-0.00793	-0.00378	-0.00491	-0.00566	-0.00151
104.5	0.467062	0.354173		104.5	-487.933	-401.992		104.5	-0.0102	-0.00642	-0.00227	-0.00906	-0.00264	-0.00529	-0.00378	-0.00378
104.6	0.463176	0.350261		104.6	-483.574	-401.37		104.6	-0.00793	-0.00642	-0.00453	-0.01057	-0.00378	-0.00378	-0.00529	-0.00642
104.7	0.463176	0.352217		104.7	-491.67	-408.843		104.7	-0.0068	-0.00869	-0.00189	-0.00906	-0.00604	-0.00113	-0.00529	-0.00378
104.8	0.486492	0.356129		104.8	-489.802	-413.825		104.8	-0.01057	-0.00718	-0.00378	-0.00906	-0.00529	-0.0034	-0.00453	-0.00302
104.9	0.505922	0.367867		104.9	-485.754	-405.729		104.9	-0.00831	-0.0068	-0.0034	-0.00906	-0.00264	-0.000378	-0.00604	-0.00378
105	0.428203	0.360042		105	-489.802	-401.992		105	-0.01133	-0.00944	-0.00151	-0.00831	-0.00415	-0.00227	-0.00378	-0.00566
105.1	0.404887	0.340479		105.1	-490.736	-406.974		105.1	-0.00755	-0.00604	-0.00453	-0.00869	-0.00755	-0.00453	-0.00189	-0.00264
105.2	0.482606	0.356129		105.2	-485.754	-402.615		105.2	-0.00566	-0.00869	-0.00151	-0.00982	-0.0034	-0.00604	-0.00453	-0.0034
105.3	0.513694	0.346348		105.3	-483.574	-393.274		105.3	-0.01208	-0.00944	-0.00453	-0.01208	-0.00642	-0.00453	-0.00529	-0.00264
105.4	0.439861	0.340479		105.4	-472.676	-390.783		105.4	-0.0102	-0.00944	-0.00415	-0.01133	-0.00491	-0.00264	-0.00453	-0.00415
105.5	0.447633	0.354173		105.5	-468.316	-378.639		105.5	-0.00566	-0.00566	-0.00378	-0.00944	-0.00566	-0.00302	-0.00566	-0.00415
105.6	0.435975	0.332654		105.6	-465.203	-381.13		105.6	-0.01057	-0.00755	-0.00264	-0.0068	-0.00491	-0.00264	-0.00529	-0.00415
105.7	0.482606	0.385474		105.7	-471.43	-375.836		105.7	-0.00906	-0.00906	-0.00264	-0.00982	-0.00529	-0.000378	-0.00491	-0.000755
105.8	0.435975	0.363954		105.8	-473.61	-369.92		105.8	-0.00831	-0.00453	-0.00415	-0.00906	-0.00529	-0.0034	-0.0034	-0.00189
105.9	0.385458	0.361998		105.9	-476.101	-360.579		105.9	-0.00755	-0.00566	-0.00264	-0.00869	-0.00718	-0.00604	-0.00529	-0.00227
106	0.486492	0.385474		106	-482.951	-360.89		106	-0.00944	-0.00604	-0.00415	-0.00793	-0.00415	-0.00491	-0.00529	-0.00566
106.1	0.486492	0.367867		106.1	-488.556	-365.249		106.1	-0.00831	-0.00529	-0.00264	-0.00378	-0.00453	-0.00453	-0.00491	-0.0034
106.2	0.502036	0.373736		106.2	-483.574	-357.465		106.2	-0.00755	-0.00906	-0.00491	-0.01246	-0.00415	-0.00529	-0.00378	0.000378
106.3	0.451519	0.375692		106.3	-486.377	-355.908		106.3	-0.01208	-0.00415	-0.0034	-0.01095	-0.00491	-0.00151	-0.00378	-0.0034
106.4	0.45929	0.365911		106.4	-482.017	-370.232		106.4	-0.01057	-0.00793	-0.00566	-0.00755	-0.0034	-0.00302	-0.00529	-0.00151
106.5	0.45929	0.356129		106.5	-472.987	-388.603		106.5	-0.0068	-0.00793	-0.00264	-0.01095	-0.00642	-0.00491	-0.00529	-0.00189
106.6	0.470948	0.360042		106.6	-480.149	-386.112		106.6	-0.00642	-0.00642	-0.0034	-0.01322	-0.00566	-0.00189	-0.00566	-0.00302
106.7	0.540895	0.369823		106.7	-478.281	-377.082		106.7	-0.00906	-0.00718	-0.00453	-0.00566	-0.00378	-0.00453	-0.00529	-0.00415
106.8	0.470948	0.363954		106.8	-472.676	-364.004		106.8	-0.01095	-0.00906	-0.00718	-0.00944	-0.00529	-0.00415	-0.00415	-0.00566
106.9	0.432089	0.367867		106.9	-467.382	-369.92		106.9	-0.00906	-0.00453	-0.00189	-0.0102	-0.00604	-0.00302	-0.00264	-0.00227
107	0.467062	0.367867		107	-465.203	-376.771		107	-0.00378	-0.00415	-0.00151	-0.01133	-0.00604	-0.00302	-0.00378	-0.0034
107.1	0.529237	0.346348		107.1	-468.628	-385.489		107.1	-0.00642	-0.00415	-0.00491	-0.01095	-0.0068	-0.00529	-0.00566	-0.00642
107.2	0.470948	0.358086		107.2	-477.346	-387.357		107.2	-0.00906	-0.00944	-0.00491	-0.0102	-0.00378	-0.00227	-0.00566	-0.00378
107.3	0.435975	0.354173		107.3	-476.101	-394.831		107.3	-0.00718	-0.00566	-0.0034	-0.0102	-0.00566	-0.00189	-0.00415	-0.00302
107.4	0.474834	0.358086		107.4	-472.053	-401.992		107.4	-0.00944	-0.00189	-0.00189	-0.0102	-0.00566	-0.000755	-0.00642	-0.00151
107.5	0.443747	0.354173		107.5	-472.364	-402.927		107.5	-0.0102	-0.00869	-0.00755	-0.00604	-0.00491	-0.00227	-0.00642	-0.000378
107.6	0.443747	0.360042		107.6	-476.101	-407.597		107.6	-0.00566	-0.00566	-0.00415	-0.00982	-0.0068	-0.00151	-0.0068	-0.0034
107.7	0.412659	0.365911		107.7	-472.987	-403.861		107.7	-0.0102	-0.00793	-0.00529	-0.00869	-0.00604	-0.00189	-0.0068	-0.00378
107.8	0.404887	0.383517		107.8	-467.382	-400.435		107.8	-0.00944	-0.00529	-0.00378	-0.00906	-0.00831	-0.00566	-0.00453	-0.00264
107.9	0.412659	0.348304		107.9	-467.382	-397.01		107.9	-0.00642	-0.00755	-0.00113	-0.00831	-0.00529	-0.00415	-0.00529	0
108	0.432089	0.356129		108	-471.742	-402.615		108	-0.01208	-0.00566	-0.00302	-0.00906	-0.00415	0.000755	-0.00642	-0.00264
108.1	0.45929	0.369823		108.1	-474.855	-400.747		108.1	-0.0102	-0.00566	-0.00831	-0.01057	-0.00642	-0.00151	-0.00529	-0.00378
108.2	0.49815	0.352217		108.2	-472.676	-401.992		108.2	-0.00718	-0.00264	-0.00415	-0.00944	-0.00604	-0.0034	-0.00264	-0.00415
108.3	0.447633	0.330698		108.3	-475.79	-402.304		108.3	-0.00982	-0.00529	-0.00453	-0.00944	-0.00529	-0.00415	-0.00415	0.00151
108.4	0.424317	0.350261		108.4	-480.149	-402.304		108.4	-0.00566	-0.00718	-0.00415	-0.01095	-0.00566	-0.00529	-0.00831	-0.00264
108.5	0.381572	0.367867		108.5	-484.82	-388.914		108.5	-0.00831	-0.00642	-0.00604	-0.00982	-0.00642	-0.00151	-0.0068	-0.00113
108.6	0.377686	0.356129		108.6	-482.329	-380.196		108.6	-0.00982	-0.00793	-0.00227	-0.01057	-0.00642	-0.00227	-0.00491	-0.00491
108.7	0.45929	0.356129		108.7	-483.885	-385.178		108.7	-0.00831	-0.00529	-0.00491	-0.00944	-0.00604	-0.00604	-0.00718	-0.00415
108.8	0.397115	0.354173		108.8	-486.377	-382.998		108.8	-0.00604	-0.00642	-0.00755	-0.00642	-0.00642	-0.00453	-0.00529	-0.00302
108.9	0.362142	0.360042		108.9	-484.508	-385.178		108.9	-0.0068	-0.00642	-0.00415	-0.0102	-0.00831	0	-0.00453	0.000755
109	0.397115	0.338523		109	-481.083	-392.651		109	-0.00831	-0.00793	-0.00415	-0.01133	-0.00566	-0.00642	-0.00529	-0.00566
109.1	0.393229	0.342435		109.1	-483.885	-385.801		109.1	-0.00982	-0.0068	-0.00453	-0.0102	-0.00755	-0.00227	-0.00529	-0.00378
109.2	0.369914	0.360042		109.2	-483.574	-378.327		109.2	-0.00566	-0.00566	-0.00755	-0.00755	-0.00642	-0.00227	-0.00566	-0.00189
109.3	0.366028	0.346348		109.3	-486.999	-370.854		109.3	-0.00642	-0.00453	-0.00604	-0.00944	-0.00982	-0.00378	-0.00529	-0.00189
109.4	0.404887	0.344392		109.4	-489.49	-382.998		109.4	-0.00944	-0.00529	-0.00453	-0.00604	-0.00566	-0.00491	-0.00718	-0.00264
109.5	0.3738	0.342435		109.5	-491.047	-389.537		109.5	-0.00755	-0.00793	-0.00453	-0.01095	-0.00906	-0.00151	-0.00604	-0.00491
109.6	0.385458	0.338523		109.6	-496.341	-390.783		109.6	-0.00604	-0.00453	-0.00566	-0.00869	-0.00378	0	-0.00831	-0.00151
109.7	0.381572	0.342435		109.7	-489.802	-393.896		109.7	-0.00944	-0.00566	-0.00566	-0.00906	-0.00491	-0.00566	-0.00755	-0.00491
109.8	0.362142	0.33461		109.8	-485.754	-396.388		109.8	-0.00642	-0.00566	-0.00378	-0.00491	-0.0068	-0.00604	-0.00264	-0.00604
109.9	0.3738	0.328741		109.9	-482.64	-399.19		109.9	-0.00566	-0.00453	-0.00718	-0.00604	-0.00264	-0.00189	-0.0034	-0.00189
110	0.401001	0.342435		110	-482.017	-405.106		110	-0.0068	-0.00642	-0.00302	-0.0102	-0.00604	-0.00718	-0.0068	-0.00264
110.1	0.404887	0.330698		110.1	-491.047	-404.172		110.1	-0.01057	-0.00755	-0.00755	-0.01171	-0.00755	-0.00415	-0.00415	0.000378
110.2	0.416545	0.324829		110.2	-490.424	-401.058		110.2	-0.01057	-0.00378	-0.00793	-0.01057	-0.00604	-0.0034	-0.00642	-0.00227
110.3	0.401001	0.324829		110.3	-488.556	-406.352		110.3	-0.01473	-0.00378	-0.00453	-0.00755	-0.00982	-0.00189	-0.00604	-0.0034
110.4	0.416545	0.320916		110.4	-486.377	-410.088		110.4	-0.00831	-0.00793	-0.0068	-0.00944	-0.0068	-0.0034	-0.00453	-0.00227
				110.5	-488.868	-408.843		110.5	-0.00793	-0.00566	-0.00264	-0.00906	-0.00755	-0.00491	-0.00604	-0.00151
				110.6	-482.329	-416.627		110.6	-0.00793	-0.00264	-0.00491	-0.00718	-0.00566	-0.00453	-0.00491	-0.00227
				110.7	-470.807	-413.825		110.7	-0.00755	-0.00566	-0.00566	-0.00944	-0.00453	-0.00302	-0.00453	-0.00302
				110.8	-474.855	-413.825		110.8	-0.00718	-0.00491	-0.00491	-0.0068	-0.00906	-0.00755	-0.00604	-0.00378
				110.9	-479.838	-419.741		110.9	-0.00944	-0.00151	-0.00566	-0.00566	-0.00982	-0.00189	-0.00491	-0.00415
				111	-481.394	-416.627		111	-0.00453	-0.00529	-0.00604	-0.01057	-0.00793	-0.00491	-0.00642	-0.0034
				111.1	-484.508	-411.645		111.1	-0.00982	-0.00302	-0.00378	-0.00944	-0.0068	-0.00415	-0.0068	-0.00491
				111.2	-485.131	-410.088		111.2	-0.00831	-0.00642	-0.00755	-0.00755	-0.00604	-0.00529	-0.00755	-0.00151
				111.3	-486.688	-399.19		111.3	-0.00793	-0.00566	-0.00566	-0.0068	-0.00642	-0.00453	-0.00491	-0.00378
				111.4	-484.197	-403.238		111.4	-0.01057	-0.00642	-0.00906	-0.00604	-0.00566	-0.00302	-0.00415	-0.00378
				111.5	-477.658	-411.022		111.5	-0.00793	-0.00566	-0.00491	-0.00755	-0.00793	-0.00566	-0.00529	-0.00227
				111.6	-478.592	-411.957		111.6	-0.00982	-0.00566	-0.00642	-0.00982	-0.00302	-0.00415	-0.00604	-0.00415
				111.7	-481.706	-411.957		111.7	-0.01246	-0.00415	-0.00491	-0.0068	-0.00642	-0.0034	-0.00378	-0.00453
				111.8	-484.508	-413.825		111.8	-0.0068	-0.00529	-0.00453	-0.00566	-0.0068	-0.00793	-0.00566	-0.00415
				111.9	-486.065	-415.382		111.9	-0.00869	-0.00529	-0.00982	-0.00755	-0.00755	-0.00566	-0.00604	-0.00264
				112	-484.82	-417.561		112	-0.01095	-0.00264	-0.00831	-0.01095	-0.0068	-0.00566	-0.00566	-0.00151
				112.1	-477.969	-409.154		112.1	-0.01246	-0.00566	-0.0068	-0.00906	-0.00529	-0.00491	-0.00718	-0.0068
				112.2	-472.364	-403.861		112.2	-0.01397	-0.00604	-0.00491	-0.00566	-0.0068	-0.00415	-0.00491	-0.00302
				112.3	-469.562	-402.927		112.3	-0.01511	-0.00566	-0.00793	-0.00944	-0.0068	-0.00491	-0.00302	-0.00302
				112.4	-463.646	-403.549		112.4	-0.00869	-0.00453	-0.00604	-0.00453	-0.00604	-0.0034	-0.00529	-0.00453
				112.5	-461.155	-400.747		112.5	-0.00906	-0.00642	-0.00793	-0.0102	-0.00604	-0.00378	-0.0068	-0.00378
				112.6	-469.251	-392.962		112.6	-0.01171	-0.00604	-0.00151	-0.00869	-0.0068	-0.00566	-0.00302	-0.00491
				112.7	-473.61	-387.046		112.7	-0.00906	-0.00189	-0.00566	-0.00529	-0.00793	-0.00491	-0.00491	-0.00453
				112.8	-477.658	-395.453		112.8	-0.01133	-0.00491	-0.00793	-0.00982	-0.00906	-0.00604	-0.00642	-0.00529
				112.9	-476.412	-384.866		112.9	-0.01171	-0.00378	-0.00264	-0.0068	-0.0068	-0.0034	-0.00415	-0.00415
				113	-477.658	-382.064		113	-0.00869	-0.00302	-0.0068	-0.00566	-0.00566	-0.00491	-0.00529	-0.00302
				113.1	-477.035	-389.226		113.1	-0.00793	-0.00378	-0.00755	-0.00604	-0.00529	-0.00604	-0.00529	-0.00604
				113.2	-472.364	-394.208		113.2	-0.00944	-0.00642	-0.00906	-0.00982	-0.00566	-0.00302	-0.0068	-0.00566
				113.3	-472.364	-385.489		113.3	-0.00869	-0.00566	-0.00755	-0.00831	-0.0068	-0.00529	-0.00604	-0.00491
				113.4	-468.628	-382.064		113.4	-0.00831	-0.00831	-0.00604	-0.00642	-0.00491	-0.00415	-0.00529	-0.00415
				113.5	-477.035	-385.178		113.5	-0.01057	-0.00189	-0.00718	-0.00642	-0.00566	-0.0068	-0.00604	-0.00302
				113.6	-483.885	-377.393		113.6	-0.00869	-0.00453	-0.00718	-0.0068	-0.0068	-0.00604	-0.00453	-0.00415
				113.7	-483.263	-382.064		113.7	-0.01133	-0.00566	-0.00604	-0.00604	-0.00378	-0.00302	-0.00491	-0.00378
				113.8	-479.838	-387.669		113.8	-0.01133	-0.00415	-0.00566	-0.00604	-0.00642	-0.00415	-0.00491	-0.00227
				113.9	-473.61	-393.896		113.9	-0.0102	-0.0034	-0.0068	-0.00566	-0.00453	-0.00604	-0.00415	-0.00906
				114	-478.592	-393.585		114	-0.00869	-0.00793	-0.00642	-0.00755	-0.0068	-0.00755	-0.00264	-0.00642
				114.1	-476.724	-391.405		114.1	-0.00793	-0.00642	-0.00831	-0.00491	-0.00793	-0.00453	-0.00491	-0.00415
				114.2	-478.281	-393.274		114.2	-0.00944	-0.00453	-0.0068	-0.00944	-0.00453	-0.00529	-0.00529	-0.0034
				114.3	-478.903	-395.453		114.3	-0.01246	-0.00604	-0.00906	-0.0068	-0.00415	-0.00604	-0.00453	-0.00415
				114.4	-481.394	-386.735		114.4	-0.01057	-0.00227	-0.00529	-0.0068	-0.00529	-0.00378	-0.00415	-0.00869
				114.5	-485.754	-381.441		114.5	-0.00793	-0.00264	-0.00378	-0.00453	-0.0034	-0.00415	-0.00453	-0.00227
				114.6	-484.82	-381.13		114.6	-0.00718	-0.00378	-0.00793	-0.00831	-0.00566	-0.00604	-0.00378	-0.00264
				114.7	-477.035	-380.507		114.7	-0.01057	-0.00755	-0.00302	-0.00491	-0.00453	-0.00378	-0.00227	-0.00189
				114.8	-472.364	-370.543		114.8	-0.00982	-0.00755	-0.00642	-0.0068	-0.0068	-0.00604	-0.00264	-0.00566
				114.9	-472.364	-371.166		114.9	-0.00642	-0.00491	-0.00566	-0.00755	-0.00529	-0.00793	-0.00189	-0.00793
				115	-477.658	-372.1		115	-0.01171	-0.00604	-0.00529	-0.00566	-0.00642	-0.00189	-0.0068	-0.00755
				115.1	-473.61	-369.297		115.1	-0.01171	-0.00529	-0.00755	-0.0068	-0.00491	-0.0034	-0.00378	-0.000755
				115.2	-471.119	-370.854		115.2	-0.0068	-0.00189	-0.00906	-0.00755	-0.00642	-0.0068	-0.00453	-0.00453
				115.3	-475.478	-370.543		115.3	-0.0102	-0.0068	-0.0068	-0.00566	-0.00491	-0.00982	-0.0034	-0.00453
				115.4	-479.838	-382.998		115.4	-0.00906	-0.00491	-0.00718	-0.00566	-0.00642	-0.00604	-0.00227	-0.00566
				115.5	-478.903	-382.687		115.5	-0.0102	-0.00302	-0.00415	-0.00566	-0.00415	-0.0034	-0.00151	-0.0068
				115.6	-470.496	-382.998		115.6	-0.00869	-0.00529	-0.00793	-0.0068	-0.00491	-0.00491	-0.00529	-0.00453
				115.7	-463.646	-384.866		115.7	-0.00906	-0.00869	-0.00718	-0.00604	-0.00378	-0.00755	-0.00453	-0.00264
				115.8	-470.496	-389.226		115.8	-0.01322	-0.00831	-0.00831	-0.00718	-0.00491	-0.00529	-0.00151	-0.00604
				115.9	-469.251	-387.669		115.9	-0.00831	-0.00453	-0.00869	-0.00869	-0.00642	-0.00491	-0.00491	-0.00529
				116	-472.987	-380.819		116	-0.01171	-0.00529	-0.00642	-0.0102	-0.00302	-0.00227	-0.00415	-0.00453
				116.1	-468.628	-374.28		116.1	-0.00944	-0.00566	-0.00529	-0.00415	-0.00604	-0.00642	-0.00378	-0.00718
				116.2	-467.382	-376.771		116.2	-0.01095	-0.00793	-0.00642	-0.00189	-0.00491	-0.00793	-0.0034	-0.00264
				116.3	-473.61	-367.741		116.3	-0.00831	-0.0034	-0.00529	-0.00831	-0.00529	-0.00453	-0.00415	-0.00529
				116.4	-479.526	-372.411		116.4	-0.01133	-0.00529	-0.00378	-0.0068	-0.00302	-0.00453	-0.00302	-0.00718
				116.5	-477.658	-385.489		116.5	-0.01057	-0.00718	-0.00491	-0.00642	-0.00302	-0.0068	-0.00302	-0.00869
				116.6	-486.688	-377.393		116.6	-0.0102	-0.00415	-0.00453	-0.00453	-0.0068	-0.00378	-0.00453	-0.00453
				116.7	-487.933	-383.621		116.7	-0.01208	-0.00151	-0.00604	-0.00604	-0.00415	-0.00642	-0.000755	-0.00566
				116.8	-486.999	-396.388		116.8	-0.01095	-0.00982	-0.00831	-0.00718	-0.00491	-0.00566	-0.0034	-0.00378
				116.9	-476.412	-391.717		116.9	-0.01057	-0.00566	-0.00491	-0.00755	-0.00491	-0.00718	-0.00491	-0.00302
				117	-466.137	-393.274		117	-0.01208	-0.00604	-0.00906	-0.00453	-0.00227	-0.00831	-0.00264	-0.00491
				117.1	-468.316	-399.813		117.1	-0.0102	-0.00264	-0.00491	-0.00453	-0.00529	-0.00491	-0.00227	-0.0034
				117.2	-474.544	-398.256		117.2	-0.0068	-0.0102	-0.0034	-0.00566	-0.00604	-0.00755	-0.00189	-0.00566
				117.3	-475.478	-401.37		117.3	-0.01095	-0.00604	-0.00566	-0.00302	-0.00755	-0.00604	-0.00189	-0.00566
				117.4	-473.921	-405.106		117.4	-0.01435	-0.00491	-0.00529	-0.0068	-0.00378	-0.00566	-0.00302	-0.00491
				117.5	-476.101	-406.974		117.5	-0.00944	-0.00415	-0.00415	-0.00529	-0.00264	-0.00718	-0.00302	-0.00755
				117.6	-472.987	-405.418		117.6	-0.01208	-0.00529	-0.00755	-0.00566	-0.00302	-0.0068	-0.00264	-0.00642
				117.7	-470.807	-407.909		117.7	-0.01171	-0.00755	-0.00529	-0.00566	-0.00453	-0.00529	0.000378	-0.00491
				117.8	-467.071	-411.334		117.8	-0.00869	-0.00869	-0.00642	-0.00453	-0.0034	-0.00491	-0.00378	-0.00378
				117.9	-463.334	-412.579		117.9	-0.00831	-0.00642	-0.00793	-0.01133	-0.00718	-0.00604	-0.00227	-0.00453
				118	-466.137	-406.352		118	-0.00944	-0.00529	-0.00378	-0.00415	-0.0034	-0.00453	-0.00264	-0.00604
				118.1	-461.155	-401.058		118.1	-0.00944	-0.00491	-0.00378	-0.00529	-0.00604	-0.00378	-0.00151	-0.0068
				118.2	-457.107	-404.795		118.2	-0.00566	-0.00906	-0.00302	-0.00529	-0.0034	-0.00718	-0.00453	-0.00793
				118.3	-456.173	-405.106		118.3	-0.0102	-0.00642	-0.00906	-0.00566	-0.000378	-0.00453	-0.00415	-0.00793
				118.4	-462.4	-402.927		118.4	-0.01246	-0.00529	-0.00566	-0.00604	-0.00718	-0.00793	-0.00113	-0.00491
				118.5	-473.299	-390.16		118.5	-0.01057	-0.00491	-0.00529	-0.00642	-0.00566	-0.00642	-0.00227	-0.0068
				118.6	-465.203	-395.453		118.6	-0.00982	-0.00755	-0.00566	-0.00566	-0.00529	-0.0068	-0.00415	-0.00604
				118.7	-462.4	-405.729		118.7	-0.01133	-0.00906	-0.0034	-0.0068	-0.00302	-0.00302	0.000378	-0.00378
				118.8	-455.238	-406.352		118.8	-0.00982	-0.00491	-0.00302	-0.00642	-0.00302	-0.0068	-0.00264	-0.00453
				118.9	-452.125	-396.076		118.9	-0.0102	-0.00453	-0.0034	-0.00604	-0.00189	-0.0068	-0.00302	-0.00453
				119	-451.813	-391.405		119	-0.01397	-0.00566	-0.00604	-0.00869	-0.00264	-0.00227	0.000378	-0.00566
				119.1	-455.861	-391.094		119.1	-0.01057	-0.00982	-0.00453	-0.00831	-0.00378	-0.00566	-0.00529	-0.00378
				119.2	-460.532	-387.669		119.2	-0.01057	-0.00529	-0.00415	-0.00944	-0.000378	-0.00566	-0.000755	-0.0068
				119.3	-466.76	-387.98		119.3	-0.01057	-0.00793	-0.00378	-0.00642	-0.00189	-0.00566	-0.00302	-0.00604
				119.4	-473.61	-408.843		119.4	-0.01057	-0.00529	-0.00566	-0.0034	-0.00378	-0.00755	-0.00264	-0.00604
				119.5	-474.233	-408.531		119.5	-0.00718	-0.00869	-0.00415	-0.00529	-0.00189	-0.00415	-0.00227	-0.00604
				119.6	-474.544	-401.058		119.6	-0.00831	-0.00642	-0.00529	-0.00793	-0.00415	-0.00529	-0.00227	-0.00529
				119.7	-471.742	-400.435		119.7	-0.0102	-0.00604	-0.00302	-0.00604	-0.00491	-0.00491	-0.00227	-0.00642
				119.8	-470.185	-399.813		119.8	-0.01284	-0.00642	-0.00378	-0.00831	-0.00453	-0.00415	-0.00189	-0.0068
				119.9	-469.562	-404.172		119.9	-0.00831	-0.0068	-0.0034	-0.0068	-0.00642	-0.00906	-0.00302	-0.00718
				120	-468.316	-411.645		120	-0.0102	-0.00793	-0.00378	-0.00529	-0.00453	-0.00227	-0.00227	-0.00529
				120.1	-463.023	-408.22		120.1	-0.01246	-0.00755	-0.00302	-0.00755	0.000378	-0.00604	-0.00227	-0.00604
				120.2	-456.795	-401.681		120.2	-0.01057	-0.0068	-0.00642	-0.00566	-0.00151	-0.00529	-0.000378	-0.00566
				120.3	-462.4	-395.765		120.3	-0.01624	-0.00642	-0.00718	-0.00755	-0.00227	-0.0034	-0.000378	-0.00491
				120.4	-460.221	-399.813		120.4	-0.01397	-0.00793	-0.00227	-0.00491	-0.00151	-0.00529	-0.00302	-0.00378
				120.5	-459.909	-401.992		120.5	-0.01133	-0.0102	-0.00378	-0.00906	-0.00189	-0.00378	-0.00302	-0.00604
				120.6	-459.598	-399.19		120.6	-0.00831	-0.00566	-0.00302	-0.00869	-0.00491	-0.00604	-0.00264	-0.00755
				120.7	-454.616	-405.106		120.7	-0.01171	-0.0068	-0.00529	-0.0068	-0.00529	-0.0068	-0.00378	-0.00491
				120.8	-459.598	-403.238		120.8	-0.0068	-0.00831	0.000755	-0.0068	-0.00529	-0.00642	-0.00302	-0.00491
				120.9	-461.777	-397.322		120.9	-0.01397	-0.00566	-0.0068	-0.0068	0	-0.0068	-0.0034	-0.00189
				121	-465.825	-386.735		121	-0.00906	-0.00906	-0.00264	-0.0068	0	-0.000755	-0.00151	-0.00453
				121.1	-463.023	-389.226		121.1	-0.01095	-0.00793	-0.0034	-0.0068	-0.0034	-0.00566	-0.00415	-0.00529
				121.2	-468.628	-397.01		121.2	-0.01057	-0.00604	-0.00453	-0.00642	-0.00189	-0.00264	-0.00264	-0.0068
				121.3	-468.628	-398.567		121.3	-0.01624	-0.00642	-0.00604	-0.00906	-0.00529	-0.00453	-0.000378	-0.00453
				121.4	-465.514	-394.208		121.4	-0.01775	-0.00604	-0.00453	-0.00415	-0.000378	-0.00642	-0.0034	-0.00453
				121.5	-467.071	-397.01		121.5	-0.01586	-0.00453	-0.00566	-0.01171	-0.00566	-0.00529	-0.00453	-0.00189
				121.6	-460.843	-395.142		121.6	-0.01057	-0.00642	-0.00604	-0.01133	-0.00491	-0.0034	-0.00378	-0.00604
				121.7	-462.712	-390.783		121.7	-0.01548	-0.00755	-0.0034	-0.00906	-0.00453	-0.00604	-0.00302	-0.00566
				121.8	-467.382	-391.094		121.8	-0.01397	-0.00982	-0.00604	-0.0068	-0.00227	-0.00529	-0.00189	-0.00264
				121.9	-466.137	-391.094		121.9	-0.01171	-0.00793	-0.00151	-0.0068	-0.00264	-0.00415	-0.000755	-0.00642
				122	-478.592	-385.801		122	-0.01171	-0.0068	-0.000755	-0.00831	-0.00453	-0.00453	-0.00529	-0.00604
				122.1	-476.724	-391.405		122.1	-0.0136	-0.00944	-0.00227	-0.00755	-0.00378	-0.00151	-0.00227	-0.00189
				122.2	-474.544	-394.208		122.2	-0.01208	-0.00869	-0.000755	-0.0068	-0.00151	-0.00491	-0.00151	-0.00529
				122.3	-468.316	-389.849		122.3	-0.00944	-0.00642	-0.00264	-0.00604	-0.00642	-0.00755	-0.00378	-0.0068
				122.4	-463.334	-386.423		122.4	-0.01095	-0.00831	-0.00415	-0.00906	-0.00227	-0.00415	-0.00529	-0.00529
				122.5	-467.694	-387.046		122.5	-0.0068	-0.00793	-0.00189	-0.00491	-0.0034	-0.0034	-0.00415	-0.0034
				122.6	-472.676	-386.735		122.6	-0.00793	-0.00529	-0.00566	-0.01057	-0.00227	-0.00566	-0.00302	-0.0034
				122.7	-485.442	-380.196		122.7	-0.01284	-0.0068	-0.00378	-0.00906	-0.00491	-0.00566	-0.00415	-0.00453
				122.8	-480.46	-373.657		122.8	-0.01511	-0.00944	-0.00944	-0.0068	-0.00302	-0.00302	-0.0034	-0.0034
				122.9	-476.724	-365.561		122.9	-0.01473	-0.00982	-0.00566	-0.00982	-0.00378	-0.00151	-0.000755	-0.00453
				123	-468.628	-366.806		123	-0.01208	-0.0102	-0.0034	-0.00982	-0.00415	-0.00529	-0.00529	-0.00453
				123.1	-463.646	-366.495		123.1	-0.00793	-0.00793	0	-0.00566	-0.00566	-0.00642	-0.00302	-0.00604
				123.2	-460.843	-365.561		123.2	-0.00982	-0.00453	-0.00151	-0.0034	-0.00264	-0.00415	-0.00566	-0.00642
				123.3	-465.203	-366.184		123.3	-0.01208	-0.00566	-0.00529	-0.00793	-0.00264	-0.0034	-0.00302	-0.00189
				123.4	-470.496	-360.267		123.4	-0.01095	-0.00906	-0.00189	-0.0068	-0.00604	-0.00642	-0.00227	-0.00264
				123.5	-461.466	-352.483		123.5	-0.00982	-0.00755	-0.00566	-0.00604	-0.00415	-0.00453	-0.0034	-0.00491
				123.6	-453.993	-347.812		123.6	-0.01133	-0.00906	-0.00264	-0.00906	-0.00189	-0.00491	-0.00378	-0.00718
				123.7	-455.238	-348.435		123.7	-0.0102	-0.00944	-0.000378	-0.00906	-0.00453	-0.00264	-0.00264	-0.00227
				123.8	-461.155	-356.531		123.8	-0.0102	-0.00604	-0.00415	-0.00566	-0.00453	-0.00264	-0.00415	-0.00302
				123.9	-459.909	-350.303		123.9	-0.00642	-0.00944	-0.00302	-0.00869	-0.00529	-0.00415	-0.0034	-0.0034
				124	-453.993	-348.746		124	-0.00793	-0.0068	-0.000378	-0.00566	-0.00227	-0.00529	-0.00415	-0.00302
				124.1	-453.682	-352.794		124.1	-0.00793	-0.00869	-0.0034	-0.0068	-0.00529	-0.00566	-0.00189	-0.00415
				124.2	-457.73	-349.992		124.2	-0.01095	-0.00491	-0.00151	-0.00982	-0.00378	-0.00151	-0.00642	-0.00302
				124.3	-456.795	-354.351		124.3	-0.00982	-0.00718	-0.00378	-0.00869	-0.00302	-0.00302	-0.00642	-0.00227
				124.4	-459.909	-344.387		124.4	-0.00869	-0.00755	-0.00453	-0.0102	-0.00453	-0.00566	0	-0.00227
				124.5	-457.418	-345.01		124.5	-0.01095	-0.00869	-0.00378	-0.00642	-0.00566	-0.00264	-0.00189	-0.00793
				124.6	-458.041	-348.124		124.6	-0.00869	-0.00906	-0.00566	-0.00604	-0.0034	-0.00227	-0.00529	-0.00604
				124.7	-457.107	-351.237		124.7	-0.0068	-0.00604	-0.0034	-0.00793	-0.00415	-0.00227	-0.00491	-0.00302
				124.8	-462.089	-355.597		124.8	-0.00642	-0.00604	-0.00415	-0.00982	-0.00566	-0.00189	-0.00529	-0.000755
				124.9	-466.76	-347.501		124.9	-0.01171	-0.00642	0	-0.00982	-0.00378	-0.00453	-0.000755	-0.00491
				125	-470.185	-339.405		125	-0.00944	-0.00755	-0.00453	-0.00793	-0.00227	-0.0068	-0.00491	-0.00302
				125.1	-476.724	-337.225		125.1	-0.01133	-0.00944	-0.00415	-0.00831	-0.00642	-0.00264	-0.0068	-0.000378
				125.2	-480.149	-337.848		125.2	-0.00604	-0.00755	-0.00491	-0.00755	-0.00302	-0.0034	-0.0034	-0.00378
				125.3	-476.101	-331.62		125.3	-0.01171	-0.00793	-0.00378	-0.00869	-0.0034	-0.00189	-0.0068	-0.0068
				125.4	-473.299	-328.507		125.4	-0.00793	-0.00831	-0.00415	-0.00906	-0.00529	-0.00151	-0.00302	-0.00604
				125.5	-481.083	-325.704		125.5	-0.00793	-0.00566	-0.00415	-0.00982	-0.00529	-0.00302	-0.00302	0.00151
				125.6	-484.197	-344.076		125.6	-0.01171	-0.00604	-0.00264	-0.00906	-0.00566	-0.00302	-0.00302	-0.00264
				125.7	-477.658	-347.189		125.7	-0.00529	-0.00793	-0.00302	-0.00566	-0.00189	-0.00302	-0.00453	-0.00529
				125.8	-473.299	-341.896		125.8	-0.00755	-0.00906	-0.00227	-0.00906	-0.00755	-0.00189	-0.00642	-0.00491
				125.9	-477.658	-342.519		125.9	-0.01057	-0.0068	-0.00529	-0.00906	-0.0068	-0.00453	-0.00264	-0.00189
				126	-478.903	-339.405		126	-0.00604	-0.00566	-0.000755	-0.00718	-0.0034	-0.00642	-0.00415	-0.00415
				126.1	-477.035	-347.501		126.1	-0.00982	-0.00415	-0.00415	-0.00566	-0.00415	-0.00755	-0.00453	-0.00227
				126.2	-469.873	-364.004		126.2	-0.00906	-0.00869	-0.00566	-0.01171	-0.00642	-0.00453	-0.00566	-0.000755
				126.3	-467.071	-363.693		126.3	-0.00755	-0.00793	-0.00151	-0.00831	-0.00755	-0.00189	-0.00604	-0.00453
				126.4	-478.281	-356.842		126.4	-0.00831	-0.00944	-0.00415	-0.00491	-0.00831	-0.00491	-0.00378	-0.00151
				126.5	-479.838	-361.513		126.5	-0.01171	-0.00642	-0.0068	-0.0102	-0.00604	-0.0034	-0.00302	-0.00189
				126.6	-481.083	-362.447		126.6	-0.00718	-0.00566	-0.00151	-0.01171	-0.00453	0	-0.00491	-0.000378
				126.7	-481.083	-373.034		126.7	-0.00566	-0.00869	-0.00415	-0.01057	-0.00378	-0.000755	-0.00529	-0.000755
				126.8	-481.706	-388.292		126.8	-0.0102	-0.0068	-0.00604	-0.01057	-0.00906	-0.00302	-0.00529	-0.00189
				126.9	-473.61	-376.771		126.9	-0.00831	-0.00755	-0.00189	-0.00642	-0.00566	-0.00378	-0.00529	-0.00378
				127	-466.76	-376.771		127	-0.00566	-0.00869	-0.0034	-0.00944	-0.00604	-0.00302	-0.00378	-0.0034
				127.1	-472.053	-372.411		127.1	-0.00831	-0.00529	-0.00566	-0.01095	-0.0034	-0.00529	-0.00302	-0.00604
				127.2	-467.694	-366.806		127.2	-0.00566	-0.00906	-0.0034	-0.01057	-0.00453	-0.0034	-0.00642	-0.0034
				127.3	-463.957	-373.034		127.3	-0.00869	-0.00491	-0.0034	-0.0068	-0.00529	-0.00604	-0.0068	-0.00453
				127.4	-463.957	-381.441		127.4	-0.00982	-0.00831	-0.00604	-0.00642	-0.00604	-0.00113	-0.00415	0.00189
				127.5	-466.76	-374.28		127.5	-0.00869	-0.00378	-0.00642	-0.00944	-0.00604	-0.00453	-0.00604	-0.00189
				127.6	-466.448	-372.723		127.6	-0.00378	-0.00604	-0.00151	-0.0102	-0.00793	-0.000755	-0.00755	-0.00604
				127.7	-470.185	-379.884		127.7	-0.00831	-0.00755	-0.00264	-0.01095	-0.00491	-0.00227	-0.00491	-0.00151
				127.8	-465.203	-382.064		127.8	-0.01057	-0.00227	-0.00378	-0.00642	-0.00491	-0.00491	-0.00642	-0.00113
				127.9	-465.514	-380.507		127.9	-0.00906	-0.00869	-0.0034	-0.01246	-0.00604	-0.00491	-0.00264	-0.0034
				128	-473.61	-382.375		128	-0.01171	-0.00831	-0.00566	-0.00755	-0.00566	-0.00604	-0.00378	-0.00566
				128.1	-477.035	-376.459		128.1	-0.00944	-0.00642	-0.00491	-0.00755	-0.00264	-0.0034	-0.00604	0.000755
				128.2	-478.592	-372.1		128.2	-0.0068	-0.00566	-0.00378	-0.00793	-0.00793	-0.0034	-0.00302	-0.00302
				128.3	-473.61	-383.621		128.3	-0.00831	-0.00529	-0.00642	-0.00642	-0.00529	-0.00189	-0.00491	-0.00302
				128.4	-472.053	-378.639		128.4	-0.00718	-0.00529	-0.00378	-0.01133	-0.0068	-0.00302	-0.0068	-0.0034
				128.5	-476.412	-374.591		128.5	-0.00793	-0.00604	-0.00453	-0.00906	-0.00604	-0.00642	-0.00491	-0.000755
				128.6	-472.676	-382.375		128.6	-0.00718	-0.00529	-0.00869	-0.01057	-0.00755	-0.00264	-0.00491	-0.00151
				128.7	-473.299	-389.226		128.7	-0.00604	-0.0068	-0.00529	-0.00944	-0.00529	-0.00415	-0.0068	-0.00264
				128.8	-483.574	-391.717		128.8	-0.00491	-0.0034	-0.00264	-0.00944	-0.00869	-0.000755	-0.00491	-0.00491
				128.9	-491.047	-381.13		128.9	-0.01171	-0.00453	-0.00755	-0.01133	-0.00529	-0.00189	-0.00453	-0.00302
				129	-480.772	-375.836		129	-0.00982	-0.00642	-0.00529	-0.00755	-0.00831	-0.00227	-0.00604	-0.00453
				129.1	-481.706	-382.687		129.1	-0.00604	-0.00755	-0.00415	-0.00869	-0.0034	-0.00378	-0.00604	-0.00415
				129.2	-479.838	-378.95		129.2	-0.00906	-0.00529	-0.00529	-0.00906	-0.00831	-0.00453	-0.0034	-0.00302
				129.3	-483.885	-380.507		129.3	-0.00718	-0.00529	-0.00491	-0.00831	-0.00831	-0.00415	-0.00793	-0.00189
				129.4	-478.592	-390.471		129.4	-0.00944	-0.0068	-0.00755	-0.00906	-0.0068	-0.00264	-0.00453	-0.00189
				129.5	-476.101	-389.226		129.5	-0.00831	-0.00604	-0.00604	-0.00755	-0.00793	-0.00302	-0.00642	-0.00378
				129.6	-482.017	-386.112		129.6	-0.00755	-0.00604	-0.00566	-0.00831	-0.00227	-0.00491	-0.00378	-0.00415
				129.7	-478.281	-383.621		129.7	-0.00755	-0.00491	-0.0034	-0.00944	-0.00491	-0.0034	-0.00642	-0.00227
				129.8	-476.412	-385.489		129.8	-0.01171	-0.00453	-0.0034	-0.00982	-0.00755	-0.00302	-0.0068	-0.00189
				129.9	-475.478	-396.076		129.9	-0.0068	-0.00566	-0.00755	-0.00604	-0.0034	-0.00415	-0.00302	-0.0034
				130	-472.987	-394.831		130	-0.00793	-0.00529	-0.00642	-0.00642	-0.00642	-0.00793	-0.00491	-0.00189
				130.1	-467.694	-391.405		130.1	-0.00982	-0.00642	-0.00566	-0.00566	-0.00718	-0.0034	-0.0068	-0.00151
				130.2	-473.921	-372.723		130.2	-0.01095	-0.00529	-0.00491	-0.00642	-0.00378	-0.00453	-0.00491	-0.00378
				130.3	-477.346	-372.723		130.3	-0.0068	-0.00566	-0.00529	-0.00642	-0.00944	-0.00227	-0.00604	-0.00453
				130.4	-471.119	-380.196		130.4	-0.00453	-0.00642	-0.00378	-0.01095	-0.00793	-0.0034	-0.00642	-0.000378
				130.5	-468.005	-378.016		130.5	-0.01246	-0.00453	-0.00453	-0.0068	-0.00982	-0.00529	-0.00264	-0.00189
				130.6	-465.203	-378.327		130.6	-0.00869	-0.00566	-0.00491	-0.00944	-0.00755	-0.00566	-0.00566	-0.00227
				130.7	-461.777	-374.28		130.7	-0.01397	-0.00642	-0.00755	-0.00906	-0.0068	-0.00566	-0.00491	-0.00415
				130.8	-461.466	-375.836		130.8	-0.01208	-0.00227	-0.00604	-0.00755	-0.00906	-0.00491	-0.00604	-0.00302
				130.9	-469.251	-376.459		130.9	-0.01133	-0.00529	-0.00529	-0.00982	-0.00642	-0.00415	-0.00491	-0.0034
				131	-468.005	-373.034		131	-0.0068	-0.00302	-0.00604	-0.00529	-0.00793	-0.00566	-0.0068	-0.00604
				131.1	-461.155	-370.854		131.1	-0.00755	-0.00529	-0.00529	-0.00529	-0.00793	-0.00227	-0.00529	-0.00415
				131.2	-463.646	-369.297		131.2	-0.00906	-0.00566	-0.00642	-0.00793	-0.00604	-0.000755	-0.00604	-0.00151
				131.3	-461.155	-365.249		131.3	-0.0102	-0.00566	-0.00755	-0.00529	-0.00453	-0.00415	-0.00264	-0.00264
				131.4	-456.173	-368.363		131.4	-0.01435	-0.00566	-0.0068	-0.00944	-0.00529	-0.00378	-0.00415	-0.00302
				131.5	-451.191	-370.854		131.5	-0.01435	-0.00491	-0.00529	-0.0068	-0.00642	-0.00604	-0.00453	-0.00151
				131.6	-450.256	-366.495		131.6	-0.01057	-0.00227	-0.00642	-0.00755	-0.00491	-0.00566	-0.00755	-0.00604
				131.7	-451.502	-364.315		131.7	-0.00793	-0.00453	-0.0068	-0.00415	-0.00604	-0.0034	-0.00529	-0.00151
				131.8	-455.861	-363.381		131.8	-0.01171	-0.0068	-0.00529	-0.00869	-0.00906	-0.00566	-0.0034	-0.00529
				131.9	-451.502	-370.232		131.9	-0.00869	-0.00378	-0.00604	-0.00982	-0.0068	-0.0034	-0.00453	-0.00566
				132	-444.963	-375.525		132	-0.00793	-0.00415	-0.00529	-0.00415	-0.00604	-0.00302	-0.00491	-0.00453
				132.1	-440.292	-375.525		132.1	-0.00793	-0.00491	-0.00604	-0.0102	-0.00529	-0.00566	-0.0034	-0.0034
				132.2	-430.639	-380.507		132.2	-0.00831	-0.0102	-0.00869	-0.00491	-0.00491	-0.00604	-0.00529	-0.00566
				132.3	-439.047	-379.884		132.3	-0.00906	-0.00415	-0.00604	-0.0034	-0.00604	-0.00491	-0.00566	-0.00453
				132.4	-447.454	-373.034		132.4	-0.00642	-0.00453	-0.00642	-0.00906	-0.00604	-0.00302	-0.00529	-0.00453
				132.5	-445.897	-377.705		132.5	-0.01284	-0.00566	-0.00642	-0.0068	-0.00604	-0.00415	-0.00604	-0.00378
				132.6	-457.418	-366.495		132.6	-0.0102	-0.0034	-0.0034	-0.00944	-0.00793	-0.00529	-0.00415	-0.0034
				132.7	-459.909	-356.219		132.7	-0.01322	-0.00491	-0.00415	-0.00415	-0.0068	-0.0068	-0.00378	-0.00415
				132.8	-449.945	-358.088		132.8	-0.0102	-0.00378	-0.0034	-0.00906	-0.00944	-0.0068	-0.00529	-0.00415
				132.9	-444.652	-358.71		132.9	-0.00869	-0.00453	-0.00227	-0.00831	-0.00869	-0.00453	-0.00491	-0.00453
				133	-446.52	-356.531		133	-0.00718	-0.00453	-0.00755	-0.00566	-0.00491	-0.00453	-0.00642	-0.00642
				133.1	-448.077	-357.776		133.1	-0.00831	-0.00604	-0.0102	-0.00642	-0.00604	-0.00453	-0.00529	-0.00453
				133.2	-443.406	-355.908		133.2	-0.00755	-0.00793	-0.00453	-0.00604	-0.00642	-0.00302	-0.00491	-0.00227
				133.3	-441.226	-349.992		133.3	-0.00982	0	-0.00642	-0.00793	-0.00227	-0.00906	-0.00415	-0.00642
				133.4	-449.322	-345.01		133.4	-0.01133	-0.00491	-0.00793	-0.00642	-0.00453	-0.0068	-0.00264	-0.00529
				133.5	-453.682	-349.058		133.5	-0.00566	-0.00831	-0.00415	-0.00944	-0.00755	-0.00906	-0.00529	-0.00378
				133.6	-457.107	-352.171		133.6	-0.00944	-0.00415	-0.00755	-0.00302	-0.00793	-0.00491	-0.00453	-0.00566
				133.7	-462.089	-353.106		133.7	-0.00906	-0.00264	-0.00566	-0.00642	-0.00529	-0.0034	-0.00415	-0.00415
				133.8	-460.532	-356.531		133.8	-0.01133	-0.00642	-0.0068	-0.00604	-0.00604	-0.00642	-0.00491	-0.00453
				133.9	-460.843	-354.351		133.9	-0.00944	-0.00491	-0.00906	-0.0068	-0.00755	-0.00264	-0.00415	-0.00264
				134	-464.58	-342.207		134	-0.00869	-0.00529	-0.0102	-0.0068	-0.00604	-0.00906	-0.00491	-0.00529
				134.1	-469.873	-345.01		134.1	-0.0068	-0.00415	-0.00491	-0.00453	-0.00529	-0.00302	-0.00604	-0.00604
				134.2	-472.676	-345.321		134.2	-0.00793	-0.00566	-0.00869	-0.00642	-0.0068	-0.00566	-0.00378	-0.00604
				134.3	-469.251	-342.83		134.3	-0.00944	-0.00264	-0.00604	-0.00566	-0.00604	-0.00566	-0.00453	-0.00415
				134.4	-468.316	-342.83		134.4	-0.01095	-0.00529	-0.00604	-0.00491	-0.00453	-0.00491	-0.00189	0
				134.5	-469.562	-340.339		134.5	-0.00642	-0.00189	-0.0034	-0.00718	-0.00604	-0.00906	-0.00378	-0.00415
				134.6	-477.346	-340.65		134.6	-0.0102	-0.00378	-0.00755	-0.00566	-0.0068	-0.00491	-0.00453	-0.00529
				134.7	-477.658	-335.98		134.7	-0.01057	-0.00642	-0.00718	-0.00642	-0.00793	-0.00415	-0.00415	-0.00264
				134.8	-469.873	-340.962		134.8	-0.01171	-0.00944	-0.00755	-0.00718	-0.00302	-0.00491	-0.00302	-0.00566
				134.9	-469.251	-341.896		134.9	-0.00831	-0.00491	-0.00529	-0.00415	-0.0068	-0.00566	-0.00264	-0.00642
				135	-468.316	-338.782		135	-0.00982	-0.00529	-0.00831	-0.00529	-0.00529	-0.00793	-0.00378	-0.0068
				135.1	-462.089	-340.962		135.1	-0.00982	-0.00453	-0.00566	-0.00906	-0.00529	-0.00415	-0.00604	-0.00227
				135.2	-467.071	-351.237		135.2	-0.00944	-0.00718	-0.00906	-0.00453	-0.00415	-0.00566	-0.00491	-0.00415
				135.3	-466.137	-350.926		135.3	-0.01133	-0.00302	-0.00491	-0.00227	-0.00302	-0.00529	-0.00302	-0.00604
				135.4	-464.891	-343.141		135.4	-0.00944	-0.00604	-0.00491	-0.00604	-0.00529	-0.0068	-0.00264	-0.00491
				135.5	-466.76	-332.555		135.5	-0.01133	-0.00302	-0.0068	-0.00302	-0.00378	-0.00869	-0.00378	-0.00415
				135.6	-458.352	-326.016		135.6	-0.01057	-0.00604	-0.00566	-0.00529	-0.00642	-0.00604	-0.00264	-0.00869
				135.7	-457.107	-326.95		135.7	-0.00944	-0.00642	-0.00529	-0.00982	-0.00642	-0.00755	-0.00302	-0.00642
				135.8	-457.73	-331.932		135.8	-0.01322	-0.00415	-0.00869	-0.00831	-0.00453	-0.00529	-0.00415	-0.00453
				135.9	-453.993	-338.782		135.9	-0.0068	-0.00604	-0.00869	-0.00302	-0.00529	-0.00529	-0.00378	-0.00718
				136	-453.059	-354.974		136	-0.0102	-0.00491	-0.00642	-0.00982	-0.00491	-0.00642	-0.00415	-0.0068
				136.1	-464.891	-360.579		136.1	-0.01057	-0.00415	-0.00869	-0.00604	-0.00642	-0.00189	-0.00189	-0.00415
				136.2	-461.155	-360.267		136.2	-0.00869	-0.00831	-0.00755	-0.000755	-0.0034	-0.00529	-0.0034	-0.00566
				136.3	-454.927	-356.531		136.3	-0.0102	-0.00566	-0.00529	-0.00453	-0.00491	-0.00604	-0.00302	-0.00529
				136.4	-447.454	-350.615		136.4	-0.01057	-0.00302	-0.00529	-0.00453	-0.00415	-0.00831	-0.00302	-0.00264
				136.5	-447.143	-347.189		136.5	-0.01057	-0.00415	-0.00604	-0.00378	-0.00755	-0.00793	-0.00151	-0.00642
				136.6	-444.652	-352.483		136.6	-0.01133	-0.00491	-0.00718	-0.00491	-0.00529	-0.00831	-0.00264	-0.0068
				136.7	-443.406	-355.597		136.7	-0.01284	-0.00566	-0.00302	-0.00529	-0.00604	-0.00755	-0.00264	-0.0034
				136.8	-439.047	-349.369		136.8	-0.01171	-0.00566	-0.00453	-0.00453	-0.00604	-0.00755	-0.00491	-0.00302
				136.9	-439.981	-348.435		136.9	-0.00906	-0.00604	-0.00604	-0.00755	-0.000755	-0.0034	-0.00378	-0.00189
				137	-440.292	-350.303		137	-0.00831	-0.00944	-0.00453	-0.00642	-0.00302	-0.00566	-0.000378	-0.00642
				137.1	-446.831	-335.357		137.1	-0.00906	-0.00831	-0.00415	-0.00302	-0.00642	-0.00604	-0.00302	-0.00378
				137.2	-453.682	-331.62		137.2	-0.0102	-0.0068	-0.0034	-0.00453	-0.0068	-0.00831	-0.00264	-0.00793
				137.3	-460.221	-330.686		137.3	-0.01284	-0.00453	-0.00906	-0.00491	-0.00378	-0.00491	-0.00189	-0.00302
				137.4	-462.712	-329.129		137.4	-0.01057	-0.00529	-0.00642	-0.00378	-0.00302	-0.00604	-0.000755	-0.00755
				137.5	-461.155	-340.65		137.5	-0.01397	-0.00491	-0.00755	-0.00453	-0.00453	-0.00453	-0.00264	-0.00906
				137.6	-459.909	-352.483		137.6	-0.00906	-0.00566	-0.00491	-0.00718	-0.00415	-0.00566	-0.00264	-0.00415
				137.7	-449.011	-348.435		137.7	-0.0068	-0.00718	-0.00642	-0.00604	-0.00151	-0.00566	-0.00302	-0.00566
				137.8	-437.49	-343.453		137.8	-0.01133	-0.00642	-0.00642	-0.00453	-0.0068	-0.00755	-0.00378	-0.00604
				137.9	-439.669	-337.225		137.9	-0.00755	-0.00378	-0.0034	-0.00378	-0.00189	-0.00755	-0.00151	-0.00264
				138	-443.406	-334.423		138	-0.0068	-0.00944	-0.0034	-0.00566	-0.00566	-0.00453	-0.00415	-0.00604
				138.1	-446.831	-342.83		138.1	-0.01057	-0.00491	-0.00491	-0.00491	-0.00227	-0.00378	-0.0034	-0.0068
				138.2	-446.831	-349.369		138.2	-0.01057	-0.00642	-0.00302	-0.00453	-0.00566	-0.00415	-0.00415	-0.00604
				138.3	-447.454	-350.303		138.3	-0.01397	-0.00831	-0.00491	-0.00227	-0.00415	-0.00944	-0.00264	-0.00831
				138.4	-448.077	-358.088		138.4	-0.01095	-0.0068	-0.00378	-0.0068	-0.00264	-0.00869	-0.000378	-0.00566
				138.5	-447.765	-361.202		138.5	-0.00755	-0.00604	-0.0068	-0.00529	-0.00529	-0.00529	-0.00227	-0.00604
				138.6	-456.173	-358.399		138.6	-0.0102	-0.00604	-0.00529	-0.00378	-0.00264	-0.00604	-0.00227	-0.00642
				138.7	-456.795	-355.285		138.7	-0.0102	-0.0034	-0.00491	-0.00529	-0.00453	-0.00604	-0.00227	-0.00264
				138.8	-453.059	-357.465		138.8	-0.01095	-0.00642	-0.00491	-0.00566	-0.00378	-0.00982	0.00189	-0.00529
				138.9	-444.029	-358.71		138.9	-0.01246	-0.0068	-0.00529	-0.00453	-0.000378	-0.00529	-0.00302	-0.00642
				139	-438.735	-357.776		139	-0.01095	-0.00944	-0.0034	-0.00869	-0.00302	-0.00491	-0.00415	-0.00529
				139.1	-439.981	-360.267		139.1	-0.00906	-0.00604	-0.00566	-0.00566	-0.0034	-0.00529	-0.00264	-0.0068
				139.2	-438.424	-361.824		139.2	-0.01548	-0.00604	-0.00415	-0.00755	-0.0034	-0.00982	-0.000755	-0.00642
				139.3	-436.244	-364.004		139.3	-0.00642	-0.00831	-0.00491	-0.00604	-0.00264	-0.0068	-0.00302	-0.0034
				139.4	-433.13	-373.034		139.4	-0.01246	-0.00642	-0.00642	-0.00491	-0.00189	-0.00755	-0.00189	-0.00604
				139.5	-436.244	-373.345		139.5	-0.01095	-0.00831	-0.00151	-0.00831	-0.00378	-0.00604	-0.00264	-0.00604
				139.6	-442.472	-371.166		139.6	-0.00906	-0.00453	-0.00378	-0.00491	-0.00491	-0.00302	-0.00227	-0.00566
				139.7	-448.699	-365.561		139.7	-0.00642	-0.00982	-0.0068	-0.00529	-0.00642	-0.00529	-0.00189	-0.00604
				139.8	-461.777	-358.399		139.8	-0.00982	-0.00566	-0.00264	-0.00793	-0.00415	-0.00378	-0.00189	-0.0034
				139.9	-467.071	-360.579		139.9	-0.01057	-0.00793	-0.0034	-0.00793	-0.00415	-0.00642	-0.00151	-0.0068
				140	-457.418	-355.908		140	-0.00869	-0.00755	-0.00453	-0.00869	-0.00227	-0.00566	-0.00453	-0.00869
				140.1	-454.616	-348.435		140.1	-0.01057	-0.00906	-0.00604	-0.00566	-0.00227	-0.00642	-0.00415	-0.0068
				140.2	-452.747	-340.65		140.2	-0.01246	-0.00642	-0.00718	-0.00831	-0.00227	-0.00718	-0.00151	-0.00453
				140.3	-444.029	-345.321		140.3	-0.01171	-0.00944	-0.00604	-0.00566	-0.000755	-0.00566	-0.00264	-0.00566
				140.4	-437.801	-346.878		140.4	-0.01208	-0.00982	-0.00529	-0.00604	-0.00151	-0.00604	-0.00264	-0.00793
				140.5	-434.687	-352.171		140.5	-0.0136	-0.0068	-0.00264	-0.00642	-0.00302	-0.00453	-0.0034	-0.00453
				140.6	-438.424	-349.992		140.6	-0.01548	-0.00529	-0.00453	-0.00793	-0.0034	-0.00604	-0.00189	-0.00491
				140.7	-442.783	-347.812		140.7	-0.01133	-0.00793	-0.00378	-0.00415	-0.00227	-0.00378	-0.00227	-0.00264
				140.8	-441.538	-350.303		140.8	-0.01775	-0.00642	-0.000378	-0.00718	-0.00302	-0.00529	-0.00453	-0.00793
				140.9	-436.556	-342.83		140.9	-0.01246	-0.00755	-0.00491	-0.00604	-0.00529	-0.00227	-0.00227	-0.00642
				141	-435.933	-335.357		141	-0.0136	-0.00869	-0.0034	-0.00491	-0.000378	-0.00529	-0.00189	-0.00529
				141.1	-437.801	-349.369		141.1	-0.01208	-0.0102	-0.00529	-0.00869	-0.00151	-0.00453	-0.00227	-0.00189
				141.2	-443.717	-360.579		141.2	-0.00944	-0.00529	-0.00415	-0.0068	-0.0034	-0.00642	-0.00189	-0.00793
				141.3	-441.538	-364.627		141.3	-0.01133	-0.00529	-0.00604	-0.00755	-0.0034	-0.00453	-0.00415	-0.00642
				141.4	-440.292	-351.86		141.4	-0.00982	-0.00944	-0.00302	-0.00982	-0.00604	-0.00415	-0.000755	-0.00264
				141.5	-432.508	-345.01		141.5	-0.0102	-0.0068	-0.00227	-0.00831	-0.00302	-0.00302	-0.00151	-0.00642
				141.6	-434.065	-346.567		141.6	-0.00982	-0.00529	-0.00264	-0.00906	-0.00302	-0.00566	-0.00604	-0.00453
				141.7	-434.687	-351.237		141.7	-0.01435	-0.0102	-0.00264	-0.00453	-0.00415	-0.0068	-0.00264	-0.0034
				141.8	-438.735	-350.303		141.8	-0.01624	-0.00755	-0.00302	-0.00831	-0.00302	-0.00642	-0.00113	-0.00529
				141.9	-438.735	-345.633		141.9	-0.01133	-0.00869	-0.00491	-0.00906	-0.000755	-0.00302	-0.00264	-0.0034
				142	-438.735	-348.124		142	-0.0102	-0.00869	-0.00227	-0.0068	-0.0034	-0.00453	-0.00453	-0.00529
				142.1	-433.442	-349.68		142.1	-0.01171	-0.00982	-0.0034	-0.00755	-0.00264	-0.0068	-0.00227	-0.00491
				142.2	-433.13	-350.926		142.2	-0.00869	-0.00755	-0.00415	-0.00869	-0.00189	-0.00604	-0.00264	-0.00415
				142.3	-433.753	-346.567		142.3	-0.00755	-0.00755	-0.00227	-0.00793	-0.00415	-0.00491	-0.00302	-0.00529
				142.4	-435.31	-337.848		142.4	-0.00869	-0.00755	-0.00453	-0.00755	-0.0034	-0.00491	-0.00378	-0.00264
				142.5	-439.669	-345.633		142.5	-0.00944	-0.00944	-0.00302	-0.00642	-0.00378	-0.00378	-0.00151	-0.00491
				142.6	-437.178	-342.519		142.6	-0.01133	-0.01133	-0.00869	-0.00869	-0.00378	-0.00415	-0.00415	-0.00453
				142.7	-436.867	-338.471		142.7	-0.01171	-0.0068	-0.00642	-0.00642	-0.0034	-0.00566	-0.00529	-0.00415
				142.8	-442.783	-343.453		142.8	-0.01171	-0.00944	-0.00453	-0.00642	-0.000378	-0.00378	-0.00302	-0.00491
				142.9	-442.472	-347.812		142.9	-0.01284	-0.00642	-0.00378	-0.00755	-0.00189	-0.00529	-0.00302	-0.00453
				143	-447.143	-343.141		143	-0.01208	-0.00906	-0.00415	-0.00982	-0.00604	-0.00453	-0.00453	-0.00491
				143.1	-455.55	-338.471		143.1	-0.01586	-0.00604	-0.00378	-0.00378	-0.00529	-0.00642	-0.00415	-0.00415
				143.2	-461.777	-343.764		143.2	-0.01171	-0.00604	-0.00227	-0.0068	-0.000755	-0.00755	-0.00264	-0.00453
				143.3	-455.861	-348.746		143.3	-0.01586	-0.00869	-0.0034	-0.00982	-0.00718	-0.0034	-0.00529	-0.00302
				143.4	-455.861	-342.207		143.4	-0.01171	-0.00642	-0.0034	-0.00982	-0.00642	-0.0068	-0.0034	-0.00378
				143.5	-453.059	-340.65		143.5	-0.0136	-0.00642	-0.00302	-0.00831	-0.00302	-0.00566	-0.000755	-0.00566
				143.6	-452.436	-342.519		143.6	-0.01322	-0.00831	-0.00264	-0.0068	-0.00415	-0.0034	-0.00529	-0.00453
				143.7	-451.191	-344.076		143.7	-0.01548	-0.0068	-0.00604	-0.01208	-0.00378	-0.00264	-0.00566	-0.00227
				143.8	-440.915	-348.435		143.8	-0.01133	-0.01095	-0.00264	-0.00831	-0.00151	-0.00529	-0.00378	-0.0034
				143.9	-437.49	-354.351		143.9	-0.01397	-0.00982	-0.00415	-0.0068	-0.0034	-0.00302	-0.0034	-0.00453
				144	-444.029	-361.513		144	-0.01057	-0.00415	-0.000755	-0.00906	-0.00378	-0.00189	-0.00302	-0.00566
				144.1	-439.981	-361.513		144.1	-0.01284	-0.00755	-0.00415	-0.0102	-0.00642	-0.00415	-0.0034	-0.00415
				144.2	-442.783	-354.351		144.2	-0.01397	-0.00982	-0.00113	-0.01133	-0.00415	-0.00378	-0.00189	-0.00264
				144.3	-444.029	-353.106		144.3	-0.01095	-0.01095	-0.000378	-0.00906	-0.00264	-0.00642	-0.00491	-0.00491
				144.4	-439.669	-348.124		144.4	-0.01284	-0.00491	-0.00529	-0.00718	-0.00378	-0.000755	-0.0034	-0.00189
				144.5	-439.669	-343.453		144.5	-0.01435	-0.00604	-0.00453	-0.00793	-0.00453	-0.00227	-0.00378	-0.00378
				144.6	-436.867	-342.207		144.6	-0.01057	-0.00869	-0.00529	-0.00906	-0.0034	-0.00415	-0.00264	-0.00264
				144.7	-435.31	-334.111		144.7	-0.00982	-0.00604	-0.00566	-0.00869	-0.00415	-0.00378	-0.00189	-0.00264
				144.8	-434.999	-334.111		144.8	-0.00944	-0.00491	-0.0034	-0.00793	-0.00453	-0.00227	-0.0034	-0.00378
				144.9	-432.508	-329.441		144.9	-0.01057	-0.0068	-0.00415	-0.00944	-0.00415	-0.00302	-0.00529	-0.00227
				145	-439.981	-337.537		145	-0.00869	-0.00566	-0.00264	-0.01133	-0.00151	-0.00415	-0.0034	-0.00415
				145.1	-444.029	-343.141		145.1	-0.01095	-0.00642	-0.00227	-0.0068	-0.00869	-0.00529	-0.00491	-0.00529
				145.2	-439.047	-341.896		145.2	-0.0068	-0.00869	-0.00302	-0.0102	-0.0034	-0.00378	-0.00491	-0.00264
				145.3	-439.358	-336.914		145.3	-0.00604	-0.00869	-0.00189	-0.00869	-0.00415	-0.00453	-0.00566	-0.00378
				145.4	-443.406	-325.081		145.4	-0.00982	-0.0068	-0.00529	-0.00793	-0.00415	-0.00264	-0.00264	-0.00227
				145.5	-447.765	-321.968		145.5	-0.00906	-0.00793	-0.00151	-0.01133	-0.00642	-0.00227	-0.00415	-0.00302
				145.6	-455.861	-328.195		145.6	-0.00944	-0.00982	-0.00566	-0.00906	-0.0034	-0.00189	-0.00415	-0.00453
				145.7	-460.221	-322.279		145.7	-0.01133	-0.00604	-0.00302	-0.00831	-0.00378	-0.00189	-0.00491	-0.00529
				145.8	-453.37	-317.92		145.8	-0.00793	-0.00529	-0.00227	-0.00944	-0.00491	-0.00453	-0.0034	-0.00302
				145.9	-453.993	-322.59		145.9	-0.00869	-0.00755	-0.00415	-0.00869	-0.00491	-0.00566	-0.00529	-0.00415
				146	-450.256	-331.932		146	-0.00642	-0.01095	-0.00227	-0.00982	-0.00604	-0.00566	-0.00302	-0.00378
				146.1	-450.879	-339.405		146.1	-0.00566	-0.0068	-0.00113	-0.00793	-0.00491	-0.00491	-0.00529	0
				146.2	-449.634	-338.159		146.2	-0.01057	-0.00453	-0.0068	-0.0068	-0.00491	-0.00415	-0.00491	-0.00264
				146.3	-444.029	-337.225		146.3	-0.00755	-0.00453	-0.00529	-0.0068	-0.00529	-0.00227	-0.00378	-0.00302
				146.4	-437.801	-348.435		146.4	-0.01171	-0.00982	-0.00264	-0.01246	-0.00302	-0.00151	-0.00415	-0.00415
				146.5	-433.13	-354.351		146.5	-0.00604	-0.00755	-0.00755	-0.00869	-0.00491	-0.00227	-0.00378	-0.00378
				146.6	-428.46	-356.531		146.6	-0.00566	-0.00755	-0.00378	-0.00982	-0.0068	-0.00453	-0.00264	0.000378
				146.7	-429.394	-359.956		146.7	-0.00944	-0.00906	-0.00113	-0.00906	-0.00604	-0.00227	-0.00491	-0.00453
				146.8	-444.029	-353.106		146.8	-0.0068	-0.00604	-0.00642	-0.00831	-0.00378	-0.00227	-0.00453	-0.0034
				146.9	-443.717	-350.926		146.9	-0.0068	-0.00415	-0.000755	-0.01171	-0.00604	-0.00302	-0.00415	-0.00415
				147	-435.31	-348.124		147	-0.00906	-0.00755	-0.00453	-0.00718	-0.0034	-0.00529	-0.00566	-0.00415
				147.1	-436.556	-356.531		147.1	-0.00831	-0.0068	-0.00604	-0.00642	-0.00415	-0.00264	-0.00491	-0.00566
				147.2	-433.753	-346.878		147.2	-0.00793	-0.00529	-0.00566	-0.01322	-0.00642	-0.00415	-0.00378	-0.00453
				147.3	-432.819	-340.65		147.3	-0.00604	-0.0068	-0.00491	-0.01284	-0.00642	-0.00378	-0.00755	0.000378
				147.4	-433.13	-340.028		147.4	-0.00718	-0.00718	-0.00453	-0.01057	-0.00604	-0.00113	-0.00491	-0.00264
				147.5	-431.885	-348.435		147.5	-0.00642	-0.0068	-0.00378	-0.00793	-0.00831	-0.00529	-0.00264	-0.000378
				147.6	-432.819	-345.01		147.6	-0.00831	-0.00642	-0.0034	-0.00869	-0.00529	-0.00264	-0.00642	-0.00302
				147.7	-436.244	-339.094		147.7	-0.00869	-0.00529	-0.00378	-0.01057	-0.00718	-0.00491	-0.00264	-0.0034
				147.8	-446.52	-349.68		147.8	-0.00755	-0.00604	-0.00264	-0.00982	-0.0068	-0.00491	-0.00529	-0.000755
				147.9	-453.059	-354.04		147.9	-0.00906	-0.00529	-0.00264	-0.00831	-0.00529	-0.00302	-0.00302	-0.00264
				148	-448.077	-351.237		148	-0.0102	-0.00491	-0.00491	-0.00944	-0.00415	-0.00453	-0.00189	-0.000755
				148.1	-452.436	-348.746		148.1	-0.00944	-0.00944	-0.00491	-0.01095	-0.00566	-0.00566	-0.0068	-0.00453
				148.2	-447.765	-345.321		148.2	-0.00906	-0.00642	-0.0068	-0.00793	-0.00529	-0.00415	-0.00302	-0.00227
				148.3	-443.095	-340.339		148.3	-0.0102	-0.00566	-0.00491	-0.00755	-0.00831	-0.00529	-0.00529	-0.00151
				148.4	-445.897	-324.77		148.4	-0.00982	-0.00944	-0.00415	-0.01246	-0.0068	-0.000755	-0.00604	-0.00113
				148.5	-447.454	-328.818		148.5	-0.00906	-0.00718	-0.0068	-0.01133	-0.00642	-0.00227	-0.00604	-0.00227
				148.6	-441.538	-334.423		148.6	-0.00869	-0.0068	-0.00453	-0.00566	-0.00642	-0.00453	-0.00378	-0.0034
				148.7	-439.981	-332.555		148.7	-0.00755	-0.00755	-0.00453	-0.00718	-0.00869	-0.00529	-0.00566	-0.00151
				148.8	-441.226	-333.8		148.8	-0.00642	-0.00566	-0.00529	-0.01133	-0.00793	-0.00415	-0.00755	-0.00491
				148.9	-442.472	-338.159		148.9	-0.00869	-0.00415	-0.00604	-0.00642	-0.00869	-0.00227	-0.00718	-0.00415
				149	-440.915	-341.273		149	-0.00604	-0.0034	-0.00302	-0.00982	-0.00642	-0.00415	-0.00378	-0.000755
				149.1	-448.077	-345.01		149.1	-0.00869	-0.00491	-0.00642	-0.00906	-0.00793	-0.00227	-0.00264	-0.00378
				149.2	-446.52	-354.04		149.2	-0.00491	-0.00793	-0.00491	-0.0102	-0.00302	-0.00529	-0.00491	-0.00189
				149.3	-453.682	-355.285		149.3	-0.00491	-0.00718	-0.00378	-0.0068	-0.00793	-0.00189	-0.00453	0
				149.4	-454.927	-362.447		149.4	-0.00982	-0.00491	-0.00831	-0.00982	-0.00982	-0.0034	-0.00491	-0.0068
				149.5	-447.765	-358.399		149.5	-0.00604	-0.00491	-0.00604	-0.00869	-0.00566	-0.00491	-0.00906	-0.00189
				149.6	-448.699	-350.303		149.6	-0.00869	-0.0034	-0.0034	-0.00869	-0.00264	-0.00302	-0.00642	-0.00302
				149.7	-453.059	-341.585		149.7	-0.00944	-0.01057	-0.00566	-0.00906	-0.00642	-0.00566	-0.00604	-0.00302
				149.8	-465.203	-348.746		149.8	-0.00604	-0.00378	-0.00378	-0.00906	-0.00529	-0.00415	-0.00302	-0.00189
				149.9	-475.167	-339.716		149.9	-0.00982	-0.00566	-0.00755	-0.00642	-0.00453	-0.00529	-0.00264	-0.00151
				150	-467.382	-334.111		150	-0.00755	-0.00453	-0.00566	-0.0102	-0.0068	-0.00378	-0.00793	-0.00302
				150.1	-460.221	-333.8		150.1	-0.00869	-0.00566	-0.00378	-0.00906	-0.00906	-0.00491	-0.00604	-0.0034
				150.2	-462.4	-333.489		150.2	-0.00869	-0.00718	-0.00604	-0.00415	-0.00755	-0.00529	-0.00302	-0.00264
				150.3	-461.777	-329.129		150.3	-0.00944	-0.00453	-0.00491	-0.00944	-0.00718	-0.00491	-0.00453	-0.00378
				150.4	-457.107	-332.555		150.4	-0.00755	-0.00453	-0.00491	-0.00793	-0.00642	-0.00227	-0.0068	-0.00227
				150.5	-461.466	-343.453		150.5	-0.00906	-0.00378	-0.00755	-0.00906	-0.00869	-0.00491	-0.0068	-0.00227
				150.6	-461.466	-342.519		150.6	-0.00604	-0.00491	-0.0068	-0.00944	-0.00604	-0.00529	-0.0068	-0.00604
				150.7	-458.664	-347.189		150.7	-0.00604	-0.00566	-0.00793	-0.00566	-0.00755	-0.00415	-0.00491	0.00151
				150.8	-454.616	-344.698		150.8	-0.00906	-0.00264	-0.00529	-0.00944	-0.0068	-0.00604	-0.00491	-0.00378
				150.9	-447.454	-348.124		150.9	-0.00869	-0.00529	-0.00831	-0.00869	-0.00906	-0.00227	-0.00264	-0.000755
				151	-444.963	-335.98		151	-0.00491	-0.00415	-0.00227	-0.00793	-0.00831	-0.00415	-0.0034	-0.00415
				151.1	-447.143	-335.357		151.1	-0.00642	-0.00415	-0.00491	-0.0068	-0.01057	-0.00227	-0.00491	-0.00415
				151.2	-442.16	-332.555		151.2	-0.00718	-0.00944	-0.00755	-0.00906	-0.00793	-0.00302	-0.00529	-0.00415
				151.3	-443.717	-330.686		151.3	-0.00755	-0.00529	-0.0068	-0.00944	-0.00718	-0.00566	-0.00529	-0.00453
				151.4	-446.52	-330.998		151.4	-0.00869	-0.00566	-0.00869	-0.0102	-0.00491	-0.00491	-0.00227	-0.00151
				151.5	-453.682	-328.507		151.5	-0.00793	-0.00453	-0.00604	-0.00566	-0.00264	-0.00264	-0.0068	-0.00227
				151.6	-459.909	-331.932		151.6	-0.00869	-0.00491	-0.00566	-0.0068	-0.00415	-0.00642	-0.00491	-0.00415
				151.7	-458.664	-336.602		151.7	-0.00944	-0.00453	-0.00906	-0.00718	-0.00718	-0.00718	-0.00227	-0.00264
				151.8	-452.125	-343.141		151.8	-0.00831	-0.0034	-0.00869	-0.00755	-0.0102	-0.0034	-0.00491	-0.00378
				151.9	-456.484	-345.944		151.9	-0.00566	-0.00491	-0.00642	-0.00793	-0.0068	-0.00415	-0.00378	-0.00415
				152	-454.616	-349.058		152	-0.00604	-0.00718	-0.00604	-0.0034	-0.00453	-0.000378	-0.00642	-0.00453
				152.1	-455.238	-341.896		152.1	-0.0102	-0.00378	-0.00566	-0.00869	-0.00642	-0.00566	-0.00453	-0.00264
				152.2	-444.029	-335.668		152.2	-0.01057	-0.00227	-0.00718	-0.00415	-0.00566	-0.00755	-0.00604	-0.00529
				152.3	-445.897	-341.896		152.3	-0.00604	-0.00227	-0.00831	-0.00642	-0.00906	-0.00378	-0.00566	-0.00189
				152.4	-445.897	-338.471		152.4	-0.00718	-0.0068	-0.01284	-0.01095	-0.00566	-0.0034	-0.00378	-0.00453
				152.5	-446.52	-346.567		152.5	-0.00982	-0.00415	-0.0034	-0.00453	-0.00529	-0.00491	-0.00302	-0.00378
				152.6	-453.993	-341.896		152.6	-0.00982	-0.00453	-0.00491	-0.00566	-0.00604	-0.00529	-0.00604	-0.00491
				152.7	-452.125	-331.932		152.7	-0.00642	-0.0034	-0.00755	-0.00718	-0.00831	-0.00264	-0.00453	-0.00151
				152.8	-445.274	-332.866		152.8	-0.00793	-0.00264	-0.00415	-0.00642	-0.0068	-0.00453	-0.00378	-0.00453
				152.9	-442.783	-335.357		152.9	-0.00869	-0.00869	-0.00604	-0.00831	-0.0068	-0.00378	-0.0068	-0.00491
				153	-433.753	-340.962		153	-0.00755	-0.00415	-0.00642	-0.00415	-0.00718	-0.00906	-0.00415	-0.00491
				153.1	-424.412	-349.369		153.1	-0.00755	-0.00453	-0.00566	-0.0068	-0.00529	-0.0068	-0.00378	-0.00415
				153.2	-426.28	-351.237		153.2	-0.0068	-0.00604	-0.00831	-0.00831	-0.00378	-0.00378	-0.00415	-0.00415
				153.3	-428.46	-345.633		153.3	-0.0102	-0.00453	-0.0068	-0.00831	-0.00604	-0.00529	-0.00453	-0.00151
				153.4	-431.885	-344.698		153.4	-0.00718	-0.00378	-0.00944	-0.00944	-0.00491	-0.00642	-0.00453	-0.00529
				153.5	-433.753	-347.189		153.5	-0.01095	-0.00529	-0.00906	-0.0068	-0.00944	-0.00453	-0.00264	-0.00604
				153.6	-442.16	-339.094		153.6	-0.01208	-0.00566	-0.00491	-0.0068	-0.00793	-0.0068	-0.00415	-0.00529
				153.7	-440.915	-336.291		153.7	-0.00755	-0.00151	-0.00642	-0.00453	-0.00642	-0.00453	-0.00415	-0.00566
				153.8	-445.274	-325.704		153.8	-0.01057	-0.00906	-0.00793	-0.0068	-0.00529	-0.0068	-0.00415	-0.00453
				153.9	-448.388	-330.063		153.9	-0.00718	-0.00453	-0.00755	-0.00453	-0.00642	-0.00755	-0.00566	-0.00378
				154	-450.879	-330.063		154	-0.01133	-0.000378	-0.00982	-0.00604	-0.00378	-0.00529	-0.00529	-0.00491
				154.1	-443.406	-336.602		154.1	-0.00906	-0.00642	-0.0102	-0.00642	-0.00944	-0.00453	-0.00604	-0.00529
				154.2	-439.981	-328.507		154.2	-0.01057	-0.00718	-0.00755	-0.0068	-0.00529	-0.00415	-0.00529	-0.00529
				154.3	-447.454	-324.459		154.3	-0.01171	-0.00491	-0.00642	-0.00604	-0.00529	-0.0034	-0.00415	-0.0034
				154.4	-450.568	-335.046		154.4	-0.00831	-0.00453	-0.00453	-0.00529	-0.00415	-0.00831	-0.00264	-0.00529
				154.5	-446.208	-336.602		154.5	-0.01095	-0.00491	-0.0034	-0.00415	-0.00529	-0.00604	-0.0034	-0.00302
				154.6	-450.568	-334.734		154.6	-0.01057	-0.00227	-0.0068	-0.00718	-0.0068	-0.00604	-0.00302	-0.0068
				154.7	-453.37	-341.896		154.7	-0.00869	-0.00566	-0.00793	-0.0068	-0.00491	-0.00718	-0.00415	-0.00453
				154.8	-447.765	-351.237		154.8	-0.00831	-0.00642	-0.00755	-0.0034	-0.0034	-0.00566	-0.00227	-0.00529
				154.9	-448.077	-357.154		154.9	-0.00906	-0.00566	-0.00604	-0.00718	-0.0034	-0.00642	-0.0034	-0.00415
				155	-452.125	-351.86		155	-0.00906	-0.00264	-0.00869	-0.0034	-0.00982	-0.00529	-0.00415	-0.00793
				155.1	-446.52	-354.04		155.1	-0.0102	-0.00302	-0.00718	-0.00604	-0.00529	-0.00793	-0.00415	-0.00831
				155.2	-441.226	-354.351		155.2	-0.01171	-0.00566	-0.00642	-0.00491	-0.0034	-0.00604	-0.00227	-0.0034
				155.3	-447.454	-350.303		155.3	-0.0102	-0.00415	-0.00755	-0.00566	-0.0068	-0.00566	-0.0034	-0.00566
				155.4	-457.107	-353.728		155.4	-0.00831	-0.00642	-0.00302	-0.00604	-0.00604	-0.00566	-0.00227	-0.00453
				155.5	-451.191	-362.758		155.5	-0.01095	-0.00869	-0.00529	-0.00378	-0.00529	-0.00453	-0.00453	-0.000755
				155.6	-449.945	-358.088		155.6	-0.00529	-0.00415	-0.00944	-0.0034	-0.0034	-0.00529	-0.000755	-0.00604
				155.7	-453.37	-352.171		155.7	-0.01208	-0.0034	-0.0068	-0.00755	-0.00378	-0.0068	-0.00227	-0.00378
				155.8	-450.879	-352.794		155.8	-0.01095	-0.00453	-0.00566	-0.00491	-0.00718	-0.00793	-0.00302	-0.00491
				155.9	-447.765	-347.501		155.9	-0.00982	-0.00453	-0.00906	-0.00566	-0.0034	-0.00227	-0.00189	-0.0068
				156	-443.717	-332.866		156	-0.01208	-0.00831	-0.00453	-0.00793	-0.00491	-0.00453	-0.0034	-0.00642
				156.1	-444.029	-330.686		156.1	-0.00944	-0.00491	-0.0068	-0.00642	-0.00529	-0.0034	-0.00227	-0.00453
				156.2	-436.556	-328.195		156.2	-0.00982	-0.0034	-0.00793	-0.00302	-0.00642	-0.00302	-0.00189	-0.00604
				156.3	-441.849	-329.129		156.3	-0.00869	-0.00831	-0.00529	-0.00264	-0.00604	-0.00869	-0.00566	-0.00529
				156.4	-451.191	-336.914		156.4	-0.01095	-0.00529	-0.00755	-0.0034	-0.0034	-0.0034	-0.00378	-0.00378
				156.5	-453.37	-342.207		156.5	-0.00906	-0.0068	-0.00604	-0.00642	-0.00302	-0.00793	-0.0034	-0.00642
				156.6	-452.436	-349.992		156.6	-0.00869	-0.00566	-0.00529	-0.00604	-0.00415	-0.00415	-0.00189	-0.00453
				156.7	-449.322	-341.585		156.7	-0.01057	-0.0068	-0.00642	-0.00453	-0.00491	-0.00378	-0.000755	-0.00604
				156.8	-446.208	-340.028		156.8	-0.0102	-0.00415	-0.00529	-0.00529	-0.00302	-0.00642	-0.00378	-0.00793
				156.9	-448.388	-338.782		156.9	-0.00793	-0.0068	-0.01057	-0.00491	-0.000755	-0.00831	-0.0034	-0.00415
				157	-456.173	-346.255		157	-0.01133	-0.0068	-0.0034	-0.00604	-0.00566	-0.00453	-0.00227	-0.00189
				157.1	-450.879	-339.716		157.1	-0.01208	-0.00415	-0.00491	-0.00453	-0.00642	-0.00793	-0.00151	-0.00642
				157.2	-455.861	-331.932		157.2	-0.01246	-0.00378	-0.00831	-0.000378	-0.00755	-0.00642	-0.00302	-0.00415
				157.3	-459.909	-327.572		157.3	-0.00793	-0.00491	-0.00302	-0.00755	-0.0068	-0.00604	-0.00113	-0.00491
				157.4	-444.029	-326.638		157.4	-0.01133	-0.00869	-0.00529	-0.00793	-0.00642	-0.00604	-0.00151	-0.00718
				157.5	-444.029	-323.836		157.5	-0.01095	-0.00491	-0.00604	-0.00604	-0.0034	-0.0068	-0.00264	-0.00566
				157.6	-444.029	-330.998		157.6	-0.01171	-0.00755	-0.00604	-0.00566	-0.00302	-0.00566	-0.00189	-0.00793
				157.7	-448.388	-335.668		157.7	-0.00642	-0.00642	-0.00491	-0.00491	-0.00415	-0.00302	-0.00302	-0.00453
				157.8	-457.107	-331.932		157.8	-0.0102	-0.0068	-0.00642	-0.0068	-0.00491	-0.00566	-0.00491	-0.00642
				157.9	-463.023	-326.95		157.9	-0.00944	-0.00642	-0.00151	-0.00642	-0.0068	-0.00529	-0.0034	-0.00491
				158	-455.861	-328.507		158	-0.00718	-0.00869	-0.00491	-0.00491	0.00189	-0.00831	-0.00604	-0.00529
				158.1	-454.927	-326.95		158.1	-0.01133	-0.00566	-0.00378	-0.00378	-0.00604	-0.00264	-0.00264	-0.00793
				158.2	-463.646	-326.638		158.2	-0.01171	-0.00415	-0.00415	-0.00491	-0.00189	-0.00566	-0.00529	-0.00642
				158.3	-461.466	-326.638		158.3	-0.01057	-0.00604	-0.00529	-0.00944	-0.00491	-0.00453	-0.000378	-0.00566
				158.4	-448.699	-333.177		158.4	-0.01586	-0.00869	-0.0068	-0.00529	-0.00415	-0.00604	-0.00227	-0.0068
				158.5	-444.029	-336.291		158.5	-0.01397	-0.00642	-0.00453	-0.00378	-0.00453	-0.00566	-0.00227	-0.00642
				158.6	-448.077	-340.65		158.6	-0.01246	-0.00491	-0.00227	-0.00491	-0.00415	-0.00491	-0.00302	-0.0034
				158.7	-442.783	-342.207		158.7	-0.01095	-0.00869	-0.00227	-0.00566	-0.000755	-0.00491	-0.00264	-0.00491
				158.8	-440.604	-335.668		158.8	-0.01133	-0.00453	-0.00642	-0.00529	-0.00566	-0.00642	-0.00151	-0.00642
				158.9	-442.783	-333.177		158.9	-0.01246	-0.00642	-0.00453	-0.00491	-0.00264	-0.00604	-0.00264	-0.00453
				159	-448.077	-337.537		159	-0.01322	-0.00604	-0.00566	-0.00642	-0.00189	-0.00906	-0.00491	-0.00453
				159.1	-444.652	-333.489		159.1	-0.0136	-0.00491	-0.00151	-0.0068	-0.00302	-0.00529	-0.00151	-0.00566
				159.2	-437.801	-330.063		159.2	-0.01737	-0.00453	-0.01057	-0.00604	-0.00302	-0.00453	0	-0.00642
				159.3	-433.442	-318.542		159.3	-0.01133	-0.00869	-0.00491	-0.00566	-0.00227	-0.00529	0.00151	-0.00906
				159.4	-437.178	-318.542		159.4	-0.0102	-0.0068	-0.00491	-0.00718	-0.000755	-0.00302	-0.00113	-0.00831
				159.5	-444.652	-315.74		159.5	-0.0136	-0.0068	-0.00302	-0.00378	-0.00378	-0.00755	-0.00453	-0.00415
				159.6	-445.897	-312.003		159.6	-0.01057	-0.00566	-0.00755	-0.00642	-0.00529	-0.00491	-0.0034	-0.00264
				159.7	-444.652	-313.872		159.7	-0.00831	-0.00793	-0.00378	-0.00755	-0.00415	-0.00642	-0.000755	-0.00604
				159.8	-435.933	-308.578		159.8	-0.01246	-0.0102	-0.00491	-0.00642	-0.00378	-0.0068	-0.00189	-0.00529
				159.9	-430.639	-315.429		159.9	-0.01246	-0.00642	-0.00378	-0.00604	-0.00906	-0.00378	-0.00189	-0.00491
				160	-417.25	-321.345		160	-0.01511	-0.00642	-0.00755	-0.00755	-0.00491	-0.00944	-0.000755	-0.00642
				160.1	-423.166	-317.92		160.1	-0.01284	-0.0068	-0.00604	-0.00302	-0.00227	-0.00755	-0.00227	-0.0068
				160.2	-429.705	-315.429		160.2	-0.00982	-0.00604	-0.00227	-0.00869	-0.00151	-0.00453	-0.00302	-0.00302
				160.3	-428.46	-319.165		160.3	-0.00982	-0.00755	-0.0034	-0.0068	-0.00302	-0.00453	-0.00302	-0.0068
				160.4	-427.526	-323.836		160.4	-0.01246	-0.00869	-0.00491	-0.0034	-0.00227	-0.00604	-0.00264	-0.00491
				160.5	-423.478	-320.722		160.5	-0.00944	-0.0068	-0.00415	-0.00982	-0.00227	-0.00415	-0.00264	-0.00453
				160.6	-427.837	-320.099		160.6	-0.01057	-0.0068	-0.0034	-0.00718	-0.00491	-0.00378	-0.00227	-0.00491
				160.7	-432.819	-311.692		160.7	-0.01208	-0.00831	-0.00453	-0.00302	-0.0034	-0.00415	-0.0034	-0.00415
				160.8	-436.867	-302.973		160.8	-0.0136	-0.00944	-0.00604	-0.00793	-0.00453	-0.0068	-0.0034	-0.00529
				160.9	-433.753	-298.614		160.9	-0.01435	-0.00869	-0.00491	-0.0034	-0.00378	-0.00642	-0.00227	-0.00793
				161	-434.999	-307.955		161	-0.01246	-0.00529	-0.00302	-0.00491	-0.000378	-0.00566	-0.00113	-0.00453
				161.1	-441.226	-310.446		161.1	-0.00906	-0.00529	-0.00264	-0.00529	0	-0.00491	-0.00113	-0.00529
				161.2	-438.424	-311.381		161.2	-0.00869	-0.00982	-0.00302	-0.00906	-0.00642	-0.00529	-0.00227	-0.00189
				161.3	-431.262	-318.854		161.3	-0.00793	-0.00529	-0.00453	-0.00944	-0.00227	-0.0034	-0.00189	-0.00491
				161.4	-435.31	-307.644		161.4	-0.01057	-0.00604	-0.00189	-0.00529	-0.00529	-0.00529	-0.00302	-0.00529
				161.5	-428.148	-312.315		161.5	-0.01057	-0.00491	-0.00453	-0.00529	-0.00302	-0.00604	-0.00415	-0.00718
				161.6	-420.052	-308.89		161.6	-0.01057	-0.00793	-0.00642	-0.0102	-0.000378	-0.00378	-0.00415	-0.00415
				161.7	-425.969	-314.494		161.7	-0.00944	-0.01171	-0.0034	-0.0068	-0.00529	-0.00491	-0.00189	-0.0034
				161.8	-428.771	-318.231		161.8	-0.00982	-0.00869	-0.00604	-0.00755	-0.00151	-0.00566	-0.00415	-0.00604
				161.9	-426.903	-316.674		161.9	-0.01095	-0.00642	-0.00302	-0.00982	-0.00302	-0.00529	-0.00264	-0.00566
				162	-427.837	-313.872		162	-0.00982	-0.00566	-0.00151	-0.00642	-0.00604	-0.00604	-0.00302	-0.00378
				162.1	-425.035	-308.267		162.1	-0.00793	-0.00831	-0.00415	-0.00453	-0.00453	-0.00302	-0.0034	-0.00491
				162.2	-421.921	-313.872		162.2	-0.01133	-0.01171	-0.00491	-0.00793	-0.0034	-0.00415	0	-0.0034
				162.3	-423.166	-320.722		162.3	-0.00944	-0.00642	-0.00227	-0.00793	-0.00189	-0.00529	-0.00227	-0.00718
				162.4	-424.1	-325.393		162.4	-0.00793	-0.00529	-0.00189	-0.00566	-0.00453	-0.00378	-0.00151	-0.00227
				162.5	-424.412	-334.423		162.5	-0.01133	-0.00718	-0.00415	-0.00793	-0.00151	-0.0034	-0.00378	-0.00264
				162.6	-420.675	-333.177		162.6	-0.00906	-0.00944	-0.00529	-0.00944	-0.00378	-0.00415	-0.00415	-0.00378
				162.7	-413.825	-325.393		162.7	-0.0068	-0.00793	-0.00415	-0.00566	-0.00302	-0.00415	-0.0034	-0.00415
				162.8	-421.298	-324.147		162.8	-0.00906	-0.00718	-0.00869	-0.00378	-0.000378	-0.0034	-0.0034	-0.00415
				162.9	-424.1	-330.063		162.9	-0.00982	-0.00755	-0.00491	-0.00831	-0.0034	-0.00604	-0.00453	-0.00264
				163	-419.741	-324.459		163	-0.01057	-0.0068	-0.000378	-0.01171	-0.00755	-0.00642	-0.00415	-0.00415
				163.1	-420.987	-323.836		163.1	-0.01435	-0.00718	-0.000755	-0.00415	-0.0034	-0.00566	-0.00264	-0.00378
				163.2	-421.921	-325.081		163.2	-0.01171	-0.0068	-0.00302	-0.00604	-0.00264	-0.0034	-0.000378	-0.00604
				163.3	-422.232	-317.297		163.3	-0.00831	-0.01057	-0.00264	-0.0068	-0.00755	-0.00415	-0.00529	-0.000755
				163.4	-422.232	-312.315		163.4	-0.00642	-0.00604	-0.00151	-0.00755	-0.000755	-0.00151	-0.00415	-0.00227
				163.5	-419.118	-310.135		163.5	-0.00793	-0.0068	-0.00227	-0.01057	-0.0068	-0.00604	-0.00302	-0.00453
				163.6	-420.052	-313.872		163.6	-0.00944	-0.00566	-0.00491	-0.0068	-0.000755	-0.00642	-0.00453	-0.00227
				163.7	-418.807	-316.674		163.7	-0.01246	-0.00453	-0.00453	-0.00869	-0.0034	-0.00189	-0.00189	-0.00415
				163.8	-419.118	-323.836		163.8	-0.00982	-0.00793	0.000755	-0.00491	-0.00491	-0.00189	-0.00415	-0.00302
				163.9	-419.118	-322.902		163.9	-0.00604	-0.00944	-0.00302	-0.00831	-0.0068	-0.0034	-0.00415	-0.00302
				164	-421.298	-321.033		164	-0.01057	-0.00566	-0.00491	-0.0068	-0.00453	-0.00529	-0.00264	-0.00453
				164.1	-420.987	-321.033		164.1	-0.00642	-0.00831	-0.00491	-0.00566	-0.0034	-0.00529	-0.00264	-0.00415
				164.2	-420.364	-317.297		164.2	-0.00906	-0.00869	-0.000755	-0.00944	-0.00566	-0.00566	-0.00491	-0.00415
				164.3	-426.28	-316.051		164.3	-0.00944	-0.00755	0.000378	-0.01133	-0.00604	-0.0034	-0.00566	-0.00227
				164.4	-429.705	-314.494		164.4	-0.00793	-0.00869	-0.00491	-0.00755	-0.00227	-0.00227	-0.00415	-0.00529
				164.5	-426.903	-310.758		164.5	-0.00944	-0.00793	-0.00718	-0.00793	-0.0068	-0.0034	-0.00491	-0.00453
				164.6	-427.526	-307.333		164.6	-0.0102	-0.00982	-0.00453	-0.00793	-0.0034	-0.00189	-0.00378	-0.0034
				164.7	-426.591	-301.728		164.7	-0.00793	-0.00642	-0.00302	-0.00642	-0.00113	-0.00453	-0.000755	-0.00302
				164.8	-422.855	-312.626		164.8	-0.00982	-0.0068	-0.00227	-0.00793	-0.00642	-0.00378	-0.00642	-0.00491
				164.9	-420.675	-308.89		164.9	-0.00793	-0.00831	-0.00378	-0.00944	-0.000755	-0.00415	-0.00113	-0.00302
				165	-425.035	-313.56		165	-0.00869	-0.0068	-0.00264	-0.00793	-0.00529	-0.0034	-0.00491	-0.00189
				165.1	-423.789	-308.578		165.1	-0.00831	-0.00453	-0.00415	-0.0102	-0.00529	-0.00227	-0.00302	-0.00227
				165.2	-417.561	-301.416		165.2	-0.00831	-0.0068	-0.00453	-0.01057	-0.00529	-0.00642	-0.0034	-0.00264
				165.3	-413.202	-294.255		165.3	-0.00869	-0.00944	-0.000755	-0.00831	-0.00566	-0.00189	-0.00264	-0.0068
				165.4	-412.268	-301.728		165.4	-0.01208	-0.00642	-0.00264	-0.00755	-0.00453	-0.00264	-0.00264	-0.00378
				165.5	-412.268	-304.219		165.5	-0.00793	-0.00869	-0.00604	-0.00944	-0.00302	-0.00415	-0.0034	-0.00264
				165.6	-413.825	-302.039		165.6	-0.01095	-0.00831	-0.00491	-0.0068	-0.00604	-0.00415	-0.00415	-0.00378
				165.7	-412.579	-301.728		165.7	-0.00755	-0.00491	-0.00378	-0.0068	-0.00453	-0.0034	-0.00227	-0.00453
				165.8	-411.957	-297.057		165.8	-0.00755	-0.00529	-0.00453	-0.00604	-0.00529	0	-0.0034	0
				165.9	-412.268	-291.764		165.9	-0.00982	-0.00566	-0.00113	-0.00642	-0.00227	-0.00869	-0.00529	-0.00227
				166	-411.957	-291.141		166	-0.00642	-0.00869	-0.00793	-0.00944	-0.00529	-0.0034	-0.00415	-0.00604
				166.1	-409.777	-288.65		166.1	-0.00944	-0.00906	-0.00491	-0.00793	-0.00642	-0.0068	-0.00793	-0.00415
				166.2	-411.334	-285.225		166.2	-0.01057	-0.00831	-0.0068	-0.00944	-0.00415	-0.00604	-0.00604	-0.00264
				166.3	-419.118	-288.65		166.3	-0.00604	-0.00869	-0.00189	-0.00944	-0.00378	-0.00302	-0.00302	-0.0034
				166.4	-418.184	-290.518		166.4	-0.00793	-0.00302	-0.00415	-0.00831	-0.00566	-0.00227	-0.00529	-0.0034
				166.5	-420.675	-298.303		166.5	-0.00453	-0.00604	-0.00264	-0.00944	-0.00566	-0.00302	-0.00378	-0.00302
				166.6	-418.496	-295.5		166.6	-0.01057	-0.00566	-0.00151	-0.00831	-0.00793	-0.000755	-0.00529	0
				166.7	-420.052	-295.5		166.7	-0.00982	-0.0068	-0.00453	-0.00982	-0.00302	-0.00151	-0.00491	-0.0034
				166.8	-416.316	-296.123		166.8	-0.01057	-0.00642	-0.00566	-0.00982	-0.00566	-0.00189	-0.00415	-0.00415
				166.9	-412.579	-297.368		166.9	-0.00529	-0.00604	-0.00642	-0.00982	-0.00604	-0.00378	-0.00529	-0.00378
				167	-422.855	-295.812		167	-0.0102	-0.00529	-0.00415	-0.00566	-0.00566	-0.0034	-0.00415	-0.00264
				167.1	-436.244	-302.662		167.1	-0.00906	-0.0068	-0.00415	-0.01057	-0.00566	-0.00227	-0.00453	-0.00491
				167.2	-430.017	-303.908		167.2	-0.01133	-0.00642	-0.00491	-0.00793	-0.00566	-0.0068	-0.00529	-0.0034
				167.3	-420.987	-316.985		167.3	-0.00906	-0.00453	-0.0034	-0.00906	-0.0068	-0.00378	-0.00604	-0.00227
				167.4	-419.118	-323.524		167.4	-0.01057	-0.00566	-0.00529	-0.00906	-0.00453	-0.00264	-0.00415	-0.00227
				167.5	-417.25	-333.489		167.5	-0.01057	-0.00831	-0.00227	-0.00944	-0.00755	0	-0.0034	-0.00415
				167.6	-415.382	-335.98		167.6	-0.00566	-0.00378	-0.00566	-0.00604	-0.00415	-0.00189	-0.00869	-0.00264
				167.7	-413.825	-327.572		167.7	-0.00869	-0.00793	-0.00491	-0.00982	-0.0034	-0.00491	-0.00491	-0.00302
				167.8	-420.052	-330.063		167.8	-0.00944	-0.00869	-0.00491	-0.01057	-0.0034	-0.00529	-0.00415	-0.00264
				167.9	-424.412	-313.872		167.9	-0.00718	-0.00415	-0.00113	-0.00944	-0.0068	-0.00415	-0.00378	-0.00302
				168	-426.591	-312.003		168	-0.01057	-0.00906	-0.00529	-0.00491	-0.00831	-0.00453	-0.00453	-0.00378
				168.1	-441.226	-308.578		168.1	-0.01473	-0.0102	-0.00566	-0.01057	-0.00793	-0.00415	-0.00227	-0.00227
				168.2	-439.047	-301.728		168.2	-0.0102	-0.00529	-0.00604	-0.00755	-0.00869	-0.00227	-0.00378	-0.00189
				168.3	-430.017	-308.578		168.3	-0.00566	-0.00718	-0.0034	-0.00793	-0.00378	-0.00529	-0.00566	-0.00189
				168.4	-429.082	-306.71		168.4	-0.00906	-0.00604	-0.00415	-0.00906	-0.0068	-0.00189	-0.00491	0.000755
				168.5	-428.46	-310.758		168.5	-0.0102	-0.00529	-0.00415	-0.00529	-0.00604	-0.00453	-0.00642	-0.00227
				168.6	-422.232	-309.824		168.6	-0.00529	-0.00453	-0.00529	-0.01057	-0.00604	-0.00415	-0.00869	-0.00227
				168.7	-424.723	-302.662		168.7	-0.00944	-0.00264	-0.00453	-0.00869	-0.0034	-0.00415	-0.00302	-0.00264
				168.8	-421.298	-307.644		168.8	-0.00944	-0.00831	-0.00378	-0.00944	-0.00755	-0.00378	-0.00491	-0.00415
				168.9	-423.789	-321.968		168.9	-0.00642	-0.00415	-0.00491	-0.00982	-0.00906	-0.00302	-0.00529	-0.00264
				169	-425.657	-323.836		169	-0.00831	-0.00982	-0.00453	-0.01057	-0.0068	-0.00378	-0.00529	-0.00227
				169.1	-428.148	-330.998		169.1	-0.01057	-0.0068	-0.00831	-0.00566	-0.00793	-0.00227	-0.00529	-0.00264
				169.2	-421.298	-338.782		169.2	-0.0102	-0.00529	-0.00642	-0.00566	-0.0068	-0.0034	-0.00604	-0.00302
				169.3	-428.148	-340.962		169.3	-0.00982	-0.0068	-0.00453	-0.00944	-0.00718	-0.00378	-0.00718	-0.00227
				169.4	-425.657	-342.207		169.4	-0.01057	-0.00566	-0.00529	-0.00944	-0.0068	-0.00415	-0.00604	-0.0034
				169.5	-427.526	-336.291		169.5	-0.00642	-0.00642	-0.00529	-0.00906	-0.00453	-0.0034	-0.0068	-0.00189
				169.6	-426.591	-336.914		169.6	-0.01133	-0.00566	-0.00227	-0.00529	-0.00264	-0.00566	-0.00755	-0.00529
				169.7	-423.166	-341.585		169.7	-0.00982	-0.00491	-0.00415	-0.00906	-0.0068	-0.00302	-0.0034	-0.00227
				169.8	-425.657	-327.884		169.8	-0.01057	-0.00718	-0.00604	-0.00831	-0.00378	-0.00302	-0.00529	0.000755
				169.9	-427.214	-318.854		169.9	-0.00944	-0.00491	-0.00755	-0.01057	-0.00453	-0.00302	-0.0034	-0.00227
				170	-429.705	-322.279		170	-0.00906	-0.00453	-0.00604	-0.0068	-0.00869	-0.00189	-0.00718	-0.00302
				170.1	-433.442	-332.555		170.1	-0.01057	-0.00604	0	-0.00529	-0.00831	-0.0034	-0.00642	0
				170.2	-440.915	-330.998		170.2	-0.00642	-0.00604	-0.0034	-0.0068	-0.00604	-0.00302	-0.00491	-0.0034
				170.3	-441.226	-329.129		170.3	-0.01057	-0.00378	-0.00642	-0.0068	-0.00604	-0.00604	-0.00529	-0.0034
				170.4	-443.095	-328.818		170.4	-0.0102	-0.0068	-0.00642	-0.00793	-0.0068	-0.00264	-0.00604	-0.00378
				170.5	-441.226	-334.423		170.5	-0.0068	-0.00642	-0.00604	-0.0068	-0.00869	-0.0034	-0.00453	-0.00378
				170.6	-434.065	-336.291		170.6	-0.00906	-0.00227	-0.00453	-0.00604	-0.00755	-0.00529	-0.00529	-0.00529
				170.7	-433.13	-326.638		170.7	-0.00869	-0.00378	-0.00869	-0.00793	-0.00604	-0.00718	-0.00453	-0.00302
				170.8	-441.538	-331.932		170.8	-0.00529	-0.00491	-0.00869	-0.00944	-0.00604	-0.000755	-0.00378	-0.00453
				170.9	-435.31	-323.524		170.9	-0.00869	-0.00529	-0.00491	-0.00982	-0.00831	-0.00491	-0.00453	-0.00189
				171	-436.244	-317.608		171	-0.00604	-0.00302	-0.00151	-0.00415	-0.0068	-0.00264	-0.00869	-0.00491
				171.1	-444.029	-317.297		171.1	-0.00529	-0.00755	-0.0068	-0.00642	-0.00755	-0.00415	-0.00264	-0.00302
				171.2	-442.16	-315.429		171.2	-0.01171	-0.0068	-0.00831	-0.00529	-0.0068	-0.00529	-0.00453	-0.00227
				171.3	-442.472	-323.836		171.3	-0.00604	-0.00906	-0.00755	-0.00831	-0.00906	-0.00227	-0.00415	-0.00151
				171.4	-433.753	-328.195		171.4	-0.00944	-0.00415	-0.0068	-0.00604	-0.00529	-0.00227	-0.00378	-0.00453
				171.5	-429.082	-314.183		171.5	-0.01322	-0.00529	-0.0068	-0.00869	-0.00566	-0.0068	-0.00755	-0.00151
				171.6	-422.855	-315.74		171.6	-0.00755	-0.00491	-0.00604	-0.0102	-0.00642	-0.00378	-0.00529	-0.00529
				171.7	-423.478	-326.327		171.7	-0.0068	-0.00529	-0.00755	-0.00453	-0.00642	-0.00302	-0.00453	-0.00453
				171.8	-425.657	-323.213		171.8	-0.00982	-0.00378	-0.00491	-0.00604	-0.00869	-0.00529	-0.00529	-0.00718
				171.9	-424.412	-317.608		171.9	-0.00831	-0.00529	-0.00793	-0.00529	-0.00906	-0.00302	-0.0068	-0.0034
				172	-431.262	-322.59		172	-0.01095	-0.0034	-0.00755	-0.00793	-0.00415	-0.00453	-0.00415	-0.00302
				172.1	-424.412	-323.213		172.1	-0.01171	-0.00302	-0.00793	-0.0068	-0.00831	-0.0068	-0.00264	-0.00415
				172.2	-424.1	-314.494		172.2	-0.00906	-0.00755	-0.00642	-0.00604	-0.00793	-0.00491	-0.00604	-0.00264
				172.3	-426.591	-313.56		172.3	-0.00869	-0.00264	-0.00869	-0.00566	-0.0068	-0.00227	-0.00566	-0.00151
				172.4	-429.082	-316.985		172.4	-0.00944	-0.00642	-0.00793	-0.00718	-0.00529	-0.00227	-0.00491	-0.00566
				172.5	-436.244	-323.213		172.5	-0.01284	-0.00378	-0.00491	-0.00604	-0.00604	-0.00453	-0.00378	-0.00529
				172.6	-435.621	-323.213		172.6	-0.0136	-0.00302	-0.0034	-0.00869	-0.00529	-0.00718	-0.00302	-0.00302
				172.7	-436.244	-309.512		172.7	-0.0102	-0.00302	-0.00529	-0.00718	-0.00755	-0.00302	-0.00415	-0.00415
				172.8	-439.981	-308.267		172.8	-0.00869	-0.00529	-0.00566	-0.00604	-0.00566	-0.00378	-0.0034	-0.00453
				172.9	-441.538	-312.938		172.9	-0.00831	-0.00529	-0.00755	-0.00491	-0.00793	-0.00453	-0.00718	-0.00453
				173	-440.915	-320.411		173	-0.00604	-0.00604	-0.0068	-0.00453	-0.00642	-0.00378	-0.0068	-0.00302
				173.1	-444.652	-323.524		173.1	-0.00982	-0.00566	-0.00831	-0.00831	-0.00529	-0.00264	-0.00227	-0.00415
				173.2	-437.801	-317.297		173.2	-0.0102	-0.00944	-0.00755	-0.00491	-0.00642	-0.00415	-0.00302	-0.00453
				173.3	-428.771	-321.345		173.3	-0.00944	-0.00227	-0.0068	-0.0068	-0.00604	-0.00642	-0.00604	-0.00227
				173.4	-429.082	-322.59		173.4	-0.00604	-0.00529	-0.0068	-0.00415	-0.00793	-0.00415	-0.00453	-0.00378
				173.5	-436.556	-321.345		173.5	-0.01246	-0.00491	-0.0068	-0.00453	-0.00415	-0.00302	-0.00491	-0.00453
				173.6	-439.669	-319.477		173.6	-0.00793	-0.00227	-0.00718	-0.00831	-0.00982	-0.0034	-0.00566	-0.00642
				173.7	-438.113	-322.902		173.7	-0.00982	-0.00378	-0.00982	-0.00491	-0.00529	-0.00604	-0.00566	-0.00415
				173.8	-440.604	-317.297		173.8	-0.01095	-0.00264	-0.00831	-0.00491	-0.00529	-0.00566	-0.00529	-0.00378
				173.9	-436.556	-314.494		173.9	-0.0102	-0.00264	-0.00453	-0.00566	-0.00604	-0.00415	-0.00227	-0.00453
				174	-436.556	-316.985		174	-0.00604	-0.00755	-0.00755	-0.00906	-0.00566	-0.00755	-0.0034	-0.0068
				174.1	-441.849	-324.147		174.1	-0.00944	-0.00151	-0.00869	-0.00755	-0.00566	-0.00302	-0.00415	-0.0034
				174.2	-442.472	-326.95		174.2	-0.00869	-0.0102	-0.00755	-0.00189	-0.00453	-0.00302	-0.00151	-0.00718
				174.3	-449.634	-323.213		174.3	-0.00906	-0.00302	-0.00566	-0.00264	-0.00378	-0.00529	-0.00453	-0.00491
				174.4	-445.274	-325.393		174.4	-0.01171	-0.00566	-0.0068	-0.00529	-0.00869	-0.00529	-0.00264	-0.00415
				174.5	-436.867	-323.213		174.5	-0.0102	-0.00264	-0.00189	-0.00529	-0.00604	-0.00604	-0.00415	-0.00566
				174.6	-439.669	-332.555		174.6	-0.00944	-0.0068	-0.01057	-0.00566	-0.00453	-0.00529	-0.00378	-0.00227
				174.7	-437.178	-335.98		174.7	-0.00718	-0.00755	-0.00944	-0.00529	-0.00491	-0.00793	-0.00491	-0.0034
				174.8	-441.226	-333.177		174.8	-0.00906	-0.00151	-0.00831	-0.00604	-0.00566	-0.00831	-0.00491	-0.0068
				174.9	-441.849	-335.357		174.9	-0.00906	-0.00491	-0.0068	-0.00529	-0.00604	-0.00415	-0.00302	-0.00378
				175	-446.52	-341.585		175	-0.00944	-0.0068	-0.00302	-0.00378	-0.00529	-0.00718	-0.00378	-0.0068
				175.1	-446.208	-344.387		175.1	-0.01133	-0.00604	-0.0068	-0.00642	-0.00604	-0.00566	-0.00453	-0.00566
				175.2	-445.897	-343.453		175.2	-0.01322	-0.00491	-0.00453	-0.00453	-0.00642	-0.00491	-0.00302	-0.00378
				175.3	-438.424	-343.141		175.3	-0.00718	-0.00491	-0.00529	-0.00529	-0.0034	-0.00491	-0.0034	-0.00453
				175.4	-434.999	-336.602		175.4	-0.00906	-0.00491	-0.0068	-0.00189	-0.00755	-0.00415	-0.00264	-0.00378
				175.5	-434.999	-335.046		175.5	-0.0102	-0.00718	-0.00793	-0.00529	-0.00415	-0.00566	-0.00453	-0.00566
				175.6	-435.621	-333.8		175.6	-0.00869	-0.00604	-0.00831	-0.0068	-0.00453	-0.00944	-0.00453	-0.00642
				175.7	-438.113	-342.83		175.7	-0.01133	-0.00491	-0.00491	-0.00831	-0.00378	-0.00869	-0.00227	-0.00453
				175.8	-437.178	-346.255		175.8	-0.00944	-0.00453	-0.00755	-0.00793	-0.00378	-0.00227	-0.00415	-0.00566
				175.9	-442.472	-343.764		175.9	-0.00869	-0.00566	-0.00869	-0.00604	-0.00566	-0.00604	-0.0034	-0.00642
				176	-441.226	-350.615		176	-0.00906	-0.00529	-0.00529	-0.00831	-0.00491	-0.00415	-0.00302	-0.00642
				176.1	-439.669	-346.567		176.1	-0.01171	-0.00793	-0.00491	-0.00453	-0.00529	-0.00491	-0.00264	-0.00566
				176.2	-438.113	-342.207		176.2	-0.01133	-0.00642	-0.00642	-0.00529	-0.00529	-0.00453	-0.00415	-0.00604
				176.3	-439.981	-339.405		176.3	-0.00982	-0.00453	-0.00642	-0.00378	-0.0068	-0.0068	-0.00264	-0.00378
				176.4	-440.915	-339.405		176.4	-0.00793	-0.00604	-0.0068	-0.0068	-0.00264	-0.00755	-0.00604	-0.00378
				176.5	-437.178	-338.159		176.5	-0.0102	-0.00415	-0.00642	-0.00604	-0.0034	-0.0068	0	-0.00604
				176.6	-426.903	-336.291		176.6	-0.00944	-0.00529	-0.0068	-0.00566	-0.00378	-0.00491	-0.0034	-0.0034
				176.7	-429.705	-335.357		176.7	-0.01095	-0.00566	-0.00566	-0.000378	-0.0034	-0.00453	-0.00151	-0.0034
				176.8	-433.442	-325.704		176.8	-0.01246	-0.00642	-0.00642	-0.00453	-0.00566	-0.00755	-0.00453	-0.00491
				176.9	-428.46	-318.231		176.9	-0.0102	-0.00831	-0.00566	-0.00453	-0.00453	-0.00415	-0.00264	-0.0034
				177	-430.951	-321.033		177	-0.00982	-0.00566	-0.00604	-0.00415	-0.0034	-0.00566	-0.0034	-0.00491
				177.1	-436.556	-321.968		177.1	-0.01057	-0.00566	-0.00604	-0.00793	-0.00718	-0.00566	-0.00302	-0.0034
				177.2	-434.065	-318.542		177.2	-0.00944	-0.0068	-0.00604	-0.00415	-0.00302	-0.00793	-0.00378	-0.00529
				177.3	-432.196	-310.446		177.3	-0.0102	-0.00491	-0.00604	-0.00453	-0.00529	-0.00869	-0.00453	-0.0068
				177.4	-426.903	-306.399		177.4	-0.01208	-0.00906	-0.0068	-0.00415	-0.00151	-0.00529	-0.00264	-0.00566
				177.5	-427.214	-308.578		177.5	-0.01171	-0.0068	-0.00491	-0.00755	-0.00415	-0.00793	-0.0034	-0.00453
				177.6	-433.442	-297.991		177.6	-0.01095	-0.00566	-0.00566	-0.00604	-0.00566	-0.00302	-0.00302	-0.00453
				177.7	-440.604	-302.039		177.7	-0.00793	-0.00604	-0.00793	-0.0068	-0.00113	-0.00453	0	-0.00604
				177.8	-439.669	-310.135		177.8	-0.00982	-0.00566	-0.00566	-0.00642	-0.00491	-0.00453	-0.00227	-0.00566
				177.9	-439.669	-308.578		177.9	-0.00642	-0.00529	-0.00604	-0.00982	-0.00529	-0.00831	-0.00642	-0.00529
				178	-437.49	-312.626		178	-0.00982	-0.00869	-0.00604	-0.00264	-0.00491	-0.00869	-0.00264	-0.00453
				178.1	-435.621	-307.644		178.1	-0.0102	-0.00529	-0.00378	-0.00566	-0.00227	-0.0034	-0.00415	-0.0068
				178.2	-425.657	-311.692		178.2	-0.0102	-0.0068	-0.00642	-0.00264	-0.00604	-0.00906	-0.00604	-0.00793
				178.3	-429.082	-313.872		178.3	-0.01246	-0.00604	-0.00453	-0.00529	-0.00491	-0.00302	-0.00264	-0.0068
				178.4	-422.232	-309.512		178.4	-0.01284	-0.00755	-0.00227	-0.00453	-0.000755	-0.00453	-0.0034	-0.0068
				178.5	-421.298	-310.135		178.5	-0.00453	-0.00755	-0.00642	-0.00415	-0.00415	-0.00491	0	-0.00604
				178.6	-428.148	-313.249		178.6	-0.01284	-0.0068	-0.0068	-0.00604	-0.0034	-0.0068	-0.00302	-0.00529
				178.7	-429.394	-313.56		178.7	-0.01435	-0.00491	-0.00264	-0.00491	-0.00378	-0.00566	-0.000755	-0.00378
				178.8	-426.591	-320.411		178.8	-0.00906	-0.00831	-0.00415	-0.00755	-0.00453	-0.00604	-0.000755	-0.00302
				178.9	-427.526	-312.626		178.9	-0.01284	-0.0068	-0.00869	-0.00415	0	-0.00491	-0.00264	-0.00642
				179	-424.723	-312.626		179	-0.00982	-0.00453	-0.00491	-0.0034	-0.00227	-0.00264	-0.00302	-0.00755
				179.1	-421.609	-323.524		179.1	-0.01284	-0.00982	-0.00453	-0.00642	-0.00264	-0.0068	-0.00529	-0.00491
				179.2	-425.969	-326.638		179.2	-0.01435	-0.00793	-0.00529	-0.00453	-0.00302	-0.00831	-0.000755	-0.0034
				179.3	-425.035	-325.704		179.3	-0.00869	-0.00642	-0.00415	-0.00793	-0.00378	-0.00491	0	-0.00793
				179.4	-422.232	-332.866		179.4	-0.00982	-0.00982	-0.00415	-0.0068	-0.00151	-0.00491	-0.00227	-0.00529
				179.5	-417.25	-330.686		179.5	-0.00944	-0.00566	-0.00302	-0.00453	-0.00604	-0.0034	-0.00302	-0.00604
				179.6	-425.035	-328.195		179.6	-0.01095	-0.00906	-0.00566	-0.00831	-0.0068	-0.0068	-0.00378	-0.00529
				179.7	-432.508	-323.836		179.7	-0.0102	-0.00604	-0.00718	-0.0068	-0.00415	-0.00529	-0.00189	-0.00113
				179.8	-438.735	-321.968		179.8	-0.01133	-0.00793	-0.000755	-0.00566	-0.0068	-0.00566	-0.00151	-0.00415
				179.9	-429.082	-318.854		179.9	-0.00755	-0.00906	-0.00529	-0.0068	-0.00642	-0.00453	-0.00264	-0.00604
				180	-425.657	-321.033		180	-0.00755	-0.00831	-0.00566	-0.00378	0	-0.00604	-0.0034	-0.00982
				180.1	-425.035	-323.524		180.1	-0.0136	-0.00604	-0.00113	-0.00491	-0.000755	-0.00529	-0.00189	-0.00869
				180.2	-428.46	-327.884		180.2	-0.01133	-0.00491	-0.00831	-0.00755	-0.00453	-0.0068	-0.00302	-0.00793
				180.3	-429.705	-322.59		180.3	-0.01057	-0.00718	-0.00378	-0.00718	-0.00113	-0.00378	-0.0034	-0.00189
				180.4	-427.526	-330.686		180.4	-0.00869	-0.00869	-0.00566	-0.00793	-0.00415	-0.00189	-0.000378	-0.00302
				180.5	-421.609	-331.62		180.5	-0.00944	-0.01057	-0.00227	-0.00642	-0.00227	-0.00604	-0.00189	-0.00566
				180.6	-417.873	-330.375		180.6	-0.01057	-0.0068	-0.00453	-0.00604	-0.00227	-0.00302	-0.00227	-0.00831
				180.7	-423.478	-335.98		180.7	-0.00982	-0.00793	-0.00529	-0.00491	-0.00378	-0.00529	-0.00302	-0.00491
				180.8	-420.987	-340.028		180.8	-0.01133	-0.00793	-0.00227	-0.00718	-0.00264	-0.00491	-0.00302	-0.00415
				180.9	-420.052	-337.848		180.9	-0.01133	-0.00642	-0.0034	-0.00718	-0.00453	-0.00378	-0.00189	-0.00642
				181	-425.969	-330.686		181	-0.01095	-0.00718	-0.00491	-0.00529	-0.00302	-0.00755	-0.00227	-0.00302
				181.1	-430.951	-330.375		181.1	-0.01095	-0.0068	-0.00302	-0.00529	-0.00415	-0.00302	-0.00302	-0.00642
				181.2	-428.771	-332.243		181.2	-0.0102	-0.00529	-0.00529	-0.00982	-0.00264	-0.00566	-0.00189	-0.00529
				181.3	-425.035	-327.572		181.3	-0.0068	-0.00302	-0.00302	-0.00566	-0.00491	-0.00642	-0.00453	-0.00642
				181.4	-423.789	-324.459		181.4	-0.01171	-0.00755	-0.00529	-0.00415	-0.00566	-0.00378	-0.00453	-0.00491
				181.5	-418.496	-332.555		181.5	-0.00982	-0.00831	-0.00302	-0.00642	-0.00415	-0.00491	-0.0034	-0.00453
				181.6	-415.693	-330.998		181.6	-0.01171	-0.00944	-0.00264	-0.00831	-0.0034	-0.00566	-0.00566	-0.00151
				181.7	-419.118	-324.459		181.7	-0.0102	-0.01057	-0.00302	-0.00906	-0.000755	-0.00491	-0.00227	-0.0034
				181.8	-418.184	-333.489		181.8	-0.00604	-0.00378	-0.00491	-0.00529	-0.00529	-0.0034	-0.00189	-0.00642
				181.9	-415.07	-330.375		181.9	-0.01171	-0.00944	-0.00189	-0.00755	-0.00415	-0.00378	-0.00415	-0.00604
				182	-414.759	-329.441		182	-0.01171	-0.00642	-0.00453	-0.00755	-0.00227	-0.00755	-0.00529	-0.00189
				182.1	-416.627	-328.195		182.1	-0.01133	-0.01057	-0.00227	-0.00415	-0.00642	-0.00566	-0.00302	-0.00415
				182.2	-416.005	-332.243		182.2	-0.00944	-0.00869	-0.00453	-0.01171	-0.00264	-0.00529	-0.0034	-0.00604
				182.3	-416.316	-329.441		182.3	-0.01208	-0.00793	-0.00264	-0.00869	-0.00264	-0.00378	-0.00264	-0.00415
				182.4	-418.807	-323.524		182.4	-0.00982	-0.00529	-0.00227	-0.00378	-0.00151	-0.00151	-0.00302	-0.0034
				182.5	-429.705	-330.375		182.5	-0.01095	-0.00831	-0.0068	-0.0068	-0.00415	-0.00378	-0.00378	-0.00529
				182.6	-426.903	-341.585		182.6	-0.00869	-0.0102	-0.00302	-0.00718	-0.00113	-0.00491	-0.0034	-0.00302
				182.7	-426.591	-335.357		182.7	-0.0068	-0.01171	-0.00604	-0.00491	-0.00189	-0.00189	-0.00151	-0.00415
				182.8	-421.609	-330.375		182.8	-0.00831	-0.0102	-0.00793	-0.00831	0	-0.00378	-0.00415	-0.00302
				182.9	-424.723	-324.147		182.9	-0.00869	-0.00604	0.000378	-0.01057	-0.00415	-0.00604	-0.00189	-0.00415
				183	-432.819	-323.524		183	-0.01057	-0.00566	-0.000755	-0.00793	-0.0068	-0.00529	-0.00302	-0.00453
				183.1	-430.328	-330.686		183.1	-0.01057	-0.00718	-0.00189	-0.00982	-0.00529	-0.00906	-0.00302	-0.00415
				183.2	-431.262	-328.195		183.2	-0.00755	-0.00453	-0.00604	-0.0034	-0.00415	-0.0034	-0.0034	-0.00453
				183.3	-434.065	-326.95		183.3	-0.01057	-0.00491	-0.00453	-0.0068	-0.00264	-0.0034	-0.00264	-0.0034
				183.4	-434.999	-316.674		183.4	-0.00831	-0.00755	-0.00113	-0.0102	-0.00529	-0.0034	-0.00264	-0.00453
				183.5	-427.526	-307.955		183.5	-0.01057	-0.0102	-0.00302	-0.00529	-0.00302	-0.00264	-0.00453	-0.00529
				183.6	-427.214	-304.219		183.6	-0.00793	-0.00793	-0.00529	-0.00793	-0.00151	-0.00566	-0.00415	-0.00529
				183.7	-434.687	-299.237		183.7	-0.00982	-0.0068	-0.0034	-0.00906	-0.00453	-0.00227	-0.00264	-0.000378
				183.8	-437.178	-309.201		183.8	-0.00831	-0.0068	-0.00529	-0.00944	-0.00264	-0.00415	-0.00453	-0.00604
				183.9	-440.292	-307.021		183.9	-0.0102	-0.00604	-0.00151	-0.00793	-0.00604	-0.0034	-0.00264	-0.00378
				184	-441.849	-305.464		184	-0.0102	-0.00491	-0.00264	-0.00755	-0.00604	-0.00227	-0.00302	-0.00302
				184.1	-433.13	-311.069		184.1	-0.00944	-0.00718	-0.0034	-0.00718	-0.0068	-0.00264	-0.00491	-0.00415
				184.2	-429.705	-319.477		184.2	-0.0102	-0.01171	0	-0.00566	-0.00415	-0.00529	-0.00491	-0.00378
				184.3	-431.574	-322.279		184.3	-0.0102	-0.00604	-0.00264	-0.00906	-0.00529	-0.00227	-0.00491	-0.00378
				184.4	-434.999	-317.608		184.4	-0.01095	-0.00793	-0.00415	-0.00944	-0.00566	-0.00415	-0.00302	-0.00566
				184.5	-434.687	-312.626		184.5	-0.00793	-0.00604	-0.00302	-0.00755	-0.00302	-0.00604	-0.00415	-0.00302
				184.6	-434.999	-318.231		184.6	-0.00755	-0.00566	-0.0068	-0.00906	-0.00264	-0.00415	-0.00378	-0.00755
				184.7	-435.621	-319.788		184.7	-0.00793	-0.00793	-0.00189	-0.00529	-0.00529	-0.00227	-0.00491	-0.00189
				184.8	-430.951	-322.279		184.8	-0.00944	-0.00529	-0.00227	-0.0102	-0.00529	-0.00264	-0.000378	-0.00189
				184.9	-423.166	-319.477		184.9	-0.0102	-0.00831	-0.00302	-0.00718	-0.00604	-0.00453	-0.00189	-0.00906
				185	-426.28	-322.902		185	-0.00604	-0.00755	-0.00566	-0.01133	-0.00227	-0.00227	-0.00491	-0.00264
				185.1	-423.478	-321.033		185.1	-0.00982	-0.00604	-0.00453	-0.00793	-0.00793	-0.00378	-0.00415	-0.0034
				185.2	-418.496	-318.231		185.2	-0.01095	-0.0068	-0.00378	-0.00944	-0.00642	-0.00415	-0.00831	-0.00189
				185.3	-419.118	-310.758		185.3	-0.0102	-0.0068	-0.000755	-0.00944	-0.00491	-0.00453	-0.00491	-0.00302
				185.4	-418.184	-312.626		185.4	-0.00831	-0.00906	-0.00378	-0.00944	-0.00264	-0.00378	-0.00264	-0.0034
				185.5	-420.987	-307.021		185.5	-0.00869	-0.00378	-0.00566	-0.00642	-0.00491	-0.00302	-0.00302	-0.0034
				185.6	-423.478	-296.123		185.6	-0.00906	-0.00793	0	-0.0068	-0.00566	-0.00113	-0.00793	-0.00189
				185.7	-424.412	-299.548		185.7	-0.00642	-0.00869	-0.00491	-0.00566	-0.00566	-0.00604	-0.00302	-0.00378
				185.8	-419.43	-296.746		185.8	-0.00831	-0.0068	-0.00415	-0.00831	-0.00604	-0.00453	-0.0034	-0.00227
				185.9	-413.202	-298.614		185.9	-0.0102	-0.00566	-0.00151	-0.00604	-0.00604	-0.00264	-0.00415	-0.00264
				186	-413.513	-302.351		186	-0.00755	-0.00453	-0.00151	-0.0034	-0.00529	-0.00415	-0.00529	-0.00415
				186.1	-414.136	-305.464		186.1	-0.00718	-0.00869	-0.00604	-0.01095	-0.00604	-0.00642	-0.00453	-0.00227
				186.2	-418.496	-310.446		186.2	-0.0068	-0.00831	-0.00529	-0.01246	-0.0068	-0.00302	-0.00415	-0.00264
				186.3	-422.232	-305.464		186.3	-0.00869	-0.00604	-0.00378	-0.00529	-0.00566	-0.00491	-0.00415	-0.00227
				186.4	-422.232	-302.973		186.4	-0.00869	-0.0068	-0.00453	-0.00906	-0.00453	-0.000378	-0.00453	-0.00491
				186.5	-422.544	-300.794		186.5	-0.0102	-0.0068	-0.00378	-0.0068	-0.00529	-0.00378	-0.00264	-0.00453
				186.6	-422.544	-297.368		186.6	-0.0102	-0.00718	-0.00566	-0.00982	-0.00415	-0.00378	-0.0068	-0.0034
				186.7	-431.262	-300.482		186.7	-0.00718	-0.00378	-0.0034	-0.00831	-0.00415	-0.00453	-0.00529	-0.0034
				186.8	-432.196	-312.315		186.8	-0.00944	-0.00793	-0.00529	-0.0102	-0.00604	0	-0.00415	-0.00302
				186.9	-425.969	-311.381		186.9	-0.00642	-0.00529	-0.00302	-0.01057	-0.00604	-0.00302	-0.00491	-0.00264
				187	-423.789	-303.285		187	-0.01246	-0.00642	-0.00566	-0.00982	-0.00491	-0.00227	-0.00415	-0.00604
				187.1	-416.627	-307.955		187.1	-0.00944	-0.00566	-0.00264	-0.0102	-0.00642	-0.00491	-0.0068	-0.00529
				187.2	-417.561	-309.512		187.2	-0.00944	-0.00642	-0.00529	-0.00869	-0.00453	-0.00151	-0.00491	-0.00113
				187.3	-416.316	-316.985		187.3	-0.00604	-0.00793	-0.00604	-0.00869	-0.00529	-0.00302	-0.00453	0
				187.4	-413.202	-312.003		187.4	-0.00831	-0.00566	-0.00453	-0.00755	-0.00415	-0.00227	-0.00529	-0.00227
				187.5	-404.172	-304.53		187.5	-0.00869	-0.00604	-0.00566	-0.00869	-0.00793	-0.00415	-0.00453	-0.00491
				187.6	-403.549	-311.692		187.6	-0.00755	-0.00566	-0.00302	-0.00642	-0.00566	-0.00415	-0.00453	-0.00453
				187.7	-401.681	-317.92		187.7	-0.00869	-0.00604	-0.00566	-0.00944	-0.0068	-0.00415	-0.00529	-0.00151
				187.8	-398.567	-317.297		187.8	-0.00944	-0.00831	-0.00491	-0.00831	-0.00529	-0.0068	-0.00491	-0.00227
				187.9	-403.549	-316.985		187.9	-0.00642	-0.00604	-0.00378	-0.00793	-0.00529	-0.00302	-0.00151	-0.00113
				188	-404.795	-320.411		188	-0.01246	-0.00793	-0.00415	-0.00944	-0.00793	-0.000378	-0.00264	-0.00113
				188.1	-405.106	-329.129		188.1	-0.00793	-0.00302	-0.00869	-0.00755	-0.0068	-0.00415	-0.00491	-0.00151
				188.2	-412.268	-329.441		188.2	-0.00755	-0.00982	-0.0034	-0.00642	-0.00642	-0.00453	-0.00529	-0.00415
				188.3	-416.939	-323.524		188.3	-0.00566	-0.00227	-0.00264	-0.00906	-0.00793	-0.00453	-0.00529	0
				188.4	-416.005	-323.524		188.4	-0.01208	-0.00793	-0.00604	-0.01208	-0.00755	-0.00415	-0.00529	-0.00378
				188.5	-410.711	-330.375		188.5	-0.00755	-0.0068	-0.00755	-0.00491	-0.00491	-0.00189	-0.00453	-0.00491
				188.6	-414.448	-331.932		188.6	-0.00831	-0.00566	-0.00453	-0.00642	-0.00529	-0.00302	-0.00529	0.000378
				188.7	-412.268	-327.572		188.7	-0.00831	-0.00831	-0.00491	-0.0102	-0.00793	-0.00453	-0.00718	-0.00151
				188.8	-402.304	-323.213		188.8	-0.00604	-0.00491	-0.0068	-0.00906	-0.00491	-0.00378	-0.0068	-0.00227
				188.9	-403.861	-323.836		188.9	-0.00944	-0.0034	-0.00302	-0.01133	-0.00642	-0.00189	-0.00453	-0.00264
				189	-399.19	-316.985		189	-0.00982	-0.00453	-0.00604	-0.00755	-0.00831	-0.00415	-0.00415	-0.00189
				189.1	-402.615	-318.854		189.1	-0.00906	-0.0068	-0.00302	-0.00869	-0.0068	-0.00378	-0.00491	-0.00264
				189.2	-406.04	-324.147		189.2	-0.00529	-0.00604	-0.00529	-0.00831	-0.00944	-0.00151	-0.00604	-0.00151
				189.3	-407.597	-310.758		189.3	-0.00755	-0.00529	-0.00415	-0.00906	-0.00642	-0.00264	-0.00831	-0.00227
				189.4	-402.615	-304.219		189.4	-0.01133	-0.00453	-0.00642	-0.00642	-0.00869	-0.00453	-0.00227	-0.00189
				189.5	-403.238	-307.021		189.5	-0.00718	-0.00566	-0.00604	-0.00906	-0.00491	-0.0034	-0.0068	-0.00227
[truncated: 10,604 more rows]
