# Supplementary material for: Functional implications of the exon 9 splice insert in GluK1 kainate receptors
Source: eLife. 2024 Nov 6;12:RP89755. doi: 10.7554/eLife.89755 (PMC11540303; doi:10.7554/eLife.89755)
Supplement: Figure 3—figure supplement 1—source data 1. [file elife-89755-fig3-figsupp1-data1.xlsx]

## Sheet: Figure 3- supplement 1
A												B
GluK1-1a + Neto1						GluK1-1a + Neto2						GluK1-1a				GluK1-1a + Neto1				GluK1-1a + Neto2				GluK1-2a				GluK1-2a + Neto1				GluK1-2a + Neto2
Time (ms)	3 uM	30 uM	100 uM	1000uM		Time (ms)	3uM	30 uM	100 uM	1000uM		Time (ms)	10 mM Glu	1 mM Kai		Time(ms)	10 mM Glu	1 mM Kai		Time(ms)	10 mM Glu	1 mM Kai		Time (ms)	10 mM Glu	1 mM Kai		Time(ms)	10 mM Glu	1 mM Kai		Time(ms)	10 mM Glu	1 mM Kai
0	-0.0172081	-1.89371	-1.12399	-0.502731		0	1.5773	-3.11045	-0.971211	2.4861		0	2.1431	7.18862		0	-5.68284	-1.24552		0	-1.21866	2.93414		0	-3.02351	-1.22108		0	5.52687	2.2513		0	-3.73079	1.18545
0.1	1.5397	0.597595	0.744354	-1.43678		0.1	-0.913895	-2.799	-1.90499	2.48601		0.1	0.274813	11.8593		0.1	-2.25765	-2.17966		0.1	1.27239	3.86828		0.1	-4.26903	-2.46661		0.1	0.233395	0.38302		0.1	-4.04217	4.92201
0.2	1.85108	0.286469	0.433029	0.742966		0.2	-3.40508	-3.73308	-3.7729	1.2404		0.2	1.83172	0.026865		0.2	-4.43731	-3.73657		0.2	0.338245	3.5569		0.2	-7.69422	1.26996		0.2	-0.0779858	4.74235		0.2	1.87407	1.18545
0.3	-0.951347	-2.82709	0.43309	-0.502487		0.3	-6.83041	-3.11025	-3.14977	2.79721		0.3	0.274813	-2.1528		0.3	-7.23974	-7.47313		0.3	1.89515	3.86828		0.3	-4.89179	-2.15522		0.3	-0.700747	-0.23974		0.3	-3.73079	-0.0600758
0.4	0.294174	-4.07236	1.99007	-1.74791		0.4	-4.96228	1.56053	0.587161	2.79711		0.4	-0.97071	-2.77556		0.4	-5.37146	-4.35933		0.4	-0.595896	2		0.4	-1.46661	-2.15522		0.4	-1.94627	-0.23974		0.4	-0.92836	6.47892
0.5	1.22831	-2.82658	-0.189529	-1.43646		0.5	-2.16	0.315069	-2.2149	3.1084		0.5	0.897574	-0.907277		0.5	-5.99422	-0.622761		0.5	0.961007	2.31138		0.5	-2.08937	1.26996		0.5	-5.68284	5.36511		0.5	-2.48526	4.61063
0.6	6.52179	-4.38324	-2.05775	1.36606		0.6	-5.58534	-4.97833	-2.52591	3.41969		0.6	-2.52761	0.961007		0.6	-2.56903	-2.80243		0.6	1.58377	4.49104		0.6	-6.13731	0.0244398		0.6	-1.63489	2.2513		0.6	0.628544	2.74235
0.7	3.71936	-0.0236511	0.744736	-0.502151		0.7	-3.40581	-2.17584	-0.0344982	1.55132		0.7	1.83172	2.82929		0.7	-5.68284	-1.24552		0.7	1.89515	2		0.7	-8.31698	-0.286941		0.7	4.59272	-1.79664		0.7	-2.79664	2.43097
0.8	-1.26273	-1.58031	-1.74626	-1.43622		0.8	-6.83115	-4.66682	-0.0341306	3.41951		0.8	2.45448	1.27239		0.8	-3.50317	-1.86828		0.8	-0.284515	2.62276		0.8	-5.51455	-3.08937		0.8	-1.63489	-1.17388		0.8	0.00578117	2.43097
0.9	4.03074	-2.20282	0.744858	0.432159		0.9	-4.963	-3.42123	0.277617	1.86251		0.9	3.07724	-1.21866		0.9	-3.81455	-0.934142		0.9	-1.53004	3.24552		0.9	-2.40075	-7.13731		0.9	-2.56903	1.93992		0.9	-3.10802	3.36511
1	6.83317	1.22263	2.30182	-1.43605		1	-2.78349	-6.22359	-2.52444	1.23966		1	-1.28209	0.026865		1	-9.4194	-4.35933		1	-1.53004	1.68862		1	-15.1674	-17.4129		1	-0.389367	2.2513		1	-3.73079	2.43097
1.1	2.78522	-0.956787	1.36774	0.743698		1.1	1.26431	-4.35523	-1.90131	0.928187		1.1	-0.97071	-1.21866		1.1	-3.81455	-3.42519		1.1	-1.53004	2		1.1	-18.5925	-16.7901		1.1	0.856155	-5.53321		1.1	-0.305599	2.74235
1.2	7.14455	-3.44759	2.9247	0.432404		1.2	2.50969	-2.1755	-1.27818	3.73052		1.2	3.38862	-1.53004		1.2	-6.3056	0.311381		1.2	-0.595896	0.754478		1.2	-11.4308	-9.62836		1.2	1.16754	-5.84459		1.2	5.29925	0.562685
1.3	4.03074	-3.13594	1.36786	2.30077		1.3	3.75505	-4.97786	-0.0322948	3.73043		1.3	3.07724	2.20653		1.3	-6.61698	-5.29347		1.3	-0.595896	2.93414		1.3	-36.6526	-46.6827		1.3	-1.94627	0.07164		1.3	1.2513	-0.0600758
1.4	3.0966	-0.0218964	1.67931	0.743942		1.4	-2.78407	-4.35503	-0.654689	2.17343		1.4	-0.0365675	1.27239		1.4	-5.99422	-2.49104		1.4	-0.907277	2.31138		1.4	19.3959	30.8511		1.4	-0.0779858	-0.23974		1.4	-2.79664	1.18545
1.5	8.07869	-0.333023	-0.188919	0.432648		1.5	-2.78423	1.24989	-0.965702	2.17334		1.5	3.38862	2.20653		1.5	-4.7487	-4.35933		1.5	-0.595896	3.5569		1.5	2.26996	-11.1853		1.5	3.03582	-3.97631		1.5	2.49683	-0.0600758
1.6	9.01283	-1.88968	2.30219	1.67825		1.6	-2.16161	-3.42076	-0.0311928	2.48463		1.6	0.274813	0.026865		1.6	-7.8625	-2.49104		1.6	-0.595896	2.62276		1.6	-4.89179	1.89272		1.6	0.544775	-1.17388		1.6	-2.17388	5.85616
1.7	4.6535	0.91301	0.43396	0.744202		1.7	-3.0959	-4.97759	-0.653587	2.79592		1.7	-4.08452	0.338245		1.7	-6.3056	-2.49104		1.7	-2.1528	3.5569		1.7	-7.07146	9.05448		1.7	-2.56903	-6.15597		1.7	2.18545	2.43097
1.8	6.2104	-1.57779	1.36816	1.36703		1.8	-4.34155	-3.42062	-0.0304585	2.17307		1.8	0.897574	0.026865		1.8	-7.55112	-0.934142		1.8	0.649626	1.06586		1.8	-3.95765	-7.76008		1.8	-2.25765	-2.73079		1.8	0.00578117	0.251305
1.9	4.34212	-2.2003	2.30237	0.432968		1.9	-4.65309	-2.17503	0.281289	2.17297		1.9	0.586194	3.45205		1.9	-7.23974	-4.04795		1.9	-0.284515	2.62276		1.9	2.89272	-1.53246		1.9	0.233395	-6.15597		1.9	-0.92836	0.251305
2	2.16246	-2.51143	0.745544	-0.189697		2	-2.78494	-3.73187	-0.652485	0.304599		2	0.586194	3.14067		2	-5.68284	-2.49104		2	-0.595896	3.24552		2	-3.95765	-3.40075		2	-2.56903	-12.3836		2	2.18545	3.36511
2.1	2.47384	-0.331512	1.36836	1.99004		2.1	-1.53957	-3.10904	2.77307	1.55003		2.1	0.897574	0.026865		2.1	-10.6649	-0.311381		2.1	-0.284515	4.17966		2.1	-1.15522	1.58134		2.1	0.544775	-13.0063		2.1	4.67649	3.05373
2.2	-1.26273	-0.331268	1.05704	0.433212		2.2	-1.53972	-4.97725	-0.0289893	5.59789		2.2	-0.0365675	3.14067		2.2	-6.92836	0		2.2	-0.907277	1.68862		2.2	2.26996	-5.58041		2.2	-1.32351	0.694401		2.2	2.18545	4.92201
2.3	-0.639969	-3.44481	1.0571	-0.500839		2.3	0.951187	-6.84547	-0.0286222	2.17261		2.3	2.1431	3.14067		2.3	-1.94627	-4.67071		2.3	-2.1528	3.5569		2.3	-1.15522	-2.46661		2.3	-2.56903	-0.551121		2.3	1.56269	0.874065
2.4	-0.328587	-0.0193787	0.434402	0.744766		2.4	0.0168915	-1.24055	0.905887	-1.87543		2.4	3.07724	1.27239		2.4	-6.3056	-5.29347		2.4	-0.595896	5.42519		2.4	-1.15522	-2.15522		2.4	0.544775	3.80821		2.4	0.628544	-1.3056
2.5	-0.328587	-1.57603	2.61412	2.61314		2.5	-0.917389	-4.04291	1.8404	3.41795		2.5	3.07724	0.338245		2.5	-5.06008	-2.80243		2.5	-1.84142	3.5569		2.5	-1.15522	-4.64627		2.5	1.7903	2.87407		2.5	6.54478	1.80821
2.6	2.47384	-0.330261	1.68005	-1.12335		2.6	-0.917542	-4.66561	-1.58442	3.10647		2.6	3.38862	2.82929		2.6	-5.68284	-1.86828		2.6	-0.284515	2.62276		2.6	-5.20317	-3.71213		2.6	-0.389367	3.49683		2.6	-2.48526	2.11959
2.7	5.27626	0.604126	1.36873	0.122253		2.7	2.50751	-2.17449	-0.027153	2.48362		2.7	2.1431	0.961007		2.7	-8.17388	-4.98209		2.7	-3.08694	1.37724		2.7	-5.20317	-1.84384		2.7	-3.50317	3.18545		2.7	-1.23974	-0.682838
2.8	7.76731	-0.0183716	0.434647	1.67924		2.8	-1.22922	-3.10857	1.53012	2.48353		2.8	4.32276	2.20653		2.8	-11.9104	-5.29347		2.8	-0.907277	1.68862		2.8	-1.15522	-0.286941		2.8	0.856155	-2.4194		2.8	1.2513	0.251305
2.9	4.03074	-0.0181274	0.123322	1.67932		2.9	-2.78627	-1.5516	1.84186	2.79482		2.9	-1.59347	4.07481		2.9	-6.3056	-2.80243		2.9	1.89515	3.5569		2.9	-2.40075	-0.909702		2.9	1.7903	-0.862501		2.9	-4.04217	-1.3056
3	9.01283	-1.2634	1.36891	1.05663		3	-4.03194	-3.73119	0.596709	3.1061		3	-0.0365675	0.961007		3	-5.99422	1.5569		3	0.338245	2.93414		3	1.6472	-4.33489		3	-1.32351	5.67649		3	3.74235	0.562685
3.1	4.6535	0.916519	1.68036	0.122589		3.1	0.950012	-4.66527	1.8426	2.79463		3.1	2.1431	-0.595896		3.1	-6.92836	-0.311381		3.1	0.026865	2.62276		3.1	-1.77799	0.33582		3.1	-1.01213	1.93992		3.1	-1.55112	0.562685
3.2	4.6535	2.47368	3.54869	2.61371		3.2	-1.85255	-2.17415	-1.27084	2.79454		3.2	-1.59347	0.961007		3.2	-7.23974	-3.11381		3.2	1.27239	3.24552		3.2	-2.40075	1.89272		3.2	-1.63489	4.74235		3.2	-7.46735	4.29925
3.3	5.89902	-1.26265	1.36909	2.61378		3.3	2.50662	-2.48547	0.597811	2.48307		3.3	4.63414	-0.284515		3.3	-5.68284	-2.80243		3.3	0.026865	1.68862		3.3	1.6472	-1.53246		3.3	1.16754	5.05373		3.3	-1.23974	2.11959
3.4	1.22831	-2.5079	1.05777	0.434204		3.4	4.99753	-3.10816	1.8437	1.23745		3.4	3.07724	0.961007		3.4	-9.10802	-2.17966		3.4	0.649626	2		3.4	2.89272	-0.909702		3.4	0.544775	1.00578		3.4	0.317162	1.18545
3.5	1.22831	1.22891	1.05783	0.43428		3.5	1.88358	-5.91052	2.46683	1.23736		3.5	-0.659329	-1.21866		3.5	-5.68284	-4.35933		3.5	0.338245	3.24552		3.5	2.26996	-2.15522		3.5	1.7903	3.80821		3.5	-1.23974	2.43097
3.6	2.16246	-0.0163574	2.92618	1.36852		3.6	-0.296234	-3.41941	2.4672	2.48279		3.6	3.07724	-0.907277		3.6	-5.99422	-1.24552		3.6	0.338245	3.5569		3.6	14.7252	12.4797		3.6	0.233395	1.93992		3.6	-0.305599	1.49683
3.7	0.605553	-0.0161133	1.68074	1.67998		3.7	-4.65572	-4.0421	0.287899	2.4827		3.7	1.52034	1.89515		3.7	-5.06008	-1.5569		3.7	0.026865	-0.179664		3.7	23.1325	15.2821		3.7	-2.25765	-1.17388		3.7	-4.66493	-0.371456
3.8	1.85108	-0.638611	1.36942	0.123154		3.8	-7.4583	-0.305468	0.599647	-1.25396		3.8	1.83172	-0.595896		3.8	-4.12593	-0.622761		3.8	0.338245	1.68862		3.8	4.13825	3.13825		3.8	4.28134	-1.79664		3.8	-2.48526	0.251305
3.9	-0.0172081	0.295776	1.99223	1.05737		3.9	-5.27876	-7.46716	-0.0227461	1.54837		3.9	1.20896	2.51791		3.9	-5.99422	-1.86828		3.9	-1.21866	1.37724		3.9	1.02444	0.958581		3.9	-1.63489	2.2513		3.9	-0.305599	4.92201
4	-2.19687	-0.326736	4.79472	2.30298		4	-3.09926	-5.28742	0.911763	1.2369		4	2.45448	6.25448		4	-10.6649	-1.5569		4	0.026865	1.68862		4	-0.221083	4.07239		4	-4.12593	-0.551121		4	-3.10802	3.36511
4.1	0.605553	2.47594	2.61511	1.99167		4.1	-0.296967	-2.79631	-0.0220118	-0.00871277		4.1	0.897574	3.14067		4.1	-6.92836	2.17966		4.1	1.27239	4.49104		4.1	2.58134	-4.64627		4.1	0.856155	1.31716		4.1	-0.92836	0.562685
4.2	-2.19687	-0.326233	0.746902	-0.810654		4.2	-4.65645	-3.10762	1.22388	2.17086		4.2	5.2569	0.026865		4.2	-3.50317	-3.11381		4.2	0.961007	1.68862		4.2	1.02444	0.0244398		4.2	-3.50317	7.23339		4.2	-2.79664	-0.371456
4.3	-4.9993	1.5423	1.36972	0.434937		4.3	-8.70453	-3.73032	-0.0212774	1.54801		4.3	3.7	2.82929		4.3	-5.68284	-0.311381		4.3	-1.21866	1.68862		4.3	-0.843844	-4.64627		4.3	-3.19179	7.23339		4.3	-2.17388	1.49683
4.4	-4.68792	-1.88263	0.435638	0.435013		4.4	-3.7226	-4.66439	1.22461	0.613772		4.4	2.45448	-0.907277		4.4	-6.92836	-3.42519		4.4	2.51791	4.17966		4.4	-3.02351	-1.84384		4.4	-1.94627	3.18545		4.4	-0.92836	3.05373
4.5	-4.9993	-0.0140991	0.435699	0.435104		4.5	-4.65688	-5.59847	0.913599	2.48196		4.5	3.38862	4.07481		4.5	-5.68284	-1.5569		4.5	-1.21866	3.86828		4.5	3.51548	-8.69422		4.5	-3.50317	4.11959		4.5	-0.61698	-0.682838
4.6	-0.328587	2.4772	0.747147	1.05794		4.6	-3.10013	-5.5984	2.47087	0.302208		4.6	0.274813	0.649626		4.6	-7.8625	-1.5569		4.6	1.89515	3.86828		4.6	1.33582	-3.08937		4.6	1.16754	5.05373		4.6	-4.66493	1.18545
4.7	-1.88549	-0.636353	0.747208	1.05803		4.7	3.75009	-2.7959	1.84848	1.23626		4.7	-1.59347	-2.77556		4.7	-6.92836	-0.311381		4.7	-0.284515	5.42519		4.7	3.82687	0.647201		4.7	2.72444	2.87407		4.7	0.628544	2.43097
4.8	-7.17896	0.609421	-0.809647	1.99225		4.8	0.636154	-3.4186	2.16022	-0.320737		4.8	3.07724	3.76343		4.8	-4.43731	-2.17966		4.8	-0.907277	4.80243		4.8	3.51548	-5.89179		4.8	-3.19179	2.2513		4.8	1.2513	0.251305
4.9	-5.31068	1.54381	-1.12096	2.30371		4.9	1.88153	-2.48439	1.84921	0.613312		4.9	1.20896	3.45205		4.9	-5.06008	0		4.9	1.89515	3.5569		4.9	2.58134	-1.53246		4.9	-0.0779858	0.38302		4.9	-0.305599	-0.994219
5	-3.44239	2.7896	-1.43228	3.23795		5	-0.298279	-2.7957	1.84958	1.54736		5	2.76586	-5.88937		5	-4.12593	-0.622761		5	-0.284515	1.68862		5	3.82687	2.82687		5	-0.389367	3.80821		5	1.87407	0.874065
5.1	-1.26273	4.03535	-2.36636	0.124222		5.1	-1.23257	-2.79564	4.65237	0.613129		5.1	0.897574	5.63172		5.1	-2.56903	-3.11381		5.1	0.338245	3.24552		5.1	4.76101	-3.71213		5.1	0.544775	5.98787		5.1	1.2513	4.92201
5.2	-2.19687	2.47871	-0.18663	0.747055		5.2	-0.298569	-4.97523	1.53893	0.613037		5.2	-0.0365675	3.45205		5.2	-3.19179	-0.622761		5.2	0.649626	3.86828		5.2	1.6472	-6.20317		5.2	-1.32351	0.694401		5.2	3.43097	0.251305
5.3	-0.328587	0.922058	-1.43208	3.23819		5.3	2.19232	-4.66379	1.85068	2.79261		5.3	2.45448	0.026865		5.3	-5.99422	-1.24552		5.3	0.961007	3.5569		5.3	4.44963	-4.64627		5.3	-1.32351	-2.10802		5.3	0.00578117	-2.23974
5.4	2.78522	0.610931	3.23869	1.36998		5.4	-4.03543	-2.79543	5.27623	2.48114		5.4	1.20896	2.20653		5.4	-6.61698	-1.5569		5.4	-3.08694	4.49104		5.4	0.713059	0.0244398		5.4	-1.01213	-4.59907		5.4	0.317162	3.67649
5.5	4.03074	1.8567	2.61598	2.30421		5.5	-0.921768	-0.927084	0.60589	-0.0100002		5.5	1.20896	0.649626		5.5	-2.56903	1.86828		5.5	0.026865	4.80243		5.5	-3.02351	0.33582		5.5	-0.700747	0.38302		5.5	0.628544	2.11959
5.6	3.0966	0.300064	1.37053	1.37015		5.6	-0.921921	0.629889	-4.37583	0.612669		5.6	1.52034	0.338245		5.6	-3.50317	-0.311381		5.6	2.51791	3.86828		5.6	1.33582	-2.77799		5.6	-2.25765	1.62854		5.6	4.67649	-0.994219
5.7	-0.639969	-1.25661	0.436447	-0.498062		5.7	-0.922058	-2.79523	-0.327517	1.8581		5.7	2.45448	6.87724		5.7	-5.06008	-2.17966		5.7	1.27239	0.754478		5.7	-3.02351	1.89272		5.7	-3.19179	4.11959		5.7	2.18545	4.61063
5.8	-2.50825	1.54608	1.99341	2.30446		5.8	-2.7905	-0.615499	0.295612	3.10353		5.8	0.274813	3.76343		5.8	-6.92836	-1.24552		5.8	1.27239	4.80243		5.8	1.33582	4.69515		5.8	-3.50317	-0.23974		5.8	1.2513	-1.3056
5.9	-2.81963	0.923569	1.37071	1.37039		5.9	-2.79063	-6.53166	-1.88369	1.54654		5.9	3.07724	1.89515		5.9	-9.73079	-2.49104		5.9	-2.1528	5.73657		5.9	2.58134	1.58134		5.9	-1.94627	3.49683		5.9	-1.23974	-0.0600758
6	-9.04725	0.301071	2.92767	2.30461		6	-1.54526	-4.97469	-0.637796	-1.56736		6	1.52034	0.961007		6	-4.7487	-3.11381		6	0.026865	3.5569		6	1.02444	-1.53246		6	-1.01213	2.56269		6	1.56269	-0.0600758
6.1	-2.19687	1.85822	1.68222	2.61609		6.1	-7.77301	-2.79496	-2.81709	-0.321932		6.1	1.52034	5.00896		6.1	-3.19179	-3.11381		6.1	0.961007	3.24552		6.1	2.89272	0.647201		6.1	-0.0779858	6.61063		6.1	4.05373	-0.0600758
6.2	-0.951347	3.41537	-0.497391	0.436493		6.2	-6.83902	-2.79489	-0.0142999	0.612117		6.2	3.07724	1.58377		6.2	-2.25765	-3.42519		6.2	-0.284515	3.86828		6.2	3.51548	-1.53246		6.2	-2.56903	5.36511		6.2	3.11959	-3.17388
6.3	-4.68792	-0.00956726	-0.808716	-0.186188		6.3	-3.72537	-3.72897	2.47711	-0.322116		6.3	-0.0365675	2.82929		6.3	-2.56903	-0.934142		6.3	1.89515	4.49104		6.3	-3.95765	-7.76008		6.3	-3.50317	7.23339		6.3	4.67649	0.562685
6.4	-5.31068	0.924835	-0.497269	1.05942		6.4	-2.79137	-6.21995	2.47748	-0.322208		6.4	-0.347948	2.51791		6.4	-4.12593	-0.934142		6.4	2.51791	2.31138		6.4	1.02444	-0.598322		6.4	4.28134	5.67649		6.4	0.00578117	-2.55112
6.5	-5.31068	2.48198	1.68246	0.436737		6.5	-0.611862	-5.59712	0.920944	0.611841		6.5	2.76586	5.32034		6.5	-2.25765	-4.67071		6.5	-1.21866	4.17966		6.5	1.95858	-4.33489		6.5	-0.0779858	2.2513		6.5	0.00578117	1.80821
6.6	-6.86758	-0.942947	0.12561	1.05959		6.6	-5.90546	-3.72877	0.60993	0.92313		6.6	-0.0365675	2.20653		6.6	-5.06008	-5.60485		6.6	-1.53004	4.80243		6.6	2.26996	-1.84384		6.6	-1.94627	3.18545		6.6	-2.48526	4.61063
6.7	-3.13101	1.54834	1.68259	2.30519		6.7	-5.90561	-5.59699	3.10134	1.85718		6.7	2.76586	1.27239		6.7	-1.32351	-4.35933		6.7	2.51791	2		6.7	8.80896	-2.15522		6.7	-2.25765	3.49683		6.7	2.80821	0.874065
6.8	0.294174	-0.00830078	1.68265	1.99388		6.8	-1.8578	-5.9083	0.299284	-0.633957		6.8	4.94552	1.89515		6.8	-0.389367	-1.86828		6.8	1.89515	5.73657		6.8	4.76101	-2.46661		6.8	0.233395	7.54478		6.8	2.80821	-1.3056
6.9	-1.26273	2.48299	1.37132	-1.11983		6.9	-2.7921	-3.41719	1.85655	-0.634049		6.9	2.1431	1.89515		6.9	-1.32351	-1.86828		6.9	-0.907277	4.17966		6.9	-0.532464	-1.22108		6.9	-3.19179	9.41306		6.9	4.36511	1.18545
7	-0.328587	1.23773	1.3714	1.37129		7	-6.84018	-2.48298	2.47968	1.54552		7	1.52034	1.27239		7	-3.81455	-1.86828		7	1.27239	5.73657		7	1.95858	0.647201		7	-0.0779858	7.85616		7	2.18545	-0.0600758
7.1	0.294174	1.86073	0.437317	1.68275		7.1	-1.23549	-4.35119	2.79143	2.16819		7.1	-0.0365675	3.45205		7.1	-6.61698	-7.16175		7.1	2.51791	5.11381		7.1	2.58134	0.0244398		7.1	-3.81455	9.10168		7.1	3.74235	-2.55112
7.2	-0.639969	2.17236	1.68291	0.437317		7.2	-2.16978	-6.84217	2.48042	0.611197		7.2	0.586194	3.45205		7.2	-4.7487	-4.04795		7.2	2.51791	5.73657		7.2	-1.77799	1.89272		7.2	-5.37146	9.72444		7.2	0.317162	2.74235
7.3	-0.951347	0.927094	2.6171	0.126022		7.3	0.00975037	-0.30311	1.54664	-0.323036		7.3	1.52034	1.27239		7.3	-1.94627	-6.85037		7.3	1.89515	2.93414		7.3	3.82687	-1.53246		7.3	-0.0779858	9.72444		7.3	3.43097	-1.92836
7.4	1.5397	1.8615	1.06026	-1.4308		7.4	-0.924545	-0.303043	-0.944035	0.611013		7.4	0.274813	4.07481		7.4	-5.37146	-3.42519		7.4	1.27239	4.49104		7.4	3.2041	-3.08937		7.4	-2.25765	9.41306		7.4	2.80821	-3.17388
7.5	0.605553	-0.629303	1.68309	1.06032		7.5	-4.97263	-1.5485	-0.320906	1.85644		7.5	-1.59347	2.51791		7.5	-4.12593	-2.49104		7.5	1.58377	4.17966		7.5	0.0902977	2.2041		7.5	0.544775	4.74235		7.5	-0.92836	0.251305
7.6	1.85108	0.927856	0.437622	0.437637		7.6	-9.02074	-3.10533	0.924984	-0.946073		7.6	0.897574	1.89515		7.6	-2.25765	-2.17966		7.6	0.961007	4.80243		7.6	0.401678	2.51548		7.6	0.233395	3.18545		7.6	0.00578117	-0.0600758
7.7	1.85108	3.41914	2.92873	1.06049		7.7	-6.21844	0.631302	3.4164	-1.88031		7.7	1.52034	1.58377		7.7	-3.19179	-2.17966		7.7	2.20653	3.24552		7.7	2.58134	-1.22108		7.7	-5.37146	9.41306		7.7	0.00578117	0.874065
7.8	2.47384	2.48526	1.99464	3.86299		7.8	-2.48203	-1.54829	0.614337	-0.946257		7.8	-0.0365675	0.026865		7.8	-3.19179	-2.49104		7.8	-1.53004	5.42519		7.8	-1.15522	-3.40075		7.8	1.16754	5.36511		7.8	6.54478	1.49683
7.9	2.78522	-1.87383	0.749191	0.437881		7.9	3.43407	-2.17099	1.54885	0.610554		7.9	2.1431	1.27239		7.9	-3.81455	-3.73657		7.9	1.89515	4.17966		7.9	4.44963	-2.77799		7.9	0.544775	5.98787		7.9	0.939924	-1.92836
8	1.22831	3.10852	-0.184891	0.437973		8	4.67943	0.00874138	0.615071	-3.43749		8	-0.97071	4.07481		8	-1.94627	-1.86828		8	0.961007	5.42519		8	2.58134	-7.4487		8	-1.63489	4.74235		8	2.18545	2.43097
8.1	1.5397	1.24049	3.55173	2.61772		8.1	3.74513	-2.17085	-0.318703	-2.19206		8.1	4.94552	2.51791		8.1	-2.25765	-1.5569		8.1	0.961007	3.86828		8.1	4.44963	-1.84384		8.1	-1.63489	6.29925		8.1	1.2513	1.18545
8.2	4.03074	3.10902	1.68352	1.37227		8.2	2.1881	-4.35045	2.79547	0.610278		8.2	0.586194	1.58377		8.2	0.544775	-4.04795		8.2	-0.907277	4.49104		8.2	1.95858	5.94067		8.2	-0.389367	10.97		8.2	1.2513	-0.994219
8.3	3.0966	1.86375	0.749435	-0.495926		8.3	4.05623	-5.59591	0.616173	3.72399		8.3	1.20896	2.51791		8.3	-1.63489	-2.80243		8.3	0.649626	4.17966		8.3	2.89272	4.07239		8.3	4.59272	8.16754		8.3	3.43097	-1.92836
8.4	4.96488	1.55263	2.92915	1.37244		8.4	-0.614624	-3.72755	0.61654	0.610094		8.4	0.586194	1.89515		8.4	-0.700747	-4.04795		8.4	0.649626	3.5569		8.4	-5.82593	1.26996		8.4	1.16754	4.74235		8.4	3.43097	-0.0600758
8.5	-0.0172081	2.17563	3.86336	-0.807129		8.5	4.6787	-6.21853	2.17381	-0.0127587		8.5	-1.90485	-0.284515		8.5	-0.0779858	-1.5569		8.5	2.51791	5.11381		8.5	-5.20317	0.958581		8.5	3.03582	6.61063		8.5	0.317162	3.36511
8.6	2.16246	1.8645	2.92929	1.3726		8.6	10.9062	-2.17052	1.8628	-0.0128508		8.6	1.20896	3.45205		8.6	0.233395	-6.53899		8.6	-0.284515	5.11381		8.6	-2.08937	-0.286941		8.6	-1.01213	11.9041		8.6	5.61063	-0.0600758
8.7	2.47384	-0.626282	1.68384	1.06129		8.7	7.48083	-4.97287	1.86317	-0.0129428		8.7	-0.0365675	5.00896		8.7	-3.81455	-3.11381		8.7	0.961007	5.42519		8.7	-3.02351	-0.598322		8.7	-0.389367	7.23339		8.7	1.56269	3.67649
8.8	0.916935	2.79915	4.48631	0.750015		8.8	3.43275	-1.54762	1.24077	2.78939		8.8	1.20896	0.338245		8.8	-2.56903	-3.11381		8.8	1.89515	2		8.8	-5.82593	5.31791		8.8	-1.32351	6.92201		8.8	-0.92836	-1.3056
8.9	1.5397	1.86526	4.175	1.06146		8.9	7.79193	-5.28412	-2.18405	2.16654		8.9	0.274813	2.51791		8.9	-2.56903	-4.35933		8.9	1.27239	3.5569		8.9	-3.02351	-1.22108		8.9	1.16754	7.85616		8.9	0.317162	-1.92836
9	-0.0172081	1.86551	2.30678	1.37292		9	5.61211	-4.97267	-1.56092	1.85506		9	4.01138	3.45205		9	-0.700747	-2.80243		9	0.026865	5.73657		9	-3.02351	4.07239		9	-1.01213	12.8382		9	4.36511	-0.682838
9.1	2.78522	3.73405	1.68408	-0.183884		9.1	2.18678	-4.9726	2.17601	-2.19298		9.1	-1.90485	2.51791		9.1	-1.94627	-0.622761		9.1	4.38619	6.67071		9.1	-3.33489	2.51548		9.1	0.544775	8.7903		9.1	2.49683	0.251305
9.2	4.03074	0.309113	1.37276	0.43895		9.2	4.98906	-2.17011	-0.314663	0.609358		9.2	-2.83899	2.51791		9.2	-3.50317	-2.49104		9.2	1.58377	4.49104		9.2	-3.02351	-4.33489		9.2	-4.43731	6.61063		9.2	0.317162	-0.682838
9.3	2.78522	2.48903	1.6842	1.37318		9.3	8.72549	0.00961876	-1.24844	-0.636256		9.3	-0.659329	0.649626		9.3	-2.56903	-1.5569		9.3	1.58377	5.42519		9.3	-3.95765	1.89272		9.3	-4.12593	5.67649		9.3	4.98787	1.18545
9.4	0.294174	3.11203	3.24117	0.439117		9.4	3.74324	-4.03826	-1.55945	0.297794		9.4	-0.659329	3.14067		9.4	-1.32351	-3.11381		9.4	3.14067	6.35933		9.4	-2.08937	2.51548		9.4	1.7903	2.87407		9.4	1.56269	3.36511
9.5	-0.639969	-1.55841	0.438797	2.30748		9.5	-0.927597	-5.5951	1.24334	0.297702		9.5	1.83172	6.25448		9.5	0.856155	-4.35933		9.5	4.07481	4.49104		9.5	-5.82593	0.647201		9.5	3.3472	-1.48526		9.5	0.939924	-0.371456
9.6	-3.13101	0.932877	1.68439	1.37343		9.6	-2.48465	-3.72675	1.55509	-1.57067		9.6	-3.15037	0.961007		9.6	0.544775	-1.86828		9.6	-0.284515	5.11381		9.6	-11.1194	-1.84384		9.6	2.10168	-2.4194		9.6	2.80821	1.49683
9.7	-3.13101	-0.623764	1.99582	0.127991		9.7	-4.04172	-2.16978	-0.624208	-0.948004		9.7	-0.659329	-1.53004		9.7	-2.25765	-5.60485		9.7	0.338245	2.93414		9.7	-26.0657	-1.84384		9.7	-1.01213	-6.46735		9.7	4.05373	-0.994219
9.8	-3.44239	-2.80319	0.750366	0.750824		9.8	-2.79633	-0.924187	-2.18074	-0.636716		9.8	-1.90485	-1.21866		9.8	-4.43731	-12.7666		9.8	2.82929	2.62276		9.8	-37.5868	-4.33489		9.8	-1.32351	-17.3657		9.8	3.43097	1.49683
9.9	-3.13101	-1.5574	1.68457	1.06229		9.9	-4.97614	-3.41517	1.55619	0.920095		9.9	-1.28209	-2.77556		9.9	-10.9763	-21.4853		9.9	0.338245	1.68862		9.9	-63.7427	5.00653		9.9	-9.73079	-28.5754		9.9	1.2513	-3.48526
10	-1.26273	-1.55716	1.996	1.37375		10	-1.55109	-4.34924	1.55656	2.47691		10	0.274813	0.961007		10	-19.695	-32.695		10	1.89515	1.37724		10	-104.534	5.00653		10	-18.7608	-53.4858		10	0.628544	-4.10802
10.1	3.0966	0	2.30745	0.128311		10.1	0.317032	-2.48089	0.622784	0.608531		10.1	-1.28209	-4.02108		10.1	-45.5396	-55.1144		10.1	-0.284515	0.754478		10.1	-169.924	1.89272		10.1	-39.6233	-73.4142		10.1	0.317162	-4.73079
10.2	3.71936	0.000244141	1.99612	1.37392		10.2	4.67622	-2.48082	2.80282	0.608439		10.2	-2.52761	-4.95522		10.2	-88.8215	-78.4679		10.2	2.51791	-1.73657		10.2	-251.194	-2.46661		10.2	-64.2224	-99.2588		10.2	0.00578117	-10.9584
10.3	3.40798	-1.24503	1.06206	-0.182907		10.3	3.43056	-5.59456	1.24628	-0.0144138		10.3	-8.13246	-2.77556		10.3	-175.074	-105.558		10.3	1.27239	-8.58694		10.3	-358.932	-7.4487		10.3	-95.6718	-139.738		10.3	-0.92836	-9.71288
10.4	6.83317	1.24628	-0.183395	1.0627		10.4	4.05318	-3.10345	0.623885	0.296875		10.4	-13.7373	-2.77556		10.4	-319.555	-143.546		10.4	4.38619	-13.2577		10.4	-476.633	-8.38284		10.4	-146.115	-181.463		10.4	-7.46735	-7.22183
10.5	5.27626	2.18066	-1.11748	0.440018		10.5	5.60992	-3.72614	-0.932651	0.919544		10.5	-21.8332	-2.1528		10.5	-521.952	-206.445		10.5	0.338245	-20.7308		10.5	-601.808	-13.3649		10.5	-226.14	-233.152		10.5	-6.53321	-12.5153
10.6	5.89902	0.312637	-0.494659	0.75148		10.6	4.05287	-4.66022	0.31324	0.29669		10.6	-33.0429	-4.33246		10.6	-781.332	-274.638		10.6	0.338245	-30.0722		10.6	-710.169	-19.2812		10.6	-335.435	-310.998		10.6	-9.02426	-21.234
10.7	7.45593	0.312897	0.750931	0.751572		10.7	5.29826	-4.97153	0.313607	1.23074		10.7	-51.7257	-5.57799		10.7	-1078.08	-340.962		10.7	-0.595896	-42.8388		10.7	-832.542	-28.934		10.7	-474.622	-396.316		10.7	-12.4494	-25.5933
10.8	2.78522	-0.621002	1.68513	1.99716		10.8	5.29811	-4.03732	0.936735	3.09893		10.8	-64.8037	-2.46418		10.8	-1382.92	-412.891		10.8	0.026865	-57.7851		10.8	-942.77	-33.6047		10.8	-645.259	-480.077		10.8	-20.5453	-37.4258
10.9	0.294174	-1.55489	-0.18309	0.128967		10.9	-0.306885	-6.5283	1.87124	-0.326346		10.9	-89.7142	-9.31455		10.9	-1665.65	-500.389		10.9	-5.26661	-82.6955		10.9	-1024.66	-56.9582		10.9	-819.009	-580.342		10.9	-26.1502	-44.5875
11	4.6535	-1.86603	2.61938	0.129059		11	0.627106	-4.97132	-1.55358	-0.326438		11	-108.086	-12.117		11	-1921.3	-626.809		11	-8.69179	-102.313		11	-1086.32	-74.0841		11	-979.059	-700.223		11	-32.3778	-55.4858
11.1	3.40798	-3.11128	1.06255	-0.805008		11.1	3.4294	-4.03712	0.00369501	-0.0151496		11.1	-134.864	-11.4942		11.1	-2128.36	-759.146		11.1	-25.5063	-111.343		11.1	-1140.5	-100.24		11.1	-1133.19	-807.65		11.1	-54.1744	-71.6776
11.2	-0.951347	2.80519	-0.805679	0.440582		11.2	2.18372	-1.85739	0.938204	-0.949384		11.2	-154.17	-15.8535		11.2	-2302.74	-857.542		11.2	-42.3209	-136.564		11.2	-1180.98	-126.396		11.2	-1353.96	-913.831		11.2	-70.0549	-85.067
11.3	-2.50825	0.625778	-0.494232	1.06343		11.3	2.18358	-1.23456	0.31581	-0.0153337		11.3	-171.919	-19.2787		11.3	-2471.19	-954.382		11.3	-71.2793	-163.654		11.3	-1215.54	-152.552		11.3	-1570.06	-1048.97		11.3	-88.4263	-101.882
11.4	-3.44239	0.314651	-0.494171	-0.493393		11.4	3.42896	-1.85725	-0.306584	-0.326806		11.4	-192.158	-26.7519		11.4	-2584.85	-1059.94		11.4	-102.106	-188.876		11.4	-1246.37	-181.51		11.4	-1810.76	-1218.67		11.4	-116.139	-126.481
11.5	0.916935	-2.17615	-0.49411	-0.493301		11.5	0.937759	-4.34823	-1.24036	0.607244		11.5	-217.069	-28.6202		11.5	-2687.6	-1157.71		11.5	-141.029	-214.098		11.5	-1266.92	-214.828		11.5	-2048.34	-1404.88		11.5	-150.391	-148.9
11.6	4.03074	-1.24176	0.75148	-0.181839		11.6	-0.619293	-2.47988	-0.30585	1.22991		11.6	-244.159	-37.3388		11.6	-2763.27	-1267.32		11.6	-178.083	-243.368		11.6	-1270.65	-259.667		11.6	-2262.57	-1591.08		11.6	-191.493	-173.499
11.7	4.03074	-1.2415	2.9312	-0.181763		11.7	-0.619446	-4.65948	-1.23962	1.22982		11.7	-268.135	-51.6623		11.7	-2828.35	-1382.22		11.7	-223.233	-259.56		11.7	-1272.21	-290.182		11.7	-2490.81	-1770.13		11.7	-229.793	-196.541
11.8	4.6535	0.00427246	1.06297	-1.11581		11.8	-4.04477	-3.1025	0.629027	2.47525		11.8	-284.016	-63.8062		11.8	-2890.94	-1494.32		11.8	-274.611	-281.045		11.8	-1259.44	-328.171		11.8	-2735.56	-1953.53		11.8	-267.159	-215.535
11.9	11.8153	1.25006	0.128891	1.06392		11.9	-5.60182	-3.41382	-0.304748	-0.327266		11.9	-292.423	-73.7703		11.9	-2931.73	-1591.16		11.9	-347.163	-307.512		11.9	-1241.38	-366.471		11.9	-2970.34	-2128.84		11.9	-302.345	-242.626
12	7.45593	1.25031	0.75174	0.129868		12	-2.17677	-2.16823	-2.48404	-1.57288		12	-301.764	-86.2256		12	-2927.99	-1681.14		12	-411.618	-334.291		12	-1207.44	-396.363		12	-3207.61	-2300.72		12	-343.447	-269.716
12.1	5.58764	2.18469	-1.42787	0.129959		12.1	-1.86554	-6.52749	-0.926775	2.78636		12.1	-319.513	-104.286		12.1	-2924.56	-1760.23		12.1	-462.373	-370.723		12.1	-1181.6	-417.226		12.1	-3397.55	-2460.77		12.1	-389.22	-297.74
12.2	4.34212	-0.928864	-1.11642	0.130035		12.2	0.31398	-2.47947	0.319115	0.917981		12.2	-326.675	-132.31		12.2	-2924.56	-1834.97		12.2	-513.44	-389.094		12.2	-1151.08	-440.579		12.2	-3618.63	-2637.32		12.2	-432.813	-323.273
12.3	4.34212	0.316925	-0.804993	-1.1154		12.3	0.9366	-3.10217	-1.5488	1.54065		12.3	-345.046	-156.909		12.3	-2929.86	-1902.54		12.3	-567.931	-401.861		12.3	-1126.48	-476.077		12.3	-3850.92	-2816.99		12.3	-483.257	-340.399
12.4	5.89902	-2.48526	-0.182159	-0.492569		12.4	4.05025	-2.79072	-0.302911	-0.016345		12.4	-362.172	-163.137		12.4	-2922.07	-1954.85		12.4	-613.704	-426.771		12.4	-1096.59	-509.394		12.4	-4013.77	-3025.3		12.4	-534.323	-369.98
12.5	7.76731	1.25157	-1.73901	-0.492493		12.5	7.16393	-4.65894	-0.302544	-0.639199		12.5	-380.232	-178.706		12.5	-2912.11	-2017.12		12.5	-667.885	-452.616		12.5	-1056.42	-546.76		12.5	-4164.79	-3220.85		12.5	-582.276	-396.448
12.6	9.63559	-1.23924	-0.182037	-0.803772		12.6	0.624771	-2.4792	-0.924938	1.54037		12.6	-386.149	-195.832		12.6	-2903.39	-2076.29		12.6	-713.035	-477.838		12.6	-1024.35	-567.622		12.6	-4332.94	-3410.79		12.6	-628.36	-407.035
12.7	10.8811	1.25208	0.752167	-0.803696		12.7	2.49292	0.0119076	1.25509	2.16304		12.7	-386.771	-218.251		12.7	-2872.25	-2139.5		12.7	-762.856	-504.616		12.7	-991.968	-576.964		12.7	-4462.79	-3603.85		12.7	-668.528	-436.616
12.8	9.01283	-0.927353	-1.11606	-1.11501		12.8	-1.86656	1.2575	-0.924204	-1.57362		12.8	-401.095	-241.604		12.8	-2840.18	-2204.89		12.8	-820.772	-528.593		12.8	-963.321	-592.844		12.8	-4558.07	-3796.9		12.8	-712.122	-470.245
12.9	8.07869	2.18671	-1.116	-1.11491		12.9	0.00158691	-2.79038	-2.16936	2.78562		12.9	-410.125	-253.126		12.9	-2816.52	-2265.61		12.9	-883.671	-542.916		12.9	-920.662	-616.821		12.9	-4660.82	-3990.27		12.9	-747.93	-501.383
13	7.76731	2.49834	-0.493179	-1.42622		13	1.24695	-1.85617	0.322053	-0.951039		13	-408.568	-265.269		13	-2785.38	-2323.21		13	-945.947	-567.204		13	-885.788	-637.683		13	-4763.27	-4182.39		13	-788.099	-528.162
13.1	4.6535	-0.303833	-1.73865	-2.0489		13.1	4.67198	-4.96991	-1.23448	-0.0169888		13.1	-403.897	-284.886		13.1	-2749.88	-2379.57		13.1	-998.259	-583.707		13.1	-867.728	-636.749		13.1	-4851.08	-4331.23		13.1	-824.219	-551.827
13.2	4.96488	0.630554	1.06384	-0.803284		13.2	7.78566	-0.921896	-2.16826	0.917061		13.2	-411.059	-294.851		13.2	-2709.4	-2426.59		13.2	-1047.77	-623.252		13.2	-842.817	-641.731		13.2	-4926.12	-4478.83		13.2	-856.602	-574.869
13.3	4.34212	0.00805664	-2.36128	-0.803207		13.3	10.8993	-1.85597	-3.41341	2.16249		13.3	-419.466	-310.108		13.3	-2663.63	-2470.18		13.3	-1099.77	-653.145		13.3	-805.763	-649.204		13.3	-4957.88	-4627.36		13.3	-895.525	-596.665
13.4	7.14455	0.00830078	-0.804321	-0.491745		13.4	5.6057	-0.299	-2.79028	2.1624		13.4	-421.957	-320.072		13.4	-2637.16	-2499.45		13.4	-1155.82	-668.714		13.4	-788.948	-658.857		13.4	-5003.96	-4755.64		13.4	-930.4	-625.935
13.5	6.83317	-0.925583	0.441269	0.442474		13.5	3.42589	2.81487	-2.16716	-1.57426		13.5	-428.808	-331.905		13.5	-2602.29	-2534.64		13.5	-1201.9	-696.115		13.5	-765.595	-652.941		13.5	-5047.56	-4882.38		13.5	-970.256	-644.929
13.6	5.27626	2.49985	-0.804184	-0.491592		13.6	8.09645	0.635277	-3.72369	0.293932		13.6	-442.508	-347.785		13.6	-2569.59	-2563.6		13.6	-1238.65	-718.223		13.6	-740.996	-643.599		13.6	-5077.14	-4996.65		13.6	-1001.08	-672.331
13.7	3.71936	0.631821	-0.181351	-1.11426		13.7	4.67111	-3.41261	-3.41194	-1.88582		13.7	-445.934	-361.797		13.7	-2532.54	-2606.26		13.7	-1270.09	-745.936		13.7	-718.265	-637.372		13.7	-5084.61	-5135.53		13.7	-1022.26	-699.421
13.8	0.294174	-0.613449	1.37561	-1.73694		13.8	9.34169	-3.41254	-2.16605	-0.0176325		13.8	-449.67	-372.073		13.8	-2481.78	-2642.06		13.8	-1318.67	-779.254		13.8	-701.762	-629.587		13.8	-5091.46	-5269.73		13.8	-1042.81	-731.805
13.9	0.605553	1.56647	-0.181229	-1.73686		13.9	9.34154	-2.16695	-0.920164	-0.640486		13.9	-443.754	-374.564		13.9	-2442.24	-2677.25		13.9	-1346.07	-807.59		13.9	-683.702	-630.833		13.9	-5101.43	-5379.34		13.9	-1064.6	-751.733
14	4.96488	-2.79262	-1.11531	0.131516		14	-3.05176e-05	-2.47826	-2.78808	-0.329196		14	-435.347	-379.235		14	-2402.38	-2702.47		14	-1387.17	-818.177		14	-657.546	-650.138		14	-5115.75	-5477.11		14	-1081.11	-777.578
14.1	0.605553	1.87836	-0.803879	0.754349		14.1	-2.17984	-2.47819	1.26023	-0.64067		14.1	-437.526	-392.313		14.1	-2358.16	-2712.44		14.1	-1407.72	-835.302		14.1	-636.994	-656.366		14.1	-5100.49	-5565.55		14.1	-1097.61	-794.081
14.2	5.27626	-3.10349	-2.04933	-0.491089		14.2	0.933823	-4.34641	-3.09873	0.29338		14.2	-453.718	-404.145		14.2	-2302.74	-2732.99		14.2	-1419.87	-858.033		14.2	-622.671	-652.629		14.2	-5078.38	-5687.92		14.2	-1108.82	-809.65
14.3	6.2104	-1.85771	-2.36066	-0.179626		14.3	-0.934601	-2.78944	-2.4756	0.604669		14.3	-453.407	-409.127		14.3	-2236.1	-2760.08		14.3	-1439.49	-867.375		14.3	-594.024	-642.665		14.3	-5035.41	-5786		14.3	-1114.43	-831.758
14.4	3.71936	-1.54608	-1.42645	-2.98198		14.4	2.80182	-4.03489	-1.85247	-1.26371		14.4	-453.407	-416.289		14.4	-2190.64	-2795.26		14.4	-1452.56	-895.71		14.4	-572.85	-636.749		14.4	-5023.27	-5875.68		14.4	-1128.75	-845.458
14.5	-0.951347	-1.23445	1.06465	-1.42499		14.5	3.73581	-5.28035	0.0161815	1.22725		14.5	-461.814	-424.696		14.5	-2148.29	-2823.29		14.5	-1469.69	-917.818		14.5	-561.952	-625.851		14.5	-4989.64	-5946.68		14.5	-1137.47	-872.549
14.6	-3.44239	-0.922821	1.3761	-3.2932		14.6	2.80153	-1.8551	-2.16312	2.47268		14.6	-472.712	-429.99		14.6	-2102.52	-2840.41		14.6	-1489.62	-934.01		14.6	-540.466	-615.575		14.6	-4969.4	-6039.16		14.6	-1137.16	-900.884
14.7	-3.44239	1.2571	-2.04903	-2.04759		14.7	4.35829	0.0132561	-3.09689	1.22706		14.7	-468.353	-425.942		14.7	-2058.62	-2865.64		14.7	-1514.84	-955.495		14.7	-520.849	-609.347		14.7	-4967.53	-6130.08		14.7	-1150.23	-923.615
14.8	2.78522	-4.03612	-2.67172	-2.35889		14.8	5.60365	-0.920818	-3.4079	3.40663		14.8	-452.784	-439.954		14.8	-2022.5	-2887.74		14.8	-1539.44	-965.771		14.8	-503.412	-603.431		14.8	-4955.7	-6209.79		14.8	-1173.9	-935.447
14.9	4.6535	-0.299316	-1.73753	-1.42467		14.9	6.22627	-1.23213	-4.0303	2.4724		14.9	-459.323	-448.984		14.9	-1968	-2902.07		14.9	-1555.01	-981.029		14.9	-482.861	-590.976		14.9	-4917.09	-6270.2		14.9	-1200.37	-945.412
15	3.0966	0.0123291	-1.73747	-2.35873		15	2.48956	-0.609301	-4.02993	1.53817		15	-464.928	-453.655		15	-1918.18	-2933.52		15	-1573.07	-996.286		15	-462.933	-598.138		15	-4886.26	-6343.69		15	-1220.29	-964.094
15.1	4.96488	-1.85571	0.442261	-1.11311		15.1	1.86665	-1.232	-5.27509	2.16084		15.1	-469.91	-467.044		15.1	-1868.98	-2959.67		15.1	-1566.84	-999.089		15.1	-440.825	-601.252		15.1	-4859.48	-6415.3		15.1	-1233.68	-990.25
15.2	2.16246	0.0128326	-0.803207	-0.49028		15.2	4.98032	-1.54331	-3.71782	-0.641681		15.2	-487.036	-482.613		15.2	-1806.71	-2978.98		15.2	-1573.38	-1031.16		15.2	-418.405	-612.461		15.2	-4823.05	-6491.9		15.2	-1238.35	-1008.31
15.3	-0.639969	-3.41211	-0.491745	-0.490189		15.3	-1.24745	-3.10015	-2.16055	-1.57592		15.3	-492.018	-491.02		15.3	-1773.08	-2986.76		15.3	-1594.24	-1049.84		15.3	-400.968	-626.162		15.3	-4751.75	-6561.34		15.3	-1245.52	-1024.81
15.4	2.78522	-0.920807	-2.35997	-1.73563		15.4	-2.4931	-2.47732	-4.65122	2.47194		15.4	-492.641	-491.955		15.4	-1744.12	-2997.35		15.4	-1615.73	-1069.77		15.4	-387.267	-630.833		15.4	-4658.64	-6608.36		15.4	-1246.45	-1045.99
15.5	6.83317	-3.41161	-1.11438	-1.11279		15.5	-4.67293	-1.54311	-2.47119	0.292185		15.5	-493.886	-493.823		15.5	-1720.77	-3013.23		15.5	-1633.79	-1086.9		15.5	-375.123	-634.569		15.5	-4607.89	-6684.96		15.5	-1244.89	-1060.93
15.6	2.47384	0.947983	-1.11432	-0.489944		15.6	-3.42754	-3.7227	2.82265	0.292093		15.6	-490.772	-495.068		15.6	-1700.84	-3028.8		15.6	-1638.15	-1098.73		15.6	-360.488	-642.042		15.6	-4554.02	-6709.87		15.6	-1253.3	-1075.57
15.7	1.22831	-1.23145	-2.98254	-1.11263		15.7	0.308868	-0.297451	0.0205884	2.16028		15.7	-489.527	-508.146		15.7	-1665.34	-3046.55		15.7	-1645.93	-1114.61		15.7	-343.674	-628.653		15.7	-4500.46	-6758.44		15.7	-1252.37	-1090.52
15.8	7.14455	-0.9198	-0.180054	-3.29222		15.8	1.86563	-2.78843	-2.15871	-0.642233		15.8	-477.072	-511.571		15.8	-1616.77	-3061.49		15.8	-1644.06	-1143.57		15.8	-324.057	-621.803		15.8	-4443.79	-6822.9		15.8	-1252.37	-1107.33
15.9	7.45593	-1.23094	-2.04828	0.755829		15.9	-3.11661	-3.41112	-2.15834	2.47148		15.9	-474.581	-529.632		15.9	-1565.7	-3074.26		15.9	-1651.54	-1155.71		15.9	-314.093	-614.018		15.9	-4397.71	-6845.94		15.9	-1246.14	-1125.7
16	7.14455	-0.919296	-4.22789	-1.73514		16	-5.29642	-0.92001	1.26721	2.78277		16	-474.581	-540.53		16	-1508.41	-3081.73		16	-1673.64	-1155.4		16	-307.554	-614.952		16	-4342.9	-6891.72		16	-1247.07	-1137.84
16.1	1.85108	-1.54181	-3.60506	-0.489532		16.1	2.17657	-4.03375	0.644818	1.53716		16.1	-467.73	-538.039		16.1	-1457.96	-3094.19		16.1	-1688.59	-1163.19		16.1	-300.703	-612.461		16.1	-4270.97	-6939.36		16.1	-1248.94	-1153.1
16.2	3.40798	-2.16432	-2.35948	-0.17807		16.2	-1.24876	-2.78816	-0.600337	3.09397		16.2	-463.371	-535.236		16.2	-1394.44	-3090.76		16.2	-1695.44	-1170.97		16.2	-288.248	-611.839		16.2	-4225.2	-6978.9		16.2	-1246.76	-1172.1
16.3	2.47384	-1.54131	-0.802521	-2.04628		16.3	-4.67409	-0.297047	-2.15687	2.78249		16.3	-450.916	-545.512		16.3	-1346.8	-3089.21		16.3	-1707.58	-1179.38		16.3	-278.907	-606.545		16.3	-4196.24	-7036.51		16.3	-1240.22	-1195.14
16.4	5.89902	-3.40933	-0.80246	-2.04619		16.4	-4.36285	-2.78802	-4.95893	3.09378		16.4	-435.658	-571.668		16.4	-1300.71	-3102.91		16.4	-1703.85	-1185.61		16.4	-266.14	-605.611		16.4	-4146.42	-7057.37		16.4	-1237.73	-1208.53
16.5	2.47384	-2.16357	-1.42516	-1.11197		16.5	1.86461	-1.23106	-1.53338	-0.954257		16.5	-431.299	-579.764		16.5	-1244.35	-3109.14		16.5	-1696.37	-1199		16.5	-257.421	-615.575		16.5	-4090.37	-7080.72		16.5	-1246.45	-1211.95
16.6	2.78522	-2.47469	1.68872	-1.11189		16.6	1.55309	-3.41065	-3.08991	-0.331587		16.6	-424.137	-588.794		16.6	-1210.1	-3116.92		16.6	-1697.93	-1184.05		16.6	-244.032	-611.839		16.6	-4042.42	-7107.81		16.6	-1239.6	-1230.32
16.7	2.16246	-1.5403	-1.73642	0.445099		16.7	3.10983	-1.23092	-1.22126	-0.331679		16.7	-426.628	-609.034		16.7	-1157.79	-3123.46		16.7	-1705.09	-1205.53		16.7	-242.475	-593.467		16.7	-4003.19	-7156.7		16.7	-1225.9	-1252.74
16.8	0.916935	-4.34247	-1.11359	-1.73448		16.8	0.307266	-4.96742	-2.46642	1.84789		16.8	-415.418	-618.375		16.8	-1107.04	-3141.21		16.8	-1709.76	-1216.12		16.8	-243.409	-592.844		16.8	-3955.86	-7192.51		16.8	-1223.72	-1260.84
16.9	-1.26273	-2.16257	-1.73628	-0.488892		16.9	9.02578	-3.09907	-1.53191	3.09332		16.9	-407.945	-618.064		16.9	-1062.82	-3137.78		16.9	-1715.99	-1222.35		16.9	-234.068	-590.976		16.9	-3889.53	-7215.86		16.9	-1223.41	-1272.36
17	-0.0172081	-0.294022	-1.11345	0.445343		17	7.46873	-4.6559	-4.64535	4.02737		17	-406.7	-617.13		17	-1017.05	-3145.88		17	-1718.79	-1232.31		17	-217.565	-591.287		17	-3843.45	-7237.97		17	-1217.18	-1288.86
17.1	-5.62206	-4.03033	-2.04753	-1.11148		17.1	0.61821	-3.72169	-2.46532	3.7159		17.1	-401.095	-615.261		17.1	-972.52	-3149.3		17.1	-1716.3	-1251		17.1	-206.978	-591.287		17.1	-3782.42	-7279.07		17.1	-1213.44	-1295.4
17.2	-4.9993	-3.40732	-1.42471	-0.177246		17.2	-1.25021	-1.54196	-2.77633	1.22476		17.2	-388.017	-625.537		17.2	-922.699	-3147.75		17.2	-1698.24	-1265.63		17.2	-207.912	-598.449		17.2	-3732.91	-7322.35		17.2	-1207.22	-1298.52
17.3	-5.93344	-0.293274	-1.11327	-1.4227		17.3	6.22278	-3.41018	-0.907678	2.47019		17.3	-373.382	-638.615		17.3	-881.908	-3152.42		17.3	-1694.51	-1271.55		17.3	-196.702	-596.892		17.3	-3721.08	-7329.21		17.3	-1198.19	-1307.86
17.4	-4.68792	-2.47267	2.31198	-1.42262		17.4	4.35434	-3.41011	-1.53007	3.40424		17.4	-362.795	-637.058		17.4	-844.542	-3158.02		17.4	-1697.93	-1278.4		17.4	-189.852	-592.533		17.4	-3696.17	-7333.88		17.4	-1193.52	-1326.85
17.5	0.294174	-4.96347	-1.73592	-1.11115		17.5	0.929016	-1.23038	-0.284182	2.78139		17.5	-358.124	-639.238		17.5	-793.787	-3160.2		17.5	-1700.42	-1280.89		17.5	-189.852	-599.383		17.5	-3631.4	-7360.65		17.5	-1196.32	-1343.67
17.6	-1.57411	-2.1608	-1.11308	-1.42245		17.6	1.55162	-1.54169	-1.84072	2.46992		17.6	-355.01	-643.597		17.6	-739.607	-3169.23		17.6	-1706.65	-1258.78		17.6	-187.672	-606.234		17.6	-3568.5	-7397.09		17.6	-1194.14	-1355.19
17.7	-0.0172081	-3.09468	-3.29269	0.445908		17.7	4.66528	-3.40991	-1.52897	4.64949		17.7	-349.717	-644.22		17.7	-705.044	-3173.9		17.7	-1696.37	-1271.24		17.7	-181.133	-593.156		17.7	-3492.52	-7425.42		17.7	-1193.2	-1371.69
17.8	1.22831	-2.78305	1.0667	-0.176758		17.8	2.17409	-5.27813	-2.15136	3.71526		17.8	-340.687	-645.465		17.8	-660.516	-3179.82		17.8	-1673.64	-1306.73		17.8	-180.199	-576.03		17.8	-3443.64	-7447.22		17.8	-1191.96	-1376.99
17.9	-0.951347	-1.84866	1.06676	-0.176682		17.9	4.66499	-2.47563	-2.151	3.71517		17.9	-326.986	-646.088		17.9	-634.36	-3177.95		17.9	-1665.55	-1300.82		17.9	-174.283	-564.82		17.9	-3410.63	-7446.91		17.9	-1182	-1383.84
18	2.47384	0.642639	0.444061	1.38029		18	4.66484	-4.96661	-2.77339	3.40369		18	-322.938	-654.807		18	-610.073	-3182		18	-1666.17	-1310.47		18	-171.792	-548.94		18	-3357.38	-7441.3		18	-1177.32	-1400.03
18.1	-1.57411	-3.71645	-0.490021	-0.176514		18.1	6.84438	-4.96654	-4.32993	5.27188		18.1	-315.777	-659.789		18.1	-587.653	-3186.05		18.1	-1665.24	-1317.63		18.1	-164.319	-553.299		18.1	-3284.21	-7470.57		18.1	-1165.8	-1400.03
18.2	-3.13101	-2.78204	-1.11272	-0.799194		18.2	6.53284	-2.47543	-0.904373	0.601082		18.2	-308.303	-662.28		18.2	-553.401	-3193.21		18.2	-1662.75	-1321.06		18.2	-164.319	-558.904		18.2	-3250.27	-7493.61		18.2	-1162.38	-1401.27
18.3	-5.31068	-1.53627	-0.178513	-2.97878		18.3	3.1075	-0.918461	-2.14953	-0.644532		18.3	-306.435	-663.214		18.3	-519.772	-3190.41		18.3	-1669.28	-1323.24		18.3	-168.678	-561.706		18.3	-3206.05	-7501.09		18.3	-1159.58	-1405.63
18.4	-8.42448	-2.47015	-1.42398	-1.11041		18.4	2.4846	-5.5891	-1.21502	1.22366		18.4	-306.746	-669.13		18.4	-499.844	-3197.88		18.4	-1650.91	-1328.84		18.4	-159.337	-555.79		18.4	-3148.76	-7525.06		18.4	-1151.79	-1417.15
18.5	-8.42448	-1.84715	-0.801163	1.06932		18.5	-0.317978	-7.14594	-2.46017	2.78047		18.5	-298.962	-670.687		18.5	-480.538	-3209.09		18.5	-1639.39	-1324.79		18.5	-159.025	-555.479		18.5	-3073.72	-7532.54		18.5	-1148.37	-1423.07
18.6	-7.17896	-1.84689	-2.35799	0.446655		18.6	3.10707	-8.3914	-4.32809	3.09176		18.6	-293.357	-685.01		18.6	-457.185	-3210.33		18.6	-1622.27	-1332.89		18.6	-156.223	-564.82		18.6	-3024.21	-7552.47		18.6	-1145.87	-1424.94
18.7	-7.49034	-3.09216	-0.489639	-1.73293		18.7	1.55002	-7.45719	-4.95048	2.15753		18.7	-288.375	-689.37		18.7	-421.687	-3202.24		18.7	-1614.17	-1343.79		18.7	-150.618	-568.245		18.7	-2964.42	-7565.54		18.7	-1141.83	-1431.17
18.8	-2.19687	-4.02605	-1.42372	-1.11009		18.8	-4.98911	-4.65469	-3.08183	3.09158		18.8	-275.297	-703.382		18.8	-403.939	-3205.04		18.8	-1611.37	-1337.56		18.8	-143.768	-552.988		18.8	-2913.98	-7562.12		18.8	-1142.76	-1437.7
18.9	-1.57411	-2.4689	-1.73505	1.06966		18.9	-2.49821	-1.22944	0.655101	-1.26784		18.9	-265.021	-705.873		18.9	-392.729	-3200.68		18.9	-1598.29	-1316.07		18.9	-142.833	-554.856		18.9	-2856.37	-7595.44		18.9	-1134.98	-1448.6
19	2.47384	-2.46864	1.06744	-0.798538		19	-0.318695	-5.90008	-1.21282	-0.0224137		19	-264.71	-699.023		19	-386.501	-3198.81		19	-1599.22	-1335.69		19	-142.211	-542.401		19	-2809.04	-7620.04		19	-1122.83	-1454.21
19.1	1.22831	-1.53426	-1.11215	-0.798447		19.1	3.10634	-1.85206	-3.39211	2.15716		19.1	-258.794	-686.879		19.1	-370.621	-3188.85		19.1	-1604.83	-1362.78		19.1	-141.277	-542.712		19.1	-2758.29	-7626.57		19.1	-1116.29	-1466.97
19.2	3.0966	-3.40228	-1.73486	-0.487		19.2	0.303757	-4.03166	-4.63727	2.77983		19.2	-256.926	-679.717		19.2	-351.315	-3181.06		19.2	-1587.39	-1365.27		19.2	-136.606	-536.796		19.2	-2699.13	-7628.44		19.2	-1108.51	-1472.27
19.3	2.78522	-4.0248	-2.04617	-1.10968		19.3	-0.00775146	-6.21126	-1.21171	3.71388		19.3	-257.548	-697.466		19.3	-342.908	-3173.59		19.3	-1574.31	-1371.19		19.3	-135.36	-543.335		19.3	-2627.2	-7655.84		19.3	-1102.28	-1490.95
19.4	-2.19687	-1.84488	-0.177826	2.3156		19.4	-0.31929	-4.96567	-0.588585	3.4024		19.4	-251.943	-711.478		19.4	-340.417	-3176.71		19.4	-1558.43	-1380.22		19.4	-131.935	-541.155		19.4	-2555.27	-7669.86		19.4	-1095.12	-1505.9
19.5	-3.44239	-4.33568	0.756378	-0.175369		19.5	-3.43323	-9.01355	-2.4565	3.09093		19.5	-244.159	-710.855		19.5	-326.094	-3179.82		19.5	-1559.06	-1387.69		19.5	-133.181	-536.484		19.5	-2515.41	-7675.77		19.5	-1091.07	-1503.09
19.6	1.22831	-3.08989	0.756439	-0.79805		19.6	-1.87648	-6.52244	-4.01304	2.77946		19.6	-236.997	-722.376		19.6	-325.159	-3185.42		19.6	-1566.22	-1390.81		19.6	-135.36	-529.634		19.6	-2466.21	-7692.28		19.6	-1080.48	-1508.39
19.7	-0.639969	-3.40103	-2.66869	-1.42073		19.7	-4.99042	-4.3427	1.90356	4.33627		19.7	-235.752	-712.412		19.7	-312.081	-3193.21		19.7	-1558.43	-1376.79		19.7	-130.69	-530.568		19.7	-2420.13	-7709.4		19.7	-1068.03	-1516.17
19.8	1.5397	-3.08939	-0.488968	-2.66617		19.8	-1.56538	-7.76782	-0.587116	5.5817		19.8	-229.213	-713.035		19.8	-292.153	-3178.26		19.8	-1548.78	-1386.45		19.8	-126.33	-533.371		19.8	-2374.67	-7713.45		19.8	-1060.87	-1525.83
19.9	0.916935	-2.15501	-1.42305	-1.73195		19.9	0.925507	-6.83362	-2.45503	1.53366		19.9	-226.099	-727.358		19.9	-276.584	-3170.17		19.9	-1541	-1383.02		19.9	-117.923	-532.436		19.9	-2319.86	-7720.92		19.9	-1057.13	-1529.87
20	3.71936	-1.53198	-0.800232	-0.174957		20	-3.43396	-9.01321	-3.38881	-2.51438		20	-220.494	-737.322		20	-277.207	-3176.71		20	-1525.74	-1375.86		20	-108.893	-527.143		20	-2233.92	-7740.54		20	-1043.74	-1527.38
20.1	0.916935	-2.77727	-0.177399	0.759262		20.1	-7.17068	-8.70176	-2.76568	0.599335		20.1	-217.692	-728.915		20.1	-269.734	-3182.93		20.1	-1515.46	-1386.13		20.1	-103.911	-520.915		20.1	-2144.87	-7736.18		20.1	-1039.69	-1526.45
20.2	5.89902	-2.15425	-0.488708	-0.486176		20.2	-5.30254	-7.45617	-2.45393	3.09029		20.2	-209.907	-724.244		20.2	-262.26	-3174.84		20.2	-1515.77	-1395.48		20.2	-99.2401	-516.245		20.2	-2091	-7755.8		20.2	-1038.45	-1530.5
20.3	5.89902	-2.46538	0.445496	-0.486099		20.3	-3.4344	-4.65368	-1.51942	3.0902		20.3	-208.35	-726.424		20.3	-245.135	-3169.23		20.3	-1516.71	-1407.31		20.3	-92.7011	-528.388		20.3	-2046.16	-7783.2		20.3	-1029.11	-1534.23
20.4	1.5397	-2.15375	1.69109	0.136749		20.4	0.613403	-7.45604	-0.896293	3.0901		20.4	-203.68	-720.819		20.4	-238.596	-3163.94		20.4	-1508.92	-1402.64		20.4	-88.0304	-527.766		20.4	-2027.17	-7807.49		20.4	-1004.2	-1527.07
20.5	-0.639969	-0.285217	-0.799911	1.07097		20.5	-5.61436	-2.47388	-1.51869	2.46725		20.5	-200.566	-723.622		20.5	-234.548	-3170.17		20.5	-1499.27	-1397.34		20.5	-89.8987	-515.622		20.5	-1993.23	-7819.01		20.5	-994.855	-1527.07
20.6	-4.68792	0.337814	0.134293	-0.174469		20.6	-9.03969	-4.3421	0.0385833	0.598876		20.6	-199.009	-726.113		20.6	-226.14	-3176.08		20.6	-1492.11	-1400.15		20.6	-85.8508	-511.885		20.6	-1938.42	-7824.92		20.6	-988.628	-1540.46
20.7	-3.44239	-1.84161	-1.11116	-0.485779		20.7	-7.17155	-5.89893	-2.14071	0.598783		20.7	-191.847	-729.227		20.7	-220.535	-3172.35		20.7	-1485.26	-1401.08		20.7	-85.8508	-509.394		20.7	-1864.94	-7813.09		20.7	-982.089	-1552.6
20.8	-0.0172081	-1.52997	-0.799728	-0.485687		20.8	-7.17171	-6.83301	-1.82897	1.22145		20.8	-190.602	-721.442		20.8	-219.29	-3185.11		20.8	-1479.65	-1389.87		20.8	-86.1621	-503.167		20.8	-1823.21	-7800.95		20.8	-969.322	-1556.65
20.9	4.6535	-2.46387	2.00276	2.00543		20.9	-7.7946	-7.14432	-1.51722	3.71241		20.9	-184.685	-718.017		20.9	-209.637	-3186.05		20.9	-1475.92	-1384.27		20.9	-78.0662	-502.233		20.9	-1767.47	-7790.67		20.9	-961.538	-1556.34
21	7.76731	-1.21811	-1.42236	-0.174133		21	-4.36957	-4.96459	-0.89409	2.46679		21	-181.26	-716.771		21	-206.523	-3173.28		21	-1486.82	-1404.19		21	-82.7369	-505.035		21	-1715.16	-7794.41		21	-946.28	-1559.45
21.1	4.03074	-1.84061	2.00288	-1.1082		21.1	-4.99246	-6.83281	1.59732	2.4667		21.1	-181.883	-715.526		21.1	-213.685	-3168.92		21.1	-1491.8	-1412.29		21.1	-79.9345	-495.694		21.1	-1667.52	-7797.21		21.1	-940.675	-1559.14
21.2	1.22831	-1.21761	-0.799484	1.38292		21.2	-5.304	-5.58722	-0.893355	2.15523		21.2	-179.392	-720.508		21.2	-210.26	-3160.51		21.2	-1474.67	-1417.58		21.2	-77.1321	-489.466		21.2	-1591.54	-7811.85		21.2	-926.974	-1563.81
21.3	3.0966	-4.01976	0.757492	1.07162		21.3	-3.12448	-9.6351	-2.13851	3.71204		21.3	-175.967	-730.472		21.3	-206.212	-3152.73		21.3	-1473.74	-1429.42		21.3	-80.2459	-498.185		21.3	-1550.75	-7816.83		21.3	-925.417	-1564.75
21.4	-0.328587	-0.905716	2.00307	2.31723		21.4	-4.37015	-9.94641	0.0415211	2.46642		21.4	-168.805	-725.49		21.4	-203.41	-3148.68		21.4	-1475.29	-1435.33		21.4	-73.7069	-505.035		21.4	-1513.08	-7814.02		21.4	-916.076	-1575.65
21.5	-0.328587	-1.8396	-1.11067	2.94006		21.5	-5.30443	-7.14392	0.0418887	3.40047		21.5	-166.314	-730.161		21.5	-197.493	-3164.25		21.5	-1463.15	-1428.79		21.5	-75.8866	-502.855		21.5	-1449.87	-7807.17		21.5	-904.555	-1591.53
21.6	3.0966	-3.08487	1.38043	1.07187		21.6	-0.633881	-5.27557	0.976398	3.089		21.6	-170.985	-718.64		21.6	-194.068	-3166.74		21.6	-1461.91	-1431.6		21.6	-76.198	-502.544		21.6	-1388.52	-7815.27		21.6	-897.393	-1600.56
21.7	-0.328587	-1.52771	0.44635	0.449188		21.7	0.922882	-7.45516	-3.07118	0.909245		21.7	-170.673	-713.346		21.7	-187.218	-3163.32		21.7	-1451.01	-1429.42		21.7	-69.0362	-509.083		21.7	-1324.69	-7834.58		21.7	-881.513	-1613.01
21.8	-1.26273	-3.08437	1.06917	1.38341		21.8	-3.43658	-7.14371	-0.268391	1.53191		21.8	-166.002	-715.214		21.8	-185.349	-3156.15		21.8	-1436.06	-1440.32		21.8	-68.4134	-510.64		21.8	-1262.73	-7833.33		21.8	-874.04	-1619.55
21.9	-2.19687	-1.52721	1.38063	0.449356		21.9	-4.99364	-5.89812	0.666118	0.59768		21.9	-164.446	-717.083		21.9	-174.451	-3148.37		21.9	-1418.31	-1435.33		21.9	-67.7907	-525.586		21.9	-1224.43	-7816.83		21.9	-864.698	-1615.5
22	-0.639969	-1.21559	1.38069	0.760818		22	-4.6824	-8.07772	0.666485	0.597588		22	-165.068	-714.28		22	-167.601	-3144.32		22	-1403.05	-1444.36		22	-69.659	-526.832		22	-1190.17	-7830.22		22	-862.519	-1610.83
22.1	-0.328587	-0.903946	1.69214	2.6292		22.1	-4.68256	-4.65247	3.1579	-0.648026		22.1	-162.266	-711.167		22.1	-161.373	-3137.78		22.1	-1415.2	-1450.28		22.1	-67.7907	-518.113		22.1	-1147.83	-7836.76		22.1	-861.273	-1613.63
22.2	-0.328587	-3.39474	-0.176086	0.138229		22.2	-2.19165	-8.38897	0.35584	2.77707		22.2	-161.954	-723.622		22.2	-168.224	-3139.03		22.2	-1416.76	-1435.96		22.2	-64.6769	-522.784		22.2	-1117	-7834.26		22.2	-852.554	-1616.75
22.3	0.916935	-1.83759	2.62639	0.761063		22.3	-7.79665	-9.63442	0.356207	4.0225		22.3	-162.889	-721.131		22.3	-171.026	-3146.19		22.3	-1416.13	-1428.48		22.3	-58.1379	-524.341		22.3	-1084.93	-7854.19		22.3	-849.441	-1623.91
22.4	-0.951347	-1.21458	-0.175964	0.449768		22.4	-9.04231	-5.27503	-0.577568	2.77689		22.4	-154.481	-714.592		22.4	-170.715	-3144.32		22.4	-1418.62	-1417.27		22.4	-58.4493	-515.933		22.4	-1044.14	-7870.7		22.4	-839.788	-1620.48
22.5	4.6535	-0.902939	2.31514	1.38399		22.5	-3.12624	-5.27496	0.356941	1.53127		22.5	-153.859	-714.903		22.5	-165.421	-3139.96		22.5	-1401.81	-1426.93		22.5	-58.7606	-508.46		22.5	-1008.95	-7859.8		22.5	-832.003	-1627.65
22.6	-3.75378	-0.902695	4.49486	1.69545		22.6	4.03537	-5.27489	-0.265453	2.7767		22.6	-153.859	-713.035		22.6	-166.667	-3122.52		22.6	-1390.6	-1430.97		22.6	-58.4493	-509.394		22.6	-976.568	-7839.25		22.6	-826.398	-1638.86
22.7	0.294174	-2.45934	2.00388	1.38416		22.7	1.2328	-6.52035	1.6032	1.53109		22.7	-148.877	-716.771		22.7	-166.044	-3111.63		22.7	-1398.69	-1415.72		22.7	-57.8265	-507.526		22.7	-928.926	-7828.04		22.7	-824.53	-1642.59
22.8	-3.44239	-1.52495	2.62669	2.94113		22.8	0.298508	-2.47233	1.29219	2.77652		22.8	-151.056	-706.807		22.8	-163.241	-3114.43		22.8	-1396.52	-1436.89		22.8	-56.8924	-514.688		22.8	-892.183	-7825.55		22.8	-808.65	-1642.9
22.9	3.0966	-0.590546	-0.487045	2.62985		22.9	0.609756	-6.20883	0.35841	4.64471		22.9	-151.056	-706.496		22.9	-158.259	-3107.27		22.9	-1389.66	-1442.49		22.9	-56.2696	-521.538		22.9	-879.728	-7815.89		22.9	-799.308	-1645.71
23	1.22831	-0.590302	2.9382	4.4982		23	4.96893	-8.38843	0.981539	2.77633		23	-148.877	-708.053		23	-147.672	-3099.17		23	-1386.24	-1431.6		23	-53.7786	-534.616		23	-852.95	-7795.03		23	-790.901	-1640.72
23.1	-3.13101	-1.83557	2.93826	2.00723		23.1	-1.88158	-4.34041	0.0477643	1.53072		23.1	-146.697	-697.777		23.1	-145.804	-3083.91		23.1	-1380.32	-1430.04		23.1	-54.4013	-541.778		23.1	-828.662	-7799.08		23.1	-780.314	-1644.15
23.2	-4.06516	-1.83533	2.62694	2.00732		23.2	0.297928	-5.58587	0.359512	0.285104		23.2	-143.894	-700.58		23.2	-141.445	-3087.65		23.2	-1379.39	-1455.88		23.2	-47.8623	-535.55		23.2	-822.746	-7791.29		23.2	-775.643	-1639.79
23.3	-0.328587	-3.08058	1.0701	2.0074		23.3	0.920547	-4.34028	1.29402	4.02158		23.3	-142.026	-711.167		23.3	-135.84	-3080.49		23.3	-1376.59	-1453.08		23.3	-49.4192	-533.993		23.3	-805.62	-7773.55		23.3	-768.17	-1633.56
23.4	0.605553	-0.589294	-1.1095	0.450577		23.4	0.297638	-8.69954	3.47405	2.1532		23.4	-137.355	-713.658		23.4	-131.792	-3076.13		23.4	-1364.13	-1429.73		23.4	-47.5509	-530.257		23.4	-769.811	-7763.27		23.4	-764.434	-1633.56
23.5	-0.0172081	-0.589035	2.00438	2.00757		23.5	-1.25941	-6.20843	0.0492334	2.15311		23.5	-139.535	-705.562		23.5	-129.301	-3079.55		23.5	-1355.1	-1436.89		23.5	-47.8623	-520.293		23.5	-724.349	-7769.81		23.5	-754.158	-1637.92
23.6	0.294174	-2.14571	-1.10936	2.63042		23.6	-0.948166	-8.69941	0.360981	2.15302		23.6	-134.553	-701.514		23.6	-124.63	-3076.75		23.6	-1359.46	-1442.81		23.6	-44.1258	-522.161		23.6	-709.403	-7764.2		23.6	-750.422	-1644.46
23.7	0.605553	-2.45682	2.62726	0.762207		23.7	-1.57108	-0.603441	0.0499678	0.284645		23.7	-131.751	-690.304		23.7	-119.96	-3081.73		23.7	-1356.66	-1438.76		23.7	-43.503	-518.113		23.7	-693.523	-7777.28		23.7	-742.014	-1644.15
23.8	0.916935	0.345856	1.07042	2.63058		23.8	-4.06227	-8.07651	1.29586	1.53008		23.8	-134.553	-684.388		23.8	-119.648	-3073.02		23.8	-1351.68	-1440.94		23.8	-48.1737	-504.724		23.8	-664.876	-7767.01		23.8	-732.05	-1651.31
23.9	-3.75378	0.968872	2.62738	1.69652		23.9	-2.81689	-6.51954	2.85313	3.08689		23.9	-128.325	-687.19		23.9	-120.271	-3069.59		23.9	-1332.68	-1432.84		23.9	-44.7485	-497.873		23.9	-649.307	-7750.5		23.9	-728.936	-1660.34
24	-4.06516	0.65773	1.69331	1.69661		24	-0.948746	-6.51947	0.673831	0.595749		24	-121.475	-687.19		24	-121.205	-3058.38		24	-1329.57	-1437.51		24	-42.2575	-499.119		24	-631.869	-7756.73		24	-726.445	-1655.98
24.1	-2.50825	-0.276154	3.87303	-0.794357		24.1	-4.68547	-4.9625	-0.259944	-0.0271034		24.1	-121.164	-679.094		24.1	-119.025	-3051.22		24.1	-1331.13	-1450.28		24.1	-43.8144	-502.233		24.1	-601.354	-7765.14		24.1	-717.727	-1653.18
24.2	-2.19687	1.59238	2.93895	0.451233		24.2	-1.88319	-3.09415	0.674565	0.906946		24.2	-120.852	-689.37		24.2	-115.6	-3066.48		24.2	-1340.78	-1462.11		24.2	-47.5509	-509.083		24.2	-587.03	-7771.99		24.2	-706.517	-1660.96
24.3	-1.57411	-0.587021	0.759354	1.69685		24.3	3.72151	-2.47132	0.986313	3.08652		24.3	-117.738	-705.25		24.3	-120.582	-3057.45		24.3	-1332.37	-1445.92		24.3	-50.042	-509.394		24.3	-570.527	-7768.56		24.3	-690.636	-1661.59
24.4	-1.57411	0.0359802	3.25046	0.762787		24.4	-0.0151978	-3.4054	1.60944	0.595381		24.4	-121.164	-724.244		24.4	-117.78	-3049.35		24.4	-1322.1	-1445.61		24.4	-43.1916	-511.263		24.4	-552.779	-7743.65		24.4	-691.882	-1666.57
24.5	-0.0172081	-1.20929	2.00499	2.31976		24.5	-1.88362	-2.78257	1.60981	-1.27299		24.5	-122.721	-718.64		24.5	-118.714	-3034.72		24.5	-1316.18	-1443.12		24.5	-41.3233	-516.867		24.5	-544.371	-7734.62		24.5	-679.115	-1666.88
24.6	-1.26273	0.970627	0.448151	1.07433		24.6	-1.57239	-5.89631	1.61018	-0.961706		24.6	-122.721	-709.921		24.6	-116.223	-3029.42		24.6	-1316.8	-1437.82		24.6	-41.3233	-517.179		24.6	-532.539	-7719.68		24.6	-670.708	-1667.19
24.7	1.85108	-1.83154	0.759598	2.94269		24.7	-2.50667	-6.20762	0.676401	-0.339036		24.7	-122.098	-704.005		24.7	-110.307	-3032.22		24.7	-1309.64	-1431.29		24.7	-45.6827	-516.245		24.7	-521.329	-7700.68		24.7	-666.971	-1669.37
24.8	1.85108	0.659744	1.6938	4.81107		24.8	-0.949921	-3.71651	2.85643	-1.27327		24.8	-118.361	-702.136		24.8	-109.061	-3039.07		24.8	-1306.53	-1425.68		24.8	-39.7664	-514.688		24.8	-518.527	-7691.96		24.8	-661.989	-1665.32
24.9	0.916935	-0.58551	2.62799	3.25424		24.9	-3.75249	-7.14163	0.677135	0.283541		24.9	-114.002	-696.843		24.9	-106.57	-3034.72		24.9	-1299.05	-1432.22		24.9	-40.7006	-508.771		24.9	-507.628	-7693.52		24.9	-659.81	-1659.41
25	2.47384	-0.273895	1.07115	1.69742		25	2.47498	-7.14156	3.16855	-0.0279312		25	-112.756	-697.466		25	-108.75	-3023.19		25	-1302.17	-1436.58		25	-43.1916	-515.622		25	-488.323	-7689.78		25	-650.78	-1663.77
25.1	-0.328587	0.0377502	1.07121	2.00888		25.1	-1.88451	-5.89597	6.5941	1.2175		25.1	-109.643	-698.089		25.1	-107.816	-3021.95		25.1	-1305.9	-1439.07		25.1	-41.9461	-520.604		25.1	-469.951	-7673.59		25.1	-644.552	-1660.96
25.2	-3.13101	0.0379944	-0.174225	2.00896		25.2	-4.06432	-5.27314	0.678237	0.594646		25.2	-111.511	-698.089		25.2	-109.684	-3024.44		25.2	-1303.72	-1422.57		25.2	-42.5688	-511.885		25.2	-458.742	-7668.61		25.2	-632.097	-1660.65
25.3	-1.57411	-0.895889	1.69412	3.25456		25.3	-1.8848	-4.96169	2.54689	2.15146		25.3	-110.577	-694.663		25.3	-109.373	-3023.19		25.3	-1296.25	-1412.91		25.3	-40.3892	-502.233		25.3	-449.712	-7678.89		25.3	-626.492	-1656.6
25.4	0.294174	-0.272888	1.3828	2.32051		25.4	5.27682	-3.7161	3.79278	0.905843		25.4	-108.708	-697.466		25.4	-108.127	-3016.97		25.4	-1275.7	-1411.36		25.4	-38.2095	-500.987		25.4	-443.484	-7666.43		25.4	-624.624	-1652.25
25.5	-2.81963	2.5298	2.62837	0.763687		25.5	4.34253	-5.8957	-0.877564	-0.0283909		25.5	-110.888	-703.693		25.5	-106.259	-3022.88		25.5	-1272.59	-1428.17		25.5	-37.2754	-505.658		25.5	-421.999	-7660.51		25.5	-622.133	-1647.57
25.6	-4.9993	0.661758	2.62843	1.07513		25.6	1.22858	-5.89563	-0.877197	0.282897		25.6	-109.02	-716.771		25.6	-112.798	-3020.39		25.6	-1263.56	-1427.55		25.6	-40.7006	-503.478		25.6	-420.13	-7656.16		25.6	-617.462	-1652.25
25.7	1.5397	-0.272125	3.25127	2.63214		25.7	3.09671	-8.38661	0.368693	-1.58548		25.7	-109.643	-722.999		25.7	-110.307	-3021.33		25.7	-1278.5	-1420.39		25.7	-37.8981	-495.694		25.7	-412.657	-7667.99		25.7	-610.3	-1653.49
25.8	-2.81963	1.59641	2.62856	2.94359		25.8	2.47382	-6.82964	0.369061	1.52824		25.8	-111.199	-722.065		25.8	-109.995	-3012.92		25.8	-1264.49	-1429.11		25.8	-35.7185	-501.61		25.8	-406.741	-7665.81		25.8	-603.138	-1653.18
25.9	1.5397	-1.20576	0.448959	3.25507		25.9	3.40781	-2.78162	1.92633	2.15091		25.9	-108.086	-726.113		25.9	-115.289	-3006.07		25.9	-1251.72	-1435.96		25.9	-32.6047	-497.25		25.9	-416.705	-7648.06		25.9	-604.073	-1666.26
26	-2.81963	-0.582748	2.94006	3.25514		26	-1.26306	-4.64984	-0.875728	-1.27437		26	-102.481	-723.933		26	-117.468	-2992.37		26	-1257.02	-1427.24		26	-29.8022	-498.807		26	-412.657	-7626.57		26	-600.647	-1673.11
26.1	-1.57411	0.351654	2.62874	4.18936		26.1	-0.951813	-5.27254	0.0587816	-0.651704		26.1	-108.708	-723.31		26.1	-109.684	-2977.11		26.1	-1259.51	-1421.63		26.1	-27.6226	-501.61		26.1	-395.843	-7617.86		26.1	-597.222	-1675.29
26.2	-0.951347	-1.82777	1.69467	1.07564		26.2	-1.26335	-3.0928	-0.252232	-0.340415		26.2	-110.265	-720.197		26.2	-102.211	-2981.78		26.2	-1235.53	-1427.55		26.2	-31.6705	-497.562		26.2	-389.615	-7621.28		26.2	-595.665	-1672.8
26.3	-2.50825	1.59767	2.0061	1.3871		26.3	-0.0179596	-3.7155	1.61642	0.905015		26.3	-108.708	-712.101		26.3	-98.4743	-2976.18		26.3	-1219.34	-1429.73		26.3	-34.7843	-500.364		26.3	-389.615	-7607.58		26.3	-588.192	-1670.62
26.4	-1.26273	-1.20451	-0.173492	3.56685		26.4	1.85017	-1.84715	3.17369	-0.65198		26.4	-103.104	-707.119		26.4	-98.4743	-2967.77		26.4	-1216.85	-1442.81		26.4	-31.3591	-502.855		26.4	-386.19	-7591.08		26.4	-586.324	-1668.44
26.5	-2.19687	-1.51562	2.00623	1.38727		26.5	4.65245	0.643967	2.86268	-0.340691		26.5	-98.7442	-708.053		26.5	-99.097	-2964.97		26.5	-1218.41	-1449.97		26.5	-32.2933	-497.562		26.5	-377.16	-7594.81		26.5	-582.276	-1662.52
26.6	-10.2928	0.975662	-3.59856	1.69873		26.6	1.5385	-2.46977	0.683379	-0.652164		26.6	-97.8101	-704.939		26.6	-100.031	-2977.42		26.6	-1227.12	-1437.51		26.6	-31.9819	-486.663		26.6	-375.914	-7609.76		26.6	-574.18	-1672.17
26.7	-8.73587	1.91006	-1.10745	0.764664		26.7	3.40665	-3.40385	0.0609851	-0.0294943		26.7	-95.0077	-699.957		26.7	-103.456	-2968.08		26.7	-1230.55	-1435.64		26.7	-26.0657	-489.466		26.7	-373.423	-7614.43		26.7	-569.198	-1684.01
26.8	-1.26273	1.59892	2.00642	0.453369		26.8	-3.44388	-1.84688	0.995494	0.593174		26.8	-90.6483	-707.741		26.8	-104.702	-2954.38		26.8	-1219.03	-1421.94		26.8	-17.9698	-490.089		26.8	-374.357	-7620.04		26.8	-561.102	-1668.44
26.9	4.96488	2.53333	1.38373	2.63312		26.9	-1.57574	-2.78095	2.86414	-1.2752		26.9	-95.319	-710.544		26.9	-102.834	-2962.16		26.9	-1222.14	-1415.72		26.9	-20.4608	-489.155		26.9	-366.262	-7592.94		26.9	-557.054	-1663.77
27	3.0966	2.53357	-0.173111	1.38768		27	-0.330368	-4.96055	3.17589	-2.20943		27	-97.8101	-707.119		27	-111.241	-2956.56		27	-1230.24	-1433.46		27	-17.9698	-479.19		27	-352.872	-7579.56		27	-553.629	-1658.16
27.1	6.2104	1.2883	0.761093	2.63329		27.1	0.915009	-3.40358	3.17626	-1.27538		27.1	-94.0735	-709.298		27.1	-108.438	-2958.74		27.1	-1214.67	-1433.15		27.1	-21.0836	-481.681		27.1	-336.058	-7577.38		27.1	-554.252	-1654.11
27.2	4.96488	1.28856	2.31805	2.32198		27.2	0.603485	-5.58318	1.61972	0.281426		27.2	-87.2231	-713.658		27.2	-105.636	-2969.01		27.2	-1195.05	-1435.64		27.2	-17.9698	-477.945		27.2	-332.321	-7584.54		27.2	-544.91	-1661.9
27.3	-0.328587	0.977417	2.00673	-1.41451		27.3	3.09438	-1.84654	0.685949	-1.27557		27.3	-90.6483	-718.64		27.3	-110.618	-2966.83		27.3	-1189.14	-1429.73		27.3	-17.347	-472.963		27.3	-328.585	-7575.2		27.3	-541.797	-1662.83
27.4	0.916935	0.0435333	-0.795639	0.453857		27.4	-0.330948	-2.46923	-2.11611	0.281242		27.4	-89.0914	-710.232		27.4	-111.241	-2965.9		27.4	-1182.6	-1412.29		27.4	-20.4608	-479.19		27.4	-328.585	-7567.41		27.4	-538.371	-1666.57
27.5	3.40798	-1.51312	-1.10695	2.63361		27.5	1.84857	-4.96021	-0.870219	0.903912		27.5	-87.2231	-709.61		27.5	-110.618	-2964.03		27.5	-1179.17	-1419.76		27.5	-19.2153	-486.975		27.5	-322.98	-7569.59		27.5	-536.503	-1664.08
27.6	4.03074	1.91232	2.94106	0.454025		27.6	6.20775	-8.07395	1.62119	-2.83275		27.6	-83.798	-710.855		27.6	-108.127	-2955		27.6	-1186.96	-1424.75		27.6	-19.2153	-478.879		27.6	-309.902	-7561.5		27.6	-527.162	-1665.32
27.7	4.6535	0.667038	2.31836	2.011		27.7	5.89622	-5.89422	0.687418	-1.27594		27.7	-84.1093	-708.987		27.7	-102.211	-2950.95		27.7	-1182.91	-1419.45		27.7	-17.347	-475.454		27.7	-300.56	-7537.21		27.7	-522.491	-1669.37
27.8	5.58764	0.355927	-0.172623	1.69972		27.8	4.96193	-3.09173	0.999166	-1.27603		27.8	-80.0614	-714.28		27.8	-101.588	-2952.51		27.8	-1181.35	-1429.42		27.8	-15.1674	-477.633		27.8	-299.315	-7521.02		27.8	-521.245	-1665.32
27.9	5.89902	0.978928	0.761581	-0.479874		27.9	3.09351	-6.20547	1.31091	1.52631		27.9	-81.6183	-712.412		27.9	-100.965	-2950.95		27.9	-1182.29	-1429.73		27.9	-17.9698	-479.502		27.9	-299.003	-7521.64		27.9	-517.509	-1658.47
28	4.34212	-0.266342	0.450256	1.0771		28	-0.643219	-4.95987	0.37714	0.903452		28	-84.1093	-716.149		28	-97.5401	-2949.71		28	-1193.18	-1431.29		28	-19.2153	-472.34		28	-292.464	-7541.26		28	-512.215	-1662.21
28.1	4.96488	-1.51161	-0.483826	2.32272		28.1	2.78185	-2.78014	2.55717	-2.83321		28.1	-77.8817	-717.706		28.1	-93.1808	-2948.77		28.1	-1192.56	-1423.5		28.1	-19.2153	-458.016		28.1	-284.057	-7540.01		28.1	-517.509	-1676.84
28.2	1.85108	2.53659	1.69591	1.07727		28.2	5.27274	-3.09146	0.689255	-1.2764		28.2	-80.9955	-715.214		28.2	-91.0011	-2953.45		28.2	-1190.07	-1411.05		28.2	-16.1015	-454.903		28.2	-276.895	-7519.46		28.2	-511.281	-1681.2
28.3	4.96488	1.91408	1.0732	1.07735		28.3	4.96121	-2.15725	0.378242	5.2625		28.3	-84.7321	-700.58		28.3	-92.558	-2958.12		28.3	-1182.91	-1420.39		28.3	-11.7422	-463.933		28.3	-270.979	-7497.66		28.3	-502.563	-1686.19
28.4	3.40798	-0.265335	1.07326	2.94572		28.4	2.7814	-3.71408	0.0672283	3.08275		28.4	-83.4866	-685.322		28.4	-97.8515	-2949.09		28.4	-1184.47	-1440		28.4	-18.2812	-475.142		28.4	-263.817	-7495.17		28.4	-497.892	-1689.92
28.5	0.916935	2.22595	0.450577	1.07751		28.5	-0.332565	-3.40264	0.378976	2.14851		28.5	-77.259	-679.094		28.5	-96.2946	-2946.91		28.5	-1178.86	-1429.73		28.5	-17.6584	-469.226		28.5	-261.638	-7505.14		28.5	-495.089	-1683.07
28.6	0.294174	0.669312	1.07339	0.76622		28.6	0.290054	-1.84566	3.49315	-0.342622		28.6	-78.1931	-679.717		28.6	-93.8036	-2950.95		28.6	-1161.11	-1430.35		28.6	-17.9698	-457.705		28.6	-265.686	-7497.35		28.6	-490.73	-1685.87
28.7	1.22831	1.6037	0.450699	0.766312		28.7	1.53543	-2.46836	3.8049	-0.342714		28.7	-77.5703	-679.717		28.7	-99.4084	-2957.8		28.7	-1156.44	-1432.84		28.7	-20.4608	-452.723		28.7	-271.602	-7495.17		28.7	-481.077	-1682.76
28.8	3.40798	1.91534	1.69629	2.0119		28.8	0.289764	0.0227547	2.55974	-0.965568		28.8	-72.8996	-675.046		28.8	-93.4922	-2947.84		28.8	-1156.44	-1415.72		28.8	-22.6405	-453.346		28.8	-270.356	-7501.09		28.8	-475.784	-1674.35
28.9	5.27626	1.6042	2.00772	1.38924		28.9	0.289612	-3.09098	-2.42198	4.01643		28.9	-70.72	-681.585		28.9	-97.8515	-2946.59		28.9	-1155.82	-1427.86		28.9	-22.6405	-453.657		28.9	-272.536	-7514.79		28.9	-477.029	-1674.04
29	7.14455	3.47275	-0.483261	0.45517		29	-0.0218964	-2.15677	-0.241949	-0.34299		29	-72.2769	-674.735		29	-100.031	-2943.79		29	-1157.06	-1423.81		29	-23.2632	-461.13		29	-264.752	-7504.2		29	-467.377	-1681.2
29.1	7.14455	1.91609	-0.4832	0.766632		29.1	-0.333435	-7.45018	1.31532	-0.965844		29.1	-72.5883	-674.735		29.1	-93.1808	-2927.29		29.1	-1153.95	-1417.58		29.1	-21.395	-477.011		29.1	-259.769	-7502.64		29.1	-460.526	-1691.17
29.2	6.2104	4.40739	1.38515	1.07809		29.2	-4.38152	-3.71354	1.93845	0.590968		29.2	-75.3907	-678.783		29.2	-90.067	-2911.72		29.2	-1134.96	-1412.29		29.2	-25.7543	-469.226		29.2	-259.458	-7509.81		29.2	-458.035	-1688.68
29.3	4.03074	1.60521	1.69659	0.144043		29.3	-0.333725	-1.84519	0.693294	-0.0318851		29.3	-80.3728	-677.537		29.3	-91.9353	-2919.19		29.3	-1134.96	-1419.76		29.3	-21.395	-453.657		29.3	-260.081	-7509.81		29.3	-462.083	-1688.99
29.4	5.58764	0.982712	1.69666	0.766876		29.4	-1.89078	-4.02479	-1.79738	0.590784		29.4	-78.5045	-678.783		29.4	-93.4922	-2926.04		29.4	-1143.99	-1411.98		29.4	-16.1015	-442.447		29.4	-246.38	-7491.75		29.4	-459.903	-1686.81
29.5	7.76731	3.16261	1.38533	-0.478561		29.5	-5.3161	0.334606	0.694029	0.590692		29.5	-74.7679	-676.915		29.5	-90.6898	-2922		29.5	-1133.71	-1402.64		29.5	-18.9039	-436.843		29.5	-241.398	-7485.83		29.5	-462.706	-1685.56
29.6	5.89902	1.2946	3.56505	-0.478485		29.6	-0.956924	-4.64742	2.2513	-1.90045		29.6	-76.9476	-667.573		29.6	-88.8215	-2913.59		29.6	-1137.45	-1399.84		29.6	-22.3291	-433.417		29.6	-238.596	-7487.08		29.6	-461.46	-1692.41
29.7	0.605553	1.29485	1.69684	0.767136		29.7	-3.75949	-4.33597	0.383383	-0.655015		29.7	-74.1452	-675.046		29.7	-83.528	-2919.5		29.7	-1138.07	-1394.54		29.7	-22.3291	-437.154		29.7	-241.709	-7500.46		29.7	-459.903	-1694.28
29.8	1.85108	0.672333	2.00827	0.144455		29.8	-4.07103	-3.40176	-0.550392	-0.0323448		29.8	-71.6541	-675.046		29.8	-84.1508	-2927.91		29.8	-1131.53	-1394.23		29.8	-23.886	-449.921		29.8	-240.464	-7487.08		29.8	-449.316	-1697.4
29.9	-3.75378	1.91811	0.762817	0.767288		29.9	4.64749	-2.46755	0.0727367	2.45861		29.9	-73.211	-667.262		29.9	-82.5938	-2916.39		29.9	-1130.28	-1391.12		29.9	-18.9039	-453.657		29.9	-239.53	-7458.12		29.9	-445.891	-1696.46
30	1.85108	5.03217	1.38564	1.07875		30	1.84492	-5.26991	0.695865	2.45852		30	-70.72	-674.112		30	-81.9711	-2901.44		30	-1135.58	-1389.87		30	-21.395	-452.723		30	-245.446	-7440.68		30	-449.005	-1697.4
30.1	0.916935	1.29585	-0.793961	-0.789444		30.1	1.5334	-4.64708	-0.237909	-0.0326209		30.1	-69.1631	-673.489		30.1	-78.5459	-2892.41		30.1	-1131.84	-1387.69		30.1	-20.7722	-456.148		30.1	-240.775	-7437.57		30.1	-446.514	-1693.04
30.2	3.0966	0.984726	2.00853	-1.10075		30.2	-0.0236511	2.20336	1.00798	0.278667		30.2	-70.0972	-685.322		30.2	-77.9231	-2892.41		30.2	-1133.71	-1382.71		30.2	-19.2153	-467.358		30.2	-231.434	-7448.46		30.2	-444.334	-1684.63
30.3	2.47384	0.673584	2.00859	2.63591		30.3	-1.26933	-2.77866	1.00835	-0.344185		30.3	-70.72	-686.256		30.3	-80.1028	-2886.19		30.3	-1124.06	-1390.49		30.3	-19.2153	-474.831		30.3	-223.649	-7444.42		30.3	-444.957	-1688.05
30.4	1.22831	-0.571671	-0.171005	1.39046		30.4	2.15572	-4.64688	0.385953	0.901245		30.4	-70.4086	-674.424		30.4	-77.3004	-2877.78		30.4	-1118.76	-1394.23		30.4	-25.1315	-466.735		30.4	-227.697	-7433.52		30.4	-439.975	-1685.25
30.5	0.916935	0.674088	0.451813	-1.10051		30.5	0.287277	-5.89233	0.386321	-0.0329885		30.5	-66.672	-678.783		30.5	-85.0849	-2884.01		30.5	-1131.22	-1383.02		30.5	-22.3291	-458.639		30.5	-223.338	-7435.39		30.5	-435.304	-1686.5
30.6	-0.951347	-1.50531	-0.793655	-1.10042		30.6	-6.56323	-5.58089	1.32083	-0.655842		30.6	-67.2948	-661.346		30.6	-87.5759	-2891.79		30.6	-1132.46	-1396.72		30.6	-22.9519	-460.196		30.6	-219.601	-7445.04		30.6	-433.747	-1692.73
30.7	-2.81963	0.36322	0.451935	-1.10034		30.7	-2.82681	-3.40115	-0.235706	-1.2787		30.7	-70.4086	-659.477		30.7	-85.7077	-2887.12		30.7	-1135.27	-1392.67		30.7	-21.395	-452.1		30.7	-217.733	-7425.11		30.7	-432.813	-1679.02
30.8	-2.19687	0.67485	0.763382	-0.166107		30.8	-0.335907	-3.0897	0.387423	0.278116		30.8	-72.5883	-657.92		30.8	-84.4621	-2893.04		30.8	-1127.48	-1388		30.8	-22.6405	-443.382		30.8	-214.931	-7400.2		30.8	-430.634	-1671.24
30.9	-1.88549	0.363724	-1.41623	-2.03432		30.9	-0.33606	-5.89206	1.01055	2.45769		30.9	-74.7679	-647.956		30.9	-79.48	-2888.37		30.9	-1129.66	-1372.75		30.9	-22.0177	-451.789		30.9	-212.128	-7405.81		30.9	-434.993	-1671.55
31	1.22831	0.052597	1.07487	-1.72285		31	2.46622	-4.95785	-0.545985	0.277932		31	-74.1452	-641.106		31	-81.0369	-2884.94		31	-1131.53	-1382.71		31	-18.5925	-462.687		31	-219.913	-7403.94		31	-428.143	-1668.13
31.1	2.47384	-0.881302	-0.170578	-0.165863		31.1	-3.13878	-5.26917	0.0771437	1.52336		31.1	-69.4744	-643.908		31.1	-81.3483	-2871.86		31.1	-1142.12	-1384.89		31.1	-17.6584	-468.603		31.1	-236.416	-7384.32		31.1	-423.472	-1668.75
31.2	5.27626	3.78967	-1.72743	-2.34546		31.2	-4.38445	-6.826	0.700272	-0.967774		31.2	-68.5403	-640.483		31.2	-77.3004	-2874.04		31.2	-1135.58	-1391.43		31.2	-18.2812	-460.196		31.2	-241.709	-7387.12		31.2	-422.538	-1653.8
31.3	4.6535	0.987488	0.452301	-1.09985		31.3	-3.76183	-6.51455	0.389259	-0.345105		31.3	-65.7379	-626.471		31.3	-70.1386	-2886.81		31.3	-1115.03	-1384.89		31.3	-19.2153	-459.885		31.3	-235.793	-7377.47		31.3	-414.13	-1659.41
31.4	5.27626	0.676361	-0.793167	0.768524		31.4	-0.959549	-5.58035	0.701006	-1.9021		31.4	-64.181	-639.238		31.4	-71.6955	-2887.43		31.4	-1108.18	-1390.49		31.4	-25.1315	-456.148		31.4	-236.416	-7364.08		31.4	-412.262	-1674.35
31.5	7.14455	2.85628	2.00932	-2.34521		31.5	-2.82797	-5.89166	-0.232768	0.588852		31.5	-63.8696	-639.549		31.5	-75.7435	-2888.06		31.5	-1115.96	-1396.1		31.5	-19.8381	-453.034		31.5	-241.087	-7354.74		31.5	-410.705	-1671.55
31.6	3.71936	0.988251	-1.4158	-1.41098		31.6	-5.63055	-3.71193	0.07898	2.14566		31.6	-67.9175	-643.286		31.6	-78.8573	-2883.07		31.6	-1120.94	-1387.07		31.6	-19.5267	-455.214		31.6	-243.578	-7355.36		31.6	-411.017	-1674.04
31.7	2.16246	-0.257034	0.763931	-1.09952		31.7	-2.51688	-3.40048	-0.232034	1.21143		31.7	-65.4265	-644.842		31.7	-75.7435	-2877.78		31.7	-1113.78	-1369.32		31.7	-17.347	-464.555		31.7	-243.578	-7354.43		31.7	-406.657	-1667.81
31.8	4.03074	-1.19092	-0.481522	0.457458		31.8	-0.960129	-7.75974	0.391095	2.14548		31.8	-66.672	-644.842		31.8	-78.5459	-2880.58		31.8	-1118.45	-1378.66		31.8	-14.2332	-468.603		31.8	-245.135	-7356.61		31.8	-406.969	-1663.46
31.9	2.47384	3.48004	-0.792847	-1.72211		31.9	-5.631	-4.33448	-1.7882	-0.345656		31.9	-67.2948	-639.549		31.9	-80.7256	-2872.17		31.9	-1113.78	-1373.68		31.9	-15.1674	-462.376		31.9	-249.494	-7357.54		31.9	-412.262	-1662.21
32	1.85108	0.677872	-0.792786	-0.787888		32	-2.20595	-0.909231	-1.78784	0.899774		32	-66.3606	-634.567		32	-81.9711	-2872.8		32	-1103.19	-1378.97		32	-15.1674	-465.49		32	-256.344	-7364.08		32	-412.262	-1664.7
32.1	-0.328587	-0.878784	-0.169952	-0.787811		32.1	-3.45161	-5.26849	-1.16471	1.21106		32.1	-67.9175	-642.351		32.1	-79.1687	-2864.08		32.1	-1104.75	-1401.39		32.1	-15.7901	-462.999		32.1	-251.674	-7353.18		32.1	-408.837	-1673.42
32.2	1.5397	2.85805	-1.10403	-1.09911		32.2	-5.63142	-4.95704	-0.541578	-1.59146		32.2	-66.0493	-645.777		32.2	-80.4142	-2855.05		32.2	-1104.13	-1396.1		32.2	-17.0356	-456.46		32.2	-229.877	-7329.21		32.2	-408.526	-1671.55
32.3	-2.50825	1.92415	0.452927	-0.164886		32.3	-2.51776	-2.46593	-0.22983	-4.08259		32.3	-62.3127	-657.298		32.3	-78.5459	-2849.76		32.3	-1110.05	-1399.21		32.3	-17.6584	-459.262		32.3	-214.931	-7336.37		32.3	-408.526	-1672.8
32.4	-0.639969	0.678879	0.452988	-2.65585		32.4	-0.338242	-0.908962	-0.852224	-0.968878		32.4	-63.5582	-655.429		32.4	-71.3841	-2849.13		32.4	-1094.79	-1397.34		32.4	-19.8381	-462.064		32.4	-213.685	-7335.43		32.4	-410.705	-1682.76
32.5	1.85108	-0.25502	1.38719	-0.164719		32.5	2.46404	-3.39994	-0.229095	-0.0348277		32.5	-64.181	-645.154		32.5	-69.8272	-2857.23		32.5	-1093.23	-1392.05		32.5	-19.8381	-458.639		32.5	-217.422	-7317.37		32.5	-404.166	-1689.3
32.6	5.58764	-1.50027	0.764496	-2.96707		32.6	-2.51819	-0.908827	0.394033	-0.657681		32.6	-66.672	-637.369		32.6	-69.8272	-2863.46		32.6	-1103.51	-1375.24		32.6	-18.9039	-453.034		32.6	-216.488	-7318		32.6	-398.561	-1688.68
32.7	10.8811	0.991013	0.453171	-2.34422		32.7	-0.961441	-2.15428	-0.539742	1.52189		32.7	-68.8517	-630.208		32.7	-66.0907	-2860.03		32.7	-1115.96	-1385.51		32.7	-19.2153	-456.771		32.7	-207.457	-7311.77		32.7	-396.693	-1679.02
32.8	13.0608	1.30266	-2.3492	-1.41		32.8	6.51154	-2.15421	-2.40766	-0.657866		32.8	-65.7379	-633.633		32.8	-67.0248	-2873.11		32.8	-1110.05	-1390.81		32.8	-20.7722	-469.538		32.8	-209.949	-7299.31		32.8	-403.232	-1669.68
32.9	5.89902	0.991516	-1.10361	-2.03268		32.9	5.57726	-3.08829	-0.850388	-0.969338		32.9	-64.8037	-642.351		32.9	-63.911	-2870		32.9	-1102.57	-1394.23		32.9	-22.0177	-459.885		32.9	-218.667	-7321.11		32.9	-399.496	-1665.95
33	4.03074	0.991776	0.76474	-2.65535		33	0.595016	-2.15408	1.64102	-0.658049		33	-67.9175	-646.711		33	-69.5159	-2859.1		33	-1083.58	-1395.48		33	-25.7543	-455.214		33	-209.949	-7330.76		33	-399.184	-1672.8
33.1	3.71936	-0.876266	-2.66039	-2.65527		33.1	1.52902	-2.46539	0.0844889	-0.0353794		33.1	-64.4924	-652.004		33.1	-75.4321	-2852.87		33.1	-1091.67	-1388.31		33.1	-22.0177	-452.1		33.1	-196.248	-7338.86		33.1	-400.741	-1684.63
33.2	5.89902	0.992264	-2.03757	-1.40968		33.2	0.594727	-0.908422	-2.09481	-0.346852		33.2	-64.4924	-663.525		33.2	-75.7435	-2842.91		33.2	-1095.1	-1379.6		33.2	-22.9519	-457.394		33.2	-189.086	-7316.44		33.2	-396.693	-1690.23
33.3	0.294174	2.23804	-2.97165	-2.96649		33.3	3.39702	-0.596973	0.0852232	0.898578		33.3	-60.4444	-652.938		33.3	-83.8394	-2833.56		33.3	-1087.94	-1382.09		33.3	-27.6226	-461.13		33.3	-185.972	-7315.82		33.3	-402.298	-1681.83
33.4	2.47384	0.681381	-2.03743	-2.03227		33.4	1.52858	-5.579	-0.848552	2.76677		33.4	-62.3127	-651.381		33.4	-80.7256	-2839.17		33.4	-1087.94	-1369.94		33.4	-28.2453	-463.933		33.4	-189.709	-7294.95		33.4	-395.136	-1668.44
33.5	4.03074	0.681641	-0.169083	0.147476		33.5	1.21706	-1.84236	-2.71647	-0.658509		33.5	-61.3786	-656.986		33.5	-74.8093	-2839.48		33.5	-1087	-1363.72		33.5	-24.1974	-456.46		33.5	-206.835	-7267.86		33.5	-398.561	-1666.88
33.6	4.96488	0.993271	0.453735	-1.72072		33.6	-1.27414	-3.08782	-4.58438	0.898303		33.6	-55.7737	-653.872		33.6	-76.6776	-2830.14		33.6	-1077.35	-1365.27		33.6	-21.7063	-453.657		33.6	-215.242	-7268.8		33.6	-395.759	-1670.93
33.7	3.0966	2.86182	0.453796	-0.475128		33.7	2.15089	-2.77637	0.398073	-0.658693		33.7	-54.5282	-655.741		33.7	-79.48	-2832.32		33.7	-1072.37	-1376.79		33.7	-23.886	-448.364		33.7	-210.883	-7281.56		33.7	-387.663	-1670.31
33.8	4.96488	0.0596313	-1.41443	-1.09779		33.8	6.82147	1.58303	-2.71537	0.586738		33.8	-54.2168	-662.902		33.8	-79.7914	-2821.73		33.8	-1069.25	-1376.48		33.8	-21.395	-444.004		33.8	-204.344	-7272.22		33.8	-387.04	-1667.81
33.9	4.96488	-3.05391	-1.10298	0.459183		33.9	5.26442	-2.15347	-1.78086	0.898026		33.9	-56.0851	-658.855		33.9	-80.1028	-2823.91		33.9	-1064.89	-1375.24		33.9	-17.9698	-437.154		33.9	-210.571	-7275.96		33.9	-387.04	-1669.37
34	3.40798	-0.874008	-2.65982	-0.163498		34	1.8391	1.89454	-1.78049	2.14346		34	-56.0851	-645.465		34	-80.4142	-2822.67		34	-1060.85	-1369.94		34	-16.1015	-433.106		34	-209.014	-7267.55		34	-385.172	-1664.39
34.1	9.32421	-2.74203	-2.65976	-1.09755		34.1	4.64136	0.649088	-1.46874	1.20922		34.1	-60.7558	-639.86		34.1	-77.9231	-2832.32		34.1	-1069.88	-1377.42		34.1	-19.5267	-433.729		34.1	-218.044	-7252.92		34.1	-386.729	-1662.52
34.2	8.70145	-2.4304	-0.791428	-0.474716		34.2	2.46156	0.337772	-1.46838	-0.659153		34.2	-63.5582	-636.435		34.2	-76.6776	-2832.01		34.2	-1074.86	-1380.84		34.2	-21.395	-438.711		34.2	-216.488	-7245.44		34.2	-375.208	-1675.91
34.3	8.07869	-0.561859	-1.72551	-1.0974		34.3	-2.52068	0.337839	-2.09077	1.20904		34.3	-57.642	-639.549		34.3	-81.3483	-2822.67		34.3	-1066.45	-1387.07		34.3	-17.9698	-448.364		34.3	-217.422	-7256.03		34.3	-371.16	-1680.58
34.4	4.96488	0.061142	-3.90511	-4.21111		34.4	-2.83221	1.27205	-0.844879	1.52033		34.4	-56.7078	-653.872		34.4	-76.3662	-2839.48		34.4	-1071.12	-1387.07		34.4	-18.2812	-445.25		34.4	-220.847	-7262.88		34.4	-369.914	-1673.73
34.5	2.78522	-1.80688	-1.10262	-1.09723		34.5	-3.14374	-0.907547	-2.40141	0.274714		34.5	-56.7078	-655.118		34.5	-74.498	-2840.41		34.5	-1074.55	-1387.69		34.5	-17.0356	-434.663		34.5	-223.027	-7258.83		34.5	-372.717	-1674.98
34.6	1.85108	-3.36354	2.01125	-2.03128		34.6	-3.45526	-4.64405	-0.532764	2.45429		34.6	-53.9054	-655.741		34.6	-72.0069	-2831.7		34.6	-1072.37	-1395.16		34.6	-14.2332	-444.316		34.6	-220.535	-7264.44		34.6	-367.735	-1670.31
34.7	7.76731	-3.98604	-0.479736	-1.09706		34.7	-3.14403	-0.596031	-1.15516	2.76557		34.7	-48.6119	-656.986		34.7	-71.0728	-2829.52		34.7	-1060.85	-1398.9		34.7	-18.2812	-450.232		34.7	-218.667	-7266.93		34.7	-376.142	-1662.21
34.8	7.14455	-2.74028	-3.59348	-0.474228		34.8	-5.63522	-3.70977	-1.77755	2.14272		34.8	-51.103	-658.543		34.8	-76.6776	-2834.19		34.8	-1059.29	-1396.1		34.8	-18.2812	-448.052		34.8	-204.344	-7266.31		34.8	-375.208	-1668.44
34.9	8.39007	-2.11726	-1.72514	-1.40828		34.9	-4.70122	-4.95522	-3.02271	1.51987		34.9	-50.7916	-653.872		34.9	-76.989	-2827.02		34.9	-1062.4	-1399.84		34.9	-21.0836	-447.741		34.9	-194.068	-7261.64		34.9	-371.16	-1666.26
35	2.47384	-2.42839	1.38873	-2.03096		35	-2.83308	-3.08688	-3.6451	1.51978		35	-48.6119	-650.447		35	-78.8573	-2818.93		35	-1064.58	-1393.3		35	-21.7063	-446.184		35	-199.984	-7250.11		35	-369.914	-1671.55
35.1	6.83317	-2.42813	-0.790863	0.148788		35.1	-5.94702	-3.70957	-3.95612	3.38797		35.1	-48.9233	-653.25		35.1	-79.48	-2816.44		35.1	-1055.24	-1383.02		35.1	-20.7722	-453.657		35.1	-206.835	-7248.56		35.1	-363.375	-1675.91
35.2	0.916935	-1.80513	-2.03632	-2.96494		35.2	-9.99513	-1.52984	-3.64437	2.76511		35.2	-48.3006	-653.25		35.2	-78.5459	-2806.78		35.2	-1055.24	-1384.89		35.2	-23.886	-439.334		35.2	-212.751	-7247.31		35.2	-363.998	-1677.78
35.3	4.03074	-1.49348	-0.479355	0.148956		35.3	-6.5701	-3.39806	-3.33262	-0.0374026		35.3	-52.6599	-648.89		35.3	-78.5459	-2802.43		35.3	-1054.31	-1385.82		35.3	-26.3771	-434.352		35.3	-208.703	-7230.81		35.3	-369.292	-1672.8
35.4	5.89902	-4.91843	-0.79068	-2.03064		35.4	-5.63609	-0.595558	-1.77535	-0.348875		35.4	-52.0371	-659.477		35.4	-78.8573	-2801.8		35.4	-1057.42	-1374.61		35.4	-17.9698	-429.992		35.4	-207.457	-7215.86		35.4	-364.31	-1675.29
35.5	8.70145	-2.11575	-0.167847	-1.09641		35.5	-1.58829	-5.57759	-2.08636	1.51932		35.5	-52.6599	-657.609		35.5	-81.6597	-2791.53		35.5	-1053.37	-1372.12		35.5	-16.7243	-430.615		35.5	-196.871	-7215.55		35.5	-367.112	-1677.47
35.6	5.89902	-4.91792	-1.41331	-3.276		35.6	-1.89981	-0.906807	2.27333	1.51922		35.6	-50.7916	-651.693		35.6	-74.1866	-2804.92		35.6	-1056.18	-1363.09		35.6	-19.5267	-427.501		35.6	-194.691	-7230.81		35.6	-365.866	-1660.34
35.7	6.2104	-3.04938	-1.10187	-2.03038		35.7	-0.96582	0.650166	0.405417	-0.349151		35.7	-51.4144	-655.741		35.7	-70.1386	-2795.26		35.7	-1057.42	-1375.55		35.7	-22.3291	-438.711		35.7	-191.266	-7227.38		35.7	-363.687	-1666.57
35.8	10.5697	-1.49223	-1.72458	-0.162018		35.8	-1.9001	-1.21805	-1.77388	0.584898		35.8	-51.7257	-652.316		35.8	-71.3841	-2790.59		35.8	-1050.26	-1383.02		35.8	-25.1315	-446.495		35.8	-180.367	-7231.74		35.8	-358.393	-1667.5
35.9	12.438	-1.49197	-1.72452	-2.34161		35.9	-2.52301	1.27306	-0.839371	2.76447		35.9	-51.4144	-647.022		35.9	-71.6955	-2804.92		35.9	-1054	-1386.45		35.9	-20.7722	-445.561		35.9	-176.942	-7241.4		35.9	-351.854	-1671.55
36	11.8153	-0.557587	-1.72446	-2.65289		36	-0.966248	-1.84068	-2.39591	1.20748		36	-50.7916	-636.747		36	-72.9411	-2796.82		36	-1051.51	-1389.56		36	-20.7722	-444.316		36	-181.924	-7232.37		36	-358.393	-1683.7
36.1	13.0608	-1.80286	-1.7244	-1.4073		36.1	1.21326	-1.52923	1.02965	-0.349518		36.1	-48.9233	-641.106		36.1	-71.0728	-2810.52		36.1	-1050.57	-1389.56		36.1	-21.7063	-444.627		36.1	-185.661	-7224.58		36.1	-356.214	-1693.04
36.2	13.0608	-2.73676	-2.96985	-1.7186		36.2	0.278961	-2.46331	1.03001	3.07558		36.2	-52.6599	-637.058		36.2	-66.7134	-2813.95		36.2	-1044.97	-1396.41		36.2	-17.347	-451.477		36.2	-180.056	-7194.07		36.2	-357.771	-1689.61
36.3	9.32421	-4.60478	0.455399	-2.02989		36.3	-0.343933	-3.39738	-1.14928	0.584439		36.3	-48.9233	-632.387		36.3	-63.911	-2811.46		36.3	-1043.41	-1394.23		36.3	-19.5267	-447.741		36.3	-181.613	-7169.78		36.3	-355.902	-1687.74
36.4	9.94697	-4.29315	-0.79007	-1.40706		36.4	5.88353	-1.21765	-5.19686	-0.349794		36.4	-55.4623	-631.453		36.4	-68.8931	-2811.14		36.4	-1049.95	-1389.56		36.4	-25.1315	-438.4		36.4	-176.631	-7167.6		36.4	-352.788	-1679.02
36.5	8.07869	-3.35875	-1.10138	-1.40697		36.5	5.57201	-0.9062	-3.32821	0.895636		36.5	-53.2827	-638.303		36.5	-69.8272	-2811.77		36.5	-1045.9	-1392.99		36.5	-15.4787	-443.693		36.5	-185.038	-7156.08		36.5	-347.806	-1674.98
36.6	12.1266	-1.49022	-2.03546	-0.472748		36.6	-0.0329895	-1.52889	-2.08232	1.20692		36.6	-51.7257	-642.351		36.6	-63.911	-2807.72		36.6	-1040.3	-1388		36.6	-18.5925	-438.088		36.6	-195.002	-7152.34		36.6	-348.741	-1671.24
36.7	8.70145	-3.04686	0.767044	-1.40681		36.7	-2.52417	-3.39711	-0.836432	0.27269		36.7	-50.4802	-642.974		36.7	-63.2883	-2796.2		36.7	-1043.41	-1386.13		36.7	-22.3291	-436.22		36.7	-188.775	-7154.83		36.7	-347.184	-1673.42
36.8	9.63559	-2.73524	-2.03532	-2.96362		36.8	-4.08124	-2.4629	-3.32711	2.76364		36.8	-53.594	-650.447		36.8	-61.1086	-2793.71		36.8	-1034.07	-1386.45		36.8	-20.7722	-431.861		36.8	-185.038	-7156.08		36.8	-343.447	-1680.58
36.9	1.85108	-2.73499	0.45578	-1.71802		36.9	-2.83585	-1.52869	-3.32674	2.45217		36.9	-49.8575	-650.447		36.9	-57.372	-2789.04		36.9	-1034.38	-1375.86		36.9	-19.8381	-424.387		36.9	-181.302	-7159.5		36.9	-341.579	-1682.45
37	3.40798	-2.73474	-0.478302	-0.472427		37	-7.19533	1.89656	-2.08085	3.38622		37	-48.3006	-653.25		37	-57.9948	-2777.52		37	-1033.45	-1376.48		37	-20.4608	-427.501		37	-179.122	-7153.9		37	-334.728	-1685.25
37.1	3.40798	-2.11172	-3.59204	-1.09509		37.1	-3.14754	0.0283451	-4.57153	3.07475		37.1	-46.7437	-651.381		37.1	-57.9948	-2787.48		37.1	-1031.58	-1388.31		37.1	-20.4608	-423.453		37.1	-173.517	-7138.95		37.1	-333.483	-1688.05
37.2	2.78522	-3.35699	-0.47818	-2.02916		37.2	0.588898	-0.905729	-2.3915	3.07466		37.2	-47.6778	-667.262		37.2	-56.7493	-2794.64		37.2	-1038.12	-1389.56		37.2	-19.2153	-430.304		37.2	-177.876	-7115.6		37.2	-334.106	-1676.53
37.3	3.40798	-0.865692	-2.65778	-3.89737		37.3	5.25946	0.0284805	-0.211468	2.14042		37.3	-45.8095	-672.244		37.3	-60.1744	-2792.77		37.3	-1028.15	-1395.48		37.3	-17.347	-444.316		37.3	-184.104	-7112.48		37.3	-334.728	-1668.44
37.4	6.83317	-0.242691	0.456085	-4.52003		37.4	2.76828	-1.83974	0.723041	1.82895		37.4	-46.1209	-667.573		37.4	-57.372	-2794.64		37.4	-1023.48	-1393.92		37.4	-14.856	-441.825		37.4	-175.697	-7109.37		37.4	-332.237	-1674.35
37.5	4.34212	-1.17657	-0.166611	-3.27444		37.5	4.6364	-0.282766	1.34617	3.07438		37.5	-45.8095	-662.902		37.5	-55.8151	-2806.16		37.5	-1022.86	-1384.89		37.5	-17.347	-443.693		37.5	-178.81	-7104.39		37.5	-331.615	-1664.08
37.6	8.70145	-0.864944	-1.41208	-2.34021		37.6	5.25903	-3.08512	0.723775	2.76291		37.6	-47.6778	-653.872		37.6	-56.1265	-2794.64		37.6	-1008.22	-1391.12		37.6	-16.1015	-460.819		37.6	-172.894	-7099.41		37.6	-326.944	-1658.78
37.7	9.32421	-3.35573	-5.45996	-2.96289		37.7	0.899551	-1.21677	-2.38966	4.00834		37.7	-46.4323	-654.495		37.7	-55.1924	-2791.84		37.7	-1029.4	-1381.15		37.7	-13.9218	-461.442		37.7	-171.337	-7097.23		37.7	-326.01	-1669.99
37.8	3.40798	-3.97824	-0.7892	-3.89696		37.8	5.25873	-0.282564	-3.01206	2.76272		37.8	-48.3006	-649.825		37.8	-51.1444	-2787.17		37.8	-1023.17	-1378.97		37.8	-12.6763	-450.855		37.8	-177.876	-7102.52		37.8	-330.058	-1668.44
37.9	2.47384	-1.48694	-0.789139	-1.09444		37.9	-1.28041	0.651648	-0.832026	2.45125		37.9	-48.6119	-645.777		37.9	-52.7013	-2788.1		37.9	-1025.35	-1394.85		37.9	-16.4129	-436.843		37.9	-190.332	-7112.8		37.9	-331.303	-1665.32
38	4.6535	-2.73222	2.01335	-0.471603		38	-5.01712	1.27448	-2.69994	5.56497		38	-48.6119	-641.417		38	-53.6355	-2783.12		38	-1022.86	-1397.97		38	-17.9698	-438.711		38	-192.823	-7105.95		38	-324.453	-1659.1
38.1	1.85108	-2.73196	-1.72316	-2.33981		38.1	-6.26279	-1.83927	-1.76543	4.31935		38.1	-47.6778	-644.842		38.1	-55.5037	-2766.62		38.1	-1014.76	-1395.79		38.1	-11.1194	-437.777		38.1	-181.302	-7111.24		38.1	-324.141	-1659.1
38.2	-0.951347	-1.79758	-0.788956	-2.33972		38.2	-6.8857	-0.282293	-1.45369	3.38512		38.2	-43.3185	-636.435		38.2	-62.0427	-2766.93		38.2	-1012.58	-1396.72		38.2	-13.2991	-436.531		38.2	-176.319	-7085.71		38.2	-325.076	-1661.28
38.3	-0.0172081	-1.17456	-0.166122	-2.02826		38.3	-0.0354614	0.340534	0.103585	-0.351542		38.3	-43.3185	-636.435		38.3	-62.9769	-2766.62		38.3	-1017.57	-1406.37		38.3	-13.6104	-445.873		38.3	-181.302	-7085.71		38.3	-324.141	-1664.08
38.4	-0.951347	-3.04259	-1.72296	-2.33955		38.4	1.2099	1.8975	-1.76433	-0.351634		38.4	-43.3185	-633.321		38.4	-62.9769	-2769.11		38.4	-1015.39	-1411.67		38.4	-14.5446	-451.789		38.4	-181.302	-7094.11		38.4	-321.028	-1670.31
38.5	0.916935	1.62837	0.456772	1.39709		38.5	-2.21542	0.652052	-3.32087	3.38484		38.5	-40.516	-629.273		38.5	-62.3541	-2774.4		38.5	-1005.73	-1402.64		38.5	-15.7901	-448.364		38.5	-171.96	-7083.21		38.5	-322.896	-1664.39
38.6	-2.81963	-2.73071	-0.788696	-0.471115		38.6	0.275467	0.652119	-1.14084	0.893704		38.6	-44.2526	-623.046		38.6	-56.7493	-2769.42		38.6	-1001.37	-1402.64		38.6	-18.2812	-447.741		38.6	-170.715	-7081.04		38.6	-312.62	-1656.92
38.7	-1.57411	-2.1077	-0.788635	-2.33931		38.7	-0.347443	0.652185	-2.69737	2.45052		38.7	-43.6299	-630.519		38.7	-54.881	-2773.16		38.7	-1009.47	-1400.77		38.7	-13.2991	-447.43		38.7	-176.631	-7073.25		38.7	-311.686	-1656.29
38.8	1.85108	-0.239166	-0.165802	-0.470947		38.8	1.52071	0.0294895	-1.76286	3.38457		38.8	-36.1567	-633.633		38.8	-54.5696	-2774.71		38.8	-1011.96	-1396.1		38.8	-7.07146	-447.118		38.8	-179.745	-7065.78		38.8	-311.998	-1660.03
38.9	1.85108	-2.72995	-1.41127	-1.09363		38.9	-2.52739	-0.281822	-1.13973	-0.974855		38.9	-39.2705	-620.555		38.9	-54.2582	-2780.32		38.9	-994.211	-1399.84		38.9	-15.7901	-439.956		38.9	-173.828	-7066.71		38.9	-311.063	-1662.21
39	-0.0172081	0.384109	-0.788452	-1.40492		39	-7.19824	-1.2159	0.106156	0.270576		39	-40.2047	-624.291		39	-52.3899	-2768.8		39	-997.637	-1397.97		39	-10.808	-435.908		39	-176.319	-7070.76		39	-309.818	-1656.29
39.1	1.5397	-1.7953	0.457138	0.774826		39.1	-1.28217	-0.904449	-2.6959	3.38429		39.1	-36.4681	-635.19		39.1	-54.5696	-2753.23		39.1	-1000.44	-1390.81		39.1	-10.1853	-442.136		39.1	-178.499	-7072.94		39.1	-310.129	-1660.34
39.2	4.96488	-2.10645	-1.0997	-1.71614		39.2	-6.88715	-1.21576	-0.20449	0.893153		39.2	-37.7136	-638.303		39.2	-52.3899	-2757.9		39.2	-991.409	-1394.85		39.2	-8.0056	-439.645		39.2	-180.367	-7072.32		39.2	-309.507	-1660.34
39.3	1.22831	-0.2379	-1.72241	-0.781906		39.3	-4.39626	-0.904314	1.35278	1.51582		39.3	-39.2705	-637.369		39.3	-53.3241	-2756.34		39.3	-987.672	-1382.09		39.3	-9.5625	-435.286		39.3	-183.481	-7071.38		39.3	-306.704	-1648.51
39.4	0.605553	-3.35146	-0.476822	0.463684		39.4	-8.13297	-4.95219	0.107625	4.31816		39.4	-37.0909	-639.238		39.4	-62.0427	-2755.1		39.4	-996.703	-1386.13		39.4	-15.4787	-445.25		39.4	-186.284	-7049.9		39.4	-304.524	-1635.74
39.5	2.47384	-1.79431	-1.09952	-0.158981		39.5	-0.0372162	0.341343	-1.76029	3.38392		39.5	-32.7315	-637.992		39.5	-63.5996	-2754.16		39.5	-997.948	-1383.33		39.5	-16.1015	-446.495		39.5	-183.17	-7037.44		39.5	-300.477	-1632.63
39.6	1.85108	-4.59648	-0.165314	-0.158905		39.6	-2.8398	-1.52687	-3.00545	4.00659		39.6	-40.2047	-646.711		39.6	-62.9769	-2748.56		39.6	-986.427	-1374.93		39.6	-12.0535	-448.986		39.6	-180.367	-7037.44		39.6	-304.524	-1635.43
39.7	1.85108	-3.97346	0.146118	0.152557		39.7	-1.28304	-2.77233	1.97701	4.0065		39.7	-38.025	-639.549		39.7	-59.5517	-2747.93		39.7	-980.199	-1379.91		39.7	-12.3649	-441.513		39.7	-183.17	-7028.72		39.7	-293.003	-1641.35
39.8	1.5397	-3.66183	0.457565	2.33231		39.8	1.83063	-2.1495	-1.13643	4.00641		39.8	-34.5998	-633.321		39.8	-61.7314	-2760.39		39.8	-984.247	-1388.31		39.8	-16.7243	-440.579		39.8	-176.008	-7021.25		39.8	-297.985	-1638.23
39.9	5.27626	-2.72745	-1.09927	-1.0928		39.9	-9.37921	-1.83805	-1.75882	2.13803		39.9	-35.534	-629.585		39.9	-56.7493	-2762.88		39.9	-982.068	-1380.53		39.9	-20.4608	-449.921		39.9	-169.78	-7029.03		39.9	-295.494	-1645.4
40	4.96488	-2.4158	-1.72197	-0.781342		40	-5.64281	-0.903843	-2.38122	3.07208		40	-35.534	-623.98		40	-55.5037	-2761.63		40	-987.361	-1379.91		40	-18.5925	-451.789		40	-160.75	-7036.2		40	-296.429	-1646.64
40.1	5.89902	-2.10419	0.457764	-0.158493		40.1	3.69847	-7.13139	-3.62637	2.76061		40.1	-36.7795	-622.112		40.1	-56.4379	-2768.8		40.1	-978.331	-1382.09		40.1	-17.347	-452.723		40.1	-161.373	-7025.61		40.1	-295.183	-1651
40.2	2.16246	-0.858398	-0.476318	1.70987		40.2	4.94385	-4.64028	-3.626	0.580853		40.2	-37.0909	-611.525		40.2	-58.9289	-2771.6		40.2	-979.265	-1380.53		40.2	-16.4129	-445.873		40.2	-169.78	-7026.85		40.2	-299.854	-1646.33
40.3	2.78522	-1.48091	0.769272	-0.158325		40.3	0.895767	-4.64021	-1.44597	2.13766		40.3	-33.9771	-610.591		40.3	-57.9948	-2765.37		40.3	-986.116	-1379.91		40.3	-15.1674	-443.07		40.3	-165.11	-7029.03		40.3	-302.656	-1650.69
40.4	4.96488	-1.48065	-0.787582	0.153137		40.4	0.895615	-3.706	-1.75699	-0.353473		40.4	-33.0429	-602.806		40.4	-55.8151	-2760.39		40.4	-973.038	-1374.3		40.4	-16.7243	-442.136		40.4	-163.553	-7006.62		40.4	-302.033	-1654.43
40.5	7.45593	-2.41455	0.769394	-1.09232		40.5	1.82961	-1.83765	0.111665	2.13748		40.5	-29.6177	-602.495		40.5	-53.3241	-2753.54		40.5	-974.283	-1371.19		40.5	-13.6104	-440.579		40.5	-166.667	-6996.34		40.5	-299.542	-1642.28
40.6	1.85108	-1.48015	0.458069	1.71021		40.6	-2.52986	-2.14896	-0.199349	2.76015		40.6	-33.0429	-614.327		40.6	-50.5216	-2766.62		40.6	-978.02	-1373.99		40.6	-17.9698	-441.825		40.6	-158.882	-7011.91		40.6	-293.315	-1632.63
40.7	-2.50825	0.388382	1.39227	-0.469391		40.7	-3.46416	-7.13098	-1.75589	2.76006		40.7	-32.4202	-620.243		40.7	-58.6175	-2761.95		40.7	-969.924	-1379.91		40.7	-15.7901	-441.202		40.7	-158.571	-6996.34		40.7	-292.692	-1637.3
40.8	-4.06516	-2.72517	-0.475952	-0.157928		40.8	0.272263	-4.63987	-1.75552	2.44859		40.8	-33.6657	-624.914		40.8	-53.3241	-2760.08		40.8	-969.301	-1384.89		40.8	-16.7243	-437.777		40.8	-156.702	-7004.44		40.8	-293.938	-1641.35
40.9	-3.13101	-5.21597	2.32654	-0.157837		40.9	-1.59616	-3.0829	-3.00067	2.13711		40.9	-31.1746	-612.459		40.9	-52.3899	-2760.39		40.9	-972.103	-1386.45		40.9	-15.1674	-436.843		40.9	-165.421	-7018.45		40.9	-291.446	-1653.18
41	-5.62206	-3.34743	0.458313	-1.40329		41	-0.66217	-3.70559	-0.19788	2.4484		41	-25.5698	-615.884		41	-53.0127	-2749.49		41	-969.612	-1394.85		41	-16.4129	-427.813		41	-160.439	-7033.39		41	-294.56	-1655.05
41.1	-2.50825	-1.79028	1.08113	1.7106		41.1	0.27182	-4.95105	0.113868	0.580025		41.1	-25.8812	-623.046		41.1	-52.7013	-2747		41.1	-968.055	-1381.15		41.1	-19.2153	-426.256		41.1	-155.768	-7038.06		41.1	-293.003	-1659.41
41.2	-2.81963	-2.10141	2.63809	-0.468979		41.2	-0.662476	-4.6396	0.425616	2.44822		41.2	-26.8153	-624.291		41.2	-50.833	-2752.29		41.2	-969.301	-1394.23		41.2	-17.0356	-421.274		41.2	-154.834	-7026.85		41.2	-290.512	-1664.39
41.3	-0.328587	-1.78978	3.5723	1.71077		41.3	-0.351227	-3.70539	-0.196778	2.13674		41.3	-28.0608	-630.208		41.3	-53.6355	-2742.64		41.3	-962.451	-1402.02		41.3	-16.7243	-426.567		41.3	-152.966	-7002.26		41.3	-295.494	-1671.86
41.4	-0.951347	-2.41228	-0.475586	0.153961		41.4	3.38519	-5.57361	0.42635	3.38217		41.4	-23.0787	-625.848		41.4	-55.8151	-2750.74		41.4	-946.882	-1404.82		41.4	-16.7243	-427.19		41.4	-149.852	-6997.27		41.4	-296.74	-1665.01
41.5	-1.26273	-3.03479	1.70415	0.465408		41.5	4.00781	-5.26216	0.115337	2.75932		41.5	-22.456	-623.357		41.5	-54.5696	-2754.16		41.5	-947.193	-1414.78		41.5	-19.2153	-419.405		41.5	-150.786	-7008.17		41.5	-297.985	-1661.28
41.6	-1.57411	-2.41177	2.01558	-1.09142		41.6	2.45076	-1.83691	-0.507057	1.51371		41.6	-23.7015	-619.932		41.6	-53.0127	-2742.64		41.6	-951.552	-1406.69		41.6	-21.0836	-414.112		41.6	-142.69	-7029.66		41.6	-293.315	-1655.67
41.7	3.71936	-3.65706	-1.09814	1.71111		41.7	-1.59732	-3.08236	-1.12945	0.890854		41.7	-27.7494	-615.884		41.7	-58.9289	-2744.2		41.7	-947.504	-1410.11		41.7	-17.9698	-415.046		41.7	-136.463	-7039.62		41.7	-294.56	-1643.22
41.8	1.5397	-1.78851	1.70435	1.3998		41.8	-4.3999	-3.70506	-0.817703	1.51352		41.8	-27.4381	-623.98		41.8	-53.3241	-2748.56		41.8	-942.211	-1415.09		41.8	-19.8381	-415.357		41.8	-136.151	-7043.98		41.8	-295.806	-1641.97
41.9	-1.57411	-1.47688	1.70441	-0.468414		41.9	-9.69351	-2.45947	1.05095	-0.977613		41.9	-24.6356	-627.716		41.9	-51.4558	-2743.57		41.9	-943.768	-1412.29		41.9	-17.347	-409.752		41.9	-135.529	-7035.26		41.9	-293.938	-1652.25
42	2.16246	-3.03352	-1.72073	-0.468323		42	-5.02295	-2.77078	0.428554	1.20196		42	-24.947	-607.788		42	-49.5875	-2738.28		42	-938.786	-1408.24		42	-21.0836	-408.818		42	-123.696	-7032.46		42	-287.71	-1655.98
42.1	1.85108	0.703278	1.08176	-1.091		42.1	-4.40034	-2.45933	-0.193841	0.267725		42.1	-27.4381	-594.087		42.1	-49.8989	-2744.82		42.1	-943.145	-1416.34		42.1	-19.8381	-412.244		42.1	-121.516	-7020.94		42.1	-290.201	-1654.11
42.2	-0.639969	1.32631	1.3932	0.154602		42.2	1.82713	-1.8365	-1.75038	2.13592		42.2	-27.1267	-603.429		42.2	-50.833	-2747.31		42.2	-930.067	-1414.16		42.2	-17.6584	-416.603		42.2	-129.612	-7029.97		42.2	-286.464	-1660.34
42.3	4.96488	-0.853119	0.770508	2.64574		42.3	-2.53235	-2.77057	0.118275	2.75859		42.3	-24.3243	-610.902		42.3	-45.8509	-2753.85		42.3	-928.822	-1399.84		42.3	-15.1674	-431.238		42.3	-130.546	-7036.82		42.3	-285.219	-1654.74
42.4	3.40798	0.0812836	0.770569	2.33443		42.4	-4.0894	-2.45913	0.118642	0.89021		42.4	-26.1925	-617.441		42.4	-48.9647	-2765.37		42.4	-934.426	-1392.67		42.4	-15.7901	-438.4		42.4	-130.858	-7022.18		42.4	-286.776	-1644.46
42.5	2.16246	-0.229858	-0.786285	-0.156525		42.5	-0.975739	-7.75253	-0.192371	1.2015		42.5	-22.456	-624.603		42.5	-49.8989	-2763.19		42.5	-934.738	-1393.61		42.5	-12.0535	-440.268		42.5	-130.235	-7010.35		42.5	-285.219	-1642.28
42.6	1.5397	0.0817871	3.26173	0.777695		42.6	-3.15555	-5.88418	-1.43753	1.51279		42.6	-26.8153	-625.225		42.6	-51.7672	-2757.9		42.6	-936.606	-1390.18		42.6	-14.2332	-439.334		42.6	-124.007	-6990.73		42.6	-287.71	-1641.66
42.7	-3.13101	-1.47487	2.01627	1.40053		42.7	-0.976028	-2.14754	-2.05992	1.20132		42.7	-24.3243	-616.818		42.7	-52.3899	-2761.32		42.7	-928.51	-1391.74		42.7	-14.856	-438.711		42.7	-122.762	-6981.39		42.7	-290.512	-1633.56
42.8	-0.639969	-1.47461	1.39357	2.02338		42.8	0.269348	-6.19543	0.742872	3.06951		42.8	-27.4381	-607.788		42.8	-50.5216	-2757.9		42.8	-930.067	-1393.3		42.8	-13.9218	-444.316		42.8	-126.499	-6976.41		42.8	-286.153	-1626.4
42.9	1.5397	-1.16299	-0.786041	3.58037		42.9	2.13748	-8.06364	-0.502283	3.06941		42.9	-32.1088	-603.117		42.9	-47.4078	-2757.9		42.9	-925.708	-1384.58		42.9	-15.4787	-452.1		42.9	-133.66	-6958.66		42.9	-282.728	-1632.63
43	-1.88549	-1.16273	0.770935	2.6463		43	3.07147	-0.590439	-2.99296	1.8238		43	-30.8632	-611.525		43	-45.8509	-2755.72		43	-916.678	-1377.42		43	-13.2991	-456.771		43	-128.678	-6966.76		43	-285.219	-1641.97
43.1	-7.80172	-1.78525	2.3279	0.778107		43.1	-1.91075	-2.45866	-0.812929	3.38061		43.1	-29.9291	-619.932		43.1	-49.5875	-2752.92		43.1	-918.546	-1377.73		43.1	-17.6584	-459.262		43.1	-119.025	-6973.61		43.1	-278.68	-1651
43.2	-4.9993	-0.850845	1.39381	1.08955		43.2	-4.71333	-4.94963	1.3671	2.135		43.2	-28.6836	-618.686		43.2	-52.7013	-2761.95		43.2	-919.792	-1375.55		43.2	-18.9039	-462.064		43.2	-118.403	-6980.46		43.2	-279.614	-1652.56
43.3	-0.951347	-1.78474	1.70526	2.95793		43.3	-1.91104	-4.94957	1.36747	1.82352		43.3	-27.1267	-618.064		43.3	-54.5696	-2762.26		43.3	-918.546	-1366.52		43.3	-19.5267	-453.657		43.3	-121.205	-6968.63		43.3	-274.943	-1655.98
43.4	-1.26273	-0.850342	2.32809	1.40111		43.4	-5.64777	-2.45846	1.05646	-0.0448508		43.4	-28.0608	-616.507		43.4	-49.5875	-2774.09		43.4	-910.761	-1366.83		43.4	-19.2153	-454.591		43.4	-122.139	-6950.88		43.4	-274.321	-1654.74
43.5	-2.19687	0.706802	1.7054	1.40118		43.5	0.579712	0.0326557	0.434062	-0.979085		43.5	-30.2405	-620.243		43.5	-45.2282	-2771.29		43.5	-905.468	-1376.48		43.5	-17.9698	-460.819		43.5	-118.403	-6941.23		43.5	-274.632	-1652.25
43.6	-0.0172081	-0.849838	2.32822	-0.155624		43.6	-1.28873	-0.590034	0.123049	1.51187		43.6	-28.995	-620.555		43.6	-42.4258	-2771.6		43.6	-911.696	-1374.93		43.6	-14.5446	-459.885		43.6	-119.025	-6948.08		43.6	-271.829	-1656.29
43.7	-0.639969	-0.226837	0.459991	1.08997		43.7	-5.33681	-3.70378	0.746177	2.44592		43.7	-27.7494	-621.177		43.7	-45.5396	-2773.16		43.7	-907.648	-1361.85		43.7	-12.9877	-450.543		43.7	-116.846	-6953.37		43.7	-272.141	-1658.47
43.8	-0.0172081	-1.16072	2.32834	2.33557		43.8	-5.33696	-4.63785	1.68069	1.51168		43.8	-30.5519	-617.752		43.8	-53.0127	-2784.05		43.8	-909.205	-1366.52		43.8	-10.1853	-452.1		43.8	-111.864	-6953.68		43.8	-269.65	-1651.31
43.9	-4.06516	-1.47185	1.39426	4.20395		43.9	-6.89401	-3.70364	-1.74413	2.13435		43.9	-31.486	-621.8		43.9	-54.5696	-2774.71		43.9	-909.205	-1380.53		43.9	-14.5446	-453.657		43.9	-111.864	-6963.02		43.9	-269.027	-1646.64
44	-3.13101	-1.78297	0.460175	0.778839		44	-5.33725	-7.12876	-1.121	1.20012		44	-34.9112	-619.932		44	-52.0786	-2772.53		44	-905.157	-1377.42		44	-15.1674	-455.525		44	-116.223	-6963.96		44	-264.045	-1650.07
44.1	-0.328587	-1.78273	2.63989	-0.466614		44.1	-2.84636	-5.26041	0.747646	-0.668256		44.1	-35.534	-618.064		44.1	-55.8151	-2768.49		44.1	-907.025	-1370.88		44.1	-15.4787	-462.376		44.1	-117.468	-6945.58		44.1	-258.44	-1643.53
44.2	-1.88549	-1.78247	2.0172	1.40176		44.2	-8.45135	-4.01482	3.55044	1.51132		44.2	-34.2884	-600.938		44.2	-52.3899	-2758.83		44.2	-896.438	-1368.07		44.2	-17.0356	-455.837		44.2	-110.307	-6923.79		44.2	-263.111	-1638.86
44.3	-1.88549	-2.09361	2.01726	2.33598		44.3	-7.51736	-2.45785	2.30528	2.75675		44.3	-31.7974	-600.938		44.3	-48.6534	-2749.18		44.3	-893.947	-1371.19		44.3	-12.0535	-443.07		44.3	-105.013	-6909.15		44.3	-263.111	-1645.4
44.4	2.78522	-0.225067	2.3287	3.5816		44.4	-6.58336	-5.88297	1.37151	0.576991		44.4	-33.0429	-610.591		44.4	-51.1444	-2742.02		44.4	-896.127	-1377.42		44.4	-19.5267	-444.627		44.4	-101.277	-6888.91		44.4	-257.817	-1648.51
44.5	3.40798	-0.536194	3.57428	2.02477		44.5	-5.96074	-4.94876	0.749115	1.51104		44.5	-32.4202	-616.507		44.5	-49.8989	-2739.53		44.5	-897.683	-1364.65		44.5	-18.5925	-455.214		44.5	-97.2287	-6887.04		44.5	-259.063	-1655.67
44.6	2.78522	1.33235	1.70607	1.71347		44.6	-5.02675	-4.63731	0.126721	1.19957		44.6	-33.9771	-617.441		44.6	-48.0306	-2737.35		44.6	-898.618	-1360.29		44.6	-12.3649	-459.885		44.6	-96.2946	-6888.29		44.6	-260.308	-1648.82
44.7	3.40798	-0.224319	1.70613	1.40218		44.7	-5.02689	-4.32586	0.127089	-0.0460463		44.7	-33.3543	-622.112		44.7	-42.1144	-2738.59		44.7	-899.863	-1379.28		44.7	-15.4787	-456.771		44.7	-101.277	-6886.42		44.7	-264.045	-1648.82
44.8	7.76731	-0.846817	4.50861	2.3364		44.8	-0.979095	-4.94855	2.30712	-0.0461383		44.8	-35.2226	-627.405		44.8	-42.1144	-2733.92		44.8	-894.881	-1382.09		44.8	-15.7901	-448.675		44.8	-98.1629	-6874.28		44.8	-258.129	-1640.1
44.9	4.6535	-2.0921	2.01762	2.64786		44.9	-5.96132	-5.88263	1.37335	-0.668992		44.9	-30.8632	-614.638		44.9	-45.5396	-2736.41		44.9	-887.719	-1379.91		44.9	-17.6584	-439.956		44.9	-100.965	-6860.27		44.9	-253.147	-1641.66
45	5.27626	-0.846313	2.64046	2.64795		45	-0.0452423	-5.88256	4.7989	0.265059		45	-29.6177	-622.734		45	-53.6355	-2738.59		45	-874.953	-1369.94		45	-13.6104	-436.531		45	-96.9174	-6852.79		45	-256.572	-1649.44
45.1	4.6535	-0.223312	2.64052	1.09111		45.1	2.13428	-4.63697	3.24236	-0.357794		45.1	-32.7315	-632.699		45.1	-48.0306	-2735.79		45.1	-879.312	-1356.86		45.1	-14.2332	-431.861		45.1	-96.2946	-6865.87		45.1	-252.835	-1648.82
45.2	4.03074	-0.84581	3.26335	2.64812		45.2	2.13412	-5.88243	2.30859	2.13316		45.2	-34.5998	-636.124		45.2	-44.294	-2737.35		45.2	-888.342	-1359.98		45.2	-16.1015	-427.19		45.2	-99.7198	-6861.82		45.2	-248.476	-1644.15
45.3	5.58764	-0.222809	2.01788	4.51646		45.3	2.75676	-7.75064	3.86586	-1.29212		45.3	-32.7315	-632.699		45.3	-42.4258	-2743.57		45.3	-878.066	-1372.12		45.3	-16.4129	-428.124		45.3	-94.4263	-6867.43		45.3	-245.674	-1649.13
45.4	1.5397	1.33437	1.70657	0.468597		45.4	0.265549	-4.32539	4.80037	2.44436		45.4	-38.025	-611.213		45.4	-40.5575	-2748.87		45.4	-869.659	-1382.71		45.4	-12.6763	-417.537		45.4	-86.6418	-6859.33		45.4	-246.919	-1653.49
45.5	2.47384	-0.533676	1.70663	1.71422		45.5	6.49301	-5.88223	1.37555	1.51012		45.5	-36.1567	-605.92		45.5	-43.6713	-2734.86		45.5	-868.102	-1374.93		45.5	-20.4608	-410.687		45.5	-80.7256	-6862.76		45.5	-248.476	-1648.51
45.6	4.34212	0.400711	1.39531	1.71429		45.6	4.62459	-9.61873	-2.04927	-0.046874		45.6	-29.9291	-603.74		45.6	-43.3599	-2733.92		45.6	-868.102	-1363.09		45.6	-18.9039	-409.441		45.6	-88.5101	-6856.22		45.6	-248.476	-1641.04
45.7	3.71936	-1.7787	2.01813	0.780228		45.7	6.80411	-5.57071	0.442142	-0.0469656		45.7	-34.2884	-610.279		45.7	-41.4916	-2730.5		45.7	-869.659	-1377.42		45.7	-17.347	-420.028		45.7	-101.899	-6869.92		45.7	-247.23	-1641.04
45.8	0.916935	-2.08984	1.70682	2.33722		45.8	6.49258	-4.94788	0.753889	-0.358438		45.8	-36.1567	-612.77		45.8	-42.7371	-2728.32		45.8	-868.725	-1369.63		45.8	-19.2153	-420.339		45.8	-106.57	-6863.69		45.8	-243.182	-1648.82
45.9	-2.19687	-0.844055	2.01825	0.157639		45.9	8.36072	-5.57058	2.31116	-1.91543		45.9	-35.2226	-612.459		45.9	-41.4916	-2722.71		45.9	-869.348	-1363.72		45.9	-20.7722	-414.423		45.9	-105.013	-6855.91		45.9	-246.919	-1660.96
46	-1.88549	3.51552	4.19798	2.96013		46	5.24678	-5.88189	0.754624	0.575519		46	-33.3543	-618.375		46	-48.9647	-2732.68		46	-874.953	-1365.27		46	-16.7243	-418.783		46	-102.211	-6874.59		46	-244.739	-1656.92
46.1	-0.328587	1.64749	2.32976	0.469177		46.1	1.82144	-3.39078	-0.490531	-0.0473337		46.1	-36.4681	-623.98		46.1	-45.2282	-2734.86		46.1	-872.773	-1363.72		46.1	-17.0356	-422.83		46.1	-97.2287	-6860.89		46.1	-249.099	-1664.7
46.2	-0.328587	-1.15469	4.1981	2.02615		46.2	1.50992	-1.21105	-1.42431	-0.358806		46.2	-38.6478	-624.291		46.2	-41.1802	-2735.48		46.2	-870.593	-1353.75		46.2	-19.8381	-421.585		46.2	-97.8515	-6852.17		46.2	-241.314	-1664.39
46.3	-0.951347	-0.843048	1.70712	0.780731		46.3	-4.40646	-2.4565	1.37849	-1.29304		46.3	-39.2705	-624.291		46.3	-44.294	-2743.57		46.3	-861.563	-1358.42		46.3	-15.7901	-424.387		46.3	-88.8215	-6840.34		46.3	-242.248	-1666.57
46.4	-0.328587	0.714096	2.01855	1.40356		46.4	-5.65215	-6.50438	6.04956	0.575151		46.4	-37.4022	-613.082		46.4	-46.7851	-2737.04		46.4	-858.138	-1364.34		46.4	-17.0356	-430.615		46.4	-91.9353	-6819.48		46.4	-237.266	-1660.96
46.5	2.16246	0.0915985	3.26414	1.71503		46.5	-6.58643	-4.32465	0.133699	1.19782		46.5	-37.4022	-613.704		46.5	-40.8688	-2732.68		46.5	-860.941	-1356.24		46.5	-14.2332	-423.765		46.5	-93.1808	-6827.26		46.5	-232.284	-1655.36
46.6	2.16246	0.0918427	-0.16098	2.96063		46.6	-5.96381	-5.57011	1.69097	-0.0477934		46.6	-37.7136	-605.608		46.6	-42.1144	-2732.36		46.6	-849.419	-1365.27		46.6	-14.5446	-422.519		46.6	-98.7856	-6845.32		46.6	-239.446	-1654.43
46.7	4.34212	1.33763	1.396	1.09242		46.7	-1.60461	-4.6359	3.871	-0.670647		46.7	-38.3364	-604.052		46.7	-42.4258	-2722.4		46.7	-843.503	-1363.4		46.7	-17.0356	-416.603		46.7	-100.654	-6832.55		46.7	-241.003	-1664.39
46.8	2.47384	1.64925	1.39606	1.0925		46.8	-1.2934	-4.94721	2.93723	-0.0479774		46.8	-35.534	-607.788		46.8	-43.9827	-2717.11		46.8	-856.581	-1363.72		46.8	-16.4129	-418.471		46.8	-105.636	-6819.48		46.8	-233.218	-1663.14
46.9	0.294174	1.64951	2.95302	1.40398		46.9	-0.0480042	-5.56991	2.00345	-1.60497		46.9	-36.4681	-613.082		46.9	-44.9168	-2712.44		46.9	-859.072	-1355.62		46.9	-15.4787	-426.256		46.9	-108.438	-6806.09		46.9	-229.793	-1665.32
47	-1.57411	1.96114	1.08479	2.96095		47	-2.5392	-2.76741	1.38106	0.5746		47	-38.025	-612.459		47	-47.4078	-2705.9		47	-853.779	-1349.39		47	-14.856	-430.304		47	-116.534	-6814.18		47	-228.548	-1666.57
47.1	-1.57411	1.9614	0.150711	1.09276		47.1	2.44275	-3.07872	0.758664	-0.0482531		47.1	-33.3543	-609.034		47.1	-46.7851	-2706.21		47.1	-855.958	-1342.85		47.1	-12.9877	-440.891		47.1	-109.373	-6803.6		47.1	-230.104	-1666.57
47.2	4.03074	0.0933533	2.33044	2.64975		47.2	-0.98259	-3.70142	1.07041	1.19718		47.2	-34.5998	-605.92		47.2	-44.294	-2699.05		47.2	-851.911	-1331.02		47.2	-15.1674	-444.316		47.2	-106.57	-6801.1		47.2	-232.284	-1648.51
47.3	6.2104	-0.217773	3.26465	0.158783		47.3	-0.359985	-3.07859	1.07078	-0.359818		47.3	-38.025	-603.74		47.3	-45.2282	-2693.75		47.3	-851.288	-1333.82		47.3	-18.2812	-431.549		47.3	-94.1149	-6805.15		47.3	-233.841	-1652.56
47.4	5.89902	0.0938568	2.64194	1.40439		47.4	1.50816	0.969427	-2.04266	-0.982671		47.4	-40.8274	-601.56		47.4	-41.803	-2695.62		47.4	-851.599	-1342.85		47.4	-15.1674	-425.01		47.4	-100.343	-6798.3		47.4	-234.464	-1643.84
47.5	-1.88549	-0.840027	2.642	1.71585		47.5	0.262482	-1.21017	-1.41953	0.57414		47.5	-40.8274	-600.938		47.5	-43.9827	-2698.74		47.5	-849.731	-1333.51		47.5	-16.1015	-430.615		47.5	-95.6718	-6783.04		47.5	-234.775	-1641.04
47.6	3.0966	2.27402	2.64206	0.470398		47.6	-0.671799	-5.56943	1.69464	2.13095		47.6	-38.025	-600.004		47.6	-48.0306	-2703.41		47.6	-859.072	-1334.76		47.6	-17.6584	-441.202		47.6	-91.3125	-6785.85		47.6	-234.152	-1641.04
47.7	-1.26273	1.96291	2.64212	1.71602		47.7	3.06462	-4.9466	1.69501	-0.671566		47.7	-38.3364	-599.692		47.7	-42.4258	-2690.64		47.7	-860.006	-1353.75		47.7	-14.856	-433.106		47.7	-95.0491	-6792.07		47.7	-237.578	-1642.9
47.8	-3.13101	-0.216522	2.64218	2.02747		47.8	0.573441	-3.07825	1.07262	-0.671659		47.8	-37.7136	-604.674		47.8	-43.9827	-2683.48		47.8	-853.467	-1364.96		47.8	-17.347	-429.058		47.8	-99.4084	-6769.65		47.8	-231.973	-1644.77
47.9	-3.75378	2.27478	0.462585	1.0934		47.9	5.55537	-5.25785	-0.483921	-1.29451		47.9	-36.1567	-614.638		47.9	-39.9347	-2684.1		47.9	-853.156	-1368.39		47.9	-15.7901	-419.405		47.9	-105.325	-6758.44		47.9	-232.907	-1648.2
48	-0.639969	1.3409	1.70818	0.159363		48	2.44142	-7.43745	0.761969	-0.360461		48	-38.025	-618.064		48	-44.9168	-2688.15		48	-848.174	-1350.33		48	-19.8381	-411.932		48	-105.947	-6744.12		48	-228.236	-1647.26
48.1	2.78522	0.718384	2.64236	0.47081		48.1	7.73476	-3.70081	1.3851	-1.2947		48.1	-35.8453	-617.13		48.1	-43.3599	-2689.39		48.1	-840.078	-1357.49		48.1	-17.6584	-422.83		48.1	-106.882	-6708.31		48.1	-225.745	-1646.02
48.2	-2.19687	1.3414	0.774155	0.782288		48.2	6.1777	-6.81455	1.69685	-2.22893		48.2	-34.2884	-612.459		48.2	-39.3119	-2688.46		48.2	-843.815	-1349.39		48.2	-16.4129	-420.028		48.2	-106.259	-6688.7		48.2	-230.727	-1645.4
48.3	1.22831	1.65303	1.0856	1.09373		48.3	4.62065	-3.3893	0.763071	2.44169		48.3	-35.2226	-606.854		48.3	-40.8688	-2687.84		48.3	-848.485	-1351.26		48.3	-14.856	-410.064		48.3	-106.259	-6700.84		48.3	-235.398	-1638.23
48.4	-0.951347	-0.526382	2.33119	2.33934		48.4	-1.6071	-4.32337	0.763438	3.06436		48.4	-36.4681	-600.004		48.4	-43.6713	-2695.93		48.4	-852.845	-1371.19		48.4	-16.7243	-410.998		48.4	-108.75	-6702.08		48.4	-230.727	-1642.28
48.5	3.40798	1.96492	2.01987	2.65082		48.5	-5.6552	-5.25745	0.763805	1.19598		48.5	-38.3364	-602.495		48.5	-41.1802	-2698.11		48.5	-854.713	-1376.17		48.5	-14.2332	-419.405		48.5	-107.504	-6682.78		48.5	-230.104	-1643.53
48.6	-0.328587	3.21068	2.95407	-1.08568		48.6	-4.09845	-2.45495	1.69831	-0.0496325		48.6	-37.0909	-610.902		48.6	-37.4437	-2674.14		48.6	-850.976	-1362.78		48.6	-14.2332	-417.226		48.6	-100.965	-6676.24		48.6	-227.925	-1643.84
48.7	-0.639969	1.96542	2.64275	0.782684		48.7	-1.60753	-4.01179	2.9442	-1.29525		48.7	-38.6478	-603.429		48.7	-36.1981	-2672.89		48.7	-844.437	-1361.54		48.7	-14.856	-409.441		48.7	-99.097	-6691.19		48.7	-234.464	-1641.35
48.8	-2.81963	1.65428	2.02005	2.02829		48.8	-1.60768	-3.38896	1.69905	-1.60672		48.8	-37.0909	-609.034		48.8	-40.5575	-2671.96		48.8	-840.078	-1371.19		48.8	-12.0535	-415.98		48.8	-101.277	-6690.88		48.8	-232.596	-1637.3
48.9	-7.80172	1.34317	1.08597	0.160095		48.9	-1.29646	-1.83199	0.142513	2.12976		48.9	-36.7795	-612.147		48.9	-43.9827	-2672.89		48.9	-837.898	-1362.47		48.9	-15.7901	-422.519		48.9	-110.929	-6672.81		48.9	-226.679	-1635.43
49	-6.24482	-1.14764	2.02017	1.40569		49	-4.4104	-4.94573	0.454261	3.06381		49	-33.9771	-607.788		49	-44.9168	-2682.54		49	-832.605	-1358.11		49	-15.1674	-418.471		49	-108.75	-6665.65		49	-227.302	-1641.04
49.1	-2.81963	1.65504	-0.159424	0.471634		49.1	0.571533	-4.3229	1.38877	0.261288		49.1	-38.3364	-601.872		49.1	-44.294	-2694.69		49.1	-837.587	-1356.24		49.1	-13.2991	-417.537		49.1	-101.588	-6682.47		49.1	-226.679	-1641.97
49.2	-1.88549	0.721146	-0.470749	0.160339		49.2	3.99658	-4.01145	0.766376	-0.361565		49.2	-37.4022	-590.974		49.2	-45.2282	-2701.54		49.2	-840.389	-1360.29		49.2	-9.25112	-407.261		49.2	-98.1629	-6689.63		49.2	-231.661	-1627.34
49.3	-0.328587	0.410034	1.3976	0.783188		49.3	3.37367	-1.83172	-0.47878	-0.361657		49.3	-36.7795	-601.249		49.3	-50.2103	-2701.54		49.3	-828.557	-1365.58		49.3	-13.6104	-397.609		49.3	-87.2646	-6653.2		49.3	-231.661	-1621.73
49.4	-0.0172081	-1.76939	-0.470627	1.71741		49.4	0.25972	-1.52027	1.38987	-1.91865		49.4	-38.6478	-600.938		49.4	-52.7013	-2688.77		49.4	-824.509	-1355.93		49.4	-13.9218	-402.902		49.4	-90.3784	-6651.02		49.4	-231.039	-1616.75
49.5	-0.639969	1.96744	2.33186	3.27438		49.5	-5.96803	-0.897442	1.39024	-1.29598		49.5	-37.7136	-602.495		49.5	-53.0127	-2688.77		49.5	-827.311	-1361.85		49.5	-8.0056	-402.591		49.5	-89.1328	-6652.26		49.5	-226.679	-1609.59
49.6	-0.951347	1.03354	1.70917	0.783432		49.6	-3.16576	-3.6998	1.07923	0.260828		49.6	-39.8933	-608.411		49.6	-56.1265	-2694.38		49.6	-835.719	-1373.06		49.6	-7.38284	-409.752		49.6	-89.7556	-6648.53		49.6	-224.5	-1603.98
49.7	-0.639969	1.65656	1.08646	0.472122		49.7	-4.10005	-3.38836	0.145451	-1.29617		49.7	-38.6478	-606.854		49.7	-58.6175	-2690.02		49.7	-826.689	-1363.4		49.7	-10.1853	-402.279		49.7	-88.5101	-6650.08		49.7	-226.057	-1600.25
49.8	-2.50825	-0.522858	2.64342	1.71773		49.8	-3.47743	-2.76552	0.145818	-0.984878		49.8	-38.3364	-600.004		49.8	-52.3899	-2687.53		49.8	-820.15	-1343.16		49.8	-10.808	-392.938		49.8	-83.8394	-6642.3		49.8	-222.009	-1596.2
49.9	-0.0172081	1.34569	2.64348	1.09505		49.9	-1.29791	-1.83132	2.01447	-0.050828		49.9	-38.025	-606.231		49.9	-53.0127	-2677.56		49.9	-825.755	-1357.18		49.9	-16.4129	-390.135		49.9	-81.9711	-6645.41		49.9	-228.859	-1599
50	0.916935	2.28006	0.775284	0.783752		50	0.881607	-2.14263	-2.96725	2.75151		50	-38.025	-595.333		50	-44.9168	-2668.84		50	-816.413	-1359.67		50	-17.0356	-393.561		50	-86.019	-6632.96		50	-225.434	-1606.47
50.1	-3.75378	0.100662	0.775345	0.472458		50.1	-0.0526733	-2.14256	1.39244	1.81727		50.1	-38.025	-595.956		50.1	-46.7851	-2676.32		50.1	-816.724	-1356.55		50.1	-16.4129	-396.674		50.1	-87.8873	-6612.72		50.1	-222.009	-1614.26
50.2	-1.57411	2.90334	2.02092	-0.150223		50.2	-1.60973	-1.83111	1.39281	2.43994		50.2	-37.0909	-594.71		50.2	-44.6054	-2679.43		50.2	-819.216	-1350.01		50.2	-15.1674	-394.806		50.2	-83.528	-6613.96		50.2	-230.416	-1616.75
50.3	-2.19687	2.28082	1.39822	-0.150146		50.3	-2.85539	-4.63347	2.95008	-0.0511956		50.3	-33.9771	-587.237		50.3	-43.0485	-2674.76		50.3	-821.084	-1359.04		50.3	-16.7243	-397.92		50.3	-85.0849	-6620.19		50.3	-229.793	-1614.88
50.4	-3.44239	1.9697	1.70967	1.09546		50.4	-4.41245	-1.5196	1.08216	-0.674049		50.4	-38.9591	-591.596		50.4	-47.4078	-2685.97		50.4	-824.198	-1357.49		50.4	-14.856	-388.579		50.4	-85.7077	-6615.83		50.4	-231.039	-1611.14
50.5	-0.328587	0.724426	1.08696	-0.461365		50.5	0.88089	-3.07643	1.70529	-0.674141		50.5	-39.5819	-604.363		50.5	-48.342	-2683.17		50.5	-820.772	-1353.13		50.5	-14.2332	-396.363		50.5	-86.6418	-6634.2		50.5	-231.661	-1610.52
50.6	-4.06516	-0.209473	0.464264	0.784241		50.6	1.50349	-3.69913	-1.09677	0.88267		50.6	-38.6478	-612.459		50.6	-50.5216	-2672.89		50.6	-814.233	-1351.26		50.6	-15.1674	-401.345		50.6	-90.6898	-6626.73		50.6	-232.907	-1607.41
50.7	-6.24482	1.03632	-0.781204	1.71848		50.7	-0.987701	-4.94458	0.771884	0.259817		50.7	-38.3364	-608.411		50.7	-47.7192	-2662.93		50.7	-819.527	-1346.59		50.7	-16.1015	-397.92		50.7	-84.7735	-6624.86		50.7	-226.679	-1600.56
50.8	-2.50825	1.65932	-0.469757	0.784409		50.8	-0.365082	-2.14209	1.39501	-0.674417		50.8	-36.4681	-600.626		50.8	-42.4258	-2658.26		50.8	-821.707	-1337.56		50.8	-18.9039	-398.854		50.8	-73.8752	-6620.5		50.8	-227.613	-1606.78
50.9	-3.13101	1.34821	1.70998	0.161728		50.9	-1.92213	-2.76478	-1.40705	0.259633		50.9	-37.4022	-596.267		50.9	-44.6054	-2663.55		50.9	-823.886	-1333.82		50.9	-14.2332	-408.507		50.9	-76.6776	-6623.31		50.9	-227.302	-1617.99
51	-2.81963	1.65982	-0.158249	0.161819		51	-7.21574	-2.76472	-1.0953	-0.985981		51	-38.3364	-606.543		51	-44.294	-2664.8		51	-813.922	-1343.48		51	-10.4966	-405.393		51	-74.8093	-6649.46		51	-222.631	-1617.06
51.1	-1.88549	0.414566	1.08733	0.473267		51.1	-5.03622	-0.896364	0.773353	2.43911		51.1	-38.6478	-612.147		51.1	-45.2282	-2661.99		51.1	-810.186	-1343.79		51.1	-13.6104	-402.902		51.1	-71.3841	-6653.82		51.1	-222.943	-1617.99
51.2	0.294174	-0.207962	0.46463	0.161987		51.2	-4.4136	-2.76458	-0.160421	0.259357		51.2	-38.3364	-615.573		51.2	-43.6713	-2663.86		51.2	-813.299	-1335.38		51.2	-8.93974	-408.507		51.2	-65.4679	-6634.52		51.2	-220.14	-1612.7
51.3	-1.26273	0.103683	-0.780838	-0.149323		51.3	-3.47961	-2.14175	1.39685	-1.60902		51.3	-38.6478	-622.112		51.3	-43.9827	-2664.17		51.3	-800.533	-1329.77		51.3	-8.31698	-409.441		51.3	-65.7793	-6620.19		51.3	-220.14	-1601.8
51.4	-0.328587	1.03807	1.3989	-0.149246		51.4	-4.7253	-1.51892	-2.33935	-0.674969		51.4	-38.025	-628.962		51.4	-49.5875	-2670.09		51.4	-793.371	-1348.46		51.4	-11.1194	-420.651		51.4	-67.0248	-6608.67		51.4	-220.452	-1593.71
51.5	-2.50825	0.415573	1.71034	-0.771912		51.5	-6.90509	0.0380459	-1.09346	-1.6092		51.5	-38.025	-623.98		51.5	-54.2582	-2674.45		51.5	-796.485	-1345.03		51.5	-10.4966	-427.501		51.5	-74.8093	-6624.55		51.5	-218.895	-1598.07
51.6	4.6535	0.727188	-0.469254	1.09644		51.6	-3.48006	-0.273268	-1.40447	1.19313		51.6	-41.1388	-623.98		51.6	-51.7672	-2671.96		51.6	-803.024	-1350.95		51.6	-14.2332	-417.848		51.6	-87.2646	-6629.84		51.6	-224.811	-1604.29
51.7	6.52179	0.727432	1.08771	1.09651		51.7	-12.1989	-1.8301	0.464176	1.19304		51.7	-40.516	-614.327		51.7	-43.9827	-2672.27		51.7	-799.599	-1359.04		51.7	-15.4787	-413.489		51.7	-99.4084	-6632.02		51.7	-221.697	-1599
51.8	-0.328587	1.97322	-0.469131	-0.148911		51.8	-9.70796	-2.76418	-0.158218	-1.92086		51.8	-35.8453	-609.034		51.8	-42.7371	-2663.24		51.8	-799.599	-1371.19		51.8	-18.5925	-414.423		51.8	-95.3605	-6638.25		51.8	-219.829	-1602.74
51.9	-2.50825	-0.206207	0.465073	-1.70573		51.9	-7.21706	-2.45273	0.464911	0.570094		51.9	-38.9591	-608.722		51.9	-45.8509	-2672.58		51.9	-797.419	-1367.76		51.9	-21.395	-405.705		51.9	-88.1987	-6633.27		51.9	-220.14	-1619.24
52	-0.0172081	-0.517319	2.02203	1.09677		52	-6.59445	-1.20714	-1.71439	-0.0527587		52	-38.3364	-597.824		52	-45.2282	-2672.58		52	-806.138	-1356.86		52	-19.2153	-403.213		52	-85.3963	-6627.35		52	-217.027	-1616.44
52.1	2.16246	0.728439	-3.27138	-0.460052		52.1	-1.61249	-4.94364	-1.71402	1.19267		52.1	-35.8453	-588.171		52.1	-40.5575	-2672.58		52.1	-799.599	-1353.75		52.1	-15.1674	-406.95		52.1	-83.8394	-6642.3		52.1	-219.518	-1608.03
52.2	2.47384	0.728699	2.64491	-2.01688		52.2	-0.367126	-1.20701	-1.71365	2.4381		52.2	-39.5819	-581.009		52.2	-42.7371	-2661.99		52.2	-790.257	-1362.78		52.2	-16.7243	-405.705		52.2	-71.3841	-6614.9		52.2	-221.386	-1606.47
52.3	5.89902	-1.7621	-1.09158	-1.39403		52.3	-1.30142	-0.584173	-0.467762	1.19249		52.3	-42.3843	-580.387		52.3	-46.4737	-2676.63		52.3	-800.221	-1351.26		52.3	-16.7243	-404.459		52.3	-71.6955	-6614.9		52.3	-218.583	-1609.28
52.4	4.6535	1.66335	0.465378	1.40848		52.4	1.50087	-3.07515	0.466747	0.258254		52.4	-41.1388	-589.728		52.4	-43.6713	-2672.27		52.4	-800.844	-1336		52.4	-18.5925	-410.998		52.4	-78.2345	-6627.35		52.4	-225.122	-1607.41
52.5	3.40798	2.59773	0.465439	0.16304		52.5	2.12347	-0.58404	-2.95807	2.12645		52.5	-41.1388	-595.956		52.5	-43.6713	-2676.32		52.5	-794.305	-1334.45		52.5	-15.7901	-403.525		52.5	-83.8394	-6621.75		52.5	-220.452	-1598.38
52.6	4.34212	2.90938	-0.468643	-2.6393		52.6	3.05748	-1.20674	-0.46666	-1.29883		52.6	-43.0071	-596.578		52.6	-40.2461	-2674.14		52.6	-786.832	-1337.25		52.6	-13.9218	-395.118		52.6	-88.5101	-6626.42		52.6	-219.829	-1593.39
52.7	3.40798	0.72995	0.776947	-0.459564		52.7	2.43457	-3.69771	1.09061	1.19212		52.7	-40.2047	-599.381		52.7	-42.7371	-2659.19		52.7	-792.437	-1339.12		52.7	-15.7901	-391.07		52.7	-90.3784	-6618.32		52.7	-221.074	-1594.64
52.8	2.16246	-1.13808	-1.40266	-0.459488		52.8	-0.367996	-4.32041	-1.40007	-0.364875		52.8	-39.5819	-593.465		52.8	-41.4916	-2652.34		52.8	-797.108	-1340.05		52.8	-20.1494	-403.213		52.8	-90.6898	-6610.54		52.8	-220.763	-1591.84
52.9	-0.328587	-0.51506	-0.779846	-3.26183		52.9	3.67979	-4.00896	-3.26798	-0.676348		52.9	-38.6478	-597.201		52.9	-40.8688	-2662.62		52.9	-794.617	-1342.54		52.9	-14.2332	-403.525		52.9	-84.7735	-6617.08		52.9	-220.14	-1598.07
53	9.01283	2.28761	-2.64806	1.40897		53	3.0569	-1.82923	0.46895	2.12599		53	-43.6299	-595.956		53	-37.4437	-2664.48		53	-793.994	-1342.85		53	-14.856	-404.77		53	-86.6418	-6640.43		53	-217.338	-1608.96
53.1	3.71936	0.1082	0.465805	-2.32751		53.1	0.254318	-3.07468	-0.464825	0.880371		53.1	-42.3843	-597.824		53.1	-39.3119	-2657.32		53.1	-797.419	-1338.49		53.1	-18.5925	-412.555		53.1	-74.8093	-6635.76		53.1	-220.763	-1619.24
53.2	0.916935	-0.825684	-1.40242	0.16362		53.2	0.565552	-1.82909	-2.33274	-0.365243		53.2	-45.1868	-599.381		53.2	-40.8688	-2661.99		53.2	-798.353	-1351.88		53.2	-17.347	-416.291		53.2	-67.959	-6616.46		53.2	-222.009	-1624.84
53.3	4.34212	1.04285	-2.0251	0.475067		53.3	-2.85977	-3.69731	0.158672	2.12571		53.3	-41.1388	-606.854		53.3	-40.8688	-2666.04		53.3	-801.778	-1363.72		53.3	-14.2332	-409.441		53.3	-64.2224	-6603.69		53.3	-222.631	-1630.45
53.4	6.52179	1.04311	-0.156754	-1.39313		53.4	4.30183	-0.894815	-2.02063	1.81424		53.4	-46.7437	-604.363		53.4	-36.5095	-2664.17		53.4	-791.814	-1365.27		53.4	-15.7901	-412.244		53.4	-67.3362	-6607.11		53.4	-221.074	-1632.32
53.5	5.27626	0.420593	-0.468079	0.163864		53.5	3.36755	0.973536	-1.08612	-0.365519		53.5	-47.3664	-605.608		53.5	-39.3119	-2663.24		53.5	-783.095	-1370.25		53.5	-15.4787	-412.244		53.5	-65.1565	-6589.99		53.5	-215.47	-1623.91
53.6	4.96488	1.04361	-0.779404	-0.458832		53.6	3.99016	-1.20606	-1.39713	0.568531		53.6	-46.1209	-614.327		53.6	-40.2461	-2673.83		53.6	-785.586	-1375.86		53.6	-16.1015	-397.297		53.6	-63.2883	-6569.44		53.6	-217.961	-1628.27
53.7	8.39007	-1.75858	-1.71349	-3.57254		53.7	5.23555	-3.38566	-0.15124	0.568439		53.7	-46.7437	-609.656		53.7	-39.3119	-2676.63		53.7	-785.586	-1371.5		53.7	-16.4129	-392.627		53.7	-57.6834	-6563.83		53.7	-216.715	-1624.22
53.8	8.70145	0.732727	-1.40204	-1.08142		53.8	3.36711	-1.51731	-1.70778	0.256966		53.8	-44.8754	-596.89		53.8	-39.3119	-2669.47		53.8	-794.617	-1366.52		53.8	-12.0535	-391.07		53.8	-66.4021	-6569.13		53.8	-215.47	-1620.8
53.9	10.8811	-0.512543	-0.467834	-3.261		53.9	3.05559	-4.94242	-2.64155	0.879636		53.9	-43.0071	-588.483		53.9	-37.4437	-2667.29		53.9	-792.125	-1374.3		53.9	-11.1194	-397.297		53.9	-70.45	-6552.31		53.9	-213.29	-1614.88
54	7.45593	-2.38057	-2.64743	0.164276		54	0.564392	-2.76269	-1.39566	0.568163		54	-46.4323	-597.513		54	-39.0006	-2670.71		54	-792.125	-1364.65		54	-13.2991	-395.74		54	-73.2524	-6538.3		54	-208.931	-1618.93
54.1	7.45593	1.35625	-3.58151	-0.147034		54.1	-5.35199	1.90808	-0.149771	1.81359		54.1	-47.9892	-603.74		54.1	-41.1802	-2660.44		54.1	-781.85	-1348.46		54.1	-14.2332	-396.986		54.1	-81.3483	-6546.08		54.1	-212.979	-1613.01
54.2	5.89902	-1.13455	-2.33594	2.03271		54.2	-3.79523	-0.271515	-3.26321	1.19074		54.2	-44.8754	-598.135		54.2	-44.9168	-2660.12		54.2	-783.407	-1350.33		54.2	-15.1674	-387.956		54.2	-83.2166	-6559.78		54.2	-216.404	-1610.52
54.3	9.01283	0.111221	-2.02449	-2.32654		54.3	-3.17262	0.0399323	-2.64008	0.256506		54.3	-47.3664	-598.135		54.3	-48.342	-2657.95		54.3	-785.898	-1359.98		54.3	-14.2332	-376.435		54.3	-79.48	-6558.85		54.3	-220.14	-1606.78
54.4	9.32421	0.422867	-2.33582	-1.08093		54.4	-2.23862	-0.271381	0.474092	0.567795		54.4	-47.055	-595.021		54.4	-52.3899	-2659.19		54.4	-778.425	-1354.06		54.4	-15.4787	-374.566		54.4	-79.7914	-6563.21		54.4	-217.338	-1599
54.5	8.07869	-0.822418	-1.713	-2.32637		54.5	0.875046	-0.271313	-2.01659	3.05875		54.5	-45.8095	-591.285		54.5	-54.2582	-2658.57		54.5	-783.718	-1354.06		54.5	-17.6584	-380.794		54.5	-77.3004	-6556.67		54.5	-217.649	-1603.98
54.6	7.14455	0.111984	0.466736	-1.08076		54.6	-2.55028	0.974277	-2.3276	2.12451		54.6	-43.0071	-590.974		54.6	-63.5996	-2656.39		54.6	-786.521	-1350.64		54.6	-17.347	-372.387		54.6	-76.3662	-6550.44		54.6	-217.961	-1609.59
54.7	3.40798	1.04637	-0.15596	-2.94897		54.7	-1.30492	0.351582	-1.70447	-0.0552416		54.7	-41.7616	-588.483		54.7	-62.3541	-2659.5		54.7	-779.982	-1350.01		54.7	-15.4787	-360.243		54.7	-78.5459	-6562.27		54.7	-217.961	-1605.85
54.8	2.47384	-0.510269	-2.95833	-3.88303		54.8	1.18599	4.08822	-2.01548	3.68123		54.8	-43.3185	-591.908		54.8	-58.6175	-2669.47		54.8	-784.341	-1359.98		54.8	-16.7243	-364.291		54.8	-76.989	-6551.38		54.8	-221.386	-1602.74
54.9	4.03074	-1.75555	-0.155823	-2.01466		54.9	0.56308	0.663099	-3.26064	1.50148		54.9	-39.2705	-600.315		54.9	-57.9948	-2673.51		54.9	-784.964	-1363.4		54.9	-18.9039	-374.255		54.9	-75.7435	-6524.6		54.9	-223.566	-1599.93
55	3.0966	-0.509766	-4.20372	-1.08043		55	1.80846	-2.76202	-3.88303	3.36967		55	-47.6778	-599.069		55	-52.3899	-2669.78		55	-779.359	-1361.54		55	-20.1494	-379.86		55	-82.2825	-6516.5		55	-218.272	-1593.39
55.1	5.89902	-2.37781	-3.26952	-0.14621		55.1	-2.8624	-0.27091	-3.57129	3.36958		55.1	-46.1209	-587.237		55.1	-48.0306	-2672.58		55.1	-773.443	-1359.36		55.1	-18.5925	-375.812		55.1	-73.2524	-6517.75		55.1	-214.847	-1596.51
55.2	0.294174	-2.37755	-0.467026	-0.45752		55.2	-1.92841	-0.58222	-3.8823	1.5012		55.2	-47.3664	-591.908		55.2	-48.9647	-2685.66		55.2	-771.263	-1364.65		55.2	-21.395	-379.86		55.2	-67.0248	-6535.81		55.2	-212.667	-1601.8
55.3	-3.75378	-2.68869	1.71271	-2.32571		55.3	-1.92854	-2.45044	-2.01365	0.878348		55.3	-45.4981	-601.56		55.3	-49.2761	-2689.39		55.3	-770.952	-1359.98		55.3	-20.4608	-375.501		55.3	-64.2224	-6540.48		55.3	-212.356	-1604.92
55.4	-2.81963	-0.197388	-2.0238	-2.01425		55.4	2.74202	-0.893469	-3.57018	-0.990027		55.4	-42.6957	-604.052		55.4	-51.1444	-2678.5		55.4	-766.904	-1357.18		55.4	-12.6763	-377.057		55.4	-59.2403	-6539.86		55.4	-212.667	-1606.78
55.5	4.34212	-0.819901	-3.58064	-0.457275		55.5	4.29878	1.90903	-0.767391	1.50093		55.5	-43.6299	-601.249		55.5	-50.5216	-2679.43		55.5	-763.79	-1356.24		55.5	-18.5925	-386.088		55.5	-66.7134	-6525.53		55.5	-208.308	-1600.87
55.6	4.96488	-1.13103	0.467361	0.788345		55.6	4.29863	0.352188	1.10126	2.74636		55.6	-47.3664	-603.117		55.6	-52.0786	-2671.65		55.6	-765.035	-1360.91		55.6	-21.0836	-386.71		55.6	-68.2703	-6505.92		55.6	-211.11	-1601.18
55.7	4.34212	-2.68768	-1.71225	-0.145721		55.7	-0.683624	2.22054	0.167486	0.87798		55.7	-48.6119	-594.399		55.7	-48.0306	-2662.62		55.7	-766.281	-1370.25		55.7	-15.4787	-384.219		55.7	-64.8452	-6504.36		55.7	-206.751	-1604.6
55.8	1.22831	-1.44189	-0.778046	-3.25945		55.8	-2.55203	3.46613	-3.25733	0.566508		55.8	-49.5461	-587.237		55.8	-50.833	-2657.01		55.8	-767.215	-1377.42		55.8	-15.7901	-380.794		55.8	-63.911	-6497.82		55.8	-208.308	-1605.23
55.9	1.5397	-3.30994	-2.33488	0.165833		55.9	-4.73186	2.53205	-2.01144	1.18918		55.9	-50.4802	-588.171		55.9	-51.7672	-2662.93		55.9	-766.904	-1386.13		55.9	-19.8381	-389.824		55.9	-67.3362	-6498.75		55.9	-208.308	-1609.59
56	1.85108	-2.68692	-3.26897	-1.70238		56	-4.10924	-0.270304	-2.63384	1.18909		56	-48.6119	-594.087		56	-46.1623	-2663.24		56	-764.101	-1402.95		56	-20.4608	-399.166		56	-65.7793	-6514.32		56	-205.505	-1596.2
56.1	1.85108	-2.99805	-2.33476	-1.70229		56.1	-0.372818	0.0411453	1.1031	4.92556		56.1	-47.3664	-589.728		56.1	-47.4078	-2662.93		56.1	-761.299	-1394.23		56.1	-17.0356	-404.459		56.1	-67.3362	-6509.96		56.1	-209.553	-1594.02
56.2	4.03074	-1.44089	-2.02332	0.166077		56.2	-0.372955	-2.76121	1.10346	3.99133		56.2	-43.9412	-582.255		56.2	-47.4078	-2671.02		56.2	-758.808	-1382.4		56.2	-17.347	-393.561		56.2	-70.45	-6503.42		56.2	-212.667	-1591.53
56.3	-2.50825	-0.5065	-0.77774	-1.07938		56.3	-6.60072	-0.58148	-0.764453	4.30262		56.3	-42.6957	-579.452		56.3	-39.9347	-2679.74		56.3	-756.005	-1370.57		56.3	-20.4608	-392.627		56.3	-68.5817	-6495.64		56.3	-210.488	-1595.26
56.4	0.916935	-1.44038	1.40199	-3.88171		56.4	-10.3374	0.352728	-4.18927	3.057		56.4	-42.6957	-589.417		56.4	-39.0006	-2679.12		56.4	-754.76	-1367.14		56.4	-15.1674	-390.135		56.4	-57.0606	-6464.19		56.4	-207.996	-1595.57
56.5	4.96488	1.0509	-1.71176	0.166321		56.5	-9.40343	0.352795	-1.69786	2.74553		56.5	-37.7136	-598.447		56.5	-42.7371	-2679.12		56.5	-755.071	-1365.58		56.5	-24.1974	-387.644		56.5	-62.9769	-6459.83		56.5	-208.308	-1603.98
56.6	1.5397	-2.06265	-2.02306	-1.07913		56.6	-7.84668	1.287	-3.56578	0.877153		56.6	-39.5819	-596.89		56.6	-44.294	-2675.69		56.6	-749.466	-1370.57		56.6	-22.3291	-391.07		56.6	-63.2883	-6470.42		56.6	-204.571	-1609.59
56.7	5.27626	-1.12827	0.468048	-1.07904		56.7	-6.6013	1.28707	-3.25403	2.12258		56.7	-37.0909	-594.087		56.7	-45.5396	-2673.51		56.7	-752.58	-1362.78		56.7	-19.2153	-390.758		56.7	-67.3362	-6471.04		56.7	-205.817	-1604.92
56.8	7.14455	1.05167	0.468109	-0.456207		56.8	-11.2722	2.84404	-2.00814	-0.368553		56.8	-39.2705	-583.5		56.8	-41.1802	-2664.17		56.8	-756.005	-1357.49		56.8	-19.2153	-401.968		56.8	-66.7134	-6482.25		56.8	-203.949	-1598.69
56.9	2.78522	-1.75052	-1.40012	-1.39026		56.9	-11.8951	3.46687	-2.63053	0.254116		56.9	-45.4981	-577.273		56.9	-40.8688	-2666.98		56.9	-758.185	-1359.04		56.9	-20.4608	-405.082		56.9	-71.3841	-6482.56		56.9	-207.996	-1599
57	5.27626	-1.1275	-0.777298	2.34639		57	-8.47003	-1.20377	-2.31879	2.43369		57	-43.9412	-589.417		57	-38.6892	-2672.89		57	-767.526	-1375.86		57	-18.9039	-400.411		57	-72.9411	-6467.3		57	-209.865	-1598.38
57.1	2.47384	-3.92967	0.779678	1.41232		57.1	-7.8474	-2.13784	-1.38428	3.36774		57.1	-40.8274	-592.219		57.1	-37.755	-2674.14		57.1	-768.149	-1383.96		57.1	-23.5746	-390.758		57.1	-64.2224	-6477.27		57.1	-207.996	-1599
57.2	2.78522	-2.6839	-0.154404	-0.767242		57.2	-6.91341	1.59879	-2.94081	0.25384		57.2	-42.073	-581.632		57.2	-44.294	-2678.18		57.2	-757.251	-1380.53		57.2	-24.5088	-386.088		57.2	-65.7793	-6484.43		57.2	-207.685	-1605.85
57.3	4.03074	-1.12675	-2.02263	0.166977		57.3	-1.62007	-1.20357	-1.38354	1.49927		57.3	-39.8933	-584.123		57.3	-40.2461	-2676.32		57.3	-765.347	-1370.25		57.3	-22.3291	-391.692		57.3	-62.9769	-6472.29		57.3	-207.685	-1608.96
57.4	2.78522	1.67593	-3.2681	-3.25815		57.4	-0.37471	-5.25145	-1.69456	2.12194		57.4	-40.8274	-585.68		57.4	-41.4916	-2683.17		57.4	-759.43	-1373.06		57.4	-18.9039	-398.231		57.4	-56.4379	-6462.01		57.4	-204.571	-1596.2
57.5	5.89902	-1.74901	-1.08836	-1.07838		57.5	-6.91385	-3.07172	1.731	2.74461		57.5	-36.4681	-582.255		57.5	-43.0485	-2685.04		57.5	-755.383	-1368.07		57.5	-18.9039	-403.836		57.5	-56.1265	-6463.88		57.5	-204.571	-1598.38
57.6	6.52179	-2.99426	-2.02245	-1.38969		57.6	-6.60262	0.353535	-1.07106	2.43314		57.6	-38.025	-571.045		57.6	-46.4737	-2685.35		57.6	-759.119	-1365.27		57.6	-17.347	-408.818		57.6	-51.1444	-6481.63		57.6	-203.326	-1604.6
57.7	7.76731	-0.502975	-1.39963	-0.455475		57.7	-7.84828	-1.82606	-2.00483	2.74443		57.7	-37.7136	-570.422		57.7	-48.9647	-2683.79		57.7	-756.317	-1369.63		57.7	-18.9039	-405.082		57.7	-56.1265	-6486.61		57.7	-193.362	-1605.85
57.8	3.0966	1.36557	-1.71095	-1.07814		57.8	-0.0639038	-0.269091	-2.31585	2.74433		57.8	-35.8453	-571.357		57.8	-44.6054	-2688.15		57.8	-751.335	-1375.24		57.8	-18.5925	-403.213		57.8	-63.911	-6476.96		57.8	-195.541	-1613.32
57.9	-0.639969	1.36581	-1.39951	0.167465		57.9	1.80423	-2.44869	-3.24962	1.49872		57.9	-35.534	-568.866		57.9	-44.6054	-2668.84		57.9	-745.107	-1373.37		57.9	-15.1674	-395.74		57.9	-62.3541	-6473.22		57.9	-196.164	-1611.14
58	2.16246	1.98882	-0.776688	-1.70073		58	-1.93248	-1.51448	-2.93787	3.67829		58	-37.0909	-571.357		58	-39.9347	-2674.45		58	-748.532	-1371.81		58	-18.5925	-389.513		58	-64.2224	-6477.27		58	-195.541	-1600.25
58.1	-2.50825	0.432175	-0.776627	-0.455139		58.1	-5.6692	-1.20303	0.48768	4.30096		58.1	-37.7136	-575.716		58.1	-43.3599	-2676.94		58.1	-753.514	-1353.44		58.1	-15.1674	-403.213		58.1	-57.0606	-6478.2		58.1	-197.721	-1600.56
58.2	-1.26273	0.121033	-1.71069	0.167709		58.2	-7.22624	-0.891582	-2.31438	3.98949		58.2	-38.6478	-575.405		58.2	-49.5875	-2676.01		58.2	-757.251	-1357.49		58.2	-16.4129	-403.213		58.2	-55.8151	-6500.93		58.2	-198.344	-1607.72
58.3	-1.26273	-3.92665	-1.39925	-1.38911		58.3	-5.98087	-0.268753	-2.31401	-0.369932		58.3	-40.2047	-581.944		58.3	-48.9647	-2682.23		58.3	-750.089	-1355		58.3	-14.2332	-396.986		58.3	-61.1086	-6494.39		58.3	-199.901	-1611.77
58.4	3.40798	0.744293	-4.20161	-0.143509		58.4	-5.04688	1.28822	-3.87055	0.564117		58.4	-40.8274	-588.171		58.4	-48.9647	-2682.23		58.4	-739.813	-1356.24		58.4	-13.6104	-396.363		58.4	-53.3241	-6484.74		58.4	-201.457	-1615.5
58.5	-2.19687	-1.74649	-1.08774	0.479324		58.5	-0.999069	0.0427608	-2.31328	1.49817		58.5	-36.7795	-584.746		58.5	-53.6355	-2665.42		58.5	-741.059	-1370.88		58.5	-15.1674	-395.74		58.5	-58.6175	-6478.83		58.5	-201.769	-1617.68
58.6	-0.639969	-4.54868	-1.71045	-0.143341		58.6	-3.80165	-4.93926	-4.18119	1.49808		58.6	-34.2884	-578.518		58.6	-50.833	-2659.19		58.6	-749.466	-1358.11		58.6	-16.4129	-398.854		58.6	-64.5338	-6468.24		58.6	-197.098	-1608.65
58.7	1.22831	0.745056	-0.464859	0.168121		58.7	-5.0473	-3.38229	-3.55806	3.36627		58.7	-33.9771	-573.848		58.7	-47.4078	-2656.7		58.7	-753.203	-1354.69		58.7	-14.2332	-388.89		58.7	-71.0728	-6464.5		58.7	-194.296	-1603.05
58.8	1.5397	-5.79369	-1.39894	-2.63422		58.8	-4.73608	-2.44808	-2.00079	3.67756		58.8	-35.534	-571.357		58.8	-45.2282	-2671.65		58.8	-739.502	-1364.34		58.8	-10.808	-383.596		58.8	-75.1207	-6467.3		58.8	-196.475	-1600.56
58.9	3.0966	-1.74548	-0.464737	1.10242		58.9	-5.04759	0.0430317	1.42476	0.563657		58.9	-34.9112	-581.009		58.9	-48.342	-2682.86		58.9	-737.011	-1371.19		58.9	-11.1194	-384.842		58.9	-75.1207	-6473.22		58.9	-199.278	-1601.8
59	3.71936	1.67995	-0.15329	-0.454407		59	-3.17947	-2.44795	2.04789	-0.993338		59	-35.534	-590.974		59	-50.5216	-2680.36		59	-743.239	-1353.13		59	-15.1674	-389.513		59	-74.498	-6450.49		59	-194.607	-1604.92
59.1	1.85108	1.05745	-3.26704	0.479828		59.1	-1.31134	-3.38202	-1.68831	-0.682049		59.1	-35.8453	-594.087		59.1	-48.0306	-2671.96		59.1	-736.077	-1343.48		59.1	-15.4787	-383.285		59.1	-75.1207	-6418.73		59.1	-188.691	-1614.88
59.2	5.89902	1.68045	-0.77594	1.10266		59.2	-2.24562	-3.69333	-1.37656	0.252001		59.2	-33.3543	-593.153		59.2	-45.8509	-2657.95		59.2	-743.861	-1341.92		59.2	-16.1015	-375.189		59.2	-73.8752	-6400.36		59.2	-194.918	-1618.31
59.3	5.89902	-3.61276	-3.57829	1.10274		59.3	-4.42543	-2.75912	-1.3762	1.18605		59.3	-36.1567	-593.465		59.3	-43.0485	-2670.4		59.3	-747.598	-1347.21		59.3	-17.347	-362.423		59.3	-67.0248	-6405.34		59.3	-199.278	-1622.04
59.4	-0.0172081	-1.12148	-0.775818	1.10283		59.4	-4.73695	-1.20216	-1.06445	2.43148		59.4	-33.9771	-587.237		59.4	-41.4916	-2678.5		59.4	-747.909	-1352.19		59.4	-16.7243	-355.884		59.4	-60.1744	-6419.97		59.4	-195.541	-1612.08
59.5	-4.9993	-3.61226	0.158386	-0.142609		59.5	-4.73711	0.666197	-1.68684	1.18587		59.5	-35.2226	-582.878		59.5	-42.4258	-2676.01		59.5	-736.077	-1351.57		59.5	-12.9877	-361.8		59.5	-62.0427	-6434.3		59.5	-187.757	-1612.39
59.6	-7.17896	-3.61201	-1.70984	0.168854		59.6	1.17899	-0.267878	-2.30924	3.05406		59.6	-38.9591	-572.291		59.6	-43.3599	-2681.92		59.6	-735.766	-1350.01		59.6	-10.808	-364.914		59.6	-63.2883	-6445.2		59.6	-189.936	-1618.62
59.7	-2.19687	-0.186569	-2.33253	0.480316		59.7	-5.67154	0.977713	0.804936	4.61087		59.7	-37.4022	-575.716		59.7	-43.6713	-2684.1		59.7	-731.718	-1345.66		59.7	-13.6104	-367.405		59.7	-66.7134	-6439.28		59.7	-191.493	-1618.31
59.8	-1.57411	0.747818	-2.02109	0.791779		59.8	0.555939	0.0436363	-0.128839	3.05387		59.8	-37.4022	-575.405		59.8	-46.1623	-2685.97		59.8	-731.095	-1351.88		59.8	-12.6763	-369.584		59.8	-62.3541	-6421.84		59.8	-189.002	-1612.08
59.9	-0.0172081	0.12532	-0.775497	0.480484		59.9	3.66959	-3.0701	-1.68537	1.1855		59.9	-38.3364	-573.848		59.9	-46.1623	-2678.18		59.9	-727.047	-1359.04		59.9	-14.2332	-368.339		59.9	-62.3541	-6416.86		59.9	-188.691	-1619.86
60	2.16246	-0.808578	-2.95509	-1.07634		60	2.42392	-1.20175	-2.30777	1.80817		60	-37.7136	-578.518		60	-47.7192	-2683.17		60	-730.472	-1354.37		60	-13.6104	-358.686		60	-60.1744	-6436.48		60	-189.936	-1618.62
60.1	-0.639969	-2.98798	-2.95503	1.41478		60.1	-3.18108	-0.890303	-1.68464	0.251173		60.1	-38.3364	-580.387		60.1	-50.5216	-2690.64		60.1	-728.915	-1347.83		60.1	-13.6104	-356.506		60.1	-59.2403	-6457.03		60.1	-192.116	-1615.81
60.2	-0.328587	-1.74222	-0.775314	0.792114		60.2	-3.18123	-1.51299	-2.61841	2.43075		60.2	-39.2705	-581.009		60.2	-48.342	-2677.87		60.2	-729.538	-1354.37		60.2	-16.4129	-355.884		60.2	-70.1386	-6454.23		60.2	-191.805	-1612.39
60.3	1.22831	-2.36472	1.09303	-0.453339		60.3	3.35764	-2.44707	-1.99529	2.11927		60.3	-37.0909	-582.878		60.3	-49.5875	-2670.09		60.3	-722.688	-1351.57		60.3	-13.6104	-359.932		60.3	-68.2703	-6446.13		60.3	-185.266	-1615.81
60.4	2.16246	-1.74171	-2.02071	1.72641		60.4	-0.379089	-2.75838	-2.61768	1.49642		60.4	-34.2884	-580.698		60.4	-47.4078	-2670.71		60.4	-718.64	-1356.86		60.4	-8.0056	-356.506		60.4	-71.0728	-6450.18		60.4	-189.002	-1617.68
60.5	0.916935	-1.74146	0.781784	-0.141785		60.5	2.4232	-4.6266	-0.749029	3.05323		60.5	-36.4681	-575.093		60.5	-43.9827	-2656.7		60.5	-723.933	-1355.62		60.5	-9.5625	-358.686		60.5	-71.3841	-6451.73		60.5	-185.888	-1620.48
60.6	-0.0172081	-1.74121	-1.70921	-0.453094		60.6	2.73444	-0.889965	-0.437281	1.18486		60.6	-35.2226	-580.387		60.6	-45.5396	-2649.54		60.6	-718.328	-1363.09		60.6	-10.1853	-375.189		60.6	-80.7256	-6443.02		60.6	-185.266	-1615.81
60.7	-0.0172081	-0.495422	0.781906	1.41528		60.7	2.42291	-2.13542	-1.05967	3.05305		60.7	-34.2884	-589.417		60.7	-48.342	-2644.56		60.7	-708.364	-1369.63		60.7	-10.4966	-396.052		60.7	-80.1028	-6430.25		60.7	-183.086	-1611.77
60.8	-3.44239	-1.42932	-1.08632	-0.452927		60.8	2.73415	-3.38088	-0.125166	2.43019		60.8	-35.2226	-590.351		60.8	-51.7672	-2644.24		60.8	-713.969	-1352.51		60.8	-7.38284	-397.92		60.8	-77.6118	-6423.71		60.8	-185.888	-1616.44
60.9	-1.26273	0.439224	-0.463501	-0.141464		60.9	3.66812	-6.18324	-0.124799	2.11872		60.9	-31.486	-588.794		60.9	-47.4078	-2638.95		60.9	-712.101	-1340.67		60.9	-11.7422	-398.231		60.9	-84.7735	-6420.6		60.9	-189.625	-1617.37
61	-0.639969	-0.494675	-0.774826	0.481384		61	-2.24825	-3.69212	-2.61548	1.18449		61	-31.7974	-582.566		61	-48.0306	-2638.95		61	-708.987	-1333.82		61	-12.0535	-388.579		61	-138.331	-6410.94		61	-194.296	-1610.83
61.1	1.5397	-0.183044	-2.33167	0.792847		61.1	-0.0687256	-1.20101	0.810078	0.873015		61.1	-33.9771	-581.944		61.1	-47.4078	-2639.57		61.1	-703.071	-1339.43		61.1	-6.76008	-377.369		61.1	-152.966	-6405.65		61.1	-187.757	-1607.72
61.2	0.916935	-2.05109	0.782211	2.03844		61.2	0.242508	-2.75784	1.12183	2.11845		61.2	-29.9291	-588.171		61.2	-47.4078	-2647.98		61.2	-704.939	-1351.26		61.2	-5.51455	-374.566		61.2	-151.409	-6387.59		61.2	-185.888	-1617.68
61.3	-2.19687	-1.73944	0.470886	-0.452515		61.3	1.48788	-2.4464	0.499432	1.18421		61.3	-34.2884	-596.267		61.3	-44.6054	-2652.65		61.3	-714.28	-1363.4		61.3	-11.1194	-380.171		61.3	-152.343	-6381.67		61.3	-185.888	-1608.34
61.4	-3.75378	1.06323	1.0937	0.793091		61.4	1.79913	-3.69185	-1.36848	5.23207		61.4	-28.3722	-587.237		61.4	-43.6713	-2654.21		61.4	-709.298	-1368.07		61.4	-8.0056	-381.105		61.4	-155.146	-6396.31		61.4	-187.757	-1607.72
61.5	-3.44239	-2.67308	-1.39726	1.10454		61.5	3.35588	-6.18283	-0.745357	1.49541		61.5	-24.6356	-598.758		61.5	-46.1623	-2658.26		61.5	-713.969	-1367.14		61.5	-9.5625	-380.171		61.5	-154.211	-6396		61.5	-188.068	-1612.7
61.6	4.6535	0.75235	1.40523	0.170502		61.6	0.553314	-4.93724	0.811913	1.18394		61.6	-26.8153	-600.315		61.6	-52.0786	-2653.9		61.6	-714.903	-1354.37		61.6	-8.93974	-377.369		61.6	-142.69	-6371.4		61.6	-186.511	-1608.65
61.7	-3.44239	0.129852	-0.774384	1.41609		61.7	0.864548	-4.62579	1.12366	1.18384		61.7	-24.0129	-604.986		61.7	-44.9168	-2655.45		61.7	-714.903	-1355.93		61.7	-9.5625	-379.86		61.7	-131.481	-6371.4		61.7	-180.906	-1606.47
61.8	-6.24482	-4.22923	-1.39708	-0.452103		61.8	2.73268	-2.75744	1.12403	1.80651		61.8	-26.5039	-596.89		61.8	-45.2282	-2650.78		61.8	-708.364	-1359.04		61.8	-10.4966	-385.776		61.8	-125.564	-6362.06		61.8	-187.757	-1610.83
61.9	-4.37654	-1.42654	-1.08563	0.482117		61.9	3.97806	-5.24842	0.190255	3.05194		61.9	-27.7494	-585.369		61.9	-45.8509	-2645.49		61.9	-710.544	-1375.24		61.9	-10.4966	-380.794		61.9	-121.205	-6358.94		61.9	-183.397	-1609.28
62	-2.19687	-4.54012	-0.7742	1.72772		62	3.97791	-3.38007	-0.43214	0.249426		62	-26.5039	-576.65		62	-44.6054	-2637.08		62	-711.167	-1355		62	-8.0056	-365.848		62	-119.96	-6356.76		62	-183.709	-1600.25
62.1	-3.44239	0.130859	-1.3969	0.793671		62.1	3.66638	-5.24828	1.43651	1.18348		62.1	-28.3722	-576.339		62.1	-46.1623	-2629.92		62.1	-709.61	-1357.18		62.1	-9.25112	-355.572		62.1	-115.289	-6372.33		62.1	-185.266	-1602.74
62.2	-6.24482	-2.67133	-1.08545	0.482361		62.2	3.04347	-5.5596	2.05964	1.49476		62.2	-24.3243	-575.405		62.2	-49.5875	-2629.3		62.2	-711.478	-1362.16		62.2	-8.0056	-347.476		62.2	-113.421	-6369.84		62.2	-184.02	-1611.77
62.3	-6.24482	-0.180023	-0.151245	-0.451706		62.3	0.552292	-1.51158	0.503104	3.05158		62.3	-26.5039	-573.848		62.3	-48.0306	-2635.84		62.3	-708.364	-1354.69		62.3	-8.31698	-349.033		62.3	-114.355	-6356.45		62.3	-183.086	-1608.03
62.4	-6.5562	-0.49115	-1.08533	1.41667		62.4	0.240753	-2.44566	-0.11929	4.29701		62.4	-27.7494	-573.225		62.4	-49.8989	-2655.77		62.4	-706.184	-1357.18		62.4	-6.13731	-346.854		62.4	-112.175	-6350.22		62.4	-179.972	-1601.8
62.5	-6.5562	-1.11366	-1.39665	-0.140152		62.5	-1.93906	-4.31387	-0.118923	1.18311		62.5	-25.2584	-574.47		62.5	-48.342	-2656.39		62.5	-701.202	-1382.09		62.5	-9.25112	-350.279		62.5	-105.325	-6372.33		62.5	-184.954	-1601.49
62.6	-6.24482	-0.802032	2.02859	1.72823		62.6	-2.25058	-1.51138	-0.118556	1.18302		62.6	-23.3901	-579.141		62.6	-46.4737	-2652.65		62.6	-704.316	-1371.5		62.6	-10.1853	-360.554		62.6	-101.588	-6387.59		62.6	-185.266	-1599
62.7	-6.86758	-0.179016	0.783142	-0.139984		62.7	-0.0710602	-1.82269	-1.67509	1.18292		62.7	-19.0308	-579.764		62.7	-50.2103	-2641.13		62.7	-715.214	-1365.27		62.7	-11.7422	-372.075		62.7	-99.4084	-6387.9		62.7	-187.445	-1590.28
62.8	-8.73587	-1.42429	-0.462326	0.171478		62.8	-0.69397	0.668421	0.19356	3.98526		62.8	-25.2584	-571.668		62.8	-52.3899	-2637.39		62.8	-705.873	-1368.07		62.8	-10.1853	-363.045		62.8	-95.6718	-6375.45		62.8	-182.775	-1587.79
62.9	-7.49034	-2.35817	0.160492	2.66261		62.9	-4.43068	-1.1998	0.505308	2.11688		62.9	-24.6356	-563.261		62.9	-52.0786	-2631.79		62.9	-696.532	-1359.98		62.9	-10.4966	-360.243		62.9	-89.4442	-6360.19		62.9	-184.332	-1589.35
63	-9.67001	-0.489639	-1.08496	4.53096		63	-4.43082	-0.576965	-1.05123	1.49403		63	-21.8332	-570.734		63	-56.4379	-2623.38		63	-694.975	-1349.08		63	-11.4308	-349.967		63	-94.1149	-6348.04		63	-181.84	-1585.3
63.1	-8.1131	2.00166	1.09476	0.794479		63.1	-2.25131	-5.55899	-0.4281	3.05084		63.1	-21.2104	-574.159		63.1	-50.833	-2615.91		63.1	-692.172	-1353.13		63.1	-8.93974	-341.249		63.1	-95.3605	-6350.54		63.1	-179.972	-1588.1
63.2	-12.1611	-1.73466	2.02898	0.171814		63.2	-2.87421	-3.37926	1.12917	2.73937		63.2	-24.0129	-574.47		63.2	-49.2761	-2620.58		63.2	-685.945	-1353.44		63.2	-11.1194	-351.836		63.2	-97.2287	-6357.39		63.2	-174.367	-1596.51
63.3	-9.67001	-0.488876	-0.462006	1.72879		63.3	-3.49712	-7.11576	0.195396	-1.30867		63.3	-20.8991	-584.746		63.3	-51.1444	-2621.2		63.3	-691.861	-1361.22		63.3	-10.808	-351.836		63.3	-92.2467	-6348.98		63.3	-177.481	-1588.72
63.4	-5.31068	-0.800018	1.40634	0.171967		63.4	-1.31761	-4.93603	2.37543	1.80504		63.4	-19.9649	-585.991		63.4	-53.3241	-2624.32		63.4	-687.19	-1373.99		63.4	-8.0056	-359.932		63.4	-73.8752	-6349.29		63.4	-179.038	-1592.77
63.5	-4.68792	-2.04529	-1.70741	1.72896		63.5	-1.62912	-5.55872	0.196131	-0.374714		63.5	-16.5397	-575.716		63.5	-53.0127	-2627.12		63.5	-688.124	-1366.21		63.5	-12.6763	-363.668		63.5	-58.9289	-6353.34		63.5	-174.679	-1589.66
63.6	-9.35863	1.69153	-0.150436	2.04041		63.6	-0.0723724	-2.75623	-0.114883	2.42762		63.6	-19.6535	-559.213		63.6	-54.2582	-2624.94		63.6	-693.106	-1366.21		63.6	-12.6763	-364.291		63.6	-58.3062	-6351.78		63.6	-176.236	-1580.63
63.7	-11.2269	-1.11064	-1.08452	2.35188		63.7	0.238861	-1.82202	0.196865	2.73891		63.7	-19.6535	-569.488		63.7	-53.0127	-2634.9		63.7	-697.466	-1371.81		63.7	-8.62836	-358.686		63.7	-67.3362	-6358.32		63.7	-175.924	-1586.86
63.8	-9.98139	1.38066	1.71797	4.53162		63.8	0.238708	-2.44471	1.75414	2.42744		63.8	-23.7015	-560.147		63.8	-55.8151	-2638.33		63.8	-691.549	-1377.73		63.8	-9.25112	-356.818		63.8	-81.6597	-6349.6		63.8	-172.81	-1588.41
63.9	-7.49034	0.135391	0.78389	2.35204		63.9	2.72963	-2.44465	2.37726	0.247679		63.9	-21.8332	-557.344		63.9	-58.9289	-2631.48		63.9	-690.304	-1379.6		63.9	-13.9218	-358.375		63.9	-86.019	-6320.96		63.9	-173.122	-1591.53
64	-7.80172	2.93806	1.71809	2.97488		64	3.97499	-0.887674	3.00039	-0.0637937		64	-20.8991	-565.752		64	-53.6355	-2625.56		64	-681.274	-1364.96		64	-12.3649	-353.704		64	-84.7735	-6313.48		64	-175.613	-1598.38
64.1	-7.49034	1.69278	1.40677	-0.450226		64.1	3.04071	-1.82175	-0.113047	0.870256		64.1	-22.456	-562.327		64.1	-53.6355	-2621.2		64.1	-682.831	-1352.82		64.1	-11.1194	-352.147		64.1	-78.2345	-6322.2		64.1	-178.415	-1605.54
64.2	-9.04725	1.69304	-1.08421	0.172623		64.2	3.04056	0.669363	1.13284	3.04983		64.2	-20.8991	-561.392		64.2	-50.833	-2619.33		64.2	-686.879	-1343.16		64.2	-13.9218	-356.195		64.2	-80.4142	-6334.34		64.2	-177.17	-1610.21
64.3	-5.93344	1.07053	2.6524	2.66376		64.3	1.79489	-1.19885	1.13321	1.49283		64.3	-24.0129	-569.177		64.3	-51.4558	-2625.25		64.3	-687.813	-1361.54		64.3	-7.38284	-354.015		64.3	-79.48	-6334.03		64.3	-177.481	-1607.1
64.4	-6.24482	-1.73164	2.02971	1.72969		64.4	2.10612	-2.75569	1.44496	0.86998		64.4	-20.2763	-576.339		64.4	-51.7672	-2622.14		64.4	-692.484	-1371.81		64.4	-12.3649	-360.866		64.4	-79.48	-6326.87		64.4	-174.056	-1595.26
64.5	-4.9993	0.136887	2.96391	1.10699		64.5	-2.87611	-2.75562	0.822564	2.73817		64.5	-18.408	-575.093		64.5	-50.833	-2624		64.5	-692.484	-1381.15		64.5	-10.4966	-372.387		64.5	-82.2825	-6337.46		64.5	-173.745	-1599
64.6	-1.26273	3.25095	-2.3295	2.04123		64.6	-1.31935	2.22654	2.69121	0.869796		64.6	-20.8991	-580.387		64.6	-53.6355	-2617.47		64.6	-694.352	-1380.22		64.6	-10.4966	-370.519		64.6	-81.0369	-6344		64.6	-177.17	-1597.44
64.7	2.16246	1.38292	1.40714	0.795792		64.7	-3.18779	0.358318	1.44606	0.246943		64.7	-21.5218	-584.435		64.7	-51.7672	-2619.02		64.7	-694.352	-1366.52		64.7	-9.25112	-364.914		64.7	-82.5938	-6329.36		64.7	-175.613	-1599.93
64.8	0.916935	-0.173737	-0.772461	1.73003		64.8	-2.56516	-0.264376	-0.733237	2.11514		64.8	-21.2104	-579.141		64.8	-52.7013	-2611.24		64.8	-685.01	-1369.94		64.8	-8.62836	-357.129		64.8	-86.9532	-6303.83		64.8	-173.122	-1597.44
64.9	2.16246	2.62894	-0.461014	1.41872		64.9	-7.23602	0.981216	3.0037	2.42642		64.9	-25.2584	-572.602		64.9	-49.5875	-2612.17		64.9	-686.879	-1359.67		64.9	-11.7422	-358.063		64.9	-87.2646	-6305.07		64.9	-172.81	-1592.77
65	-1.26273	-1.10738	2.65285	1.73018		65	-3.18822	-0.26424	1.44716	-0.064713		65	-25.5698	-576.027		65	-46.1623	-2605.94		65	-686.879	-1359.98		65	-11.7422	-355.572		65	-80.7256	-6289.51		65	-170.631	-1583.12
65.1	1.22831	1.6953	-0.772278	2.35303		65.1	-1.63145	-0.264174	4.24995	0.246575		65.1	-24.3243	-574.159		65.1	-45.2282	-2599.41		65.1	-687.19	-1345.66		65.1	-6.76008	-352.458		65.1	-78.8573	-6291.37		65.1	-172.188	-1585.61
65.2	-2.50825	1.69556	2.65297	2.66449		65.2	-3.49989	-0.264105	3.93894	1.49201		65.2	-19.9649	-571.045		65.2	-49.5875	-2605.63		65.2	-688.436	-1338.8		65.2	-8.93974	-349.656		65.2	-83.8394	-6311.61		65.2	-170.631	-1585.3
65.3	-2.81963	1.38443	0.161987	2.35318		65.3	-3.18866	-1.50956	3.62793	0.869153		65.3	-20.8991	-574.47		65.3	-48.342	-2599.41		65.3	-685.01	-1345.97		65.3	-8.0056	-337.824		65.3	-85.0849	-6313.17		65.3	-167.517	-1589.04
65.4	-2.50825	0.13916	-0.460709	1.10774		65.4	-3.81157	-0.263971	2.07139	1.49182		65.4	-20.8991	-571.045		65.4	-45.5396	-2606.88		65.4	-674.112	-1342.23		65.4	-11.7422	-347.165		65.4	-82.5938	-6301.96		65.4	-168.763	-1595.26
65.5	-9.35863	2.63045	2.0304	2.66473		65.5	0.236237	-0.263903	2.07176	0.246208		65.5	-22.1446	-558.279		65.5	-42.1144	-2612.17		65.5	-674.735	-1340.05		65.5	-3.95765	-345.919		65.5	-74.498	-6320.02		65.5	-166.583	-1591.22
65.6	-3.13101	0.762421	1.71909	2.66483		65.6	-1.00943	-2.13212	-1.04168	0.557496		65.6	-22.7674	-559.524		65.6	-39.3119	-2618.71		65.6	-671.932	-1337.87		65.6	-5.51455	-337.512		65.6	-69.8272	-6317.53		65.6	-163.469	-1578.14
65.7	-6.5562	4.18785	0.473618	-0.137527		65.7	-1.94371	-2.44343	0.20421	0.868785		65.7	-20.2763	-569.8		65.7	-40.8688	-2618.71		65.7	-677.849	-1338.18		65.7	-9.25112	-338.446		65.7	-57.6834	-6302.9		65.7	-165.96	-1583.12
65.8	-6.5562	2.31982	1.71921	1.73083		65.8	-1.00972	-6.17993	0.204577	1.18007		65.8	-18.7194	-582.566		65.8	-46.1623	-2610.3		65.8	-671.31	-1338.49		65.8	-8.0056	-347.165		65.8	-61.1086	-6325.63		65.8	-161.912	-1576.58
65.9	-4.68792	0.140411	1.40788	2.66507		65.9	0.547028	-4.31158	0.827705	-0.0655408		65.9	-19.6535	-583.812		65.9	-44.6054	-2620.27		65.9	-671.621	-1335.69		65.9	-4.89179	-351.213		65.9	-59.5517	-6316.6		65.9	-168.451	-1575.33
66	-1.57411	-1.72762	3.27623	1.731		66	1.16965	-1.50909	0.828073	-0.688394		66	-19.0308	-576.961		66	-40.8688	-2619.96		66	-673.801	-1338.49		66	-3.95765	-351.836		66	-66.7134	-6310.06		66	-165.96	-1573.47
66.1	-2.19687	-1.10461	1.09662	2.35384		66.1	0.858124	-2.75454	-0.105702	-1.62263		66.1	-18.0966	-578.83		66.1	-41.1802	-2616.84		66.1	-676.603	-1350.01		66.1	-2.08937	-344.674		66.1	-70.45	-6305.7		66.1	-165.337	-1571.91
66.2	-0.0172081	2.63222	0.162537	1.73117		66.2	0.5466	-1.19757	-1.35086	0.556944		66.2	-21.2104	-600.315		66.2	-33.7071	-2611.86		66.2	-665.082	-1345.97		66.2	-1.77799	-337.512		66.2	-65.4679	-6297.91		66.2	-164.715	-1577.83
66.3	-0.951347	2.32108	1.71951	-0.137039		66.3	2.10335	-2.44303	0.829174	0.556852		66.3	-21.8332	-611.836		66.3	-33.7071	-2607.81		66.3	-669.441	-1343.79		66.3	-3.95765	-333.153		66.3	-58.3062	-6279.23		66.3	-163.158	-1589.04
66.4	0.916935	2.00996	1.40819	1.73132		66.4	4.28288	-3.68848	6.12301	-1.93428		66.4	-19.0308	-606.543		66.4	-38.3778	-2604.08		66.4	-677.537	-1332.58		66.4	-8.93974	-336.578		66.4	-60.4858	-6258.99		66.4	-161.289	-1590.28
66.5	5.27626	-0.169464	0.785507	0.797272		66.5	2.72583	-0.263229	2.38681	-0.0660925		66.5	-24.3243	-607.165		66.5	-39.3119	-2601.27		66.5	-676.292	-1323.55		66.5	-1.15522	-341.249		66.5	-66.0907	-6257.12		66.5	-163.469	-1593.39
66.6	2.16246	2.63322	0.785568	2.97701		66.6	2.10292	-1.82007	2.38718	1.17934		66.6	-21.5218	-599.381		66.6	-35.8868	-2611.24		66.6	-673.178	-1331.02		66.6	-3.02351	-349.345		66.6	-61.7314	-6273		66.6	-166.583	-1591.53
66.7	-2.50825	2.01071	0.785629	1.4202		66.7	1.48001	0.359665	2.07617	-0.689038		66.7	-20.5877	-590.039		66.7	-34.9526	-2608.75		66.7	-670.687	-1340.05		66.7	-5.20317	-355.572		66.7	-61.42	-6263.66		66.7	-168.451	-1592.77
66.8	-3.44239	2.63373	1.40845	-0.448013		66.8	2.10262	-2.75407	4.2562	3.35882		66.8	-19.3422	-588.171		66.8	-37.4437	-2610.62		66.8	-666.95	-1336		66.8	-5.51455	-359.62		66.8	-60.4858	-6257.43		66.8	-174.367	-1594.33
66.9	-0.328587	1.38846	2.34265	0.486206		66.9	3.34801	-4.62229	1.76552	0.867682		66.9	-23.0787	-583.189		66.9	-34.9526	-2613.11		66.9	-662.591	-1351.26		66.9	-1.46661	-352.458		66.9	-54.5696	-6255.56		66.9	-172.188	-1599.31
67	-1.88549	2.01147	0.785812	1.73183		67	2.41371	-1.8198	2.38865	0.556209		67	-21.5218	-581.944		67	-35.264	-2609.99		67	-660.723	-1357.49		67	-0.843844	-357.752		67	-53.9468	-6253.07		67	-165.026	-1601.8
67.1	-5.31068	2.63448	1.09724	-0.447769		67.1	-0.700241	-5.24492	2.38902	-1.31217		67.1	-25.5698	-593.153		67.1	-36.5095	-2599.72		67.1	-657.298	-1349.39		67.1	1.95858	-367.093		67.1	-54.881	-6258.99		67.1	-159.732	-1597.75
67.2	-2.50825	2.94612	1.40869	1.73198		67.2	-2.88005	-6.17899	1.14386	-0.0667357		67.2	-24.0129	-602.183		67.2	-28.725	-2600.96		67.2	-660.1	-1351.57		67.2	1.6472	-366.159		67.2	-58.6175	-6274.87		67.2	-165.026	-1599
67.3	-5.62206	-0.478821	1.09737	1.42068		67.3	0.233612	-4.31064	0.832847	0.867314		67.3	-19.9649	-604.986		67.3	-29.0364	-2602.52		67.3	-666.016	-1361.54		67.3	-3.02351	-370.207		67.3	-58.6175	-6274.56		67.3	-164.403	-1588.72
67.4	-4.9993	1.7011	2.03157	1.10938		67.4	-1.32344	-3.06505	-0.723689	0.555841		67.4	-21.2104	-604.674		67.4	-28.725	-2604.39		67.4	-667.573	-1355.93		67.4	-6.13731	-366.159		67.4	-58.3062	-6271.76		67.4	-167.206	-1583.12
67.5	-1.26273	-0.166946	0.474731	0.798096		67.5	2.41299	-3.99912	-1.65746	0.555749		67.5	-25.8812	-597.824		67.5	-31.216	-2607.19		67.5	-667.885	-1361.22		67.5	-2.71213	-349.033		67.5	-64.8452	-6264.6		67.5	-170.008	-1589.04
67.6	0.605553	2.32436	1.72032	0.486786		67.6	2.72423	-3.3763	1.14533	-0.689866		67.6	-28.3722	-592.53		67.6	-31.5274	-2596.6		67.6	-660.723	-1352.82		67.6	-1.77799	-337.512		67.6	-77.3004	-6257.74		67.6	-167.828	-1586.23
67.7	-1.57411	1.07909	0.474854	0.175491		67.7	3.6582	-3.68761	3.32536	-0.378576		67.7	-22.7674	-602.495		67.7	-29.6591	-2599.41		67.7	-673.178	-1340.05		67.7	-3.64627	-336.578		67.7	-77.3004	-6234.08		67.7	-169.385	-1591.53
67.8	-3.75378	2.01349	2.3432	1.10971		67.8	1.47841	-3.06478	1.14606	0.555473		67.8	-24.0129	-600.626		67.8	-31.8388	-2608.44		67.8	-676.603	-1336.31		67.8	-6.4487	-341.871		67.8	-69.8272	-6211.04		67.8	-178.104	-1589.35
67.9	-3.44239	2.3251	-3.2616	0.175659		67.9	1.78964	-3.99886	0.83505	0.244001		67.9	-22.7674	-588.794		67.9	-32.773	-2609.06		67.9	-665.394	-1335.07		67.9	-6.13731	-348.41		67.9	-71.6955	-6217.58		67.9	-172.499	-1588.72
68	0.294174	-0.788437	1.72057	3.28954		68	-1.01292	-4.93293	1.45818	-1.00161		68	-22.1446	-577.896		68	-34.6412	-2610.62		68	-662.902	-1335.69		68	-3.02351	-352.77		68	-79.1687	-6215.09		68	-166.583	-1584.68
68.1	2.16246	1.08009	2.03201	0.487198		68.1	-3.50412	-1.50767	0.835784	-1.62447		68.1	-26.5039	-578.518		68.1	-50.5216	-2608.12		68.1	-665.082	-1339.12		68.1	-6.13731	-349.033		68.1	-75.7435	-6205.43		68.1	-166.583	-1584.68
68.2	2.16246	1.08035	1.7207	1.11003		68.2	0.855072	-5.55556	2.08167	-3.18146		68.2	-28.6836	-581.321		68.2	-57.0606	-2609.99		68.2	-665.705	-1342.85		68.2	-3.64627	-359.62		68.2	-73.5638	-6208.24		68.2	-168.763	-1579.69
68.3	0.605553	1.70335	1.40938	1.11011		68.3	-1.32475	-5.24411	1.1479	1.80054		68.3	-31.486	-591.285		68.3	-62.9769	-2608.12		68.3	-666.328	-1339.74		68.3	-5.82593	-351.524		68.3	-76.989	-6224.74		68.3	-172.188	-1587.48
68.4	-0.328587	2.015	1.72083	1.42159		68.4	-2.25903	-5.24404	1.77103	1.80044		68.4	-26.5039	-592.842		68.4	-64.8452	-2594.42		68.4	-666.328	-1355.93		68.4	-4.26903	-343.428		68.4	-73.5638	-6229.1		68.4	-167.206	-1596.2
68.5	-3.13101	0.458344	2.65501	2.3558		68.5	-7.86403	-2.44155	1.14863	0.243449		68.5	-26.5039	-594.71		68.5	-68.2703	-2596.6		68.5	-662.591	-1367.76		68.5	-0.843844	-334.398		68.5	-68.8931	-6240.62		68.5	-167.517	-1590.59
68.6	-1.26273	2.94965	-0.458725	0.48761		68.6	-7.86418	-5.24391	3.64005	0.554738		68.6	-31.7974	-597.513		68.6	-70.45	-2595.67		68.6	-657.298	-1360.91		68.6	3.51548	-335.333		68.6	-74.498	-6227.54		68.6	-163.158	-1581.25
68.7	-0.328587	2.01575	-0.147278	1.42183		68.7	-3.50499	-4.62108	2.08351	0.243265		68.7	-29.6177	-585.68		68.7	-66.4021	-2590.38		68.7	-658.543	-1336.94		68.7	-0.532464	-346.542		68.7	-72.0069	-6231.9		68.7	-165.026	-1577.83
68.8	-2.19687	2.63876	0.47554	-0.757751		68.8	-4.43929	-3.68687	-0.0957866	-0.379588		68.8	-28.6836	-596.267		68.8	-59.5517	-2582.28		68.8	-656.363	-1330.09		68.8	-2.71213	-347.788		68.8	-72.3183	-6230.97		68.8	-164.092	-1579.69
68.9	1.22831	2.32762	-1.0813	-1.6918		68.9	-3.50528	-7.42337	-1.65232	3.35689		68.9	-28.3722	-595.333		68.9	-62.9769	-2583.21		68.9	-659.477	-1339.12		68.9	-4.58041	-343.428		68.9	-67.6476	-6236.57		68.9	-164.715	-1584.05
69	-5.93344	2.01651	1.09842	1.11069		69	-3.81682	-3.68673	-1.65196	4.60232		69	-26.5039	-587.548		69	-58.9289	-2587.57		69	-663.837	-1337.25		69	-4.58041	-339.38		69	-62.0427	-6242.49		69	-162.846	-1576.89
69.1	0.294174	0.148468	0.164337	1.11076		69.1	-1.01453	-2.12976	2.70774	-0.691245		69.1	-29.3063	-585.369		69.1	-56.1265	-2575.43		69.1	-662.591	-1352.51		69.1	-4.26903	-340.315		69.1	-61.42	-6244.67		69.1	-165.649	-1566.3
69.2	-1.57411	2.01701	-2.01526	0.799484		69.2	2.09912	-1.50693	0.528444	0.242805		69.2	-29.9291	-590.662		69.2	-53.3241	-2578.23		69.2	-661.968	-1354.69		69.2	-2.40075	-342.494		69.2	-62.3541	-6254.94		69.2	-164.715	-1567.86
69.3	-3.13101	1.3945	1.72137	1.7337		69.3	-0.703461	-4.30929	-0.0939503	0.554094		69.3	-29.3063	-593.465		69.3	-53.0127	-2586.95		69.3	-662.902	-1336.63		69.3	-3.64627	-344.985		69.3	-72.3183	-6265.53		69.3	-161.289	-1566.3
69.4	2.16246	2.01752	1.41005	-0.134491		69.4	-3.8174	-3.99784	1.46332	-0.068759		69.4	-32.7315	-591.908		69.4	-47.4078	-2590.06		69.4	-654.184	-1329.77		69.4	-3.33489	-345.919		69.4	-76.3662	-6255.88		69.4	-160.044	-1561.01
69.5	4.03074	0.772232	0.787354	0.176971		69.5	-2.88341	-5.86606	2.08645	-1.00299		69.5	-30.2405	-591.285		69.5	-43.9827	-2586.33		69.5	-656.986	-1333.2		69.5	-1.46661	-355.884		69.5	-79.7914	-6229.72		69.5	-164.403	-1563.81
69.6	4.96488	1.70663	0.787415	0.488419		69.6	1.47578	-5.24323	1.46406	-0.380323		69.6	-28.0608	-583.812		69.6	-37.4437	-2590.69		69.6	-663.525	-1344.41		69.6	-3.64627	-354.949		69.6	-73.2524	-6232.83		69.6	-163.469	-1572.22
69.7	7.45593	1.39551	-0.146667	1.11127		69.7	-1.01541	-2.75212	0.53028	-0.0690351		69.7	-28.3722	-590.662		69.7	-31.5274	-2583.21		69.7	-658.855	-1341.92		69.7	-5.82593	-344.363		69.7	-76.3662	-6244.36		69.7	-157.241	-1571.91
69.8	1.85108	1.70714	-1.70351	-0.134171		69.8	-2.26108	-5.86586	-1.02626	-0.0691266		69.8	-29.3063	-596.578		69.8	-34.0185	-2585.08		69.8	-647.956	-1338.8		69.8	-1.15522	-336.578		69.8	-85.7077	-6238.13		69.8	-162.224	-1580.32
69.9	3.71936	3.26428	-0.769302	2.04556		69.9	-1.32709	-5.24303	1.15378	0.864923		69.9	-30.5519	-592.53		69.9	-33.7071	-2586.02		69.9	-647.645	-1348.15		69.9	-4.26903	-333.776		69.9	-80.1028	-6225.36		69.9	-159.732	-1582.5
70	4.6535	2.3304	-0.457855	0.488754		70	-1.32722	-2.12915	1.15414	1.48759		70	-28.3722	-587.548		70	-33.7071	-2575.12		70	-649.825	-1344.41		70	-1.77799	-334.087		70	-86.3304	-6235.33		70	-161.601	-1581.87
70.1	2.47384	0.773743	-0.146408	-0.756683		70.1	-4.12981	-3.68599	2.71141	-0.0694027		70.1	-26.5039	-582.255		70.1	-32.1502	-2572.32		70.1	-660.723	-1328.84		70.1	-1.46661	-340.003		70.1	-84.7735	-6240		70.1	-159.11	-1585.61
70.2	4.34212	1.70813	-0.146347	0.800293		70.2	-5.06409	-2.4404	1.46626	1.79879		70.2	-31.486	-585.369		70.2	-27.1681	-2567.02		70.2	-656.675	-1323.55		70.2	-2.40075	-351.213		70.2	-80.1028	-6249.03		70.2	-160.667	-1586.54
70.3	2.78522	2.64253	0.165085	-2.31343		70.3	-2.26181	-2.12895	2.40077	0.241794		70.3	-26.8153	-579.141		70.3	-26.234	-2572.63		70.3	-649.202	-1328.22		70.3	-1.15522	-356.195		70.3	-73.8752	-6221.31		70.3	-158.176	-1588.1
70.4	-0.0172081	3.26553	1.09929	-0.756439		70.4	3.3429	-1.81751	1.15561	0.241702		70.4	-27.7494	-580.698		70.4	-29.9705	-2576.05		70.4	-647.022	-1339.43		70.4	-3.33489	-356.506		70.4	-71.0728	-6198.27		70.4	-152.259	-1586.54
70.5	-0.639969	4.19994	1.09935	-0.133591		70.5	0.540329	-0.260536	-1.64645	-1.62667		70.5	-27.7494	-583.812		70.5	-26.234	-2576.36		70.5	-648.268	-1338.49		70.5	-3.33489	-357.441		70.5	-73.8752	-6201.7		70.5	-155.373	-1587.48
70.6	1.22831	1.39777	0.476654	1.112		70.6	0.540176	-0.883228	-0.0891762	-1.62677		70.6	-28.3722	-578.207		70.6	-32.1502	-2576.36		70.6	-640.172	-1343.79		70.6	-3.02351	-353.704		70.6	-74.1866	-6204.19		70.6	-158.176	-1592.77
70.7	1.85108	0.463882	2.65637	1.11208		70.7	2.09694	-2.44007	0.533952	-5.36342		70.7	-28.995	-575.716		70.7	-27.1681	-2582.59		70.7	-642.663	-1355.62		70.7	-4.26903	-348.099		70.7	-69.5159	-6204.19		70.7	-152.259	-1590.28
70.8	-1.88549	3.26654	-0.457367	0.17804		70.8	4.27646	-3.06276	0.222939	-1.93833		70.8	-25.8812	-577.584		70.8	-27.4795	-2579.48		70.8	-643.286	-1355.31		70.8	-4.26903	-349.967		70.8	-64.2224	-6206.37		70.8	-155.685	-1581.87
70.9	0.916935	1.7099	-1.70284	-2.00156		70.9	2.09665	-2.12855	1.15745	-0.6929		70.9	-26.8153	-579.452		70.9	-33.3957	-2572.94		70.9	-645.777	-1363.09		70.9	-0.221083	-341.871		70.9	-69.5159	-6221.31		70.9	-158.798	-1577.51
71	-1.57411	2.02153	1.41104	1.42371		71	5.21031	-1.19434	1.15782	-0.07023		71	-30.2405	-576.961		71	-35.8868	-2562.97		71	-640.172	-1351.26		71	-2.71213	-335.644		71	-64.2224	-6240.62		71	-155.996	-1575.65
71.1	0.294174	2.02179	-0.457184	-2.31277		71.1	2.40773	0.985392	0.535421	1.1752		71.1	-29.6177	-574.782		71.1	-28.1022	-2563.91		71.1	-631.764	-1352.19		71.1	-4.89179	-329.105		71.1	-61.7314	-6231.59		71.1	-154.128	-1572.53
71.2	0.916935	-0.780396	-0.145737	-1.37856		71.2	2.71898	-0.571442	-1.02111	0.552347		71.2	-28.995	-579.141		71.2	-26.8567	-2555.81		71.2	-637.058	-1354.37		71.2	-4.89179	-335.644		71.2	-59.8631	-6233.77		71.2	-155.373	-1572.53
71.3	0.916935	-0.780136	1.72261	1.42397		71.3	0.85054	-1.19414	1.15892	-0.693268		71.3	-27.7494	-582.566		71.3	-27.4795	-2554.57		71.3	-640.483	-1350.01		71.3	-2.40075	-328.171		71.3	-59.8631	-6221.31		71.3	-153.816	-1574.4
71.4	-0.0172081	2.64529	-0.145615	0.178528		71.4	3.34145	-1.50545	0.536523	-1.00474		71.4	-29.6177	-583.5		71.4	-30.5933	-2554.57		71.4	-639.549	-1335.38		71.4	0.0902977	-329.728		71.4	-56.4379	-6234.7		71.4	-155.373	-1561.01
71.5	-1.57411	1.08865	-0.768311	0.178604		71.5	4.58681	-3.06229	-0.708632	-0.693452		71.5	-26.8153	-583.189		71.5	-28.1022	-2547.09		71.5	-634.878	-1346.28		71.5	-3.33489	-333.153		71.5	-57.0606	-6235.01		71.5	-154.75	-1557.59
71.6	-0.0172081	2.6458	0.788666	-2.31236		71.6	4.2753	-1.8167	-0.0855036	1.48612		71.6	-26.5039	-582.566		71.6	-29.0364	-2539.31		71.6	-636.435	-1357.18		71.6	-5.20317	-328.794		71.6	-58.3062	-6212.28		71.6	-152.882	-1556.34
71.7	2.47384	-0.779129	-0.456802	-0.132614		71.7	2.71825	-1.19387	-0.0851364	3.04293		71.7	-24.947	-585.369		71.7	-31.8388	-2542.11		71.7	-628.339	-1353.44		71.7	-0.843844	-322.255		71.7	-56.7493	-6193.29		71.7	-156.619	-1554.78
71.8	0.294174	1.71216	-0.456741	-1.68944		71.8	5.20915	-0.88242	1.16075	-1.31649		71.8	-26.1925	-592.219		71.8	-27.4795	-2545.54		71.8	-628.339	-1350.95		71.8	-0.532464	-323.811		71.8	-57.9948	-6182.7		71.8	-160.667	-1555.41
71.9	4.03074	2.95795	0.788849	1.11307		71.9	4.27486	-2.75064	-1.01854	0.863084		71.9	-28.0608	-583.189		71.9	-26.5453	-2556.12		71.9	-631.453	-1346.59		71.9	-4.58041	-335.955		71.9	-60.7972	-6185.5		71.9	-157.553	-1555.09
72	2.47384	-0.466995	-0.145233	-0.755127		72	7.69989	-1.19367	-1.01818	-0.693912		72	-25.2584	-576.961		72	-28.4136	-2566.4		72	-631.453	-1345.34		72	-1.46661	-337.824		72	-58.3062	-6182.08		72	-154.75	-1555.72
72.1	2.78522	0.778778	1.10034	0.801849		72.1	4.27457	-1.81636	-1.01781	1.79704		72.1	-25.5698	-559.836		72.1	-28.1022	-2562.66		72.1	-627.094	-1343.16		72.1	-0.221083	-329.728		72.1	-57.0606	-6173.98		72.1	-150.08	-1556.34
72.2	7.14455	1.40179	0.16626	-0.754959		72.2	7.6996	-1.19353	-1.32882	0.862808		72.2	-25.5698	-558.901		72.2	-26.5453	-2557.68		72.2	-625.225	-1344.41		72.2	-2.40075	-325.368		72.2	-55.5037	-6171.49		72.2	-155.996	-1552.92
72.3	3.0966	0.467911	-0.14505	-0.754883		72.3	7.07671	-1.81623	-1.01707	-1.62833		72.3	-27.1267	-568.243		72.3	-25.6112	-2553.94		72.3	-627.405	-1352.82		72.3	-4.89179	-327.237		72.3	-53.6355	-6163.08		72.3	-160.044	-1555.09
72.4	4.03074	-0.154617	-0.767761	-0.44342		72.4	3.96274	-2.12754	-3.50775	0.239863		72.4	-24.947	-584.746		72.4	-21.2519	-2539.93		72.4	-628.651	-1352.19		72.4	-4.89179	-328.171		72.4	-52.3899	-6169.62		72.4	-157.864	-1554.16
72.5	2.78522	-0.154358	-1.07907	-2.00024		72.5	3.33984	-0.259188	-1.01634	1.48529		72.5	-25.8812	-575.716		72.5	-25.6112	-2536.2		72.5	-631.142	-1334.76		72.5	-4.89179	-328.171		72.5	-52.7013	-6173.36		72.5	-157.241	-1547.93
72.6	1.22831	1.09142	-2.32454	-0.131882		72.6	4.89659	-2.1274	0.54093	0.86244		72.6	-25.8812	-564.506		72.6	-30.2819	-2538.69		72.6	-624.603	-1326.35		72.6	-0.843844	-326.614		72.6	-54.881	-6155.92		72.6	-153.816	-1546.06
72.7	-0.951347	1.40306	-0.456192	-0.754547		72.7	1.78264	-1.1932	1.16406	0.239587		72.7	-27.7494	-566.686		72.7	-27.1681	-2536.2		72.7	-620.555	-1323.24		72.7	-0.221083	-335.955		72.7	-50.5216	-6146.89		72.7	-154.75	-1543.57
72.8	0.916935	2.02606	-2.01303	-0.131714		72.8	5.51906	-4.61831	-0.703858	-0.694647		72.8	-23.0787	-567.62		72.8	-24.9884	-2534.64		72.8	-621.8	-1317.32		72.8	-3.64627	-328.482		72.8	-48.6534	-6152.5		72.8	-152.259	-1553.54
72.9	2.78522	1.09218	-2.63573	-0.443024		72.9	3.33925	-2.74996	-1.63763	0.550784		72.9	-19.3422	-573.225		72.9	-28.1022	-2520		72.9	-621.489	-1304.55		72.9	-5.82593	-316.961		72.9	-49.8989	-6155.61		72.9	-154.439	-1563.5
73	-0.0172081	1.71518	0.78952	-1.37708		73	3.65048	-0.258852	-0.0803623	-0.0720692		73	-23.7015	-583.5		73	-30.9047	-2515.02		73	-628.028	-1306.42		73	-4.89179	-329.105		73	-47.7192	-6138.8		73	-155.373	-1572.22
73.1	3.71936	2.64958	-2.01283	-2.62251		73.1	3.65033	-0.881544	1.78829	-2.25183		73.1	-19.9649	-589.417		73.1	-31.5274	-2533.08		73.1	-633.01	-1324.17		73.1	-7.07146	-331.596		73.1	-52.3899	-6127.9		73.1	-147.9	-1560.39
73.2	5.89902	2.02707	-1.39001	-0.131393		73.2	0.225006	-0.570095	-1.94791	0.550508		73.2	-24.3243	-585.68		73.2	-34.0185	-2534.02		73.2	-628.339	-1322.3		73.2	-6.76008	-326.614		73.2	-50.5216	-6138.17		73.2	-152.571	-1548.87
73.3	1.85108	-0.152344	-1.38995	-2.31097		73.3	3.65004	-3.06108	-2.25892	2.4187		73.3	-23.3901	-576.65		73.3	-29.9705	-2527.79		73.3	-619.621	-1333.82		73.3	-9.5625	-326.614		73.3	-46.7851	-6124.47		73.3	-153.816	-1549.49
73.4	-4.06516	0.470673	-1.70128	-1.37675		73.4	3.33853	-2.43825	-3.1927	-1.00658		73.4	-21.2104	-568.243		73.4	-29.9705	-2535.26		73.4	-615.573	-1332.27		73.4	-4.26903	-317.272		73.4	-56.7493	-6147.83		73.4	-155.685	-1547.31
73.5	-2.81963	1.40508	-0.767075	-0.753891		73.5	8.00908	-2.43818	-1.63543	-2.87495		73.5	-21.5218	-564.195		73.5	-26.8567	-2534.33		73.5	-615.573	-1333.51		73.5	-7.07146	-321.009		73.5	-54.5696	-6147.52		73.5	-151.325	-1549.8
73.6	-2.81963	-1.39711	-0.144241	-1.99934		73.6	3.02684	-2.74949	-2.25782	-0.384001		73.6	-23.0787	-575.716		73.6	-26.234	-2534.02		73.6	-614.95	-1337.56		73.6	-7.69422	-328.171		73.6	-55.5037	-6151.25		73.6	-151.948	-1548.24
73.7	-0.328587	0.471436	-0.455566	-0.130981		73.7	0.224274	-2.12666	-1.01193	-0.695475		73.7	-24.3243	-584.435		73.7	-29.3478	-2538.37		73.7	-622.423	-1326.04		73.7	-9.25112	-331.285		73.7	-54.881	-6156.23		73.7	-149.768	-1543.89
73.8	1.85108	2.65134	-1.07826	-0.442276		73.8	2.09241	-2.43798	-2.87985	-1.94109		73.8	-20.8991	-581.944		73.8	-30.9047	-2544.6		73.8	-621.8	-1330.09		73.8	-12.9877	-337.824		73.8	-59.5517	-6131.01		73.8	-151.014	-1547
73.9	4.03074	2.6516	-0.144058	-1.06496		73.9	3.64917	-2.43791	0.545704	-0.072897		73.9	-22.456	-581.632		73.9	-29.6591	-2550.21		73.9	-616.818	-1337.25		73.9	-8.93974	-329.105		73.9	-63.2883	-6128.21		73.9	-156.93	-1538.59
74	4.6535	-0.150589	-2.63504	-0.130737		74	4.58316	-3.68336	-0.699451	0.238391		74	-24.6356	-581.009		74	-26.8567	-2551.76		74	-614.327	-1336.94		74	-5.82593	-334.087		74	-56.4379	-6107.66		74	-151.325	-1540.15
74.1	1.5397	-1.39584	-2.32361	-1.37617		74.1	2.71475	-1.19225	-0.699084	-0.695843		74.1	-25.5698	-578.518		74.1	-29.3478	-2543.05		74.1	-618.064	-1326.97		74.1	-6.76008	-331.285		74.1	-51.7672	-6093.65		74.1	-150.702	-1538.9
74.2	2.78522	-0.461456	-2.32355	1.42633		74.2	3.33736	-1.81495	-3.50114	-1.3187		74.2	-22.456	-569.177		74.2	-29.0364	-2544.6		74.2	-622.112	-1333.82		74.2	-4.26903	-328.482		74.2	-49.5875	-6089.91		74.2	-153.505	-1536.41
74.3	-2.19687	2.6526	-0.143814	0.180908		74.3	3.95998	-3.0604	-1.32111	-0.384645		74.3	-24.0129	-570.422		74.3	-32.4616	-2550.83		74.3	-621.177	-1324.48		74.3	-7.07146	-321.632		74.3	-53.9468	-6080.57		74.3	-150.08	-1529.87
74.4	0.294174	0.161804	-1.70067	-1.99869		74.4	2.09154	-3.68309	-1.9435	-1.31888		74.4	-24.0129	-580.698		74.4	-42.7371	-2551.45		74.4	-625.537	-1321.99		74.4	-8.62836	-312.29		74.4	-59.5517	-6078.08		74.4	-150.391	-1533.61
74.5	0.294174	2.34172	-0.766464	-1.68723		74.5	2.71416	-2.12612	-3.18866	2.4176		74.5	-23.7015	-585.369		74.5	-39.6233	-2538.06		74.5	-613.082	-1325.42		74.5	-7.07146	-311.356		74.5	-63.911	-6082.44		74.5	-153.193	-1536.41
74.6	-1.57411	-0.460449	-2.94606	-0.130234		74.6	0.534348	-0.569151	-0.697248	2.10612		74.6	-21.2104	-595.333		74.6	-34.3299	-2534.02		74.6	-612.147	-1323.55		74.6	-4.26903	-307.308		74.6	-63.5996	-6079.32		74.6	-153.816	-1541.08
74.7	-3.75378	0.785324	-3.25739	-2.6212		74.7	-0.399948	-5.2398	-0.0741191	0.860509		74.7	-20.2763	-591.596		74.7	-36.8209	-2542.11		74.7	-614.016	-1317.63		74.7	-8.0056	-307.62		74.7	-57.9948	-6065.93		74.7	-153.193	-1544.2
74.8	1.85108	0.474197	-2.63454	-0.441467		74.8	-0.711472	-5.23973	-1.94204	0.860417		74.8	-20.2763	-593.153		74.8	-35.8868	-2539.62		74.8	-618.686	-1326.04		74.8	-9.25112	-313.847		74.8	-59.8631	-6066.56		74.8	-152.259	-1536.41
74.9	5.58764	-0.771072	-0.766205	-0.441376		74.9	0.533905	-3.68276	-2.56443	-0.0738163		74.9	-24.3243	-590.351		74.9	-39.6233	-2532.15		74.9	-606.543	-1329.77		74.9	-12.6763	-316.65		74.9	-59.8631	-6060.64		74.9	-149.768	-1529.25
75	3.0966	0.474701	-1.70029	-3.24373		75	-1.02313	-5.55098	-3.4982	2.72852		75	-27.4381	-590.039		75	-37.1323	-2533.39		75	-605.297	-1340.05		75	-7.07146	-321.32		75	-58.6175	-6045.38		75	-148.211	-1530.18
75.1	3.0966	-0.147812	-0.454697	0.181549		75.1	-0.0891418	-2.12572	-3.80922	2.41704		75.1	-26.5039	-584.435		75.1	-39.3119	-2532.15		75.1	-606.543	-1338.18		75.1	-8.31698	-330.662		75.1	-56.4379	-6049.12		75.1	-150.702	-1533.61
75.2	1.5397	-0.147568	-0.14325	-0.441132		75.2	6.13834	-2.12565	-5.67713	2.41695		75.2	-24.0129	-571.357		75.2	-37.4437	-2537.13		75.2	-608.411	-1321.06		75.2	-8.93974	-327.548		75.2	-50.833	-6037.91		75.2	-146.032	-1536.1
75.3	2.16246	-1.08145	1.7251	-0.752426		75.3	4.89265	-3.05973	-3.4971	2.10548		75.3	-22.7674	-563.261		75.3	-35.264	-2554.26		75.3	-605.608	-1321.37		75.3	-7.07146	-326.302		75.3	-51.4558	-6048.81		75.3	-151.014	-1531.12
75.4	-0.0172081	-1.70396	0.47963	-2.30925		75.4	3.02422	-1.50276	-2.56259	0.237104		75.4	-24.947	-555.788		75.4	-32.773	-2556.43		75.4	-609.345	-1315.76		75.4	-3.95765	-322.255		75.4	-56.7493	-6053.17		75.4	-150.702	-1531.74
75.5	5.27626	-0.146805	-1.69998	-0.440887		75.5	3.02408	-1.50269	-3.49637	-0.69713		75.5	-25.2584	-552.051		75.5	-37.4437	-2558.3		75.5	-617.752	-1308.6		75.5	-8.62836	-316.961		75.5	-57.9948	-6051.3		75.5	-148.834	-1533.3
75.6	4.34212	-2.01485	0.479752	-1.99771		75.6	-1.64677	-2.74814	3.66575	2.41658		75.6	-24.6356	-543.332		75.6	-37.1323	-2571.69		75.6	-614.016	-1305.18		75.6	-7.69422	-321.632		75.6	-55.1924	-6039.78		75.6	-146.032	-1536.1
75.7	3.40798	-0.769058	-2.32262	-0.44072		75.7	-0.401398	-2.4367	-0.0704465	1.17097		75.7	-23.3901	-546.758		75.7	-36.5095	-2565.47		75.7	-604.363	-1311.09		75.7	-3.33489	-330.039		75.7	-53.0127	-6055.35		75.7	-147.277	-1533.92
75.8	1.22831	0.165329	-2.32256	-1.68616		75.8	2.08949	-4.92767	-2.87251	1.48226		75.8	-28.3722	-557.656		75.8	-37.4437	-2562.66		75.8	-604.363	-1312.96		75.8	-5.20317	-330.662		75.8	-55.5037	-6071.85		75.8	-150.08	-1528.63
75.9	-3.13101	0.165588	-2.94525	-2.62022		75.9	-1.02444	-4.9276	-2.24938	1.17079		75.9	-26.1925	-568.554		75.9	-35.8868	-2554.57		75.9	-604.986	-1313.58		75.9	-6.76008	-328.794		75.9	-54.2582	-6055.35		75.9	-152.571	-1530.18
76	2.16246	-1.0797	0.16861	-2.62013		76	-4.76117	-3.37064	-1.00349	1.79346		76	-23.7015	-569.177		76	-33.3957	-2550.52		76	-609.656	-1317.32		76	-7.07146	-324.123		76	-55.8151	-6052.54		76	-149.768	-1525.2
76.1	1.85108	-0.456665	-0.454086	0.182373		76.1	-2.58165	-6.79576	1.79931	4.59579		76.1	-24.6356	-564.506		76.1	-35.264	-2556.12		76.1	-603.117	-1331.95		76.1	-10.808	-325.68		76.1	-55.1924	-6046.63		76.1	-153.193	-1531.12
76.2	-0.0172081	2.34599	-1.69955	0.182465		76.2	-2.58179	-3.99326	1.48829	1.48189		76.2	-25.2584	-573.848		76.2	-36.1981	-2561.11		76.2	-609.968	-1331.33		76.2	-7.69422	-321.943		76.2	-49.5875	-6048.19		76.2	-148.834	-1535.48
76.3	-3.13101	0.789352	-0.142578	-1.68575		76.3	-6.00713	-2.12491	-2.55929	0.859038		76.3	-23.3901	-575.093		76.3	-37.1323	-2565.78		76.3	-613.082	-1333.2		76.3	-12.9877	-317.272		76.3	-45.5396	-6055.04		76.3	-140.738	-1541.08
76.4	-4.68792	-1.39006	-1.07664	-2.61981		76.4	-2.58208	-0.879322	-2.55892	0.547565		76.4	-26.5039	-565.752		76.4	-36.8209	-2566.09		76.4	-608.099	-1343.48		76.4	-15.4787	-311.979		76.4	-48.0306	-6058.77		76.4	-141.05	-1538.9
76.5	2.16246	-1.07845	-3.25626	-2.30835		76.5	2.39986	-1.50201	-2.55855	1.17023		76.5	-24.6356	-573.536		76.5	-31.5274	-2554.57		76.5	-595.021	-1318.88		76.5	-12.9877	-314.159		76.5	-52.0786	-6055.35		76.5	-140.738	-1531.12
76.6	1.5397	-2.63509	-1.38791	-3.55379		76.6	2.08833	-0.567804	-1.62404	-0.0753798		76.6	-22.7674	-572.914		76.6	-30.5933	-2553.63		76.6	-594.399	-1307.67		76.6	-8.93974	-311.668		76.6	-51.1444	-6051.3		76.6	-146.032	-1528.63
76.7	2.16246	-1.7007	1.1032	-1.99681		76.7	4.57922	-5.54983	-1.93506	0.235909		76.7	-24.947	-569.488		76.7	-31.5274	-2557.99		76.7	-594.399	-1320.43		76.7	-12.3649	-316.338		76.7	-51.4558	-6063.75		76.7	-146.343	-1526.76
76.8	-1.57411	1.10199	-1.0764	-0.439819		76.8	3.02219	-1.50181	-0.0664072	0.235817		76.8	-24.947	-571.979		76.8	-34.9526	-2564.22		76.8	-595.644	-1331.33		76.8	-13.9218	-317.272		76.8	-46.1623	-6074.34		76.8	-141.05	-1526.76
76.9	-2.81963	-2.63434	-0.453583	-0.751114		76.9	5.51308	-3.68141	-3.17985	2.10401		76.9	-25.5698	-573.536		76.9	-33.3957	-2560.17		76.9	-602.806	-1335.07		76.9	-10.808	-312.913		76.9	-40.8688	-6061.58		76.9	-150.08	-1535.17
77	-2.50825	-2.32269	-1.38766	-2.61932		77	6.75845	-5.23825	-4.425	3.34944		77	-29.3063	-580.387		77	-34.0185	-2552.39		77	-599.692	-1329.46		77	-16.1015	-323.5		77	-40.2461	-6061.26		77	-145.409	-1532.68
77.1	-2.81963	-3.25659	-2.63312	-1.68509		77.1	5.20142	-4.9268	-3.49049	1.48106		77.1	-28.6836	-572.602		77.1	-34.0185	-2546.47		77.1	-601.56	-1314.83		77.1	-13.2991	-339.069		77.1	-49.2761	-6069.98		77.1	-148.834	-1539.84
77.2	-3.44239	-2.63358	-1.38754	-1.37364		77.2	4.88988	-1.50154	-1.93322	0.85821		77.2	-25.2584	-576.339		77.2	-34.6412	-2549.9		77.2	-600.938	-1309.22		77.2	-12.0535	-338.446		77.2	-48.342	-6054.41		77.2	-149.146	-1546.38
77.3	-4.68792	-3.56747	-2.01024	1.42888		77.3	8.31493	-3.36976	-0.998713	1.48088		77.3	-25.5698	-572.291		77.3	-32.4616	-2547.72		77.3	-607.165	-1306.11		77.3	-12.9877	-329.105		77.3	-46.4737	-6055.04		77.3	-150.08	-1548.56
77.4	-4.68792	-0.142029	-1.38742	-2.30762		77.4	2.70993	-6.4835	-1.30973	1.16941		77.4	-28.6836	-571.668		77.4	-36.1981	-2548.65		77.4	-607.165	-1310.78		77.4	-9.87388	-325.991		77.4	-59.5517	-6041.34		77.4	-150.08	-1544.51
77.5	-2.81963	0.480988	-2.3215	-1.68477		77.5	-4.14059	-5.23791	1.18169	1.4807		77.5	-31.7974	-575.405		77.5	-35.264	-2543.98		77.5	-604.363	-1331.02		77.5	-10.808	-330.039		77.5	-57.372	-6065.31		77.5	-150.08	-1545.44
77.6	-0.0172081	-2.32118	-3.25558	-2.61882		77.6	-2.58383	-0.567131	-0.68623	4.28303		77.6	-28.995	-578.518		77.6	-37.755	-2535.57		77.6	-602.495	-1347.83		77.6	-14.2332	-331.596		77.6	-48.6534	-6078.08		77.6	-146.966	-1540.77
77.7	-0.0172081	-3.56647	-2.00999	-2.93013		77.7	-0.092926	-3.36949	-1.93139	3.97156		77.7	-28.0608	-573.848		77.7	-34.0185	-2531.21		77.7	-609.345	-1330.09		77.7	-8.93974	-338.135		77.7	-50.833	-6062.51		77.7	-148.834	-1537.97
77.8	2.78522	-2.00931	-1.69856	-0.439011		77.8	-2.58412	-3.6808	-1.61964	0.857658		77.8	-26.8153	-572.914		77.8	-37.4437	-2537.13		77.8	-604.363	-1327.28		77.8	-14.2332	-342.494		77.8	-51.7672	-6037.6		77.8	-148.834	-1537.03
77.9	-7.80172	-2.32043	-2.32126	-0.127533		77.9	3.02057	-1.81245	-1.61927	3.03723		77.9	-27.1267	-570.734		77.9	-36.8209	-2532.46		77.9	-605.297	-1323.55		77.9	-13.2991	-347.476		77.9	-51.7672	-6038.53		77.9	-153.193	-1539.84
78	-6.24482	-2.0088	-1.69844	-1.37299		78	4.88872	-0.566862	-0.684762	5.52818		78	-25.5698	-567.62		78	-35.8868	-2530.9		78	-605.92	-1310.16		78	-13.9218	-345.608		78	-44.6054	-6036.66		78	-147.589	-1544.51
78.1	0.294174	-1.38579	-0.141449	-0.750122		78.1	1.77477	-3.05784	0.249748	5.52809		78.1	-27.7494	-574.782		78.1	-38.0664	-2524.67		78.1	-612.147	-1308.91		78.1	-16.1015	-347.476		78.1	-43.9827	-6022.65		78.1	-155.996	-1546.69
78.2	-0.328587	-4.18796	1.41551	0.495468		78.2	0.217712	-1.81225	-2.24093	4.59386		78.2	-29.3063	-575.405		78.2	-42.1144	-2518.45		78.2	-605.297	-1307.04		78.2	-11.4308	-341.871		78.2	-47.4078	-6012.38		78.2	-162.224	-1545.44
78.3	-6.24482	-2.00806	-1.38686	0.806931		78.3	-1.65071	-3.36909	-0.99504	-0.0769429		78.3	-25.5698	-566.997		78.3	-46.7851	-2510.97		78.3	-606.543	-1304.24		78.3	-13.2991	-335.333		78.3	-48.9647	-6022.96		78.3	-155.062	-1546.06
78.4	-8.42448	-1.07365	-2.32094	-0.127121		78.4	-7.56709	-1.50073	-2.55158	-0.699797		78.4	-26.1925	-560.77		78.4	-47.7192	-2504.75		78.4	-607.788	-1315.45		78.4	-15.1674	-335.021		78.4	-54.5696	-6012.69		78.4	-152.259	-1547.31
78.5	-4.68792	-1.69617	-1.38673	-2.92947		78.5	-4.76482	-2.43481	-0.371545	2.10254		78.5	-28.0608	-567.309		78.5	-48.0306	-2495.09		78.5	-604.363	-1321.68		78.5	-17.9698	-334.398		78.5	-52.7013	-5992.76		78.5	-151.948	-1541.39
78.6	-6.24482	-2.00729	-1.69806	-1.06111		78.6	2.08542	-3.36889	-3.1736	3.65935		78.6	-25.2584	-566.375		78.6	-44.6054	-2494.78		78.6	-599.069	-1328.53		78.6	-15.7901	-334.71		78.6	-51.1444	-5985.29		78.6	-146.966	-1528.32
78.7	-3.75378	-0.450134	-1.07523	-1.06102		78.7	-1.96268	-3.99158	-4.41876	2.72511		78.7	-28.0608	-561.392		78.7	-48.0306	-2503.5		78.7	-599.381	-1326.35		78.7	-12.9877	-337.201		78.7	-48.6534	-5982.17		78.7	-147.9	-1521.78
78.8	-1.26273	-2.31816	0.481735	0.184586		78.8	-5.6994	-3.05737	-0.681823	-0.388783		78.8	-28.6836	-561.392		78.8	-50.2103	-2510.97		78.8	-600.315	-1314.83		78.8	-8.62836	-337.201		78.8	-51.1444	-5977.19		78.8	-145.409	-1530.81
78.9	-0.328587	-0.761017	-1.0751	0.184662		78.9	-3.2085	-5.54835	0.564066	1.47941		78.9	-28.0608	-571.979		78.9	-48.9647	-2517.2		78.9	-599.381	-1321.99		78.9	-12.9877	-344.985		78.9	-48.342	-5961		78.9	-151.014	-1537.03
79	4.03074	-1.38351	-0.1409	-1.06078		79	-3.52002	-4.92552	1.80996	-0.700348		79	-25.5698	-571.668		79	-43.3599	-2509.1		79	-597.513	-1321.99		79	-14.2332	-345.919		79	-47.7192	-5957.26		79	-149.768	-1530.5
79.1	4.03074	-0.760513	-2.00912	-1.0607		79.1	-8.50226	-5.85959	-2.23762	2.10199		79.1	-25.2584	-562.327		79.1	-41.4916	-2507.86		79.1	-586.614	-1317.32		79.1	-12.3649	-348.099		79.1	-39.3119	-5978.12		79.1	-149.457	-1520.84
79.2	4.6535	-2.93991	-0.452164	0.496292		79.2	-9.12517	-1.81158	-3.1714	3.6588		79.2	-26.5039	-569.8		79.2	-36.8209	-2516.27		79.2	-587.548	-1312.03		79.2	-10.808	-348.099		79.2	-44.294	-5974.08		79.2	-151.014	-1525.2
79.3	4.96488	-2.6283	0.48204	0.184998		79.3	-10.0594	-0.254606	-0.679987	3.65871		79.3	-27.7494	-562.949		79.3	-40.5575	-2518.14		79.3	-594.71	-1310.47		79.3	-10.4966	-339.38		79.3	-50.2103	-5948.54		79.3	-150.391	-1527.69
79.4	3.71936	0.174393	2.039	-1.9946		79.4	-3.20923	-3.67973	-1.92514	2.72447		79.4	-26.5039	-551.117		79.4	-34.0185	-2517.51		79.4	-598.758	-1307.36		79.4	-10.808	-332.219		79.4	-51.4558	-5947.61		79.4	-141.05	-1523.02
79.5	2.78522	-1.38226	-0.451981	0.807922		79.5	-6.32318	-3.67966	-0.679253	3.03576		79.5	-21.8332	-556.099		79.5	-34.3299	-2520.63		79.5	-600.004	-1304.86		79.5	-8.62836	-322.566		79.5	-50.833	-5945.74		79.5	-142.607	-1524.58
79.6	1.22831	-1.382	-2.32021	2.05351		79.6	-9.7485	-1.81131	-0.990266	2.10153		79.6	-23.3901	-557.033		79.6	-34.9526	-2520.31		79.6	-595.021	-1320.74		79.6	-10.808	-316.338		79.6	-49.5875	-5957.89		79.6	-145.72	-1518.04
79.7	0.294174	-1.69315	-2.94289	0.185318		79.7	-6.94623	-2.12262	1.50115	2.7242		79.7	-22.456	-569.177		79.7	-30.9047	-2516.58		79.7	-592.842	-1326.66		79.7	-4.26903	-330.039		79.7	-57.6834	-5963.8		79.7	-143.229	-1518.35
79.8	5.27626	-2.00427	-1.07454	-0.748734		79.8	-4.76671	-0.565649	-0.0553899	3.03548		79.8	-22.7674	-577.273		79.8	-36.1981	-2521.25		79.8	-584.435	-1324.48		79.8	-8.62836	-332.219		79.8	-62.0427	-5953.84		79.8	-143.541	-1528.63
79.9	5.58764	-1.69264	-0.763107	0.185486		79.9	-5.701	-1.49973	-0.677783	3.96953		79.9	-25.2584	-574.47		79.9	-35.8868	-2515.33		79.9	-577.584	-1336		79.9	-12.0535	-333.464		79.9	-65.1565	-5951.97		79.9	-141.672	-1528.63
80	3.40798	-1.06963	-1.3858	1.43108		80	-3.83286	0.368626	-0.988797	1.16702		80	-24.947	-563.572		80	-34.9526	-2509.1		80	-572.291	-1336.63		80	-8.93974	-336.889		80	-60.7972	-5956.64		80	-142.918	-1530.5
80.1	-0.328587	-1.69214	-0.762985	0.808411		80.1	-4.45576	-0.876829	-3.47947	-0.389978		80.1	-22.1446	-566.063		80.1	-37.4437	-2507.86		80.1	-571.668	-1318.25		80.1	-3.64627	-333.776		80.1	-52.3899	-5942.32		80.1	-145.409	-1525.51
80.2	2.16246	-1.69188	-0.762924	-0.748413		80.2	-0.719345	0.368759	-1.61082	1.16683		80.2	-23.3901	-570.422		80.2	-37.1323	-2510.97		80.2	-572.291	-1312.65		80.2	-6.4487	-333.153		80.2	-48.342	-5922.08		80.2	-139.181	-1525.51
80.3	4.34212	-0.134735	-1.38562	0.497192		80.3	-2.58777	-1.81084	-0.364934	2.72364		80.3	-23.0787	-582.566		80.3	-41.803	-2502.57		80.3	-572.602	-1313.89		80.3	-7.38284	-333.776		80.3	-49.5875	-5926.12		80.3	-141.05	-1520.84
80.4	3.0966	-2.31413	0.482727	-0.125488		80.4	-4.76759	-3.36767	-0.675948	1.78941		80.4	-21.5218	-582.566		80.4	-46.4737	-2507.86		80.4	-575.093	-1315.76		80.4	-7.69422	-333.153		80.4	-52.3899	-5956.95		80.4	-141.05	-1513.06
80.5	2.16246	-0.134232	-0.762741	-0.125412		80.5	-3.21083	-1.8107	-0.675581	3.6576		80.5	-23.3901	-571.357		80.5	-45.8509	-2506.61		80.5	-581.321	-1328.22		80.5	-2.08937	-342.806		80.5	-46.4737	-5952.28		80.5	-144.786	-1512.75
80.6	2.78522	-2.00226	-2.31958	0.186066		80.6	-3.52235	-1.81063	-0.675213	1.16646		80.6	-22.7674	-562.949		80.6	-41.4916	-2500.07		80.6	-571.045	-1337.56		80.6	-5.82593	-348.41		80.6	-50.833	-5953.53		80.6	-141.05	-1511.81
80.7	3.0966	1.1118	0.48291	1.74304		80.7	-2.27698	2.23738	-2.85451	3.03466		80.7	-21.8332	-564.506		80.7	-36.8209	-2492.6		80.7	-566.063	-1329.46		80.7	-7.07146	-349.033		80.7	-48.342	-5962.56		80.7	-137.002	-1513.99
80.8	6.2104	-0.444839	-0.762558	-1.3707		80.8	0.525299	0.369164	1.19381	3.03456		80.8	-21.8332	-564.195		80.8	-39.0006	-2498.21		80.8	-569.488	-1340.67		80.8	-7.07146	-341.56		80.8	-53.9468	-5948.23		80.8	-133.888	-1523.02
80.9	1.85108	1.1123	-1.69664	0.497681		80.9	-5.39107	1.61476	0.260031	2.41171		80.9	-22.7674	-560.147		80.9	-39.6233	-2492.6		80.9	-570.111	-1346.28		80.9	-6.76008	-330.973		80.9	-57.0606	-5941.07		80.9	-137.936	-1528
81	4.96488	1.42395	-0.139664	-0.125		81	-3.52293	-0.56484	-2.85341	0.854716		81	-21.8332	-559.213		81	-41.1802	-2488.24		81	-566.997	-1340.05		81	-8.62836	-332.53		81	-60.7972	-5935.47		81	-137.002	-1531.12
81.1	6.83317	-1.06686	0.79454	-0.747665		81.1	-0.720657	-4.61272	1.50629	2.41153		81.1	-18.7194	-561.392		81.1	-43.9827	-2491.67		81.1	-566.686	-1335.07		81.1	-12.3649	-326.925		81.1	-57.372	-5942.94		81.1	-140.115	-1538.59
81.2	4.96488	-0.755219	-2.94197	1.12068		81.2	-0.409424	-0.253326	1.19527	3.0342		81.2	-22.456	-561.704		81.2	-40.5575	-2491.67		81.2	-574.782	-1337.25		81.2	-16.7243	-319.452		81.2	-53.3241	-5929.55		81.2	-139.804	-1535.17
81.3	8.07869	-1.37773	2.97432	1.74353		81.3	4.26114	-0.87602	-1.60678	3.96825		81.3	-20.5877	-561.704		81.3	-41.803	-2497.9		81.3	-572.291	-1325.73		81.3	-13.2991	-318.207		81.3	-53.9468	-5927.06		81.3	-139.804	-1540.77
81.4	2.47384	-0.443329	-0.762177	-0.124664		81.4	1.45857	-2.43286	-0.0495138	1.47711		81.4	-23.3901	-561.081		81.4	-40.5575	-2491.67		81.4	-575.716	-1334.45		81.4	-12.6763	-318.518		81.4	-56.1265	-5947.61		81.4	-135.756	-1524.58
81.5	-0.0172081	-4.17966	-1.38487	1.43231		81.5	3.01532	-3.05555	0.262234	3.03392		81.5	-23.3901	-567.931		81.5	-36.5095	-2492.6		81.5	-578.83	-1337.56		81.5	-14.5446	-319.141		81.5	-55.8151	-5941.38		81.5	-135.133	-1528
81.6	0.605553	-2.6225	-0.139282	0.186874		81.6	2.70381	-1.49858	0.573982	0.542783		81.6	-21.5218	-563.572		81.6	-35.5754	-2487.62		81.6	-576.961	-1323.86		81.6	-12.3649	-324.746		81.6	-54.2582	-5924.26		81.6	-137.313	-1534.23
81.7	-1.26273	-0.442581	-0.761993	2.36662		81.7	-2.9012	-4.9237	1.81987	1.16545		81.7	-26.1925	-555.788		81.7	-39.0006	-2482.64		81.7	-575.405	-1327.28		81.7	-13.2991	-310.422		81.7	-59.2403	-5906.51		81.7	-138.247	-1541.08
81.8	-1.88549	-1.06509	1.72913	1.74394		81.8	2.39214	-4.61225	1.19748	3.96779		81.8	-26.1925	-564.818		81.8	-39.3119	-2486.37		81.8	-576.027	-1324.48		81.8	-13.2991	-303.572		81.8	-56.4379	-5909.31		81.8	-137.002	-1538.59
81.9	-1.88549	0.803436	-0.139099	-0.124268		81.9	1.76923	-2.7439	0.575084	2.41079		81.9	-29.3063	-553.297		81.9	-43.6713	-2487.93		81.9	-577.584	-1319.5		81.9	-12.6763	-308.554		81.9	-54.881	-5924.26		81.9	-142.295	-1531.12
82	1.5397	-1.68735	0.483719	1.43272		82	-0.410583	-0.875549	0.886831	-0.703107		82	-29.9291	-563.261		82	-40.5575	-2490.11		82	-571.668	-1320.43		82	-11.1194	-303.883		82	-51.1444	-5891.56		82	-141.984	-1527.38
82.1	1.22831	-0.130203	1.72931	2.05556		82.1	2.70308	-4.92343	-1.60385	3.65613		82.1	-25.8812	-558.901		82.1	-37.1323	-2482.64		82.1	-572.291	-1318.25		82.1	-8.0056	-294.542		82.1	-54.5696	-5863.23		82.1	-141.05	-1523.65
82.2	-0.639969	-1.37546	1.41798	2.05565		82.2	-1.03365	-3.67784	-0.046576	2.09913		82.2	-23.3901	-552.674		82.2	-40.8688	-2480.15		82.2	-575.405	-1315.14		82.2	-8.93974	-289.248		82.2	-53.6355	-5866.65		82.2	-143.541	-1511.5
82.3	-3.75378	-1.99799	-0.450241	1.12158		82.3	-0.411026	-3.98915	0.887933	2.09904		82.3	-27.4381	-554.542		82.3	-37.755	-2471.74		82.3	-578.207	-1305.8		82.3	-8.31698	-290.182		82.3	-48.9647	-5870.7		82.3	-141.05	-1511.81
82.4	-2.81963	-0.752197	-0.138794	2.36719		82.4	-4.14775	-4.61185	0.57692	1.47619		82.4	-25.8812	-559.213		82.4	-33.3957	-2468.31		82.4	-572.291	-1310.16		82.4	-13.2991	-303.26		82.4	-50.5216	-5870.7		82.4	-141.361	-1522.71
82.5	-2.50825	-0.751953	-0.761505	0.810379		82.5	1.45697	-2.74349	-0.979616	1.4761		82.5	-23.7015	-558.59		82.5	-34.9526	-2471.12		82.5	-572.291	-1317.01		82.5	-13.9218	-310.733		82.5	-51.7672	-5888.76		82.5	-139.493	-1523.02
82.6	-1.57411	-1.0631	1.72961	1.43321		82.6	0.211288	-9.90518	-0.356488	2.72153		82.6	-21.5218	-548.003		82.6	-35.264	-2472.98		82.6	-575.716	-1311.71		82.6	-9.87388	-307.931		82.6	-51.1444	-5879.42		82.6	-137.624	-1524.27
82.7	-5.93344	-1.06284	-0.761383	0.187775		82.7	-1.34575	-6.16855	-0.0447397	-0.0809889		82.7	-23.7015	-551.117		82.7	-33.7071	-2468.63		82.7	-572.914	-1312.96		82.7	-10.1853	-301.392		82.7	-47.0965	-5882.53		82.7	-141.05	-1521.47
82.8	-6.24482	0.805695	1.10696	1.12199		82.8	0.210999	-1.80915	-0.0443726	2.09858		82.8	-22.7674	-554.231		82.8	-32.773	-2473.3		82.8	-567.62	-1302.06		82.8	-9.87388	-303.572		82.8	-45.8509	-5890		82.8	-142.607	-1522.09
82.9	-4.06516	0.805954	0.795654	0.810699		82.9	-1.9688	-1.18633	-0.666767	3.96677		82.9	-24.947	-557.033		82.9	-34.0185	-2464.27		82.9	-572.602	-1296.15		82.9	-11.1194	-312.602		82.9	-45.8509	-5855.75		82.9	-137.624	-1520.53
83	-9.35863	-0.127945	1.72987	2.99045		83	-1.96895	-4.61144	1.20188	3.96668		83	-22.7674	-554.542		83	-32.773	-2463.64		83	-578.207	-1295.52		83	-8.93974	-319.763		83	-41.803	-5840.18		83	-139.493	-1510.88
83.1	-7.80172	-2.61873	0.173019	1.43362		83.1	-5.70567	-5.54552	0.26811	2.72107		83.1	-25.2584	-555.788		83.1	-36.8209	-2477.97		83.1	-573.848	-1285.56		83.1	-9.25112	-313.536		83.1	-44.6054	-5856.69		83.1	-140.427	-1509.01
83.2	-3.75378	0.183945	0.484467	4.5475		83.2	-4.46028	-3.67717	0.268477	3.34374		83.2	-23.3901	-551.74		83.2	-36.8209	-2486.37		83.2	-566.063	-1290.23		83.2	-12.0535	-310.733		83.2	-40.5575	-5846.1		83.2	-142.918	-1507.77
83.3	-1.88549	1.42973	2.04143	3.61346		83.3	-4.46043	-6.79091	1.51437	0.54122		83.3	-22.456	-550.805		83.3	-31.216	-2488.24		83.3	-564.506	-1298.95		83.3	-9.25112	-310.111		83.3	-43.0485	-5838.94		83.3	-146.343	-1510.57
83.4	-4.68792	0.495834	1.73012	2.05663		83.4	-4.46057	-2.74289	2.44888	1.16389		83.4	-20.8991	-548.314		83.4	-35.8868	-2484.19		83.4	-564.506	-1300.19		83.4	-7.38284	-311.979		83.4	-40.8688	-5853.26		83.4	-151.637	-1509.63
83.5	-4.06516	0.807465	2.35294	0.188431		83.5	1.76689	-5.54525	1.82648	1.1638		83.5	-18.0966	-550.183		83.5	-38.3778	-2482.95		83.5	-566.686	-1310.47		83.5	-7.69422	-308.865		83.5	-41.803	-5854.51		83.5	-150.391	-1511.81
83.6	-0.328587	0.184952	0.173325	1.74542		83.6	0.209839	-1.49723	0.892707	3.03199		83.6	-20.8991	-551.117		83.6	-35.5754	-2484.51		83.6	-556.099	-1299.57		83.6	-11.4308	-317.272		83.6	-40.2461	-5845.17		83.6	-144.475	-1507.77
83.7	0.916935	0.185211	-0.760757	1.43411		83.7	3.01212	-0.563021	1.82722	1.16361		83.7	-18.7194	-558.59		83.7	-33.3957	-2481.7		83.7	-557.344	-1285.56		83.7	-12.9877	-321.632		83.7	-41.1802	-5828.04		83.7	-140.738	-1514.62
83.8	1.5397	-2.92834	1.10759	2.05695		83.8	0.209534	-1.80848	0.893442	1.16352		83.8	-19.3422	-558.901		83.8	-36.8209	-2480.15		83.8	-557.344	-1270.61		83.8	-12.9877	-316.65		83.8	-33.7071	-5811.85		83.8	-133.265	-1518.35
83.9	-0.639969	0.808472	3.59869	1.43428		83.9	-3.21579	-2.43117	1.51657	0.229288		83.9	-18.408	-571.979		83.9	-41.1802	-2476.72		83.9	-557.656	-1276.22		83.9	-13.2991	-312.29		83.9	-35.264	-5808.73		83.9	-132.331	-1519.29
84	-1.88549	1.1201	0.796341	0.8116		84	-4.46146	-5.85629	0.582796	1.7861		84	-21.5218	-580.387		84	-37.4437	-2471.12		84	-558.279	-1278.4		84	-10.1853	-307.62		84	-42.7371	-5800.33		84	-137.936	-1509.32
84.1	2.16246	1.12036	3.9102	-0.122452		84.1	-11.0006	-4.92208	-0.97374	0.851865		84.1	-19.3422	-577.584		84.1	-38.6892	-2472.36		84.1	-557.967	-1279.33		84.1	-3.33489	-301.703		84.1	-45.5396	-5790.99		84.1	-131.085	-1509.94
84.2	4.34212	-0.124924	2.35336	1.43452		84.2	-9.75522	-2.43097	2.76319	1.47453		84.2	-17.1625	-574.782		84.2	-39.0006	-2472.05		84.2	-554.853	-1297.08		84.2	-6.13731	-306.374		84.2	-44.294	-5793.48		84.2	-136.379	-1504.34
84.3	3.0966	-0.124664	-0.449005	1.74599		84.3	-4.15051	-3.67643	0.272517	0.851681		84.3	-17.7853	-567.309		84.3	-35.264	-2463.64		84.3	-550.805	-1311.71		84.3	-7.69422	-297.344		84.3	-31.5274	-5818.7		84.3	-139.493	-1494.38
84.4	5.89902	-0.435791	0.796585	3.92574		84.4	-3.21652	-1.80807	0.895645	0.85159		84.4	-21.8332	-564.506		84.4	-34.6412	-2468		84.4	-554.853	-1311.09		84.4	-10.808	-302.326		84.4	-34.6412	-5819.01		84.4	-137.313	-1490.33
84.5	9.63559	1.12137	1.10802	3.30305		84.5	-2.90527	-3.36491	1.83015	1.16288		84.5	-15.917	-558.279		84.5	-38.3778	-2476.72		84.5	-555.165	-1295.21		84.5	-10.808	-306.374		84.5	-37.1323	-5822.12		84.5	-135.756	-1502.78
84.6	9.94697	1.12161	-1.07158	1.12346		84.6	-1.97128	-1.49656	0.896379	2.09693		84.6	-19.3422	-563.572		84.6	-38.6892	-2473.92		84.6	-550.183	-1290.23		84.6	-3.33489	-305.751		84.6	-39.0006	-5823.99		84.6	-134.822	-1509.63
84.7	5.89902	4.23567	0.796783	2.05769		84.7	0.208221	-3.67616	-0.348776	0.539933		84.7	-22.1446	-566.375		84.7	-39.6233	-2478.28		84.7	-553.608	-1301.44		84.7	-2.40075	-304.506		84.7	-39.6233	-5809.05		84.7	-135.756	-1513.68
84.8	4.03074	2.05626	0.174072	3.92606		84.8	-3.83986	-6.16714	2.45402	1.47398		84.8	-23.0787	-562.949		84.8	-38.6892	-2475.48		84.8	-559.524	-1295.83		84.8	-5.20317	-305.129		84.8	-47.4078	-5797.84		84.8	-137.936	-1509.94
84.9	1.85108	-0.123154	1.41966	4.5489		84.9	-1.66034	-3.36464	3.69991	1.47389		84.9	-20.8991	-550.183		84.9	-40.8688	-2472.05		84.9	-560.77	-1298.95		84.9	-7.69422	-308.242		84.9	-41.1802	-5797.21		84.9	-135.756	-1511.19
85	0.294174	2.05676	3.28801	3.61485		85	2.07608	-6.78976	2.76613	-0.705865		85	-18.7194	-539.596		85	-40.5575	-2464.89		85	-551.74	-1298.64		85	-3.02351	-317.895		85	-37.1323	-5794.72		85	-134.199	-1513.37
85.1	4.03074	1.74564	3.91083	6.10597		85.1	-1.03787	-6.78969	2.14374	-1.6401		85.1	-21.2104	-547.38		85.1	-34.6412	-2460.53		85.1	-550.183	-1308.29		85.1	-5.20317	-317.272		85.1	-38.3778	-5800.64		85.1	-140.738	-1515.55
85.2	3.71936	-0.122406	3.28813	3.30363		85.2	-5.08595	-5.23272	2.14411	0.850854		85.2	-19.9649	-563.883		85.2	-38.3778	-2457.73		85.2	-552.674	-1314.52		85.2	-3.33489	-316.027		85.2	-40.2461	-5808.11		85.2	-141.672	-1516.48
85.3	-0.0172081	1.74614	2.66542	0.189911		85.3	-1.97231	-5.23265	1.83309	3.03043		85.3	-21.5218	-556.099		85.3	-38.6892	-2456.17		85.3	-553.919	-1307.98		85.3	-3.33489	-319.141		85.3	-34.3299	-5805.93		85.3	-139.181	-1514.3
85.4	-0.951347	-0.121902	-0.759705	0.812744		85.4	-0.104156	-5.23259	5.57003	2.09619		85.4	-24.3243	-553.297		85.4	-42.4258	-2470.49		85.4	-555.165	-1309.85		85.4	-4.58041	-316.338		85.4	-32.1502	-5797.52		85.4	-137.624	-1516.17
85.5	-4.06516	-0.433014	2.04279	2.99249		85.5	-1.66121	-1.49595	3.70211	3.653		85.5	-20.2763	-554.542		85.5	-39.6233	-2479.21		85.5	-553.919	-1312.03		85.5	-4.89179	-322.566		85.5	-26.5453	-5792.54		85.5	-136.379	-1514.93
85.6	-4.06516	1.43552	1.42009	2.6812		85.6	-1.34999	-0.250362	-3.1479	-0.0836554		85.6	-20.8991	-542.087		85.6	-39.0006	-2470.81		85.6	-550.183	-1302.37		85.6	-1.77799	-320.075		85.6	-26.234	-5767.94		85.6	-134.511	-1513.06
85.7	-2.50825	-1.67804	2.66566	1.74713		85.7	-2.28427	-0.561674	-0.345103	2.4073		85.7	-19.0308	-544.889		85.7	-37.1323	-2464.58		85.7	-552.051	-1296.15		85.7	-4.26903	-315.404		85.7	-33.0843	-5774.17		85.7	-135.133	-1498.73
85.8	-0.328587	1.12463	3.2885	4.54964		85.8	-1.97304	-1.80713	0.900786	3.02997		85.8	-18.7194	-542.71		85.8	-43.6713	-2459.6		85.8	-552.674	-1301.13		85.8	-9.5625	-311.979		85.8	-41.1802	-5786.94		85.8	-135.445	-1491.57
85.9	-3.75378	0.19075	0.174744	2.05867		85.9	1.7634	-3.05259	-0.0329881	0.227449		85.9	-18.0966	-538.039		85.9	-40.2461	-2461.15		85.9	-549.249	-1298.33		85.9	-1.77799	-313.224		85.9	-43.3599	-5778.84		85.9	-132.954	-1501.23
86	-3.44239	2.05928	2.04309	3.92705		86	3.9429	-4.9208	1.2129	0.227357		86	-21.2104	-537.727		86	-38.0664	-2472.36		86	-551.428	-1294.59		86	-4.26903	-304.817		86	-40.8688	-5772.61		86	-135.445	-1502.16
86.1	-6.24482	-1.05428	2.35454	1.74747		86.1	1.76311	-4.60936	-1.58916	-1.01826		86.1	-16.5397	-535.859		86.1	-41.803	-2468.31		86.1	-556.099	-1296.77		86.1	-4.89179	-304.194		86.1	-36.8209	-5764.21		86.1	-130.151	-1502.16
86.2	-6.86758	-1.3654	2.3546	0.8134		86.2	3.00847	-6.78895	-0.654647	-1.32973		86.2	-21.8332	-536.793		86.2	-42.1144	-2465.51		86.2	-554.231	-1311.09		86.2	-8.0056	-304.194		86.2	-42.4258	-5759.54		86.2	-135.133	-1499.98
86.3	-0.328587	0.191757	2.04329	3.30453		86.3	2.07419	-4.60922	3.70505	-1.6412		86.3	-23.3901	-537.727		86.3	-42.4258	-2465.2		86.3	-554.231	-1305.18		86.3	-5.51455	-301.703		86.3	-51.1444	-5742.41		86.3	-132.331	-1511.19
86.4	-0.639969	1.12614	4.22302	2.99323		86.4	0.20575	-3.05225	4.32818	1.16113		86.4	-20.5877	-536.793		86.4	-40.8688	-2471.74		86.4	-552.362	-1304.86		86.4	-5.20317	-305.44		86.4	-45.8509	-5734		86.4	-134.511	-1515.55
86.5	-3.75378	-0.741882	-1.07039	3.30469		86.5	3.94217	-4.2977	0.903357	2.09518		86.5	-22.1446	-537.105		86.5	-39.0006	-2472.36		86.5	-551.74	-1318.57		86.5	-1.46661	-306.063		86.5	-45.5396	-5737.12		86.5	-138.247	-1512.12
86.6	-3.75378	2.06079	1.42072	3.30478		86.6	2.38513	-2.74073	1.52649	-0.395956		86.6	-19.6535	-548.003		86.6	-35.5754	-2467.38		86.6	-552.362	-1323.24		86.6	-2.08937	-311.979		86.6	-47.4078	-5738.05		86.6	-137.313	-1505.9
86.7	-2.81963	2.06105	1.42078	1.74796		86.7	-0.106064	-4.60895	1.83823	0.226713		86.7	-19.3422	-553.608		86.7	-35.5754	-2468		86.7	-551.74	-1312.65		86.7	-4.26903	-302.638		86.7	-50.833	-5743.97		86.7	-137.936	-1503.09
86.8	-6.24482	2.06129	3.28912	2.99355		86.8	0.516556	-5.54303	2.46136	3.02905		86.8	-19.9649	-559.524		86.8	-35.5754	-2468.94		86.8	-551.428	-1317.01		86.8	-3.64627	-303.26		86.8	-54.2582	-5744.59		86.8	-134.199	-1499.36
86.9	-4.9993	1.4388	1.73228	1.74812		86.9	2.0733	-1.80639	3.08449	-1.01899		86.9	-20.8991	-552.985		86.9	-34.6412	-2447.45		86.9	-544.889	-1318.88		86.9	-4.89179	-317.584		86.9	-48.0306	-5746.77		86.9	-129.217	-1505.59
87	-6.24482	2.37317	2.04372	1.43681		87	2.69594	-1.80632	3.39624	0.226438		87	-23.3901	-546.135		87	-32.1502	-2441.54		87	-548.003	-1312.96		87	-1.15522	-320.075		87	-45.8509	-5753.31		87	-125.792	-1506.52
87.1	-3.44239	2.37343	2.35516	1.4369		87.1	3.9413	-3.05178	4.33075	-0.396415		87.1	-16.5397	-540.53		87.1	-33.0843	-2439.04		87.1	-553.297	-1312.96		87.1	-2.08937	-320.075		87.1	-52.3899	-5773.24		87.1	-129.529	-1495.93
87.2	-4.37654	3.93059	1.42108	3.30527		87.2	2.38425	-4.91999	0.594547	0.537634		87.2	-19.3422	-542.398		87.2	-29.9705	-2438.11		87.2	-551.74	-1311.71		87.2	-3.95765	-323.5		87.2	-49.8989	-5762.03		87.2	-129.217	-1495
87.3	-5.62206	0.817032	2.0439	2.3712		87.3	3.31825	-0.560596	-1.58475	-1.64212		87.3	-21.5218	-554.853		87.3	-34.6412	-2433.75		87.3	-547.069	-1301.75		87.3	-4.89179	-321.632		87.3	-45.5396	-5746.15		87.3	-124.546	-1503.72
87.4	-6.86758	0.194519	-0.758469	0.814392		87.4	0.827057	-0.56053	0.595282	-1.33083		87.4	-21.5218	-551.428		87.4	-33.7071	-2428.46		87.4	-542.087	-1292.72		87.4	-1.15522	-319.452		87.4	-42.1144	-5745.83		87.4	-125.792	-1500.29
87.5	-6.86758	2.68582	1.73265	1.12584		87.5	0.515533	-3.36289	1.21841	0.848739		87.5	-19.6535	-542.087		87.5	-34.3299	-2429.7		87.5	-546.446	-1296.46		87.5	0.713059	-311.356		87.5	-35.8868	-5747.08		87.5	-123.612	-1500.29
87.6	-4.68792	4.24297	1.73271	2.37144		87.6	1.76091	-1.49454	1.53016	1.47141		87.6	-17.4739	-544.578		87.6	-34.9526	-2425.66		87.6	-542.398	-1293.65		87.6	-0.221083	-312.29		87.6	-34.6412	-5732.13		87.6	-131.085	-1507.14
87.7	-1.88549	0.818039	2.04414	2.68292		87.7	-5.0896	-3.98552	0.285003	-1.33111		87.7	-20.8991	-545.201		87.7	-32.1502	-2423.48		87.7	-542.398	-1294.59		87.7	0.713059	-306.374		87.7	-34.6412	-5706.91		87.7	-126.415	-1501.85
87.8	0.294174	4.55486	2.0442	0.503326		87.8	-2.28734	-1.4944	2.46503	-1.01982		87.8	-19.0308	-558.279		87.8	-30.5933	-2416.62		87.8	-538.039	-1296.46		87.8	-0.843844	-300.769		87.8	-40.5575	-5707.22		87.8	-123.924	-1496.56
87.9	-0.639969	0.818542	-0.758163	-0.430725		87.9	-4.77852	0.99671	0.285738	-0.708532		87.9	-20.2763	-565.44		87.9	-30.5933	-2425.66		87.9	-538.039	-1303		87.9	-3.95765	-301.081		87.9	-48.342	-5703.18		87.9	-123.612	-1495
88	-0.0172081	3.30983	-0.135315	2.06039		88	-3.84453	-2.73979	0.908866	-1.33139		88	-20.2763	-565.752		88	-32.773	-2424.72		88	-541.153	-1284.31		88	-5.51455	-288.003		88	-40.8688	-5707.85		88	-122.99	-1499.67
88.1	-1.26273	0.819046	1.11026	1.12633		88.1	-0.730881	-2.42834	3.0889	-1.33148		88.1	-20.8991	-563.883		88.1	-34.3299	-2419.43		88.1	-538.662	-1286.8		88.1	-4.26903	-284.266		88.1	-39.9347	-5711.27		88.1	-122.055	-1504.34
88.2	-0.0172081	1.75343	1.73309	0.503662		88.2	4.25108	0.374149	0.9096	-1.02019		88.2	-19.3422	-551.74		88.2	-31.216	-2422.85		88.2	-542.398	-1292.1		88.2	-3.64627	-288.937		88.2	-37.1323	-5726.53		88.2	-124.235	-1504.65
88.3	3.71936	4.55612	2.97867	0.503738		88.3	4.5623	1.30836	-0.335555	2.09353		88.3	-22.456	-545.823		88.3	-37.1323	-2438.11		88.3	-542.398	-1286.49		88.3	-1.46661	-292.051		88.3	-36.8209	-5733.07		88.3	-125.169	-1507.77
88.4	1.22831	0.819794	0.487686	2.68349		88.4	3.93941	-1.80538	1.84448	2.09343		88.4	-22.7674	-555.476		88.4	-30.9047	-2445.89		88.4	-538.973	-1303.93		88.4	-5.82593	-292.985		88.4	-40.2461	-5727.77		88.4	-124.546	-1506.21
88.5	-1.26273	1.7542	-0.13501	1.12666		88.5	3.62787	3.17678	2.77899	0.225058		88.5	-23.0787	-549.249		88.5	-33.7071	-2444.65		88.5	-534.302	-1308.29		88.5	-6.13731	-287.38		88.5	-41.1802	-5734.31		88.5	-122.99	-1508.39
88.6	-3.75378	2.68858	2.35609	0.815369		88.6	0.513931	2.55408	1.84521	-0.397795		88.6	-22.1446	-540.841		88.6	-37.1323	-2437.8		88.6	-538.973	-1312.96		88.6	-2.71213	-286.446		88.6	-37.1323	-5744.28		88.6	-126.726	-1508.08
88.7	-5.93344	2.37746	2.04477	0.192688		88.7	1.75931	0.374485	2.46834	-2.26617		88.7	-16.8511	-543.021		88.7	-39.9347	-2441.22		88.7	-538.039	-1320.12		88.7	-5.20317	-293.296		88.7	-39.3119	-5751.44		88.7	-129.529	-1499.36
88.8	-6.5562	0.198044	0.799316	2.68382		88.8	-1.04326	1.3087	3.09147	1.4703		88.8	-18.408	-547.692		88.8	-39.3119	-2441.22		88.8	-538.039	-1318.57		88.8	-1.46661	-295.164		88.8	-41.1802	-5742.1		88.8	-123.924	-1494.69
88.9	-4.9993	2.37794	-0.446152	1.43837		88.9	4.87282	-1.80504	-0.644732	2.40436		88.9	-22.456	-557.656		88.9	-39.0006	-2444.96		88.9	-546.135	-1300.51		88.9	-5.82593	-295.164		88.9	-34.0185	-5734.94		88.9	-122.055	-1493.75
89	-5.93344	2.68959	1.73358	1.12708		89	9.54337	-0.870834	-0.955745	4.27255		89	-16.2284	-552.985		89	-36.8209	-2448.39		89	-543.644	-1307.04		89	0.0902977	-297.033		89	-35.5754	-5727.15		89	-123.924	-1498.42
89.1	-3.13101	-0.112595	2.97916	2.68407		89.1	3.627	0.0633755	1.22429	-0.709636		89.1	-18.408	-551.74		89.1	-29.9705	-2451.81		89.1	-539.284	-1304.55		89.1	-3.64627	-298.278		89.1	-36.5095	-5733.38		89.1	-126.103	-1496.87
89.2	0.294174	0.199051	2.04507	0.1931		89.2	1.75858	-2.4276	2.47018	0.224414		89.2	-18.408	-549.56		89.2	-26.5453	-2443.09		89.2	-543.332	-1301.75		89.2	-1.46661	-302.015		89.2	-31.5274	-5737.43		89.2	-124.858	-1493.44
89.3	1.5397	1.44482	1.11099	-0.118195		89.3	6.74052	-0.55925	-0.643263	-1.33258		89.3	-18.408	-548.937		89.3	-31.8388	-2440.29		89.3	-539.596	-1305.49		89.3	-4.26903	-310.111		89.3	-32.1502	-5727.46		89.3	-124.546	-1489.08
89.4	-2.50825	1.44508	0.799683	2.06154		89.4	7.05176	1.62048	-0.0201344	1.46975		89.4	-18.7194	-554.853		89.4	-33.0843	-2439.98		89.4	-542.71	-1300.51		89.4	-3.02351	-317.584		89.4	-35.5754	-5710.96		89.4	-124.546	-1486.9
89.5	-0.951347	2.06808	1.73389	2.373		89.5	8.60851	0.686407	0.914374	0.8469		89.5	-17.1625	-551.74		89.5	-30.9047	-2449.01		89.5	-545.823	-1300.19		89.5	-3.95765	-320.075		89.5	-34.0185	-5695.08		89.5	-123.301	-1492.2
89.6	2.16246	1.75696	0.79982	1.12756		89.6	7.67422	-1.80457	0.914742	-0.710095		89.6	-19.3422	-559.524		89.6	-29.0364	-2443.4		89.6	-551.74	-1307.36		89.6	-5.20317	-317.272		89.6	-36.1981	-5698.19		89.6	-125.169	-1492.82
89.7	4.03074	2.37996	1.42264	0.193512		89.7	0.823715	-4.60693	1.84925	-0.398806		89.7	-20.8991	-562.015		89.7	-29.0364	-2451.19		89.7	-547.692	-1313.27		89.7	-2.71213	-307.931		89.7	-34.3299	-5721.24		89.7	-125.481	-1495.62
89.8	-2.19687	1.1347	0.488556	0.193604		89.8	-4.7813	-0.558912	1.22686	-3.20132		89.8	-18.7194	-560.77		89.8	-22.4974	-2453.37		89.8	-542.398	-1297.7		89.8	-8.31698	-295.476		89.8	-33.7071	-5715.94		89.8	-126.415	-1503.72
89.9	-4.68792	1.75771	0.488617	-0.117706		89.9	-1.66763	1.30944	1.53861	-0.710371		89.9	-18.7194	-552.362		89.9	-20.6291	-2449.63		89.9	-534.925	-1287.12		89.9	-1.15522	-299.835		89.9	-34.6412	-5693.83		89.9	-126.415	-1499.98
90	-0.328587	1.44659	0.800064	1.12788		90	-5.09296	1.93227	-0.640692	2.40334		90	-19.9649	-545.512		90	-26.5453	-2448.39		90	-527.452	-1292.1		90	-3.02351	-290.805		90	-39.3119	-5677.02		90	-131.708	-1496.24
90.1	1.85108	-0.110077	-0.134018	1.43936		90.1	-1.66792	-1.80424	1.22796	1.78049		90.1	-23.3901	-548.937		90.1	-27.4795	-2458.04		90.1	-531.188	-1299.57		90.1	-6.76008	-297.655		90.1	-40.8688	-5695.7		90.1	-127.972	-1491.88
90.2	5.27626	0.512955	0.800186	-0.117462		90.2	2.69127	3.4893	1.22833	0.223495		90.2	-20.2763	-545.201		90.2	-27.7909	-2448.7		90.2	-527.763	-1290.85		90.2	-8.62836	-300.458		90.2	-41.1802	-5686.67		90.2	-127.038	-1486.9
90.3	3.40798	1.75871	2.04576	-1.67429		90.3	-1.04546	4.73489	0.917313	0.846164		90.3	-19.9649	-548.937		90.3	-23.1202	-2444.34		90.3	-528.075	-1293.65		90.3	0.401678	-303.572		90.3	-45.2282	-5680.13		90.3	-126.103	-1491.57
90.4	0.294174	0.824829	0.800308	0.816849		90.4	-0.422836	-1.18127	1.22906	0.223311		90.4	-22.1446	-553.919		90.4	-23.7429	-2451.5		90.4	-527.452	-1294.9		90.4	-8.0056	-302.638		90.4	-43.3599	-5673.28		90.4	-126.415	-1494.06
90.5	-5.93344	-1.97736	1.42313	0.505539		90.5	-1.35713	-1.18121	-0.327476	-0.0881615		90.5	-23.0787	-557.344		90.5	-29.0364	-2449.63		90.5	-524.027	-1293.65		90.5	-9.25112	-304.194		90.5	-36.5095	-5664.88		90.5	-129.84	-1493.75
90.6	-4.68792	0.202576	0.489044	0.817001		90.6	3.6248	-3.67218	2.47532	0.534507		90.6	-23.0787	-556.722		90.6	-25.6112	-2440.91		90.6	-522.158	-1299.88		90.6	-3.02351	-304.194		90.6	-48.342	-5658.03		90.6	-134.822	-1495
90.7	-2.19687	0.514206	0.489105	0.194336		90.7	5.80434	-5.85178	1.23016	1.15718		90.7	-21.8332	-556.41		90.7	-24.0543	-2442.78		90.7	-519.356	-1297.7		90.7	-1.77799	-311.356		90.7	-58.3062	-5639.97		90.7	-135.133	-1500.29
90.8	0.294174	3.93965	-0.756363	3.30821		90.8	0.510712	-3.04929	-0.0149932	-0.711199		90.8	-22.7674	-565.44		90.8	-32.4616	-2444.96		90.8	-514.997	-1290.23		90.8	-0.843844	-309.488		90.8	-30.9047	-5650.86		90.8	-134.822	-1506.52
90.9	-2.19687	2.07161	1.42337	-0.116882		90.9	0.82196	0.375967	-0.0146255	0.534232		90.9	-22.7674	-561.704		90.9	-33.7071	-2448.7		90.9	-518.733	-1276.53		90.9	-6.4487	-309.488		90.9	-29.9705	-5643.7		90.9	-136.068	-1502.78
91	-1.88549	0.203583	0.800674	-1.36234		91	3.31285	-4.60605	-0.0142584	0.84552		91	-22.7674	-552.362		91	-34.6412	-2449.01		91	-521.847	-1278.09		91	-3.95765	-310.733		91	-33.7071	-5634.36		91	-134.822	-1505.27
91.1	-2.50825	1.76073	2.04625	2.6857		91.1	4.86961	-3.04908	0.92025	-0.711475		91.1	-22.7674	-540.841		91.1	-28.725	-2459.28		91.1	-521.847	-1290.85		91.1	-4.26903	-310.422		91.1	-35.8868	-5616.61		91.1	-133.888	-1502.47
91.2	-2.19687	0.826843	-0.133347	-0.116638		91.2	7.04913	-5.54006	0.609237	1.4681		91.2	-21.5218	-538.662		91.2	-26.5453	-2459.6		91.2	-519.979	-1285.25		91.2	-6.4487	-311.356		91.2	-34.0185	-5615.99		91.2	-135.445	-1500.91
91.3	-0.0172081	-0.729813	-0.444656	-1.67346		91.3	2.37828	-0.869284	0.298224	0.222484		91.3	-24.3243	-543.955		91.3	-26.234	-2462.09		91.3	-519.356	-1279.64		91.3	-3.95765	-303.572		91.3	-35.5754	-5611.32		91.3	-132.331	-1494.69
91.4	-1.57411	-0.106796	1.1123	1.12903		91.4	7.36021	-0.246456	-0.635551	-0.711751		91.4	-21.5218	-553.608		91.4	-26.5453	-2473.3		91.4	-513.44	-1272.17		91.4	-6.4487	-295.476		91.4	-37.4437	-5608.2		91.4	-137.313	-1496.56
91.5	0.916935	-1.0407	-0.75592	-0.116394		91.5	3.31212	0.687754	-0.635183	-1.95737		91.5	-19.0308	-550.805		91.5	-25.9226	-2474.85		91.5	-520.602	-1285.56		91.5	-9.25112	-293.296		91.5	-35.264	-5611.63		91.5	-133.577	-1494.69
91.6	1.5397	-0.106293	-0.444473	-0.116318		91.6	1.75508	-0.246321	-0.634816	0.533588		91.6	-22.1446	-554.231		91.6	-27.1681	-2460.22		91.6	-521.224	-1298.64		91.6	-1.46661	-300.769		91.6	-35.264	-5622.84		91.6	-132.642	-1498.73
91.7	3.40798	1.45087	1.73526	1.12929		91.7	3.31183	0.687889	-1.56859	0.533496		91.7	-22.1446	-566.063		91.7	-22.4974	-2450.88		91.7	-519.045	-1297.08		91.7	-5.20317	-303.883		91.7	-39.3119	-5625.95		91.7	-134.511	-1495.93
91.8	-0.328587	0.205597	1.11255	-0.427536		91.8	2.37755	-1.18033	-0.0113206	0.222023		91.8	-21.8332	-557.656		91.8	-23.7429	-2454.61		91.8	-525.272	-1297.7		91.8	-2.71213	-303.26		91.8	-48.6534	-5616.3		91.8	-138.247	-1497.49
91.9	-1.26273	-0.105545	-1.37843	-1.05022		91.9	3.00015	-1.18026	-0.0109534	0.221931		91.9	-20.5877	-558.59		91.9	-23.4315	-2465.82		91.9	-512.817	-1300.19		91.9	-7.07146	-310.111		91.9	-41.803	-5599.17		91.9	-135.756	-1494.38
92	3.40798	0.2061	-0.132843	0.195404		92	3.62277	-0.868813	-1.87887	0.22184		92	-25.5698	-553.919		92	-21.2519	-2468.94		92	-513.128	-1308.29		92	-7.07146	-311.045		92	-44.9168	-5601.04		92	-129.217	-1489.08
92.1	4.03074	1.14049	1.11273	-0.738663		92.1	0.50882	-0.868746	-0.63298	0.221748		92.1	-24.6356	-557.967		92.1	-22.8088	-2471.74		92.1	-514.685	-1314.52		92.1	-6.76008	-310.733		92.1	-41.1802	-5615.37		92.1	-131.708	-1487.53
92.2	1.5397	1.45213	-0.755493	0.506927		92.2	-0.736847	-1.49144	-2.18952	1.46718		92.2	-22.7674	-560.458		92.2	-19.0722	-2470.81		92.2	-512.506	-1309.54		92.2	-3.33489	-311.045		92.2	-39.0006	-5630.94		92.2	-131.085	-1480.67
92.3	4.6535	0.829605	-1.68958	-1.36127		92.3	0.197144	4.42486	-0.320865	-0.401197		92.3	-24.3243	-560.147		92.3	-20.6291	-2475.48		92.3	-511.883	-1306.11		92.3	-5.20317	-311.045		92.3	-38.6892	-5621.91		92.3	-131.708	-1484.72
92.4	5.58764	0.207108	1.11292	0.507095		92.4	2.68805	0.68836	-0.631878	0.844233		92.4	-21.8332	-552.051		92.4	-26.8567	-2475.48		92.4	-507.524	-1306.42		92.4	-6.13731	-315.093		92.4	-41.803	-5623.46		92.4	-134.822	-1486.28
92.5	0.916935	1.45288	-1.06668	0.195801		92.5	2.68791	-0.557093	-0.942892	0.844141		92.5	-21.8332	-548.003		92.5	-25.2998	-2463.95		92.5	-512.506	-1317.63		92.5	1.02444	-307.62		92.5	-38.6892	-5638.1		92.5	-131.085	-1482.23
92.6	1.85108	3.01004	-2.00076	0.818649		92.6	0.819473	2.86816	1.23714	1.15543		92.6	-23.7015	-547.38		92.6	-21.8746	-2463.64		92.6	-516.865	-1318.57		92.6	-0.532464	-310.733		92.6	-42.4258	-5625.95		92.6	-133.888	-1482.85
92.7	2.78522	0.830612	-1.37794	-0.738174		92.7	-2.60585	-0.245581	-0.00801563	2.08948		92.7	-25.8812	-540.219		92.7	-25.6112	-2466.76		92.7	-521.536	-1310.47		92.7	-3.64627	-314.159		92.7	-44.9168	-5596.37		92.7	-133.265	-1488.46
92.8	-3.13101	-0.726028	0.490402	-1.98361		92.8	-2.91739	-0.55689	1.23787	-0.401657		92.8	-23.7015	-540.53		92.8	-24.9884	-2459.6		92.8	-517.799	-1301.75		92.8	-4.89179	-314.47		92.8	-41.803	-5586.72		92.8	-133.265	-1494.69
92.9	-0.951347	4.2563	-1.37781	-0.426636		92.9	1.4418	-0.245445	0.3041	-1.33589		92.9	-18.7194	-539.907		92.9	-24.6771	-2446.52		92.9	-515.308	-1294.59		92.9	-8.62836	-310.733		92.9	-43.9827	-5589.83		92.9	-133.265	-1494.69
93	-3.44239	-0.102768	0.49054	0.507584		93	2.06441	-2.42504	-0.941055	0.22092		93	-20.8991	-542.71		93	-22.186	-2449.94		93	-523.404	-1293.03		93	-5.82593	-312.602		93	-39.0006	-5570.53		93	-135.445	-1493.75
93.1	1.22831	0.520248	1.73613	-1.04922		93.1	3.62117	-0.868073	-0.0065465	-0.0905523		93.1	-19.0308	-555.788		93.1	-19.0722	-2446.52		93.1	-523.715	-1287.74		93.1	-2.40075	-303.883		93.1	-34.9526	-5569.28		93.1	-132.642	-1495.93
93.2	2.78522	0.209122	-1.68901	-0.115005		93.2	3.9324	-3.04767	-2.18584	-0.0906439		93.2	-20.8991	-566.686		93.2	-17.2039	-2433.13		93.2	-525.584	-1288.67		93.2	-3.33489	-301.703		93.2	-38.0664	-5583.29		93.2	-135.133	-1507.14
93.3	1.22831	0.209366	-0.754807	-3.22874		93.3	4.24364	-1.80208	-0.628573	1.77755		93.3	-26.5039	-562.327		93.3	-18.4494	-2430.64		93.3	-523.404	-1290.23		93.3	-7.38284	-303.572		93.3	-34.6412	-5591.7		93.3	-133.888	-1505.59
93.4	-0.951347	-1.0359	-1.3775	0.196548		93.4	0.818314	-1.49063	-1.56235	2.40022		93.4	-23.7015	-557.033		93.4	-23.4315	-2443.72		93.4	-516.865	-1285.56		93.4	-6.76008	-299.212		93.4	-31.216	-5588.59		93.4	-131.397	-1502.47
93.5	3.0966	-1.34703	-0.131912	1.13075		93.5	-1.98427	1.00048	-0.00507736	1.1546		93.5	-20.5877	-551.428		93.5	-29.9705	-2441.85		93.5	-509.703	-1282.76		93.5	-7.69422	-298.901		93.5	-26.5453	-5579.87		93.5	-132.02	-1496.24
93.6	-0.328587	1.76703	0.802292	-0.426056		93.6	3.30907	1.93469	-0.627471	-2.58206		93.6	-22.456	-548.626		93.6	-28.725	-2429.08		93.6	-512.506	-1287.74		93.6	-7.07146	-296.099		93.6	-30.9047	-5587.03		93.6	-128.594	-1503.09
93.7	-3.75378	0.210373	-1.68871	-0.114594		93.7	1.12924	-0.244907	-1.56125	0.531657		93.7	-22.456	-544.889		93.7	-28.725	-2413.51		93.7	-514.374	-1297.08		93.7	-6.4487	-289.248		93.7	-33.3957	-5597.62		93.7	-128.594	-1512.75
93.8	-0.328587	-2.28041	-2.62277	-1.04866		93.8	5.79982	-0.867599	-1.87226	0.220184		93.8	-20.5877	-550.494		93.8	-29.6591	-2408.53		93.8	-513.44	-1304.55		93.8	-1.77799	-293.296		93.8	-38.0664	-5599.49		93.8	-127.972	-1521.78
93.9	1.22831	-1.65741	-1.68858	-2.60547		93.9	7.0452	3.80318	-1.87189	1.46562		93.9	-23.3901	-554.231		93.9	-33.3957	-2419.74		93.9	-521.224	-1308.91		93.9	-3.02351	-297.344		93.9	-34.9526	-5597.93		93.9	-122.99	-1520.22
94	2.78522	0.833893	-1.37714	-1.67125		94	-1.67361	-0.867466	-0.314622	2.08828		94	-24.6356	-546.758		94	-30.9047	-2429.39		94	-519.356	-1298.33		94	-3.95765	-300.769		94	-41.803	-5600.42		94	-122.678	-1522.09
94.1	2.16246	-2.59105	-1.06569	0.508484		94.1	-1.36238	-1.80154	-0.0028739	0.84267		94.1	-21.5218	-555.165		94.1	-34.9526	-2423.48		94.1	-519.667	-1307.04		94.1	-5.20317	-305.44		94.1	-44.6054	-5592.64		94.1	-127.038	-1517.11
94.2	2.78522	-0.411118	-1.99977	0.508575		94.2	4.24232	-2.11285	-1.55941	2.0881		94.2	-25.5698	-552.362		94.2	-31.8388	-2420.67		94.2	-525.895	-1299.57		94.2	-3.64627	-300.458		94.2	-45.2282	-5575.51		94.2	-131.708	-1515.55
94.3	1.85108	-0.72226	-2.93385	0.820038		94.3	0.505615	-3.66969	-0.31352	-0.0916557		94.3	-26.1925	-552.985		94.3	-29.9705	-2428.46		94.3	-531.811	-1293.34		94.3	-3.64627	-295.476		94.3	-48.9647	-5568.97		94.3	-131.397	-1521.78
94.4	2.47384	0.523529	-1.06551	-0.425415		94.4	-1.05144	-4.60376	-0.935914	2.08792		94.4	-25.8812	-552.051		94.4	-26.8567	-2417.87		94.4	-530.877	-1292.72		94.4	-6.76008	-288.937		94.4	-46.1623	-5567.41		94.4	-129.217	-1524.58
94.5	-1.26273	-0.098999	-3.24512	-1.35947		94.5	3.93051	-0.867128	-1.86969	-0.714601		94.5	-21.2104	-553.608		94.5	-25.2998	-2406.97		94.5	-517.176	-1299.57		94.5	-4.58041	-292.051		94.5	-53.3241	-5560.25		94.5	-130.151	-1527.07
94.6	0.916935	-0.721497	-1.68814	0.197525		94.6	3.3076	-3.04673	-1.55794	0.84221		94.6	-25.5698	-558.279		94.6	-22.186	-2401.99		94.6	-505.967	-1297.39		94.6	-5.82593	-298.59		94.6	-50.5216	-5543.13		94.6	-125.792	-1521.47
94.7	5.27626	-1.34401	-1.37669	2.37727		94.7	-4.16568	-1.48975	-1.24619	2.7104		94.7	-23.0787	-565.44		94.7	-21.8746	-2397.94		94.7	-503.164	-1297.08		94.7	-6.76008	-297.967		94.7	-49.2761	-5530.05		94.7	-128.283	-1521.47
94.8	4.34212	-1.03238	-1.99939	-1.04784		94.8	-0.740646	-3.66935	-2.80273	1.46479		94.8	-19.3422	-571.045		94.8	-21.2519	-2389.53		94.8	-512.194	-1298.33		94.8	-5.20317	-292.362		94.8	-46.1623	-5541.26		94.8	-127.972	-1526.14
94.9	2.47384	0.836151	-1.06519	-1.67052		94.9	2.06163	-1.17824	-2.49098	0.530553		94.9	-22.1446	-566.063		94.9	-15.3356	-2393.89		94.9	-517.176	-1296.15		94.9	-7.38284	-290.805		94.9	-40.2461	-5541.26		94.9	-130.774	-1517.11
95	0.916935	0.213638	-1.99927	-0.736282		95	-1.67506	-1.48955	-2.49061	1.15322		95	-22.1446	-555.165		95	-13.4674	-2406.35		95	-517.176	-1309.85		95	-5.51455	-281.464		95	-33.3957	-5541.26		95	-130.774	-1518.35
95.1	-4.9993	-1.65439	-1.99921	-1.98174		95.1	-5.41179	-1.80087	-3.73577	1.15313		95.1	-22.456	-552.985		95.1	-15.3356	-2415.69		95.1	-515.308	-1317.01		95.1	-5.20317	-272.122		95.1	-28.725	-5551.84		95.1	-128.906	-1528.94
95.2	-0.639969	-0.408615	-2.31053	2.06628		95.2	0.504303	-1.17804	-3.11264	3.3327		95.2	-20.5877	-544.889		95.2	-20.6291	-2415.38		95.2	-514.685	-1315.45		95.2	-3.33489	-275.859		95.2	-38.6892	-5550.29		95.2	-133.888	-1529.25
95.3	1.5397	-1.65388	-0.130798	-2.29295		95.3	-2.60965	-1.80073	-3.73503	1.46433		95.3	-20.5877	-540.841		95.3	-17.2039	-2425.97		95.3	-519.979	-1317.32		95.3	-2.71213	-282.398		95.3	-40.2461	-5543.75		95.3	-131.085	-1513.99
95.4	-0.0172081	-1.03088	-0.75351	0.198181		95.4	-5.7236	-0.243761	-2.80053	1.46424		95.4	-17.4739	-543.644		95.4	-20.0063	-2424.1		95.4	-520.29	-1312.96		95.4	-3.02351	-284.577		95.4	-39.0006	-5548.42		95.4	-128.594	-1515.24
95.5	-2.19687	-0.407852	-4.49001	0.509628		95.5	-9.14894	-3.04612	-3.11154	0.218621		95.5	-19.9649	-541.775		95.5	-25.2998	-2423.16		95.5	-523.093	-1304.24		95.5	-3.64627	-273.991		95.5	-37.1323	-5579.87		95.5	-128.906	-1513.06
95.6	-4.06516	0.526535	-1.68753	-0.113037		95.6	-3.85561	-6.47124	1.87092	2.08681		95.6	-20.2763	-538.35		95.6	-23.7429	-2422.54		95.6	-519.045	-1298.95		95.6	-4.89179	-278.973		95.6	-36.8209	-5579.56		95.6	-129.84	-1512.75
95.7	0.294174	0.838165	-1.0647	-0.424347		95.7	-1.98747	-2.11184	1.24852	2.08672		95.7	-19.3422	-554.231		95.7	-25.6112	-2418.18		95.7	-512.194	-1304.55		95.7	-2.40075	-280.841		95.7	-43.9827	-5587.65		95.7	-131.085	-1517.11
95.8	1.5397	2.08394	-0.130493	-0.112869		95.8	-6.03557	-4.9142	-0.308012	1.77525		95.8	-20.2763	-560.458		95.8	-29.3478	-2408.84		95.8	-513.751	-1332.58		95.8	-5.82593	-277.104		95.8	-39.3119	-5562.74		95.8	-132.954	-1514.3
95.9	-0.328587	0.215912	-1.37596	-0.112793		95.9	-3.54466	-0.554804	-1.86455	2.08654		95.9	-21.8332	-547.692		95.9	-34.0185	-2399.81		95.9	-508.458	-1317.94		95.9	-6.13731	-275.547		95.9	-45.5396	-5542.5		95.9	-132.642	-1509.01
96	-1.57411	-1.65213	-1.06451	-2.60376		96	0.814514	3.18183	-2.48694	0.529542		96	-22.7674	-544.266		96	-28.725	-2398.88		96	-514.374	-1312.96		96	-2.71213	-282.086		96	-42.4258	-5540.32		96	-130.463	-1513.37
96.1	-0.951347	-2.89738	-1.37584	1.13289		96.1	1.74852	-1.48881	2.49552	2.08635		96.1	-19.6535	-545.512		96.1	-30.5933	-2398.25		96.1	-517.799	-1310.47		96.1	-6.13731	-278.35		96.1	-43.3599	-5546.55		96.1	-131.708	-1510.26
96.2	0.916935	0.21666	-1.99852	-0.112549		96.2	2.37112	-3.04565	1.25036	3.33178		96.2	-20.2763	-540.841		96.2	-29.6591	-2399.5		96.2	-514.997	-1302.68		96.2	-6.4487	-282.398		96.2	-40.5575	-5545.31		96.2	-135.133	-1514.3
96.3	-3.13101	-1.02861	0.492584	-0.423859		96.3	3.92789	-0.243155	-2.17446	2.08617		96.3	-18.0966	-534.614		96.3	-34.3299	-2399.81		96.3	-519.356	-1298.01		96.3	-7.07146	-283.332		96.3	-35.8868	-5552.78		96.3	-129.529	-1514.93
96.4	-1.88549	-1.02837	-1.9984	-2.91481		96.4	4.23912	-0.865849	-2.17409	0.840555		96.4	-22.7674	-531.811		96.4	-36.5095	-2396.39		96.4	-509.08	-1316.7		96.4	-6.13731	-281.152		96.4	-37.4437	-5540.32		96.4	-128.283	-1512.12
96.5	-0.0172081	-1.96225	-1.68697	1.13321		96.5	0.502411	-1.17716	-2.17372	3.33151		96.5	-17.4739	-531.188		96.5	-34.6412	-2400.74		96.5	-506.278	-1331.95		96.5	-4.89179	-281.152		96.5	-36.8209	-5545.62		96.5	-128.594	-1510.26
96.6	2.47384	-1.65062	-1.6869	-0.423599		96.6	3.61606	-0.865713	0.00630713	2.08589		96.6	-20.8991	-542.71		96.6	-37.1323	-2400.74		96.6	-506.278	-1307.67		96.6	-9.87388	-277.416		96.6	-36.5095	-5539.39		96.6	-131.708	-1511.81
96.7	3.40798	-0.404831	-1.99821	-1.35767		96.7	1.74763	0.0684948	-2.17299	1.46304		96.7	-22.456	-539.284		96.7	-35.5754	-2394.83		96.7	-500.673	-1302.06		96.7	-5.82593	-275.859		96.7	-39.0006	-5522.26		96.7	-135.445	-1516.48
96.8	-1.26273	-3.82977	-1.3754	-0.112061		96.8	2.99301	-0.554197	-1.86124	-0.0939546		96.8	-23.3901	-536.793		96.8	-34.9526	-2389.53		96.8	-500.673	-1300.51		96.8	-2.71213	-273.991		96.8	-36.8209	-5514.48		96.8	-129.84	-1508.7
96.9	1.22831	1.46396	-0.441193	-0.734726		96.9	2.05872	-0.554129	-4.6633	3.33114		96.9	-22.7674	-532.434		96.9	-27.1681	-2392.65		96.9	-507.524	-1296.15		96.9	-6.76008	-277.727		96.9	-40.2461	-5501.71		96.9	-129.529	-1513.06
97	5.27626	-0.715469	-1.99803	0.510864		97	0.501678	-3.66787	-3.10603	4.26519		97	-20.5877	-538.973		97	-27.4795	-2384.24		97	-512.817	-1281.51		97	-6.4487	-280.218		97	-39.0006	-5507.94		97	-129.217	-1509.94
97.1	3.71936	-1.96074	1.7386	0.822327		97.1	-0.121231	-3.35642	-2.17152	2.08543		97.1	-24.3243	-545.512		97.1	-26.5453	-2380.19		97.1	-511.26	-1279.02		97.1	-4.26903	-281.152		97.1	-37.4437	-5491.44		97.1	-128.594	-1506.21
97.2	9.94697	0.530563	-2.62067	-1.66862		97.2	-1.98965	-2.11083	-3.41668	3.01948		97.2	-19.9649	-553.608		97.2	-31.8388	-2376.15		97.2	-502.23	-1295.52		97.2	-3.95765	-283.332		97.2	-33.7071	-5486.77		97.2	-130.774	-1505.9
97.3	6.2104	-2.58299	-1.99785	-2.29132		97.3	2.05814	-1.488	0.943019	4.88768		97.3	-25.8812	-549.56		97.3	-32.1502	-2392.03		97.3	-496.002	-1294.59		97.3	-4.26903	-275.859		97.3	-40.5575	-5494.55		97.3	-133.888	-1503.09
97.4	4.34212	0.219681	1.4274	-1.04572		97.4	-0.744446	-2.1107	0.00924492	2.39654		97.4	-23.3901	-548.937		97.4	-40.5575	-2396.7		97.4	-494.134	-1283.69		97.4	-2.08937	-273.056		97.4	-44.6054	-5492.37		97.4	-131.085	-1495
97.5	3.71936	-0.714203	-1.06358	-3.2253		97.5	0.500946	0.0690327	0.632373	2.39645		97.5	-19.9649	-543.021		97.5	-53.6355	-2397.94		97.5	-498.805	-1298.33		97.5	-3.33489	-280.53		97.5	-44.294	-5486.46		97.5	-130.774	-1493.44
97.6	3.0966	-1.95949	-1.06352	0.822739		97.6	4.86012	0.380482	0.944121	3.95326		97.6	-22.456	-538.35		97.6	-21.5632	-2395.14		97.6	-498.182	-1302.06		97.6	-6.13731	-290.494		97.6	-47.7192	-5486.77		97.6	-132.02	-1494.06
97.7	2.78522	-1.64784	-0.129318	-1.35684		97.7	3.61446	1.31469	-1.54656	2.70764		97.7	-19.9649	-541.775		97.7	-34.0185	-2387.36		97.7	-504.098	-1302.68		97.7	-6.13731	-292.985		97.7	-44.6054	-5477.11		97.7	-133.577	-1496.56
97.8	3.40798	-2.58174	-1.68617	-0.111237		97.8	1.74603	1.31476	-1.54619	3.64169		97.8	-23.0787	-552.985		97.8	-34.0185	-2385.49		97.8	-507.524	-1301.13		97.8	-5.82593	-294.853		97.8	-42.4258	-5464.66		97.8	-125.481	-1489.39
97.9	5.89902	-1.33595	-0.751953	0.511597		97.9	-4.48172	0.692066	-2.47996	3.6416		97.9	-23.3901	-567.62		97.9	-38.3778	-2383.93		97.9	-499.116	-1302.37		97.9	-10.1853	-293.296		97.9	-45.5396	-5483.65		97.9	-129.217	-1481.3
98	2.78522	1.15533	0.805023	-1.97935		98	-0.433929	-1.79891	-3.41374	4.88703		98	-21.8332	-564.195		98	-41.1802	-2391.71		98	-496.002	-1295.83		98	-15.4787	-291.739		98	-48.6534	-5485.52		98	-132.954	-1482.23
98.1	-1.26273	1.77835	-0.751831	-0.733749		98.1	-1.99097	-1.48746	-0.922326	2.3959		98.1	-22.456	-566.997		98.1	-42.4258	-2395.14		98.1	-496.002	-1290.23		98.1	-17.0356	-290.494		98.1	-47.0965	-5456.87		98.1	-131.397	-1484.41
98.2	2.16246	-1.33521	-1.37453	-0.110916		98.2	-6.66183	-0.553253	-0.921958	3.64133		98.2	-21.8332	-565.752		98.2	-38.3778	-2392.34		98.2	-494.446	-1306.11		98.2	-11.7422	-290.494		98.2	-45.2282	-5456.25		98.2	-132.02	-1486.28
98.3	-0.0172081	-2.26909	-1.99722	0.200562		98.3	-9.15303	1.3151	0.0125504	1.15019		98.3	-22.7674	-554.853		98.3	-36.5095	-2391.71		98.3	-491.955	-1307.04		98.3	-18.5925	-282.398		98.3	-36.5095	-5483.34		98.3	-130.774	-1486.9
98.4	2.16246	-3.20299	-0.751648	0.200638		98.4	-5.72798	-2.73278	-1.54399	-0.718187		98.4	-21.2104	-550.494		98.4	-30.5933	-2397.94		98.4	-500.673	-1300.19		98.4	-13.9218	-278.038		98.4	-35.264	-5492.37		98.4	-127.038	-1500.6
98.5	-0.639969	-0.0889282	0.805328	-0.110657		98.5	-2.30295	-2.10995	-1.855	0.838624		98.5	-21.8332	-542.398		98.5	-34.3299	-2384.86		98.5	-497.559	-1301.75		98.5	-12.6763	-283.332		98.5	-40.2461	-5489.88		98.5	-129.84	-1495.93
98.6	-0.328587	-1.64558	-1.99704	0.512177		98.6	-3.5486	2.8722	-3.41153	1.77267		98.6	-19.9649	-548.937		98.6	-29.6591	-2383		98.6	-498.805	-1304.86		98.6	-10.1853	-291.116		98.6	-41.1802	-5487.7		98.6	-125.169	-1490.33
98.7	-1.88549	0.845718	1.42821	0.200882		98.7	-4.79428	-1.79844	-3.72255	2.70672		98.7	-19.9649	-548.937		98.7	-31.5274	-2383		98.7	-498.182	-1303.62		98.7	-8.31698	-292.985		98.7	-44.294	-5505.14		98.7	-124.858	-1482.85
98.8	-1.88549	-2.57922	-1.06277	-1.04456		98.8	-1.6806	-0.552849	-2.16528	3.32939		98.8	-20.8991	-556.099		98.8	-34.0185	-2385.8		98.8	-491.955	-1296.77		98.8	-7.07146	-296.099		98.8	-35.8868	-5511.99		98.8	-127.038	-1487.84
98.9	0.294174	-3.82448	2.05109	-1.66724		98.9	-2.6149	1.3155	0.326135	0.526875		98.9	-19.6535	-559.524		98.9	-27.1681	-2389.22		98.9	-485.104	-1292.41		98.9	-4.26903	-296.41		98.9	-32.773	-5497.66		98.9	-126.103	-1494.69
99	0.916935	1.46924	-0.439896	0.201126		99	-2.61504	0.0700436	0.949263	-0.0959773		99	-22.456	-555.476		99	-27.1681	-2390.16		99	-499.116	-1295.83		99	-4.89179	-290.805		99	-35.8868	-5490.5		99	-126.726	-1501.85
99.1	-3.44239	0.846725	-0.128448	-1.04431		99.1	-1.68105	-0.864029	-1.8528	0.838072		99.1	-21.5218	-552.674		99.1	-32.4616	-2382.37		99.1	-496.002	-1302.68		99.1	-5.82593	-285.512		99.1	-39.3119	-5483.96		99.1	-124.858	-1491.26
99.2	-2.19687	-0.70993	0.805756	-1.35562		99.2	-1.05844	-0.55258	-0.606906	3.32903		99.2	-19.3422	-552.051		99.2	-29.9705	-2378.64		99.2	-489.463	-1296.46		99.2	-6.4487	-287.691		99.2	-40.8688	-5482.1		99.2	-128.283	-1485.97
99.3	1.22831	-1.33243	-1.06247	1.75827		99.3	-2.30411	-0.241135	-1.2293	3.64031		99.3	-19.0308	-552.985		99.3	-35.264	-2391.09		99.3	-491.02	-1296.46		99.3	-12.0535	-288.314		99.3	-42.4258	-5484.9		99.3	-130.774	-1484.72
99.4	-1.26273	-0.709427	-0.439651	0.824219		99.4	-3.86116	2.24998	-0.917552	1.77194		99.4	-19.0308	-547.38		99.4	-34.9526	-2392.96		99.4	-487.595	-1293.34		99.4	-11.7422	-287.38		99.4	-39.6233	-5485.21		99.4	-132.02	-1489.7
99.5	-5.93344	0.224976	1.42871	0.824295		99.5	-2.3044	3.49557	-0.917184	2.08323		99.5	-17.4739	-543.021		99.5	-29.9705	-2396.39		99.5	-480.433	-1280.58		99.5	-18.2812	-282.709		99.5	-41.803	-5474.62		99.5	-137.002	-1488.15
99.6	0.605553	-3.19997	-0.7509	-0.109756		99.6	-1.68178	3.18425	-3.71924	4.57418		99.6	-18.0966	-553.919		99.6	-31.8388	-2392.34		99.6	-479.811	-1292.41		99.6	-13.6104	-281.152		99.6	-41.803	-5459.99		99.6	-132.02	-1486.28
99.7	0.916935	-0.397278	-1.68498	1.13583		99.7	-0.747787	2.25018	-1.53921	2.7058		99.7	-17.4739	-552.051		99.7	-30.5933	-2386.42		99.7	-477.631	-1289.3		99.7	-14.2332	-289.56		99.7	-42.4258	-5439.12		99.7	-136.068	-1489.08
99.8	0.916935	-2.57671	-0.750778	1.4473		99.8	-2.61621	1.62749	-1.22746	3.01709		99.8	-13.7373	-545.201		99.8	-27.1681	-2385.49		99.8	-484.793	-1286.8		99.8	-13.9218	-286.757		99.8	-49.5875	-5442.24		99.8	-136.379	-1478.81
99.9	-5.31068	-2.57645	-0.439331	-2.60056		99.9	0.186066	0.38203	-0.915716	4.5739		99.9	-18.0966	-540.53		99.9	-29.0364	-2386.11		99.9	-483.547	-1286.49		99.9	-11.1194	-278.35		99.9	-49.2761	-5442.55		99.9	-137.624	-1480.05
100	-4.37654	-0.39653	0.183487	2.69299		100	-1.0596	1.00486	-0.603968	0.525864		100	-20.8991	-537.416		100	-29.6591	-2387.98		100	-481.99	-1291.48		100	-13.9218	-282.398		100	-44.9168	-5434.14		100	-132.331	-1489.08
100.1	0.605553	-1.33041	-0.439209	1.13615		100.1	4.54509	1.62769	-1.84912	-0.719751		100.1	-18.408	-541.153		100.1	-32.4616	-2383.62		100.1	-488.529	-1288.36		100.1	-10.808	-287.069		100.1	-43.6713	-5435.39		100.1	-129.217	-1488.46
100.2	-2.19687	-0.707413	-0.439148	-1.97755		100.2	9.52705	0.693615	-1.22599	3.32811		100.2	-13.7373	-542.71		100.2	-35.5754	-2379.57		100.2	-484.481	-1285.25		100.2	-14.2332	-286.446		100.2	-50.5216	-5444.42		100.2	-135.445	-1478.81
100.3	-5.31068	-2.26405	-1.99599	0.824951		100.3	4.85619	1.00506	-1.84839	2.70525		100.3	-14.6715	-547.692		100.3	-36.1981	-2381.75		100.3	-478.877	-1274.66		100.3	-15.4787	-294.853		100.3	-54.2582	-5446.6		100.3	-134.511	-1483.17
100.4	-6.24482	-5.06624	2.98616	-1.35463		100.4	6.72433	1.62789	-0.602499	3.32792		100.4	-13.1146	-553.919		100.4	-39.9347	-2381.75		100.4	-481.056	-1283.38		100.4	-12.3649	-296.41		100.4	-48.342	-5444.73		100.4	-133.577	-1485.35
100.5	-4.68792	-1.95218	-0.750351	0.825119		100.5	7.34694	1.93934	-1.53627	2.39369		100.5	-12.4918	-548.314		100.5	-37.4437	-2389.85		100.5	-484.793	-1286.8		100.5	-15.1674	-290.494		100.5	-45.2282	-5438.19		100.5	-132.02	-1473.51
100.6	-7.80172	-1.95193	-1.06166	0.513809		100.6	8.59232	0.0711212	-0.913145	2.08222		100.6	-12.8032	-538.662		100.6	-36.5095	-2386.42		100.6	-485.416	-1279.33		100.6	-8.93974	-297.033		100.6	-37.755	-5425.11		100.6	-130.463	-1471.33
100.7	-5.31068	-0.0833893	-1.0616	0.20253		100.7	4.23285	1.62809	-2.78106	1.77074		100.7	-15.917	-532.123		100.7	-37.4437	-2387.04		100.7	-485.727	-1288.36		100.7	-11.1194	-294.853		100.7	-38.6892	-5427.92		100.7	-134.511	-1472.58
100.8	-2.50825	-1.32866	-0.438782	-0.10878		100.8	2.6758	0.382637	-0.91241	2.08203		100.8	-13.4259	-541.153		100.8	-30.5933	-2385.18		100.8	-479.811	-1275.59		100.8	-11.7422	-290.805		100.8	-41.803	-5427.92		100.8	-129.529	-1480.67
100.9	-0.328587	-1.63979	-2.30701	1.4482		100.9	2.67566	-0.862818	1.26762	3.63884		100.9	-10.0007	-543.955		100.9	-26.5453	-2386.73		100.9	-482.302	-1274.97		100.9	-13.2991	-289.871		100.9	-33.3957	-5417.64		100.9	-127.66	-1486.28
101	-1.26273	-0.705399	1.42963	1.1369		101	0.495834	-0.862749	-1.22306	2.70461		101	-11.869	-548.626		101	-26.234	-2383.62		101	-480.745	-1277.15		101	-14.2332	-285.2		101	-30.5933	-5393.66		101	-128.906	-1496.56
101.1	-6.5562	-1.01654	1.74107	1.13698		101.1	-3.24088	1.62836	0.334214	0.524852		101.1	-12.8032	-552.362		101.1	-28.4136	-2376.46		101.1	-484.17	-1271.86		101.1	-11.1194	-285.512		101.1	-35.264	-5407.05		101.1	-131.397	-1495
101.2	-5.31068	-3.19594	0.495621	1.44844		101.2	2.05244	3.80809	-0.599561	2.70442		101.2	-13.1146	-549.871		101.2	-27.4795	-2365.56		101.2	-484.17	-1290.85		101.2	-8.62836	-285.2		101.2	-35.5754	-5399.58		101.2	-130.463	-1480.67
101.3	-7.80172	-1.01604	1.42982	-0.108368		101.3	7.34578	1.00574	0.334949	2.08157		101.3	-11.2463	-548.003		101.3	-29.0364	-2374.28		101.3	-484.481	-1303		101.3	-7.07146	-286.134		101.3	-41.4916	-5401.45		101.3	-132.331	-1484.72
101.4	-5.93344	-0.0816345	-0.127014	0.203094		101.4	7.03426	-1.17386	-0.910207	3.94976		101.4	-13.1146	-538.039		101.4	-29.9705	-2380.5		101.4	-488.841	-1299.57		101.4	-11.4308	-284.266		101.4	-36.8209	-5387.75		101.4	-134.511	-1484.41
101.5	-0.639969	-2.8838	1.11856	1.76009		101.5	3.29755	-0.239653	0.335683	4.57243		101.5	-13.1146	-541.464		101.5	-26.8567	-2382.37		101.5	-492.266	-1296.15		101.5	-9.87388	-289.871		101.5	-33.3957	-5393.35		101.5	-134.199	-1487.21
101.6	1.85108	-2.26079	1.74139	0.514633		101.6	0.183578	1.00594	-0.909472	0.835773		101.6	-13.4259	-542.087		101.6	-28.4136	-2392.96		101.6	-486.35	-1299.26		101.6	-15.1674	-284.889		101.6	-35.264	-5425.74		101.6	-136.69	-1486.59
101.7	-0.328587	0.853256	-1.68375	1.76024		101.7	3.29724	0.694626	0.336417	2.0812		101.7	-14.0487	-543.021		101.7	-33.7071	-2399.81		101.7	-485.727	-1297.7		101.7	-14.2332	-286.757		101.7	-34.6412	-5427.29		101.7	-133.265	-1488.46
101.8	-0.0172081	-1.32614	-0.438156	0.826187		101.8	2.98572	-2.73049	1.27093	1.45835		101.8	-13.7373	-546.135		101.8	-30.9047	-2397.01		101.8	-487.907	-1276.84		101.8	-12.3649	-289.248		101.8	-32.1502	-5407.68		101.8	-135.133	-1489.08
101.9	-1.88549	-0.70314	1.74158	0.514877		101.9	1.42867	-2.10766	0.0257711	-0.0986443		101.9	-9.37799	-547.38		101.9	-28.725	-2396.7		101.9	-481.368	-1277.15		101.9	-10.4966	-288.937		101.9	-32.773	-5433.83		101.9	-129.84	-1488.77
102	-0.0172081	-0.391495	1.74164	-0.107803		102	2.67406	-1.17346	0.6489	-1.03288		102	-11.869	-540.841		102	-28.1022	-2384.86		102	-480.433	-1285.87		102	-8.93974	-288.937		102	-34.6412	-5447.84		102	-135.133	-1493.44
102.1	-0.951347	-1.32539	-1.37212	3.62886		102.1	4.2308	-3.97582	1.58341	0.212553		102.1	-11.5577	-529.943		102.1	-29.9705	-2383		102.1	-477.008	-1276.22		102.1	-6.4487	-289.56		102.1	-32.1502	-5443.8		102.1	-130.774	-1494.06
102.2	2.16246	1.47729	2.36452	2.38341		102.2	3.91928	0.0721989	-0.595889	2.39213		102.2	-11.5577	-529.632		102.2	-30.9047	-2394.52		102.2	-474.829	-1274.04		102.2	-5.20317	-296.099		102.2	-33.3957	-5439.75		102.2	-130.774	-1495.93
102.3	1.22831	-1.01352	-0.749237	1.13795		102.3	-0.440201	0.69503	1.27276	1.45789		102.3	-11.869	-530.877		102.3	-29.0364	-2399.19		102.3	-478.254	-1268.74		102.3	-6.13731	-296.721		102.3	-35.8868	-5445.98		102.3	-127.972	-1480.36
102.4	3.40798	-0.0791168	2.05325	-0.418854		102.4	-0.440338	-3.35285	0.961749	3.63746		102.4	-8.13246	-535.236		102.4	-26.234	-2402.61		102.4	-488.218	-1263.14		102.4	-6.4487	-296.099		102.4	-37.4437	-5435.7		102.4	-131.085	-1475.07
102.5	2.16246	0.232513	0.496414	2.07227		102.5	-0.129105	-1.17312	0.650736	0.523565		102.5	-10.3121	-538.973		102.5	-34.0185	-2410.71		102.5	-481.679	-1266.56		102.5	-8.31698	-299.212		102.5	-34.3299	-5410.48		102.5	-128.283	-1467.29
102.6	-3.75378	-4.12656	2.36476	3.0065		102.6	4.85283	-0.238911	0.651103	2.70314		102.6	-12.4918	-539.907		102.6	-34.3299	-2411.33		102.6	-486.972	-1268.43		102.6	-8.93974	-296.099		102.6	-34.6412	-5407.99		102.6	-127.66	-1474.14
102.7	-5.62206	-1.01251	3.61034	2.38382		102.7	-0.129395	1.94082	0.34009	0.212001		102.7	-10.6235	-549.56		102.7	-34.6412	-2411.95		102.7	-486.972	-1276.53		102.7	-8.0056	-292.985		102.7	-34.3299	-5387.44		102.7	-126.415	-1483.48
102.8	-3.13101	0.856033	1.11935	1.44975		102.8	-1.06369	2.87503	-1.21645	1.45743		102.8	-11.5577	-549.871		102.8	-29.3478	-2409.77		102.8	-485.727	-1285.87		102.8	-6.4487	-288.625		102.8	-34.6412	-5407.05		102.8	-126.103	-1486.28
102.9	-2.81963	-1.94615	0.496674	1.44984		102.9	-0.752457	-0.238708	1.27497	4.25976		102.9	-16.2284	-542.71		102.9	-30.5933	-2404.17		102.9	-487.907	-1271.55		102.9	-8.31698	-294.23		102.9	-32.4616	-5403.94		102.9	-123.924	-1485.03
103	2.78522	-0.388977	0.185349	2.07268		103	0.181534	-2.41831	0.341191	1.14587		103	-14.0487	-546.758		103	-32.1502	-2396.39		103	-486.972	-1269.68		103	-5.51455	-294.542		103	-32.1502	-5400.83		103	-127.66	-1494.06
103.1	-0.0172081	-0.388733	2.36508	1.13861		103.1	-1.68687	-2.41824	-1.83811	3.63682		103.1	-15.6056	-544.578		103.1	-34.9526	-2393.58		103.1	-485.727	-1257.53		103.1	-6.76008	-297.967		103.1	-39.6233	-5413.9		103.1	-130.463	-1506.52
103.2	4.96488	1.16843	0.808243	2.07285		103.2	-0.752899	-1.48403	1.58745	2.70259		103.2	-14.3601	-544.889		103.2	-37.755	-2392.96		103.2	-481.368	-1262.52		103.2	-4.58041	-291.428		103.2	-43.3599	-5417.64		103.2	-132.331	-1512.12
103.3	9.01283	-0.388229	0.185532	1.76155		103.3	-1.37579	-0.8612	1.8992	0.211449		103.3	-9.37799	-543.955		103.3	-40.8688	-2393.27		103.3	-470.781	-1267.19		103.3	-2.71213	-285.512		103.3	-45.8509	-5428.23		103.3	-133.265	-1513.37
103.4	7.45593	1.79169	2.36526	1.13887		103.4	-5.73528	-1.79528	1.2768	0.522738		103.4	-10.3121	-541.775		103.4	-35.8868	-2385.8		103.4	-470.781	-1279.64		103.4	-3.95765	-280.841		103.4	-43.9827	-5416.08		103.4	-130.463	-1509.01
103.5	1.22831	0.857788	2.98808	2.07309		103.5	-4.4899	-2.41797	1.27717	1.76817		103.5	-11.5577	-543.955		103.5	-34.6412	-2395.76		103.5	-472.338	-1289.61		103.5	-3.95765	-272.434		103.5	-40.2461	-5407.68		103.5	-130.774	-1502.16
103.6	1.5397	0.235291	-0.437042	0.516266		103.6	-0.753479	-5.84309	1.58892	3.32498		103.6	-11.5577	-536.171		103.6	-34.0185	-2401.99		103.6	-474.517	-1274.97		103.6	-3.02351	-275.547		103.6	-45.2282	-5399.89		103.6	-129.217	-1499.98
103.7	3.71936	2.10382	2.67682	1.13911		103.7	-1.37639	-2.41784	2.21205	1.14522		103.7	-12.8032	-525.895		103.7	-34.3299	-2401.99		103.7	-477.008	-1266.56		103.7	-7.69422	-278.973		103.7	-48.6534	-5399.89		103.7	-130.151	-1509.63
103.8	3.0966	-1.63249	1.74275	2.38472		103.8	-2.93343	-1.79501	0.96689	1.45651		103.8	-13.7373	-520.29		103.8	-33.3957	-2393.89		103.8	-477.942	-1274.04		103.8	-2.71213	-280.53		103.8	-49.2761	-5387.44		103.8	-127.972	-1498.11
103.9	3.71936	-0.0753479	1.43143	0.51651		103.9	-0.753922	-7.39979	1.27864	1.45642		103.9	-13.1146	-516.242		103.9	-37.4437	-2393.27		103.9	-486.038	-1269.68		103.9	-8.31698	-293.608		103.9	-48.9647	-5364.08		103.9	-132.02	-1487.21
104	0.294174	0.236298	2.05424	1.76213		104	-6.3589	-5.22006	-0.589278	1.14495		104	-12.1804	-517.799		104	-34.0185	-2392.34		104	-485.104	-1268.74		104	-7.69422	-284.266		104	-51.1444	-5362.84		104	-129.529	-1489.7
104.1	2.47384	1.48207	2.36569	1.13943		104.1	-9.47285	-6.15413	-0.588911	2.079		104.1	-10.0007	-521.224		104.1	-33.3957	-2393.58		104.1	-484.481	-1279.95		104.1	-2.08937	-279.595		104.1	-45.8509	-5371.24		104.1	-132.954	-1489.7
104.2	-2.50825	-0.385956	0.497467	3.0078		104.2	-4.80231	-3.04026	2.21388	2.39029		104.2	-10.0007	-520.913		104.2	-38.3778	-2395.76		104.2	-486.038	-1271.55		104.2	-5.51455	-282.709		104.2	-38.0664	-5372.49		104.2	-127.038	-1489.39
104.3	-2.50825	0.548431	2.05443	1.45099		104.3	-3.55692	-1.48329	3.77115	0.210529		104.3	-13.7373	-525.584		104.3	-35.5754	-2387.98		104.3	-485.104	-1272.17		104.3	-7.69422	-281.152		104.3	-39.6233	-5367.51		104.3	-129.84	-1488.46
104.4	-0.0172081	-0.696838	2.67725	4.56487		104.4	-2.62292	-4.59703	-1.21057	1.76734		104.4	-11.2463	-529.32		104.4	-35.264	-2381.44		104.4	-476.385	-1275.28		104.4	-3.02351	-277.727		104.4	-45.2282	-5362.21		104.4	-129.217	-1488.46
104.5	-2.19687	-1.63074	1.43181	3.00806		104.5	2.04764	-0.860392	0.658081	3.01277		104.5	-11.869	-529.009		104.5	-30.9047	-2379.57		104.5	-471.403	-1270.3		104.5	-3.02351	-278.973		104.5	-46.1623	-5343.53		104.5	-128.594	-1488.77
104.6	-5.93344	0.860565	-1.37056	-0.105667		104.6	5.47267	0.385197	0.658448	-1.34665		104.6	-12.4918	-530.254		104.6	-29.9705	-2380.19		104.6	-474.206	-1264.07		104.6	-6.13731	-279.907		104.6	-45.8509	-5328.27		104.6	-126.726	-1490.02
104.7	-4.9993	2.10634	-0.436356	2.69684		104.7	2.35873	-1.48302	1.90434	-0.412599		104.7	-13.1146	-528.386		104.7	-34.0185	-2373.97		104.7	-477.008	-1260.03		104.7	-2.08937	-280.841		104.7	-55.5037	-5324.85		104.7	-123.612	-1478.81
104.8	-6.24482	0.861069	2.98889	1.76279		104.8	0.801682	0.385332	2.52747	2.38973		104.8	-11.869	-529.632		104.8	-35.264	-2370.23		104.8	-479.499	-1268.12		104.8	-5.20317	-280.218		104.8	-50.833	-5331.08		104.8	-128.283	-1477.56
104.9	-2.19687	1.79546	5.16862	3.63115		104.9	-2.00089	-1.79427	3.46198	0.209978		104.9	-11.5577	-530.877		104.9	-32.773	-2348.12		104.9	-481.368	-1268.74		104.9	-6.13731	-277.727		104.9	-51.1444	-5344.15		104.9	-125.169	-1476.63
105	2.16246	-0.383942	3.92316	3.00845		105	-2.31242	-4.28524	2.21682	0.832647		105	-13.7373	-525.272		105	-32.1502	-2351.86		105	-480.433	-1267.81		105	-3.02351	-283.332		105	-56.1265	-5350.07		105	-124.235	-1478.81
105.1	3.40798	0.861816	2.67769	2.38579		105.1	-1.6898	-2.72827	3.15133	-1.34711		105.1	-14.3601	-516.865		105.1	-27.1681	-2354.04		105.1	-473.272	-1253.8		105.1	-1.46661	-287.069		105.1	-55.5037	-5354.43		105.1	-125.792	-1481.61
105.2	-0.951347	1.48485	-0.124664	2.38586		105.2	-1.37857	-6.15339	3.46308	1.14384		105.2	-11.5577	-513.751		105.2	-25.9226	-2349.68		105.2	-474.206	-1258.16		105.2	-2.08937	-288.625		105.2	-55.5037	-5363.46		105.2	-127.349	-1481.3
105.3	3.0966	4.28751	-0.435989	1.14043		105.3	2.04646	-3.66228	3.15206	2.07789		105.3	-12.8032	-523.404		105.3	-26.5453	-2354.35		105.3	-479.188	-1261.89		105.3	-4.26903	-280.841		105.3	-50.833	-5383.08		105.3	-125.481	-1478.18
105.4	2.47384	3.66501	2.05511	3.00879		105.4	-0.133331	-1.79393	3.77519	1.45504		105.4	-14.0487	-530.877		105.4	-27.1681	-2347.81		105.4	-480.122	-1257.53		105.4	-3.33489	-278.973		105.4	-54.5696	-5381.83		105.4	-126.103	-1477.56
105.5	-0.0172081	0.862823	2.67793	0.829208		105.5	5.47136	-3.35077	2.21866	2.07771		105.5	-10.0007	-528.075		105.5	-23.7429	-2352.48		105.5	-477.008	-1266.56		105.5	-5.51455	-280.841		105.5	-58.6175	-5377.78		105.5	-126.103	-1476.63
105.6	0.294174	4.59966	-0.435806	0.517914		105.6	7.96227	-2.72793	-2.14031	-0.413427		105.6	-14.3601	-533.68		105.6	-24.0543	-2354.97		105.6	-475.451	-1250.37		105.6	-3.95765	-275.859		105.6	-58.3062	-5372.8		105.6	-127.972	-1479.43
105.7	-3.13101	-1.62772	1.43254	0.206619		105.7	3.60278	-3.35063	-0.583035	0.832003		105.7	-14.0487	-532.745		105.7	-28.725	-2361.2		105.7	-471.715	-1243.83		105.7	-6.4487	-277.104		105.7	-52.7013	-5375.29		105.7	-122.367	-1471.02
105.8	1.22831	1.79773	0.809845	3.00911		105.8	6.40508	-3.03918	-0.582668	1.45467		105.8	-14.6715	-530.877		105.8	-24.0543	-2376.46		105.8	-464.864	-1251.31		105.8	-4.26903	-281.152		105.8	-39.6233	-5386.19		105.8	-123.301	-1461.68
105.9	1.5397	3.97765	1.12128	2.07506		105.9	4.53664	-2.41635	1.28598	1.1432		105.9	-12.8032	-522.158		105.9	-27.7909	-2371.79		105.9	-473.272	-1259.4		105.9	-4.89179	-280.841		105.9	-41.4916	-5371.24		105.9	-118.63	-1461.68
106	-1.88549	0.86409	2.05548	3.00928		106	0.799927	-3.66181	0.663589	0.208966		106	-9.68937	-525.584		106	-27.7909	-2365.56		106	-472.026	-1255.04		106	-2.08937	-270.565		106	-46.1623	-5360.35		106	-119.564	-1466.66
106.1	-0.639969	3.35538	1.74417	0.829697		106.1	6.40463	-2.7276	0.352576	0.520255		106.1	-10.9349	-536.793		106.1	-30.5933	-2360.58		106.1	-474.517	-1260.03		106.1	-3.33489	-272.122		106.1	-45.2282	-5370.93		106.1	-122.678	-1467.29
106.2	-2.50825	3.04427	2.367	0.829788		106.2	8.89553	1.6318	-1.82672	0.208782		106.2	-14.0487	-543.332		106.2	-32.4616	-2358.4		106.2	-480.433	-1253.18		106.2	-3.02351	-271.811		106.2	-39.0006	-5369.69		106.2	-120.499	-1465.11
106.3	3.40798	-1.00345	2.67844	1.76401		106.3	1.11087	-2.1047	1.28745	0.20869		106.3	-12.1804	-543.021		106.3	-35.264	-2354.66		106.3	-470.469	-1253.49		106.3	-0.532464	-272.745		106.3	-40.5575	-5377.78		106.3	-120.187	-1470.71
106.4	3.0966	3.35614	2.98988	2.69824		106.4	2.979	-1.17049	3.46748	0.208598		106.4	-13.1146	-539.596		106.4	-31.5274	-2350.92		106.4	-466.421	-1260.03		106.4	-1.77799	-276.793		106.4	-39.9347	-5377.78		106.4	-118.007	-1472.89
106.5	2.47384	1.79948	2.36719	2.69832		106.5	0.487823	-2.72733	2.22233	3.01093		106.5	-14.9828	-533.368		106.5	-33.3957	-2345.63		106.5	-472.338	-1264.07		106.5	1.95858	-278.35		106.5	-35.8868	-5373.74		106.5	-120.499	-1477.87
106.6	-1.88549	1.48837	2.36725	2.07562		106.6	2.97871	-1.17036	1.59993	-0.102966		106.6	-14.3601	-523.715		106.6	-34.0185	-2346.56		106.6	-475.763	-1275.59		106.6	-4.26903	-288.003		106.6	-32.1502	-5375.29		106.6	-121.121	-1481.3
106.7	-4.06516	2.11137	2.99007	1.76434		106.7	-1.06937	-5.52962	0.97754	-0.72582		106.7	-11.2463	-523.404		106.7	-34.3299	-2358.71		106.7	-478.877	-1279.64		106.7	-3.02351	-282.709		106.7	-31.8388	-5388.06		106.7	-125.481	-1481.3
106.8	-0.951347	2.11163	1.43323	0.51889		106.8	1.42152	-3.34989	0.977908	1.14237		106.8	-11.869	-519.667		106.8	-34.0185	-2355.91		106.8	-472.338	-1280.27		106.8	-2.08937	-275.236		106.8	-38.6892	-5391.48		106.8	-125.481	-1476
106.9	-1.88549	1.48912	2.6788	2.07587		106.9	4.2238	-1.79292	1.60104	1.14228		106.9	-14.9828	-519.045		106.9	-34.6412	-2351.24		106.9	-472.96	-1283.07		106.9	0.713059	-280.53		106.9	-38.3778	-5383.7		106.9	-123.612	-1479.43
107	-6.24482	2.42351	-0.12355	2.38734		107	3.60089	-1.48147	3.78107	-0.726096		107	-14.3601	-514.063		107	-39.9347	-2345.32		107	-474.829	-1272.17		107	-3.02351	-273.368		107	-41.4916	-5359.1		107	-124.235	-1477.25
107.1	-1.26273	-1.00143	2.36755	1.45328		107.1	2.97798	-3.34969	1.91315	-0.726188		107.1	-10.3121	-521.847		107.1	-39.6233	-2342.83		107.1	-481.368	-1266.88		107.1	-3.64627	-262.158		107.1	-41.803	-5339.79		107.1	-126.103	-1470.4
107.2	-1.57411	2.11264	0.810715	0.830612		107.2	6.40303	-3.03824	0.979376	0.207863		107.2	-12.8032	-522.47		107.2	-37.1323	-2354.66		107.2	-480.433	-1271.24		107.2	-3.95765	-261.224		107.2	-33.7071	-5348.82		107.2	-123.301	-1462.93
107.3	-4.68792	3.3584	1.12215	0.830688		107.3	1.10941	-1.16989	1.29112	2.07605		107.3	-14.3601	-531.188		107.3	-39.9347	-2345.32		107.3	-479.811	-1281.2		107.3	-4.26903	-260.29		107.3	-34.0185	-5353.81		107.3	-117.696	-1469.78
107.4	0.916935	-1.31206	0.499451	1.76491		107.4	2.3548	-4.59501	0.0459695	0.83044		107.4	-15.6056	-530.566		107.4	-39.6233	-2336.6		107.4	-473.583	-1275.91		107.4	-11.1194	-256.865		107.4	-37.1323	-5322.05		107.4	-120.187	-1471.33
107.5	1.85108	-1.62318	2.3678	1.765		107.5	-1.6933	-0.235611	0.0463367	0.207587		107.5	-14.9828	-521.847		107.5	-41.803	-2344.7		107.5	-475.14	-1270.92		107.5	-8.62836	-251.26		107.5	-36.8209	-5324.85		107.5	-122.99	-1465.73
107.6	-1.57411	-0.06604	3.61337	1.1423		107.6	-2.31622	-2.10382	3.16051	0.207495		107.6	-13.7373	-519.979		107.6	-38.6892	-2347.19		107.6	-475.763	-1270.92		107.6	-1.15522	-254.062		107.6	-39.6233	-5333.88		107.6	-118.942	-1468.53
107.7	-4.9993	3.04803	1.43378	1.76515		107.7	-1.07083	-3.66066	-0.26431	0.207403		107.7	-17.1625	-514.063		107.7	-34.9526	-2346.56		107.7	-474.517	-1254.42		107.7	-6.76008	-250.637		107.7	-38.6892	-5318.31		107.7	-117.073	-1466.66
107.8	-2.50825	-0.99968	3.30214	1.76524		107.8	4.84525	-0.235409	2.53848	-1.66097		107.8	-15.2942	-513.128		107.8	-36.8209	-2349.99		107.8	-473.583	-1266.25		107.8	-5.51455	-250.948		107.8	-46.4737	-5318		107.8	-124.235	-1462.93
107.9	-1.26273	0.246109	2.36806	2.69946		107.9	4.53372	-0.858101	1.91609	-1.0383		107.9	-17.1625	-507.212		107.9	-32.1502	-2353.1		107.9	-469.846	-1266.56		107.9	-7.38284	-258.733		107.9	-48.0306	-5328.27		107.9	-122.367	-1465.11
108	-2.19687	1.49188	-0.122925	1.7654		108	4.2222	-2.10356	2.22784	-0.104253		108	-20.2763	-515.931		108	-26.234	-2359.95		108	-471.092	-1265.94		108	-5.20317	-262.158		108	-43.6713	-5328.9		108	-121.744	-1465.42
108.1	-2.19687	2.1149	-1.05701	2.07686		108.1	3.28792	-3.66039	2.85097	-1.03849		108.1	-18.408	-523.093		108.1	-25.6112	-2357.77		108.1	-467.044	-1267.81		108.1	-1.46661	-260.913		108.1	-49.8989	-5328.58		108.1	-123.612	-1462.93
108.2	-0.639969	-0.3759	3.30238	1.76556		108.2	-4.18538	-3.34895	1.60581	-2.59548		108.2	-16.8511	-521.224		108.2	-29.0364	-2355.59		108.2	-462.996	-1270.3		108.2	-6.4487	-263.715		108.2	-45.2282	-5310.52		108.2	-126.103	-1462.3
108.3	4.34212	0.247116	0.500015	1.14288		108.3	-1.38309	-4.90578	1.2948	1.45237		108.3	-17.4739	-512.194		108.3	-36.5095	-2350.61		108.3	-467.978	-1279.02		108.3	-9.87388	-273.368		108.3	-45.5396	-5302.43		108.3	-126.726	-1463.24
108.4	2.16246	2.42702	0.500076	1.76573		108.4	-4.18567	-2.10329	-1.19588	3.94333		108.4	-14.0487	-512.817		108.4	-38.0664	-2338.78		108.4	-462.373	-1286.8		108.4	-9.25112	-274.925		108.4	-40.8688	-5298.07		108.4	-126.103	-1459.19
108.5	1.5397	2.11591	-0.12262	1.76581		108.5	-2.62891	-2.10322	2.22967	2.38633		108.5	-13.7373	-512.506		108.5	-40.5575	-2336.6		108.5	-454.277	-1277.46		108.5	-8.62836	-273.679		108.5	-37.1323	-5291.22		108.5	-124.235	-1459.5
108.6	-0.951347	3.05029	4.85953	0.52037		108.6	-4.18596	-7.08524	2.23004	0.517956		108.6	-11.869	-514.063		108.6	-43.6713	-2345.01		108.6	-451.786	-1276.53		108.6	-11.4308	-273.056		108.6	-39.6233	-5287.17		108.6	-122.99	-1461.06
108.7	-2.81963	1.49365	2.36855	1.76598		108.7	-3.87473	-4.28275	5.65559	-1.97318		108.7	-12.4918	-500.673		108.7	-39.6233	-2344.07		108.7	-455.834	-1271.24		108.7	-9.87388	-264.026		108.7	-37.755	-5293.71		108.7	-125.169	-1465.42
108.8	0.605553	3.98494	2.05722	2.38881		108.8	-8.54558	-3.34854	2.54216	0.517772		108.8	-11.5577	-488.218		108.8	-36.1981	-2347.81		108.8	-458.637	-1274.97		108.8	-9.25112	-257.487		108.8	-34.0185	-5295.89		108.8	-125.792	-1464.48
108.9	3.40798	3.05106	2.68004	-0.102142		108.9	-3.56363	-1.79157	-0.571283	0.829061		108.9	-12.1804	-499.116		108.9	-38.0664	-2335.67		108.9	-458.637	-1273.73		108.9	-7.69422	-264.96		108.9	-37.755	-5300.56		108.9	-120.499	-1452.34
109	3.0966	3.0513	1.1232	0.20932		109	-1.38411	-2.72564	0.363226	1.14035		109	-13.4259	-497.871		109	-41.1802	-2327.88		109	-464.864	-1279.33		109	-5.82593	-269.008		109	-43.3599	-5315.82		109	-122.99	-1450.16
109.1	-0.0172081	0.871887	4.23708	1.45493		109.1	-0.450119	-4.90524	0.0522122	0.828877		109.1	-14.6715	-495.38		109.1	-37.4437	-2327.88		109.1	-462.685	-1273.1		109.1	-7.07146	-268.074		109.1	-47.4078	-5326.09		109.1	-122.99	-1441.44
109.2	0.605553	2.11766	-0.433578	0.832245		109.2	-2.00716	-2.10275	0.363961	1.14017		109.2	-11.2463	-506.278		109.2	-42.4258	-2334.42		109.2	-460.194	-1274.04		109.2	-6.76008	-267.763		109.2	-42.7371	-5327.03		109.2	-122.055	-1436.77
109.3	4.96488	1.49516	2.05753	-0.101822		109.3	-0.450409	-2.10268	-0.881195	0.517312		109.3	-13.7373	-502.23		109.3	-44.9168	-2329.75		109.3	-454.9	-1271.55		109.3	-7.38284	-263.404		109.3	-35.5754	-5312.08		109.3	-121.121	-1438.95
109.4	2.47384	3.36368	0.812073	2.38931		109.4	-5.74403	-3.34814	0.0533142	1.13998		109.4	-14.3601	-496.625		109.4	-44.9168	-2328.82		109.4	-454.277	-1271.55		109.4	-8.93974	-263.092		109.4	-42.4258	-5302.43		109.4	-122.678	-1441.44
109.5	0.605553	1.80704	-1.05614	0.832489		109.5	-3.25313	-3.03669	1.61058	-0.105633		109.5	-16.8511	-505.967		109.5	-46.4737	-2336.91		109.5	-453.966	-1266.88		109.5	-8.31698	-257.799		109.5	-41.4916	-5309.28		109.5	-122.678	-1447.98
109.6	0.916935	-0.683762	0.500824	-0.101578		109.6	-0.450851	-3.65938	2.85647	-1.03987		109.6	-13.7373	-504.721		109.6	-41.4916	-2343.76		109.6	-454.277	-1257.85		109.6	-9.25112	-258.733		109.6	-35.264	-5309.28		109.6	-121.121	-1459.81
109.7	1.22831	0.250641	-0.744644	0.521271		109.7	-1.07375	-0.85689	1.61132	-1.66272		109.7	-12.8032	-511.883		109.7	-44.6054	-2334.11		109.7	-447.427	-1256.29		109.7	-9.87388	-257.799		109.7	-36.5095	-5300.87		109.7	-119.253	-1459.19
109.8	3.0966	0.250885	0.500946	2.07825		109.8	-5.74461	-0.856821	-0.567978	-0.417289		109.8	-14.3601	-514.374		109.8	-43.3599	-2332.86		109.8	-450.23	-1262.83		109.8	-7.69422	-256.865		109.8	-40.8688	-5286.55		109.8	-118.63	-1448.6
109.9	0.916935	4.61047	1.43515	0.832809		109.9	-2.94232	-3.65918	0.989292	-2.90843		109.9	-13.4259	-505.655		109.9	-36.8209	-2331.31		109.9	-450.852	-1271.24		109.9	-11.1194	-254.062		109.9	-40.8688	-5284.37		109.9	-122.055	-1440.2
110	-1.57411	-3.79655	2.36935	2.70119		110	-4.81076	-2.72497	0.366899	0.205288		110	-11.869			110	-35.8868	-2326.95		110	-459.882	-1274.35		110	-9.5625	-258.421		110	-42.7371	-5284.37		110	-120.187	-1438.95
110.1	-1.57411	2.4313	-0.121628	1.45573		110.1	2.03947	1.63443	1.30141	1.45072
110.2	-0.951347	3.98846	0.50119	0.210312		110.2	4.21899	-2.41346	1.92454	0.516484
110.3	-2.81963	0.252151	0.812637	0.833145		110.3	7.02127	-1.79063	2.85904	-1.35189
110.4	2.47384	1.8093	1.12407	0.833221		110.4	3.28456	3.50291	1.30251	1.76182
110.5	-0.0172081	3.05508	0.501373	0.210556		110.5	1.41612	-1.47911	0.368735	0.516209
110.6	-1.57411	2.43256	2.05833	-0.100754		110.6	4.21841	1.32338	-0.25366	1.13888
110.7	-1.57411	1.1873	0.501495	0.522079		110.7	1.72722	-3.03588	0.99223	-1.04088
110.8	1.85108	0.87616	0.812943	0.2108		110.8	-0.452591	-4.28133	2.23812	-0.418209
110.9	-0.328587	0.876419	0.501617	-0.723267		110.9	2.66107	0.0780602	0.992964	0.515841
111	-3.13101	1.18805	0.813065	-0.100433		111	4.52921	0.0781288	0.0591903	-1.04115
111.1	-4.9993	1.81107	-0.432388	-0.100342		111.1	6.70872	-1.16733	-1.80873	0.827038
111.2	-0.639969	1.18855	1.74734	0.211121		111.2	5.46304	-2.72416	0.682686	-0.107196
111.3	-4.68792	1.18881	0.190491	1.76811		111.3	2.34911	-2.41272	-0.562469	1.13823
111.4	-3.44239	1.81181	-2.92325	-1.03424		111.4	7.64243	-0.232983	1.30618	-0.41876
111.5	-2.50825	1.81207	0.813385	0.834122		111.5	2.34882	-1.47844	-1.1845	-0.418852
111.6	0.605553	1.50095	1.12482	1.14558		111.6	-0.765152	0.389912	0.372775	0.203817
111.7	4.96488	2.12396	-0.120636	-1.96814		111.7	0.168854	-2.10106	0.995903	1.76063
111.8	5.27626	0.878677	0.502182	1.45712		111.8	1.41423	-4.28066	-1.80616	0.515013
111.9	-0.951347	1.19032	-1.9888	1.45721		111.9	0.791321	-0.855408	1.30802	0.826302
112	1.22831	0.879181	0.81369	0.523148		112	1.41394	-2.41224	-0.871279	0.203449
112.1	2.47384	0.87944	-1.05453	0.211868		112.1	2.97069	-0.855272	-1.18229	1.44888
112.2	-3.75378	1.19107	-0.431717	0.211945		112.2	1.72504	-1.78935	-0.559164	1.44879
112.3	-0.639969	0.879944	-1.3658	-1.34489		112.3	1.10211	-3.96894	-1.18156	0.514554
112.4	-0.0172081	1.81433	-1.05435	2.08038		112.4	2.97026	0.079071	-2.11533	-0.41968
112.5	1.85108	-0.987839	-2.92258	-0.0991974		112.5	3.90425	3.50433	0.37608	2.69403
112.6	3.40798	2.43759	-0.742859	-1.03326		112.6	2.96997	-1.4777	-0.246315	-2.28815
112.7	1.85108	2.74924	-3.8566	-1.03317		112.7	0.790161	-1.16625	0.688194	0.202805
112.8	1.85108	1.19258	-0.431335	-0.0989532		112.8	3.28105	2.88177	0.0658007	0.514093
112.9	-0.639969	3.06113	-1.6768	-1.65578		112.9	2.34677	2.25907	-3.04764	-1.35428
113	4.03074	-0.675201	-1.36536	-1.65569		113	1.41248	3.81604	-1.49037	0.202529
113.1	0.916935	2.43886	-2.29944	0.524048		113.1	5.14891	1.63645	0.0669022	-1.35447
113.2	1.85108	-0.0519409	-0.742477	-1.03276		113.2	2.03494	-0.85453	0.0672693	-0.420415
113.3	4.03074	0.259705	-1.67656	-2.90097		113.3	-2.01314	-0.854464	-2.11203	0.513634
113.4	1.22831	1.81685	0.191788	0.212921		113.4	-3.88158	-0.543015	-1.4889	1.44768
113.5	-0.328587	-0.362564	-0.119522	1.76991		113.5	-1.07928	-2.09985	-0.86577	1.13621
113.6	0.916935	-0.0509338	-1.36499	-0.0982971		113.6	2.03436	-1.7884	-0.242642	1.4475
113.7	-0.639969	-0.984833	-0.430786	0.524536		113.7	1.41145	-3.968	-1.4878	1.13603
113.8	-2.19687	-0.673187	-2.61038	-1.03227		113.8	3.90236	-1.78827	0.0694728	2.38146
113.9	-2.19687	1.50673	-1.67619	-2.90048		113.9	4.21359	-1.47682	-1.17568	0.513082
114	3.71936	-0.0499268	-2.92165	2.0817		114	3.59068	-4.27918	-1.4867	-0.421151
114.1	2.16246	-1.2952	-2.6102	2.39316		114.1	2.34502	-5.52464	0.381956	2.38118
114.2	3.71936	0.573349	0.815048	0.213577		114.2	2.34488	-1.788	-2.73148	0.201426
114.3	1.22831	-1.60608	-1.98732	0.836426		114.3	1.41058	-7.39278	-1.48559	1.13548
114.4	-3.13101	-3.16272	-0.74173	-0.097641		114.4	5.45839	-2.72201	-0.862465	3.31505
114.5	-5.31068	-0.671432	-0.741669	-0.0975647		114.5	5.45824	-1.7878	-0.239337	1.13529
114.6	0.294174	0.885727	0.503922	-0.0974731		114.6	2.0329	-1.47635	-0.550351	1.44658
114.7	-0.951347	-1.60507	-0.118774	-2.89983		114.7	1.41	-0.542139	-4.90931	1.13511
114.8	-0.951347	-1.29343	-1.36424	-0.408707		114.8	-3.88362	1.32621	-1.48376	0.512255
114.9	3.71936	-0.0476685	-1.67557	-0.408615		114.9	-3.57237	0.392136	-0.549249	2.38045
115	1.85108	-3.78397	-3.54378	-1.0313		115	-3.57253	-1.1647	-0.860262	2.38035
115.1	1.5397	-2.53821	-1.05267	-2.27673		115.1	-3.26129	-3.65568	-3.03956	1.7575
115.2	3.40798	-2.84932	-1.05261	-1.96527		115.2	-9.48904	0.392338	-3.35057	2.06879
115.3	4.03074	0.264725	-1.98669	-0.719666		115.3	-4.50711	-1.78726	-4.59573	-0.110966
115.4	2.16246	-0.669159	-1.98663	-0.408203		115.4	-4.81863	0.392473	-3.9726	1.13446
115.5	2.47384	0.265228	-1.6752	-1.96503		115.5	-2.63911	0.39254	-5.52914	2.06851
115.6	2.47384	-0.668655	1.43867	-2.27634		115.6	2.65422	-2.09844	1.94437	1.13428
115.7	2.78522	-0.979797	-3.23198	0.526184		115.7	-1.0825	2.26096	1.32197	0.200047
115.8	3.71936	-0.979538	-0.740875	-1.03064		115.8	-6.6875	-0.541397	-2.72561	2.06824
115.9	3.71936	-1.91344	-1.98633	-1.65331		115.9	-4.19661	-1.16409	-2.41386	2.69091
116	1.5397	-1.29041	-2.29765	-1.34186		116	-4.8195	-0.229885	-2.10211	2.69082
116.1	2.47384	-3.15845	-1.67482	-1.96454		116.1	-4.1969	-0.852577	1.9462	3.31349
116.2	2.47384	-3.46957	-3.23166	-1.65306		116.2	-6.06532	0.0816307	2.25795	2.69063
116.3	-1.26273	-4.09209	-2.29745	0.215302		116.3	-2.01752	3.81827	-2.41239	2.06778
116.4	-0.0172081	-0.666641	-1.05186	0.526749		116.4	0.473373	2.26143	-5.52583	3.93597
116.5	-4.68792	-3.7802	-1.67458	-3.5211		116.5	-2.32919	1.32736	-2.41166	3.00174
116.6	-6.24482	-2.22304	-3.54279	-1.34137		116.6	-3.57486	-0.540859	-1.78853	2.37888
116.7	0.605553	-2.22279	-1.36307	-1.02991		116.7	-6.68881	-2.09769	-1.78816	0.199127
116.8	-2.19687	-3.15668	0.50528	0.215714		116.8	-4.50929	1.95032	-2.41055	3.31284
116.9	-4.68792	-1.59953	-3.23123	-1.02974		116.9	-5.75496	4.44143	-1.47605	2.06723
117	-0.328587	-2.22203	-2.91978	0.527252		117	3.27493	1.63907	-2.7212	2.06713
117.1	1.22831	-4.71283	-1.98558	-0.406815		117.1	2.96339	3.50743	-4.9005	2.6898
117.2	0.916935	-1.91016	-1.05138	-1.0295		117.2	-4.50987	3.81887	-2.0977	3.62385
117.3	-0.639969	-3.77818	-0.117172	0.527496		117.3	-2.01898	3.81894	-2.7201	2.37824
117.4	2.16246	1.51555	-0.117111	-1.96347		117.4	-2.95326	3.50763	0.394074	1.13263
117.5	4.03074	1.51579	-1.67397	-0.406494		117.5	1.7173	0.393887	0.705822	3.62358
117.6	2.78522	-2.22052	1.12852	-1.9633		117.6	2.02853	-0.228806	-1.47348	3.93487
117.7	1.22831	-0.663376	-2.91934	0.216446		117.7	2.02838	-2.09702	-1.47311	1.75511
117.8	1.85108	-0.974503	-1.36238	-0.40625		117.8	0.159958	2.26237	-1.16136	2.68916
117.9	3.40798	-2.84253	-0.739563	-1.65167		117.9	0.782578	-1.47413	-2.09513	4.24597
118	1.5397	-1.59676	-0.428116	-1.6516		118	0.471039	-0.539915	-2.40615	3.9345
118.1	0.605553	-1.59651	-0.116669	-1.02875		118.1	-0.463242	-0.539848	1.01941	2.68888
118.2	-0.0172081	-1.28487	-2.29628	2.39651		118.2	0.159363	1.3285	-1.78265	3.93432
118.3	2.16246	-2.53015	0.50621	0.216934		118.3	-3.57733	1.95133	-0.848143	0.197656
118.4	2.47384	-0.661606	-0.739258	-2.27403		118.4	-9.18234	-1.16241	-0.536395	-0.736578
118.5	4.34212	-0.661362	-0.739197	0.528473		118.5	-7.62558	-0.228201	-1.47017	2.37714
118.6	4.34212	-1.59525	-1.36189	0.528549		118.6	-8.55988	1.32877	-1.78118	2.68843
118.7	2.16246	-2.52914	-1.05045	-0.405502		118.7	-8.8714	0.706078	-2.40358	2.68833
118.8	0.916935	-0.349213	-1.05038	0.217346		118.8	-7.00325	1.32891	-1.15769	2.37686
118.9	8.39007	-0.0375977	1.12933	-0.716705		118.9	-11.9855	1.01759	1.33372	2.37677
119	4.03074	-2.217	-0.116119	-0.405258		119	-9.49458	-2.09615	1.02271	-1.04851
119.1	3.71936	0.897049	0.818085	-1.6507		119.1	-7.00369	-1.47332	-1.77935	2.37658
119.2	3.71936	0.274551	-1.05014	-0.0937042		119.2	-10.7404	1.95194	-3.0245	3.9334
119.3	-1.26273	0.274796	-2.29561	2.08603		119.3	-7.00398	0.3951	0.401052	1.75364
119.4	0.916935	0.275055	-0.11586	1.77473		119.4	-2.64479	1.64069	1.02418	3.31045
119.5	3.40798	1.8322	-0.427185	0.529297		119.5	3.27129	2.26352	-0.843736	5.17864
119.6	0.916935	-2.83826	1.75255	0.529373		119.6	-0.465439	4.13187	-4.26856	2.68751
119.7	-1.26273	2.14409	1.44122	0.840836		119.7	-4.82491	2.88641	-3.02267	2.37603
119.8	0.294174	-0.658096	-1.04976	-1.02736		119.8	0.157028	-1.78423	1.95979	2.68732
119.9	-1.88549	-1.90337	0.507202	1.46376		119.9	-0.465866	-3.02968	-0.842267	4.24413
120	-1.88549	-2.52588	0.195877	1.46385		120	1.71365	-3.02962	-1.77604	0.196093
120.1	2.78522	0.27681	-1.67235	-1.02711		120.1	-1.08891	-2.09541	-0.530152	2.37567
120.2	3.71936	-0.0343323	-1.98366	-1.02704		120.2	-2.64597	-4.58638	-1.77531	1.75281
120.3	1.5397	-1.90236	0.507446	-1.33833		120.3	-0.466446	-2.09527	-3.33184	2.68686
120.4	-2.19687	-0.0338287	0.507507	0.841415		120.4	0.467545	-4.58625	0.0937109	2.68677
120.5	2.16246	-1.59047	-1.04933	1.15286		120.5	3.58119	-2.40652	-1.15144	2.99806
120.6	1.85108	-3.45851	1.13039	-1.0267		120.6	2.9583	-2.09507	-3.9535	2.37521
120.7	-1.26273	0.589706	-0.115067	1.15303		120.7	3.89229	-1.16086	-1.15071	0.81821
120.8	-5.93344	-1.27834	0.196365	-1.02654		120.8	1.71249	-3.65184	1.02932	2.99778
120.9	-1.57411	-1.27808	1.75334	-1.64922		120.9	-1.40147	-3.65177	-1.46136	1.12941
121	1.5397	-0.655075	-1.04901	1.77605		121	-1.71298	-4.58585	-2.70651	3.93174
121.1	1.5397	-1.58896	0.819336	3.33304		121.1	-2.02452	-4.89716	1.3418	2.68613
121.2	1.85108	-2.83423	2.99905	0.530685		121.2	-5.13846	-2.09466	0.71941	2.37465
121.3	3.40798	-0.0315552	-0.114685	1.15352		121.3	-7.31828	-2.40598	-1.14851	3.3087
121.4	2.16246	-1.8996	0.196747	1.77638		121.4	-3.27049	-2.09453	0.408764	4.86551
121.5	5.27626	-2.83347	0.508194	2.7106		121.5	-5.76167	2.26487	0.409132	3.6199
121.6	3.0966	-0.964951	-0.114502	1.15376		121.6	-7.00734	0.396648	1.34364	1.12876
121.7	3.71936	-2.52159	0.508316	0.531097		121.7	-3.27092	1.01948	1.65539	-1.05099
121.8	0.916935	-2.83272	1.44252	0.219803		121.8	-3.58244	-1.78288	-0.835289	2.68548
121.9	-1.26273	-2.2097	1.75397	2.71094		121.9	-4.51672	0.0854702	0.0992193	2.37401
122	-0.0172081	-0.652557	-0.114258	1.1541		122	-1.40308	-1.78275	0.722348	0.817015
122.1	0.916935	-0.340912	0.819946	0.842804		122.1	-6.6967	-3.33958	2.27962	1.1283
122.2	4.6535	-1.27481	-0.736908	2.3998		122.2	-2.33751	-1.15985	1.34584	2.68511
122.3	1.5397	-2.52008	-0.736847	1.46573		122.3	-2.02628	0.708504	1.03483	3.30778
122.4	2.78522	-1.27431	2.06564	0.220291		122.4	1.71016	-0.848333	1.34658	4.24183
122.5	-2.50825	-0.0285339	2.0657	1.15451		122.5	3.26691	-4.27345	1.03556	-0.740348
122.6	-4.68792	-2.20795	2.68852	1.15459		122.6	-1.71532	-1.78234	1.97007	2.06199
122.7	-2.81963	-1.89632	2.99998	3.33435		122.7	-0.158569	0.08601	-2.38889	2.06189
122.8	-3.75378	-0.0277863	1.75453	0.843384		122.8	7.93718	-1.78221	0.725286	2.0618
122.9	-4.68792	-2.20718	-0.113693	2.40036		122.9	5.13461	-0.225237	-0.208489	2.06171
123	-2.81963	-0.961426	1.44327	2.71184		123	0.152359	-4.5845	1.97154	1.75024
123.1	-1.88549	0.90712	1.44333	0.532242		123.1	-0.781921	-7.07547	-0.207755	2.99567
123.2	-3.44239	0.595993	3.31168	3.64613		123.2	-0.782074	-1.15918	1.03814	2.37281
123.3	-1.57411	-0.649277	3.31174	0.843796		123.3	-3.27325	-0.847727	1.0385	1.1272
123.4	-2.50825	-0.337646	-0.424774	3.6463		123.4	4.82249	-5.82975	1.66163	3.61815
123.5	1.22831	0.28537	1.44357	0.843948		123.5	8.24754	-1.15898	2.90752	0.504254
123.6	-0.0172081	-1.89406	1.44363	1.77818		123.6	2.64255	-5.20685	3.21927	2.06107
123.7	-1.26273	-0.64827	4.24612	0.844116		123.7	3.88792	-4.27264	2.59687	2.06097
123.8	-0.0172081	-3.13907	1.75514	3.02386		123.8	-1.09431	-1.15877	1.97448	1.43812
123.9	-2.81963	0.909134	0.198288	2.0898		123.9	2.95348	-1.78147	2.28623	0.815268
124	1.85108	-0.647522	3.00078	3.3354		124	2.95334	-2.40416	0.106932	2.0607
124.1	-0.951347	-1.27002	2.0667	0.533066		124.1	-2.34029	-0.224428	0.41868	1.43784
124.2	-0.639969	0.909882	1.75539	2.40143		124.2	-4.52008	-0.22436	1.35319	1.12637
124.3	-1.26273	2.77843	3.00098	2.4015		124.3	-6.38852	-2.09258	2.2877	2.99456
124.4	-0.0172081	-1.58066	4.24657	1.46745		124.4	0.15033	-2.71527	3.22221	1.12619
124.5	1.5397	-0.334869	3.62386	0.222015		124.5	-2.34087	-4.58349	1.35429	1.1261
124.6	-1.57411	-0.957397	-0.735413	0.533478		124.6	-6.07756	-1.46961	1.66604	1.74877
124.7	0.916935	-1.26851	0.510178	3.64737		124.7	3.2637	-4.58335	1.66641	0.814532
124.8	-0.0172081	-0.0227509	0.510239	1.46777		124.8	4.50906	-0.535336	1.66677	2.05996
124.9	2.78522	1.53442	2.0672	2.71339		124.9	-2.03006	-2.09217	0.421618	0.502967
125	1.85108	-0.95639	1.75589	3.64761		125	-4.83264	-0.223822	1.97889	-1.05403
125.1	1.22831	-1.2675	0.821808	3.02492		125.1	-10.1263	-0.535133	2.60202	-0.119977
125.2	-1.57411	-0.0217438	1.44463	1.15672		125.2	-6.70122	-1.46921	2.60238	-0.742831
125.3	2.47384	1.22404	1.44469	1.77957		125.3	-3.58754	-1.78052	3.22551	2.99364
125.4	7.14455	2.15843	3.00165	1.77965		125.4	0.771637	-0.846313	4.16002	1.74803
125.5	1.5397	-0.0209808	2.06757	1.77974		125.5	-3.58784	-1.15763	4.47177	2.3707
125.6	0.294174	1.53618	1.75626	1.77982		125.6	-1.40833	-0.846178	-2.68962	-0.431818
125.7	-6.24482	0.602295	2.37907	1.77991		125.7	4.50775	-2.71439	-0.820967	1.43637
125.8	0.605553	1.2253	0.822235	2.40274		125.8	-0.785858	-3.33709	0.113542	-1.36614
125.9	-2.50825	-1.57689	2.06781	1.78006		125.9	-0.786011	-7.07359	1.04805	1.74757
126	-3.44239	2.7827	2.69064	2.09152		126	-0.786148	-1.46867	1.98256	0.501956
126.1	3.40798	0.291901	4.24762	1.46884		126.1	-0.474915	-5.51655	-0.819498	-0.120897
126.2	4.03074	-1.57613	3.93629	0.846161		126.2	-0.475052	-8.31891	-1.44189	0.813153
126.3	2.16246	-0.330353	3.62497	1.7804		126.3	-0.163818	-5.8278	1.98366	-0.743843
126.4	1.5397	-0.330093	1.44537	3.33737		126.4	-2.65501	-3.0253	6.03198	0.190207
126.5	-3.75378	-0.952621	3.00233	0.223648		126.5	-0.78688	-1.15695	2.29578	2.0584
126.6	-1.88549	1.22731	2.06825	3.02615		126.6	-1.72116	-4.58207	2.29614	0.190023
126.7	1.22831	-3.13177	1.75694	3.33762		126.7	0.146973	-3.0251	1.05099	-1.05559
126.8	-2.19687	-0.640472	2.06837	4.58322		126.8	2.94925	-0.533987	3.23102	0.50122
126.9	-1.57411	2.47357	2.06844	-1.02155		126.9	2.32635	-2.40221	2.29725	-0.121633
127	-0.328587	0.294174	3.00264	3.33786		127	0.14653	-2.09076	2.60899	0.189656
127.1	1.22831	1.22856	3.0027	3.33795		127.1	-1.09912	0.400354	1.36384	0.500944
127.2	-1.88549	3.40848	2.69138	2.40388		127.2	0.457626	-4.58167	1.98697	-0.433289
127.3	-5.93344	0.917679	2.38007	2.71535		127.3	-1.41081	-6.76127	1.05319	0.812141
127.4	1.22831	0.917938	3.00288	4.58371		127.4	-0.788193	-3.95877	1.05356	0.189288
127.5	-2.81963	0.918182	0.823288	2.71552		127.5	2.32547	-3.33595	-2.37126	0.189196
127.6	-4.68792	2.16397	2.69164	0.535934		127.6	2.63672	-3.0245	0.431533	-0.745038
127.7	-3.75378	0.918686	4.24861	1.47015		127.7	0.76828	-2.40167	2.30018	-0.122368
127.8	-0.639969	0.918945	1.75763	1.15884		127.8	0.14537	-4.58126	0.743648	0.18892
127.9	-4.37654	-0.949097	1.75769	2.40446		127.9	3.5704	-2.09015	0.744015	-1.67946
128	-5.62206	2.47635	1.75775	1.4704		128	-0.16629	-3.33561	2.92405	-0.745406
128.1	-4.06516	-2.19411	2.06918	1.15909		128.1	-4.2144	-4.58106	0.121989	-2.3024
128.2	-0.0172081	2.47685	1.44649	2.71609		128.2	-0.477982	-5.82652	2.30202	-2.92525
128.3	1.22831	3.72263	3.00345	3.02754		128.3	2.01292	-5.51507	1.36825	2.05674
128.4	-1.57411	1.23184	1.44661	0.536575		128.4	2.32416	-5.82638	1.05723	3.61356
128.5	0.916935	-0.013443	1.75806	-1.64299		128.5	-2.96945	-1.46699	1.0576	2.9907
128.6	-2.50825	3.10063	4.24916	1.47089		128.6	0.144196	-2.40106	2.92625	-0.123196
128.7	-2.81963	3.10088	2.06955	1.15959		128.7	5.74892	-3.02375	4.7949	-0.123288
128.8	-2.19687	4.03528	-0.110046	1.78244		128.8	3.56909	-3.64645	3.86113	-0.43476
128.9	-2.50825	2.16724	2.06967	2.09389		128.9	1.0779	-3.64638	0.124927	2.36757
129	-3.13101	5.2813	-0.732697	1.15984		129	-2.03604	0.0902538	-0.186087	2.36748
129.1	1.22831	1.85635	-0.109863	0.848541		129.1	-3.59309	-2.08934	-0.4971	1.12187
129.2	1.5397	1.54524	2.38124	-0.0855255		129.2	-4.52737	-3.64618	0.748789	-0.74651
129.3	-0.328587	2.47961	3.31546	2.40561		129.3	-1.10234	-1.15507	1.37192	0.498921
129.4	1.22831	2.1685	0.513092	2.71707		129.4	3.56822	-4.2688	1.68367	0.187449
129.5	-1.57411	0.300461	-1.35513	0.22612		129.5	3.2567	-2.40046	-0.184251	-0.746785
129.6	-4.37654	-0.633423	0.8246	2.09447		129.6	5.43622	-2.71177	1.99578	-1.68102
129.7	-3.13101	2.79201	3.00432	0.84903		129.7	4.50192	-5.20275	1.06201	-1.36973
129.8	-7.80172	2.79227	2.38162	-1.01917		129.8	1.38797	-4.26854	0.439612	-1.36982
129.9	-2.50825	2.79251	1.44754	0.22644		129.9	0.142303	-0.531898	1.6855	-0.124392
130	-1.88549	-0.32103	2.38174	0.849274		130	0.453537	-0.843214	1.06311	0.498278
130.1	-0.639969	1.23611	2.38181	1.47212		130.1	-0.169357	-2.08867	3.55452	-0.124575
130.2	4.6535	1.54776	-0.731949	0.849442		130.2	-2.97194	0.0910625	1.37522	1.12086
130.3	2.47384	1.23662	0.825027	0.849518		130.3	-4.52898	-2.39992	1.06421	1.74352
130.4	0.605553	1.85963	1.13646	1.78375		130.4	-6.08603	-3.33399	1.06458	1.74343
130.5	1.22831	3.10541	1.44791	-0.0844574		130.5	-7.02031	-1.46564	0.753564	0.186437
130.6	0.916935	0.614624	-1.04308	3.34082		130.6	-5.46356	-1.46557	1.99945	1.74325
130.7	-1.57411	-1.25342	1.44803	1.16122		130.7	-2.66129	-2.39965	0.131537	-0.125127
130.8	-1.26273	-0.630402	2.38223	-0.0842133		130.8	-1.41591	-3.33372	-1.11362	0.497542
130.9	-2.19687	-0.00740051	0.514008	2.09554		130.9	-9.82333	-2.08813	2.62332	2.36573
131	2.47384	0.304245	-1.3542	-0.395432		131	-10.1349	0.0916004	1.06678	-0.436783
131.1	2.78522	-0.94104	1.44829	-2.8864		131.1	-6.08705	-2.08799	-0.489755	0.808647
131.2	-0.951347	1.23889	1.75974	1.78441		131.2	4.18837	-0.842405	2.62442	-1.37111
131.3	-2.19687	-0.62915	-0.10849	1.16171		131.3	2.94269	-3.022	-0.489021	-0.74844
131.4	-0.328587	2.7963	-0.731201	-1.01785		131.4	-1.41678	-2.39918	-2.04556	-0.437151
131.5	2.78522	-0.317261	-0.73114	0.85051		131.5	-3.59659	-0.530821	-3.29071	0.185518
131.6	2.16246	-0.317001	0.51445	0.227829		131.6	-8.26746	0.403385	1.69175	1.11957
131.7	9.01283	-0.00538635	2.69417	-1.95175		131.7	-7.02206	-4.89002	0.44659	2.05362
131.8	3.40798	-0.93927	-1.35371	-1.32892		131.8	-11.0702	-3.33305	-2.04409	0.185242
131.9	3.71936	-1.56178	-1.04227	0.539444		131.9	-3.2858	-5.82402	1.07009	0.807911
132	-0.951347	-1.25015	1.76022	-0.0832214		132	0.450623	-5.2012	0.136311	1.43058
132.1	-3.13101	-0.31575	0.826141	-1.64005		132.1	-6.71127	-4.88975	-1.42023	-0.126414
132.2	1.85108	-0.00413513	0.826202	0.539688		132.2	-0.795197	-3.0214	1.07119	-0.749268
132.3	3.0966	0.930267	-0.419266	0.53978		132.3	1.38432	-3.33271	1.38294	0.496162
132.4	2.47384	-0.937775	-0.730591	0.228485		132.4	2.62971	0.0925446	-3.91017	-0.12669
132.5	4.03074	-0.626129	-1.66467	-1.9511		132.5	-0.172867	-1.15291	-1.73014	3.2984
132.6	3.71936	-0.314499	-1.04182	-0.70549		132.6	-1.41853	-2.39837	2.94094	1.11865
132.7	4.96488	2.1768	-0.730392	0.228729		132.7	-0.795929	-2.3983	0.450263	2.36408
132.8	-0.639969	1.86566	-0.107559	-0.393951		132.8	-2.97572	-2.39823	-0.172132	-0.74982
132.9	0.916935	-0.00236511	-1.04164	-1.01663		132.9	-2.04173	-0.2185	-0.171765	-0.43853
133	0.916935	1.86617	-2.59848	-1.32794		133	-2.35326	-1.46395	-1.10554	2.67518
133.1	-0.0172081	-0.936005	1.76091	-2.26199		133.1	0.44902	-1.46389	1.07449	-1.37286
133.2	-1.57411	-1.24713	-2.59836	0.229141		133.2	1.07162	-0.529676	-1.72757	-0.438806
133.3	2.16246	-1.86964	-0.107254	-2.26184		133.3	-7.0244	-1.46375	-2.03858	0.806624
133.4	6.83317	-0.623871	-0.107193	-0.082077		133.4	-8.27008	-1.15231	-0.792689	-0.750371
133.5	5.89902	-2.80327	-0.729904	0.852142		133.5	-4.84503	1.65019	-1.72646	2.9861
133.6	3.40798	0.622162	-1.66399	-1.01605		133.6	-4.84518	-0.840788	-1.7261	-0.750556
133.7	5.58764	1.24518	-0.729782	-2.88426		133.7	-1.42014	-3.64315	-2.03711	-1.37341
133.8	0.916935	-0.311478	0.827194	-0.704514		133.8	-2.97719	-1.7748	-2.6595	0.494783
133.9	4.96488	-0.93399	-0.418274	-1.01581		133.9	-3.91147	-0.840588	-0.479473	-0.43945
134	2.16246	0.000396729	-0.729599	1.16393		134	0.136322	0.0936222	-1.10187	1.11736
134.1	1.85108	-1.86763	-1.35229	-0.392899		134.1	5.11827	-1.46321	-0.790118	0.494507
134.2	1.5397	-0.310471	-1.35223	-2.26109		134.2	1.38156	-3.33143	-2.65804	0.494415
134.3	3.71936	-2.48988	-1.66354	0.230042		134.3	1.38141	-0.840317	-1.72353	1.42847
134.4	5.89902	-1.24411	-0.72934	-1.0154		134.4	-1.10977	-1.46301	-1.1004	0.182851
134.5	2.16246	-0.621094	-1.97479	-2.26085		134.5	-0.798553	1.33948	0.145492	2.98518
134.6	2.78522	1.24744	-0.106445	-3.81767		134.6	-1.42145	1.33955	-1.72242	2.98509
134.7	-0.328587	-1.55473	0.516373	-0.0810089		134.7	-4.84679	-0.840048	0.768988	1.11672
134.8	2.78522	-0.620346	-1.35185	-0.392319		134.8	-2.66725	-0.528599	-2.65583	1.42801
134.9	0.294174	-0.620087	0.516495	-2.88329		134.9	-4.84708	-3.33096	-3.58961	2.05067
135	4.03074	-1.2426	-2.28587	-2.26044		135	-2.66756	-4.26503	-3.90062	2.67334
135.1	2.47384	-1.86511	-2.28581	-1.32622		135.1	-3.60184	-2.70806	-3.90025	0.493588
135.2	2.78522	-1.55348	-1.97437	-0.391998		135.2	-1.42233	-4.2649	-4.83403	1.42764
135.3	0.294174	1.24921	0.828125	0.230865		135.3	-5.7818	-6.13312	-3.58814	1.11617
135.4	1.22831	-0.930222	-0.728729	-1.94873		135.4	-2.35677	-6.13305	-2.65363	0.493312
135.5	-0.639969	-1.24133	-1.97418	-1.63725		135.5	-1.42276	-3.64193	-4.83292	0.181839
135.6	8.39007	0.315811	-1.66275	-0.703033		135.6	-5.47086	-5.19877	1.08367	0.804509
135.7	3.71936	-1.55222	-0.728546	-2.57124		135.7	-8.27344	-5.51009	2.32956	2.6727
135.8	-0.328587	0.00492859	-1.974	0.854034		135.8	-8.58496	-3.64173	-2.34078	2.04985
135.9	1.5397	-2.17447	-1.97392	-1.63693		135.9	-7.65097	-2.70752	-0.472128	0.492852
136	2.16246	0.316818	-2.28525	0.23143		136	-7.02834	-1.46193	-2.96281	4.54071
136.1	4.03074	-3.10811	0.517242	1.78842		136.1	-4.22607	-1.46187	2.01965	1.42681
136.2	7.14455	-0.928207	-1.97374	-1.01393		136.2	-2.35793	-0.839037	1.39726	3.295
136.3	-1.88549	1.25172	-1.66231	-2.25937		136.3	-3.29222	-3.33002	-1.09342	3.29491
136.4	1.22831	-0.927704	-1.66225	-0.0796204		136.4	-2.98097	-0.527521	-4.20686	2.98344
136.5	3.40798	-0.616058	-0.416656	0.543213		136.5	-0.178696	-1.4616	-4.20649	0.803681
136.6	10.2584	0.941086	-1.03935	-1.32498		136.6	0.443909	-2.39567	-2.9606	3.60602
136.7	4.34212	0.318588	-1.97343	-0.390762		136.7	-4.8497	-6.13217	-3.583	3.29454
136.8	0.916935	-3.10635	-0.416473	0.543457		136.8	-6.40675	-0.838633	-2.33711	-0.753498
136.9	0.916935	-3.10609	-0.727798	1.78908		136.9	-6.40689	-2.70685	-2.33674	2.04884
137	1.85108	-1.54895	-2.59601	-0.0791321		137	-3.29324	2.27531	-3.89328	3.91703
137.1	3.40798	-3.10559	-1.03905	-1.0132		137.1	-8.27547	0.407091	-2.02462	3.60556
137.2	2.78522	0.631226	-2.90727	-0.39035		137.2	-6.40733	-2.39527	-2.9584	1.73718
137.3	3.40798	-2.7937	-1.97307	-1.01303		137.3	-6.09608	-2.3952	-2.64665	0.802946
137.4	3.0966	-2.1707	1.76357	-1.01294		137.4	-5.47348	-2.39513	-1.08938	2.67114
137.5	0.916935	-2.7932	-1.97295	-1.01286		137.5	0.13121	0.40736	-0.154871	2.67105
137.6	-1.88549	-3.7271	-0.104584	-0.39003		137.6	-1.42583	-1.46086	-1.40003	2.35957
137.7	-4.68792	-0.924423	-4.46385	-1.32408		137.7	-2.04874	-0.526644	-2.95656	3.91638
137.8	-0.951347	-4.03798	-1.97275	-0.078476		137.8	-4.22855	-1.14934	-1.71067	3.29353
137.9	-1.88549	-3.10358	0.829742	1.16711		137.9	-4.85146	-0.215132	-2.64445	4.53896
138	1.22831	-0.300903	-0.415726	1.47859		138	-4.85159	2.27598	-3.8896	4.85025
138.1	0.916935	0.0107117	0.518478	0.855911		138.1	-2.67207	1.34191	0.158713	3.91602
138.2	4.96488	-0.611786	-0.104218	-1.32367		138.2	-3.60635	-2.39459	0.15908	4.2273
138.3	4.03074	-0.922928	-2.28383	-0.38945		138.3	-0.804092	-3.64005	-1.70884	3.29307
138.4	4.34212	-0.611282	-0.726868	-0.0779877		138.4	-3.60666	1.34211	-2.33123	-2.00049
138.5	3.40798	-2.16794	1.45287	1.479		138.5	-8.27751	-1.46025	-1.39672	2.67013
138.6	3.71936	-4.97011	-1.03812	-1.01196		138.6	-6.09799	-3.01709	-1.70773	2.67003
138.7	4.34212	-4.96986	-0.726685	-1.01189		138.7	-6.40952	-4.57392	-2.33013	0.801658
138.8	-0.639969	-4.9696	-2.28352	-0.389038		138.8	-5.16414	-4.57385	-2.95252	2.35847
138.9	-0.328587	-2.16693	-1.03793	0.545181		138.9	-1.73909	-3.63964	-0.461111	3.29252
139	0.916935	-3.10081	0.519028	-0.388885		139	-0.182343	-5.19648	0.162018	-2.00104
139.1	-0.639969	-1.85506	-1.3492	0.856735		139.1	1.68579	-4.26227	-0.460376	1.11267
139.2	5.58764	-3.72307	-1.34912	2.10233		139.2	-2.05092	-4.2622	-1.08277	3.915
139.3	6.2104	-1.54317	-0.726303	0.234146		139.3	-2.05107	-3.63937	-0.771022	1.73525
139.4	4.6535	0.948135	-0.726242	-1.01131		139.4	-0.182922	-1.77102	-2.32756	1.42378
139.5	2.78522	-0.919907	-0.414795	0.54567		139.5	0.128296	-3.32786	-1.70443	4.84887
139.6	3.40798	-4.34483	0.519409	-1.32253		139.6	-0.183212	-2.08227	-1.39268	2.98049
139.7	-1.26273	-1.85355	-2.90572	0.857224		139.7	-0.806137	-5.19601	-1.70369	3.91455
139.8	2.78522	-1.5419	0.830917	-0.388229		139.8	-3.60869	-3.32766	0.164956	2.98031
139.9	4.96488	-0.9189	0.830978	-0.699509		139.9	-1.74055	-2.39345	-2.6371	2.98022
140	1.22831	-2.16415	-1.03725	1.79161		140	-2.36348	-5.19581	-2.32535	3.91427
140.1	5.27626	-2.16391	0.519714	1.16893		140.1	-3.29776	-6.44126	-2.63637	3.91418
140.2	9.94697	-2.16365	0.208389	2.10315		140.2	0.127274	-5.19567	-1.70186	0.488898
140.3	10.8811	-1.54065	-0.102921	0.857712		140.3	-1.74113	-5.50699	-2.01287	-1.0681
140.4	6.2104	-0.294861	-1.037	-0.0763397		140.4	-3.2982	-3.63863	-2.0125	1.11148
140.5	4.6535	-2.78566	-0.414185	0.235123		140.5	-2.05281	-3.63857	-1.078	3.60243
140.6	4.6535	-3.71954	1.76555	-1.01033		140.6	-2.36435	-4.88402	-0.766248	2.04543
140.7	1.85108	-1.85103	-1.03682	-0.0760956		140.7	-5.47829	-6.12948	-2.94555	2.97948
140.8	-2.19687	-0.60524	1.76567	0.546738		140.8	-4.23293	-3.63836	-0.454133	3.91353
140.9	2.78522	-0.29361	1.76575	1.48096		140.9	-7.03549	-3.01554	0.480377	1.11102
141	4.03074	-0.916122	0.831665	0.546906		141	-8.59254	-5.81789	-2.32168	2.04507
141.1	4.96488	-1.53864	-1.65933	0.546982		141.1	-5.1675	-7.99749	-1.69855	2.04497
141.2	4.34212	-1.53838	1.14316	2.10397		141.2	-6.10178	-3.32672	1.10424	2.66764
141.3	1.22831	-2.78365	3.01151	0.858536		141.3	-5.79056	-5.19493	-0.763677	2.35617
141.4	-2.19687	-4.02892	-0.41362	1.48137		141.4	-9.83864	-3.0152	-1.38607	3.91298
141.5	3.40798	-1.22624	1.45473	3.66113		141.5	-7.34775	-2.70375	-1.07432	2.04461
141.6	2.78522	-1.22598	0.209259	-0.69812		141.6	-2.67717	-5.50611	0.794328	2.66728
141.7	3.40798	-1.22574	1.14346	1.17023		141.7	-2.05457	-2.70362	0.171934	1.73304
141.8	1.5397	-1.53687	-0.724762	1.17032		141.8	-4.23439	-3.01493	0.795062	2.35571
141.9	-0.328587	-0.602478	-1.03607	0.859024		141.9	-3.30038	-4.88314	0.484049	2.04424
142	4.03074	1.57745	1.14365	0.236343		142	-3.61191	-3.63756	1.72994	0.798624
142.1	1.5397	-2.15887	-0.724579	0.859192		142.1	-6.72586	-3.32611	0.173403	1.10991
142.2	2.47384	0.0210419	-0.413132	0.547882		142.2	-7.34877	-0.212234	0.796531	1.10982
142.3	2.47384	-1.22423	1.14383	1.7935		142.3	-6.72615	-0.523546	-0.760005	2.66663
142.4	1.5397	-1.53535	-0.724396	1.17081		142.4	-3.30112	-3.32591	1.10865	2.66654
142.5	3.71936	-0.912354	1.14397	1.17088		142.5	-5.7923	-3.9486	1.73177	0.798164
142.6	2.16246	-1.22346	1.7668	0.548218		142.6	-8.59488	-3.01439	2.3549	3.6005
142.7	-4.9993	-1.53461	-0.412811	3.03934		142.7	-9.84055	-2.08018	-2.31544	2.66626
142.8	0.605553	-0.600204	2.07829	2.72804		142.8	-4.54721	-3.01426	0.487354	2.04341
142.9	-3.75378	0.0227966	-0.101303	3.97365		142.9	-1.43356	-3.63695	-0.757801	1.10918
143	-0.639969	1.57997	1.76704	2.10544		143	-2.36784	-1.7686	2.04499	2.97737
143.1	-1.57411	-1.22221	0.21019	2.10553		143.1	-1.43385	-2.70267	0.177075	2.97728
143.2	4.96488	-1.53334	1.76717	1.17146		143.2	-0.188461	-2.39123	1.11158	3.28857
143.3	2.78522	-1.5331	0.833084	2.41707		143.3	-1.74551	-2.39116	2.98024	0.486047
143.4	-0.639969	0.646835	3.0128	1.17163		143.4	-1.12291	-4.88213	2.35784	2.04286
143.5	1.22831	-0.287064	0.833206	1.17171		143.5	-8.28481	-3.32517	2.98097	2.04277
143.6	6.2104	-0.286804	0.833267	0.549026		143.6	-8.28496	-8.92995	1.73581	1.10853
143.7	6.2104	1.27034	-0.412201	3.66293		143.7	-2.36887	-2.07951	2.04756	1.10844
143.8	2.78522	-1.22044	1.45615	1.48334		143.8	-2.99178	-1.45668	0.491026	1.73111
143.9	4.03074	3.13913	1.76759	2.41756		143.9	-3.92606	-1.45661	1.73692	1.41964
144	2.16246	1.89386	1.45627	3.35179		144	-2.05792	-6.12725	0.491761	1.41955
144.1	2.16246	-0.596939	3.01323	0.238068		144.1	-1.12392	-1.76786	-0.442014	2.66498
144.2	-1.88549	2.51712	0.833649	2.10643		144.2	1.67836	-4.8816	1.42664	1.10798
144.3	2.47384	-1.21919	2.39061	1.79514		144.3	-1.12422	-1.14496	1.427	1.73065
144.4	6.2104	-0.596191	2.39067	3.35211		144.4	-4.23817	-2.39042	1.73875	2.35332
144.5	2.47384	0.338211	0.833832	0.86116		144.5	-3.30418	-3.94725	-1.37469	2.66461
144.6	3.71936	1.2726	0.833893	3.35228		144.6	-1.74741	-1.45614	2.36225	2.04176
144.7	4.34212	0.338715	-0.411575	2.7296		144.7	-2.05894	-3.32436	2.05123	0.48476
144.8	-2.19687	-3.08623	1.76816	3.04106		144.8	-4.55013	-3.94705	1.11746	2.66433
144.9	-5.31068	2.2075	3.32512	2.10699		144.9	-2.68199	-1.14456	2.67473	0.795957
145	-3.44239	1.58499	-0.722778	2.41847		145	-1.12523	-1.76725	3.60924	1.41863
145.1	-5.62206	1.89662	-0.411331	4.28683		145.1	0.742905	-5.50375	3.60961	0.484392
145.2	-2.50825	0.651352	1.14563	1.48448		145.2	-7.66454	-5.50369	2.36445	0.4843
145.3	-0.328587	1.58575	0.211548	1.17319		145.3	-7.97604	-3.63533	3.29896	0.484209
145.4	-5.62206	3.1429	1.45714	2.10741		145.4	-4.23964	-3.63527	4.23347	1.41826
145.5	-8.1131	0.963486	1.4572	3.04163		145.5	-3.617	-0.832773	2.98831	3.90921
145.6	-5.62206	2.20926	0.834503	1.7962		145.6	-4.5513	-0.521322	-1.05927	0.795313
145.7	-6.24482	0.963989	1.76871	2.41904		145.7	-7.04248	0.412884	-1.99304	0.48384
145.8	-3.44239	1.89838	2.39154	2.10773		145.8	-0.815033	-1.14395	-0.435771	0.172368
145.9	-9.67001	2.52139	1.45746	0.862305		145.9	0.430359	-2.38941	1.1215	0.483657
146	-12.4724	1.58751	3.94856	3.66481		146	2.60988	-2.70072	1.43325	1.41771
146.1	-6.24482	2.21053	1.45758	2.41937		146.1	5.10077	-3.94618	1.43361	-1.07343
146.2	-0.0172081	2.52214	3.01454	1.79669		146.2	3.8551	-3.63473	-1.36844	-1.3849
146.3	-4.06516	2.21103	1.4577	2.41953		146.3	3.85495	-4.25742	1.43435	-1.07361
146.4	-2.81963	3.45679	0.523621	5.22205		146.4	6.34586	-3.01183	3.92576	1.72872
146.5	-0.951347	1.27739	1.76921	2.73108		146.5	5.41156	-4.25728	1.43508	-0.139656
146.6	-1.26273	3.45729	2.39203	1.79701		146.6	-0.19342	-1.45479	0.81269	-0.762509
146.7	0.294174	2.52341	2.70346	1.7971		146.7	1.36333	-4.25715	0.501677	2.35121
146.8	-0.0172081	2.83504	1.76939	3.97684		146.8	-1.75063	-6.43675	1.1248	-0.139932
146.9	-1.88549	1.90115	2.70358	2.42003		146.9	-2.06215	-8.61634	3.9276	-0.140024
147	1.5397	0.655884	1.45813	2.73149		147	2.29703	-3.01143	2.68244	-0.762877
147.1	-1.57411	1.59029	0.524048	2.1088		147.1	-2.37383	-4.87964	2.06005	0.793934
147.2	0.916935	3.14743	3.32654	1.17474		147.2	-0.194305	-5.19096	3.9287	-0.140299
147.3	3.71936	2.21355	2.08107	4.28864		147.3	-2.68549	-3.01122	0.81526	-3.56558
147.4	1.85108	0.656891	2.70389	1.48628		147.4	1.67369	-2.69978	0.815628	0.170897
147.5	2.47384	0.0343781	2.08121	2.42052		147.5	1.98492	-4.87937	0.193234	-0.763337
147.6	1.22831	1.59154	1.7699	4.60025		147.6	1.6734	-0.831358	1.7505	-0.452048
147.7	-0.951347	1.28041	3.63823	-0.38176		147.7	0.427719	-2.69957	2.99639	-0.45214
147.8	-0.951347	0.346512	2.39278	1.798		147.8	-1.75208	0.725681	2.68538	-2.00914
147.9	-0.639969	1.5923	2.39284	3.04359		147.9	0.116043	-3.01082	0.506083	-0.452323
148	-5.31068	2.83806	-0.409531	-0.0701141		148	2.60696	-1.76523	1.75197	-1.38656
148.1	-6.5562	1.28142	1.45882	1.79825		148.1	2.91818	-2.07654	2.3751	-2.00941
148.2	1.5397	3.77271	2.08163	2.42108		148.2	0.427002	-3.94476	0.507185	-1.69812
148.3	0.294174	3.77296	-0.720734	1.17564		148.3	-0.195908	-5.5016	2.9986	0.48145
148.4	1.22831	0.659409	3.95004	0.552963		148.4	-2.99847	-5.19015	2.99896	2.03826
148.5	3.40798	2.52794	1.77045	2.10994		148.5	2.29485	-6.74698	3.93347	2.03817
148.6	0.916935	4.0851	1.77051	0.864517		148.6	1.67194	-3.32173	2.06556	1.10394
148.7	3.0966	2.52844	2.08194	1.17596		148.7	2.60594	-0.830616	3.31145	-1.07582
148.8	3.40798	2.84007	1.14786	3.6671		148.8	1.36026	0.726355	1.13215	-1.38729
148.9	2.78522	3.46309	0.836548	1.7989		148.9	-1.13092	-3.94429	0.509756	0.792279
149	4.03074	2.84058	-0.720306	1.17621		149	1.67136	-2.38732	-0.735399	3.28323
149.1	0.916935	3.15222	1.45944	0.864929		149.1	3.53949	-1.14173	0.821871	1.10348
149.2	1.5397	4.39798	1.77089	1.17638		149.2	6.96454	-2.0758	2.69052	-0.7649
149.3	1.85108	2.21858	1.14818	1.79922		149.3	6.34163	-2.69849	1.44537	1.10329
149.4	0.605553	2.5302	1.45963	0.242416		149.4	6.34148	-1.14153	0.200212	-0.142323
149.5	0.916935	4.39874	0.836929	2.11076		149.5	4.47304	-1.45284	-1.97909	-0.453795
149.6	0.916935	3.15347	2.70526	-1.00296		149.6	-1.44333	0.41551	0.200946	-2.01079
149.7	4.03074	0.97406	-2.58813	-1.31425		149.7	3.22723	-0.51856	-0.421448	-1.07674
149.8	1.5397	0.351547	3.01677	0.554108		149.8	5.40675	-2.0754	-1.35522	0.480071
149.9	-0.0172081	2.84285	1.77132	1.79973		149.9	3.8497	-3.00947	-1.04348	-2.01107
150	-1.57411	0.974808	-0.408295	1.48842		150	6.65199	0.415781	-1.97725	-0.765636
150.1	-0.639969	3.46611	3.63971	1.17711		150.1	3.22665	-3.6321	-0.731359	1.41394
150.2	0.294174	1.59808	5.19669	1.1772		150.2	9.7655	-3.00927	0.825911	0.479702
150.3	1.85108	6.26904	1.46017	1.17728		150.3	3.22636	-1.4523	2.38318	-0.45453
150.4	-1.26273	1.59859	-1.03081	2.73427		150.4	0.112396	2.59571	3.62907	0.479519
150.5	-0.328587	0.0419159	-0.719376	-1.3136		150.5	-0.821884	0.104736	0.515632	-0.143334
150.6	1.22831	1.91046	2.08311	1.80029		150.6	2.91454	-1.76348	-0.729523	-0.766188
150.7	-0.0172081	0.976562	1.14903	1.48898		150.7	3.22578	-1.76341	1.76189	-1.38904
150.8	-2.50825	2.53372	2.70601	0.554932		150.8	2.91425	-4.56577	-0.728789	0.16777
150.9	0.916935	2.2226	-0.40773	-0.379135		150.9	5.71654	-3.63156	0.828481	-0.766464
151	0.605553	2.53423	-0.719055	1.80063		151	9.14157	-0.829067	2.38575	2.03587
151.1	0.916935	1.60034	-0.0962219	0.866562		151.1	6.33899	-1.76314	0.829216	1.10164
151.2	1.85108	-0.579071	-1.34169	-0.690262		151.2	1.97952	-0.51755	0.206822	1.41293
151.3	4.96488	2.2236	-0.0960999	1.1781		151.3	2.91351	-1.76301	-0.415572	-1.07821
151.4	6.83317	1.28972	0.526718	0.244049		151.4	-0.823196	-0.517416	2.38722	-0.766923
151.5	4.03074	3.15825	-0.0959778	-0.378647		151.5	-1.13472	-2.38563	-0.414838	-1.38978
151.6	2.47384	0.356079	-1.34145	-1.3127		151.6	2.29033	-0.828663	-1.34861	0.167035
151.7	1.5397	-0.266434	-1.34138	-0.0670929		151.7	0.42189	-2.69688	-1.34825	2.03523
151.8	3.0966	1.60211	0.526962	1.4899		151.8	-1.44653	-2.38543	-0.725116	0.478231
151.9	3.40798	0.668213	0.215637	-0.689682		151.9	3.5354	-3.31951	-0.101988	-0.767383
152	1.22831	1.60262	2.08398	0.555908		152	1.66698	-1.13978	0.832521	1.10081
152.1	7.45593	1.91423	-1.65253	0.867386		152.1	6.02617	-1.45109	0.832888	1.72348
152.2	3.40798	-0.576553	-0.406937	-0.378067		152.2	2.60083	-2.38516	0.521875	0.166483
152.3	3.0966	2.22612	-0.406876	-1.31213		152.3	2.60069	-2.07371	0.210861	-0.144989
152.4	3.71936	-0.264664	0.215958	1.179		152.4	-1.44742	-0.828125	-0.722913	-2.32475
152.5	-0.0172081	0.0469513	1.77293	0.55632		152.5	-3.00446	1.66299	-1.96807	1.10035
152.6	4.03074	1.29274	-1.34082	0.867783		152.6	-1.13632	-1.45075	-0.0994177	-0.145265
152.7	0.916935	1.91574	-1.96352	1.17924		152.7	-0.513702	0.417599	0.835092	1.41155
152.8	-1.88549	0.981857	1.46173	-0.0661926		152.8	-1.75937	-2.07338	0.212698	2.03421
152.9	1.22831	1.60487	-1.02925	0.245285		152.9	-3.00505	2.90878	1.76997	-1.39106
153	-0.0172081	-0.574539	-1.65196	-0.688782		153	-1.1369	0.106421	-1.96623	0.165748
153.1	-3.44239	1.29399	-1.96327	0.556808		153.1	0.108459	1.04063	1.45932	-2.32539
153.2	-0.639969	0.0487213	0.527832	0.5569		153.2	-5.80791	1.97484	-1.9655	2.34523
153.3	2.78522	-2.13069	-1.02901	-1.62268		153.3	-0.825974	-1.1389	-1.65375	1.09961
153.4	2.78522	2.85165	-0.406189	0.868439		153.4	-3.31715	3.2205	-0.40786	1.09952
153.5	0.605553	0.672241	-1.65166	-1.31114		153.5	-5.49696	0.106758	0.526649	2.03357
153.6	6.52179	3.16354	-1.6516	0.55722		153.6	-2.38332	-4.2525	-0.718506	1.09934
153.7	2.78522	1.60689	-1.65154	0.557312		153.7	2.28726	-3.62967	-0.718139	0.165104
153.8	2.78522	0.361618	-1.96284	-3.17918		153.8	8.20334	-0.515799	0.21637	-1.39189
153.9	4.03074	1.91876	-0.405884	-0.376678		153.9	0.418686	-0.515732	0.839499	-0.769222
154	2.16246	1.29626	-1.02858	-2.55624		154	1.35268	-3.00671	-1.02842	2.34449
154.1	0.294174	-0.883163	-1.96265	-1.31065		154.1	2.59807	-3.6294	-1.33943	1.72164
154.2	2.78522	-0.260132	-1.65121	2.42599		154.2	5.40033	-1.76105	-0.404922	0.476025
154.3	-1.57411	0.985626	-1.96252	-1.62186		154.3	3.53191	-1.44961	-1.3387	1.09869
154.4	-0.639969	2.54279	-1.65109	-0.999023		154.4	-0.51619	1.66427	-0.715568	1.0986
154.5	1.5397	0.0519867	-4.14207	-0.37619		154.5	1.35194	-0.515327	-2.58349	1.09851
154.6	1.22831	-1.81604	-1.65097	-3.17853		154.6	-7.36685	-5.49735	-1.02621	2.9667
154.7	5.89902	-1.50441	0.217377	-0.998779		154.7	-8.30115	0.107567	-1.33723	3.27799
154.8	1.5397	0.364136	-1.65085	0.558212		154.8	-5.81024	-0.826508	-1.33686	1.40962
154.9	-1.88549	-1.19252	-2.8963	-2.24414		154.9	-5.18762	-1.4492	-2.8934	0.164001
155	-1.26273	2.23293	-1.9621	-0.998535		155	-6.43329	-3.6288	-4.44993	3.27771
155.1	-1.88549	0.0534973	-0.405136	-1.30983		155.1	-2.07411	0.730598	-2.2699	2.65486
155.2	-0.328587	-2.74866	-1.6506	-1.62112		155.2	3.53059	0.107903	-2.26953	3.27753
155.3	3.40798	-0.568756	-1.96191	-0.998291		155.3	-2.38579	4.4673	-1.64641	1.40915
155.4	4.6535	0.0542603	-2.896	-1.62096		155.4	-2.69731	1.04218	-3.20294	-0.45922
155.5	3.40798	-1.5024	1.77478	-1.30951		155.5	-3.00883	-2.69432	-5.69362	2.65449
155.6	4.96488	0.0547638	-3.20726	-0.37529		155.6	-1.76346	1.04232	-1.33392	2.03164
155.7	4.6535	2.23468	-1.65028	-1.62071		155.7	-4.25465	-1.13728	-0.399414	0.786026
155.8	7.76731	-2.12439	-1.02745	-0.997879		155.8	-7.36861	-3.31688	3.02614	2.34284
155.9	10.8811	-1.50139	-3.51843	-0.0636444		155.9	-7.9915	-2.38267	-0.398679	1.09722
156	5.89902	0.367157	-0.715958	-1.3091		156	-9.85994	2.59949	-2.57798	3.2768
156.1	3.40798	0.990158	-1.96141	-0.374878		156.1	-7.05765	1.97679	2.40448	3.2767
156.2	5.89902	-0.255096	-2.89549	-0.374786		156.2	-3.00986	2.911	1.47071	3.27661
156.3	4.03074	-0.566238	-2.89543	-1.30885		156.3	-0.518967	3.22245	-2.26549	3.27652
156.4	-1.57411	-1.18874	-1.64986	-0.0632477		156.4	-8.61501	0.420092	-2.57651	0.474001
156.5	3.71936	-0.254349	-1.96117	0.24823		156.5	-4.5672	-0.202602	-3.1989	3.8991
156.6	1.85108	-0.876862	-1.64973	-2.55412		156.6	-0.519394	-1.44806	-2.88715	2.65348
156.7	2.16246	-1.49937	-1.33829	-0.0629883		156.7	-3.01059	-4.25041	-2.57541	2.34201
156.8	-0.639969	-2.12189	-3.82927	1.1826		156.8	-0.208298	-2.07068	-1.32952	0.785015
156.9	-0.951347	-0.876114	-0.0926361	-0.685593		156.9	-3.32227	-1.75924	-1.64053	2.03045
157	4.6535	-2.43277	-0.715347	0.871399		157	-0.519989	-3.00469	-3.81983	2.03035
157.1	4.34212	-1.18698	-3.20633	-0.374054		157.1	0.725403	-1.7591	-3.1967	2.9644
157.2	0.294174	-2.43227	-2.89488	0.560165		157.2	-0.520279	-3.00455	-3.81909	2.96431
157.3	0.916935	-3.98891	-1.64931	0.560257		157.3	-0.831802	-4.56139	-1.95044	3.2756
157.4	1.5397	-0.563477	-1.64923	-1.93071		157.4	-2.07747	0.109385	1.78649	1.09584
157.5	-1.57411	-1.49736	-1.33778	0.56041		157.5	-3.32314	-1.13607	2.40962	1.09575
157.6	-0.328587	1.30531	-2.27187	0.24913		157.6	-0.209473	-2.6929	0.230325	1.09566
157.7	3.0966	-1.49686	-0.403519	-1.30771		157.7	-2.38928	-3.62698	-1.94897	1.09557
157.8	1.22831	-1.49661	-3.20589	0.872055		157.8	-1.14391	-1.75863	-0.703082	4.20928
157.9	1.85108	-2.4305	-1.64893	-1.61891		157.9	-1.76682	-1.75856	0.542808	4.20919
158	0.916935	-1.18472	-0.0919495	1.18358		158	1.03546	-0.51297	-2.88201	2.65219
158.1	-1.57411	-2.42999	-0.0918884	1.49506		158.1	2.59222	-0.201523	-1.9475	3.58625
158.2	3.40798	-2.11836	-1.96011	-1.61867		158.2	4.46036	-0.512835	-0.390233	3.58615
158.3	3.40798	-2.42949	-3.51695	0.561066		158.3	0.100876	-0.201389	-1.63539	2.02916
158.4	1.5397	-2.11786	-2.27138	0.561157		158.4	3.21455	-2.69237	-0.700879	-1.08474
158.5	1.22831	-2.74036	-1.95993	-0.0615234		158.5	0.723358	-1.1354	-1.94603	1.40621
158.6	4.6535	-3.0515	-1.6485	1.18408		158.6	-0.833694	-3.00361	-3.81395	1.40612
158.7	1.22831	-2.1171	-0.402908	-0.372742		158.7	2.59135	-3.00355	-2.25668	3.27431
158.8	-1.57411	-2.42824	-0.714233	0.250107		158.8	3.52533	1.66723	-2.87907	2.96284
158.9	-2.50825	-0.559692	-2.27107	0.872955		158.9	2.90244	-1.13513	-0.387662	2.33999
159	1.5397	-0.870834	-2.271	-0.0611115		159	5.08195	1.04461	3.34927	-0.773912
159.1	1.22831	-1.80472	0.531494	-1.30656		159.1	6.63872	-1.75775	-0.698308	2.96256
159.2	1.22831	-1.80447	-1.64812	1.49596		159.2	7.26132	-1.75769	-1.63208	3.58523
159.3	4.96488	0.0640717	0.531616	0.56189		159.3	2.59048	-3.00314	0.236568	3.89652
159.4	2.16246	-0.869827	0.531677	0.250595		159.4	0.722046	0.733496	-1.63135	3.89643
159.5	2.16246	-0.558182	-2.27069	-0.994843		159.5	-0.523621	-2.69162	0.237303	2.33944
159.6	-1.26273	0.998962	-1.64787	0.250763		159.6	-1.14653	2.60191	-2.25337	1.09382
159.7	-3.44239	-0.246292	0.53186	1.49637		159.7	2.58989	-3.62563	-0.696104	2.65063
159.8	-0.328587	-0.86882	-1.02498	2.43059		159.8	-1.76958	-4.55971	2.10669	2.96192
159.9	0.916935	-0.245789	-1.02492	0.251007		159.9	1.96683	-2.69135	-2.56365	4.51873
160	2.47384	-1.49107	-0.4021	1.18523		160	1.65532	0.111137	-0.695003	2.33898
160.1	-4.9993	-3.67047	-3.20447	1.1853		160.1	3.52344	1.97949	-0.383255	0.78198
160.2	-7.17896	-3.98161	-1.02473	3.36505		160.2	0.720886	-2.06839	-3.49669	0.470507
160.3	-0.951347	-2.42445	0.532227	1.18547		160.3	1.65488	0.42272	-3.49633	2.65008
160.4	-2.50825	-1.80145	-2.58151	-0.99411		160.4	4.76852	-3.31378	-1.00491	2.02723
160.5	1.85108	-1.80119	0.532349	0.562881		160.5	1.96596	-1.13405	-1.62731	2.6499
160.6	4.03074	-0.244034	-1.33588	1.4971		160.6	1.96581	-0.822599	1.17548	0.78152
160.7	3.0966	-0.243774	-1.95856	1.18579		160.7	0.0973816	0.111609	-1.31519	3.27247
160.8	4.34212	-0.554916	-1.33574	0.563126		160.8	4.14519	-0.199705	0.242077	2.64962
160.9	8.70145	0.379486	-1.64706	1.18596		160.9	1.65401	-0.822399	-1.31446	2.64953
161	5.27626	-1.17717	-0.71286	0.563278		161	5.7018	2.60286	-3.18237	2.02667
161.1	4.96488	-1.4883	2.40102	-1.92767		161.1	5.0789	-0.510881	0.243179	2.96072
161.2	4.03074	0.380234	-1.02411	1.49759		161.2	7.56979	1.04609	2.11183	2.02649
161.3	3.0966	-0.55365	-0.712677	0.874908		161.3	8.50378	-1.13351	-1.00161	1.40364
161.4	-2.50825	-2.73306	-1.02399	2.4319		161.4	3.83293	-0.199301	-0.0671005	1.71493
161.5	0.916935	0.692383	-0.401169	-0.370453		161.5	6.94659	-0.821995	0.244648	4.82864
161.6	-2.81963	-0.241516	0.533035	2.43207		161.6	2.27574	-3.31297	-0.0663657	2.96026
161.7	-1.57411	-0.552643	-1.33519	1.498		161.7	2.27559	-0.821859	0.245382	0.780509
161.8	-2.19687	-0.241013	-0.0895996	0.87532		161.8	1.34131	-0.51041	0.245749	0.469036
161.9	-2.81963	-1.48628	0.844604	0.875412		161.9	-1.77264	-4.24691	0.246117	2.64861
162	0.916935	1.005	-0.400864	3.98929		162	2.27516	-3.62408	-0.376277	2.64852
162.1	1.22831	-1.17439	-1.02356	1.49832		162.1	-4.57536	-1.75573	1.18099	2.02566
162.2	2.78522	0.382751	1.15616	-0.369873		162.2	-4.8869	-0.510139	2.73826	2.02557
162.3	2.47384	-3.04218	2.71312	1.49849		162.3	-5.5098	0.112686	0.247586	3.271
162.4	3.40798	-1.48503	0.533539	0.875824		162.4	-1.77338	-0.198627	0.247953	2.02539
162.5	2.78522	-3.04167	-0.400543	0.564514		162.5	-3.95319	1.98111	0.559701	1.40253
162.6	1.22831	0.383759	1.4678	2.12149		162.6	-5.19885	0.424269	-1.6196	2.64796
162.7	2.16246	-3.04117	2.71338	1.18744		162.7	-1.7738	-6.42604	-1.61923	1.71373
162.8	0.294174	-2.72954	1.46793	1.81029		162.8	2.89674	-3.31216	1.49494	1.40226
162.9	-0.639969	0.384506	0.533844	2.74451		162.9	7.25594	-2.06657	2.11807	2.33631
163	2.78522	-1.17213	-1.33438	1.49907		163	6.63303	-1.13237	3.05258	3.27036
163.1	4.96488	0.696396	2.40225	3.67882		163.1	1.96216	-4.2461	-1.61776	0.467841
163.2	2.47384	1.31941	2.71368	3.36751		163.2	1.96202	-3.00051	-0.0604901	3.89294
163.3	2.47384	-0.237244	1.46823	3.99036		163.3	1.96187	-4.24597	-0.682884	1.4018
163.4	2.16246	1.6313	-0.399994	-0.368896		163.4	-1.15207	-5.49143	1.49715	1.09033
163.5	3.40798	-0.23674	-0.0885468	1.81087		163.5	-5.20016	-1.13203	0.874754	1.40161
163.6	4.96488	1.32042	0.534271	2.4337		163.6	-1.15236	-0.82058	2.7434	0.778761
163.7	4.03074	1.63205	1.77986	1.18825		163.7	-2.39804	-2.06603	3.36653	-0.155472
163.8	3.71936	1.32092	-0.711136	3.05663		163.8	2.27252	-4.24563	1.81	1.08996
163.9	3.71936	1.00978	-1.64522	2.43394		163.9	3.20653	-2.0659	0.876223	2.33539
164	0.605553	1.63281	2.71419	1.18849		164	-1.46434	-1.75445	0.87659	1.40115
164.1	2.16246	-0.546616	0.845978	1.81136		164.1	-1.46448	-2.06576	1.8111	0.466921
164.2	3.0966	-0.23497	2.40294	1.81143		164.2	-3.33292	2.29363	0.565944	2.64649
164.3	1.22831	2.56769	1.78024	1.81151		164.3	-4.2672	-4.55668	0.877692	-1.09017
164.4	6.52179	2.56795	0.846161	3.67989		164.4	-5.51286	-3.93385	2.12358	2.02355
164.5	7.14455	1.32268	-0.399307	1.81168		164.5	-5.20161	-4.86792	2.12395	2.64622
164.6	5.89902	-1.16811	3.6487	3.05728		164.6	-3.64487	-2.37681	0.256032	2.64613
164.7	2.16246	2.88008	0.846344	3.68013		164.7	0.71431	-4.55641	1.19054	1.40051
164.8	5.58764	0.0779114	3.02606	1.50053		164.8	-2.08826	-3.31082	2.43643	1.40042
164.9	4.34212	2.88058	4.27165	3.99167		164.9	-3.02255	-5.49042	2.4368	0.466186
165	7.45593	2.25809	2.09204	2.74623		165	-3.33408	-2.68792	3.37131	-1.09081
165.1	4.96488	0.390045	1.46935	4.61458		165.1	-3.02284	-1.44233	2.43753	0.777382
165.2	1.5397	2.56996	0.535263	0.566727		165.2	-4.89127	-0.196741	3.68342	0.465909
165.3	4.03074	1.01331	0.223938	2.74648		165.3	-1.46623	-2.9991	5.24069	0.154437
165.4	2.78522	-0.231949	2.09229	3.05794		165.4	-0.532227	-4.24455	2.43863	-0.157035
165.5	0.294174	1.94795	1.46959	2.12387		165.5	-2.40067	-3.62173	3.06176	1.39978
165.6	1.5397	-0.542831	2.40379	1.1898		165.6	-2.40082	-3.31028	-0.363057	2.02245
165.7	-1.26273	2.57121	1.15834	1.81267		165.7	-2.71233	-3.62159	-0.362689	-1.71421
165.8	0.605553	2.2601	2.7153	2.12411		165.8	-0.221436	-4.24428	0.57182	-0.157403
165.9	3.0966	1.63759	2.09261	2.43558		165.9	2.58086	-2.06455	2.12909	2.64493
166	4.03074	0.392319	-0.398376	3.05843		166	1.64656	-3.31001	3.68636	-2.02587
166.1	-2.19687	1.63809	2.09273	1.5016		166.1	-3.02429	-4.55546	-0.04984	1.08784
166.2	-2.50825	0.704208	4.27246	1.81306		166.2	-3.6472	-4.5554	-1.91776	-0.157771
166.3	-1.57411	2.57272	3.33838	2.7473		166.3	-3.02458	-6.73499	1.19642	-0.780624
166.4	-3.75378	1.01608	1.78154	2.43599		166.4	-2.71335	-5.17802	4.31059	0.153426
166.5	-3.13101	0.704956	0.224686	2.74747		166.5	2.57997	-2.99829	3.06544	-0.469427
166.6	-1.57411	1.95073	2.09303	1.19063		166.6	0.400162	-2.68684	2.44304	-0.469519
166.7	2.78522	2.26236	2.40448	4.92728		166.7	0.400009	-4.86644	1.82065	0.775911
166.8	0.605553	1.01709	4.5842	3.37047		166.8	-1.77979	-5.17775	1.82101	-0.469703
166.9	-0.0172081	1.01733	0.536316	0.879501		166.9	2.26801	-6.42321	2.75552	1.08711
167	-1.26273	3.50864	2.71603	3.37062		167	2.57925	-2.99795	2.13313	0.152874
167.1	-0.639969	4.13165	3.33887	1.81381		167.1	1.33357	-1.1296	4.00178	-0.78136
167.2	-1.88549	1.64087	3.02754	1.19112		167.2	-2.40314	-1.7523	4.00215	0.46407
167.3	-1.88549	1.01834	1.15933	0.879837		167.3	-0.535004	-1.12947	3.06837	1.08674
167.4	-1.88549	-0.226913	0.536636	1.19128		167.4	-0.535156	-0.81802	0.577696	2.33217
167.5	-3.44239	1.95299	1.15945	1.81413		167.5	-4.27187	0.427568	-1.6016	0.152414
167.6	-6.5562	0.0849609	1.4709	2.1256		167.6	-5.20615	-0.817884	2.13533	-0.78182
167.7	-3.44239	2.57625	2.71648	1.19153		167.7	-5.20628	-2.06334	0.890178	0.463611
167.8	-3.75378	4.13342	4.58482	1.81438		167.8	-3.33817	-4.8657	2.44745	-0.159242
167.9	-4.68792	1.64262	-1.64273	1.1917		167.9	-6.4521	-1.75183	0.579532	-0.159334
168	0.294174	2.57701	-0.708527	1.19177		168	-3.02707	-4.55418	1.82542	-0.470807
168.1	3.0966	0.0862122	1.78259	2.12599		168.1	-4.58412	-1.44031	2.13717	-1.09366
168.2	2.78522	2.8889	1.78265	0.880569		168.2	-8.63222	0.739424	2.44892	-1.71651
168.3	4.34212	1.02086	-0.0855713	3.37169		168.3	-7.38684	-2.99708	0.26962	-2.02799
168.4	3.0966	2.57802	2.40553	2.12625		168.4	-5.83008	-3.61977	0.892749	3.26539
168.5	8.39007	-2.09244	3.96249	1.50357		168.5	-4.27333	-2.0628	3.07278	1.08564
168.6	5.27626	1.95576	0.537369	3.37193		168.6	1.33139	-4.2424	2.13901	0.774164
168.7	1.85108	4.44705	1.16019	1.50374		168.7	0.708481	-2.99681	1.51661	-0.47145
168.8	-0.328587	2.26765	0.848877	2.74934		168.8	3.19939	-0.817076	3.38526	0.151219
168.9	4.6535	2.2679	2.71721	0.258377		168.9	-0.848724	-2.37391	2.14011	0.773888
169	2.78522	3.20229	1.47177	1.81537		169	-6.45372	-2.37385	0.583572	1.70794
169.1	0.916935	1.64565	1.47183	2.4382		169.1	-7.388	-1.75102	-0.972964	3.57613
169.2	-0.328587	1.64589	1.16051	1.50415		169.2	-7.69954	-6.42166	2.45259	-1.71743
169.3	1.5397	3.20305	0.537811	1.19284		169.3	-5.20862	-5.48745	1.51882	-1.09476
169.4	4.03074	3.82605	0.226486	1.19292		169.4	-0.849457	-0.193911	0.896421	-0.472094
169.5	2.78522	1.02388	-1.95311	1.81578		169.5	-3.34064	-1.12799	1.51955	-1.09495
169.6	2.78522	0.712753	0.84938	1.50447		169.6	-1.78387	-5.17587	1.20854	-0.783659
169.7	1.5397	2.26991	1.4722	2.75008		169.7	-3.6523	-0.19371	0.586143	-1.40651
169.8	-0.0172081	2.58153	1.47226	1.81602		169.8	-2.09555	-1.43916	-0.970394	-0.472462
169.9	-2.81963	3.82732	0.538177	-0.986328		169.9	0.0839539	-0.193575	-0.970026	-0.161173
170	-3.44239	3.51617	3.02928	1.81618		170	0.0838165	-3.30732	-0.0355177	-2.02955
170.1	-2.19687	3.51643	0.5383	-0.363403		170.1	-0.227707	-3.30725	3.39004	-1.71826
170.2	2.78522	1.95978	-0.395782	1.19357		170.2	-2.71889	1.67491	3.3904	-1.40697
170.3	4.96488	0.403137	-0.707108	1.19366		170.3	-6.45561	-0.816067	2.14525	2.3295
170.4	4.96488	3.51718	0.538483	2.75066		170.4	-7.38989	-0.504616	1.52285	1.08389
170.5	1.5397	1.64917	2.09544	1.5052		170.5	-2.40796	3.23202	2.76874	-2.34139
170.6	5.58764	1.33803	2.40691	-0.985748		170.6	-3.65361	0.741039	1.21221	-1.71872
170.7	5.89902	0.404144	2.40697	0.259857		170.7	-7.07895	-4.55236	0.278434	2.01776
170.8	0.916935	1.96129	0.538742	-0.985596		170.8	-6.45634	-1.12711	1.8357	-0.784762
170.9	-0.0172081	1.65018	1.47295	0.571396		170.9	-7.07924	-2.37257	1.83607	-2.34176
171	5.27626	-0.217865	1.47301	1.50562		171	-6.14525	-2.06112	-1.27737	0.460576
171.1	3.71936	2.58481	-0.0838318	1.19431		171.1	-5.83401	1.05276	1.21404	2.64015
171.2	4.34212	-0.528748	-0.706543	0.57164		171.2	-2.0976	-2.06098	-0.965252	-1.40789
171.3	1.5397	1.3398	1.47319	-2.23071		171.3	-1.78635	-0.192631	1.52616	-0.473841
171.4	-1.26273	1.65143	1.47325	1.19456		171.4	5.06387	0.741579	-0.030376	-1.40807
171.5	-0.951347	1.02892	-1.01773	-0.67363		171.5	7.55476	1.98717	-0.0300088	-1.40817
171.6	0.294174	3.5202	2.40752	-0.362183		171.6	6.62048	0.118952	-1.27516	0.148644
171.7	5.27626	1.02942	-1.64038	0.883438		171.7	5.99757	-1.1265	-0.652035	0.459932
171.8	-0.951347	1.96381	1.16211	2.44041		171.8	7.24295	-2.37196	0.593854	2.6395
171.9	3.40798	0.0957794	0.228027	0.572205		171.9	4.129	-2.37189	-0.6513	0.459749
172	8.39007	1.03017	-1.32881	-0.361847		172	8.1768	-2.06044	0.594589	-1.40863
172.1	8.07869	0.407669	2.09644	-0.0503845		172.1	5.68561	-0.814854	0.283576	2.32785
172.2	5.58764	-0.837616	-0.0831604	1.50661		172.2	5.99686	-1.43755	0.283943	0.459473
172.3	5.89902	1.96507	0.851059	1.1953		172.3	8.48774	2.29909	-0.338451	-1.4089
172.4	3.40798	4.14499	-1.63994	1.50676		172.4	8.79897	2.92192	-0.649465	1.08205
172.5	3.71936	0.720062	0.851181	2.12961		172.5	8.79884	1.36508	1.53057	-0.163564
172.6	3.0966	0.720306	1.78539	-0.361359		172.6	1.32555	-0.191755	-1.27149	0.770486
172.7	4.34212	-0.213577	-1.32837	-1.6068		172.7	3.1937	0.431072	-0.0256019	1.08177
172.8	4.03074	-0.836105	-0.394165	-1.6067		172.8	1.94801	0.119759	-0.647995	-0.47522
172.9	4.03074	0.0982971	-2.57376	-0.0497284		172.9	-4.59111	-4.86226	2.1548	-0.475312
173	4.96488	3.21236	1.16286	0.261734		173	0.0794373	1.98818	-1.27002	0.770118
173.1	6.52179	-0.835342	1.4743	0.261826		173.1	3.50449	-0.81418	-0.335513	0.147264
173.2	1.85108	1.96733	-1.32806	0.573273		173.2	3.50433	-1.12549	-0.335146	-0.786969
173.3	0.916935	1.34483	-0.705246	-1.29492		173.3	3.19281	0.120096	-0.95754	1.08122
173.4	0.294174	1.34508	-1.9507	-1.29485		173.4	2.56992	-1.12536	0.28835	1.39251
173.5	3.0966	-0.522949	-1.01649	-0.0492401		173.5	-1.4782	0.431612	-1.57957	1.08104
173.6	-0.328587	-0.211319	0.540466	1.81914		173.6	-2.10109	-2.37075	-1.89058	0.146805
173.7	4.34212	3.21413	0.229141	-0.360458		173.7	-1.1671	-7.35277	-1.89021	-0.164668
173.8	4.6535	0.723328	-1.95045	-2.22867		173.8	3.19209	-2.68199	-1.88985	0.458002
173.9	1.85108	-1.1447	-2.26176	-0.671661		173.9	5.06023	-2.05916	-0.332575	0.45791
174	2.47384	2.28073	-0.704803	-1.29436		174	3.81456	-4.86152	-1.26635	2.3261
174.1	1.85108	-0.521439	-0.704742	-0.98288		174.1	2.88026	1.67754	-0.643221	-0.165035
174.2	8.39007	-1.45534	-1.32744	1.81963		174.2	5.37115	-1.4362	0.914049	0.769014
174.3	3.71936	-0.209549	-1.95013	2.44246		174.3	4.43687	-1.43613	-2.19939	-0.165219
174.4	3.40798	2.9045	-0.393173	-1.91678		174.4	6.92778	-0.813305	-2.19902	-1.09945
174.5	4.6535	-0.209045	1.47517	0.26297		174.5	6.92764	-1.436	-2.19866	1.3915
174.6	-0.328587	1.3481	-2.57271	-0.671097		174.6	5.0592	1.05511	-0.330005	1.08003
174.7	4.03074	-1.76546	-0.704376	-0.359634		174.7	6.30458	-3.30415	-0.0182571	3.88236
174.8	3.0966	-0.83107	-1.63846	-1.60507		174.8	7.86133	-1.12442	-3.44308	2.32537
174.9	1.22831	0.103333	0.852661	-1.29362		174.9	5.05876	0.743937	-0.640284	2.01389
175	-2.19687	0.414963	-2.88385	-0.670761		175	5.99277	1.67814	-0.951297	2.63656
175.1	4.96488	-0.207535	-0.392746	-0.982071		175.1	0.387756	0.744072	-3.13059	0.145426
175.2	4.34212	1.97237	-0.392685	1.19768		175.2	0.699005	1.67828	-3.44161	2.01362
175.3	7.76731	-2.69809	-1.01538	-0.981903		175.3	3.50127	0.432823	-1.57296	3.25905
175.4	8.39007	2.59563	-2.26085	-1.60458		175.4	8.79461	-1.43539	-1.57259	-0.477611
175.5	8.39007	-2.07483	-0.0811157	0.263794		175.5	0.387177	-1.12395	-3.75189	-0.477703
175.6	3.71936	-2.07457	-1.94933	0.575241		175.6	0.698425	-2.99216	0.91919	-0.166415
175.7	4.6535	2.59637	-3.50616	-0.358826		175.7	0.0755005	-2.05795	1.23094	3.25868
175.8	7.45593	0.105591	-1.9492	-1.60425		175.8	4.74606	1.99006	1.23131	2.32445
175.9	7.45593	0.105835	-1.63777	-1.60417		175.9	3.81178	0.433228	-0.325231	1.07883
176	7.14455	1.04024	-2.57184	-2.53822		176	3.18887	-1.43499	-1.25901	1.39012
176.1	7.14455	-1.45056	-3.50592	0.887039		176.1	3.50011	-3.30321	0.298265	2.32417
176.2	1.5397	-2.07306	-3.19449	-2.84946		176.2	0.386154	-1.12347	1.23277	1.70132
176.3	6.2104	-0.827301	-1.9489	-2.22661		176.3	-0.548126	-2.99169	-0.635142	2.32399
176.4	1.5397	-0.204269	-1.32608	1.82143		176.4	-1.17104	-5.48267	-4.05996	2.63528
176.5	-2.50825	-0.204025	-0.0804901	-0.0467834		176.5	-4.28499	-4.54846	-2.81407	1.07828
176.6	1.5397	-1.13791	-1.63734	-4.09464		176.6	1.31972	-3.30287	-2.19094	2.63509
176.7	6.83317	-1.76044	-2.8828	-0.358002		176.7	-2.72838	-1.7459	-2.81334	1.0781
176.8	6.83317	-4.87398	-0.080307	0.576218		176.8	-1.483	0.745216	-3.12435	0.455243
176.9	1.22831	-0.203018	-3.81682	-1.29198		176.9	1.94203	-4.23681	-1.2557	2.32343
177	3.40798	-0.514145	-0.0801849	0.265015		177	4.12157	-4.23674	-2.81224	-0.790463
177.1	3.71936	-0.513901	-1.94841	1.51062		177.1	-0.549301	-4.54805	-2.50049	2.32325
177.2	3.71936	0.109116	-2.25972	-0.980347		177.2	-1.79495	-4.54799	-3.12288	3.88006
177.3	5.89902	-0.513397	-0.391373	-1.29166		177.3	2.56422	1.6797	-2.81113	1.07754
177.4	8.70145	0.109619	-1.94821	-2.53708		177.4	2.2527	1.36838	1.23718	1.70021
177.5	4.34212	1.04401	-1.01401	-0.0459595		177.5	3.49806	-1.1226	-0.319355	2.0115
177.6	5.27626	-2.06953	-1.63672	-0.980026		177.6	1.94101	-2.05667	0.615155	2.32279
177.7	4.03074	-1.75792	-1.01389	-0.979935		177.7	1.31812	1.67996	-1.25276	2.01132
177.8	4.6535	-0.200745	-1.01382	1.1998		177.8	-1.17308	-0.811014	-1.2524	2.01123
177.9	4.96488	-0.823273	-2.57066	-1.29115		177.9	-1.4846	-5.17027	-0.317886	3.25666
178	0.294174	1.04527	0.854584	-0.0455475		178	0.694916	1.36879	-2.80856	3.87933
178.1	-0.0172081	-1.75691	-0.702271	-0.668228		178.1	0.694778	-2.67909	-1.56267	3.56785
178.2	1.85108	0.111633	-2.57048	0.266006		178.2	2.56291	-2.36765	-0.628164	4.81328
178.3	2.16246	-0.822266	-2.88181	-0.356689		178.3	-0.23967	-2.0562	-0.316417	3.25629
178.4	6.83317	-1.44476	-3.5045	1.20029		178.4	-1.48534	-4.2358	-0.62743	-1.10313
178.5	4.96488	-1.44452	-1.63617	-0.356522		178.5	0.0714111	-3.30159	-1.24982	-0.480462
178.6	4.34212	-0.821503	-1.32472	0.577698		178.6	6.61028	-3.6129	-3.42912	3.25601
178.7	1.5397	-3.62367	-0.701904	-0.0449829		178.7	3.49631	0.123734	-1.87185	1.07626
178.8	-1.26273	-3.62341	-2.57011	-0.0448914		178.8	-0.863159	-0.810341	-2.80563	2.01031
178.9	-0.951347	-2.37766	-0.390381	0.266571		178.9	-0.551926	-0.49889	-2.80526	1.07607
179	1.85108	1.04779	-1.01308	-2.2244		179	4.11865	-0.187445	-1.55937	-0.480921
179.1	-0.0172081	-2.99991	-1.01302	0.266739		179.1	3.80711	-1.12152	-1.24762	0.764509
179.2	-0.328587	0.425537	-2.25848	0.578186		179.2	3.1842	-1.74421	1.86655	0.453036
179.3	3.71936	-2.06526	-0.390137	-0.355865		179.3	5.36372	-1.74415	-1.55827	3.87813
179.4	7.14455	-2.99915	-1.94698	-0.978546		179.4	3.49529	-0.187176	0.621765	2.9439
179.5	4.96488	-1.75339	1.78966	0.889816		179.5	-2.42108	-2.36677	-0.62339	3.25519
179.6	-0.0172081	-0.196213	-0.389954	-1.28976		179.6	1.31534	-0.498419	-2.49131	2.63233
179.7	0.294174	-0.507355	-2.88094	-0.0441589		179.7	-0.553085	0.747169	-1.86818	2.63224
179.8	-1.26273	0.115662	-1.94673	2.13557		179.8	-2.73289	-3.30071	1.246	6.36872
179.9	2.16246	-1.44099	-0.389771	0.267395		179.9	-0.241989	-5.48031	-0.933302	3.25482
180	-2.81963	-0.817978	-2.258	1.2016		180	-0.864914	-1.12091	-0.932935	2.32058
180.1	-0.328587	-0.817734	-2.25793	1.20169		180.1	5.05118	-1.43222	0.935716	1.38635
180.2	-1.88549	-0.817474	-1.32373	0.267639		180.2	2.87137	-3.61182	-3.11186	1.07488
180.3	-1.57411	-0.81723	-1.32367	-0.355057		180.3	5.05089	0.436192	-2.48874	2.94307
180.4	-3.44239	-1.12834	-1.63499	-0.0435791		180.4	-2.42239	-2.05478	-0.620085	1.38607
180.5	-4.9993	-3.30777	-0.0780029	-0.66626		180.5	-4.91359	0.124947	-0.619718	2.63151
180.6	-4.68792	-5.1758	-0.700714	-0.0434265		180.6	-5.84787	-2.05465	-2.48763	2.63141
180.7	-3.44239	-2.06174	-0.0778809	-0.043335		180.7	1.93649	-1.43182	-2.17589	1.3858
180.8	-1.26273	-0.193192	-1.32335	0.579498		180.8	-1.17744	-3.30004	0.00414467	1.69709
180.9	0.294174	-2.06123	1.47914	0.57959		180.9	-1.80035	-4.85687	-0.618249	2.94252
181	4.03074	-1.7496	-1.01184	0.268295		181	1.93605	-4.54543	-2.79755	3.25381
181.1	3.0966	-0.815216	-0.700409	-0.354401		181.1	7.85214	-2.98845	0.316628	0.451289
181.2	2.78522	0.430573	0.856567	0.89122		181.2	4.4268	-2.36563	2.18528	2.63086
181.3	-0.0172081	-1.12608	4.59319	0.57991		181.3	9.40876	-2.98832	0.317362	1.38525
181.4	1.22831	-1.43723	0.545303	1.82552		181.4	7.22894	-2.67687	0.62911	2.94206
181.5	5.58764	0.119934	-0.388779	2.44836		181.5	4.11501	-2.36543	-0.304665	2.31921
181.6	1.22831	-1.12534	-0.0773315	0.891541		181.6	2.86932	-0.808455	-1.23844	4.1874
181.7	1.22831	-0.502319	0.856873	1.20299		181.7	2.24641	-1.11977	0.318831	2.31902
181.8	2.78522	0.743454	-2.56825	0.580322		181.8	1.93489	-5.47903	1.25334	1.07341
181.9	2.16246	-2.3701	-0.388535	1.51454		181.9	1.31198	-3.61068	1.87647	2.63022
182	3.0966	-2.68123	-0.69986	0.891876		182	0.0663147	-1.11957	0.631313	1.07322
182.1	7.14455	-1.74684	0.234344	1.20332		182.1	-0.867981	-3.29916	3.74549	0.450369
182.2	3.40798	-2.05797	-1.01109	2.44893		182.2	-1.49088	-0.496668	2.81171	2.00718
182.3	-2.19687	-1.43495	2.10277	1.82626		182.3	1.3114	-1.43074	-0.301727	1.38433
182.4	-0.639969	1.05634	-0.6996	-0.0419464		182.4	-0.245636	-6.10139	1.25554	3.5639
182.5	0.916935	0.433838	-0.076767	1.82642		182.5	0.0655823	-6.10132	0.321769	1.07276
182.6	3.40798	-1.12282	2.41434	0.892365		182.6	1.93372	-4.85573	2.81318	0.138529
182.7	-0.639969	-1.43394	1.79164	2.76073		182.7	-2.42575	-5.47842	-1.2344	1.38396
182.8	-1.57411	-1.4337	3.3486	0.581146		182.8	-0.557617	-4.54421	0.322871	3.56353
182.9	-3.13101	-3.92448	0.85762	4.00641		182.9	2.86743	-6.41243	0.945999	3.25206
183	-3.13101	-1.74458	0.546295	3.07234		183	2.24452	-5.16684	0.323605	4.18611
183.1	6.52179	-1.12155	0.546356	0.892776		183.1	0.687485	-4.85539	0.0125914	2.94049
183.2	4.6535	1.05835	0.546417	3.69528		183.2	0.687332	-2.0529	1.25848	2.31764
183.3	-0.328587	-1.43243	1.16924	3.07259		183.3	-0.86972	-5.47802	2.19299	1.07203
183.4	1.22831	-0.186661	0.546539	2.76131		183.4	-4.91782	-5.78933	1.5706	2.00608
183.5	5.27626	-0.809174	0.5466	-0.0410461		183.5	-1.80415	-4.85512	2.19373	0.137702
183.6	1.5397	1.37074	0.546661	2.45007		183.6	-11.1457	-2.67539	1.57133	2.31727
183.7	3.40798	-2.36557	1.48087	1.82741		183.7	-8.9662	-2.9867	0.948937	0.448898
183.8	-0.328587	1.37125	-0.0759583	2.13885		183.8	-3.05011	-2.67525	1.26068	1.07157
183.9	-3.44239	0.125977	1.16962	2.13895		183.9	-3.05026	-2.67519	1.26105	1.38286
184	-3.13101	1.68314	1.48106	0.893509		184	-3.98454	-6.72307	1.26142	2.62829
184.1	-5.93344	0.437866	1.79251	0.893585		184.1	-1.49365	-5.47748	3.13007	0.759911
184.2	-3.13101	-0.184647	0.858429	1.82782		184.2	1.9314	-4.54327	1.88492	0.448438
184.3	-5.31068	0.126984	0.85849	0.270996		184.3	0.374344	-4.23182	1.88528	2.00525
184.4	4.96488	0.75	2.10406	3.07349		184.4	0.685577	-3.60899	2.50841	2.62792
184.5	1.5397	1.06163	1.16998	0.893921		184.5	2.55373	-4.85445	0.640494	2.00507
184.6	0.916935	0.750504	2.72694	-0.0401459		184.6	1.61943	-4.85438	1.26362	-0.486071
184.7	2.78522	0.750763	-1.32094	3.07375		184.7	-4.60832	-2.36327	1.88675	-1.4203
184.8	4.6535	-0.805908	2.10431	2.45107		184.8	-4.91986	-1.74044	1.26436	-0.174874
184.9	2.78522	1.37402	2.10437	4.6308		184.9	-1.80618	-3.29728	3.44439	1.07056
185	2.47384	-0.494019	1.79306	3.07399		185	0.684708	-5.16549	1.88785	0.447702
185.1	4.6535	-1.73929	3.35002	3.07407		185.1	-1.49512	-4.23128	1.26546	0.44761
185.2	7.14455	0.440628	1.79318	2.45139		185.2	0.995789	-3.29708	2.51135	-0.798004
185.3	1.5397	1.06364	0.547714	2.45148		185.3	1.61841	-4.85391	4.38	0.447427
185.4	-4.9993	1.68666	1.7933	1.8288		185.4	-0.561401	-2.67418	5.62589	0.758716
185.5	-1.26273	3.24382	1.48199	2.76302		185.5	2.24088	-4.23101	4.69211	3.87243
185.6	0.294174	-0.492508	2.4162	2.14034		185.6	-4.92102	-1.7399	0.955914	2.9382
185.7	-0.0172081	-1.73778	1.7935	3.38594		185.7	-5.85532	-4.23088	-1.53476	-1.73261
185.8	2.78522	1.0649	3.35046	1.51775		185.8	-6.7896	-4.54219	0.645268	-1.7327
185.9	-0.328587	1.06516	1.17085	1.82921		185.9	-3.98732	-1.11694	0.957016	2.31516
186	-5.62206	-1.42564	3.35059	4.00894		186	-8.03542	-4.23068	3.13705	-0.487358
186.1	0.605553	1.06566	3.03926	2.45213		186.1	-5.8559	-2.36233	0.957751	0.446691
186.2	2.47384	-0.802383	2.10518	1.82945		186.2	-4.61052	-3.60778	-2.77845	-0.487542
186.3	4.6535	1.06616	2.10524	2.76367		186.3	-2.11961	-1.42805	-1.53256	0.446507
186.4	0.916935	2.93469	2.72806	2.14099		186.4	-3.05391	-1.42798	4.07266	-0.487726
186.5	3.40798	-2.66989	-0.385681	4.63211		186.5	-2.43129	-2.05067	3.76165	0.446323
186.6	1.22831	-1.11275	1.48267	4.00943		186.6	-3.36559	-0.805086	2.20511	-0.48791
186.7	7.45593	-1.42387	2.10548	2.14124		186.7	-3.36572	1.68603	1.8941	1.0689
186.8	4.34212	-0.800873	3.97383	-0.0383453		186.8	-1.1862	-1.73909	2.51722	2.00295
186.9	3.71936	1.06767	1.48285	1.51865		186.9	-3.05464	-3.60731	4.07449	1.3801
187	1.5397	1.69069	3.03981	1.51872		187	-2.43202	1.06347	3.14072	-0.176898
187.1	-0.0172081	2.62508	1.48299	2.76433		187.1	-4.61183	0.440773	3.14109	-1.11113
187.2	1.85108	2.31395	2.1058	-0.0380096		187.2	-3.98921	-1.11606	2.83007	-1.4226
187.3	5.58764	0.445923	1.79449	4.94415		187.3	-3.67798	-3.60704	1.8963	2.93663
187.4	0.916935	1.6917	3.66283	1.51904		187.4	-4.61226	-2.67283	1.27391	0.134115
187.5	0.294174	-0.799118	2.72874	1.83052		187.5	-2.43275	-2.05	-1.83953	-0.800119
187.6	0.605553	0.758057	0.549149	1.8306		187.6	-6.79222	-4.2296	-0.593644	-1.73435
187.7	4.6535	3.8721	2.72887	0.585159		187.7	-7.72652	-4.85229	1.58639	0.133839
187.8	1.85108	2.31546	2.10617	1.83076		187.8	-5.85838	-1.42704	1.27537	-0.800395
187.9	1.85108	0.758804	2.72899	3.07635		187.9	-7.41542	-0.804211	1.58712	-0.800487
188	-0.951347	2.62733	-1.63028	0.585403		188	-8.34972	1.06414	0.653348	-2.66886
188.1	-0.951347	-0.797607	-0.384689	0.58548		188.1	-5.85881	2.30973	2.522	-0.800671
188.2	-1.26273	0.448181	1.48366	1.5197		188.2	-4.61343	-0.492626	1.27684	-0.489381
188.3	-0.328587	2.31671	0.860962	2.45393		188.3	-3.36806	-1.4267	1.89997	-1.42362
188.4	0.605553	-1.4196	1.17239	2.14262		188.4	-0.254395	-0.803873	2.5231	2.62424
188.5	4.6535	2.93997	3.35213	1.20856		188.5	-2.74559	-0.181046	2.21209	2.62415
188.6	4.6535	3.25162	1.79529	1.52003		188.6	-3.05711	-0.803738	1.90107	-0.80113
188.7	0.916935	-1.10747	2.41811	0.897354		188.7	-3.05727	-1.73781	2.83558	-1.42398
188.8	-1.57411	0.449692	2.1068	3.0771		188.8	-6.79398	-1.42636	3.14733	-1.42408
188.9	-4.37654	0.449936	0.549957	3.69995		188.9	-7.1055	1.06475	0.656653	-1.42417
189	-4.9993	2.31848	-0.0727386	1.20897		189	-1.81216	-0.492086	-0.588502	3.24645
189.1	-6.24482	3.25287	2.41837	2.76598		189.1	-4.30338	-1.73755	0.968768	2.31222
189.2	1.22831	2.0076	1.1729	1.83191		189.2	-5.23764	-1.73748	0.657755	-1.73582
189.3	-2.19687	3.25337	-0.0725555	1.5206		189.3	-4.30367	-2.36017	0.969502	-2.67006
189.4	-0.328587	1.38535	0.550262	0.586548		189.4	-0.255859	-2.98286	0.347108	-0.490485
189.5	0.916935	1.38559	2.10722	1.52077		189.5	3.16919	-0.18037	1.90438	0.132184
189.6	3.0966	2.00861	2.41867	-0.0360413		189.6	0.677994	-0.180304	0.659224	-0.80205
189.7	2.16246	1.38609	2.41873	-0.035965		189.7	-1.81319	0.442524	2.83926	2.00028
189.8	4.03074	2.3205	-0.695023	1.20963		189.8	-3.05887	-1.73707	0.971339	-2.04776
189.9	4.6535	2.63211	2.73022	1.5211		189.9	-3.05901	-1.73701	0.660326	-2.04785
190	1.85108	4.81204	1.17339	0.587036		190	-3.05916	-3.60522	0.972073	-0.491036
190.1	-0.639969	2.32124	0.55069	0.275742		190.1	-4.6162	-1.11411	2.84072	0.443013
190.2	1.85108	-0.16954	-0.694778	2.1441		190.2	-6.79602	-0.491278	0.972808	1.37706
190.3	0.916935	-1.10344	1.48495	0.275909		190.3	-3.68236	-2.3595	1.59594	0.442829
190.4	0.294174	2.01062	0.550873	1.83289		190.4	-4.92802	-5.16186	3.77597	-1.42555
190.5	4.6535	-0.480179	0.550949	-0.0353088		190.5	-3.68265	-0.802458	2.84219	-1.73702
190.6	-2.50825	3.56802	-0.694519	2.45581		190.6	-2.74864	-3.29344	1.28566	-1.73711
190.7	-3.13101	1.38861	1.17383	1.21037		190.7	2.54468	-2.98199	0.351882	-1.7372
190.8	-0.0172081	0.454727	0.239746	-1.28059		190.8	-0.880661	-6.09573	0.35225	-2.98282
190.9	-1.88549	1.38911	-0.694336	1.8333		190.9	1.61024	-3.60461	0.663998	1.06504
191	-0.951347	2.32352	0.86264	-0.657654		191	-3.06061	-4.85007	1.28713	-1.73748
191.1	-3.13101	3.56927	0.551315	-1.28035		191.1	-5.5518	-1.7362	0.353352	0.130713
191.2	-3.13101	1.38988	-0.694153	0.276642		191.2	-9.28853	-4.53856	0.97648	-0.803521
191.3	-3.13101	1.39012	-0.694092	-0.0346527		191.3	-2.43829	-6.71815	0.354086	-2.36052
191.4	0.605553	1.07899	0.240112	-0.345963		191.4	-3.37259	-1.11323	1.2886	-2.36061
191.5	-5.31068	2.32477	-0.0711975	0.276901		191.5	-1.50444	-2.35869	0.977582	-2.67208
191.6	-3.75378	2.32503	-1.00528	-2.83684		191.6	-2.12735	-4.2269	1.28933	-0.803889
191.7	-2.19687	3.25941	1.48582	-0.0343323		191.7	-7.42096	-4.8496	0.0441742	0.130161
191.8	-0.0172081	3.25967	-0.382401	-0.0342407		191.8	0.674789	-2.98125	0.355922	1.99835
191.9	-1.26273	3.57129	-0.0709534	0.588593		191.9	-3.99608	-4.53808	0.0449085	-1.11555
192	-0.328587	2.01465	1.48601	0.588669		192	-1.50517	-1.11283	-1.20025	-1.42702
192.1	2.78522	1.39214	-0.070816	1.21152		192.1	4.4109	-1.73552	-2.13402	0.441174
192.2	4.03074	1.70378	-0.693527	-0.0339203		192.2	1.91972	-4.2265	-1.82227	1.37522
192.3	5.27626	2.94954	-0.693466	-1.90213		192.3	-1.19423	-3.60367	-0.265003	0.12961
192.4	-2.81963	1.08151	2.73178	-0.345139		192.4	-3.37404	-3.6036	0.669507	-2.05015
192.5	1.22831	2.95004	-0.381958	1.21184		192.5	-1.81728	-1.42387	-2.44393	-1.1161
192.6	2.16246	0.459259	-1.31604	-0.0335846		192.6	-1.81741	-0.801044	-1.19804	2.62038
192.7	6.2104	-0.163254	-1.00459	-0.656265		192.7	1.60762	2.62421	0.670609	0.129241
192.8	4.6535	-0.785767	0.552368	-1.59033		192.8	5.34402	-2.35781	-0.574547	-0.18223
192.9	7.76731	-0.474136	-1.00447	-0.0333405		192.9	-0.260956	-0.800842	1.91687	-1.11646
193	7.14455	2.01717	-1.3158	-0.967407		193	3.16408	-1.42353	-0.885193	1.37449
193.1	7.14455	-1.71916	-1.93849	-0.0331879		193.1	4.72084	-2.35761	0.360696	-0.805268
193.2	8.39007	0.46077	-0.692917	-0.967239		193.2	1.60689	-2.04616	0.361064	-0.80536
193.3	11.1925	1.70654	-0.692856	-1.27855		193.3	-1.19568	-1.11195	-1.19547	0.44007
193.4	11.1925	-0.47287	-0.692795	-1.27846		193.4	-1.81859	-0.800505	-2.12925	0.751359
193.5	13.6835	-2.65228	-0.381348	0.278534		193.5	-2.75287	-0.800438	-0.571976	1.06265
193.6	9.32421	1.70731	-1.31543	0.589981		193.6	4.40872	0.445152	-0.571609	-0.182966
193.7	12.438	0.462021	-1.93813	0.590073		193.7	0.983383	-3.91411	-1.50538	2.93075
193.8	10.5697	-0.471878	0.241608	-2.83504		193.8	-3.37608	-4.5368	-1.8164	1.68513
193.9	11.5039	0.151138	-0.692474	-0.0325317		193.9	-2.44209	-4.22535	-3.06155	1.68504
194	10.8811	-1.09413	-1.62656	1.21307		194	1.60573	1.37956	-1.81566	1.37357
194.1	10.5697	-1.40526	-0.380966	-0.0323639		194.1	2.85109	-2.04556	-1.8153	-0.183426
194.2	12.1266	-0.782257	-3.18333	0.901855		194.2	-1.81975	-1.42273	-0.880786	0.750624
194.3	10.8811	0.463531	-1.31499	0.590561		194.3	-5.86786	-1.73404	-0.569038	0.439151
194.4	1.85108	2.33206	-1.62631	0.902023		194.4	0.671005	2.93674	-3.3711	2.61872
194.5	3.40798	0.775421	-3.18315	0.590729		194.5	3.47327	0.445759	0.365838	0.438967
194.6	5.58764	-1.09262	-1.3148	-2.83438		194.6	1.29346	2.00273	0.366205	0.750256
194.7	3.40798	-2.96065	-0.0692139	0.27951		194.7	1.60471	1.06866	-1.19033	-0.183978
194.8	4.03074	-0.46936	-2.5602	-0.34317		194.8	2.22731	1.06872	-1.18996	1.99559
194.9	4.6535	-0.157715	-2.56013	-1.89999		194.9	4.09546	1.69155	-1.1896	2.61826
195	5.89902	-2.64851	-1.62595	-0.965775		195	2.22702	-2.66771	-3.05751	2.61817
195.1	5.89902	-1.40274	-3.49416	-1.27707		195.1	-0.575546	-2.04488	-2.123	3.24084
195.2	2.16246	-2.02525	-1.31444	-0.34285		195.2	-3.6895	2.00313	-3.36816	1.37247
195.3	1.5397	-5.45018	-1.93713	0.279999		195.3	-0.264465	2.93734	-2.74503	1.99513
195.4	-0.0172081	1.08905	0.553986	-0.654053		195.4	-2.44427	2.31465	-2.1219	0.74952
195.5	2.47384	-1.09035	-1.00285	-1.58812		195.5	0.0466156	-1.42185	-4.61258	0.126667
195.6	5.27626	-1.71288	-3.80522	0.591629		195.6	0.357864	-0.799023	1.30402	2.30624
195.7	7.14455	-1.40123	-1.00273	-1.58795		195.7	2.53738	-0.176195	2.23853	2.30615
195.8	2.47384	-0.778229	-0.0685272	-1.58788		195.8	1.29172	-1.42165	1.92752	0.749152
195.9	-1.57411	-2.33487	-3.80504	-3.45607		195.9	1.29156	2.31499	0.370979	0.126299
196	4.6535	-2.02324	-3.49359	-3.14462		196	1.91418	0.446768	-1.80832	1.99449
196.1	5.89902	-0.777466	-1.31387	0.592026		196.1	3.15956	1.38098	-1.80795	1.37164
196.2	5.89902	1.40245	-2.87071	0.592117		196.2	-0.577164	-0.175858	2.55175	4.48535
196.3	10.2584	-1.39972	-1.62514	-2.21024		196.3	0.356842	-1.42131	2.55211	1.99422
196.4	7.14455	-0.776718	-1.93645	-0.0304718		196.4	-0.577454	-1.10987	-1.18409	1.05998
196.5	8.70145	-2.02197	-3.80467	-1.5873		196.5	-4.93692	0.758488	-1.18372	2.30541
196.6	4.03074	-0.464828	-2.87047	-0.653076		196.6	-7.11673	-0.798349	-3.36302	1.37118
196.7	6.52179	-0.153183	-1.31351	-0.964371		196.7	-4.62582	-1.42104	-2.11713	2.30523
196.8	6.52179	-1.08708	-4.11588	-0.341537		196.8	-4.00322	2.00421	-3.0509	2.30514
196.9	4.34212	-2.95511	-0.0678558	1.52682		196.9	3.46977	0.447374	0.997413	-0.186001
197	5.27626	-2.02072	-1.31332	-1.89827		197	-0.889709	1.38158	-3.05017	2.61633
197.1	7.76731	-1.39771	-3.4929	-1.58681		197.1	2.53534	0.136129	-2.42704	1.37072
197.2	6.83317	-2.64297	-1.93594	-0.341217		197.2	1.60106	1.38172	-3.04943	3.23891
197.3	6.2104	-3.88824	-3.80417	-0.652496		197.3	0.0439911	2.93869	-1.49216	3.86158
197.4	7.45593	-3.888	-1.31306	-1.89795		197.4	0.35524	4.49566	0.376488	1.9932
197.5	1.22831	-2.01945	-3.80405	-0.0295715		197.5	0.355087	0.136398	-0.557286	1.37035
197.6	-0.951347	-1.70784	-2.86984	0.593262		197.6	1.60048	1.07061	0.377223	3.54992
197.7	2.47384	-2.64171	-0.378738	-1.27495		197.7	1.28894	2.00482	-0.245172	2.61569
197.8	6.52179	-1.08456	-2.86972	-0.0293274		197.8	0.666046	-0.797541	-0.556185	2.6156
197.9	9.94697	-2.95259	-0.690002	-1.58615		197.9	0.665894	-2.66576	-2.11272	4.48379
198	9.01283	-3.5751	0.555588	-0.340561		198	-1.8253	-2.97707	-1.17821	3.23817
198.1	6.2104	1.09586	0.244263	-0.0290833		198.1	2.53389	-2.04286	-2.42337	1.3698
198.2	3.40798	-1.70633	-1.62396	-2.20868		198.2	0.354065	-4.53384	1.00219	4.48351
198.3	5.89902	-2.95158	-1.31252	-0.963058		198.3	-0.891602	-1.73135	1.00255	3.54928
198.4	9.32421	-1.70583	-3.49211	0.593918		198.4	-2.13727	-0.485754	-2.11088	-1.4329
198.5	7.14455	-0.460037	-1.93515	-0.340149		198.5	-4.93983	-0.485687	-1.48776	-0.498852
198.6	11.1925	-1.70532	-2.86923	-1.58557		198.6	-1.82617	-3.28805	-0.553246	1.05796
198.7	11.5039	-3.57333	-2.55777	-0.339981		198.7	-4.00598	-5.15626	-4.28945	1.99201
198.8	7.45593	-1.39343	-0.689438	1.217		198.8	-8.36546	0.760036	-2.4208	3.8602
198.9	8.70145	0.163727	0.556152	-0.651184		198.9	-8.36562	-1.41956	0.0706158	2.92597
199	13.6835	-0.458786	-0.0665436	1.52855		199	-1.20399	-3.28778	2.56203	-0.499312
199.1	8.07869	-2.01543	-1.93477	-0.651031		199.1	1.2869	-3.59909	0.694112	-0.810786
199.2	7.45593	-3.57208	-3.49161	0.594574		199.2	1.90952	-4.22178	-1.79657	3.85983
199.3	3.0966	-0.458023	1.80193	-1.27364		199.3	-5.87515	-0.79653	-0.550676	2.30284
199.4	2.47384	-3.57158	-2.55734	0.283371		199.4	-4.94115	-0.796463	1.94074	4.17103
199.5	2.47384	0.165237	-0.689011	0.594818		199.5	-0.58197	-6.08987	-0.238561	0.74575
199.6	-0.328587	-0.145889	-1.31171	-2.83029		199.6	-2.13902	-3.91014	-0.549574	1.05704
[truncated: 19,503 more rows]
