# Supplementary material for: Functional implications of the exon 9 splice insert in GluK1 kainate receptors
Source: eLife. 2024 Nov 6;12:RP89755. doi: 10.7554/eLife.89755 (PMC11540303; doi:10.7554/eLife.89755)
Supplement: Figure 3—source data 1. [file elife-89755-fig3-data1.xlsx]

## Sheet: Figure 3
Figure 3A
GluK1-1a									GluK1-1a + Neto1										GluK1-1a + Neto2
10 mM Glu Desensitization (ms)	A1	Tau1	A2	Tau2	Mean-weighted ƮDes @ ≤100 ms				10 mM Glu Desensitization (ms)	A1	Tau1	A2	Tau2	Mean-weighted ƮDes @ ≤100 ms					10 mM Glu Desensitization (ms)	A1	Tau1	A2	Tau2	Mean-weighted ƮDes @ 100 ms
Cell 1	-22.4464	-14.9984	-344.108	6.41232	5.10121				Cell 2	5.35609	-50.039	-931.497	3.24083	3.54896					Cell 2	-1083.04	108.976	-396.844	11.0084	82.7051
Cell 2	-27.0132	12.0694	-127.339	3.87096	5.30577				Cell 3	-7.04081	50.6081	-499.8	3.21528	3.87364					Cell 4	-1510.18	100.686	-380.221	10.8136	82.6097
Cell 3	-259.987	3.09683	68.4794	0.893014	3.88487				Cell 4	121.175	21.0585	-4357.76	4.63587	4.16615					Cell 5	-1318.13	71.5416	-360.52	8.60343	58.0245
Cell 5	-74.8116	16.8756	-149.084	1.83956	6.86364				Cell 5	-96.5845	17.4141	-1821.07	2.24654	3.01047					Cell 6	-1784.09	119.552	-301.217	19.4202	105.088
Cell 10	12.4674	8.99137	-86.1439	3.4759	2.54258				Cell 6	84.9893	6.22876	-1806.57	2.287	2.09241					Cell 11	-824.318	58.8903	-279.292	9.72336	46.4476
Cell 11	29.5567	5.30963	-77.4597	4.32902	3.72397				Cell 7	-3522.96	2.61835	1619.98	0.847826	4.12557					Cell 12	-853.493	48.4723	-160.495	12.959	42.8512
Cell 12	-101.386	12.7399	-117.208	3.25451	7.65393				Cell 8	-60.0395	49.5298	-2418.47	2.59709	3.73399									Mean	69.6211
Cell 13	-3.01433	82.1056	-324.786	5.40114	6.10648				Cell 9	13.8921	-26.0118	-3342.08	3.53618	3.65951									SEM	9.97653
Cell 14	-77.7279	16.9706	-260.177	4.47846	7.35201				Cell 10	12.1233	-61.0297	-3173.91	3.54506	3.79266									N	6
Cell 16	16.5623	-30.7107	-786.265	3.02726	3.75323								Mean	3.55593
Cell 18	-33.3771	15.1036	-291.068	3.88752	5.04137								SEM	0.215244
				Mean	5.21173								N	9
				SEM	0.498636
				N	11
GluK1-2a									GluK1-2a + Neto1										GluK1-2a + Neto2
10 mM Glu Desensitization (ms)	A1	Tau1	A2	Tau2	Mean-weighted ƮDes @ ≤100 ms				10 mM Glu Desensitization (ms)	A1	Tau1	A2	Tau2	Mean-weighted ƮDes @ ≤100 ms					10 mM Glu Desensitization (ms)	A1	Tau1	A2	Tau2	Mean-weighted ƮDes @ 100 ms
Cell 1	148.559	6.83512	-472.082	4.94156	4.07205				Cell 1	-95.1445	48.309	-2235.5	3.13915	4.98313					Cell 1	-83.3771	24.9622	-136.555	8.85696	14.9625
Cell 2	3.97425	8.4892	-134.896	3.54713	3.39711				Cell 2	65.1261	-36.5133	-2615.53	3.69154	4.71819					Cell 2	-1537.73	40.4703	-438.859	7.56194	33.1637
Cell 3	-389.049	5.13747	20.6405	1.00941	5.36875				Cell 3	5.82933	-19.5526	-1489.86	2.38719	2.47337					Cell 3	-746.107	34.9527	-1012.57	6.15572	18.3726
Cell 4	8.96198	10.3397	-208.458	4.0929	3.81227				Cell 5	-1145.78	4.6102	255.149	0.987078	5.64816					Cell 6	-297.6	44.3155	-364.231	6.25755	23.3707
Cell 5	7.63405	-20.1908	-642.957	3.01711	3.29598				Cell 6	-1546.75	2.53118	620.171	0.838079	3.66439					Cell 7	-849.925	27.7265	-686.207	5.03911	17.5918
Cell 6	3.31539	27.5609	-671.702	3.35711	3.23705				Cell 8	-6824.97	2.64424	3383.87	0.850847	4.40781						-563.355	46.8965	-912.17	7.59068	22.5976
Cell 7	-960.101	2.92573	208.324	1.21849	3.39882				Cell 11	-60.043	70.5907	-2502.46	2.44611	4.04283									Mean	21.6765
Cell 13	-38.0588	15.0972	-364.049	3.2584	4.37892				Cell 12	-42.1781	132.385	-2678.49	2.62455	4.63621									SEM	2.63535
Cell 16	33.2402	6.18755	-415.221	2.65967	2.35267								Mean	4.32176									N	6
Cell 18	-1782.94	1.87416	969.151	0.751165	3.21155								SEM	0.337709
Cell 19	-2974.03	2.30697	471.223	0.812894	2.58827								N	8
Cell 20	-46.3117	53.129	-2563.56	2.64982	3.54557
				Mean	3.55492
				SEM	0.230575
				N	12
Figure 3B
GluK1-1a														GluK1-1a + Neto1																										GluK1-1a + Neto2
Recovery (s)	Cell 1			Cell 2			Cell 4			Cell 5				Recovery (s)	Cell 1			Cell 2			Cell 3			Cell 4			Cell 5			Cell 6			Cell 7			Cell 8				Recovery (s)	Cell 1			Cell 5			Cell 6
	Imax	I	%	Imax	I	%	Imax	I	%	Imax	I	%			Imax	I	%	Imax	I	%	Imax	I	%	Imax	I	%	Imax	I	%	Imax	I	%	Imax	I	%	Imax	I	%			Imax	I	%	Imax	I	%	Imax	I	%
0.5	414	55	13.285	226	30	13.2743	277	19	6.85921	216	18	8.33333		0.05				968	91	9.40083	672	74	11.0119	2955	349	11.8105	2251	200	8.88494	2002	50	2.4975	3231	311	9.6255	2616	205	7.83639		0.1	11819	4543	38.4381				3566	1213	34.0157
1	431	75	17.4014	264	56	21.2121	212	38	17.9245	197	34	17.2589		0.1	134	7.9	5.89552	961	158	16.4412	680	167	24.5588	3011	662	21.9861	2267	433	19.1001	2040	163	7.9902	3363	370	11.0021	2584	413	15.983		0.2				7023	2543	36.2096	3535	1198	33.8897
2	364	132	36.2637	243	81	33.3333	194	71	36.5979	154	67	43.5065		0.2				1001	292	29.1708	674	222	32.9377	3003	1157	38.5281	2234	721	32.2739	1974	284	14.387	3355	1068	31.8331	2625	667	25.4095		0.3	11211	4703	41.9499	6500	2399	36.9077	3491	1115	31.9393
3	412	196	47.5728	239	122	51.046	157	69	43.949	151	87	57.6159		0.3	124	38	30.6452	989	356	35.996	682	298	43.695	3069	1490	48.55	2216	923	41.6516	2046	504	24.6334	3363	1362	40.4996	2530	939	37.1146		0.5	10260	4301	41.9201	5779	2200	38.0689	3397	1035	30.4681
4	381	220	57.7428	215	159	73.9535	155	125	80.6452	145	97	66.8966		0.5	119	42	35.2941	995	488	49.0452	674	396	58.7537	3087	1829	59.2485	2196	1189	54.1439	1926	737	38.2658	3455	1903	55.0796	2650	2158	81.434		1	10090	4708	46.6601	5322	2182	40.9996	3480	1245	35.7759
5	395	256	64.8101	193	146	75.6477	157	129	82.1656	120	96	80		1	124	67	54.0323	980	724	73.8776	674	510	75.6677	3140	2335	74.3631	2239	1534	68.5127	1930	1133	58.7047	3570	2643	74.0336	2596	1628	62.7119		2	9092	4876	53.6296	4559	2274	49.8794	3293	1340	40.6924
6	372	253	68.0108	194	143	73.7113	160	129	80.625	127	108	85.0394		2	163	105	64.4172	968	895	92.4587	707	619	87.553	3151	2772	87.9721	2173	1970	90.6581	2025	1605	79.2593	3686	3321	90.0977	2632	2119	80.5091		3	7487	4498	60.0775	4126	2267	54.9443	3477	1500	43.1406
7	348	261	75	196	136	69.3878	137	111	81.0219	110	90	81.8182		3	140	123	87.8571	1040	981	94.3269	712	663	93.118	3354	3280	97.7937	2327	2131	91.5771	2086	1818	87.1524	3728	3467	92.9989	2634	2280	86.5604		4	7077	4608	65.1123	4215	2581	61.2337	3264	1598	48.9583
8	306	289	94.4444	195	164	84.1026	138	119	86.2319	91	83	91.2088		4	128	121	94.5312	936	925	98.8248	695	659	94.8201	3277	3187	97.2536	2349	2213	94.2103	2196	1910	86.9763	3920	3706	94.5408	2711	2500	92.2169		5	6364	4515	70.9459	3926	2636	67.1421	3124	1788	57.2343
9	325	300	92.3077	190	137	72.1053	126	124	98.4127	100	70	70		5	172	124	72.093	959	920	95.9333	690	656	95.0725	3181	3059	96.1647	2439	2313	94.8339	2001	1896	94.7526	4038	3907	96.7558	2844	2622	92.1941		6				4167	2084	50.012	3227	1949	60.3967
10	327	282	86.2385	180	130	72.2222	149	140	93.9597	77	76	98.7013		Tau Recovery (s)			0.98			0.72			0.58			0.58			0.66			0.95			0.59			0.39		7	5749	4370	76.0132	3969	2875	72.4364	3054	1961	64.2109
Tau Recovery (s)			5.89			2.31			3.32			2.6																									Mean	0.68125		8	5502	4404	80.0436				2946	2068	70.1969
											Mean	3.53																									SEM	0.070342		9	5488	4438	80.8673	2530	1928	76.2055	3310	2355	71.148
											SEM	0.814811																									N	8		10	5721	4595	80.3181	2828	2204	77.9349	3175	2406	75.7795
											N	4																												11	6005	4921	81.9484	3085	2532	82.0746	2962	2376	80.2161
																																								15	5411	5001	92.4228	2961	2545	85.9507	3003	2560	85.2481
																																								20	5772	5399	93.5378	2942	2678	91.0265	3012	2695	89.4754
																																								25	6252	6196	99.1043				2848	2755	96.7346
																																								Tau Recovery (s)			7.66			8.91			11.21
GluK1-2a																							GluK1-2a + Neto1																	GluK1-2a + Neto2
	Cell 3			Cell 5			Cell 6			Cell 7			Cell 8			Cell 9			Cell 10					Cell 1			Cell 2			Cell 3			Cell 5			Cell 6					Cell 2			Cell 4			Cell 7
Recovery (s)	Imax	I	%	Imax	I	%	Imax	I	%	Imax	I	%	Imax	I	%	Imax	I	%	Imax	I	%		Recovery (s)	Imax	I	%	Imax	I	%	Imax	I	%	Imax	I	%	Imax	I	%		Recovery (s)	Imax	I	%	Imax	I	%	Imax	I	%
0.3	368	114	30.9783							840	47	5.59524	1084	89	8.21033	1065	81	7.60563					0.1	3149	266	8.44713	3083	227	7.36296	2693	79	2.93353	1605	149	9.28349	1018	28	2.75049		0.05	2967	635	21.4021	856	97	11.3318	2510	477	19.004
0.5	384	111	28.9062	663	31	4.67572	595	50	8.40336	724	52	7.18232	1036	104	10.0386	1059	94	8.8763	1299	54	4.15704		0.2	2865	442	15.4276	3095	458	14.7981	2633	153	5.81086	1592	293	18.4045	1085	75	6.91244		0.1	3079	883	28.6781	876	174	19.863	2474	420	16.9766
1	405	103	25.4321	670	103	15.3731	692	140	20.2312	761	137	18.0026	1076	183	17.0074	1016	193	18.9961	1440	166	11.5278		0.3	2919	723	24.7688	3032	616	20.3166	2418	318	13.1514	1748	446	25.5149	1075	156	14.5116		0.2	3365	1004	29.8366	874	202	23.1121	2602	887	34.0892
2	416	139	33.4135	771	213	27.6265	791	192	24.2731	721	198	27.4619	973	334	34.3268	1068	333	31.1798	1396	333	23.8539		0.5	2882	1054	36.5718	3007	1036	34.4529	2374	452	19.0396	1732	707	40.8199	1085	219	20.1843		0.3	3400	1104	32.4706	930	207	22.2581	2525	946	37.4653
3	384	183	47.6562	691	256	37.0478	731	336	45.9644	755	293	38.8079	1032	431	41.7636	1100	517	47	1533	637	41.5525		1	2719	1673	61.53	2983	1683	56.4197	2305	1226	53.1887	1841	1279	69.4731	1086	601	55.3407		0.5	3282	1088	33.1505	918	235	25.5991	2700	1015	37.5926
4	415	220	53.012	693	377	54.4012	730	410	56.1644	723	354	48.9627	943	556	58.9608	1159	605	52.2002	1516	645	42.5462		2	2687	2148	79.9405	2860	2278	79.6503	2366	1401	59.2139	1898	1623	85.5111	1112	864	77.6978		1	3441	1162	33.7693	961	270	28.0957	2690	1000	37.1747
5	399	271	67.9198	653	435	66.6156	770	454	58.961	786	461	58.6514	1029	633	61.516	1133	698	61.6064	1618	1038	64.1533		3	2666	2318	86.9467	2840	2492	87.7465	2365	1661	70.2326	1962	1794	91.4373	1165	986	84.6352		2	3455	1351	39.1027	1011	323	31.9486	2631	1163	44.2037
6	382	263	68.8482	661	431	65.2042	787	592	75.2224	705	481	68.227	1171	791	67.5491	1176	856	72.7891	1769	1299	73.4313		4	2607	2383	91.4077	2698	2633	97.5908	2329	1868	80.2061	2023	1962	96.9847	1152	993	86.1979		3	3616	1597	44.1648	1008	368	36.5079	2706	1376	50.85
7	390	302	77.4359	635	461	72.5984	773	573	74.1268	801	570	71.161	1083	829	76.5466	1176	859	73.0442	1920	1436	74.7917		5	2700	2568	95.1111	2764	2677	96.8524	2373	1972	83.1016	2055	1982	96.4477	1139	1078	94.6444		4	3811	1864	48.911	1013	457	45.1135	2674	1518	56.7689
8	470	340	72.3404	618	479	77.5081	763	599	78.5059	796	626	78.6432	1055	866	82.0853	1013	859	84.7976	2120	1443	68.066		6	2700	2583	95.6667	2715	2674	98.4899	2278	2155	94.6005	2127	2088	98.1664	1174	1092	93.0153		5	3795	2017	53.1489	1043	571	54.7459	2672	1647	61.6392
9	470	383	81.4894	717	562	78.3821	745	631	84.698	767	628	81.8774	1187	968	81.5501	1116	908	81.362	2251	1879	83.474		Tau Recovery (s)			1			1.21			1.57			0.85			1.14		6	3249	1988	61.1881	1088	625	57.4449	2702	1765	65.322
10	407	317	77.887	804	628	78.1095	834	676	81.0552	849	701	82.5677	1337	1079	80.7031	1076	935	86.8959	2318	1979	85.3753																Mean	1.154		7	3258	2048	62.8607	1140	703	61.6667	2834	1940	68.4545
Tau Recovery (s)			7.64			4.14			4.72			6.35			4.64			5.39			5.31																SEM	0.120938		8	3037	2155	70.9582	1233	804	65.2068	2958	2095	70.8249
Mean	5.30667																																				N	5		9	2866	2160	75.3664	1194	848	71.0218	3007	2222	73.8942
SEM	0.50336																																							10	2692	2150	79.8663	1159	906	78.1708	3015	2295	76.1194
N	7																																							15	2760	2478	89.7826	1236	1044	84.466	3148	2650	84.1804
																																								20	2828	2637	93.2461	1407	1246	88.5572	2838	2549	89.8168
																																								25	2860	2676	93.5664	1369	1242	90.7232	3123	2934	93.9481
																																								Tau Recovery (s)			9.73			8.31			7.03
GluK1-1a																GluK1-1a + Neto1																							GluK1-1a + Neto2
	% Recovery							Relative amplitude									% Recovery											Relative amplitude
Time (s)	Cell 1	Cell 2	Cell 4	Cell 5	Mean	SEM	N	Cell 1	Cell 2	Cell 4	Cell 5	Mean	SEM	N		Time (s)	Cell 1	Cell 2	Cell 3	Cell 4	Cell 5	Cell 6	Cell 7	Cell 8	Mean	SEM	N	Cell 1	Cell 2	Cell 3	Cell 4	Cell 5	Cell 6	Cell 7	Cell 8	Mean	SEM		% Recovery									Relative amplitude
0.5	13.285	13.2743	6.85921	8.33333	10.438	1.66803	4	0.13285	0.132743	0.0685921	0.0833333	0.10438	0.0166803	4		0.05		9.40083	11.0119	11.8105	8.88494	2.4975	9.6255	7.83639	8.72394	1.15072	7		0.0940083	0.110119	0.118105	0.0888494	0.024975	0.096255	0.0783639	0.0872394	0.0115072		Time (s)	Cell 1	Cell 5	Cell 6	Cell 7	Cell 9	Mean	SEM	N	Cell 1	Cell 5
1	17.4014	21.2121	17.9245	17.2589	18.4492	0.932013	4	0.174014	0.212121	0.179245	0.172589	0.184492	0.00932013	4		0.1	5.89552	16.4412	24.5588	21.9861	19.1001	7.9902	11.0021	15.983	15.3696	2.34121	8	0.0589552	0.164412	0.245588	0.219861	0.191001	0.079902	0.110021	0.15983	0.153696	0.0234121		0.1	38.4381		34.0157	20.2415	3.94477	24.16	7.77287	4	0.384381
2	36.2637	33.3333	36.5979	43.5065	37.4254	2.15559	4	0.362637	0.333333	0.365979	0.435065	0.374254	0.0215559	4		0.2		29.1708	32.9377	38.5281	32.2739	14.387	31.8331	25.4095	29.22	2.89152	7		0.291708	0.329377	0.385281	0.322739	0.14387	0.318331	0.254095	0.2922	0.0289152		0.2		36.2096	33.8897	23.0503	6.80147	24.9878	6.70615	4		0.362096
3	47.5728	51.046	43.949	57.6159	50.0459	2.90965	4	0.475728	0.51046	0.43949	0.576159	0.500459	0.0290965	4		0.3	30.6452	35.996	43.695	48.55	41.6516	24.6334	40.4996	37.1146	37.8482	2.67493	8	0.306452	0.35996	0.43695	0.4855	0.416516	0.246334	0.404996	0.371146	0.378482	0.0267493		0.3	41.9499	36.9077	31.9393	23.6059	10.7486	29.0303	5.48214	5	0.419499	0.369077
4	57.7428	73.9535	80.6452	66.8966	69.8095	4.90472	4	0.577428	0.739535	0.806452	0.668966	0.698095	0.0490472	4		0.5	35.2941	49.0452	58.7537	59.2485	54.1439	38.2658	55.0796	81.434	53.9081	5.04605	8	0.352941	0.490452	0.587537	0.592485	0.541439	0.382658	0.550796	0.81434	0.539081	0.0504605		0.5	41.9201	38.0689	30.4681	24.3677	11.1111	29.1872	5.44345	5	0.419201	0.380689
5	64.8101	75.6477	82.1656	80	75.6559	3.8609	4	0.648101	0.756477	0.821656	0.8	0.756559	0.038609	4		1	54.0323	73.8776	75.6677	74.3631	68.5127	58.7047	74.0336	62.7119	67.7379	2.9259	8	0.540323	0.738776	0.756677	0.743631	0.685127	0.587047	0.740336	0.627119	0.677379	0.029259		1	46.6601	40.9996	35.7759	30.7445	19.3483	34.7057	4.6648	5	0.466601	0.409996
6	68.0108	73.7113	80.625	85.0394	76.8466	3.7561	4	0.680108	0.737113	0.80625	0.850394	0.768466	0.037561	4		2	64.4172	92.4587	87.553	87.9721	90.6581	79.2593	90.0977	80.5091	84.1156	3.27191	8	0.644172	0.924587	0.87553	0.879721	0.906581	0.792593	0.900977	0.805091	0.841156	0.0327191		2	53.6296	49.8794	40.6924	37.0673	26.7399	41.6017	4.77205	5	0.536296	0.498794
7	75	69.3878	81.0219	81.8182	76.807	2.90384	4	0.75	0.693878	0.810219	0.818182	0.76807	0.0290384	4		3	87.8571	94.3269	93.118	97.7937	91.5771	87.1524	92.9989	86.5604	91.4231	1.39512	8	0.878571	0.943269	0.93118	0.977937	0.915771	0.871524	0.929989	0.865604	0.914231	0.0139512		3	60.0775	54.9443	43.1406	46.7494	45.9662	50.1756	3.16018	5	0.600775	0.549443
8	94.4444	84.1026	86.2319	91.2088	88.9969	2.34819	4	0.944444	0.841026	0.862319	0.912088	0.889969	0.0234819	4		4	94.5312	98.8248	94.8201	97.2536	94.2103	86.9763	94.5408	92.2169	94.1718	1.24951	8	0.945312	0.988248	0.948201	0.972536	0.942103	0.869763	0.945408	0.922169	0.941718	0.0124951		4	65.1123	61.2337	48.9583	54.093	43.083	54.4961	3.99492	5	0.651123	0.612337
9	92.3077	72.1053	98.4127	70	83.2064	7.13973	4	0.923077	0.721053	0.984127	0.7	0.832064	0.0713973	4		5	72.093	95.9333	95.0725	96.1647	94.8339	94.7526	96.7558	92.1941	92.225	2.91671	8	0.72093	0.959333	0.950725	0.961647	0.948339	0.947526	0.967558	0.921941	0.92225	0.0291671		5	70.9459	67.1421	57.2343	57.0409	51.3889	60.7504	3.59558	5	0.709459	0.671421
10	86.2385	72.2222	93.9597	98.7013	87.7804	5.78709	4	0.862385	0.722222	0.939597	0.987013	0.877804	0.0578709	4																									6		50.012	60.3967	65.9505	56.3126	58.1679	3.36027	4		0.50012
																																							7	76.0132	72.4364	64.2109	69.8177	58.1213	68.1199	3.15492	5	0.760132	0.724364
																																							8	80.0436		70.1969	75.0511	66.5962	72.972	2.92522	4	0.800436
																																							9	80.8673	76.2055	71.148	74.0189	76.9565	75.8393	1.61222	5	0.808673	0.762055
																																							10	80.3181	77.9349	75.7795	82.7875	76.618	78.6876	1.28012	5	0.803181	0.779349
																																							11	81.9484	82.0746	80.2161	78.2253	74.9499	79.4828	1.33159	5	0.819484	0.820746
																																							15	92.4228	85.9507	85.2481	87.1849	94.6882	89.0989	1.88006	5	0.924228	0.859507
																																							20	93.5378	91.0265	89.4754	92.3921	98.0815	92.9027	1.46203	5	0.935378	0.910265
																																							25	99.1043		96.7346	94.3107	88.4783	94.657	2.28019	4	0.991043
GluK1-2a																					GluK1-2a + Neto1															GluK1-2a + Neto2
	% Recovery										Relative amplitude										% Recovery							Relative amplitude								% Recovery						Relative amplitude
Time (s)	Cell 3	Cell 5	Cell 6	Cell 7	Cell 8	Cell 9	Cell 10	Mean	SEM	N	Cell 3	Cell 5	Cell 6	Cell 7	Cell 8	Cell 9	Cell 10	Mean	SEM		Time (s)	Cell 1	Cell 2	Cell 3	Cell 5	Cell 6	N	Cell 1	Cell 2	Cell 3	Cell 5	Cell 6	Mean	SEM		Time (s)	Cell 2	Cell 4	Cell 7	Cell 8	N	Cell 2	Cell 4	Cell 7	Cell 8	Mean	SEM
0.5	28.9062	4.67572	8.40336	7.18232	10.0386	8.8763	4.15704	10.3199	3.20331	7	0.289062	0.0467572	0.0840336	0.0718232	0.100386	0.088763	0.0415704	0.103199	0.0320331		0.1	8.44713	7.36296	2.93353	9.28349	2.75049	5	0.0844713	0.0736296	0.0293353	0.0928349	0.0275049	0.0615552	0.0138688		0.05	21.4021	11.3318	19.004	19.1733	4	0.214021	0.113318	0.19004	0.191733	0.177278	0.022009
1	25.4321	15.3731	20.2312	18.0026	17.0074	18.9961	11.5278	18.0815	1.62521	7	0.254321	0.153731	0.202312	0.180026	0.170074	0.189961	0.115278	0.180815	0.0162521		0.2	15.4276	14.7981	5.81086	18.4045	6.91244	5	0.154276	0.147981	0.0581086	0.184045	0.0691244	0.122707	0.0249417		0.1	28.6781	19.863	16.9766	28.0383	4	0.286781	0.19863	0.169766	0.280383	0.23389	0.0293177
2	33.4135	27.6265	24.2731	27.4619	34.3268	31.1798	23.8539	28.8765	1.58548	7	0.334135	0.276265	0.242731	0.274619	0.343268	0.311798	0.238539	0.288765	0.0158548		0.3	24.7688	20.3166	13.1514	25.5149	14.5116	5	0.247688	0.203166	0.131514	0.255149	0.145116	0.196526	0.0254635		0.2	29.8366	23.1121	34.0892	33.595	4	0.298366	0.231121	0.340892	0.33595	0.301582	0.0253335
3	47.6562	37.0478	45.9644	38.8079	41.7636	47	41.5525	42.8275	1.56515	7	0.476562	0.370478	0.459644	0.388079	0.417636	0.47	0.415525	0.428275	0.0156515		0.5	36.5718	34.4529	19.0396	40.8199	20.1843	5	0.365718	0.344529	0.190396	0.408199	0.201843	0.302137	0.0445161		0.3	32.4706	22.2581	37.4653	34.2436	4	0.324706	0.222581	0.374653	0.342436	0.316094	0.0328405
4	53.012	54.4012	56.1644	48.9627	58.9608	52.2002	42.5462	52.3211	2.01484	7	0.53012	0.544012	0.561644	0.489627	0.589608	0.522002	0.425462	0.523211	0.0201484		1	61.53	56.4197	53.1887	69.4731	55.3407	5	0.6153	0.564197	0.531887	0.694731	0.553407	0.591904	0.0291312		0.5	33.1505	25.5991	37.5926	39.0285	4	0.331505	0.255991	0.375926	0.390285	0.338427	0.0301924
5	67.9198	66.6156	58.961	58.6514	61.516	61.6064	64.1533	62.7748	1.35945	7	0.679198	0.666156	0.58961	0.586514	0.61516	0.616064	0.641533	0.627748	0.0135945		2	79.9405	79.6503	59.2139	85.5111	77.6978	5	0.799405	0.796503	0.592139	0.855111	0.776978	0.764027	0.0448976		1	33.7693	28.0957	37.1747	44.9046	4	0.337693	0.280957	0.371747	0.449046	0.359861	0.0351337
6	68.8482	65.2042	75.2224	68.227	67.5491	72.7891	73.4313	70.1816	1.38075	7	0.688482	0.652042	0.752224	0.68227	0.675491	0.727891	0.734313	0.701816	0.0138075		3	86.9467	87.7465	70.2326	91.4373	84.6352	5	0.869467	0.877465	0.702326	0.914373	0.846352	0.841997	0.036591		2	39.1027	31.9486	44.2037	50.6085	4	0.391027	0.319486	0.442037	0.506085	0.414659	0.0395018
7	77.4359	72.5984	74.1268	71.161	76.5466	73.0442	74.7917	74.2435	0.837456	7	0.774359	0.725984	0.741268	0.71161	0.765466	0.730442	0.747917	0.742435	0.00837456		4	91.4077	97.5908	80.2061	96.9847	86.1979	5	0.914077	0.975908	0.802061	0.969847	0.861979	0.904774	0.0329867		3	44.1648	36.5079	50.85		3	0.441648	0.365079	0.5085		0.438409	0.0414335
8	72.3404	77.5081	78.5059	78.6432	82.0853	84.7976	68.066	77.4209	2.13907	7	0.723404	0.775081	0.785059	0.786432	0.820853	0.847976	0.68066	0.774209	0.0213907		5	95.1111	96.8524	83.1016	96.4477	94.6444	5	0.951111	0.968524	0.831016	0.964477	0.946444	0.932314	0.0256515		4	48.911	45.1135	56.7689	57.7508	4	0.48911	0.451135	0.567689	0.577508	0.521361	0.0306465
9	81.4894	78.3821	84.698	81.8774	81.5501	81.362	83.474	81.8333	0.743726	7	0.814894	0.783821	0.84698	0.818774	0.815501	0.81362	0.83474	0.818333	0.00743726		6	95.6667	98.4899	94.6005	98.1664	93.0153	5	0.956667	0.984899	0.946005	0.981664	0.930153	0.959878	0.0104571		5	53.1489	54.7459	61.6392	63.9706	4	0.531489	0.547459	0.616392	0.639706	0.583762	0.026212
10	77.887	78.1095	81.0552	82.5677	80.7031	86.8959	85.3753	81.7991	1.29128	7	0.77887	0.781095	0.810552	0.825677	0.807031	0.868959	0.853753	0.817991	0.0129128																	6	61.1881	57.4449	65.322	65.4896	4	0.611881	0.574449	0.65322	0.654896	0.623611	0.0191703
																																				7	62.8607	61.6667	68.4545	73.0073	4	0.628607	0.616667	0.684545	0.730073	0.664973	0.0262633
																																				8	70.9582	65.2068	70.8249	74.7998	4	0.709582	0.652068	0.708249	0.747998	0.704474	0.0197507
																																				9	75.3664	71.0218	73.8942	77.8086	4	0.753664	0.710218	0.738942	0.778086	0.745227	0.0141893
																																				10	79.8663	78.1708	76.1194	75.2493	4	0.798663	0.781708	0.761194	0.752493	0.773515	0.0103813
																																				15	89.7826	84.466	84.1804	95.4799	4	0.897826	0.84466	0.841804	0.954799	0.884772	0.0266605
																																				20	93.2461	88.5572	89.8168	92.8372	4	0.932461	0.885572	0.898168	0.928372	0.911143	0.0114511
Figure 3C																																				25	93.5664	90.7232	93.9481	90.5652	4	0.935664	0.907232	0.939481	0.905652	0.922007	0.00902623
GluK1-1a																GluK1-1a + Neto1														GluK1-2a + Neto2
Glutamate Dose Response			% Maximal current													Glutamate Dose Response			% Maximal current											Glutamate Dose Response			% Maximal current
Log [M]	Concentration [M]	Concentration [µM]	Cell 2	Cell 3	Cell 4	Cell 5	Cell 6	Cell 7	Cell 8	Cell 9	Mean	SEM				Log [M]	Concentration [M]	Concentration [µM]	Cell 1	Cell 2	Cell 3	Cell 4	Cell 5	Cell 6	Mean	SEM				Log [M]	Concentration [M]	Concentration [µM]	Cell 2	Cell 3	Cell 4	Cell 5	Mean	SEM
-4	0.0001	100	10.559	10.0709	9.70874	19.5122	19.0722	17.1533	14.1631	17.1946	14.6792	1.45337				-6	1e-06	1	0	0	0	0	0	0	0	0				-6	1e-06	1	0	0	0	0	0	0
-3.69897	0.0002	200	24.7205	19.4326	27.1845	25	30.6701	29.927	23.6052	33.9367	26.8096	1.62505				-5.52288	3e-06	3	4.7619	0.582524	0.537634	1.21951	0.763359	0	1.31082	0.708626				-5.52288	3e-06	3	6.469	21.1988	9.33333	5	10.5003	3.67792
-3.52288	0.0003	300	35.1553	33.4752	41.7476	39.6341	29.6392	0	38.6266	48.8688	33.3933	5.18917				-5	1e-05	10	13.0952	6.31068	1.07527	3.65854	4.96183	3.46939	5.42849	1.69013				-5	1e-05	10	14.5553	29.2398	14.6667	10	17.1154	4.18509
-3.39794	0.0004	400	44.472	40.9929	49.5146	54.2683	53.866	36.8613	43.7768	52.4887	47.0301	2.28375				-4.69897	2e-05	20	25	24.2718	11.828	4.87805	6.10687	5.10204	12.8645	3.86513				-4.69897	2e-05	20	19.9461	42.6901	24	16	25.659	5.90722
-3.30103	0.0005	500	64.0994	59.1489	57.2816	71.3415	66.2371	50.365	55.794	58.8235	60.3864	2.32672				-4.52288	3e-05	30	29.7619	43.6893	37.6344	42.6829	52.6718	6.12245	35.4271	6.6182				-4.52288	3e-05	30	39.8922	55.5556	30.6667	48	43.5286	5.34863
-3.1549	0.0007	700	91.1801	72.766	75.7282	90.2439	102.062	67.1533	84.5494	100	85.4603	4.5009	N	8		-4.22185	6e-05	60	98.2143	100	90.3226	89.6341	66.4122	36.7347	80.2197	9.97891				-4.22185	6e-05	60	71.4286	84.3567	64	72	72.9463	4.21736
-3	0.001	1000	100	93.617	100	100	96.3918	100	90.9871	83.7104	95.5883	2.09011	EC50	379.3 ±52 μM		-4	0.0001	100	97.619		80.6452	86.5854	75.5725	66.3265	81.3497	5.25201	N	6		-4	0.0001	100	95.6873	93.5673	86.6667	80	88.9803	3.5593	N	4
-2.69897	0.002	2000	93.4161	100	78.6408	96.3415	100	95.6204	100	100	95.5024	2.57147	Hill's slope	2.1		-3.52288	0.0003	300	99.4048		94.086	100	77.0992	100	94.118	4.39764	EC50	39 ±10 μM		-3.52288	0.0003	300	99.7305	97.5146	96	86	94.8113	3.03532	EC50	34 ± 8 μM
																-3	0.001	1000	100		100	82.9268	100	87.7551	94.1364	3.67097	Hill's slope	2.4		-3	0.001	1000	100	100	100	100	100	0	Hill's slope	1.6
Figure 3D
GluK1-1a					GluK1-1a + Neto1					GluK1-1a + Neto2
Kai efficacy	10 mM Glu	1 mM Kai	IK/IG		Kai efficacy	10 mM Glu	1 mM Kai	IK/IG		Kai efficacy	10 mM Glu	1 mM Kai	IK/IG
Cell 10	109.68	134.23	1.22383		Cell 1	121.32	169.55	1.39754		Cell 2	2779.8	3199	1.1508
Cell 11	77.29	154.96	2.00492		Cell 2	663.98	813.44	1.2251		Cell 4	3828	3839	1.00287
Cell 12	425.19	735.71	1.73031		Cell 3	632.38	804.25	1.27178		Cell 5	3041.3	3368.3	1.10752
Cell 13	496.85	738.11	1.48558		Cell 4	3514	4940	1.40581		Cell 6	2769	3031	1.09462
Cell 14	306.95	433.6	1.41261		Cell 5	2423	2962	1.22245		Cell 7	1331.8	1594	1.19688
Cell 15	244.84	475.35	1.94147		Cell 6	1913	2295	1.19969		Cell 9	702.8	964.65	1.37258
Cell 17	484.9	462.25	0.953289		Cell 7	2662	3135	1.17769		Cell 11	1804	872	0.48337
Cell 18	278.25	361.89	1.30059		Cell 8	2968	3230	1.08827		Cell 12	1733	1472	0.849394
		Mean	1.50657				Mean	1.24854		Cell 13	1439	1310	0.910354
		SEM	0.128543				SEM	0.0382185		Cell 14	1323	1439	1.08768
		N	8				N	8		Cell 15	979.7	1169	1.19322
										Cell 16	1095	975.8	0.891142
										Cell 17	10203	7186	0.704303
												Mean	1.00344
												SEM	0.0651734
												N	13
GluK1-2a					GluK1-2a + Neto1					GluK1-2a + Neto2
Kai efficacy	10 mM Glu	1 mM Kai	IK/IG		Kai efficacy	10 mM Glu	1 mM Kai	IK/IG		Kai efficacy	10 mM Glu	1 mM Kai	IK/IG
Cell 5	653.64	521.14	0.797289		Cell 1	2654	6192	2.33308		Cell 2	3057	3529	1.1544
Cell 6	931.25	364.57	0.391485		Cell 2	2404	2990	1.24376		Cell 3	361.9	486.74	1.34496
Cell 7	950.6	517.66	0.544561		Cell 3	1981.2	2232.8	1.12699		Cell 7	2430	2861	1.17737
Cell 8	1302.4	633.37	0.48631		Cell 4	1984.2	2050	1.03316		Cell 8	2285	2313	1.01225
Cell 9	1279.31	661.1	0.516763		Cell 5	1416.8	2225	1.57044		Cell 12	1780	1897.2	1.06584
Cell 10	1009.1	467.03	0.462818		Cell 7	6936.1	7982	1.15079		Cell 13	1719.1	1939	1.12792
Cell 11	1074.5	462.77	0.430684		Cell 8	5112.9	7867.5	1.53875		Cell 14	1269.8	1690.8	1.33155
Cell 13	492.62	426.51	0.865799		Cell 10	4778	5492	1.14943		Cell 15	1138.4	1188.2	1.04375
Cell 15	430.78	311.36	0.722782		Cell 12	2881.7	3073	1.06638				Mean	1.15725
Cell 16	475.57	307.09	0.64573		Cell 13	2046.1	3034.79	1.48321				SEM	0.0441486
Cell 17	417.98	247.38	0.591846				Mean	1.3696				N	8
Cell 18	3154	1645	0.52156				SEM	0.124111
Cell 19	3109	1475	0.474429				N	10
Cell 20	2887	1449	0.501905
Cell 21	2927	1382	0.472156
		Mean	0.561741
		SEM	0.0356324
		N	15
Figure 3E
GluK1-1a					GluK1-1a + Neto1					GluK1-1a + Neto2
Rectification index	I -90 mV	I 90 mV	I 90 mV/I -90 mV		Rectification index	I -90 mV	I 90 mV	I 90 mV/I -90 mV		Rectification index	I -90 mV	I 90 mV	I 90 mV/I -90 mV
Cell 2	234.83	216.72	0.92288		Cell 1	196.42	300.98	1.53233		Cell 6	3396.3	2419.54	0.712405
Cell 4	211.49	150.1	0.709726		Cell 2	1489.39	1466.14	0.98439		Cell 7	1933.82	1783.67	0.922356
Cell 5	115.82	114	0.984286		Cell 3	1175.04	1463.06	1.24512		Cell 9	865.39	727.4	0.840546
Cell 14	349.72	434.56	1.24259		Cell 4	4680.94	4766.2	1.01821		Cell 10	658.3	485.72	0.73784
Cell 15	306.25	444.7	1.45208		Cell 5	2907	3915.76	1.34701				Mean	0.803287
Cell 16	986.7	628.91	0.637387		Cell 6	2948.69	3226	1.09405				SEM	0.0483981
Cell 17	754.5	574.74	0.76175		Cell 7	5254.53	4607.1	0.876786				N	4
		Mean	0.958672				Mean	1.15684
		SEM	0.112332				SEM	0.0867781
		N	7				N	7
GluK1-2a					GluK1-2a + Neto1					GluK1-2a + Neto2
Rectification index	I -90 mV	I 90 mV	I 90 mV/I -90 mV		Rectification index	I -90 mV	I 90 mV	I 90 mV/I -90 mV		Rectification index	I -90 mV	I 90 mV	I 90 mV/I -90 mV
Cell 2	190.5	179	0.939633		Cell 2	4162.9	4281.95	1.0286		Cell 2	3988.95	4627.5	1.16008
Cell 3	409.4	398.98	0.974548		Cell 5	2529.9	2471	0.976718		Cell 7	3794.84	5520.21	1.45466
Cell 5	679.85	356.24	0.523998		Cell 6	1523.2	2162.1	1.41945		Cell 8	2949.57	4397.74	1.49098
Cell 6	754.3	520.65	0.690243				Mean	1.14159				Mean	1.36857
Cell 10	1274.86	404.2	0.317054				SEM	0.139734				SEM	0.104772
Cell 11	963.52	392	0.406842				N	3				N	3
Cell 12	847.01	345.91	0.40839
		Mean	0.608672
		SEM	0.10037
		N	7
Figure 3F
GluK1-1a											GluK1-1a + Neto1											GluK1-1a + Neto2
	IV Plot											IV Plot											IV plot
mV	Cell 2	Cell 4	Cell 5	Cell 14	Cell 15	Cell 16	Cell 17	Mean	SEM		mV	Cell 1	Cell 2	Cell 3	Cell 4	Cell 5	Cell 6	Cell 7	Mean	SEM		mV	Cell 6	Cell 7	Cell 9	Cell 10	Mean	SEM
-90	-1	-1	-1	-1	-1	-1	-1	-1	0		-90	-1	-1	-1	-1	-1	-1	-1	-1	0		-90	-1	-1	-1	-1	-1	0
-80	-0.891539	-0.765899	-0.789674	-0.781883	-0.823837	-0.853856	-0.837773	-0.820637	0.0168264		-80	-0.79778	-0.882576	-0.862132	-0.869736	-0.862552	-0.859338	-0.86746	-0.857368	0.0103446		-80	-0.848361	-0.870722	-0.8067	-0.763512	-0.822324	0.0236701
-70	-0.764677	-0.57719	-0.631843	-0.660814	-0.702367	-0.720908	-0.743804	-0.685943	0.025083		-70	-0.820232	-0.742922	-0.732086	-0.744032	-0.756684	-0.730507	-0.722483	-0.749849	0.0124603		-70	-0.712128	-0.763049	-0.723986	-0.621707	-0.705218	0.0298865
-60	-0.532385	-0.562107	-0.517873	-0.582237	-0.587722	-0.55714	-0.635441	-0.567844	0.0146982		-60	-0.572243	-0.609008	-0.613766	-0.601693	-0.621493	-0.61751	-0.590026	-0.603677	0.00657802		-60	-0.589465	-0.627049	-0.60285	-0.560246	-0.594902	0.013926
-50	-0.429587	-0.432408	-0.416077	-0.48922	-0.494008	-0.447826	-0.473863	-0.454713	0.0117216		-50	-0.45922	-0.458342	-0.461431	-0.479692	-0.474682	-0.50051	-0.466898	-0.471539	0.00570154		-50	-0.476695	-0.521553	-0.472666	-0.392405	-0.46583	0.0268656
-40	-0.268151	-0.340442	-0.290623	-0.320685	-0.403788	-0.3534	-0.354632	-0.333103	0.0169755		-40	-0.31789	-0.351453	-0.330797	-0.361158	-0.353784	-0.363165	-0.347443	-0.346527	0.00624145		-40	-0.388069	-0.422992	-0.363963	-0.31039	-0.371354	0.0236591
-30	-0.100796	-0.272353	-0.215766	-0.23556	-0.276408	-0.200973	-0.241577	-0.220491	0.0224766		-30	-0.232919	-0.23368	-0.208555	-0.242814	-0.250206	-0.28514	-0.231672	-0.240712	0.00885656		-30	-0.267049	-0.315634	-0.258577	-0.213155	-0.263604	0.0209948
-20	-0.0227399	-0.152111	-0.156622	-0.140684	-0.15102	-0.111544	-0.134818	-0.12422	0.0178542		-20	-0.10503	-0.129771	-0.105579	-0.142268	-0.13408	-0.182339	-0.132724	-0.133113	0.00983917		-20	-0.177249	-0.202702	-0.161939	-0.136761	-0.169663	0.0138183
-10	-0.00894264	-0.0897915	-0.0824555	-0.0549297	-0.0685388	-0.0370427	-0.0564745	-0.0568822	0.0104297		-10	-0.0514204	-0.0474355	-0.020595	-0.0516093	-0.049539	-0.0867606	-0.0470699	-0.0506328	0.00729182		-10	-0.0930159	-0.101799	-0.0694138	-0.048686	-0.0782286	0.0119884
0	-0.0290423	-0.0343751	-0.0646693	-0.048616	-0.0610612	-0.0138968	-0.0146322	-0.0380419	0.0078318		0	0.0786071	0.0179604	0.0339648	0.0176012	0.0416615	-0.00752198	0.0048206	0.0267276	0.0106681		0	-0.0214675	-0.0169871	-0.0276869	0.072991	0.00171238	0.0238606
10	0.0443299	0.0384888	0.0750302	0.0860403	0.0987429	0.0327252	0.0399072	0.0593235	0.0100685		10	0.115416	0.0673497	0.0792484	0.0839902	0.122752	0.0686237	0.0640799	0.0859228	0.00899186		10	0.0419186	0.0535624	0.0597303	0.0689959	0.0560518	0.0056791
20	0.0554444	0.066859	0.0988603	0.136366	0.166792	0.036313	0.055719	0.0880505	0.0181828		20	0.18043	0.113879	0.148038	0.144849	0.211238	0.147177	0.120622	0.152319	0.0127659		20	0.0732827	0.101478	0.0892546	0.0968403	0.0902139	0.00618044
30	0.0754163	0.13769	0.113452	0.198044	0.255967	0.0448262	0.0674354	0.127547	0.0288415		30	0.240912	0.189218	0.248553	0.225271	0.315752	0.235901	0.185181	0.234398	0.0164825		30	0.10295	0.147889	0.121633	0.0935288	0.1165	0.0119822
40	0.144019	0.15996	0.198584	0.301927	0.329078	0.0685821	0.105368	0.186788	0.0367726		40	0.379798	0.2808	0.345392	0.332388	0.447881	0.339235	0.250152	0.339378	0.0243411		40	0.170023	0.220507	0.191463	0.219414	0.200352	0.0121395
50	0.226121	0.312639	0.187014	0.464429	0.4832	0.110753	0.160159	0.277759	0.055825		50	0.541187	0.386662	0.513063	0.447113	0.594596	0.464918	0.382223	0.47568	0.0298489		50	0.242069	0.342498	0.298663	0.255962	0.284798	0.0226914
60	0.390112	0.312781	0.299171	0.543349	0.780669	0.187524	0.265036	0.396949	0.0766292		60	0.775277	0.501695	0.67699	0.57886	0.767939	0.598266	0.51189	0.630131	0.0426434		60	0.334334	0.461025	0.408717	0.333389	0.384367	0.031053
70	0.532428	0.539458	0.392506	0.779767	0.895412	0.27296	0.37666	0.541313	0.0850205		70	0.998524	0.638382	0.847052	0.716706	0.948872	0.733241	0.617262	0.78572	0.05633		70	0.449851	0.59927	0.551543	0.489883	0.522637	0.0330136
80	0.72759	0.764906	0.596097	1.00114	1.19131	0.424476	0.580517	0.755149	0.099612		80	1.17885	0.794392	1.0064	0.889183	1.11795	0.903791	0.753264	0.949118	0.0602588		80	0.573038	0.734763	0.657391	0.628574	0.648442	0.0336798
90	0.92288	0.709726	0.984286	1.24259	1.45208	0.637387	0.76175	0.958672	0.112332		90	1.53233	0.98439	1.24512	1.01821	1.34701	1.09405	0.876786	1.15684	0.0867781		90	0.712405	0.922356	0.840546	0.73784	0.803287	0.0483981
GluK1-2a											GluK1-2a + Neto1							GluK1-2a + Neto2
mV	IV Plot											IV Plot							IV Plot
	Cell 2	Cell 3	Cell 5	Cell 6	Cell 10	Cell 11	Cell 12	Mean	SEM		mV	Cell 2	Cell 5	Cell 6	Mean	SEM		mV	Cell 2	Cell 7	Cell 8	Mean	SEM
-90	-1	-1	-1	-1	-1	-1	-1	-1	0		-90	-1	-1	-1	-1	0		-90	-1	-1	-1	-1	0
-80	-0.832913	-0.887885	-0.845495	-0.90936	-0.87026	-0.845483	-0.807299	-0.856956	0.0130809		-80	-0.85991	-0.834325	-0.881756	-0.858664	0.0137061		-80	-0.784906	-0.864026	-0.839638	-0.829523	0.0233932
-70	-0.633333	-0.749218	-0.728823	-0.904759	-0.73754	-0.662768	-0.576876	-0.713331	0.0397417		-70	-0.752444	-0.730432	-0.722518	-0.735132	0.00895271		-70	-0.650703	-0.71296	-0.713402	-0.692355	0.0208266
-60	-0.584252	-0.651026	-0.583849	-0.561909	-0.590551	-0.510503	-0.579238	-0.58019	0.0156953		-60	-0.621526	-0.529626	-0.579911	-0.577021	0.0265686		-60	-0.51583	-0.574841	-0.566523	-0.552398	0.0184411
-50	-0.451129	-0.511847	-0.587041	-0.480498	-0.433797	-0.355976	-0.449129	-0.46706	0.0269935		-50	-0.497749	-0.406024	-0.43299	-0.445588	0.0272177		-50	-0.388556	-0.469509	-0.448815	-0.435626	0.0242816
-40	-0.333701	-0.347435	-0.328896	-0.343855	-0.334601	-0.261551	-0.340397	-0.327205	0.0112024		-40	-0.371395	-0.345571	-0.313833	-0.3436	0.016646		-40	-0.273839	-0.331548	-0.318006	-0.307797	0.0174234
-30	-0.22378	-0.218832	-0.234552	-0.138791	-0.207913	-0.186109	-0.238747	-0.206961	0.013164		-30	-0.261616	-0.206056	-0.191564	-0.219745	0.0213492		-30	-0.169004	-0.21915	-0.205145	-0.197767	0.0149386
-20	-0.124147	-0.0971666	-0.136913	-0.0492244	-0.10398	-0.0792199	-0.143056	-0.104815	0.0126029		-20	-0.154311	-0.124392	-0.0916754	-0.123459	0.0180873		-20	-0.0825531	-0.105138	-0.0891384	-0.0922763	0.0067057
-10	-0.0708661	-0.0429897	-0.0598073	-0.0183481	-0.0391808	-0.0374045	-0.0695387	-0.0483051	0.00727016		-10	-0.0686517	-0.0492905	-0.025348	-0.0477634	0.012524		-10	-0.0106519	-0.00451666	0.0192062	0.00134587	0.0091041
0	0.0530709	0.0362091	0.0236081	0.0392417	-0.00626735	0.0107626	-0.0290433	0.018226	0.0107992		0	-0.00372096	0.0186173	0.0442686	0.0197217	0.0138644		0	0.0463954	0.0643374	0.0957936	0.0688421	0.0144368
10	0.0714436	0.0763801	0.0330514	0.0520483	0.0149742	0.0190136	0.0200706	0.0409974	0.00971326		10	0.0462658	0.0590142	0.118993	0.0747576	0.0224217		10	0.0891814	0.123196	0.183993	0.132124	0.0277313
20	0.0787402	0.0907426	0.0346253	0.0561845	0.0227319	0.0387226	0.0376619	0.0513441	0.0094754		20	0.0969276	0.0989762	0.163544	0.119816	0.021872		20	0.141747	0.124804	0.271477	0.179342	0.0463262
30	0.0954331	0.109599	0.037773	0.0713244	0.0207866	0.0249917	0.0522308	0.058877	0.01305		30	0.15727	0.153326	0.25843	0.189675	0.034396		30	0.224006	0.310324	0.402455	0.312262	0.0515229
40	0.160577	0.155423	0.0661028	0.0943922	0.0237908	0.040352	0.0672601	0.0868426	0.0202058		40	0.248584	0.243844	0.403125	0.298518	0.0523216		40	0.32564	0.455047	0.528213	0.4363	0.0592243
50	0.196955	0.243747	0.0944179	0.121437	0.0364667	0.0504608	0.0930213	0.119501	0.0286321		50	0.37391	0.364639	0.55992	0.432823	0.0636048		50	0.478524	0.641429	0.719407	0.61312	0.0709627
60	0.364042	0.382877	0.159064	0.248668	0.0547433	0.0830912	0.120211	0.201814	0.0501209		60	0.595263	0.494012	0.781053	0.623443	0.0840511		60	0.637697	0.820857	0.875212	0.777922	0.071847
70	0.466509	0.541011	0.249202	0.361965	0.109706	0.173022	0.200104	0.300217	0.0606602		70	0.679877	0.620183	0.96166	0.753906	0.105296		70	0.816922	1.05826	1.05978	0.978322	0.0807011
80	0.775853	0.760039	0.351504	0.501259	0.185667	0.263617	0.279831	0.445396	0.0910328		80	0.866509	0.802403	1.21166	0.960191	0.127089		80	1.01611	1.23031	1.29607	1.18083	0.0845195
90	0.939633	0.974548	0.523998	0.690243	0.317054	0.406842	0.40839	0.608672	0.10037		90	1.0286	0.976718	1.41945	1.14159	0.139734		90	1.16008	1.45466	1.49098	1.36857	0.104772
Figure 3G
GluK1-1a+Neto1				GluK1-1a+Neto2			GluK1-2a					GluK1-2a + Neto1					GluK1-2a + Neto2
	Desensitization 100ms
		tau Desensitization						tau Desensitization					tau Desensitization					tau Desensitization
01.02.2023	Cell 1	5.24558			tau Desensitization		Cell 2	2.40099			01.20.2023	Cell 1	6.61798			01.14.2023	Cell 1	10.7536
	Cell 2	6.34921		Cell 1	42.423		cell 3	2.74818				Cell 3	3.50692				Cell 2	21.856
	Cell 3	5.01105		Cell 2	32.326		Cell 4	1.0985				Cell 4	1.8577				Cell 3	22.4141
	Cell 4	1.94861		Cell 3	30.1606		Cell 5	2.28015			02.12.2023	Cell 2	5.93192				Cell 5	25.669
01.04.2023	Cell 1	5.64571		Cell 4	22.6599		Cell 9	3.18066				Cell 3	1.96505			01.09.2023	Cell 1	22.121
	Cell 2	5.07113		Mean	31.8924		Mean	2.3417				Cell 5	1.18694			01.11.2023	Cell 1	22.6507
	Cell 3	6.18763		SEM	4.07554		SEM	0.34799				Cell 6	1.49498				Mean	20.9107
	Cell 4	3.49191		N	4		N	5				Cell 7	1.75862				SEM	2.10915
	Cell 5	4.51613										Cell 8	1.25627				N	6
	Mean	4.82966										Mean	2.84182
	SEM	0.460548										SEM	0.689481
	N	9										N	9
Figure 3H
GluK1-1a+Neto1					GluK1-1a+Neto2				GluK1-2a			GluK1-2a + Neto1				GluK1-2a + Neto2
	Deactivation 1ms									tau Deactivation				tau Deactivation				tau Deactivation
		tau Deactivation					tau Deactivation		Cell 2	1.3253		01.20.2023	Cell 1	4.19364		01.14.2023	Cell 1	5.90957
01.02.2023	Cell 1	3.1287			01.11.2023	Cell 2	5.57016		Cell 4	1.3769			Cell 2	2.80694			Cell 2	8.59737
	Cell 2	2.87932				Cell 3	6.06786		Cell 5	2.34669			Cell 3	2.45679			Cell 3	11.519
	Cell 3	3.20447				Cell 4	3.90219		Cell 9	1.01283		02.12.2023	Cell 1	3.63211			Cell 4	15.2606
	Cell 4	1.52354				Mean	5.18007		Mean	1.51543			Cell 2	2.53987			Cell 5	16.0219
01.04.2023	Cell 1	3.51103				SEM	0.654894		SEM	0.288522			Cell 3	1.76421			Cell 6	14.3646
	Cell 2	2.43743				N	3		N	4			Cell 5	0.903452		01.09.2023	Cell 1	9.13954
	Cell 3	3.01026											Cell 6	1.14385		01.11.2023	Cell 2	5.16611
	Cell 4	2.54552											Cell 7	1.04864			Mean	10.7473
	Cell 5	3.29633											Cell 8	0.946341			SEM	1.48584
	Mean	2.8374											Mean	2.14358			N	8
	SEM	0.200244											SEM	0.371592
	N	9											N	10
Raw traces Figure 3A
Time (ms)	GluK1-1a	+ Neto1	+ Neto2		Time (ms)	GluK1-2A	+Neto1	+Neto2
0	0.967579	0.996266	0.997032		80	-24.9104	-69.4379	-36.7429
0.100006	0.976697	0.995999	0.996913		80.1	-25.2218	-67.5696	-34.8746
0.200012	0.984802	0.992798	0.997032		80.2	-24.9104	-71.9289	-37.6771
0.300018	0.98075	0.992798	0.996557		80.3	-24.9104	-69.1265	-39.8567
0.400024	0.979737	0.992798	0.997982		80.4	-24.9104	-68.5037	-36.1202
0.5	0.978723	0.995999	0.99632		80.5	-27.7129	-63.833	-35.4974
0.600006	0.972644	0.995732	0.9981		80.6	-25.2218	-69.4379	-39.8567
0.700012	0.972644	0.994132	0.996557		80.7	-23.9763	-68.5037	-39.234
0.800018	0.9615	0.993865	0.99632		80.8	-25.5332	-64.7672	-38.6112
0.900024	0.969605	0.995199	0.997744		80.9	-28.3356	-65.7013	-33.3177
1	0.964539	0.995732	0.996794		81	-30.2039	-65.0786	-34.5632
1.10001	0.967579	0.994665	0.999644		81.1	-25.5332	-61.9647	-32.695
1.20001	0.986829	0.994398	0.995726		81.2	-24.9104	-68.5037	-36.7429
1.30002	1	0.994398	0.994183		81.3	-26.4674	-70.0606	-36.4315
1.40002	0.976697	0.995999	0.997151		81.4	-27.0901	-70.0606	-33.6291
1.5	0.959473	0.993332	0.997626		81.5	-25.8446	-68.1924	-36.1202
1.60001	0.967579	0.996266	0.996082		81.6	-23.3535	-64.1444	-35.186
1.70001	0.969605	0.993865	0.997626		81.7	-26.156	-66.0127	-35.4974
1.80002	0.972644	0.994132	0.997863		81.8	-24.9104	-66.6355	-33.6291
1.90002	0.967579	0.991731	0.997982		81.9	-26.7787	-69.1265	-32.0722
2	0.970618	0.994132	0.997863		82	-25.2218	-68.8151	-33.0063
2.10001	0.964539	0.993598	0.996913		82.1	-23.9763	-66.3241	-34.2519
2.20001	0.968592	0.996799	0.995726		82.2	-24.9104	-67.881	-32.0722
2.30002	0.972644	0.996266	0.996913		82.3	-26.7787	-68.8151	-33.3177
2.40002	0.967579	0.994132	0.995607		82.4	-29.2698	-65.3899	-32.3836
2.5	0.978723	0.995999	0.994183		82.5	-27.7129	-67.2582	-35.4974
2.60001	0.972644	0.993332	0.996794		82.6	-27.7129	-72.2403	-34.5632
2.70001	0.9615	0.994665	0.99632		82.7	-26.4674	-66.0127	-32.0722
2.80002	0.971631	0.993865	0.995607		82.8	-27.7129	-66.0127	-32.0722
2.90002	0.967579	0.993332	0.998219		82.9	-26.7787	-63.5216	-34.5632
3	0.972644	0.993865	0.997507		83	-24.2877	-67.2582	-33.6291
3.10001	0.976697	0.994398	0.996557		83.1	-22.4194	-64.7672	-33.3177
3.20001	0.976697	0.994398	0.997151		83.2	-20.8625	-62.5875	-37.6771
3.30002	0.98075	0.995199	0.997151		83.3	-24.2877	-65.0786	-35.4974
3.40002	0.971631	0.98933	0.995845		83.4	-22.108	-67.881	-32.0722
3.5	0.974671	0.993598	0.998457		83.5	-29.2698	-65.3899	-37.6771
3.60001	0.972644	0.994132	0.997269		83.6	-32.0722	-63.5216	-33.9405
3.70001	0.976697	0.993865	0.996082		83.7	-23.3535	-62.2761	-33.6291
3.80002	0.972644	0.993598	0.997388		83.8	-22.108	-65.0786	-32.695
3.90002	0.971631	0.995199	0.997744		83.9	-26.156	-63.5216	-34.5632
4	0.978723	0.993598	0.99537		84	-28.0243	-61.6534	-33.6291
4.10001	0.971631	0.993065	0.999288		84.1	-25.8446	-62.8989	-32.695
4.20001	0.972644	0.994932	0.997151		84.2	-30.5153	-61.9647	-33.3177
4.30002	0.967579	0.994398	0.997269		84.3	-26.4674	-59.4737	-31.1381
4.40002	0.9615	0.995732	0.997863		84.4	-25.5332	-60.0965	-34.2519
4.5	0.984802	0.991998	0.996557		84.5	-25.5332	-60.0965	-33.6291
4.60001	0.975684	0.993065	0.997151		84.6	-21.7966	-58.2282	-37.3657
4.70001	0.98075	0.991198	0.998575		84.7	-24.2877	-59.1623	-33.9405
4.80002	0.968592	0.993598	0.997982		84.8	-25.2218	-59.1623	-33.0063
4.90002	0.98075	0.993865	0.997626		84.9	-23.9763	-58.2282	-33.6291
5	0.978723	0.993598	0.9981		85	-23.6649	-56.0485	-33.0063
5.10001	0.985816	0.993598	0.997982		85.1	-24.2877	-62.5875	-29.8925
5.20001	0.982776	0.993332	0.99632		85.2	-23.6649	-60.0965	-30.2039
5.30002	0.970618	0.994398	0.99905		85.3	-18.6828	-60.0965	-33.6291
5.40002	0.960486	0.994398	0.998575		85.4	-21.4853	-60.0965	-34.8746
5.5	0.968592	0.993865	0.997626		85.5	-22.4194	-56.3599	-31.7608
5.60001	0.985816	0.993598	0.997388		85.6	-19.9284	-56.6713	-32.0722
5.70001	0.982776	0.994398	0.997032		85.7	-21.7966	-56.9827	-27.4015
5.80002	0.973658	0.995199	0.996676		85.8	-41.4136	-56.6713	-66.3241
5.90002	0.973658	0.994932	0.997982		85.9	-47.9526	-55.4258	-93.1028
6	0.990882	0.995199	0.997626		86	-29.5812	-56.9827	-34.2519
6.10001	0.959473	0.994398	0.9981		86.1	-30.5153	-58.2282	-52.9347
6.20001	0.984802	0.990931	0.9981		86.2	-7.16175	-59.7851	-13.7007
6.30002	0.98075	0.992265	0.996676		86.3	-14.6349	-60.7192	-32.3836
6.40002	0.974671	0.994398	0.997863		86.4	-18.0601	-56.9827	-48.5754
6.5	0.970618	0.993598	0.998575		86.5	-22.7308	-61.9647	-44.216
6.60001	0.98075	0.994932	0.998813		86.6	-23.6649	-61.9647	-28.3356
6.70001	0.963526	0.994398	0.997744		86.7	-24.5991	-61.9647	-26.7787
6.80002	0.979737	0.995465	0.998457		86.8	-23.3535	-59.7851	-35.4974
6.90002	0.981763	0.995465	0.995963		86.9	-22.108	-58.8509	-33.9405
7	0.97771	1	0.9981		87	-26.7787	-57.9168	-33.0063
7.10001	0.978723	0.994665	0.999288		87.1	-23.0422	-60.0965	-35.4974
7.20001	0.970618	0.993065	0.999763		87.2	-27.4015	-62.2761	-34.2519
7.30002	0.968592	0.993598	0.997151		87.3	-22.108	-61.6534	-36.1202
7.40002	0.986829	0.993332	0.997626		87.4	-23.3535	-63.833	-34.2519
7.5	0.987842	0.993065	0.996794		87.5	-20.5511	-65.3899	-35.8088
7.60001	0.976697	0.993598	0.999169		87.6	-19.9284	-65.3899	-33.3177
7.70001	0.984802	0.993865	0.997626		87.7	-19.9284	-63.2103	-34.5632
7.80002	0.974671	0.994398	0.99905		87.8	-22.4194	-66.0127	-36.4315
7.90002	0.983789	0.994398	0.9981		87.9	-23.9763	-73.4858	-35.4974
8	0.97771	0.994398	0.99905		88	-23.9763	-75.6655	-32.3836
8.10001	0.992908	0.997333	0.998575		88.1	-19.617	-73.1744	-38.6112
8.20001	0.98075	0.995999	0.999881		88.2	-25.2218	-80.959	-35.4974
8.30002	0.979737	0.993065	0.9981		88.3	-21.4853	-51.6892	-33.6291
8.40002	0.97771	0.995999	0.997744		88.4	-19.617	-67.5696	-14.6349
8.5	0.969605	0.995999	0.997388		88.5	-14.3235	-67.881	32.695
8.60001	0.984802	0.996266	0.997507		88.6	-20.2397	-68.1924	-29.5812
8.70001	0.988855	0.996532	0.997982		88.7	-21.4853	-69.1265	-34.5632
8.80002	0.984802	0.995999	0.997982		88.8	-15.569	-68.8151	-34.5632
8.90002	0.975684	0.993332	0.996676		88.9	-19.617	-67.2582	-32.0722
9	0.975684	0.994398	0.998813		89	-23.0422	-69.1265	-41.4136
9.10001	0.98075	0.993865	0.997863		89.1	-23.3535	-68.1924	-30.2039
9.20001	0.975684	0.996532	0.998694		89.2	-21.4853	-70.9948	-30.8267
9.30002	0.986829	0.996266	0.998813		89.3	-28.0243	-76.911	-31.4494
9.40002	0.984802	0.995465	0.9981		89.4	-21.1739	-71.9289	-31.1381
9.5	0.987842	0.995732	0.998457		89.5	-16.5032	-68.8151	-39.5453
9.60001	0.984802	0.994932	0.997982		89.6	-23.6649	-69.1265	-28.0243
9.70001	0.987842	0.994132	0.998219		89.7	-19.3056	-67.5696	-30.5153
9.80002	0.976697	0.994665	0.998457		89.8	-19.617	-66.9468	-28.3356
9.90002	0.971631	0.994665	1		89.9	-20.2397	-71.9289	-37.6771
10	0.979737	0.996532	0.999525		90	-23.0422	-68.1924	-37.9884
10.1	0.982776	0.996266	0.995845		90.1	-21.4853	-67.881	-35.186
10.2	0.986829	0.995465	0.99347		90.2	-19.617	-60.4078	-32.3836
10.3	0.979737	0.994398	0.98789		90.3	-23.3535	-66.3241	-30.2039
10.4	0.988855	0.993598	0.980173		90.4	-28.9584	-67.2582	-33.9405
10.5	0.989868	0.997066	0.966995		90.5	-21.7966	-58.2282	-32.695
10.6	0.979737	0.989597	0.955716		90.6	-21.4853	-49.1981	-19.617
10.7	0.974671	0.984796	0.936365		90.7	-18.9942	-61.6534	-32.0722
10.8	0.964539	0.977594	0.903241		90.8	-21.4853	-64.4558	-33.9405
10.9	0.966565	0.962657	0.864419		90.9	-14.9463	-62.2761	-34.5632
11	0.942249	0.939984	0.820848		91	-17.7487	-65.3899	-34.8746
11.1	0.924012	0.911443	0.781907		91.1	-19.3056	-73.7972	-57.6054
11.2	0.922999	0.873566	0.739523		91.2	-20.2397	-70.6834	-21.7966
11.3	0.891591	0.82422	0.698089		91.3	-21.1739	-67.2582	-26.7787
11.4	0.850051	0.765804	0.651431		91.4	-30.5153	-64.1444	-35.186
11.5	0.7923	0.701787	0.591951		91.5	-17.4373	-66.0127	-34.2519
11.6	0.721378	0.626567	0.547904		91.6	-21.1739	-69.4379	-32.695
11.7	0.627153	0.56095	0.510388		91.7	-20.2397	-70.6834	-46.3957
11.8	0.547112	0.493198	0.464561		91.8	-24.2877	-66.3241	-37.6771
11.9	0.48227	0.422246	0.430132		91.9	-24.5991	-68.1924	-23.9763
12	0.442756	0.357962	0.398433		92	-27.0901	-68.8151	-33.3177
12.1	0.408308	0.305948	0.366971		92.1	-18.3715	-66.0127	-35.4974
12.2	0.364742	0.254201	0.341802		92.2	-20.8625	-65.0786	-35.186
12.3	0.349544	0.213123	0.314259		92.3	-26.7787	-67.881	-37.0543
12.4	0.324215	0.176047	0.294076		92.4	-22.7308	-68.1924	-54.4916
12.5	0.282675	0.134169	0.270687		92.5	-22.4194	-64.7672	-40.1681
12.6	0.251266	0.102427	0.231509		92.6	-19.3056	-67.881	-23.6649
12.7	0.22695	0.0821552	0.218568		92.7	-25.5332	-61.0306	-29.5812
12.8	0.193516	0.0618831	0.195299		92.8	-22.7308	-60.0965	-37.0543
12.9	0.194529	0.0464123	0.178915		92.9	-26.4674	-62.8989	-32.695
13	0.175279	0.0378768	0.164668		93	-21.4853	-65.0786	-37.9884
13.1	0.160081	0.0245398	0.144485		93.1	-27.7129	-63.2103	-44.216
13.2	0.161094	0.0168045	0.133682		93.2	-23.9763	-64.1444	-30.2039
13.3	0.158055	0.00933582	0.111599		93.3	-24.2877	-63.833	-33.0063
13.4	0.144884	0.00773539	0.0956903		93.4	-20.5511	-61.6534	-35.186
13.5	0.131712	0	0.0921287		93.5	-23.6649	-66.6355	-37.9884
13.6	0.137791	0.00346761	0.0926035		93.6	-21.4853	-66.0127	-37.6771
13.7	0.135765	0.00800214	0.0848866		93.7	-24.5991	-69.7493	-46.3957
13.8	0.136778	0.0114697	0.077882		93.8	-28.0243	-71.9289	-28.9584
13.9	0.14691	0.00986922	0.0700463		93.9	-28.647	-68.5037	-36.7429
14	0.125633	0.00720188	0.0647038		94	-22.7308	-67.2582	-39.234
14.1	0.10233	0.0109362	0.056037		94.1	-23.6649	-67.881	-36.1202
14.2	0.0942249	0.0157375	0.0520005		94.2	-24.5991	-73.4858	-39.8567
14.3	0.0972645	0.0125367	0.051763		94.3	-30.2039	-73.7972	-35.4974
14.4	0.0942249	0.0146705	0.0427401		94.4	-25.8446	-65.0786	-34.2519
14.5	0.0861195	0.0269405	0.0391784		94.5	-29.5812	-70.372	-40.1681
14.6	0.115502	0.043745	0.0382286		94.6	-24.5991	-70.6834	-34.5632
14.7	0.123607	0.0554814	0.035498		94.7	-22.4194	-68.1924	-37.3657
14.8	0.0992908	0.0677514	0.0364478		94.8	-25.8446	-67.5696	-48.8868
14.9	0.0780142	0.0760202	0.0307491		94.9	-27.4015	-66.0127	-37.6771
15	0.077001	0.0885569	0.0244568		95	-24.9104	-67.881	-32.0722
15.1	0.0982776	0.0957589	0.0182833		95.1	-22.7308	-66.3241	-36.7429
15.2	0.0780142	0.106962	0.0150777		95.2	-26.4674	-66.3241	-37.9884
15.3	0.0618035	0.114964	0.0163837		95.3	-29.5812	-64.1444	-33.6291
15.4	0.0466059	0.128034	0.0151965		95.4	-32.3836	-63.5216	-39.5453
15.5	0.0364742	0.145906	0.0117535		95.5	-26.4674	-61.342	-33.3177
15.6	0.0293819	0.155241	0.00356163		95.6	-28.0243	-64.1444	-34.8746
15.7	0.0364742	0.165644	0.000474829		95.7	-24.5991	-65.3899	-36.4315
15.8	0.023303	0.17418	0		95.8	-25.8446	-66.0127	-40.1681
15.9	0.0324215	0.186183	0.0130594		95.9	-20.2397	-65.7013	-42.9705
16	0.0121581	0.204321	0.0294432		96	-23.6649	-66.0127	-49.5095
16.1	0	0.217125	0.0379912		96.1	-25.8446	-64.4558	-32.3836
16.2	0.00405266	0.226994	0.0289683		96.2	-26.4674	-61.0306	-35.4974
16.3	0.0374874	0.241931	0.019233		96.3	-25.8446	-63.833	-39.5453
16.4	0.0385005	0.252867	0.0100914		96.4	-25.2218	-66.0127	-33.3177
16.5	0.070922	0.267805	0.0112786		96.5	-25.5332	-66.6355	-35.4974
16.6	0.0780142	0.281408	0.0216075		96.6	-26.7787	-71.9289	-42.9705
16.7	0.08308	0.29848	0.0111599		96.7	-27.4015	-65.7013	-36.4315
16.8	0.0739616	0.310216	0.00926032		96.8	-28.0243	-65.7013	-38.9226
16.9	0.0729483	0.327287	0.0204202		96.9	-25.2218	-71.9289	-37.9884
17	0.0861195	0.343292	0.0182833		97	-28.9584	-66.0127	-34.8746
17.1	0.126646	0.353694	0.0181645		97.1	-29.5812	-67.2582	-42.3478
17.2	0.132725	0.359296	0.019708		97.2	-27.4015	-63.5216	-42.0364
17.3	0.1692	0.373966	0.0246943		97.3	-25.2218	-61.6534	-37.3657
17.4	0.183384	0.387303	0.0255253		97.4	-29.2698	-66.3241	-38.6112
17.5	0.175279	0.395572	0.0198266		97.5	-28.3356	-65.0786	-39.234
17.6	0.186424	0.411043	0.0140093		97.6	-29.5812	-63.833	-39.234
17.7	0.193516	0.42518	0.0154339		97.7	-29.5812	-64.1444	-46.7071
17.8	0.197568	0.432649	0.0331236		97.8	-23.9763	-68.5037	-37.3657
17.9	0.202634	0.445185	0.0326487		97.9	-26.7787	-66.3241	-37.6771
18	0.205674	0.456122	0.0316989		98	-31.1381	-66.6355	-37.9884
18.1	0.205674	0.471326	0.0320551		98.1	-27.0901	-61.9647	-35.8088
18.2	0.246201	0.481995	0.0375163		98.2	-26.7787	-61.342	-38.6112
18.3	0.257345	0.496666	0.0445209		98.3	-23.0422	-62.8989	-42.0364
18.4	0.263425	0.512137	0.0489137		98.4	-27.7129	-64.1444	-31.1381
18.5	0.26849	0.528141	0.0540188		98.5	-25.5332	-67.881	-39.234
18.6	0.267477	0.539611	0.0609047		98.6	-26.4674	-64.1444	-38.9226
18.7	0.297872	0.552681	0.0662471		98.7	-23.9763	-64.4558	-35.8088
18.8	0.318136	0.568418	0.0718271		98.8	-29.2698	-63.833	-44.216
18.9	0.33232	0.582555	0.070165		98.9	-23.3535	-67.2582	-34.5632
19	0.344478	0.595625	0.062448		99	-25.5332	-62.2761	-35.4974
19.1	0.355623	0.610029	0.0617357		99.1	-29.8925	-62.8989	-41.4136
19.2	0.346505	0.626834	0.0717084		99.2	-28.9584	-58.2282	-40.4795
19.3	0.346505	0.640704	0.0676718		99.3	-25.2218	-59.4737	-38.2998
19.4	0.357649	0.65084	0.073133		99.4	-28.0243	-61.342	-47.3299
19.5	0.368794	0.661776	0.0899916		99.5	-24.2877	-61.9647	-33.6291
19.6	0.389058	0.67458	0.0905852		99.6	-31.1381	-62.5875	-36.4315
19.7	0.39615	0.684449	0.0917725		99.7	-24.5991	-61.6534	-36.1202
19.8	0.409321	0.694318	0.0969963		99.8	-23.9763	-63.833	-40.4795
19.9	0.408308	0.703388	0.104713		99.9	-27.0901	-61.6534	-37.3657
20	0.428571	0.712723	0.10875		100	-30.2039	-58.5396	-42.0364
20.1	0.448835	0.722593	0.110412		100.1	-25.5332	-56.6713	-37.3657
20.2	0.469098	0.727127	0.111124		100.2	-30.8267	-60.4078	-40.7909
20.3	0.475177	0.736463	0.117891		100.3	-25.5332	-57.6054	-38.9226
20.4	0.497467	0.745799	0.129051		100.4	-24.2877	-56.9827	-36.7429
20.5	0.460993	0.748199	0.13843		100.5	-28.9584	-62.2761	-45.4616
20.6	0.48227	0.756468	0.144129		100.6	-28.3356	-66.0127	-42.0364
20.7	0.491388	0.76207	0.14781		100.7	-26.7787	-61.0306	-50.1323
20.8	0.480243	0.773006	0.149115		100.8	-28.0243	-63.833	-54.4916
20.9	0.485309	0.781808	0.151727		100.9	-28.3356	-63.2103	-63.2103
21	0.518744	0.790344	0.151371		101	-28.0243	-61.342	-92.1687
21.1	0.530902	0.792478	0.149472		101.1	-27.7129	-57.9168	-128.912
21.2	0.525836	0.797546	0.157189		101.2	-35.186	-59.7851	-179.667
21.3	0.527862	0.801014	0.160869		101.3	-43.9047	-59.4737	-249.727
21.4	0.518744	0.810883	0.161581		101.4	-56.3599	-59.7851	-318.231
21.5	0.521783	0.815684	0.159563		101.5	-69.7493	-63.833	-405.106
21.6	0.54002	0.820485	0.166449		101.6	-104.624	-63.5216	-509.73
21.7	0.558257	0.828754	0.178915		101.7	-156.002	-73.4858	-586.952
21.8	0.559271	0.834889	0.179152		101.8	-207.38	-84.6955	-666.977
21.9	0.563323	0.835689	0.176659		101.9	-261.248	-97.7735	-768.487
22	0.570415	0.83729	0.181883		102	-317.297	-116.145	-847.889
22.1	0.567376	0.83729	0.182477		102.1	-363.381	-148.217	-915.77
22.2	0.563323	0.846092	0.180577		102.2	-430.017	-202.397	-978.358
22.3	0.582573	0.858095	0.193755		102.3	-501.011	-275.572	-1028.49
22.4	0.597771	0.862097	0.19791		102.4	-554.569	-372.411	-1071.46
22.5	0.605876	0.862363	0.196842		102.5	-605.947	-495.095	-1120.04
22.6	0.619048	0.869565	0.193874		102.6	-669.468	-633.348	-1177.95
22.7	0.633232	0.870632	0.195536		102.7	-728.008	-766.308	-1237.74
22.8	0.647416	0.871699	0.205865		102.8	-766.619	-891.794	-1253.31
22.9	0.642351	0.873833	0.209189		102.9	-778.14	-1013.23	-1281.64
23	0.64843	0.8741	0.207171		103	-793.398	-1163.01	-1318.07
23.1	0.653495	0.8749	0.209901		103.1	-793.398	-1310.91	-1340.8
23.2	0.66768	0.878634	0.215481		103.2	-796.512	-1419.58	-1373.5
23.3	0.666667	0.880768	0.212632		103.3	-794.332	-1536.04	-1410.24
23.4	0.669706	0.881835	0.216194		103.4	-799.003	-1642.84	-1423.01
23.5	0.668693	0.884503	0.22023		103.5	-815.506	-1716.95	-1437.64
23.6	0.678825	0.889037	0.226879		103.6	-818.308	-1764.28	-1456.02
23.7	0.675785	0.886103	0.226523		103.7	-799.314	-1825.31	-1461.62
23.8	0.661601	0.887703	0.225098		103.8	-788.727	-1860.19	-1465.67
23.9	0.663627	0.893572	0.228303		103.9	-776.272	-1874.51	-1486.84
24	0.66768	0.896239	0.226641		104	-767.865	-1877	-1474.7
24.1	0.681864	0.898906	0.225335		104.1	-768.799	-1868.6	-1474.08
24.2	0.688956	0.901307	0.229372		104.2	-764.439	-1851.47	-1493.07
24.3	0.690983	0.905575	0.239938		104.3	-755.098	-1845.24	-1498.67
24.4	0.712259	0.907442	0.237682		104.4	-751.361	-1841.82	-1507.08
24.5	0.715299	0.907709	0.241244		104.5	-741.397	-1813.17	-1512.38
24.6	0.715299	0.908509	0.242906		104.6	-726.451	-1787.64	-1505.53
24.7	0.704154	0.91091	0.246587		104.7	-718.978	-1781.1	-1505.21
24.8	0.70922	0.911977	0.262258		104.8	-696.247	-1759.61	-1517.05
24.9	0.714286	0.910643	0.269856		104.9	-681.301	-1743.73	-1529.5
25	0.700101	0.911977	0.265582		105	-664.175	-1732.83	-1549.43
25.1	0.707194	0.916244	0.273655		105.1	-652.965	-1693.6	-1548.81
25.2	0.716312	0.917311	0.277217		105.2	-647.36	-1652.5	-1541.96
25.3	0.712259	0.915444	0.281372		105.3	-633.66	-1641.29	-1536.35
25.4	0.724417	0.917045	0.278642		105.4	-625.252	-1634.75	-1538.84
25.5	0.725431	0.920245	0.280541		105.5	-617.156	-1616.38	-1539.47
25.6	0.712259	0.922646	0.286715		105.6	-595.983	-1586.17	-1545.38
25.7	0.72847	0.919712	0.282322		105.7	-587.575	-1560.64	-1538.84
25.8	0.73151	0.918378	0.283866		105.8	-575.431	-1539.47	-1534.48
25.9	0.716312	0.919979	0.286596		105.9	-561.731	-1515.8	-1536.35
26	0.72847	0.923713	0.290277		106	-536.509	-1496.5	-1540.4
26.1	0.724417	0.927181	0.289327		106.1	-510.664	-1468.16	-1547.56
26.2	0.723404	0.928781	0.286359		106.2	-479.838	-1437.02	-1543.2
26.3	0.717325	0.928781	0.287665		106.3	-459.598	-1408.06	-1559.08
26.4	0.744681	0.927981	0.289446		106.4	-451.813	-1379.73	-1548.5
26.5	0.72847	0.92398	0.296925		106.5	-442.472	-1349.83	-1541.96
26.6	0.725431	0.92398	0.308204		106.6	-436.556	-1319.63	-1538.22
26.7	0.743668	0.922646	0.31414		106.7	-426.28	-1292.54	-1537.91
26.8	0.743668	0.921846	0.316989		106.8	-404.172	-1264.83	-1522.65
26.9	0.743668	0.920512	0.317583		106.9	-383.621	-1235.25	-1532.3
27	0.735562	0.921846	0.316277		107	-373.034	-1193.52	-1540.09
27.1	0.734549	0.920779	0.318533		107.1	-364.004	-1160.2	-1543.2
27.2	0.743668	0.92558	0.323163		107.2	-345.01	-1132.49	-1550.36
27.3	0.74772	0.928248	0.325418		107.3	-336.291	-1110.07	-1541.02
27.4	0.741641	0.930115	0.326368		107.4	-332.555	-1078.31	-1552.23
27.5	0.754813	0.930381	0.332542		107.5	-323.836	-1059.32	-1553.17
27.6	0.75076	0.923713	0.33646		107.6	-316.674	-1051.22	-1545.38
27.7	0.73151	0.928248	0.336697		107.7	-301.105	-1031.92	-1541.65
27.8	0.730496	0.927981	0.337409		107.8	-285.536	-1000.47	-1535.42
27.9	0.729483	0.927981	0.338478		107.9	-271.524	-989.256	-1528.26
28	0.749747	0.931448	0.343346		108	-267.476	-968.082	-1531.68
28.1	0.766971	0.935449	0.348807		108.1	-266.853	-953.447	-1540.09
28.2	0.753799	0.935716	0.345126		108.2	-262.805	-944.417	-1546.94
28.3	0.748734	0.934916	0.338597		108.3	-252.53	-922.309	-1543.83
28.4	0.764944	0.937317	0.342277		108.4	-250.661	-894.285	-1529.5
28.5	0.736575	0.937583	0.347501		108.5	-247.548	-868.752	-1533.24
28.6	0.761905	0.933582	0.348926		108.6	-242.566	-856.297	-1522.03
28.7	0.749747	0.93625	0.356168		108.7	-239.452	-827.027	-1513.31
28.8	0.749747	0.939184	0.357948		108.8	-223.883	-796.823	-1514.56
28.9	0.746707	0.937583	0.360323		108.9	-213.918	-781.254	-1500.23
29	0.753799	0.938917	0.35225		109	-213.918	-772.224	-1488.71
29.1	0.77001	0.93865	0.359848		109.1	-216.098	-759.769	-1480.61
29.2	0.772036	0.938117	0.365309		109.2	-220.457	-744.2	-1478.12
29.3	0.77001	0.936783	0.362222		109.3	-212.673	-734.236	-1465.98
29.4	0.777102	0.938917	0.361035		109.4	-211.116	-713.062	-1467.54
29.5	0.780142	0.939984	0.357236		109.5	-206.445	-676.007	-1464.73
29.6	0.780142	0.943985	0.364597		109.6	-206.757	-642.067	-1454.77
29.7	0.784195	0.945319	0.368277		109.7	-203.643	-634.282	-1456.02
29.8	0.766971	0.949587	0.367565		109.8	-193.679	-624.007	-1456.95
29.9	0.772036	0.951454	0.376113		109.9	-191.188	-608.438	-1436.4
30	0.775076	0.95092	0.368752		110	-184.337	-587.264	-1440.76
30.1	0.774063	0.95172	0.364716		110.1	-176.241	-572.318	-1431.42
30.2	0.758865	0.953588	0.366378		110.2	-176.864	-554.88	-1419.58
30.3	0.752786	0.950387	0.369939		110.3	-166.277	-529.347	-1423.32
30.4	0.754813	0.947453	0.37362		110.4	-156.624	-508.796	-1414.91
30.5	0.760892	0.948786	0.377894		110.5	-147.594	-482.64	-1412.73
30.6	0.756839	0.949853	0.382168		110.6	-147.594	-464.58	-1404.33
30.7	0.762918	0.94852	0.380031		110.7	-148.529	-451.191	-1399.34
30.8	0.767984	0.94852	0.375401		110.8	-146.038	-433.13	-1399.03
30.9	0.777102	0.953321	0.370177		110.9	-139.499	-420.052	-1390.94
31	0.776089	0.950653	0.372433		111	-129.846	-410.711	-1387.82
31.1	0.775076	0.95172	0.386798		111.1	-125.175	-402.615	-1390
31.2	0.784195	0.94932	0.394515		111.2	-122.995	-387.046	-1381.28
31.3	0.790274	0.953054	0.389766		111.3	-122.373	-372.723	-1373.5
31.4	0.783181	0.953054	0.384186		111.4	-119.259	-365.249	-1358.55
31.5	0.779129	0.95172	0.38751		111.5	-117.702	-359.022	-1357.31
31.6	0.788247	0.954388	0.394278		111.6	-109.917	-343.764	-1363.85
31.7	0.78926	0.95012	0.395109		111.7	-105.247	-330.998	-1353.26
31.8	0.791287	0.95172	0.402944		111.8	-102.133	-321.345	-1350.15
31.9	0.801418	0.950387	0.399145		111.9	-93.7256	-305.776	-1349.52
32	0.798379	0.949853	0.393684		112	-88.7435	-306.71	-1345.48
32.1	0.798379	0.94932	0.39594		112.1	-87.1866	-302.973	-1325.86
32.2	0.807498	0.95172	0.397008		112.2	-86.2524	-294.877	-1314.65
32.3	0.806484	0.953321	0.394159		112.3	-86.5638	-291.452	-1323.99
32.4	0.805471	0.950387	0.396296		112.4	-82.5159	-281.177	-1318.7
32.5	0.807498	0.952254	0.394871		112.5	-77.8452	-272.769	-1310.91
32.6	0.818642	0.95012	0.401638		112.6	-75.9769	-263.739	-1315.89
32.7	0.823708	0.951187	0.402826		112.7	-72.2403	-260.003	-1314.65
32.8	0.806484	0.954655	0.400095		112.8	-71.6175	-257.2	-1298.77
32.9	0.827761	0.955455	0.397483		112.9	-71.6175	-255.332	-1305.62
33	0.812563	0.956788	0.40057		113	-72.5517	-238.206	-1303.44
33.1	0.817629	0.953588	0.399383		113.1	-72.2403	-231.044	-1291.92
33.2	0.822695	0.952254	0.39499		113.2	-68.8151	-227.931	-1285.69
33.3	0.827761	0.953588	0.399026		113.3	-74.7314	-228.242	-1288.49
33.4	0.820669	0.953854	0.398195		113.4	-73.1744	-226.996	-1267.94
33.5	0.817629	0.95172	0.400689		113.5	-72.8631	-224.505	-1273.24
33.6	0.805471	0.957322	0.403894		113.6	-70.9948	-217.655	-1278.84
33.7	0.813577	0.955988	0.402469		113.7	-70.372	-212.984	-1270.43
33.8	0.81155	0.956788	0.401757		113.8	-71.6175	-212.362	-1251.75
33.9	0.81459	0.956788	0.403419		113.9	-72.2403	-208.314	-1249.57
34	0.829787	0.956522	0.4071		114	-68.1924	-203.332	-1242.41
34.1	0.828774	0.955988	0.413036		114.1	-67.5696	-204.266	-1243.97
34.2	0.816616	0.959189	0.41173		114.2	-67.5696	-203.332	-1243.65
34.3	0.829787	0.959723	0.41826		114.3	-57.294	-203.02	-1249.57
34.4	0.829787	0.959723	0.425976		114.4	-59.1623	-197.104	-1246.46
34.5	0.822695	0.958656	0.416479		114.5	-57.6054	-185.271	-1240.54
34.6	0.837893	0.957855	0.416835		114.6	-56.6713	-186.517	-1226.84
34.7	0.818642	0.958656	0.428113		114.7	-60.0965	-189.008	-1211.27
34.8	0.829787	0.959989	0.427876		114.8	-56.6713	-186.828	-1201.31
34.9	0.829787	0.963457	0.427995		114.9	-51.0664	-174.062	-1195.39
35	0.823708	0.962657	0.430013		115	-52.6233	-172.193	-1207.53
35.1	0.83384	0.963457	0.432506		115.1	-56.9827	-175.93	-1200.37
35.2	0.841945	0.96159	0.427639		115.2	-54.4916	-170.637	-1187.61
35.3	0.825735	0.957055	0.424552		115.3	-58.8509	-160.672	-1186.05
35.4	0.83384	0.961323	0.424314		115.4	-55.1144	-163.786	-1173.9
35.5	0.848024	0.959989	0.422177		115.5	-52.6233	-166.277	-1174.22
35.6	0.848024	0.961323	0.425264		115.6	-53.2461	-168.768	-1160.2
35.7	0.860182	0.959723	0.433575		115.7	-55.1144	-161.918	-1149.62
35.8	0.848024	0.959989	0.43678		115.8	-55.1144	-164.098	-1151.49
35.9	0.857143	0.955188	0.43405		115.9	-51.0664	-166.9	-1143.08
36	0.860182	0.959189	0.435474		116	-53.8688	-167.211	-1148.68
36.1	0.863222	0.959456	0.441885		116.1	-48.5754	-169.391	-1147.75
36.2	0.858156	0.961323	0.445684		116.2	-44.8388	-170.014	-1135.29
36.3	0.844985	0.965858	0.447228		116.3	-55.7371	-168.146	-1128.75
36.4	0.855117	0.96239	0.44889		116.4	-56.6713	-162.541	-1126.26
36.5	0.839919	0.960256	0.447584		116.5	-57.9168	-156.624	-1123.15
36.6	0.858156	0.957055	0.443072		116.6	-53.2461	-160.984	-1120.66
36.7	0.855117	0.957589	0.440579		116.7	-47.9526	-151.642	-1118.17
36.8	0.854103	0.959456	0.44426		116.8	-52.6233	-144.169	-1123.46
36.9	0.863222	0.959989	0.450077		116.9	-51.3778	-150.085	-1115.05
37	0.860182	0.96319	0.448652		117	-50.4437	-147.283	-1112.87
37.1	0.85613	0.962657	0.45542		117.1	-49.8209	-147.283	-1105.4
37.2	0.860182	0.96319	0.455182		117.2	-49.1981	-141.678	-1102.91
37.3	0.859169	0.963724	0.455538		117.3	-49.1981	-139.499	-1103.22
37.4	0.859169	0.96159	0.456013		117.4	-50.4437	-142.301	-1092.95
37.5	0.867275	0.956788	0.455301		117.5	-48.5754	-148.217	-1083.92
37.6	0.869301	0.954655	0.455182		117.6	-50.4437	-148.217	-1096.06
37.7	0.854103	0.954921	0.45542		117.7	-47.9526	-146.349	-1097.31
37.8	0.85309	0.956788	0.460525		117.8	-49.1981	-146.972	-1082.98
37.9	0.849038	0.958122	0.458032		117.9	-51.3778	-144.169	-1074.26
38	0.869301	0.958122	0.459694		118	-50.755	-141.367	-1073.33
38.1	0.85309	0.959989	0.46005		118.1	-49.1981	-140.744	-1070.22
38.2	0.865248	0.958656	0.458269		118.2	-50.1323	-141.055	-1071.15
38.3	0.876393	0.957855	0.462068		118.3	-49.1981	-134.205	-1068.35
38.4	0.876393	0.959723	0.462899		118.4	-46.7071	-135.451	-1059.32
38.5	0.880446	0.961056	0.458625		118.5	-44.216	-130.78	-1060.25
38.6	0.869301	0.96159	0.4572		118.6	-46.7071	-131.091	-1051.84
38.7	0.871327	0.96319	0.457557		118.7	-44.8388	-128.6	-1053.71
38.8	0.865248	0.963457	0.465511		118.8	-39.8567	-132.337	-1056.83
38.9	0.863222	0.962123	0.464443		118.9	-37.6771	-136.073	-1040.95
39	0.866261	0.961056	0.461712		119	-42.0364	-141.678	-1029.11
39.1	0.861196	0.96319	0.46373		119.1	-41.725	-141.99	-1028.18
39.2	0.868288	0.963457	0.464917		119.2	-42.6591	-141.678	-1030.67
39.3	0.870314	0.962123	0.469191		119.3	-39.5453	-140.744	-1035.34
39.4	0.87234	0.962923	0.464799		119.4	-35.186	-133.894	-1035.96
39.5	0.869301	0.961323	0.463493		119.5	-33.9405	-133.582	-1029.74
39.6	0.867275	0.961323	0.466698		119.6	-37.0543	-129.534	-1031.29
39.7	0.871327	0.959189	0.463018		119.7	-38.9226	-126.109	-1021.64
39.8	0.885512	0.962657	0.465749		119.8	-41.725	-122.995	-1021.95
39.9	0.885512	0.964257	0.469785		119.9	-39.5453	-124.552	-1026.31
40	0.895643	0.963457	0.467529		120	-44.5274	-125.175	-1014.17
40.1	0.891591	0.962923	0.466698		120.1	-36.4315	-127.666	-1025.38
40.2	0.895643	0.962123	0.469191		120.2	-39.8567	-124.241	-1025.69
40.3	0.893617	0.96159	0.46931		120.3	-36.4315	-122.684	-1022.57
40.4	0.898683	0.96159	0.469904		120.4	-37.0543	-125.175	-1011.36
40.5	0.888551	0.964791	0.473347		120.5	-35.4974	-127.977	-1001.4
40.6	0.892604	0.963457	0.476434		120.6	-37.3657	-122.684	-1002.02
40.7	0.888551	0.961056	0.477027		120.7	-40.7909	-125.486	-1004.51
40.8	0.887538	0.962923	0.480945		120.8	-33.9405	-126.109	-1015.41
40.9	0.896657	0.96399	0.482014		120.9	-31.4494	-121.438	-1010.43
41	0.889564	0.963724	0.481776		121	-37.0543	-111.163	-1010.43
41.1	0.902736	0.966124	0.479402		121.1	-33.9405	-111.163	-998.598
41.2	0.898683	0.963457	0.487119		121.2	-34.8746	-117.39	-996.729
41.3	0.898683	0.963457	0.489018		121.3	-38.6112	-119.57	-989.568
41.4	0.891591	0.959189	0.489849		121.4	-33.6291	-122.684	-986.142
41.5	0.902736	0.957589	0.488068		121.5	-35.4974	-122.061	-983.34
41.6	0.89767	0.957589	0.484151		121.6	-35.4974	-115.211	-972.442
41.7	0.898683	0.954655	0.484151		121.7	-30.5153	-114.277	-973.064
41.8	0.89767	0.955721	0.492342		121.8	-31.1381	-106.492	-973.376
41.9	0.888551	0.958656	0.50184		121.9	-37.0543	-108.983	-967.148
42	0.887538	0.957589	0.50184		122	-32.695	-105.558	-963.1
42.1	0.881459	0.959989	0.501128		122.1	-31.1381	-108.36	-969.016
42.2	0.877406	0.960523	0.493173		122.2	-30.5153	-105.247	-963.412
42.3	0.888551	0.962923	0.491274		122.3	-34.2519	-109.917	-970.262
42.4	0.896657	0.965858	0.497091		122.4	-36.4315	-109.917	-971.196
42.5	0.887538	0.964524	0.502671		122.5	-31.4494	-106.804	-969.951
42.6	0.895643	0.960256	0.50279		122.6	-31.4494	-104.313	-967.771
42.7	0.896657	0.963724	0.498516		122.7	-33.6291	-107.426	-964.969
42.8	0.898683	0.965591	0.500059		122.8	-36.1202	-104.313	-971.196
42.9	0.906788	0.961856	0.50184		122.9	-36.1202	-106.181	-968.705
43	0.885512	0.96319	0.501009		123	-27.0901	-112.72	-957.495
43.1	0.891591	0.964257	0.501009		123.1	-30.2039	-109.295	-951.579
43.2	0.899696	0.965858	0.500297		123.2	-30.5153	-113.343	-965.591
43.3	0.888551	0.964257	0.506114		123.3	-34.5632	-112.097	-963.1
43.4	0.885512	0.965591	0.50184		123.4	-29.5812	-108.049	-953.136
43.5	0.892604	0.966391	0.494123		123.5	-31.4494	-115.211	-949.711
43.6	0.89463	0.970926	0.493292		123.6	-33.3177	-119.259	-944.729
43.7	0.883485	0.965591	0.49721		123.7	-33.6291	-114.899	-947.843
43.8	0.89463	0.964257	0.507658		123.8	-35.186	-112.408	-935.076
43.9	0.896657	0.965591	0.508489		123.9	-31.1381	-117.39	-925.735
44	0.891591	0.962123	0.50647		124	-33.3177	-114.277	-925.423
44.1	0.903749	0.964791	0.510744		124.1	-32.695	-106.492	-930.717
44.2	0.891591	0.965057	0.509795		124.2	-30.8267	-104.313	-931.028
44.3	0.886525	0.965591	0.509082		124.3	-31.4494	-106.804	-923.866
44.4	0.89767	0.963724	0.511575		124.4	-22.7308	-106.492	-916.082
44.5	0.89463	0.963457	0.516324		124.5	-24.2877	-108.36	-915.148
44.6	0.898683	0.964791	0.515731		124.6	-29.8925	-108.36	-922.932
44.7	0.899696	0.965858	0.517155		124.7	-29.5812	-108.672	-923.866
44.8	0.905775	0.96319	0.520005		124.8	-26.7787	-108.672	-922.621
44.9	0.89767	0.96239	0.51858		124.9	-33.0063	-105.247	-911.722
45	0.895643	0.962123	0.516443		125	-32.3836	-113.031	-911.722
45.1	0.890578	0.96399	0.519649		125.1	-27.7129	-114.277	-915.459
45.2	0.891591	0.96159	0.519886		125.2	-24.5991	-107.738	-918.884
45.3	0.89463	0.966124	0.51668		125.3	-28.0243	-115.834	-907.986
45.4	0.892604	0.969058	0.520598		125.4	-31.1381	-105.558	-898.644
45.5	0.901722	0.967991	0.524754		125.5	-25.2218	-106.492	-900.513
45.6	0.885512	0.968258	0.524872		125.6	-27.7129	-108.36	-901.447
45.7	0.887538	0.969592	0.520836		125.7	-28.0243	-108.36	-891.483
45.8	0.878419	0.971992	0.521073		125.8	-30.2039	-103.69	-900.824
45.9	0.886525	0.968792	0.524041		125.9	-23.0422	-108.049	-908.297
46	0.893617	0.967725	0.522498		126	-23.6649	-113.031	-898.022
46.1	0.890578	0.968792	0.52226		126.1	-22.108	-110.54	-904.249
46.2	0.885512	0.965858	0.52784		126.2	-27.4015	-106.492	-904.872
46.3	0.881459	0.96319	0.523329		126.3	-23.6649	-113.031	-895.842
46.4	0.89767	0.959989	0.524516		126.4	-20.8625	-115.834	-898.022
46.5	0.891591	0.959989	0.524991		126.5	-25.2218	-113.965	-893.04
46.6	0.888551	0.963457	0.520005		126.6	-26.156	-107.426	-888.68
46.7	0.885512	0.961323	0.519649		126.7	-22.7308	-107.738	-893.04
46.8	0.893617	0.959989	0.518105		126.8	-21.1739	-107.115	-891.171
46.9	0.889564	0.96079	0.517274		126.9	-26.4674	-109.917	-886.812
47	0.887538	0.959989	0.521311		127	-25.5332	-112.097	-885.878
47.1	0.893617	0.959189	0.525229		127.1	-25.2218	-107.426	-885.878
47.2	0.890578	0.955455	0.519174		127.2	-29.2698	-114.899	-883.387
47.3	0.891591	0.957055	0.524041		127.3	-25.5332	-107.738	-877.159
47.4	0.887538	0.956788	0.524872		127.4	-23.3535	-104.935	-874.98
47.5	0.888551	0.952787	0.523804		127.5	-25.5332	-112.72	-879.65
47.6	0.893617	0.953854	0.528909		127.6	-24.2877	-111.474	-876.225
47.7	0.891591	0.950387	0.530809		127.7	-26.7787	-108.049	-879.028
47.8	0.891591	0.947186	0.529503		127.8	-23.0422	-114.588	-881.519
47.9	0.893617	0.949053	0.525703		127.9	-22.108	-111.786	-880.896
48	0.896657	0.95092	0.521429		128	-22.108	-108.049	-877.471
48.1	0.899696	0.951454	0.528553		128.1	-26.156	-109.606	-876.536
48.2	0.905775	0.952521	0.535083		128.2	-23.6649	-113.031	-876.225
48.3	0.889564	0.954388	0.53532		128.3	-21.1739	-108.672	-884.321
48.4	0.896657	0.955188	0.531877		128.4	-25.2218	-112.72	-881.207
48.5	0.892604	0.954388	0.534608		128.5	-21.1739	-118.636	-886.189
48.6	0.896657	0.955721	0.535676		128.6	-24.5991	-116.768	-880.273
48.7	0.89463	0.954921	0.532471		128.7	-21.4853	-113.343	-875.914
48.8	0.906788	0.957322	0.532233		128.8	-25.5332	-112.097	-877.159
48.9	0.902736	0.954121	0.523804		128.9	-23.0422	-112.408	-876.536
49	0.893617	0.953321	0.520836		129	-22.4194	-114.588	-871.554
49.1	0.890578	0.951187	0.528078		129.1	-31.4494	-112.408	-876.225
49.2	0.902736	0.952521	0.52784		129.2	-23.9763	-114.588	-874.98
49.3	0.902736	0.954655	0.529028		129.3	-22.7308	-116.768	-872.8
49.4	0.888551	0.953054	0.535557		129.4	-24.9104	-111.163	-872.489
49.5	0.908815	0.955721	0.535439		129.5	-27.7129	-109.606	-869.063
49.6	0.907801	0.957055	0.53627		129.6	-23.0422	-106.492	-879.028
49.7	0.919959	0.958389	0.539119		129.7	-26.4674	-105.247	-882.453
49.8	0.906788	0.961056	0.534251		129.8	-20.8625	-106.492	-874.045
49.9	0.907801	0.961856	0.538644		129.9	-24.5991	-104.624	-878.405
50	0.924012	0.96239	0.541731		130	-26.156	-107.115	-879.339
50.1	0.924012	0.962923	0.542799		130.1	-18.6828	-99.9532	-873.734
50.2	0.918946	0.958922	0.546242		130.2	-20.5511	-102.133	-870.932
50.3	0.921986	0.958656	0.544105		130.3	-25.2218	-103.067	-859.722
50.4	0.922999	0.961856	0.547667		130.4	-22.4194	-103.378	-851.315
50.5	0.931104	0.962923	0.544936		130.5	-24.5991	-96.2166	-846.644
50.6	0.926039	0.96239	0.543274		130.6	-22.7308	-95.9052	-841.039
50.7	0.918946	0.96079	0.548261		130.7	-23.0422	-96.528	-848.824
50.8	0.921986	0.961323	0.551585		130.8	-28.9584	-98.0849	-854.117
50.9	0.922999	0.96399	0.545886		130.9	-25.5332	-96.8394	-854.117
51	0.920973	0.962657	0.546361		131	-27.0901	-96.8394	-854.74
51.1	0.928065	0.961323	0.547786		131.1	-23.3535	-104.313	-851.626
51.2	0.930091	0.959723	0.542681		131.2	-24.9104	-92.1687	-843.53
51.3	0.924012	0.959723	0.550635		131.3	-30.5153	-96.528	-849.446
51.4	0.918946	0.959723	0.552416		131.4	-30.2039	-96.8394	-851.626
51.5	0.917933	0.961323	0.549804		131.5	-29.8925	-93.7256	-846.021
51.6	0.919959	0.958656	0.553722		131.6	-31.7608	-102.756	-841.35
51.7	0.912867	0.958656	0.556334		131.7	-29.5812	-106.804	-848.512
51.8	0.915907	0.960256	0.555503		131.8	-27.4015	-109.606	-849.446
51.9	0.914894	0.958922	0.555028		131.9	-26.156	-108.36	-838.548
52	0.91388	0.957589	0.557877		132	-25.5332	-109.917	-838.548
52.1	0.903749	0.957589	0.555147		132.1	-23.9763	-108.36	-835.746
52.2	0.911854	0.954655	0.552653		132.2	-24.5991	-113.031	-839.171
52.3	0.911854	0.956255	0.554078		132.3	-22.4194	-108.049	-835.123
52.4	0.905775	0.954121	0.554909		132.4	-28.647	-104.624	-842.596
52.5	0.906788	0.953588	0.549923		132.5	-29.5812	-99.6418	-836.368
52.6	0.909828	0.956255	0.549804		132.6	-24.2877	-104.935	-837.614
52.7	0.904762	0.959456	0.55479		132.7	-28.647	-104.313	-823.602
52.8	0.907801	0.962123	0.558471		132.8	-26.4674	-105.869	-820.799
52.9	0.914894	0.962123	0.553959		132.9	-23.3535	-105.247	-830.452
53	0.921986	0.962923	0.552535		133	-23.3535	-102.444	-830.763
53.1	0.912867	0.965591	0.556096		133.1	-29.2698	-102.756	-829.518
53.2	0.907801	0.958656	0.563813		133.2	-25.2218	-98.0849	-817.686
53.3	0.918946	0.959456	0.564288		133.3	-27.7129	-93.4142	-817.063
53.4	0.910841	0.960523	0.562389		133.4	-24.2877	-98.0849	-815.194
53.5	0.921986	0.96159	0.563457		133.5	-24.9104	-96.528	-815.194
53.6	0.921986	0.960256	0.559896		133.6	-23.9763	-94.0369	-807.41
53.7	0.910841	0.955721	0.558115		133.7	-25.2218	-92.48	-805.23
53.8	0.912867	0.955721	0.558946		133.8	-27.0901	-92.48	-811.458
53.9	0.904762	0.960523	0.559539		133.9	-23.6649	-92.1687	-824.847
54	0.903749	0.958389	0.561439		134	-26.156	-93.4142	-819.865
54.1	0.911854	0.958656	0.561201		134.1	-26.4674	-96.2166	-809.278
54.2	0.904762	0.960256	0.555621		134.2	-20.5511	-98.3963	-817.374
54.3	0.911854	0.954388	0.556927		134.3	-27.4015	-98.7077	-816.751
54.4	0.91388	0.955188	0.555265		134.4	-27.0901	-94.3483	-817.374
54.5	0.906788	0.957855	0.551822		134.5	-27.7129	-98.7077	-816.751
54.6	0.906788	0.958389	0.554078		134.6	-29.8925	-98.7077	-811.147
54.7	0.912867	0.957589	0.552179		134.7	-25.8446	-97.1508	-812.081
54.8	0.930091	0.959456	0.557165		134.8	-28.647	-101.199	-817.997
54.9	0.922999	0.961056	0.557521		134.9	-28.3356	-99.3304	-816.751
55	0.924012	0.962657	0.552535		135	-25.5332	-96.528	-816.751
55.1	0.927052	0.958122	0.551229		135.1	-23.6649	-95.9052	-815.817
55.2	0.914894	0.957055	0.548854		135.2	-24.9104	-93.1028	-809.278
55.3	0.926039	0.959989	0.548617		135.3	-25.2218	-96.8394	-817.686
55.4	0.925025	0.961323	0.54458		135.4	-31.1381	-93.7256	-822.356
55.5	0.91388	0.96319	0.546955		135.5	-26.156	-97.1508	-815.817
55.6	0.918946	0.965057	0.546005		135.6	-24.5991	-93.1028	-818.931
55.7	0.914894	0.965858	0.542799		135.7	-24.2877	-92.1687	-814.883
55.8	0.917933	0.966658	0.541731		135.8	-27.4015	-95.5938	-811.769
55.9	0.911854	0.968258	0.54743		135.9	-26.156	-96.2166	-816.44
56	0.917933	0.965591	0.550516		136	-29.2698	-96.528	-814.883
56.1	0.920973	0.964524	0.554434		136.1	-23.3535	-97.4621	-817.374
56.2	0.922999	0.966391	0.552891		136.2	-28.9584	-100.265	-822.979
56.3	0.912867	0.967725	0.551822		136.3	-28.647	-98.7077	-811.147
56.4	0.919959	0.963724	0.547311		136.4	-27.0901	-93.1028	-808.967
56.5	0.920973	0.963724	0.546599		136.5	-26.4674	-87.1866	-800.871
56.6	0.914894	0.966924	0.548498		136.6	-29.8925	-94.0369	-802.739
56.7	0.928065	0.968792	0.559064		136.7	-27.7129	-93.1028	-802.428
56.8	0.91692	0.970392	0.558827		136.8	-23.0422	-92.7914	-799.314
56.9	0.918946	0.968258	0.561795		136.9	-26.7787	-94.0369	-803.985
57	0.917933	0.966924	0.561201		137	-26.7787	-87.1866	-796.512
57.1	0.935157	0.966924	0.560727		137.1	-23.3535	-89.6776	-798.38
57.2	0.930091	0.966391	0.56322		137.2	-24.5991	-88.4321	-808.033
57.3	0.920973	0.968792	0.558233		137.3	-28.9584	-84.3841	-803.673
57.4	0.918946	0.968792	0.563101		137.4	-29.8925	-85.0069	-800.871
57.5	0.929078	0.965324	0.560845		137.5	-26.156	-84.6955	-799.625
57.6	0.926039	0.971726	0.562033		137.6	-24.2877	-92.1687	-799.937
57.7	0.919959	0.970392	0.5669		137.7	-28.647	-98.7077	-799.625
57.8	0.930091	0.967191	0.572718		137.8	-28.0243	-97.7735	-801.805
57.9	0.920973	0.966124	0.570699		137.9	-29.8925	-89.6776	-794.955
58	0.937183	0.968258	0.568562		138	-29.5812	-89.0549	-791.218
58.1	0.93617	0.970125	0.570699		138.1	-29.8925	-86.8752	-788.416
58.2	0.937183	0.967991	0.571649		138.2	-28.0243	-88.1207	-790.284
58.3	0.928065	0.965858	0.573074		138.3	-26.7787	-92.1687	-784.991
58.4	0.924012	0.966391	0.570343		138.4	-26.7787	-93.1028	-783.434
58.5	0.931104	0.966658	0.563813		138.5	-28.647	-96.8394	-781.877
58.6	0.917933	0.966924	0.568562		138.6	-28.647	-96.2166	-788.727
58.7	0.927052	0.966124	0.572955		138.7	-27.7129	-94.9711	-791.53
58.8	0.929078	0.965858	0.57711		138.8	-24.5991	-91.8573	-792.464
58.9	0.918946	0.970659	0.574617		138.9	-26.7787	-94.9711	-795.266
59	0.919959	0.972259	0.57438		139	-26.156	-93.7256	-787.17
59.1	0.930091	0.969325	0.574142		139.1	-26.156	-86.8752	-783.745
59.2	0.928065	0.971992	0.574617		139.2	-23.6649	-86.8752	-785.613
59.3	0.915907	0.969058	0.576398		139.3	-23.6649	-91.2345	-781.254
59.4	0.920973	0.966391	0.579603		139.4	-27.7129	-96.2166	-784.368
59.5	0.914894	0.966124	0.577348		139.5	-30.2039	-94.9711	-782.188
59.6	0.912867	0.964524	0.574261		139.6	-24.9104	-100.265	-773.781
59.7	0.911854	0.966391	0.576992		139.7	-21.4853	-103.378	-781.254
59.8	0.899696	0.969325	0.579247		139.8	-26.4674	-99.019	-773.158
59.9	0.899696	0.965858	0.576517		139.9	-23.9763	-101.199	-769.422
60	0.91692	0.967191	0.574617		140	-26.7787	-101.51	-764.439
60.1	0.907801	0.970125	0.574023		140.1	-23.9763	-102.444	-772.847
60.2	0.912867	0.965591	0.576754		140.2	-25.8446	-104.624	-774.092
60.3	0.915907	0.968792	0.586608		140.3	-27.0901	-100.887	-770.356
60.4	0.906788	0.967191	0.58732		140.4	-27.7129	-101.821	-775.961
60.5	0.903749	0.966658	0.590763		140.5	-27.4015	-91.2345	-773.469
60.6	0.911854	0.966924	0.594325		140.6	-27.4015	-88.1207	-765.062
60.7	0.924012	0.967458	0.591594		140.7	-25.5332	-93.1028	-767.865
60.8	0.919959	0.966658	0.588983		140.8	-24.5991	-90.3004	-765.062
60.9	0.915907	0.96239	0.586727		140.9	-26.7787	-94.9711	-761.014
61	0.927052	0.964524	0.590763		141	-28.0243	-87.1866	-762.571
61.1	0.914894	0.965858	0.5948		141.1	-21.7966	-86.5638	-770.978
61.2	0.926039	0.96399	0.591001		141.2	-26.156	-85.9411	-767.553
61.3	0.911854	0.966391	0.579247		141.3	-28.0243	-91.2345	-769.733
61.4	0.905775	0.962657	0.578535		141.4	-26.4674	-86.5638	-766.308
61.5	0.912867	0.960256	0.58922		141.5	-23.3535	-84.0728	-764.439
61.6	0.917933	0.959989	0.595394		141.6	-22.7308	-89.6776	-751.984
61.7	0.915907	0.959723	0.5948		141.7	-23.6649	-88.4321	-753.541
61.8	0.912867	0.962923	0.594088		141.8	-23.0422	-88.4321	-755.721
61.9	0.912867	0.96159	0.591001		141.9	-26.7787	-88.1207	-754.164
62	0.915907	0.962123	0.588864		142	-28.0243	-86.8752	-752.607
62.1	0.909828	0.960523	0.589814		142.1	-27.7129	-79.7134	-760.08
62.2	0.905775	0.959723	0.591357		142.2	-28.9584	-84.0728	-755.721
62.3	0.910841	0.960256	0.589576		142.3	-24.9104	-79.0907	-756.344
62.4	0.904762	0.961323	0.5948		142.4	-25.8446	-86.8752	-760.391
62.5	0.908815	0.959989	0.595394		142.5	-27.0901	-86.5638	-753.23
62.6	0.91388	0.962657	0.598836		142.6	-24.5991	-81.5817	-759.146
62.7	0.905775	0.961856	0.602161		142.7	-29.2698	-84.6955	-752.296
62.8	0.905775	0.957855	0.598362		142.8	-30.2039	-86.5638	-744.2
62.9	0.907801	0.961056	0.596225		142.9	-30.2039	-89.3662	-747.625
63	0.917933	0.963457	0.601805		143	-33.9405	-89.6776	-749.805
63.1	0.915907	0.957589	0.599786		143.1	-29.8925	-91.2345	-751.361
63.2	0.915907	0.958922	0.598718		143.2	-30.5153	-89.6776	-747.625
63.3	0.91388	0.96239	0.600973		143.3	-35.8088	-89.6776	-751.673
63.4	0.919959	0.959456	0.599786		143.4	-32.0722	-93.4142	-742.02
63.5	0.915907	0.956788	0.597293		143.5	-30.2039	-90.9231	-740.775
63.6	0.911854	0.957855	0.59385		143.6	-31.7608	-87.498	-739.529
63.7	0.905775	0.958922	0.593138		143.7	-26.156	-86.5638	-745.134
63.8	0.911854	0.959723	0.588389		143.8	-31.4494	-79.7134	-742.02
63.9	0.912867	0.960256	0.590882		143.9	-31.1381	-81.5817	-744.822
64	0.899696	0.960256	0.59017		144	-25.8446	-80.959	-744.511
64.1	0.89767	0.959456	0.593969		144.1	-29.5812	-86.8752	-744.822
64.2	0.912867	0.959189	0.598599		144.2	-26.4674	-79.7134	-743.266
64.3	0.911854	0.959189	0.601448		144.3	-29.2698	-81.2703	-740.152
64.4	0.896657	0.954655	0.598955		144.4	-28.3356	-77.5338	-738.283
64.5	0.909828	0.958122	0.595275		144.5	-26.7787	-79.0907	-734.858
64.6	0.912867	0.961056	0.5948		144.6	-28.647	-80.0248	-733.613
64.7	0.912867	0.962123	0.603229		144.7	-28.0243	-78.4679	-739.218
64.8	0.911854	0.96159	0.609759		144.8	-29.5812	-80.0248	-733.613
64.9	0.922999	0.963724	0.608216		144.9	-26.156	-75.9769	-729.876
65	0.922999	0.960256	0.611421		145	-27.4015	-76.5996	-721.158
65.1	0.91692	0.960256	0.609759		145.1	-21.4853	-82.5159	-721.469
65.2	0.914894	0.961323	0.60311		145.2	-27.4015	-84.0728	-719.912
65.3	0.918946	0.961856	0.606791		145.3	-28.0243	-83.7614	-727.074
65.4	0.915907	0.959989	0.603348		145.4	-20.5511	-83.45	-713.684
65.5	0.921986	0.958122	0.605247		145.5	-25.2218	-86.5638	-709.014
65.6	0.920973	0.954655	0.60964		145.6	-29.2698	-86.8752	-711.505
65.7	0.922999	0.955988	0.612371		145.7	-26.156	-89.989	-713.684
65.8	0.93921	0.953054	0.612964		145.8	-28.647	-82.8272	-714.93
65.9	0.934144	0.953054	0.614745		145.9	-28.0243	-84.0728	-716.798
66	0.927052	0.955455	0.616764		146	-24.9104	-82.5159	-712.439
66.1	0.928065	0.954655	0.610709		146.1	-23.9763	-81.8931	-716.175
66.2	0.920973	0.957055	0.611896		146.2	-23.3535	-80.959	-718.044
66.3	0.922999	0.956255	0.615814		146.3	-23.0422	-83.1386	-709.325
66.4	0.921986	0.955188	0.616882		146.4	-24.5991	-79.0907	-713.684
66.5	0.928065	0.960256	0.61522		146.5	-24.5991	-80.3362	-708.702
66.6	0.93617	0.958922	0.614983		146.6	-19.9284	-83.7614	-705.589
66.7	0.929078	0.957322	0.614745		146.7	-24.9104	-82.5159	-706.523
66.8	0.932118	0.954655	0.611065		146.8	-23.3535	-84.6955	-707.457
66.9	0.929078	0.955455	0.615339		146.9	-24.2877	-90.3004	-710.882
67	0.920973	0.96079	0.620681		147	-27.0901	-89.6776	-707.768
67.1	0.929078	0.961856	0.613914		147.1	-26.156	-89.6776	-711.505
67.2	0.93617	0.96399	0.610353		147.2	-25.8446	-83.7614	-713.684
67.3	0.935157	0.962923	0.611777		147.3	-24.5991	-86.8752	-710.882
67.4	0.942249	0.961056	0.613439		147.4	-21.4853	-87.1866	-707.457
67.5	0.934144	0.961856	0.614389		147.5	-23.0422	-83.45	-700.606
67.6	0.938197	0.961323	0.613439		147.6	-25.5332	-83.45	-703.72
67.7	0.944276	0.960523	0.614508		147.7	-28.0243	-80.3362	-700.295
67.8	0.922999	0.963724	0.610827		147.8	-24.9104	-78.1565	-707.457
67.9	0.919959	0.964257	0.614033		147.9	-28.3356	-84.0728	-707.457
68	0.930091	0.966924	0.611659		148	-25.5332	-83.7614	-712.128
68.1	0.945289	0.961056	0.613439		148.1	-28.3356	-84.0728	-706.523
68.2	0.934144	0.959189	0.616407		148.2	-25.2218	-78.7793	-704.343
68.3	0.926039	0.958389	0.620681		148.3	-23.3535	-80.959	-705.589
68.4	0.931104	0.957589	0.61985		148.4	-23.0422	-76.911	-705.9
68.5	0.920973	0.962123	0.622225		148.5	-24.9104	-80.0248	-709.014
68.6	0.935157	0.960523	0.626024		148.6	-22.7308	-79.0907	-704.032
68.7	0.938197	0.958389	0.62828		148.7	-21.1739	-80.3362	-699.049
68.8	0.934144	0.96239	0.630179		148.8	-23.0422	-77.2224	-705.277
68.9	0.93921	0.96239	0.624362		148.9	-21.1739	-76.911	-702.786
69	0.940223	0.959723	0.624243		149	-19.9284	-79.7134	-697.493
69.1	0.935157	0.961323	0.623531		149.1	-26.156	-77.8452	-695.624
69.2	0.945289	0.96159	0.623293		149.2	-23.6649	-82.5159	-690.642
69.3	0.956434	0.964791	0.625668		149.3	-28.3356	-82.8272	-684.415
69.4	0.953394	0.96319	0.62543		149.4	-28.3356	-77.8452	-681.612
69.5	0.95542	0.963457	0.623531		149.5	-26.7787	-77.5338	-687.217
69.6	0.944276	0.967458	0.629348		149.6	-23.6649	-78.1565	-701.229
69.7	0.944276	0.966391	0.626499		149.7	-27.0901	-81.2703	-695.313
69.8	0.945289	0.965057	0.623293		149.8	-26.7787	-85.0069	-691.888
69.9	0.951368	0.964524	0.621987		149.9	-23.9763	-86.5638	-695.002
70	0.938197	0.96399	0.622937		150	-23.9763	-87.498	-689.397
70.1	0.941236	0.965591	0.617951		150.1	-26.7787	-86.8752	-690.954
70.2	0.938197	0.96399	0.624481		150.2	-24.2877	-84.0728	-686.283
70.3	0.935157	0.962923	0.627092		150.3	-24.5991	-84.0728	-684.103
70.4	0.949341	0.96079	0.624837		150.4	-23.0422	-89.6776	-685.349
70.5	0.947315	0.961856	0.621038		150.5	-21.1739	-86.5638	-684.415
70.6	0.956434	0.966658	0.619969		150.6	-23.9763	-84.3841	-686.906
70.7	0.933131	0.963724	0.62175		150.7	-26.156	-79.7134	-696.558
70.8	0.944276	0.96399	0.622462		150.8	-25.2218	-84.0728	-692.199
70.9	0.952381	0.965591	0.621156		150.9	-23.9763	-81.2703	-686.594
71	0.943262	0.965057	0.624243		151	-23.6649	-94.0369	-676.941
71.1	0.949341	0.965591	0.628398		151.1	-26.4674	-89.6776	-679.432
71.2	0.93617	0.966391	0.630417		151.2	-24.9104	-88.4321	-681.612
71.3	0.943262	0.962923	0.628873		151.3	-21.7966	-88.1207	-679.432
71.4	0.934144	0.964791	0.632079		151.4	-27.4015	-88.7435	-683.169
71.5	0.937183	0.962123	0.635166		151.5	-25.5332	-86.8752	-680.055
71.6	0.935157	0.962923	0.629823		151.6	-23.9763	-86.5638	-684.415
71.7	0.931104	0.965591	0.630654		151.7	-24.5991	-82.2045	-685.037
71.8	0.942249	0.967458	0.631248		151.8	-27.4015	-82.5159	-679.432
71.9	0.945289	0.967458	0.629111		151.9	-25.5332	-84.0728	-676.941
72	0.938197	0.965858	0.626261		152	-21.1739	-88.1207	-683.169
72.1	0.941236	0.967725	0.62828		152.1	-24.9104	-89.0549	-682.235
72.2	0.948328	0.966658	0.631841		152.2	-23.6649	-88.7435	-677.564
72.3	0.93921	0.965591	0.631366		152.3	-26.4674	-88.7435	-682.546
72.4	0.941236	0.961856	0.632791		152.4	-27.0901	-88.1207	-677.253
72.5	0.941236	0.961056	0.630892		152.5	-24.5991	-88.1207	-681.301
72.6	0.943262	0.961856	0.632197		152.6	-20.2397	-88.1207	-680.678
72.7	0.952381	0.959723	0.628636		152.7	-19.617	-85.9411	-677.253
72.8	0.946302	0.962123	0.629111		152.8	-22.108	-92.7914	-678.187
72.9	0.946302	0.966658	0.63386		152.9	-23.6649	-98.7077	-676.941
73	0.93921	0.962657	0.627567		153	-24.5991	-90.9231	-674.762
73.1	0.93921	0.965858	0.630654		153.1	-23.3535	-87.8093	-680.678
73.2	0.934144	0.966124	0.628042		153.2	-22.7308	-92.1687	-682.858
73.3	0.937183	0.966924	0.625668		153.3	-24.9104	-92.48	-680.055
73.4	0.934144	0.966924	0.629111		153.4	-27.4015	-92.1687	-678.81
73.5	0.946302	0.968525	0.628398		153.5	-22.7308	-86.2524	-678.81
73.6	0.93921	0.972526	0.626736		153.6	-23.0422	-85.9411	-680.367
73.7	0.95542	0.972526	0.630179		153.7	-25.5332	-84.0728	-687.84
73.8	0.952381	0.971192	0.629467		153.8	-22.4194	-86.2524	-676.007
73.9	0.945289	0.975193	0.629586		153.9	-25.8446	-87.8093	-672.582
74	0.948328	0.976527	0.626974		154	-26.156	-90.6118	-675.073
74.1	0.948328	0.977594	0.62828		154.1	-23.9763	-91.5459	-674.762
74.2	0.93921	0.973059	0.628992		154.2	-22.108	-88.4321	-674.139
74.3	0.948328	0.973326	0.625549		154.3	-22.4194	-94.6597	-672.582
74.4	0.947315	0.975994	0.630298		154.4	-21.4853	-95.2825	-670.402
74.5	0.947315	0.971726	0.642764		154.5	-22.4194	-91.5459	-671.025
74.6	0.951368	0.967725	0.641102		154.6	-21.4853	-97.1508	-676.941
74.7	0.947315	0.969859	0.633741		154.7	-26.7787	-91.5459	-670.402
74.8	0.947315	0.968525	0.630298		154.8	-23.3535	-84.0728	-670.714
74.9	0.947315	0.969592	0.630892		154.9	-22.4194	-85.3183	-668.534
75	0.943262	0.970125	0.629111		155	-25.8446	-87.498	-667.6
75.1	0.93921	0.967725	0.630654		155.1	-27.4015	-88.7435	-657.013
75.2	0.924012	0.968525	0.637896		155.2	-23.6649	-90.9231	-662.618
75.3	0.924012	0.966658	0.635047		155.3	-22.7308	-89.0549	-661.995
75.4	0.942249	0.967725	0.633741		155.4	-25.5332	-85.3183	-657.947
75.5	0.957447	0.968525	0.632672		155.5	-25.5332	-83.7614	-666.043
75.6	0.954407	0.968792	0.632554		155.6	-26.4674	-84.6955	-666.043
75.7	0.942249	0.965858	0.637777		155.7	-25.2218	-84.3841	-665.732
75.8	0.948328	0.967991	0.637184		155.8	-21.4853	-85.9411	-665.42
75.9	0.956434	0.970125	0.634216		155.9	-22.7308	-92.48	-655.145
76	0.93921	0.968792	0.635403		156	-26.7787	-91.2345	-658.881
76.1	0.93921	0.969325	0.639083		156.1	-25.8446	-89.3662	-650.163
76.2	0.950355	0.966391	0.640152		156.2	-26.4674	-87.8093	-649.54
76.3	0.950355	0.967991	0.634928		156.3	-28.0243	-82.5159	-650.474
76.4	0.932118	0.966658	0.633266		156.4	-23.9763	-84.0728	-650.786
76.5	0.949341	0.969592	0.635166		156.5	-26.7787	-83.7614	-653.899
76.6	0.935157	0.973326	0.636353		156.6	-27.0901	-82.2045	-652.654
76.7	0.938197	0.971992	0.636709		156.7	-21.4853	-85.3183	-650.163
76.8	0.9615	0.971992	0.634928		156.8	-26.156	-85.3183	-640.821
76.9	0.937183	0.971992	0.624362		156.9	-26.156	-87.8093	-638.953
77	0.944276	0.971459	0.63196		157	-27.7129	-85.9411	-634.594
77.1	0.953394	0.972259	0.636115		157.1	-24.9104	-78.7793	-636.151
77.2	0.949341	0.974393	0.637777		157.2	-27.0901	-75.3541	-648.294
77.3	0.937183	0.97466	0.638965		157.3	-28.3356	-71.3062	-648.917
77.4	0.943262	0.97706	0.639083		157.4	-32.3836	-74.1086	-645.492
77.5	0.942249	0.977327	0.638371		157.5	-30.2039	-77.2224	-642.69
77.6	0.941236	0.97626	0.638727		157.6	-21.4853	-78.4679	-642.067
77.7	0.941236	0.974126	0.641458		157.7	-22.7308	-83.1386	-640.199
77.8	0.942249	0.973593	0.643239		157.8	-23.3535	-81.2703	-646.738
77.9	0.937183	0.976794	0.642408		157.9	-21.4853	-77.5338	-646.426
78	0.932118	0.975193	0.644545		158	-25.5332	-79.4021	-643.935
78.1	0.940223	0.974393	0.642289		158.1	-25.2218	-80.959	-641.755
78.2	0.948328	0.974927	0.641102		158.2	-22.108	-82.2045	-643.935
78.3	0.95542	0.972793	0.639202		158.3	-22.108	-81.2703	-650.163
78.4	0.942249	0.975994	0.639202		158.4	-26.4674	-79.4021	-644.558
78.5	0.947315	0.974393	0.645138		158.5	-27.0901	-80.3362	-638.953
78.6	0.964539	0.975994	0.652618		158.6	-20.8625	-82.2045	-635.528
78.7	0.942249	0.97466	0.65333		158.7	-23.0422	-85.3183	-640.51
78.8	0.946302	0.974393	0.652737		158.8	-25.5332	-85.3183	-642.378
78.9	0.943262	0.972259	0.654161		158.9	-22.108	-86.8752	-636.462
79	0.945289	0.971992	0.652737		159	-25.8446	-85.3183	-634.905
79.1	0.950355	0.975727	0.654161		159.1	-26.156	-79.0907	-637.396
79.2	0.940223	0.972526	0.652499		159.2	-27.7129	-79.7134	-641.133
79.3	0.922999	0.971992	0.652974		159.3	-26.4674	-83.7614	-639.887
79.4	0.937183	0.97386	0.653211		159.4	-21.4853	-83.7614	-645.181
79.5	0.934144	0.973059	0.655586		159.5	-21.4853	-81.5817	-646.426
79.6	0.944276	0.975727	0.657723		159.6	-23.3535	-81.5817	-638.642
79.7	0.937183	0.976527	0.656179		159.7	-20.2397	-84.0728	-628.366
79.8	0.928065	0.976527	0.659741		159.8	-25.2218	-85.3183	-630.546
79.9	0.941236	0.972793	0.660335		159.9	-25.2218	-86.2524	-634.905
80	0.941236	0.97626	0.660335		160	-23.0422	-82.8272	-638.33
80.1	0.944276	0.979194	0.658554		160.1	-23.3535	-77.8452	-632.414
80.2	0.959473	0.97706	0.658554		160.2	-27.4015	-76.911	-636.773
80.3	0.948328	0.978394	0.660691		160.3	-24.5991	-76.5996	-642.067
80.4	0.95542	0.97546	0.65986		160.4	-31.1381	-78.1565	-633.348
80.5	0.938197	0.972259	0.665677		160.5	-27.7129	-77.5338	-634.905
80.6	0.952381	0.972526	0.662353		160.6	-25.5332	-79.0907	-631.791
80.7	0.95542	0.976794	0.658079		160.7	-23.9763	-84.3841	-627.121
80.8	0.954407	0.978661	0.657248		160.8	-23.3535	-86.8752	-638.953
80.9	0.941236	0.976794	0.658435		160.9	-23.6649	-88.1207	-639.264
81	0.954407	0.973059	0.658673		161	-31.4494	-83.1386	-640.51
81.1	0.953394	0.975727	0.660335		161.1	-31.1381	-78.1565	-634.282
81.2	0.948328	0.97706	0.661997		161.2	-27.7129	-82.8272	-635.528
81.3	0.950355	0.97466	0.662116		161.3	-31.1381	-78.7793	-638.33
81.4	0.941236	0.975193	0.654636		161.4	-24.2877	-77.5338	-635.839
81.5	0.942249	0.978127	0.655705		161.5	-27.4015	-79.0907	-638.642
81.6	0.931104	0.972259	0.657011		161.6	-27.0901	-80.959	-635.839
81.7	0.954407	0.972526	0.658673		161.7	-25.5332	-81.5817	-628.366
81.8	0.947315	0.971192	0.663422		161.8	-24.2877	-81.5817	-635.216
81.9	0.95846	0.969058	0.66639		161.9	-28.647	-83.1386	-635.528
82	0.9615	0.968525	0.668883		162	-33.6291	-81.8931	-630.857
82.1	0.952381	0.967725	0.669002		162.1	-28.3356	-84.0728	-633.348
82.2	0.950355	0.968525	0.664371		162.2	-23.3535	-82.2045	-639.576
82.3	0.945289	0.968258	0.66354		162.3	-24.2877	-85.0069	-633.037
82.4	0.948328	0.971992	0.662709		162.4	-23.3535	-86.2524	-636.151
82.5	0.953394	0.969859	0.661403		162.5	-22.7308	-84.6955	-637.396
82.6	0.951368	0.968792	0.662947		162.6	-22.4194	-83.7614	-632.725
82.7	0.956434	0.966658	0.667577		162.7	-26.4674	-88.1207	-621.516
82.8	0.952381	0.967991	0.66354		162.8	-25.2218	-89.6776	-612.486
82.9	0.963526	0.973326	0.665559		162.9	-25.5332	-88.7435	-617.779
83	0.952381	0.976794	0.668408		163	-22.7308	-88.1207	-624.941
83.1	0.942249	0.97466	0.668883		163.1	-23.0422	-87.1866	-628.055
83.2	0.946302	0.975193	0.667339		163.2	-23.9763	-85.0069	-625.875
83.3	0.946302	0.97466	0.663778		163.3	-23.9763	-83.7614	-622.45
83.4	0.93617	0.97386	0.663778		163.4	-23.0422	-86.8752	-623.384
83.5	0.952381	0.97386	0.665202		163.5	-25.5332	-82.2045	-622.761
83.6	0.942249	0.978394	0.662947		163.6	-28.0243	-83.7614	-617.156
83.7	0.941236	0.973326	0.664965		163.7	-23.6649	-87.1866	-622.138
83.8	0.941236	0.97466	0.665559		163.8	-23.6649	-81.2703	-617.779
83.9	0.951368	0.970659	0.662828		163.9	-18.3715	-86.8752	-619.959
84	0.933131	0.970392	0.666983		164	-20.5511	-83.45	-617.156
84.1	0.954407	0.978127	0.666508		164.1	-26.156	-87.498	-611.552
84.2	0.941236	0.978661	0.66449		164.2	-23.9763	-84.6955	-616.845
84.3	0.931104	0.977594	0.665915		164.3	-24.9104	-84.6955	-622.45
84.4	0.938197	0.975994	0.664965		164.4	-22.7308	-86.5638	-619.025
84.5	0.941236	0.977861	0.661997		164.5	-29.2698	-84.0728	-615.599
84.6	0.942249	0.975994	0.658435		164.6	-29.2698	-80.0248	-612.174
84.7	0.943262	0.980261	0.663778		164.7	-27.7129	-70.9948	-619.025
84.8	0.940223	0.978928	0.665559		164.8	-25.5332	-75.9769	-608.438
84.9	0.938197	0.978928	0.66912		164.9	-23.9763	-76.5996	-607.192
85	0.932118	0.979728	0.66817		165	-29.5812	-77.8452	-611.863
85.1	0.952381	0.977594	0.664609		165.1	-26.4674	-69.1265	-608.438
85.2	0.953394	0.975193	0.664371		165.2	-23.9763	-71.3062	-607.504
85.3	0.953394	0.972526	0.669239		165.3	-26.156	-82.8272	-613.42
85.4	0.946302	0.974126	0.671732		165.4	-28.9584	-81.2703	-609.995
85.5	0.948328	0.975727	0.67197		165.5	-23.3535	-78.1565	-608.126
85.6	0.954407	0.973059	0.666271		165.6	-26.156	-81.2703	-611.552
85.7	0.951368	0.971726	0.660691		165.7	-27.4015	-85.0069	-613.42
85.8	0.954407	0.970926	0.668527		165.8	-28.0243	-88.1207	-614.354
85.9	0.93921	0.97546	0.671376		165.9	-29.2698	-84.6955	-610.617
86	0.951368	0.978661	0.666746		166	-23.9763	-81.5817	-601.587
86.1	0.952381	0.978661	0.66912		166.1	-23.3535	-84.3841	-600.342
86.2	0.946302	0.977861	0.672444		166.2	-23.6649	-86.2524	-598.474
86.3	0.957447	0.975727	0.674225		166.3	-21.4853	-85.9411	-595.983
86.4	0.959473	0.97626	0.674581		166.4	-23.0422	-91.2345	-604.701
86.5	0.959473	0.977861	0.673038		166.5	-26.156	-87.1866	-607.815
86.6	0.952381	0.978394	0.671732		166.6	-21.7966	-87.1866	-602.521
86.7	0.945289	0.978394	0.671851		166.7	-24.5991	-80.959	-599.719
86.8	0.960486	0.978661	0.669951		166.8	-23.9763	-81.2703	-598.474
86.9	0.9615	0.97706	0.671851		166.9	-26.4674	-81.5817	-604.078
87	0.954407	0.978394	0.670782		167	-25.2218	-77.2224	-600.342
87.1	0.950355	0.97546	0.677193		167.1	-17.7487	-84.6955	-599.719
87.2	0.95846	0.977327	0.6766		167.2	-22.108	-78.4679	-596.917
87.3	0.95846	0.97706	0.673513		167.3	-23.0422	-79.4021	-596.917
87.4	0.960486	0.979461	0.672207		167.4	-19.3056	-81.8931	-602.521
87.5	0.951368	0.978394	0.674581		167.5	-22.108	-76.911	-605.324
87.6	0.95542	0.977327	0.681705		167.6	-24.2877	-74.7314	-596.294
87.7	0.959473	0.977327	0.680874		167.7	-23.3535	-73.7972	-590.378
87.8	0.952381	0.979728	0.679568		167.8	-24.9104	-74.42	-588.509
87.9	0.95542	0.978394	0.682655		167.9	-19.9284	-72.5517	-586.952
88	0.945289	0.977327	0.681824		168	-22.108	-75.0427	-595.671
88.1	0.95542	0.979194	0.680399		168.1	-24.5991	-79.4021	-594.737
88.2	0.953394	0.97626	0.678381		168.2	-23.6649	-78.1565	-589.444
88.3	0.947315	0.978394	0.678737		168.3	-21.4853	-79.4021	-596.917
88.4	0.95542	0.977594	0.673869		168.4	-22.108	-77.8452	-592.869
88.5	0.941236	0.979461	0.674463		168.5	-23.6649	-78.4679	-590.689
88.6	0.945289	0.978928	0.679449		168.6	-28.0243	-81.8931	-589.132
88.7	0.941236	0.978394	0.685385		168.7	-22.4194	-81.2703	-586.641
88.8	0.946302	0.976794	0.685266		168.8	-23.0422	-78.7793	-594.426
88.9	0.959473	0.979461	0.68123		168.9	-23.9763	-82.2045	-592.869
89	0.962513	0.978928	0.679687		169	-21.7966	-80.6476	-591.935
89.1	0.95542	0.97706	0.677906		169.1	-26.4674	-80.0248	-581.348
89.2	0.956434	0.978127	0.680043		169.2	-24.5991	-82.2045	-584.461
89.3	0.952381	0.976794	0.679924		169.3	-24.9104	-78.4679	-593.18
89.4	0.959473	0.979461	0.681349		169.4	-24.2877	-80.3362	-581.036
89.5	0.956434	0.97466	0.683842		169.5	-21.7966	-77.5338	-575.431
89.6	0.960486	0.97626	0.683486		169.6	-23.6649	-76.911	-574.497
89.7	0.959473	0.978928	0.682773		169.7	-29.8925	-79.4021	-574.186
89.8	0.959473	0.978928	0.688116		169.8	-26.7787	-80.3362	-574.809
89.9	0.947315	0.978928	0.683723		169.9	-26.156	-78.7793	-577.922
90	0.942249	0.976527	0.682536		170	-24.9104	-80.6476	-575.12
90.1	0.95542	0.978394	0.686216		170.1	-23.6649	-81.5817	-571.072
90.2	0.943262	0.978928	0.683723		170.2	-29.8925	-74.42	-567.024
90.3	0.941236	0.978127	0.682892		170.3	-21.4853	-75.9769	-565.779
90.4	0.951368	0.974393	0.687047		170.4	-25.2218	-79.7134	-574.497
90.5	0.947315	0.973593	0.687641		170.5	-28.647	-85.9411	-576.677
90.6	0.960486	0.97626	0.688947		170.6	-23.0422	-88.1207	-575.12
90.7	0.956434	0.97386	0.684792		170.7	-23.6649	-81.8931	-573.563
90.8	0.95542	0.972526	0.687404		170.8	-26.4674	-78.1565	-568.581
90.9	0.966565	0.97706	0.688116		170.9	-25.8446	-73.7972	-571.695
91	0.943262	0.975727	0.689303		171	-19.617	-83.45	-578.545
91.1	0.947315	0.973593	0.685148		171.1	-19.9284	-80.0248	-582.593
91.2	0.946302	0.974126	0.685741		171.2	-24.5991	-82.2045	-578.545
91.3	0.957447	0.976527	0.687997		171.3	-26.156	-79.7134	-574.809
91.4	0.959473	0.978394	0.687878		171.4	-23.0422	-78.1565	-574.809
91.5	0.948328	0.982662	0.688591		171.5	-23.9763	-80.0248	-571.072
91.6	0.947315	0.981595	0.690372		171.6	-24.9104	-83.7614	-570.138
91.7	0.946302	0.980795	0.695239		171.7	-24.2877	-83.1386	-575.12
91.8	0.938197	0.979995	0.69797		171.8	-24.2877	-83.1386	-565.156
91.9	0.942249	0.982662	0.694289		171.9	-24.2877	-83.45	-568.581
92	0.938197	0.982395	0.693458		172	-22.7308	-78.7793	-568.581
92.1	0.943262	0.979728	0.697732		172.1	-25.2218	-79.4021	-567.024
92.2	0.940223	0.979728	0.700226		172.2	-25.2218	-77.2224	-573.252
92.3	0.933131	0.980261	0.69892		172.3	-23.3535	-81.5817	-574.809
92.4	0.924012	0.978394	0.701175		172.4	-20.5511	-84.3841	-574.497
92.5	0.934144	0.975994	0.701057		172.5	-21.7966	-81.5817	-569.827
92.6	0.941236	0.97466	0.697851		172.6	-25.2218	-80.3362	-568.27
92.7	0.926039	0.971726	0.694171		172.7	-20.2397	-81.5817	-570.449
92.8	0.930091	0.97546	0.695239		172.8	-24.5991	-81.2703	-565.156
92.9	0.934144	0.973059	0.700819		172.9	-24.5991	-77.5338	-560.485
93	0.941236	0.97386	0.70355		173	-27.4015	-79.0907	-561.731
93.1	0.941236	0.971726	0.703906		173.1	-28.3356	-79.4021	-567.336
93.2	0.930091	0.973059	0.701413		173.2	-22.4194	-76.911	-562.353
93.3	0.928065	0.970125	0.705093		173.3	-23.3535	-73.4858	-569.827
93.4	0.940223	0.972259	0.704381		173.4	-25.2218	-69.4379	-563.599
93.5	0.941236	0.974927	0.704974		173.5	-22.4194	-71.9289	-562.976
93.6	0.943262	0.972526	0.704974		173.6	-26.156	-69.7493	-564.222
93.7	0.929078	0.975994	0.700107		173.7	-26.4674	-75.3541	-564.533
93.8	0.937183	0.97706	0.702481		173.8	-26.156	-75.9769	-562.665
93.9	0.925025	0.977594	0.707943		173.9	-25.2218	-71.3062	-562.665
94	0.93921	0.976527	0.704143		174	-19.617	-76.911	-561.419
94.1	0.941236	0.971192	0.705331		174.1	-26.4674	-74.42	-560.485
94.2	0.931104	0.971192	0.706637		174.2	-27.4015	-74.7314	-558.305
94.3	0.934144	0.971726	0.705093		174.3	-25.2218	-81.2703	-561.108
94.4	0.951368	0.974126	0.706637		174.4	-25.5332	-82.8272	-561.108
94.5	0.935157	0.974393	0.706993		174.5	-23.0422	-75.3541	-558.305
94.6	0.937183	0.975994	0.709367		174.6	-24.9104	-79.0907	-565.779
94.7	0.924012	0.97466	0.711385		174.7	-26.156	-81.5817	-557.683
94.8	0.938197	0.974927	0.711742		174.8	-28.0243	-82.2045	-555.814
94.9	0.943262	0.979461	0.710317		174.9	-22.7308	-83.45	-560.174
95	0.932118	0.976794	0.710436		175	-24.5991	-81.5817	-565.156
95.1	0.93617	0.975193	0.710792		175.1	-28.9584	-78.4679	-563.599
95.2	0.943262	0.979194	0.713048		175.2	-21.4853	-83.45	-567.958
95.3	0.945289	0.97626	0.712454		175.3	-29.5812	-84.3841	-559.862
95.4	0.942249	0.978928	0.714828		175.4	-30.5153	-84.3841	-561.419
95.5	0.934144	0.980795	0.716134		175.5	-27.0901	-78.7793	-561.108
95.6	0.943262	0.981595	0.715422		175.6	-23.6649	-82.5159	-559.551
95.7	0.93617	0.983195	0.708774		175.7	-23.3535	-79.4021	-556.749
95.8	0.938197	0.983462	0.704856		175.8	-29.2698	-77.5338	-563.288
95.9	0.947315	0.981328	0.709011		175.9	-24.9104	-77.8452	-554.569
96	0.929078	0.980528	0.707468		176	-23.9763	-80.3362	-548.03
96.1	0.934144	0.978394	0.71186		176.1	-24.5991	-83.7614	-555.814
96.2	0.942249	0.97386	0.709605		176.2	-26.156	-84.6955	-554.88
96.3	0.934144	0.979728	0.697495		176.3	-28.647	-87.8093	-555.503
96.4	0.941236	0.981328	0.715659		176.4	-28.9584	-84.3841	-555.814
96.5	0.942249	0.978928	0.708892		176.5	-27.4015	-83.7614	-553.635
96.6	0.93617	0.978127	0.704381		176.6	-25.5332	-83.45	-550.21
96.7	0.940223	0.97386	0.70355		176.7	-25.8446	-75.3541	-550.832
96.8	0.931104	0.972259	0.702363		176.8	-28.9584	-76.2883	-550.21
96.9	0.93921	0.97626	0.705924		176.9	-26.7787	-86.5638	-548.653
97	0.931104	0.97386	0.710079		177	-24.9104	-80.0248	-546.162
97.1	0.922999	0.973059	0.716253		177.1	-23.0422	-82.2045	-545.539
97.2	0.926039	0.970125	0.715303		177.2	-22.7308	-77.8452	-546.473
97.3	0.931104	0.973059	0.714116		177.3	-27.7129	-82.2045	-545.539
97.4	0.920973	0.970926	0.715541		177.4	-25.2218	-82.2045	-542.736
97.5	0.920973	0.968792	0.709961		177.5	-23.3535	-78.4679	-544.916
97.6	0.912867	0.974927	0.707349		177.6	-28.647	-76.2883	-542.425
97.7	0.920973	0.974393	0.70913		177.7	-24.5991	-75.9769	-546.162
97.8	0.937183	0.972793	0.707349		177.8	-24.5991	-79.7134	-545.85
97.9	0.920973	0.975727	0.704737		177.9	-29.5812	-78.7793	-540.868
98	0.919959	0.974126	0.708774		178	-27.0901	-77.2224	-545.539
98.1	0.921986	0.973059	0.709248		178.1	-22.108	-82.8272	-548.964
98.2	0.925025	0.975193	0.711742		178.2	-27.4015	-78.7793	-545.227
98.3	0.932118	0.974126	0.708299		178.3	-23.9763	-77.2224	-553.323
98.4	0.944276	0.974126	0.706755		178.4	-30.8267	-79.4021	-546.784
98.5	0.929078	0.973059	0.706518		178.5	-28.9584	-76.2883	-546.473
98.6	0.917933	0.975727	0.709486		178.6	-24.5991	-73.4858	-548.03
98.7	0.877406	0.974393	0.707586		178.7	-28.9584	-74.1086	-550.21
98.8	0.978723	0.977327	0.706993		178.8	-27.7129	-75.9769	-553.635
98.9	0.930091	0.976527	0.705093		178.9	-27.4015	-75.3541	-556.437
99	0.919959	0.978928	0.703668		179	-26.156	-73.7972	-557.371
99.1	0.920973	0.983195	0.704856		179.1	-27.0901	-73.1744	-557.683
99.2	0.924012	0.981862	0.713285		179.2	-28.3356	-72.5517	-551.144
99.3	0.909828	0.985063	0.71839		179.3	-31.7608	-75.9769	-548.03
99.4	0.932118	0.978928	0.716016		179.4	-27.7129	-79.0907	-551.766
99.5	0.928065	0.977327	0.713641		179.5	-27.0901	-77.5338	-555.192
99.6	0.920973	0.980795	0.71281		179.6	-31.1381	-77.8452	-556.437
99.7	0.914894	0.980795	0.712335		179.7	-29.8925	-78.7793	-552.701
99.8	0.928065	0.981328	0.713997		179.8	-24.2877	-77.5338	-549.275
99.9	0.935157	0.978928	0.713641		179.9	-30.5153	-76.5996	-548.03
100	0.918946	0.980795	0.71744		180	-29.8925	-74.7314	-548.03
100.1	0.930091	0.980528	0.711029		180.1	-29.2698	-76.911	-550.21
100.2	0.915907	0.981062	0.709723		180.2	-31.4494	-75.3541	-555.192
100.3	0.910841	0.979728	0.708774		180.3	-26.156	-74.1086	-551.144
100.4	0.910841	0.976794	0.709842		180.4	-27.7129	-77.2224	-555.192
100.5	0.91388	0.976527	0.712929		180.5	-27.0901	-80.0248	-556.437
100.6	0.927052	0.978394	0.713048		180.6	-28.9584	-78.4679	-555.503
100.7	0.920973	0.981328	0.711029		180.7	-30.8267	-81.8931	-548.03
100.8	0.933131	0.981062	0.713997		180.8	-27.4015	-78.7793	-541.802
100.9	0.927052	0.980261	0.718034		180.9	-27.7129	-80.3362	-545.227
101	0.935157	0.979995	0.717559		181	-23.6649	-79.4021	-551.144
101.1	0.931104	0.981062	0.715778		181.1	-29.2698	-77.8452	-546.784
101.2	0.921986	0.978661	0.711385		181.2	-29.2698	-75.9769	-546.784
101.3	0.928065	0.97706	0.708536		181.3	-27.7129	-79.0907	-547.719
101.4	0.930091	0.978394	0.704618		181.4	-28.3356	-78.4679	-542.425
101.5	0.924012	0.981062	0.710079		181.5	-26.4674	-73.1744	-538.066
101.6	0.925025	0.983462	0.712573		181.6	-28.3356	-77.8452	-539.623
101.7	0.929078	0.982395	0.708417		181.7	-27.7129	-75.3541	-539.623
101.8	0.920973	0.979728	0.709011		181.8	-29.8925	-73.4858	-540.557
101.9	0.926039	0.981328	0.713285		181.9	-30.2039	-70.6834	-538.688
102	0.928065	0.982929	0.716253		182	-29.8925	-72.5517	-541.802
102.1	0.931104	0.979995	0.710079		182.1	-23.9763	-76.2883	-537.754
102.2	0.932118	0.978127	0.703312		182.2	-24.2877	-77.5338	-534.641
102.3	0.943262	0.979728	0.704974		182.3	-25.5332	-80.6476	-548.341
102.4	0.934144	0.979728	0.708536		182.4	-25.8446	-77.8452	-544.293
102.5	0.932118	0.981062	0.711979		182.5	-27.7129	-74.1086	-544.293
102.6	0.944276	0.982929	0.711267		182.6	-24.2877	-74.1086	-546.784
102.7	0.942249	0.981328	0.711742		182.7	-22.108	-77.2224	-540.245
102.8	0.938197	0.980528	0.71376		182.8	-27.7129	-77.2224	-537.754
102.9	0.941236	0.982395	0.713048		182.9	-26.4674	-76.2883	-536.82
103	0.928065	0.982662	0.711267		183	-23.6649	-79.4021	-534.329
103.1	0.944276	0.980795	0.712929		183.1	-23.3535	-86.2524	-538.688
103.2	0.935157	0.976794	0.718034		183.2	-26.156	-81.2703	-531.215
103.3	0.942249	0.981328	0.718865		183.3	-23.0422	-83.45	-536.197
103.4	0.938197	0.982662	0.722664		183.4	-22.108	-84.0728	-534.641
103.5	0.942249	0.981062	0.721714		183.5	-24.5991	-84.6955	-535.886
103.6	0.93921	0.980261	0.716965		183.6	-23.0422	-89.989	-530.593
103.7	0.941236	0.975727	0.721952		183.7	-22.108	-89.6776	-529.97
103.8	0.940223	0.975193	0.724089		183.8	-23.6649	-89.989	-533.706
103.9	0.938197	0.975193	0.727532		183.9	-24.2877	-91.5459	-530.904
104	0.938197	0.975193	0.727769		184	-25.8446	-86.2524	-525.922
104.1	0.95542	0.972526	0.721952		184.1	-23.6649	-87.498	-529.347
104.2	0.944276	0.975727	0.716728		184.2	-23.3535	-93.1028	-529.658
104.3	0.943262	0.979194	0.717559		184.3	-24.5991	-93.7256	-520.006
104.4	0.938197	0.978928	0.721121		184.4	-25.5332	-96.2166	-524.988
104.5	0.952381	0.976527	0.725157		184.5	-24.5991	-92.1687	-524.676
104.6	0.947315	0.97626	0.726582		184.6	-21.1739	-89.989	-524.365
104.7	0.944276	0.975727	0.721239		184.7	-21.1739	-94.9711	-530.593
104.8	0.944276	0.975193	0.719102		184.8	-24.5991	-91.8573	-526.233
104.9	0.953394	0.976794	0.71934		184.9	-26.156	-89.989	-529.036
105	0.951368	0.97546	0.720883		185	-26.4674	-90.3004	-524.365
105.1	0.951368	0.975994	0.720171		185.1	-22.7308	-91.8573	-523.742
105.2	0.948328	0.97466	0.723139		185.2	-20.2397	-87.498	-521.563
105.3	0.963526	0.975193	0.723495		185.3	-22.7308	-91.2345	-524.676
105.4	0.941236	0.979194	0.720883		185.4	-20.2397	-84.6955	-523.431
105.5	0.948328	0.977861	0.717559		185.5	-20.2397	-85.3183	-529.347
105.6	0.953394	0.976527	0.720646		185.6	-23.3535	-87.1866	-522.497
105.7	0.941236	0.975727	0.721714		185.7	-23.3535	-87.8093	-525.299
105.8	0.953394	0.977861	0.725276		185.8	-34.5632	-84.3841	-559.551
105.9	0.947315	0.975727	0.72397		185.9	-62.2761	-84.3841	-606.881
106	0.95846	0.974126	0.722427		186	3.73657	-86.5638	-429.705
106.1	0.950355	0.975193	0.719815		186.1	-5.91623	-78.7793	-492.604
106.2	0.960486	0.975193	0.721358		186.2	-15.569	-80.959	-528.413
106.3	0.966565	0.974393	0.721121		186.3	-20.2397	-84.6955	-530.593
106.4	0.949341	0.975193	0.723614		186.4	-18.9942	-87.1866	-529.036
106.5	0.949341	0.974927	0.720646		186.5	-26.7787	-82.2045	-529.658
106.6	0.952381	0.97466	0.721239		186.6	-23.9763	-83.45	-527.79
106.7	0.952381	0.974927	0.720052		186.7	-18.3715	-86.8752	-527.479
106.8	0.949341	0.974393	0.726819		186.8	-18.9942	-80.0248	-524.676
106.9	0.945289	0.978928	0.728007		186.9	-18.6828	-84.6955	-526.545
107	0.9615	0.975193	0.728482		187	-20.5511	-86.8752	-529.036
107.1	0.951368	0.974393	0.725039		187.1	-26.4674	-84.6955	-531.838
107.2	0.941236	0.975994	0.725751		187.2	-25.8446	-78.7793	-528.724
107.3	0.952381	0.974126	0.726938		187.3	-23.6649	-80.0248	-524.676
107.4	0.948328	0.976527	0.721952		187.4	-14.6349	-76.911	-524.676
107.5	0.957447	0.975727	0.719459		187.5	-19.9284	-77.8452	-520.317
107.6	0.952381	0.975994	0.717559		187.6	-25.2218	-75.3541	-520.006
107.7	0.952381	0.97626	0.717084		187.7	-21.1739	-77.8452	-522.808
107.8	0.956434	0.97546	0.721596		187.8	-21.7966	-77.5338	-525.922
107.9	0.95542	0.979461	0.7305		187.9	-18.9942	-80.3362	-522.185
108	0.950355	0.982929	0.735724		188	-24.5991	-99.019	-517.515
108.1	0.960486	0.979728	0.730144		188.1	-22.108	-64.4558	-514.401
108.2	0.954407	0.982395	0.726819		188.2	-24.2877	-68.8151	-522.185
108.3	0.95542	0.982395	0.723614		188.3	-18.9942	-71.9289	-524.988
108.4	0.946302	0.97626	0.725751		188.4	-17.1259	-71.9289	-524.988
108.5	0.951368	0.978661	0.727888		188.5	-22.4194	-74.42	-516.58
108.6	0.947315	0.980528	0.72955		188.6	-23.3535	-77.5338	-506.928
108.7	0.952381	0.978928	0.729431		188.7	-19.617	-74.42	-514.712
108.8	0.95846	0.979194	0.724682		188.8	-22.108	-74.1086	-519.694
108.9	0.951368	0.978661	0.72302		188.9	-17.7487	-73.1744	-515.646
109	0.957447	0.975727	0.726582		189	-16.8146	-72.5517	-515.646
109.1	0.95846	0.976794	0.727057		189.1	-22.4194	-70.0606	-506.928
109.2	0.9615	0.979995	0.725988		189.2	-18.9942	-76.911	-508.485
109.3	0.943262	0.981862	0.726107		189.3	-22.108	-83.1386	-506.928
109.4	0.962513	0.977861	0.72302		189.4	-20.2397	-81.8931	-506.616
109.5	0.964539	0.977594	0.72492		189.5	-21.7966	-79.7134	-506.616
109.6	0.950355	0.977861	0.724682		189.6	-18.0601	-85.9411	-500.7
109.7	0.95542	0.977861	0.723139		189.7	-21.4853	-80.6476	-501.634
109.8	0.963526	0.979461	0.721952		189.8	-23.0422	-88.7435	-507.862
109.9	0.950355	0.980528	0.717678		189.9	-22.108	-93.4142	-515.646
110	0.943262	0.980795	0.714235		190	-22.108	-89.3662	-513.155
					190.1	-21.7966	-84.6955	-510.664
					190.2	-22.7308	-79.7134	-511.287
					190.3	-22.7308	-80.3362	-520.628
					190.4	-22.7308	-81.5817	-519.694
					190.5	-24.2877	-77.5338	-513.467
					190.6	-22.4194	-75.3541	-509.419
					190.7	-23.9763	-70.9948	-501.946
					190.8	-23.0422	-72.2403	-508.485
					190.9	-23.9763	-74.7314	-505.371
					191	-23.3535	-77.8452	-503.191
					191.1	-22.108	-89.0549	-500.389
					191.2	-21.7966	-84.0728	-500.389
					191.3	-24.2877	-80.959	-503.814
					191.4	-24.5991	-80.0248	-492.916
					191.5	-25.2218	-79.4021	-500.077
					191.6	-20.5511	-79.4021	-497.275
					191.7	-19.617	-83.7614	-502.568
					191.8	-19.9284	-84.0728	-506.305
					191.9	-18.9942	-80.3362	-505.682
					192	-23.0422	-81.2703	-511.287
					192.1	-26.7787	-79.4021	-509.73
					192.2	-23.0422	-82.8272	-510.664
					192.3	-20.8625	-78.4679	-506.616
					192.4	-19.617	-76.5996	-505.994
					192.5	-19.617	-76.2883	-499.455
					192.6	-23.0422	-76.5996	-500.389
					192.7	-24.5991	-76.5996	-509.73
					192.8	-21.7966	-77.2224	-505.994
					192.9	-24.2877	-77.2224	-503.814
					193	-23.0422	-81.8931	-513.155
					193.1	-25.2218	-81.2703	-507.862
					193.2	-21.7966	-79.0907	-498.832
					193.3	-27.4015	-79.7134	-491.67
					193.4	-23.0422	-80.6476	-489.802
					193.5	-22.4194	-82.2045	-490.424
					193.6	-21.4853	-80.0248	-492.916
					193.7	-24.9104	-81.2703	-505.994
					193.8	-23.3535	-83.7614	-502.568
					193.9	-29.5812	-82.5159	-497.275
					194	-24.2877	-81.5817	-496.341
					194.1	-21.4853	-78.4679	-496.963
					194.2	-22.108	-78.1565	-501.323
					194.3	-22.7308	-79.7134	-497.898
					194.4	-22.108	-80.959	-499.455
					194.5	-23.9763	-78.4679	-497.898
					194.6	-25.5332	-77.8452	-494.784
					194.7	-23.6649	-79.0907	-488.245
					194.8	-23.6649	-82.8272	-491.981
					194.9	-27.0901	-83.45	-491.047
					195	-22.4194	-79.7134	-492.604
					195.1	-22.4194	-78.7793	-497.586
					195.2	-28.647	-80.959	-501.011
					195.3	-24.9104	-76.2883	-491.67
					195.4	-23.3535	-76.5996	-498.52
					195.5	-23.0422	-82.8272	-498.209
					195.6	-29.8925	-76.5996	-499.143
					195.7	-25.5332	-80.3362	-503.502
					195.8	-16.8146	-82.2045	-491.047
					195.9	-24.9104	-86.8752	-494.472
					196	-21.7966	-84.6955	-500.389
					196.1	-24.2877	-80.3362	-493.538
					196.2	-27.7129	-79.7134	-490.113
					196.3	-28.647	-84.3841	-485.754
					196.4	-22.7308	-80.0248	-484.197
					196.5	-23.3535	-79.4021	-484.82
					196.6	-28.0243	-82.5159	-492.916
					196.7	-23.6649	-85.6297	-491.981
					196.8	-27.0901	-80.0248	-499.455
					196.9	-28.0243	-80.959	-498.209
					197	-23.0422	-80.3362	-491.359
					197.1	-26.4674	-80.959	-488.868
					197.2	-29.8925	-82.8272	-480.149
					197.3	-22.7308	-82.2045	-479.215
					197.4	-22.7308	-85.9411	-485.754
					197.5	-26.156	-80.6476	-486.065
					197.6	-22.4194	-77.8452	-484.508
					197.7	-21.1739	-78.7793	-481.706
					197.8	-24.9104	-81.8931	-479.838
					197.9	-27.0901	-80.6476	-491.67
					198	-24.2877	-76.2883	-488.556
					198.1	-23.0422	-80.3362	-473.921
					198.2	-27.4015	-80.3362	-476.724
					198.3	-25.5332	-81.2703	-476.412
					198.4	-18.6828	-78.1565	-472.364
					198.5	-23.9763	-79.4021	-472.364
					198.6	-26.4674	-69.1265	-474.233
					198.7	-27.4015	-72.5517	-477.658
					198.8	-25.8446	-75.9769	-481.394
					198.9	-28.9584	-74.42	-478.281
					199	-26.156	-69.7493	-476.724
					199.1	-27.4015	-69.7493	-478.592
					199.2	-30.8267	-71.9289	-472.364
					199.3	-27.4015	-73.4858	-468.939
					199.4	-30.8267	-77.5338	-470.496
					199.5	-28.9584	-72.8631	-471.742
					199.6	-28.3356	-74.1086	-471.43
					199.7	-27.7129	-72.2403	-468.316
					199.8	-30.8267	-74.1086	-470.185
					199.9	-28.9584	-71.6175	-464.891
					200	-28.9584	-71.6175	-465.514
[truncated: 6 more columns]
