# Supplementary material for: Functional implications of the exon 9 splice insert in GluK1 kainate receptors
Source: eLife. 2024 Nov 6;12:RP89755. doi: 10.7554/eLife.89755 (PMC11540303; doi:10.7554/eLife.89755)
Supplement: Figure 4—source data 1. [file elife-89755-fig4-data1.xlsx]

## Sheet: Figure 4
Figure 4B
GluK1-1a								K368-E								K375_379_382H376-E
10 mM Glu Desensitization (ms)	A1	Tau1	A2	Tau2	Mean-weighted ƮDes @ ≤100 ms			10 mM Glu Desensitization (ms)	A1	Tau1	A2	Tau2	Mean-weighted ƮDes @ ≤100 ms			10 mM Glu Desensitization (ms)	A1	Tau1	A2	Tau2	Mean-weighted ƮDes @ ≤100 ms
Cell 1	-22.4464	-14.9984	-344.108	6.41232	5.10121			Cell 1 E-1	3.81706	-14.7593	-16.8942	2.23812	7.19944			Cell 1_E1	-281.433	7.50715	-23.4147	1.07562	7.01316
Cell 2	-27.0132	12.0694	-127.339	3.87096	5.30577			Cell 1 E-4	-141.898	14.3391	-82.1143	2.83309	10.1214			Cell 1-E2	-34.8885	30.5279	-65.5511	7.59759	15.5626
Cell 3	-259.987	3.09683	68.4794	0.893014	3.88487			Cell 3 E-2	1.13426	-16.8826	-54.7772	5.8698	6.3509			Cell 1-E3	-272.856	5.3886	0.0393896	-4.54078	5.39003
Cell 5	-74.8116	16.8756	-149.084	1.83956	6.86364							Mean	7.89059			Cell 3-E1	-139.544	16.9445	-156.242	2.83964	9.49392
Cell 10	12.4674	8.99137	-86.1439	3.4759	2.54258							SEM	1.14201			Cell 4-E1	-49.9063	23.1678	-169.348	8.24184	11.6393
Cell 11	29.5567	5.30963	-77.4597	4.32902	3.72397							N	3			Cell 5-E2	0.826957	-27.0479	-303.229	8.49502	8.59222
Cell 12	-101.386	12.7399	-117.208	3.25451	7.65393															Mean	9.6152
Cell 13	-3.01433	82.1056	-324.786	5.40114	6.10648															SEM	1.47369
Cell 14	-77.7279	16.9706	-260.177	4.47846	7.35201															N	6
Cell 16	16.5623	-30.7107	-786.265	3.02726	3.75323
Cell 18	-33.3771	15.1036	-291.068	3.88752	5.04137
				Mean	5.21173
				SEM	0.498636
				N	11
Figure 4C
GluK1-1a														K368-E											K375_379_382H376-E
Recovery (s)	Cell 1			Cell 2			Cell 4			Cell 5					Cell 1 E1-4			Cell 2 E1-2								Cell 1 E1-2			Cell 5 E1-2			Cell 7
	Imax	I	%	Imax	I	%	Imax	I	%	Imax	I	%		Recovery (s)	Imax	I	%	Imax	I	%	Imax	I	%		Recovery (s)	Imax	I	%	Imax	I	%	Imax	I	%
0.5	414	55	13.285	226	30	13.2743	277	19	6.85921	216	18	8.33333		0.1											0.1	184.91	105.7	57.2	317.6	35.23	11.1	243.4	126.8	52.0953
1	431	75	17.4014	264	56	21.2121	212	38	17.9245	197	34	17.2589		0.2	175.31	27.2	15.5154				101.86	49.44	48.5372		0.2	172.2	97.7	56.7	337.1	48.6	14.4	244.7	141.1	57.6624
2	364	132	36.2637	243	81	33.3333	194	71	36.5979	154	67	43.5065		0.3	189.74	46.1	24.2964				98.91	55.09	55.6971		0.3	164.51	98.2	59.7	364.2	98.4	27
3	412	196	47.5728	239	122	51.046	157	69	43.949	151	87	57.6159		0.5											0.5	171.7	98	57.1	456.3	132.53	29
4	381	220	57.7428	215	159	73.9535	155	125	80.6452	145	97	66.8966		1	138.6	39.4	28.4271	158.81	51.5	32.4287	90.9	50.91	56.0066		1	236.6	152.4	64.4				167.19	102.73	61.4451
5	395	256	64.8101	193	146	75.6477	157	129	82.1656	120	96	80		2							106.6	81.89	76.8199		2	249.8	172.7	69.1	424.8	191.02	45	172.33	118.46	68.7402
6	372	253	68.0108	194	143	73.7113	160	129	80.625	127	108	85.0394		3	154.7	67	43.3096	170.22	57.62	33.8503					3	259.2	196.8	75.9	430.9	189.5	44
7	348	261	75	196	136	69.3878	137	111	81.0219	110	90	81.8182		4	156.7	94.9	60.5616				97.25	78.25	80.4627		4	243.1	190.6	78.4	649.63	312.8	48	143.36	119.36	83.2589
8	306	289	94.4444	195	164	84.1026	138	119	86.2319	91	83	91.2088		5	151.2	81.5	53.9021	132.2	84.57	63.9713	88.83	76.72	86.3672		5	126.7	83	65.5				125.27	102.66	81.951
9	325	300	92.3077	190	137	72.1053	126	124	98.4127	100	70	70		6	165.4	89.1	53.8694								6	234.8	204.4	87.1	614.11	447.2	72.8
10	327	282	86.2385	180	130	72.2222	149	140	93.9597	77	76	98.7013		7	139.8	94.2	67.382	122.21	103.8	84.9358	60.86	56.78	93.2961		7	116.3	110.4	94.9
Tau Recovery (s)			5.89			2.31			3.32			2.6		8	167.8	127.04	75.7092								8	128.5	104.4	81.2	612	461.8	75.5	198.97	188.66	94.8183
											Mean	3.53		9							58.24	56.62	97.2184		9	133.7	124	92.7	525.2	420.83	80.1	206.3	206.7	100.194
											SEM	0.814811		10				111.5	84.3	75.6054	69.08	68.25	98.7985		10	123.2	99.6	80.8	442.2	320.8	72.5	234.96	220.4	93.8032
											N	4		11	168.5	122.9	72.9377								Tau Recovery (s)			4.26			4.9			5.34
														15	163.3	146.4	89.6509	111.9	106	94.7274					Mean	4.83333
														20	145.33	127.4	87.6626	130.8	123.7	94.5719					SEM	0.313546
														25	153.3	143.26	93.4508								N	3
														Tau Recovery (s)			6.953			6.1			3.789
														Mean	5.614
														SEM	0.94514
														N	3
Figure 4D
GluK1-1a					K368-E					K375_379_382H376-E
Kai efficacy	10 mM Glu	1 mM Kai	IK/IG		Kai efficacy	10 mM Glu	1 mM Kai	IK/IG		Kai efficacy	10 mM Glu	1 mM Kai	IK/IG
Cell 10	109.68	134.23	1.22383		Cell 1 E1-2	185.36	188.6	1.01748		Cell 1 E1-2	166.1	100.8	0.606863
Cell 11	77.29	154.96	2.00492		Cell 1 E1-4	238.86	116	0.48564		Cell 3 E1-1	214	321.3	1.5014
Cell 12	425.19	735.71	1.73031		Cell 2 E1-2	147	125.7	0.855102		Cell 5 E1-2	284.3	395.4	1.39078
Cell 13	496.85	738.11	1.48558		Cell 3 E1-2	167.3	194	1.15959				Mean	1.16635
Cell 14	306.95	433.6	1.41261		Cell 4 E1-3	81.1	42.4	0.522811				SEM	0.28156
Cell 15	244.84	475.35	1.94147				Mean	0.808125				N	3
Cell 17	484.9	462.25	0.953289				SEM	0.133223
Cell 18	278.25	361.89	1.30059				N	5
		Mean	1.50657
		SEM	0.128543
		N	8
Figure 4E
GluK1-1a					K368-E						K375_379_382H376-E
Rectification index	I -90 mV	I 90 mV	I 90 mV/I -90 mV		Rectification index	I -90 mV	I 90 mV	I 90 mV/I -90 mV			Rectification index	I -90 mV	I 90 mV	I 90 mV/I -90 mV
Cell 2	234.83	216.72	0.92288		Cell 1 E1-4	203.1	0				Cell 2	28.7	37.4	1.30314
Cell 4	211.49	150.1	0.709726		Cell 2 E1-2	225.8	0				Cell 6	28	22.8	0.814286
Cell 5	115.82	114	0.984286		Cell 3 E1-2	88.2	0	No outward currents observed			Cell 3 E1-2	22.1	8.2	0.371041
Cell 14	349.72	434.56	1.24259		Cell 4 E1-3	149.4	0				Cell 3 E1-4	15.4	10.6	0.688312
Cell 15	306.25	444.7	1.45208		Cell 4 E1-4	14.4	0				Cell 4 E1-1	517.77	321	0.619966
Cell 16	986.7	628.91	0.637387		Cell 4 E1-5	21.6	0	N=7			Cell 4 E1-3	22.1	8.2	0.371041
Cell 17	754.5	574.74	0.76175		Cell 8	131.56	0				Cell 5 E1-2	32	6.2	0.19375
		Mean	0.958672										Mean	0.623076
		SEM	0.112332										SEM	0.139273
		N	7										N	7
Raw traces
Figure 4B					Figure 4D
Time (ms)	GluK1-1a	K368-E	K375/379/382H376-E		K368-E			K375/379/382H376-E
0	2.77089	-1.95522	-3.17728		Time (ms)	10 mM Glu	1 mM Kai	Time (ms)	10 mM Glu	1 mM Kai
0.1	2.77089	0.53582	-3.80002		0	0.65373	2.51306	0	-1.28098	5.50839
0.2	0.902611	0.53582	-4.42279		0.1	3.76754	4.38134	0.1	-0.03545	1.14906
0.3	-0.654297	-0.7097	-3.80002		0.2	0.65373	3.13582	0.2	-5.32893	1.46044
0.4	4.63918	-2.57799	-3.80002		0.3	0.03097	-1.22351	0.3	-1.90374	2.39459
0.5	3.70503	0.53582	-5.04556		0.4	0.03097	0.022015	0.4	0.898689	-2.58751
0.6	-1.58844	-0.7097	-5.35693		0.5	0.65373	2.51306	0.5	2.45559	0.837681
0.7	2.77089	-2.57799	-6.29108		0.6	0.65373	2.51306	0.6	-0.9696	4.57425
0.8	2.45952	-3.20075	-0.686218		0.7	-1.21455	1.8903	0.7	3.07835	-2.58751
0.9	-2.52258	-2.57799	-5.04556		0.8	0.65373	0.644775	0.8	0.587303	-1.34198
1	-0.0315323	-1.95522	-8.15936		0.9	1.89925	2.51306	0.9	-2.83788	-0.40784
1.1	-0.965675	-3.82351	-8.47073		1	3.14478	0.022015	1	3.07835	-1.0306
1.2	-0.0315323	-3.20075	-7.84799		1.1	-0.59179	3.13582	1.1	2.76697	-1.96474
1.3	4.95056	-6.93731	-4.11142		1.2	2.52202	1.8903	1.2	2.76697	-1.96474
1.4	5.8847	-5.69179	-3.17728		1.3	-0.59179	1.8903	1.3	-4.0834	-0.40784
1.5	3.08228	-4.44627	-5.97971		1.4	1.27649	2.51306	1.4	-4.70616	1.46044
1.6	3.08228	-1.33246	-7.22522		1.5	0.03097	3.13582	1.5	-2.83788	-2.27612
1.7	2.77089	-1.95522	-7.22522		1.6	-1.21455	0.022015	1.6	-1.90374	-3.21027
1.8	2.77089	-1.95522	-6.91385		1.7	-1.21455	3.75858	1.7	-0.03545	2.39459
1.9	-0.342911	-6.31455	-7.53659		1.8	0.03097	3.13582	1.8	1.52145	2.39459
2	4.01642	-3.82351	-7.53659		1.9	0.03097	-0.60075	1.9	-0.9696	-2.58751
2.1	3.70503	1.15858	-8.7821		2	0.65373	0.644775	2	0.587303	-1.65336
2.2	-0.654297	-0.7097	-8.7821		2.1	1.27649	0.644775	2.1	-5.32893	-3.52165
2.3	4.3278	-0.7097	-8.47073		2.2	0.65373	1.8903	2.2	0.275925	-1.34198
2.4	4.95056	-3.20075	-4.11142		2.3	-0.59179	0.644775	2.3	0.275925	-1.65336
2.5	2.77089	-1.33246	-5.97971		2.4	-1.83731	3.75858	2.4	1.83283	-3.83303
2.6	0.902611	-0.7097	-6.60245		2.5	0.03097	1.8903	2.5	0.587303	-3.52165
2.7	3.70503	-0.7097	-2.5545		2.6	0.65373	0.644775	2.6	-2.83788	-1.65336
2.8	3.70503	-2.57799	0.870667		2.7	2.52202	0.022015	2.7	0.275925	-4.45579
2.9	-0.965675	-3.20075	6.16415		2.8	0.65373	-3.09179	2.8	0.898689	-2.27612
3	1.83675	-0.08694	2.11621		2.9	1.27649	-2.46903	2.9	-0.9696	-2.58751
3.1	0.591232	-0.08694	-0.686218		3	1.27649	-0.60075	3	-1.28098	-1.96474
3.2	5.26194	-2.57799	-0.374847		3.1	0.65373	0.644775	3.1	0.587303	-0.71922
3.3	2.77089	0.53582	-2.24313		3.2	0.65373	-1.22351	3.2	2.14421	-0.09646
3.4	1.83675	-3.82351	4.60724		3.3	1.27649	1.8903	3.3	0.898689	-3.21027
3.5	0.902611	-2.57799	3.6731		3.4	0.03097	-2.46903	3.4	-1.59236	1.77182
3.6	5.26194	-4.44627	-1.30899		3.5	0.03097	-4.96008	3.5	0.275925	2.0832
3.7	7.4416	-0.08694	4.60724		3.6	1.89925	-2.46903	3.6	3.07835	1.77182
3.8	2.45952	1.15858	4.91864		3.7	1.27649	0.022015	3.7	6.19216	-2.58751
3.9	3.39365	-2.57799	0.870667		3.8	0.65373	-0.60075	3.8	-4.0834	1.77182
4	-1.58844	-5.06903	-0.686218		3.9	2.52202	-1.84627	3.9	0.587303	-2.27612
4.1	1.21399	-0.08694	6.78693		4	3.14478	-4.96008	4	2.14421	0.21492
4.2	2.77089	-0.08694	2.11621		4.1	2.52202	-4.33731	4.1	1.83283	1.46044
4.3	-0.965675	-0.08694	-5.04556		4.2	0.03097	-3.09179	4.2	0.275925	-1.34198
4.4	1.21399	-0.08694	-0.0634766		4.3	0.03097	-3.09179	4.3	-1.28098	-2.89889
4.5	5.26194	-0.7097	1.18207		4.4	2.52202	-3.09179	4.4	0.275925	2.39459
4.6	0.279846	-1.95522	-5.04556		4.5	-2.46008	-2.46903	4.5	-2.21512	2.0832
4.7	3.39365	-3.82351	-6.29108		4.6	-0.59179	-1.84627	4.6	1.52145	0.21492
4.8	1.83675	-0.08694	-3.48865		4.7	0.03097	-3.09179	4.7	-1.90374	3.95149
4.9	1.83675	0.53582	-9.09351		4.8	0.03097	-1.84627	4.8	0.898689	-1.65336
5	6.50746	-0.7097	-8.47073		4.9	0.03097	-3.71455	4.9	-1.59236	2.70596
5.1	2.77089	-0.7097	-9.71625		5	0.03097	-0.60075	5	7.1263	2.0832
5.2	4.01642	-2.57799	-9.09351		5.1	-3.7056	-0.60075	5.1	-1.28098	0.837681
5.3	-0.654297	-3.20075	-6.29108		5.2	0.65373	-0.60075	5.2	1.21007	5.50839
5.4	3.70503	-0.7097	-7.53659		5.3	0.65373	-1.84627	5.3	0.898689	-0.09646
5.5	2.45952	-0.08694	-7.22522		5.4	0.65373	-3.09179	5.4	-3.14926	2.39459
5.6	0.279846	1.78134	-0.997589		5.5	0.65373	-3.09179	5.5	0.275925	7.06529
5.7	4.01642	0.53582	-6.91385		5.6	3.14478	-0.60075	5.6	0.275925	2.39459
5.8	-3.45672	-0.08694	-1.30899		5.7	1.89925	1.8903	5.7	-3.14926	3.95149
5.9	-0.965675	1.78134	1.49344		5.8	-1.21455	-2.46903	5.8	-3.14926	3.32873
6	2.45952	-2.57799	3.05035		5.9	-1.83731	-3.71455	5.9	2.76697	0.526302
6.1	0.279846	-2.57799	0.559296		6	-1.83731	1.8903	6	-1.90374	-1.65336
6.2	0.902611	-0.7097	-5.97971		6.1	-1.83731	2.51306	6.1	1.21007	3.64011
6.3	1.83675	-2.57799	-6.29108		6.2	0.03097	0.644775	6.2	-5.6403	-0.09646
6.4	3.70503	1.15858	-10.0276		6.3	-1.83731	1.26754	6.3	-2.21512	0.837681
6.5	1.83675	0.53582	-4.42279		6.4	-1.21455	1.8903	6.4	-1.28098	2.0832
6.6	0.279846	-0.08694	-5.04556		6.5	-0.59179	-1.22351	6.5	2.76697	2.70596
6.7	0.902611	-1.95522	-4.42279		6.6	-2.46008	-1.84627	6.6	2.14421	5.19701
6.8	0.591232	0.53582	-6.60245		6.7	-1.83731	-1.84627	6.7	1.21007	3.01735
6.9	1.21399	2.4041	-5.97971		6.8	-0.59179	-1.22351	6.8	-2.21512	0.837681
7	-0.0315323	-0.7097	-5.97971		6.9	-3.7056	0.022015	6.9	-0.9696	7.68806
7.1	-1.27705	-0.08694	5.54138		7	-1.83731	1.8903	7	0.587303	2.39459
7.2	-0.342911	-2.57799	-7.22522		7.1	1.27649	1.8903	7.1	-3.14926	1.46044
7.3	0.279846	-0.7097	3.6731		7.2	0.65373	4.38134	7.2	-0.03545	3.01735
7.4	5.26194	1.15858	3.05035		7.3	-1.83731	0.644775	7.3	-0.03545	7.06529
7.5	-0.965675	-5.69179	-4.42279		7.4	-1.21455	-1.84627	7.4	0.275925	1.46044
7.6	-4.70224	-2.57799	4.29587		7.5	0.65373	3.75858	7.5	-0.34683	2.39459
7.7	-3.14534	1.15858	0.559296		7.6	2.52202	2.51306	7.6	-2.5265	2.0832
7.8	0.279846	-0.7097	1.18207		7.7	4.3903	-0.60075	7.7	-0.65822	5.50839
7.9	0.902611	-4.44627	1.80481		7.8	0.65373	-1.22351	7.8	-2.21512	5.19701
8	2.77089	0.53582	5.23001		7.9	0.65373	0.644775	7.9	-2.21512	6.75391
8.1	2.77089	-1.95522	5.23001		8	0.65373	0.022015	8	0.275925	6.75391
8.2	-1.58844	-0.08694	3.9845		8.1	3.14478	2.51306	8.1	0.275925	2.70596
8.3	-0.654297	0.53582	-2.24313		8.2	5.01306	5.62686	8.2	-0.34683	6.44253
8.4	2.45952	0.53582	2.11621		8.3	0.03097	5.00411	8.3	2.45559	8.6222
8.5	-3.7681	3.02686	4.91864		8.4	-0.59179	3.75858	8.4	4.32388	7.68806
8.6	0.279846	-1.33246	4.29587		8.5	0.65373	3.75858	8.5	1.83283	6.75391
8.7	-0.0315323	0.53582	0.870667		8.6	-0.59179	1.26754	8.6	-0.03545	6.44253
8.8	3.08228	1.78134	6.47552		8.7	-1.21455	4.38134	8.7	1.83283	8.6222
8.9	-1.89981	-3.20075	10.5235		8.8	0.65373	2.51306	8.8	1.52145	7.06529
9	0.902611	-3.20075	8.03244		8.9	5.63582	1.8903	8.9	3.07835	6.13115
9.1	-3.45672	-0.7097	4.91864		9	5.63582	-0.60075	9	2.14421	5.19701
9.2	0.279846	1.78134	7.40967		9.1	3.14478	-2.46903	9.1	2.14421	4.57425
9.3	1.83675	-1.95522	3.9845		9.2	-1.21455	-1.22351	9.2	3.38973	4.88563
9.4	3.70503	-2.57799	3.36172		9.3	-2.46008	0.644775	9.3	2.76697	2.39459
9.5	-1.27705	0.53582	7.72104		9.4	-0.59179	-3.09179	9.4	-4.0834	0.837681
9.6	-3.7681	1.15858	8.03244		9.5	-1.83731	-0.60075	9.5	-0.65822	-4.14441
9.7	2.14813	-0.7097	10.2121		9.6	-1.21455	-4.96008	9.6	1.21007	-10.6834
9.8	-2.2112	-0.08694	8.03244		9.7	1.27649	-8.07388	9.7	-3.77203	-14.1086
9.9	-3.7681	1.15858	5.54138		9.8	-0.59179	-9.94217	9.8	-3.77203	-13.7972
10	0.279846	-2.57799	7.72104		9.9	1.27649	-13.056	9.9	-2.21512	-16.5996
10.1	-0.965675	-3.20075	11.1462		10	5.63582	-14.9243	10	-11.2452	-15.3541
10.2	-0.654297	0.53582	7.0983		10.1	3.14478	-17.4153	10.1	-18.0955	-16.911
10.3	-7.81605	2.4041	2.11621		10.2	0.65373	-18.0381	10.2	-20.898	-16.911
10.4	-5.63638	1.78134	2.73895		10.3	1.27649	-18.6608	10.3	-27.7483	-22.2045
10.5	-5.01363	-0.7097	8.65518		10.4	0.65373	-25.5112	10.4	-30.8621	-22.5159
10.6	-6.57053	-0.7097	4.60724		10.5	-9.93321	-28.0022	10.5	-37.0898	-27.8093
10.7	-0.0315323	1.78134	7.0983		10.6	-9.31045	-33.6071	10.6	-42.6946	-28.4321
10.8	-3.7681	1.15858	5.54138		10.7	-17.4063	-40.4575	10.7	-50.7905	-27.498
10.9	-2.52258	1.15858	8.65518		10.8	-23.634	-44.8168	10.8	-51.7246	-24.3841
11	0.279846	5.51791	3.6731		10.9	-27.3705	-47.9306	10.9	-55.1498	-29.0549
11.1	-0.654297	3.64963	1.18207		11	-34.2209	-47.3078	11	-53.9043	-29.3662
11.2	-1.89981	-2.57799	-3.48865		11.1	-39.8258	-51.0444	11.1	-62.623	-31.2345
11.3	-6.57053	-3.82351	-21.2373		11.2	-39.8258	-55.4037	11.2	-62.9343	-36.2166
11.4	-14.0437	-1.33246	-91.298		11.3	-40.4485	-56.0265	11.3	-66.0481	-33.1028
11.5	-18.403	-5.06903	-213.359		11.4	-52.281	-52.9127	11.4	-65.4254	-33.7256
11.6	-20.894	-7.56008	-396.451		11.5	-52.281	-56.0265	11.5	-67.9164	-42.7556
11.7	-23.3851	-8.8056	-606.01		11.6	-62.2452	-56.0265	11.6	-71.0302	-36.8394
11.8	-29.6127	-13.1649	-769.174		11.7	-74.0776	-55.4037	11.7	-70.7189	-39.9532
11.9	-37.7086	-26.2429	-917.702		11.8	-79.6825	-61.6314	11.8	-76.9465	-44.0011
12	-51.7207	-38.6981	-1024.19		11.9	-90.8922	-65.3679	11.9	-86.2879	-47.7377
12.1	-69.158	-50.5306	-1095.19		12	-100.234	-72.2183	12	-80.0603	-52.4084
12.2	-85.3498	-69.8362	-1173.03		12.1	-107.084	-73.4638	12.1	-77.5692	-52.097
12.3	-119.29	-84.7825	-1242.16		12.2	-112.689	-72.8411	12.2	-81.3058	-60.1929
12.4	-148.249	-99.106	-1293.54		12.3	-120.785	-74.0866	12.3	-84.4196	-67.9774
12.5	-177.83	-116.543	-1330.59		12.4	-127.012	-78.4459	12.4	-82.5513	-63.3067
12.6	-205.231	-129.621	-1378.23		12.5	-137.599	-82.8052	12.5	-80.9944	-64.2409
12.7	-239.172	-139.585	-1421.2		12.6	-144.45	-87.7873	12.6	-82.5513	-60.8157
12.8	-273.735	-158.891	-1457.32		12.7	-143.827	-94.0149	12.7	-89.0903	-59.5702
12.9	-297.089	-170.101	-1484.73		12.8	-143.827	-90.9011	12.8	-90.0245	-63.6181
13	-317.328	-176.951	-1501.23		12.9	-140.09	-90.2784	12.9	-90.6472	-69.223
13.1	-342.55	-183.802	-1485.66		13	-136.977	-87.1646	13	-102.791	-67.9774
13.2	-361.233	-195.634	-1490.95		13.1	-136.977	-89.0328	13.1	-114.001	-70.4685
13.3	-378.67	-206.221	-1508.08		13.2	-144.45	-91.5239	13.2	-120.54	-72.0254
13.4	-389.569	-213.694	-1517.73		13.3	-146.941	-89.6556	13.3	-121.474	-78.253
13.5	-395.174	-219.922	-1513.06		13.4	-147.563	-83.428	13.4	-131.438	-85.4147
13.6	-401.713	-223.658	-1495.62		13.5	-141.959	-86.5418	13.5	-135.175	-91.9538
13.7	-403.892	-229.263	-1504.03		13.6	-138.845	-82.1825	13.6	-138.911	-90.7082
13.8	-402.335	-228.018	-1515.55		13.7	-136.354	-84.0508	13.7	-150.121	-95.6903
13.9	-402.335	-222.413	-1533.61		13.8	-136.354	-90.2784	13.8	-152.612	-101.295
14	-402.647	-224.281	-1529.57		13.9	-135.108	-86.5418	13.9	-153.235	-108.457
14.1	-401.401	-222.413	-1535.48		14	-131.372	-82.1825	14	-153.546	-105.032
14.2	-398.599	-224.904	-1550.43		14.1	-124.521	-80.937	14.1	-161.019	-104.409
14.3	-396.419	-229.886	-1545.76		14.2	-122.653	-82.1825	14.2	-166.935	-111.259
14.4	-400.156	-230.509	-1551.98		14.3	-121.407	-80.937	14.3	-166.313	-115.93
14.5	-397.042	-232.377	-1553.23		14.4	-120.785	-76.5776	14.4	-168.181	-114.373
14.6	-389.257	-232.377	-1557.28		14.5	-124.521	-79.0687	14.5	-173.474	-118.421
14.7	-392.994	-231.131	-1572.85		14.6	-117.048	-80.3142	14.6	-181.882	-129.942
14.8	-395.796	-226.149	-1593.09		14.7	-112.066	-79.6914	14.7	-184.996	-132.122
14.9	-390.191	-223.035	-1591.84		14.8	-104.593	-83.428	14.8	-183.75	-133.367
15	-381.161	-223.035	-1595.58		14.9	-102.102	-84.0508	14.9	-190.289	-129.631
15.1	-372.131	-221.167	-1579.7		15	-97.7425	-83.428	15	-194.96	-136.17
15.2	-372.443	-221.79	-1572.22		15.1	-95.2515	-82.1825	15.1	-207.726	-136.793
15.3	-365.904	-222.413	-1571.29		15.2	-94.006	-80.3142	15.2	-212.086	-143.643
15.4	-366.215	-219.922	-1578.45		15.3	-92.7605	-80.3142	15.3	-208.038	-140.84
15.5	-362.479	-221.79	-1575.65		15.4	-92.7605	-80.3142	15.4	-206.481	-142.086
15.6	-356.562	-219.299	-1566.31		15.5	-91.5149	-77.2004	15.5	-209.906	-149.248
15.7	-345.664	-213.071	-1568.49		15.6	-85.2873	-79.0687	15.6	-207.104	-161.08
15.8	-342.239	-210.58	-1568.18		15.7	-80.928	-81.5597	15.7	-205.547	-161.392
15.9	-342.55	-208.712	-1563.19		15.8	-80.928	-84.6735	15.8	-217.69	-169.799
16	-340.993	-207.466	-1568.49		15.9	-76.5687	-84.0508	15.9	-237.619	-177.895
16.1	-333.832	-204.353	-1569.42		16	-72.8321	-86.5418	16	-248.517	-179.763
16.2	-330.718	-199.993	-1556.34		16.1	-74.7004	-86.5418	16.1	-250.385	-181.943
16.3	-330.406	-199.371	-1539.53		16.2	-74.0776	-85.2963	16.2	-255.99	-177.895
16.4	-326.67	-200.616	-1518.04		16.3	-72.8321	-84.6735	16.3	-249.14	-182.566
16.5	-325.113	-195.634	-1513.68		16.4	-74.0776	-81.5597	16.4	-252.254	-193.464
16.6	-322.31	-190.652	-1504.97		16.5	-77.8142	-83.428	16.5	-258.17	-198.446
16.7	-319.508	-185.67	-1501.23		16.6	-75.9459	-82.1825	16.6	-268.446	-201.871
16.8	-315.149	-180.065	-1491.27		16.7	-72.8321	-81.5597	16.7	-272.805	-205.919
16.9	-305.807	-173.837	-1474.76		16.8	-71.5866	-79.0687	16.8	-270.002	-210.901
17	-301.448	-168.232	-1472.58		16.9	-70.3411	-81.5597	16.9	-266.577	-209.656
17.1	-299.58	-164.496	-1460.75		17	-67.85	-80.937	17	-275.296	-207.476
17.2	-288.993	-166.364	-1456.08		17.1	-67.85	-76.5776	17.1	-284.949	-209.344
17.3	-284.945	-163.25	-1452.65		17.2	-66.6045	-75.3321	17.2	-285.26	-211.213
17.4	-282.454	-168.232	-1432.73		17.3	-67.85	-79.6914	17.3	-282.458	-214.638
17.5	-274.981	-164.496	-1418.71		17.4	-65.9817	-80.3142	17.4	-289.308	-207.476
17.6	-275.915	-162.628	-1390.38		17.5	-67.85	-82.8052	17.5	-290.865	-196.889
17.7	-276.849	-164.496	-1383.22		17.6	-64.1134	-82.1825	17.6	-284.637	-200.003
17.8	-268.753	-157.023	-1372.94		17.7	-60.9996	-82.1825	17.7	-284.949	-205.919
17.9	-263.771	-157.023	-1362.04		17.8	-57.2631	-83.428	17.8	-294.29	-205.296
18	-259.1	-148.927	-1356.44		17.9	-54.772	-82.1825	17.9	-300.206	-210.278
18.1	-255.364	-149.55	-1337.44		18	-53.5265	-87.7873	18	-298.961	-217.129
18.2	-253.184	-151.418	-1313.47		18.1	-57.8858	-88.4101	18.1	-293.356	-220.554
18.3	-246.645	-146.436	-1312.53		18.2	-56.6403	-86.5418	18.2	-293.356	-227.716
18.4	-244.465	-147.681	-1313.16		18.3	-55.3948	-84.0508	18.3	-302.075	-244.219
18.5	-236.992	-147.681	-1304.44		18.4	-62.8679	-84.0508	18.4	-300.206	-255.74
18.6	-233.256	-144.568	-1287		18.5	-64.7362	-84.0508	18.5	-288.685	-258.854
18.7	-232.633	-143.945	-1278.28		18.6	-59.7541	-82.1825	18.6	-280.901	-261.345
18.8	-217.687	-143.945	-1280.15		18.7	-56.6403	-84.0508	18.7	-274.673	-262.59
18.9	-207.1	-140.208	-1270.19		18.8	-55.3948	-85.2963	18.8	-267.2	-270.375
19	-211.148	-140.208	-1268.63		18.9	-54.772	-86.5418	18.9	-271.559	-264.459
19.1	-212.704	-137.717	-1241.23		19	-54.1493	-87.1646	19	-269.691	-266.327
19.2	-203.674	-137.717	-1219.43		19.1	-49.7899	-86.5418	19.1	-262.841	-270.375
19.3	-198.07	-139.585	-1206.04		19.2	-51.0355	-83.428	19.2	-259.104	-267.261
19.4	-198.381	-140.208	-1185.8		19.3	-51.6582	-84.6735	19.3	-254.745	-265.393
19.5	-195.89	-143.945	-1166.18		19.4	-51.6582	-84.6735	19.4	-252.877	-262.902
19.6	-185.614	-142.699	-1173.03		19.5	-51.6582	-82.8052	19.5	-251.008	-262.59
19.7	-184.992	-142.077	-1171.48		19.6	-53.5265	-85.2963	19.6	-244.158	-257.297
19.8	-182.501	-138.34	-1147.19		19.7	-55.3948	-86.5418	19.7	-249.451	-268.818
19.9	-178.141	-132.735	-1121.66		19.8	-50.4127	-87.7873	19.8	-255.056	-277.537
20	-175.339	-133.981	-1096.43		19.9	-47.9216	-92.1467	19.9	-254.433	-277.537
20.1	-175.339	-134.603	-1093.63		20	-49.1672	-90.2784	20	-255.056	-281.585
20.2	-173.471	-133.981	-1097.68		20.1	-47.2989	-90.2784	20.1	-255.368	-280.962
20.3	-174.093	-129.621	-1087.4		20.2	-49.1672	-85.2963	20.2	-260.35	-278.159
20.4	-172.536	-125.885	-1078.06		20.3	-49.1672	-84.0508	20.3	-258.481	-278.471
20.5	-167.866	-124.639	-1068.72		20.4	-49.7899	-82.8052	20.4	-252.877	-268.818
20.6	-161.327	-121.525	-1071.84		20.5	-48.5444	-78.4459	20.5	-249.14	-263.836
20.7	-158.836	-122.148	-1067.16		20.6	-49.7899	-81.5597	20.6	-245.403	-271.932
20.8	-159.77	-117.789	-1061.56		20.7	-48.5444	-83.428	20.7	-245.092	-272.555
20.9	-158.524	-118.412	-1049.42		20.8	-50.4127	-82.8052	20.8	-234.194	-284.076
21	-155.099	-115.298	-1045.37		20.9	-46.6761	-84.6735	20.9	-232.948	-285.321
21.1	-155.099	-115.298	-1031.67		21	-42.9396	-86.5418	21	-221.116	-291.86
21.2	-147.937	-114.675	-1030.42		21.1	-42.9396	-83.428	21.1	-224.852	-309.297
21.3	-142.332	-110.316	-1014.23		21.2	-44.1851	-85.919	21.2	-226.409	-313.034
21.4	-141.398	-106.579	-995.859		21.3	-44.1851	-85.919	21.3	-225.786	-311.477
21.5	-140.776	-105.334	-982.469		21.4	-44.1851	-82.8052	21.4	-224.229	-316.771
21.6	-142.021	-107.825	-984.338		21.5	-46.6761	-81.5597	21.5	-226.409	-319.262
21.7	-140.153	-108.447	-989.631		21.6	-49.1672	-80.3142	21.6	-230.457	-318.95
21.8	-139.219	-107.825	-983.403		21.7	-46.0534	-80.3142	21.7	-226.098	-326.112
21.9	-139.841	-107.202	-970.014		21.8	-44.1851	-77.2004	21.8	-224.541	-326.735
22	-139.219	-102.22	-959.116		21.9	-44.8078	-76.5776	21.9	-227.032	-342.304
22.1	-136.416	-104.711	-965.343		22	-44.8078	-77.2004	22	-227.966	-335.453
22.2	-133.614	-105.956	-970.637		22.1	-44.8078	-79.0687	22.1	-227.966	-334.831
22.3	-134.548	-102.22	-956.313		22.2	-42.3168	-75.3321	22.2	-226.098	-331.405
22.4	-133.925	-103.465	-946.349		22.3	-47.9216	-73.4638	22.3	-218.625	-327.357
22.5	-130.189	-102.843	-941.99		22.4	-46.0534	-74.0866	22.4	-216.756	-319.262
22.6	-125.518	-97.2377	-934.205		22.5	-44.8078	-79.0687	22.5	-216.445	-314.902
22.7	-123.027	-97.2377	-921.75		22.6	-42.9396	-82.1825	22.6	-209.595	-320.196
22.8	-119.29	-94.1239	-910.54		22.7	-42.9396	-86.5418	22.7	-202.744	-321.753
22.9	-113.374	-94.7467	-903.379		22.8	-44.1851	-82.1825	22.8	-206.792	-322.375
23	-115.865	-94.1239	-903.69		22.9	-43.5623	-82.8052	22.9	-202.121	-325.801
23.1	-109.949	-97.2377	-892.48		23	-42.3168	-82.1825	23	-203.99	-330.783
23.2	-105.59	-94.1239	-880.025		23.1	-43.5623	-81.5597	23.1	-200.876	-329.849
23.3	-105.901	-94.7467	-861.031		23.2	-41.694	-79.6914	23.2	-192.78	-325.801
23.4	-98.7392	-95.9922	-856.983		23.3	-42.3168	-80.937	23.3	-198.385	-332.962
23.5	-98.1164	-95.9922	-860.719		23.4	-44.8078	-80.3142	23.4	-199.942	-332.962
23.6	-100.919	-98.4832	-864.145		23.5	-41.694	-79.0687	23.5	-198.074	-325.801
23.7	-94.3799	-92.8784	-857.294		23.6	-43.5623	-79.6914	23.6	-195.894	-324.555
23.8	-90.9547	-90.3873	-846.085		23.7	-43.5623	-79.6914	23.7	-192.78	-329.537
23.9	-96.2482	-86.028	-844.839		23.8	-44.1851	-81.5597	23.8	-192.469	-322.687
24	-93.1343	-82.9142	-847.019		23.9	-42.9396	-82.8052	23.9	-194.026	-316.771
24.1	-90.3319	-81.0459	-840.48		24	-40.4485	-80.3142	24	-187.487	-318.016
24.2	-88.4636	-77.9321	-833.629		24.1	-37.9575	-76.5776	24.1	-176.588	-321.13
24.3	-88.4636	-77.9321	-826.779		24.2	-41.0713	-77.8231	24.2	-169.427	-315.836
24.4	-86.284	-79.1776	-825.533		24.3	-39.8258	-74.7093	24.3	-160.708	-317.705
24.5	-87.5295	-84.1597	-816.192		24.4	-39.8258	-75.9549	24.4	-159.151	-322.375
24.6	-92.5116	-84.1597	-810.587		24.5	-39.8258	-74.7093	24.5	-152.923	-317.705
24.7	-86.284	-81.6687	-809.653		24.6	-42.9396	-75.3321	24.6	-151.989	-315.525
24.8	-83.7929	-80.4231	-816.192		24.7	-40.4485	-79.6914	24.7	-153.546	-327.669
24.9	-76.9426	-82.9142	-798.443		24.8	-41.0713	-81.5597	24.8	-150.121	-332.028
25	-76.0084	-76.0638	-790.036		24.9	-39.8258	-86.5418	24.9	-148.875	-325.801
25.1	-80.0564	-73.5728	-782.563		25	-38.5802	-85.919	25	-146.384	-326.112
25.2	-80.9905	-74.1955	-774.156		25.1	-39.203	-87.1646	25.1	-145.45	-331.405
25.3	-78.4995	-73.5728	-775.401		25.2	-37.9575	-86.5418	25.2	-146.073	-323.932
25.4	-76.6312	-70.459	-764.814		25.3	-36.7119	-85.919	25.3	-147.941	-316.459
25.5	-71.3377	-70.459	-757.341		25.4	-36.7119	-82.8052	25.4	-137.354	-318.95
25.6	-74.7629	-69.2134	-748		25.5	-31.1071	-84.0508	25.5	-130.504	-322.064
25.7	-73.206	-64.8541	-741.149		25.6	-32.9754	-89.0328	25.6	-133.618	-317.705
25.8	-70.4035	-65.4769	-734.922		25.7	-33.5981	-89.0328	25.7	-126.767	-330.471
25.9	-63.5532	-72.3272	-726.514		25.8	-31.1071	-83.428	25.8	-129.57	-336.076
26	-65.1101	-73.5728	-719.664		25.9	-33.5981	-87.1646	25.9	-122.408	-331.094
26.1	-66.0442	-68.5907	-715.927		26	-31.1071	-87.7873	26	-118.983	-328.603
26.2	-60.4394	-72.3272	-713.125		26.1	-29.8616	-85.919	26.1	-116.18	-335.142
26.3	-60.4394	-69.2134	-705.341		26.2	-27.9933	-83.428	26.2	-118.36	-338.567
26.4	-58.8825	-68.5907	-691.64		26.3	-25.5022	-84.6735	26.3	-119.917	-353.513
26.5	-61.6849	-69.8362	-690.394		26.4	-27.9933	-83.428	26.4	-119.917	-348.531
26.6	-67.6011	-69.2134	-687.592		26.5	-29.2388	-84.6735	26.5	-113.067	-347.909
26.7	-66.3556	-69.2134	-685.724		26.6	-23.634	-84.0508	26.6	-110.264	-347.286
26.8	-66.0442	-65.4769	-681.364		26.7	-24.8795	-84.6735	26.7	-116.492	-347.286
26.9	-64.7987	-64.2314	-677.628		26.8	-25.5022	-87.1646	26.8	-111.51	-347.286
27	-65.1101	-66.7224	-674.514		26.9	-26.7478	-86.5418	26.9	-106.839	-336.699
27.1	-58.8825	-65.4769	-671.711		27	-29.2388	-89.6556	27	-112.755	-327.046
27.2	-64.4873	-62.3631	-666.107		27.1	-26.7478	-91.5239	27.1	-106.528	-342.304
27.3	-56.7028	-62.9858	-662.993		27.2	-24.8795	-90.2784	27.2	-101.857	-354.136
27.4	-59.5052	-62.3631	-663.616		27.3	-24.8795	-87.7873	27.3	-104.037	-360.364
27.5	-60.4394	-59.872	-656.765		27.4	-26.125	-87.1646	27.4	-105.593	-368.46
27.6	-57.3256	-59.2493	-655.208		27.5	-26.7478	-89.6556	27.5	-108.085	-358.807
27.7	-58.8825	-58.0037	-649.915		27.6	-24.8795	-88.4101	27.6	-105.593	-348.843
27.8	-55.1459	-54.8899	-659.879		27.7	-24.8795	-89.6556	27.7	-101.546	-345.418
27.9	-51.4093	-49.9078	-649.603		27.8	-24.2567	-90.2784	27.8	-99.6773	-343.549
28	-52.6549	-49.9078	-643.064		27.9	-26.7478	-90.2784	27.9	-99.6773	-340.124
28.1	-47.9841	-51.1534	-639.328		28	-26.125	-89.0328	28	-106.216	-336.076
28.2	-48.6069	-49.2851	-637.148		28.1	-28.616	-89.0328	28.1	-106.839	-335.142
28.3	-49.8524	-49.2851	-634.969		28.2	-26.125	-92.1467	28.2	-108.085	-338.879
28.4	-48.2955	-56.1355	-644.31		28.3	-23.634	-93.3922	28.3	-113.378	-348.22
28.5	-47.05	-56.1355	-650.226		28.4	-25.5022	-91.5239	28.4	-112.132	-341.992
28.6	-47.3614	-56.7582	-645.244		28.5	-24.2567	-91.5239	28.5	-106.839	-347.909
28.7	-52.3435	-58.0037	-637.148		28.6	-23.634	-89.6556	28.6	-109.953	-349.777
28.8	-48.6069	-52.3989	-634.657		28.7	-26.125	-84.0508	28.7	-108.085	-355.07
28.9	-48.9183	-54.2672	-634.657		28.8	-23.634	-79.6914	28.8	-105.905	-356.939
29	-50.1638	-54.2672	-628.118		28.9	-22.3884	-79.0687	28.9	-110.576	-356.005
29.1	-49.8524	-49.9078	-626.561		29	-21.1429	-79.0687	29	-109.953	-363.166
29.2	-49.8524	-51.7761	-625.004		29.1	-21.7657	-76.5776	29.1	-108.085	-355.07
29.3	-47.05	-56.7582	-616.597		29.2	-23.0112	-80.937	29.2	-106.528	-352.268
29.4	-43.6248	-54.2672	-607.567		29.3	-23.634	-80.3142	29.3	-110.264	-356.627
29.5	-42.6907	-53.0216	-608.813		29.4	-21.7657	-79.0687	29.4	-109.019	-349.777
29.6	-45.1817	-53.0216	-606.322		29.5	-24.2567	-76.5776	29.5	-109.33	-351.022
29.7	-46.7386	-51.1534	-613.483		29.6	-25.5022	-75.9549	29.6	-114.001	-355.382
29.8	-44.2476	-48.0396	-616.286		29.7	-26.125	-78.4459	29.7	-116.492	-362.544
29.9	-40.8224	-50.5306	-604.453		29.8	-25.5022	-77.8231	29.8	-112.444	-360.675
30	-43.0021	-50.5306	-598.537		29.9	-24.8795	-75.3321	29.9	-110.887	-356.939
30.1	-42.3793	-47.4168	-582.345		30	-26.125	-77.2004	30	-114.935	-354.136
30.2	-43.9362	-45.5485	-578.609		30.1	-27.3705	-76.5776	30.1	-117.426	-355.693
30.3	-47.6728	-47.4168	-566.465		30.2	-24.2567	-77.8231	30.2	-116.492	-351.957
30.4	-42.0679	-46.794	-564.908		30.3	-26.125	-79.0687	30.3	-113.378	-351.334
30.5	-42.0679	-46.1713	-565.531		30.4	-26.7478	-79.0687	30.4	-107.15	-342.927
30.6	-41.1338	-46.794	-551.83		30.5	-24.8795	-74.7093	30.5	-112.132	-332.962
30.7	-40.1996	-46.794	-556.501		30.6	-24.8795	-72.8411	30.6	-114.624	-339.19
30.8	-36.4631	-47.4168	-561.171		30.7	-26.7478	-75.3321	30.7	-114.624	-356.627
30.9	-36.7744	-44.303	-565.219		30.8	-27.3705	-78.4459	30.8	-106.528	-360.987
31	-40.8224	-43.6802	-563.351		30.9	-26.7478	-76.5776	30.9	-115.246	-362.855
31.1	-38.3314	-43.6802	-558.992		31	-25.5022	-75.9549	31	-107.773	-361.921
31.2	-40.511	-44.303	-555.255		31.1	-23.634	-74.0866	31.1	-111.51	-363.789
31.3	-41.4452	-41.8119	-552.141		31.2	-26.7478	-69.1045	31.2	-112.755	-361.298
31.4	-42.0679	-43.0575	-544.357		31.3	-23.634	-70.35	31.3	-117.737	-352.891
31.5	-40.1996	-39.9437	-540.309		31.4	-24.8795	-70.9728	31.4	-119.606	-348.843
31.6	-44.2476	-43.0575	-541.866		31.5	-18.6519	-72.8411	31.5	-114.312	-345.729
31.7	-38.6427	-43.6802	-545.291		31.6	-21.7657	-74.7093	31.6	-120.228	-337.01
31.8	-38.9541	-40.5664	-542.8		31.7	-22.3884	-71.5955	31.7	-117.115	-341.058
31.9	-46.1159	-41.1892	-539.063		31.8	-20.5202	-72.2183	31.8	-119.294	-341.37
32	-38.6427	-42.4347	-531.902		31.9	-22.3884	-72.2183	31.9	-118.36	-341.058
32.1	-37.0858	-43.0575	-532.524		32	-23.634	-74.7093	32	-110.887	-339.813
32.2	-41.4452	-44.9258	-526.919		32.1	-24.2567	-72.8411	32.1	-108.085	-340.435
32.3	-44.559	-44.9258	-522.56		32.2	-24.2567	-73.4638	32.2	-105.905	-336.699
32.4	-38.3314	-45.5485	-518.512		32.3	-25.5022	-79.0687	32.3	-105.905	-336.076
32.5	-42.3793	-46.1713	-518.824		32.4	-24.8795	-80.937	32.4	-101.857	-341.681
32.6	-40.1996	-46.1713	-512.596		32.5	-26.125	-81.5597	32.5	-101.857	-346.04
32.7	-40.511	-43.0575	-502.943		32.6	-23.634	-79.0687	32.6	-97.4976	-339.813
32.8	-39.8883	-43.6802	-497.338		32.7	-23.634	-80.3142	32.7	-96.2521	-350.088
32.9	-41.1338	-39.9437	-498.584		32.8	-23.634	-81.5597	32.8	-101.234	-356.005
33	-39.5769	-36.8299	-497.65		32.9	-22.3884	-84.6735	32.9	-98.4317	-352.579
33.1	-42.0679	-35.5843	-499.207		33	-25.5022	-83.428	33	-100.3	-351.022
33.2	-41.4452	-36.8299	-502.009		33.1	-23.634	-85.2963	33.1	-105.593	-351.334
33.3	-40.1996	-38.6981	-502.632		33.2	-23.0112	-87.1646	33.2	-104.348	-361.921
33.4	-38.9541	-36.2071	-500.141		33.3	-21.7657	-82.8052	33.3	-101.546	-360.052
33.5	-41.4452	-34.9616	-494.224		33.4	-24.2567	-83.428	33.4	-104.037	-352.579
33.6	-42.0679	-34.9616	-492.045		33.5	-24.8795	-81.5597	33.5	-101.857	-351.022
33.7	-46.4272	-36.8299	-501.386		33.6	-23.634	-83.428	33.6	-101.234	-353.202
33.8	-41.1338	-38.0754	-492.356		33.7	-26.125	-75.9549	33.7	-97.1862	-361.609
33.9	-37.0858	-35.5843	-485.194		33.8	-24.8795	-71.5955	33.8	-97.1862	-364.1
34	-39.5769	-34.3388	-486.129		33.9	-22.3884	-70.9728	33.9	-101.234	-375.621
34.1	-40.8224	-33.716	-485.194		34	-20.5202	-72.2183	34	-99.9886	-377.801
34.2	-37.3972	-30.6022	-475.542		34.1	-23.634	-74.0866	34.1	-98.1204	-367.837
34.3	-35.5289	-33.0933	-469.937		34.2	-26.7478	-75.9549	34.2	-94.3838	-364.1
34.4	-37.3972	-31.8478	-477.721		34.3	-25.5022	-75.9549	34.3	-91.27	-363.166
34.5	-41.4452	-34.3388	-486.751		34.4	-23.0112	-73.4638	34.4	-95.0065	-354.136
34.6	-43.0021	-33.716	-487.063		34.5	-24.8795	-72.2183	34.5	-93.4496	-356.627
34.7	-40.1996	-34.9616	-485.194		34.6	-23.634	-73.4638	34.6	-93.761	-355.693
34.8	-43.3134	-38.0754	-481.769		34.7	-21.7657	-74.0866	34.7	-93.1383	-359.118
34.9	-42.0679	-38.6981	-475.853		34.8	-21.1429	-76.5776	34.8	-89.4017	-369.082
35	-39.8883	-36.2071	-476.787		34.9	-23.0112	-75.3321	34.9	-91.5814	-366.28
35.1	-40.511	-41.1892	-468.691		35	-21.1429	-74.0866	35	-90.0245	-358.184
35.2	-33.0379	-41.8119	-469.314		35.1	-21.1429	-74.0866	35.1	-94.6952	-356.939
35.3	-32.7265	-39.9437	-469.625		35.2	-20.5202	-74.7093	35.2	-93.4496	-354.759
35.4	-32.1037	-36.2071	-466.2		35.3	-18.0291	-77.2004	35.3	-90.0245	-356.939
35.5	-36.1517	-36.8299	-456.859		35.4	-17.4063	-80.3142	35.4	-89.0903	-347.909
35.6	-33.3493	-37.4526	-452.5		35.5	-18.0291	-82.8052	35.5	-83.4855	-338.879
35.7	-33.972	-38.0754	-445.649		35.6	-16.7836	-82.1825	35.6	-83.4855	-340.435
35.8	-34.9062	-39.3209	-450.008		35.7	-18.0291	-83.428	35.7	-79.7489	-341.992
35.9	-32.7265	-38.0754	-445.649		35.8	-17.4063	-85.919	35.8	-78.192	-342.927
36	-30.8582	-38.6981	-432.883		35.9	-14.9153	-84.6735	35.9	-75.701	-348.843
36.1	-33.0379	-40.5664	-434.439		36	-14.2925	-85.919	36	-81.3058	-353.513
36.2	-31.1696	-40.5664	-435.685		36.1	-15.5381	-84.0508	36.1	-84.1082	-352.268
36.3	-34.5948	-36.2071	-436.619		36.2	-17.4063	-82.1825	36.2	-82.2399	-360.052
36.4	-30.2355	-30.6022	-432.26		36.3	-14.9153	-87.1646	36.3	-84.731	-374.687
36.5	-26.8103	-29.3567	-430.703		36.4	-13.6698	-84.6735	36.4	-78.8148	-379.358
36.6	-27.1216	-30.6022	-428.523		36.5	-16.7836	-85.2963	36.5	-77.8806	-373.13
36.7	-30.5468	-32.4705	-432.571		36.6	-16.7836	-80.3142	36.6	-79.1261	-368.46
36.8	-26.4989	-27.4884	-430.391		36.7	-18.0291	-80.937	36.7	-72.8985	-374.376
36.9	-29.6127	-32.4705	-440.044		36.8	-16.7836	-79.0687	36.8	-66.0481	-372.819
37	-30.2355	-29.3567	-435.374		36.9	-16.7836	-82.1825	36.9	-66.3595	-365.035
37.1	-28.9899	-29.3567	-438.799		37	-19.8974	-81.5597	37	-65.7368	-370.017
37.2	-29.6127	-29.9795	-439.733		37.1	-16.7836	-81.5597	37.1	-62.623	-367.214
37.3	-28.6786	-29.9795	-434.128		37.2	-16.7836	-82.8052	37.2	-64.1799	-365.969
37.4	-23.6965	-29.3567	-432.883		37.3	-15.5381	-86.5418	37.3	-67.2937	-344.795
37.5	-24.6306	-31.8478	-425.098		37.4	-14.2925	-84.6735	37.4	-66.6709	-330.783
37.6	-29.3013	-29.9795	-418.559		37.5	-15.5381	-82.8052	37.5	-64.8026	-347.597
37.7	-28.0558	-28.1112	-403.924		37.6	-20.5202	-82.1825	37.6	-61.0661	-343.861
37.8	-24.6306	-24.9974	-404.236		37.7	-18.6519	-82.1825	37.7	-64.4912	-343.861
37.9	-30.8582	-26.2429	-402.99		37.8	-17.4063	-81.5597	37.8	-61.0661	-359.43
38	-26.4989	-28.1112	-414.2		37.9	-18.0291	-87.1646	37.9	-58.2636	-355.07
38.1	-28.0558	-29.3567	-412.643		38	-20.5202	-84.0508	38	-63.5571	-346.663
38.2	-29.9241	-30.6022	-412.331		38.1	-19.2746	-86.5418	38.1	-65.4254	-342.304
38.3	-29.9241	-30.6022	-412.954		38.2	-19.2746	-84.6735	38.2	-65.7368	-344.795
38.4	-29.9241	-27.4884	-408.283		38.3	-18.6519	-83.428	38.3	-66.9823	-338.567
38.5	-26.4989	-30.6022	-406.104		38.4	-18.0291	-83.428	38.4	-56.7067	-337.01
38.6	-24.6306	-24.9974	-398.942		38.5	-20.5202	-83.428	38.5	-56.7067	-338.256
38.7	-24.0078	-27.4884	-395.828		38.6	-17.4063	-84.0508	38.6	-60.4433	-341.058
38.8	-24.0078	-26.8657	-391.158		38.7	-19.2746	-84.6735	38.7	-59.8205	-340.747
38.9	-23.0737	-29.9795	-382.439		38.8	-20.5202	-80.937	38.8	-58.8864	-338.256
39	-21.5168	-31.8478	-377.145		38.9	-23.634	-84.0508	38.9	-64.8026	-331.717
39.1	-17.4688	-29.3567	-375.589		39	-21.1429	-83.428	39	-63.2457	-339.19
39.2	-16.8461	-28.734	-386.798		39.1	-24.2567	-80.937	39.1	-60.4433	-337.322
39.3	-19.3371	-28.734	-390.535		39.2	-23.0112	-79.6914	39.2	-60.7547	-331.094
39.4	-21.2054	-26.2429	-384.93		39.3	-19.8974	-81.5597	39.3	-65.7368	-332.028
39.5	-24.0078	-25.6202	-385.241		39.4	-20.5202	-80.3142	39.4	-66.3595	-338.256
39.6	-21.8282	-27.4884	-389.601		39.5	-24.2567	-77.8231	39.5	-60.7547	-339.813
39.7	-24.942	-24.3746	-381.193		39.6	-21.7657	-73.4638	39.6	-65.4254	-337.01
39.8	-24.6306	-29.3567	-380.882		39.7	-23.0112	-72.8411	39.7	-64.8026	-335.142
39.9	-20.5827	-27.4884	-379.325		39.8	-23.634	-71.5955	39.8	-62.3116	-337.944
40	-15.6006	-26.2429	-374.966		39.9	-23.634	-70.9728	39.9	-59.8205	-335.142
40.1	-17.7802	-26.8657	-373.097		40	-23.0112	-69.1045	40	-59.5092	-340.747
40.2	-16.8461	-27.4884	-376.523		40.1	-21.1429	-69.7272	40.1	-59.5092	-342.304
40.3	-13.4209	-26.2429	-383.996		40.2	-24.8795	-66.6134	40.2	-59.5092	-346.663
40.4	-13.7323	-27.4884	-383.062		40.3	-25.5022	-70.9728	40.3	-57.9522	-340.124
40.5	-16.8461	-24.3746	-377.457		40.4	-23.634	-68.4817	40.4	-61.6888	-343.549
40.6	-13.4209	-24.3746	-378.391		40.5	-21.7657	-69.1045	40.5	-57.0181	-348.843
40.7	-16.8461	-25.6202	-373.409		40.6	-25.5022	-69.7272	40.6	-60.1319	-338.879
40.8	-14.355	-25.6202	-381.193		40.7	-27.3705	-70.9728	40.7	-59.1978	-334.519
40.9	-17.7802	-27.4884	-384.619		40.8	-24.8795	-67.859	40.8	-61.6888	-333.896
41	-16.8461	-24.9974	-379.014		40.9	-26.7478	-72.2183	40.9	-51.1019	-344.795
41.1	-21.5168	-26.8657	-385.864		41	-26.7478	-72.8411	41	-52.6588	-350.711
41.2	-18.0916	-26.2429	-392.092		41.1	-29.2388	-71.5955	41.1	-57.3295	-336.388
41.3	-11.864	-26.8657	-384.93		41.2	-24.2567	-73.4638	41.2	-54.8384	-338.256
41.4	-13.7323	-27.4884	-387.11		41.3	-27.3705	-75.3321	41.3	-56.7067	-340.124
41.5	-11.2412	-25.6202	-376.523		41.4	-28.616	-72.8411	41.4	-56.7067	-349.466
41.6	-12.1754	-29.3567	-369.672		41.5	-24.2567	-73.4638	41.5	-56.3953	-339.813
41.7	-17.1575	-28.734	-368.115		41.6	-29.8616	-76.5776	41.6	-57.3295	-334.208
41.8	-23.6965	-24.9974	-361.265		41.7	-30.4843	-74.0866	41.7	-60.1319	-338.256
41.9	-15.2892	-26.8657	-366.558		41.8	-30.4843	-75.3321	41.8	-62.0002	-342.304
42	-17.4688	-24.9974	-371.541		41.9	-27.3705	-74.0866	41.9	-59.8205	-341.992
42.1	-18.0916	-25.6202	-361.888		42	-24.8795	-71.5955	42	-57.3295	-343.861
42.2	-20.894	-24.3746	-365.624		42.1	-24.2567	-75.9549	42.1	-59.5092	-343.861
42.3	-17.1575	-25.6202	-371.229		42.2	-24.8795	-78.4459	42.2	-58.575	-331.094
42.4	-13.7323	-25.6202	-383.373		42.3	-24.8795	-74.0866	42.3	-58.8864	-329.226
42.5	-16.2233	-24.3746	-380.259		42.4	-25.5022	-75.9549	42.4	-61.3774	-341.992
42.6	-17.4688	-24.9974	-373.097		42.5	-27.3705	-69.7272	42.5	-63.2457	-340.435
42.7	-21.5168	-23.7519	-372.163		42.6	-26.7478	-67.859	42.6	-61.3774	-341.058
42.8	-20.5827	-24.3746	-366.87		42.7	-27.9933	-67.2362	42.7	-62.0002	-342.304
42.9	-19.9599	-23.7519	-369.672		42.8	-29.8616	-66.6134	42.8	-58.575	-336.076
43	-23.3851	-26.2429	-372.475		42.9	-27.3705	-64.7452	42.9	-57.6409	-341.681
43.1	-19.3371	-24.9974	-364.067		43	-27.9933	-60.3858	43	-52.6588	-348.843
43.2	-18.0916	-21.2608	-360.954		43.1	-26.7478	-59.1403	43.1	-53.5929	-345.106
43.3	-17.4688	-20.0153	-355.66		43.2	-27.9933	-59.1403	43.2	-57.0181	-340.435
43.4	-18.0916	-18.147	-353.169		43.3	-26.7478	-64.1224	43.3	-62.3116	-342.927
43.5	-18.403	-20.6381	-349.432		43.4	-25.5022	-62.8769	43.4	-54.8384	-340.747
43.6	-19.6485	-19.3925	-346.63		43.5	-25.5022	-66.6134	43.5	-58.575	-348.22
43.7	-19.0257	-16.2787	-344.139		43.6	-23.0112	-69.1045	43.6	-58.2636	-340.435
43.8	-9.99571	-20.6381	-352.235		43.7	-23.0112	-66.6134	43.7	-58.2636	-336.699
43.9	-13.4209	-20.6381	-344.139		43.8	-24.8795	-65.9907	43.8	-57.9522	-341.992
44	-17.4688	-24.9974	-342.894		43.9	-24.2567	-63.4996	43.9	-59.1978	-346.974
44.1	-16.8461	-19.3925	-345.696		44	-23.0112	-62.2541	44	-58.2636	-345.418
44.2	-18.0916	-18.147	-346.007		44.1	-24.8795	-65.3679	44.1	-57.3295	-349.154
44.3	-18.0916	-24.3746	-344.45		44.2	-21.7657	-65.3679	44.2	-53.9043	-346.663
44.4	-17.4688	-24.9974	-338.846		44.3	-26.7478	-65.9907	44.3	-57.0181	-350.088
44.5	-12.1754	-23.7519	-338.534		44.4	-25.5022	-67.2362	44.4	-62.9343	-351.022
44.6	-11.864	-23.1291	-331.061		44.5	-27.3705	-67.2362	44.5	-71.3416	-348.22
44.7	-7.50467	-23.7519	-330.75		44.6	-25.5022	-67.859	44.6	-68.5392	-348.22
44.8	-11.2412	-23.7519	-325.145		44.7	-23.0112	-69.1045	44.7	-62.623	-337.633
44.9	-15.9119	-23.7519	-318.606		44.8	-24.8795	-67.2362	44.8	-60.1319	-322.064
45	-15.6006	-26.8657	-312.378		44.9	-23.0112	-63.4996	44.9	-61.3774	-332.028
45.1	-18.0916	-23.7519	-322.031		45	-27.3705	-70.35	45	-64.4912	-342.927
45.2	-16.8461	-21.8836	-326.702		45.1	-29.8616	-67.859	45.1	-63.5571	-338.256
45.3	-18.7144	-24.9974	-330.75		45.2	-31.7299	-72.8411	45.2	-61.0661	-331.094
45.4	-18.7144	-22.5063	-327.325		45.3	-29.8616	-71.5955	45.3	-59.5092	-319.573
45.5	-14.9778	-21.8836	-337.6		45.4	-30.4843	-69.7272	45.4	-52.9702	-323.31
45.6	-13.7323	-26.8657	-334.175		45.5	-30.4843	-72.8411	45.5	-57.0181	-317.082
45.7	-13.1095	-28.1112	-333.863		45.6	-34.2209	-70.9728	45.6	-55.4612	-312.411
45.8	-12.7981	-23.7519	-329.193		45.7	-36.7119	-71.5955	45.7	-56.084	-320.819
45.9	-15.2892	-23.1291	-325.456		45.8	-34.2209	-71.5955	45.8	-54.8384	-327.046
46	-10.9299	-19.3925	-325.768		45.9	-33.5981	-70.9728	45.9	-59.5092	-326.735
46.1	-12.1754	-26.2429	-325.768		46	-29.2388	-70.9728	46	-62.623	-328.603
46.2	-11.864	-26.2429	-317.36		46.1	-32.3526	-71.5955	46.1	-65.114	-339.19
46.3	-17.4688	-25.6202	-316.426		46.2	-28.616	-71.5955	46.2	-61.0661	-341.058
46.4	-19.0257	-29.3567	-315.181		46.3	-31.7299	-73.4638	46.3	-58.8864	-335.765
46.5	-16.8461	-23.7519	-313.312		46.4	-27.9933	-70.35	46.4	-65.4254	-343.549
46.6	-16.8461	-26.8657	-316.426		46.5	-29.2388	-65.9907	46.5	-59.1978	-342.927
46.7	-17.7802	-28.1112	-316.115		46.6	-29.2388	-65.9907	46.6	-60.4433	-346.663
46.8	-13.1095	-24.9974	-315.803		46.7	-27.3705	-62.2541	46.7	-57.6409	-349.154
46.9	-19.0257	-26.2429	-308.019		46.8	-27.3705	-64.1224	46.8	-61.0661	-354.136
47	-17.7802	-26.8657	-305.839		46.9	-23.634	-62.2541	46.9	-52.3474	-347.909
47.1	-16.8461	-28.1112	-310.51		47	-26.7478	-61.6314	47	-49.2336	-346.04
47.2	-14.0437	-26.2429	-313.312		47.1	-24.2567	-62.8769	47.1	-47.6767	-341.681
47.3	-19.6485	-24.3746	-304.905		47.2	-24.8795	-62.2541	47.2	-49.8564	-344.172
47.4	-20.894	-23.1291	-311.133		47.3	-24.2567	-62.8769	47.3	-53.5929	-343.549
47.5	-19.0257	-25.6202	-317.983		47.4	-23.634	-57.8948	47.4	-54.8384	-337.633
47.6	-20.5827	-24.3746	-319.54		47.5	-23.0112	-54.1582	47.5	-54.8384	-347.909
47.7	-19.3371	-25.6202	-317.983		47.6	-23.0112	-55.4037	47.6	-53.9043	-356.627
47.8	-19.6485	-24.3746	-315.181		47.7	-24.2567	-59.1403	47.7	-50.7905	-352.268
47.9	-19.9599	-23.1291	-315.181		47.8	-21.7657	-61.6314	47.8	-47.9881	-335.453
48	-14.0437	-24.3746	-317.36		47.9	-20.5202	-63.4996	47.9	-52.9702	-336.388
48.1	-10.3071	-20.6381	-311.444		48	-18.6519	-62.2541	48	-54.5271	-348.22
48.2	-14.0437	-21.8836	-302.103		48.1	-24.8795	-62.8769	48.1	-51.1019	-356.939
48.3	-17.1575	-20.6381	-301.48		48.2	-22.3884	-64.1224	48.2	-56.084	-355.07
48.4	-10.6185	-23.7519	-306.151		48.3	-21.1429	-65.3679	48.3	-55.1498	-359.118
48.5	-9.68433	-21.8836	-303.348		48.4	-25.5022	-65.3679	48.4	-43.3174	-357.25
48.6	-10.9299	-24.3746	-304.905		48.5	-21.1429	-62.8769	48.5	-44.5629	-354.136
48.7	-9.68433	-22.5063	-306.462		48.6	-21.1429	-67.859	48.6	-48.6108	-346.663
48.8	-9.99571	-21.8836	-309.264		48.7	-19.8974	-67.2362	48.7	-46.4312	-349.777
48.9	-13.7323	-22.5063	-299.612		48.8	-21.7657	-66.6134	48.8	-47.6767	-357.561
49	-11.2412	-21.2608	-294.941		48.9	-21.7657	-69.7272	48.9	-52.3474	-353.513
49.1	-12.4868	-20.6381	-292.761		49	-21.1429	-65.3679	49	-42.6946	-356.005
49.2	-10.3071	-19.3925	-295.875		49.1	-23.0112	-63.4996	49.1	-43.6287	-348.22
49.3	-18.0916	-24.3746	-290.27		49.2	-21.1429	-64.1224	49.2	-48.6108	-343.238
49.4	-15.9119	-21.2608	-289.025		49.3	-17.4063	-69.7272	49.3	-50.4791	-338.879
49.5	-13.7323	-19.3925	-289.025		49.4	-20.5202	-69.1045	49.4	-49.8564	-337.01
49.6	-11.864	-21.8836	-288.091		49.5	-16.7836	-69.1045	49.5	-44.2515	-328.292
49.7	-13.4209	-19.3925	-298.055		49.6	-17.4063	-67.2362	49.6	-47.3653	-323.932
49.8	-10.9299	-20.6381	-297.121		49.7	-19.2746	-66.6134	49.7	-42.0718	-324.866
49.9	-15.6006	-23.1291	-289.647		49.8	-15.5381	-65.3679	49.8	-42.0718	-328.292
50	-17.1575	-21.2608	-288.713		49.9	-11.8015	-62.2541	49.9	-47.9881	-333.274
50.1	-11.864	-19.3925	-285.911		50	-15.5381	-62.2541	50	-41.7605	-339.813
50.2	-15.6006	-18.7698	-280.929		50.1	-18.6519	-61.6314	50.1	-42.0718	-344.172
50.3	-18.0916	-18.7698	-275.324		50.2	-15.5381	-59.7631	50.2	-43.006	-342.304
50.4	-16.2233	-21.8836	-274.39		50.3	-13.047	-56.6493	50.3	-45.497	-337.322
50.5	-14.0437	-18.147	-277.192		50.4	-13.6698	-57.272	50.4	-49.8564	-336.388
50.6	-17.4688	-15.656	-279.995		50.5	-15.5381	-56.0265	50.5	-52.3474	-332.962
50.7	-16.8461	-15.656	-276.569		50.6	-15.5381	-62.2541	50.6	-48.9222	-335.765
50.8	-13.4209	-15.0332	-276.258		50.7	-14.2925	-61.6314	50.7	-52.036	-336.076
50.9	-20.894	-15.0332	-277.192		50.8	-14.2925	-57.272	50.8	-44.2515	-338.256
51	-14.0437	-11.9194	-276.258		50.9	-13.6698	-54.781	50.9	-45.497	-338.256
51.1	-9.68433	-13.7877	-279.372		51	-13.6698	-52.9127	51	-47.3653	-336.076
51.2	-16.5347	-15.0332	-283.42		51.1	-14.9153	-52.2899	51.1	-46.1198	-325.801
51.3	-19.9599	-13.7877	-279.995		51.2	-14.2925	-53.5355	51.2	-42.3832	-327.357
51.4	-19.6485	-18.147	-280.929		51.3	-15.5381	-49.7989	51.3	-45.497	-331.717
51.5	-20.894	-15.0332	-284.977		51.4	-16.7836	-53.5355	51.4	-43.006	-330.16
51.6	-14.6664	-17.5243	-279.06		51.5	-14.2925	-53.5355	51.5	-45.497	-330.16
51.7	-15.6006	-17.5243	-271.899		51.6	-16.1608	-59.7631	51.6	-43.6287	-346.04
51.8	-19.6485	-14.4104	-272.521		51.7	-16.1608	-61.6314	51.7	-43.3174	-342.927
51.9	-16.5347	-13.1649	-273.456		51.8	-14.9153	-65.3679	51.8	-48.2995	-343.238
52	-14.0437	-14.4104	-273.767		51.9	-17.4063	-64.7452	51.9	-49.2336	-333.274
52.1	-14.9778	-17.5243	-274.39		52	-14.2925	-68.4817	52	-45.1856	-329.537
52.2	-18.7144	-16.2787	-271.899		52.1	-13.6698	-70.35	52.1	-46.4312	-342.304
52.3	-20.2713	-15.656	-264.426		52.2	-14.2925	-72.8411	52.2	-46.7425	-343.549
52.4	-18.403	-15.656	-260.066		52.3	-15.5381	-75.3321	52.3	-47.0539	-331.717
52.5	-16.8461	-15.656	-259.755		52.4	-15.5381	-77.2004	52.4	-42.0718	-331.717
52.6	-15.2892	-15.0332	-265.36		52.5	-16.7836	-75.3321	52.5	-39.5808	-340.435
52.7	-15.6006	-15.656	-266.917		52.6	-17.4063	-73.4638	52.6	-41.1377	-350.711
52.8	-12.1754	-18.147	-270.342		52.7	-13.6698	-74.7093	52.7	-40.2036	-356.005
52.9	-10.9299	-16.9015	-272.833		52.8	-14.2925	-71.5955	52.8	-41.4491	-359.118
53	-10.3071	-15.656	-270.03		52.9	-18.0291	-69.1045	52.9	-37.0898	-361.609
53.1	-11.2412	-18.147	-264.737		53	-15.5381	-71.5955	53	-34.5987	-356.005
53.2	-13.7323	-15.656	-271.899		53.1	-15.5381	-74.7093	53.1	-38.0239	-346.663
53.3	-17.1575	-16.2787	-267.851		53.2	-12.4243	-72.2183	53.2	-37.7125	-340.124
53.4	-18.403	-16.9015	-263.803		53.3	-13.047	-70.9728	53.3	-38.6467	-333.896
53.5	-14.9778	-16.9015	-260.066		53.4	-14.2925	-72.2183	53.4	-42.6946	-332.651
53.6	-14.9778	-15.656	-268.162		53.5	-17.4063	-74.0866	53.5	-40.5149	-331.405
53.7	-16.2233	-20.0153	-271.899		53.6	-14.9153	-74.7093	53.6	-37.0898	-330.783
53.8	-15.6006	-16.9015	-267.228		53.7	-15.5381	-72.2183	53.7	-39.2694	-332.962
53.9	-15.9119	-16.9015	-262.869		53.8	-15.5381	-73.4638	53.8	-40.8263	-332.962
54	-12.1754	-15.0332	-265.36		53.9	-13.047	-75.9549	53.9	-41.1377	-337.322
54.1	-12.1754	-16.9015	-275.013		54	-10.556	-73.4638	54	-36.1556	-331.405
54.2	-13.7323	-20.0153	-274.701		54.1	-11.8015	-72.8411	54.1	-39.5808	-333.896
54.3	-12.7981	-18.147	-277.815		54.2	-13.6698	-74.7093	54.2	-37.4011	-337.944
54.4	-12.7981	-18.147	-277.815		54.3	-15.5381	-72.8411	54.3	-34.5987	-327.357
54.5	-16.2233	-18.147	-280.929		54.4	-14.2925	-77.8231	54.4	-36.467	-322.687
54.6	-15.2892	-20.0153	-281.863		54.5	-14.2925	-75.3321	54.5	-34.5987	-325.489
54.7	-11.2412	-17.5243	-275.947		54.6	-11.1787	-75.9549	54.6	-36.1556	-330.471
54.8	-10.6185	-15.0332	-271.587		54.7	-11.8015	-74.7093	54.7	-42.6946	-334.519
54.9	-11.864	-18.7698	-274.701		54.8	-11.8015	-79.6914	54.8	-34.9101	-322.998
55	-13.7323	-15.0332	-279.06		54.9	-10.556	-81.5597	54.9	-37.4011	-334.831
55.1	-13.4209	-15.656	-280.929		55	-10.556	-77.8231	55	-42.0718	-337.01
55.2	-15.2892	-20.6381	-283.42		55.1	-11.1787	-79.6914	55.1	-44.5629	-337.944
55.3	-15.2892	-18.147	-271.276		55.2	-11.8015	-79.0687	55.2	-36.1556	-334.208
55.4	-9.37296	-20.0153	-268.162		55.3	-13.047	-77.8231	55.3	-33.6646	-326.423
55.5	-10.3071	-18.7698	-264.737		55.4	-14.9153	-76.5776	55.4	-37.0898	-334.519
55.6	-11.2412	-18.7698	-259.132		55.5	-14.2925	-74.0866	55.5	-41.4491	-329.537
55.7	-10.9299	-20.0153	-257.575		55.6	-13.6698	-75.3321	55.6	-38.3353	-328.914
55.8	-10.6185	-16.9015	-267.851		55.7	-14.9153	-75.9549	55.7	-36.1556	-327.669
55.9	-13.4209	-16.9015	-266.605		55.8	-13.047	-74.0866	55.8	-38.0239	-332.028
56	-10.6185	-20.0153	-261		55.9	-15.5381	-75.9549	55.9	-36.1556	-332.028
56.1	-7.81605	-19.3925	-256.952		56	-14.9153	-73.4638	56	-42.0718	-328.603
56.2	-7.19328	-17.5243	-254.461		56.1	-14.2925	-71.5955	56.1	-39.2694	-336.699
56.3	-10.3071	-20.0153	-266.294		56.2	-15.5381	-74.0866	56.2	-42.0718	-341.992
56.4	-13.7323	-19.3925	-255.707		56.3	-18.0291	-70.9728	56.3	-42.0718	-346.04
56.5	-8.75019	-18.7698	-251.97		56.4	-13.047	-71.5955	56.4	-42.6946	-350.711
56.6	-5.01363	-17.5243	-251.659		56.5	-13.6698	-70.9728	56.5	-47.0539	-347.597
56.7	-10.6185	-19.3925	-258.198		56.6	-14.2925	-70.9728	56.6	-48.6108	-348.843
56.8	-7.19328	-16.9015	-253.527		56.7	-12.4243	-70.35	56.7	-47.9881	-350.4
56.9	-7.81605	-18.147	-256.641		56.8	-13.047	-72.8411	56.8	-47.0539	-343.238
57	-8.43881	-20.0153	-251.97		56.9	-14.9153	-71.5955	56.9	-49.8564	-346.04
57.1	-5.63638	-17.5243	-245.743		57	-13.047	-66.6134	57	-52.9702	-345.418
57.2	-3.7681	-19.3925	-239.204		57.1	-9.31045	-67.2362	57.1	-51.4133	-335.142
57.3	-9.99571	-20.0153	-246.366		57.2	-9.93321	-72.2183	57.2	-54.5271	-330.16
57.4	-6.25914	-21.2608	-246.988		57.3	-8.68769	-70.35	57.3	-51.7246	-331.405
57.5	-5.01363	-18.147	-244.186		57.4	-12.4243	-71.5955	57.4	-53.2815	-329.849
57.6	-2.52258	-16.2787	-245.431		57.5	-12.4243	-70.9728	57.5	-46.4312	-336.076
57.7	-9.06157	-17.5243	-246.366		57.6	-7.44217	-73.4638	57.6	-46.7425	-338.256
57.8	-9.68433	-19.3925	-240.449		57.7	-9.93321	-72.8411	57.7	-50.7905	-343.238
57.9	-8.43881	-20.6381	-242.94		57.8	-13.6698	-73.4638	57.8	-48.9222	-342.304
58	-8.75019	-20.0153	-244.497		57.9	-10.556	-73.4638	57.9	-43.9401	-334.831
58.1	-12.1754	-23.1291	-247.611		58	-12.4243	-75.3321	58	-44.8743	-344.795
58.2	-10.9299	-23.7519	-252.282		58.1	-14.9153	-75.9549	58.1	-50.1677	-348.843
58.3	-12.4868	-19.3925	-249.479		58.2	-13.047	-74.7093	58.2	-46.1198	-346.974
58.4	-5.94776	-24.3746	-262.557		58.3	-12.4243	-74.0866	58.3	-46.7425	-352.268
58.5	-5.63638	-24.9974	-263.491		58.4	-14.2925	-75.3321	58.4	-41.4491	-348.22
58.6	-7.50467	-23.1291	-257.575		58.5	-13.047	-77.2004	58.5	-41.1377	-341.058
58.7	-7.50467	-19.3925	-257.264		58.6	-11.8015	-76.5776	58.6	-50.1677	-324.555
58.8	-10.3071	-14.4104	-255.084		58.7	-10.556	-73.4638	58.7	-47.0539	-322.687
58.9	-6.25914	-21.8836	-247.922		58.8	-11.1787	-73.4638	58.8	-48.2995	-311.788
59	-6.8819	-18.147	-251.659		58.9	-11.1787	-67.859	58.9	-54.5271	-320.196
59.1	-9.68433	-19.3925	-257.575		59	-13.047	-69.7272	59	-49.2336	-325.178
59.2	-5.325	-15.656	-254.15		59.1	-14.2925	-65.9907	59.1	-46.4312	-337.633
59.3	-5.01363	-12.5422	-248.234		59.2	-13.047	-67.859	59.2	-51.4133	-352.268
59.4	-7.19328	-16.2787	-256.952		59.3	-14.2925	-67.859	59.3	-43.6287	-352.268
59.5	-5.94776	-16.2787	-263.18		59.4	-19.2746	-66.6134	59.4	-43.006	-346.04
59.6	-6.57053	-19.3925	-261.623		59.5	-18.6519	-61.6314	59.5	-40.2036	-352.268
59.7	-4.07948	-18.147	-262.869		59.6	-16.1608	-61.0086	59.6	-39.2694	-349.154
59.8	-5.63638	-16.2787	-262.557		59.7	-15.5381	-61.6314	59.7	-46.4312	-340.124
59.9	-5.63638	-15.656	-250.725		59.8	-14.9153	-64.7452	59.8	-40.8263	-345.729
60	-1.89981	-14.4104	-253.216		59.9	-19.2746	-68.4817	59.9	-40.5149	-357.25
60.1	-1.89981	-16.9015	-252.905		60	-16.7836	-69.7272	60	-48.9222	-348.531
60.2	-4.70224	-18.147	-259.755		60.1	-15.5381	-65.9907	60.1	-51.7246	-340.124
60.3	-2.2112	-16.2787	-255.396		60.2	-18.0291	-67.2362	60.2	-46.4312	-338.879
60.4	0.279846	-15.656	-257.575		60.3	-16.7836	-67.859	60.3	-48.6108	-337.322
60.5	-0.654297	-16.9015	-262.869		60.4	-18.0291	-67.859	60.4	-45.8084	-332.651
60.6	-1.89981	-13.1649	-264.114		60.5	-18.0291	-69.7272	60.5	-49.2336	-330.783
60.7	-1.58844	-14.4104	-260.066		60.6	-19.8974	-69.7272	60.6	-47.0539	-327.357
60.8	-0.0315323	-16.2787	-248.234		60.7	-15.5381	-69.7272	60.7	-50.7905	-340.747
60.9	-7.50467	-13.7877	-245.431		60.8	-15.5381	-67.859	60.8	-55.1498	-336.388
61	-4.70224	-14.4104	-249.791		60.9	-18.0291	-65.3679	60.9	-56.3953	-337.944
61.1	-2.83395	-15.656	-234.222		61	-14.9153	-68.4817	61	-55.4612	-328.914
61.2	-1.27705	-13.7877	-232.665		61.1	-14.2925	-72.2183	61.1	-57.6409	-327.046
61.3	-0.0315323	-16.9015	-234.844		61.2	-13.047	-72.2183	61.2	-59.5092	-326.112
61.4	1.52538	-16.9015	-233.91		61.3	-13.6698	-72.2183	61.3	-52.9702	-322.687
61.5	-2.52258	-14.4104	-231.419		61.4	-17.4063	-72.2183	61.4	-46.7425	-327.357
61.6	-3.45672	-10.0511	-231.731		61.5	-17.4063	-72.8411	61.5	-58.2636	-333.896
61.7	-5.01363	-16.2787	-228.305		61.6	-18.6519	-73.4638	61.6	-60.4433	-329.849
61.8	-6.57053	-18.147	-225.503		61.7	-15.5381	-66.6134	61.7	-57.9522	-325.178
61.9	-1.27705	-14.4104	-232.042		61.8	-14.2925	-67.2362	61.8	-56.084	-315.836
62	1.83675	-16.9015	-227.06		61.9	-19.2746	-64.7452	61.9	-49.8564	-320.819
62.1	0.279846	-16.2787	-217.407		62	-18.0291	-65.3679	62	-49.545	-316.771
62.2	-5.94776	-11.9194	-215.539		62.1	-16.1608	-65.9907	62.1	-48.2995	-319.262
62.3	2.14813	-13.7877	-226.126		62.2	-13.6698	-66.6134	62.2	-44.2515	-322.687
62.4	0.902611	-15.0332	-228.305		62.3	-17.4063	-65.9907	62.3	-39.8922	-326.735
62.5	-1.58844	-13.1649	-230.174		62.4	-18.0291	-62.8769	62.4	-43.3174	-338.256
62.6	-0.342911	-10.6739	-232.042		62.5	-16.7836	-63.4996	62.5	-40.8263	-339.19
62.7	-0.965675	-15.656	-233.599		62.6	-14.9153	-64.7452	62.6	-41.7605	-339.813
62.8	-1.58844	-17.5243	-232.665		62.7	-14.9153	-67.2362	62.7	-44.5629	-342.927
62.9	-1.27705	-16.2787	-226.437		62.8	-16.7836	-63.4996	62.8	-43.3174	-336.699
63	-1.27705	-15.0332	-227.994		62.9	-18.6519	-63.4996	62.9	-45.497	-326.735
63.1	-2.83395	-15.0332	-225.814		63	-19.2746	-68.4817	63	-52.036	-334.208
63.2	-2.52258	-11.2966	-216.784		63.1	-19.8974	-66.6134	63.1	-47.9881	-326.735
63.3	-2.52258	-12.5422	-224.258		63.2	-19.2746	-64.1224	63.2	-42.3832	-326.112
63.4	0.591232	-14.4104	-219.587		63.3	-19.2746	-62.2541	63.3	-43.006	-330.471
63.5	-0.654297	-14.4104	-214.605		63.4	-21.7657	-64.1224	63.4	-41.4491	-319.262
63.6	-5.63638	-17.5243	-220.521		63.5	-17.4063	-67.2362	63.5	-39.5808	-308.052
63.7	-0.965675	-15.656	-219.587		63.6	-18.0291	-67.859	63.6	-42.0718	-307.741
63.8	-0.342911	-13.7877	-227.683		63.7	-18.0291	-66.6134	63.7	-42.0718	-318.327
63.9	0.279846	-15.0332	-226.437		63.8	-14.2925	-65.9907	63.8	-42.6946	-312.1
64	-6.57053	-15.0332	-221.766		63.9	-14.9153	-66.6134	63.9	-39.5808	-312.1
64.1	-0.342911	-14.4104	-214.916		64	-16.1608	-71.5955	64	-44.8743	-311.477
64.2	-2.52258	-18.7698	-220.21		64.1	-12.4243	-74.0866	64.1	-42.6946	-306.806
64.3	-4.70224	-14.4104	-227.371		64.2	-14.9153	-73.4638	64.2	-43.006	-311.788
64.4	-3.7681	-18.147	-227.371		64.3	-14.9153	-70.9728	64.3	-43.006	-323.31
64.5	-1.27705	-18.7698	-221.144		64.4	-11.8015	-67.2362	64.4	-46.1198	-318.016
64.6	-6.8819	-12.5422	-214.605		64.5	-8.06493	-65.3679	64.5	-44.5629	-314.28
64.7	-3.45672	-20.0153	-216.162		64.6	-12.4243	-61.6314	64.6	-45.1856	-325.489
64.8	-4.70224	-15.656	-222.701		64.7	-13.6698	-61.6314	64.7	-37.7125	-331.405
64.9	-0.965675	-10.6739	-224.569		64.8	-11.1787	-63.4996	64.8	-40.8263	-328.603
65	-2.2112	-11.9194	-224.569		64.9	-11.1787	-64.1224	64.9	-47.6767	-325.489
65.1	-1.89981	-13.1649	-226.126		65	-11.8015	-65.9907	65	-38.6467	-317.393
65.2	-3.45672	-14.4104	-215.85		65.1	-12.4243	-63.4996	65.1	-38.6467	-322.687
65.3	0.279846	-14.4104	-217.719		65.2	-9.93321	-64.7452	65.2	-42.6946	-326.735
65.4	0.279846	-12.5422	-221.455		65.3	-14.9153	-65.9907	65.3	-43.006	-324.866
65.5	-1.89981	-13.1649	-222.389		65.4	-13.6698	-67.2362	65.4	-42.6946	-323.932
65.6	-1.89981	-11.9194	-223.635		65.5	-10.556	-68.4817	65.5	-39.5808	-326.112
65.7	-5.63638	-10.6739	-220.521		65.6	-14.2925	-69.1045	65.6	-39.5808	-324.244
65.8	-0.0315323	-11.9194	-212.114		65.7	-13.6698	-70.9728	65.7	-40.8263	-324.866
65.9	-0.342911	-13.7877	-219.275		65.8	-13.047	-67.2362	65.8	-38.3353	-316.771
66	1.21399	-13.1649	-218.653		65.9	-16.7836	-67.859	65.9	-37.7125	-317.393
66.1	-0.965675	-10.0511	-213.671		66	-15.5381	-67.859	66	-40.8263	-318.016
66.2	-0.965675	-10.6739	-216.162		66.1	-14.9153	-69.7272	66.1	-42.6946	-321.441
66.3	-0.654297	-11.9194	-216.162		66.2	-13.047	-68.4817	66.2	-45.497	-322.998
66.4	-2.83395	-10.0511	-213.048		66.3	-17.4063	-67.859	66.3	-46.1198	-338.879
66.5	-2.2112	-15.0332	-211.491		66.4	-17.4063	-69.1045	66.4	-42.3832	-336.699
66.6	-7.19328	-13.1649	-219.275		66.5	-15.5381	-70.35	66.5	-40.8263	-337.944
66.7	-7.19328	-11.9194	-214.293		66.6	-16.7836	-68.4817	66.6	-46.4312	-346.352
66.8	-3.14534	-15.656	-210.245		66.7	-18.0291	-66.6134	66.7	-48.6108	-353.202
66.9	-4.07948	-8.8056	-215.85		66.8	-15.5381	-65.3679	66.8	-47.0539	-345.729
67	-4.07948	-10.6739	-214.605		66.9	-16.1608	-65.3679	66.9	-48.2995	-336.388
67.1	-2.52258	-12.5422	-208.688		67	-15.5381	-64.7452	67	-46.1198	-326.735
67.2	-3.7681	-11.2966	-205.886		67.1	-18.0291	-62.2541	67.1	-41.7605	-332.028
67.3	-5.63638	-8.8056	-214.916		67.2	-19.2746	-59.7631	67.2	-46.1198	-322.687
67.4	-9.99571	-11.9194	-226.126		67.3	-20.5202	-59.7631	67.3	-46.4312	-319.884
67.5	-5.325	-13.1649	-227.06		67.4	-19.2746	-59.1403	67.4	-48.2995	-321.13
67.6	-5.325	-11.9194	-228.617		67.5	-19.8974	-60.3858	67.5	-45.497	-322.687
67.7	-3.14534	-14.4104	-238.892		67.6	-21.7657	-58.5175	67.6	-43.3174	-322.375
67.8	-9.99571	-12.5422	-236.09		67.7	-19.8974	-56.6493	67.7	-44.8743	-315.214
67.9	-0.965675	-11.2966	-242.006		67.8	-21.1429	-55.4037	67.8	-43.006	-314.591
68	-3.7681	-10.6739	-249.791		67.9	-19.8974	-57.272	67.9	-41.4491	-310.543
68.1	-8.43881	-9.42836	-244.809		68	-17.4063	-59.1403	68	-36.7784	-297.776
68.2	-6.57053	-11.9194	-246.988		68.1	-18.0291	-56.6493	68.1	-40.5149	-292.794
68.3	-5.94776	-8.18284	-246.988		68.2	-18.6519	-61.6314	68.2	-37.0898	-303.07
68.4	-7.81605	-10.0511	-239.204		68.3	-19.2746	-61.6314	68.3	-38.3353	-301.513
68.5	-7.19328	-11.9194	-229.24		68.4	-19.8974	-62.2541	68.4	-44.8743	-295.908
68.6	-12.7981	-10.0511	-220.21		68.5	-20.5202	-65.3679	68.5	-34.9101	-298.088
68.7	-7.81605	-10.0511	-222.701		68.6	-23.0112	-62.8769	68.6	-36.1556	-293.417
68.8	-9.99571	-13.1649	-218.964		68.7	-23.0112	-62.2541	68.7	-35.8442	-292.483
68.9	-6.8819	-11.9194	-212.114		68.8	-23.634	-63.4996	68.8	-35.2215	-296.531
69	-8.43881	-12.5422	-211.491		68.9	-21.7657	-61.6314	68.9	-34.9101	-304.004
69.1	-8.75019	-13.1649	-217.719		69	-23.0112	-62.8769	69	-34.9101	-304.938
69.2	-11.2412	-10.0511	-214.605		69.1	-27.9933	-61.6314	69.1	-37.7125	-288.435
69.3	-8.75019	-13.1649	-218.341		69.2	-24.2567	-62.2541	69.2	-36.7784	-280.028
69.4	-10.6185	-11.2966	-222.701		69.3	-26.125	-62.2541	69.3	-37.0898	-286.878
69.5	-9.99571	-10.0511	-218.03		69.4	-24.8795	-57.8948	69.4	-35.5328	-289.369
69.6	-11.5526	-11.2966	-226.749		69.5	-24.8795	-57.8948	69.5	-35.8442	-290.615
69.7	-10.6185	-13.1649	-230.485		69.6	-21.7657	-60.3858	69.6	-40.8263	-289.058
69.8	-9.06157	-11.9194	-224.569		69.7	-23.0112	-59.7631	69.7	-40.5149	-292.483
69.9	-14.6664	-10.6739	-231.419		69.8	-21.1429	-60.3858	69.8	-38.6467	-295.908
70	-12.4868	-11.9194	-223.635		69.9	-20.5202	-61.0086	69.9	-39.2694	-302.447
70.1	-9.68433	-12.5422	-218.341		70	-21.1429	-56.6493	70	-37.7125	-301.513
70.2	-12.7981	-11.9194	-215.85		70.1	-21.7657	-52.9127	70.1	-32.1077	-299.956
70.3	-13.4209	-13.7877	-216.784		70.2	-24.2567	-51.6672	70.2	-29.6166	-301.513
70.4	-13.1095	-12.5422	-225.192		70.3	-23.0112	-54.781	70.3	-29.6166	-295.285
70.5	-14.6664	-14.4104	-231.108		70.4	-23.0112	-57.272	70.4	-28.9939	-294.351
70.6	-13.7323	-13.7877	-230.485		70.5	-21.1429	-57.8948	70.5	-35.2215	-310.543
70.7	-13.1095	-13.7877	-224.88		70.6	-21.7657	-57.272	70.6	-32.1077	-315.214
70.8	-13.1095	-13.1649	-219.898		70.7	-19.8974	-57.8948	70.7	-33.0418	-311.788
70.9	-13.4209	-15.0332	-220.21		70.8	-20.5202	-60.3858	70.8	-34.5987	-309.92
71	-13.4209	-15.0332	-226.437		70.9	-19.8974	-62.8769	70.9	-30.2394	-320.196
71.1	-8.75019	-16.2787	-228.305		71	-19.8974	-65.9907	71	-28.6825	-327.046
71.2	-8.12743	-13.7877	-224.88		71.1	-19.2746	-65.9907	71.1	-26.1914	-325.178
71.3	-14.6664	-16.9015	-232.353		71.2	-18.0291	-63.4996	71.2	-31.7963	-335.453
71.4	-12.7981	-14.4104	-232.042		71.3	-15.5381	-62.8769	71.3	-35.2215	-323.31
71.5	-13.7323	-14.4104	-229.551		71.4	-20.5202	-61.0086	71.4	-37.0898	-308.052
71.6	-13.4209	-15.0332	-235.156		71.5	-19.8974	-61.6314	71.5	-34.2873	-306.495
71.7	-12.4868	-10.6739	-223.323		71.6	-18.0291	-64.7452	71.6	-39.2694	-310.854
71.8	-11.864	-12.5422	-226.749		71.7	-15.5381	-64.7452	71.7	-30.2394	-318.639
71.9	-13.1095	-13.7877	-222.701		71.8	-19.2746	-64.7452	71.8	-27.1256	-323.31
72	-12.7981	-13.7877	-221.766		71.9	-20.5202	-64.1224	71.9	-30.2394	-322.998
72.1	-12.7981	-10.6739	-211.802		72	-21.1429	-66.6134	72	-35.2215	-322.375
72.2	-13.4209	-8.8056	-219.898		72.1	-21.1429	-69.1045	72.1	-27.1256	-326.112
72.3	-18.0916	-16.2787	-226.437		72.2	-19.8974	-63.4996	72.2	-21.8321	-321.13
72.4	-16.5347	-15.656	-221.455		72.3	-19.8974	-59.7631	72.3	-26.1914	-326.112
72.5	-16.8461	-15.656	-214.293		72.4	-17.4063	-59.1403	72.4	-27.7483	-323.31
72.6	-14.6664	-16.9015	-214.916		72.5	-17.4063	-57.272	72.5	-28.0597	-321.753
72.7	-12.1754	-18.147	-212.736		72.6	-19.2746	-57.8948	72.6	-24.0118	-321.753
72.8	-11.864	-16.2787	-216.162		72.7	-19.2746	-59.7631	72.7	-28.3711	-321.441
72.9	-17.1575	-15.656	-222.389		72.8	-18.0291	-59.1403	72.8	-26.1914	-320.196
73	-12.1754	-15.0332	-228.305		72.9	-18.6519	-59.1403	72.9	-27.1256	-321.13
73.1	-14.0437	-13.1649	-234.844		73	-17.4063	-61.6314	73	-28.6825	-320.196
73.2	-13.4209	-12.5422	-235.779		73.1	-15.5381	-59.7631	73.1	-23.7004	-319.262
73.3	-14.6664	-15.0332	-236.401		73.2	-12.4243	-57.8948	73.2	-22.7662	-324.244
73.4	-14.9778	-11.9194	-237.024		73.3	-14.2925	-59.1403	73.3	-19.6524	-320.507
73.5	-9.68433	-18.147	-228.617		73.4	-14.2925	-57.8948	73.4	-18.4069	-312.1
73.6	-14.355	-16.2787	-225.814		73.5	-12.4243	-57.8948	73.5	-22.1435	-309.297
73.7	-10.6185	-13.7877	-231.419		73.6	-10.556	-60.3858	73.6	-20.2752	-304.004
73.8	-5.94776	-13.1649	-237.958		73.7	-13.6698	-62.8769	73.7	-19.6524	-304.004
73.9	-11.5526	-12.5422	-237.024		73.8	-11.1787	-64.1224	73.8	-20.5866	-309.92
74	-11.864	-13.7877	-232.042		73.9	-10.556	-65.3679	73.9	-27.437	-301.513
74.1	-13.7323	-16.2787	-237.647		74	-11.8015	-65.9907	74	-27.1256	-297.465
74.2	-12.7981	-17.5243	-226.437		74.1	-9.93321	-63.4996	74.1	-25.5687	-312.411
74.3	-9.68433	-15.0332	-226.126		74.2	-10.556	-64.7452	74.2	-28.0597	-322.375
74.4	-11.5526	-18.147	-230.174		74.3	-11.8015	-65.3679	74.3	-25.5687	-324.555
74.5	-13.1095	-15.656	-225.814		74.4	-12.4243	-65.9907	74.4	-22.7662	-323.621
74.6	-9.99571	-19.3925	-217.096		74.5	-16.7836	-70.9728	74.5	-26.8142	-319.884
74.7	-8.43881	-21.2608	-214.916		74.6	-13.047	-70.35	74.6	-26.8142	-317.705
74.8	-10.3071	-19.3925	-220.521		74.7	-12.4243	-65.9907	74.7	-29.3052	-310.543
74.9	-9.06157	-18.147	-219.898		74.8	-14.9153	-69.7272	74.8	-29.928	-306.806
75	-13.1095	-21.2608	-217.096		74.9	-15.5381	-69.7272	74.9	-29.3052	-316.148
75.1	-14.9778	-18.147	-220.521		75	-14.2925	-70.9728	75	-29.928	-327.046
75.2	-11.864	-21.8836	-222.389		75.1	-12.4243	-71.5955	75.1	-25.2573	-322.375
75.3	-14.0437	-21.8836	-223.323		75.2	-13.047	-70.9728	75.2	-30.2394	-315.836
75.4	-13.1095	-16.2787	-210.245		75.3	-12.4243	-69.7272	75.3	-33.3532	-326.112
75.5	-12.4868	-18.7698	-205.575		75.4	-15.5381	-67.2362	75.4	-32.419	-333.896
75.6	-13.1095	-20.6381	-205.886		75.5	-12.4243	-67.2362	75.5	-33.0418	-331.405
75.7	-8.75019	-23.1291	-201.527		75.6	-11.8015	-66.6134	75.6	-31.7963	-326.735
75.8	-9.06157	-21.8836	-209.311		75.7	-11.1787	-62.2541	75.7	-30.5508	-328.292
75.9	-14.0437	-18.147	-203.084		75.8	-13.047	-66.6134	75.8	-36.1556	-336.699
76	-13.7323	-14.4104	-204.641		75.9	-10.556	-62.2541	75.9	-29.3052	-336.699
76.1	-10.6185	-16.9015	-211.491		76	-11.8015	-62.2541	76	-37.4011	-324.244
76.2	-7.19328	-17.5243	-212.425		76.1	-8.68769	-65.9907	76.1	-38.0239	-316.771
76.3	-11.2412	-18.7698	-211.802		76.2	-12.4243	-69.7272	76.2	-36.7784	-318.95
76.4	-8.43881	-16.2787	-208.688		76.3	-14.2925	-70.9728	76.3	-30.2394	-315.214
76.5	-7.50467	-17.5243	-209.623		76.4	-13.6698	-70.9728	76.4	-28.0597	-314.591
76.6	-9.37296	-15.0332	-209.623		76.5	-11.1787	-70.35	76.5	-30.8621	-318.95
76.7	-7.50467	-14.4104	-209.934		76.6	-12.4243	-69.7272	76.6	-32.7304	-310.854
76.8	-10.3071	-14.4104	-213.671		76.7	-16.7836	-66.6134	76.7	-27.1256	-318.016
76.9	-7.19328	-15.0332	-218.341		76.8	-13.047	-69.1045	76.8	-30.5508	-315.214
77	-10.3071	-13.7877	-218.964		76.9	-14.2925	-69.7272	76.9	-25.5687	-325.178
77.1	-8.12743	-15.656	-213.671		77	-12.4243	-65.3679	77	-27.1256	-315.214
77.2	-5.325	-10.6739	-208.066		77.1	-13.047	-64.7452	77.1	-28.3711	-313.968
77.3	-8.12743	-14.4104	-202.772		77.2	-13.047	-62.2541	77.2	-30.8621	-319.884
77.4	-10.3071	-15.0332	-199.036		77.3	-14.2925	-64.1224	77.3	-25.2573	-321.441
77.5	-8.75019	-12.5422	-194.365		77.4	-13.6698	-57.8948	77.4	-34.9101	-315.525
77.6	-8.43881	-9.42836	-197.479		77.5	-12.4243	-63.4996	77.5	-28.0597	-307.429
77.7	-5.94776	-10.6739	-195.299		77.6	-12.4243	-62.8769	77.6	-26.1914	-314.591
77.8	-6.25914	-12.5422	-184.712		77.7	-12.4243	-62.2541	77.7	-28.0597	-307.118
77.9	-8.12743	-13.1649	-187.826		77.8	-15.5381	-57.8948	77.8	-33.0418	-304.938
78	-11.5526	-13.1649	-183.155		77.9	-14.9153	-57.272	77.9	-36.7784	-310.854
78.1	-15.2892	-13.1649	-187.203		78	-11.8015	-59.1403	78	-30.8621	-317.393
78.2	-8.75019	-12.5422	-193.119		78.1	-13.047	-58.5175	78.1	-31.4849	-318.016
78.3	-9.06157	-12.5422	-190.317		78.2	-13.047	-56.0265	78.2	-33.0418	-313.034
78.4	-10.3071	-15.0332	-181.91		78.3	-12.4243	-55.4037	78.3	-33.3532	-311.788
78.5	-9.06157	-14.4104	-186.58		78.4	-15.5381	-56.0265	78.4	-31.7963	-313.345
78.6	-9.99571	-10.0511	-190.628		78.5	-13.047	-56.6493	78.5	-29.6166	-305.872
78.7	-10.9299	-14.4104	-196.856		78.6	-12.4243	-57.8948	78.6	-32.1077	-304.938
78.8	-5.325	-14.4104	-197.79		78.7	-13.6698	-61.6314	78.7	-31.4849	-304.004
78.9	-5.94776	-14.4104	-195.61		78.8	-13.047	-62.8769	78.8	-30.2394	-309.297
79	-5.63638	-13.1649	-195.299		78.9	-15.5381	-64.1224	78.9	-30.8621	-309.297
79.1	-8.43881	-13.7877	-199.658		79	-13.047	-64.1224	79	-33.0418	-306.806
79.2	-12.1754	-16.2787	-195.61		79.1	-13.6698	-61.0086	79.1	-34.2873	-308.675
79.3	-8.75019	-14.4104	-199.97		79.2	-12.4243	-61.6314	79.2	-28.3711	-307.118
79.4	-8.12743	-12.5422	-205.263		79.3	-14.9153	-61.6314	79.3	-32.1077	-305.872
79.5	-4.39086	-14.4104	-211.18		79.4	-19.2746	-60.3858	79.4	-28.6825	-307.118
79.6	-8.75019	-15.656	-214.605		79.5	-14.9153	-57.8948	79.5	-27.1256	-298.399
79.7	-9.68433	-13.7877	-210.868		79.6	-14.9153	-58.5175	79.6	-29.6166	-299.333
79.8	-10.3071	-12.5422	-211.802		79.7	-14.9153	-57.272	79.7	-33.6646	-306.806
79.9	-9.99571	-12.5422	-211.802		79.8	-14.9153	-52.9127	79.8	-29.6166	-308.052
80	-5.63638	-12.5422	-215.227		79.9	-18.0291	-51.6672	79.9	-25.2573	-307.118
80.1	-5.63638	-13.7877	-222.078		80	-16.7836	-53.5355	80	-29.928	-311.166
80.2	-13.4209	-17.5243	-223.323		80.1	-14.2925	-57.272	80.1	-37.4011	-318.639
80.3	-9.99571	-10.6739	-223.946		80.2	-15.5381	-59.7631	80.2	-33.6646	-321.441
80.4	-5.01363	-13.7877	-216.162		80.3	-14.9153	-56.6493	80.3	-30.2394	-328.603
80.5	-8.12743	-12.5422	-215.85		80.4	-14.9153	-57.272	80.4	-28.3711	-326.112
80.6	-5.94776	-12.5422	-213.359		80.5	-18.0291	-57.272	80.5	-32.1077	-329.849
80.7	-6.25914	-11.9194	-212.425		80.6	-12.4243	-63.4996	80.6	-28.6825	-323.932
80.8	-6.57053	-14.4104	-207.132		80.7	-14.2925	-60.3858	80.7	-29.6166	-316.148
80.9	-9.06157	-13.1649	-206.82		80.8	-16.7836	-58.5175	80.8	-27.437	-313.657
81	-10.9299	-12.5422	-210.868		80.9	-14.9153	-57.8948	80.9	-32.1077	-311.166
81.1	-9.99571	-12.5422	-214.293		81	-16.7836	-59.7631	81	-40.2036	-300.579
81.2	-14.6664	-13.7877	-213.048		81.1	-15.5381	-57.8948	81.1	-31.7963	-306.806
81.3	-7.50467	-16.9015	-214.916		81.2	-18.6519	-56.6493	81.2	-29.928	-308.363
81.4	-7.19328	-15.656	-214.605		81.3	-14.2925	-55.4037	81.3	-29.6166	-301.824
81.5	-9.68433	-15.0332	-210.245		81.4	-14.9153	-59.1403	81.4	-33.0418	-299.333
81.6	-7.50467	-15.656	-210.245		81.5	-15.5381	-62.2541	81.5	-31.7963	-299.956
81.7	-9.68433	-15.656	-206.197		81.6	-19.2746	-64.1224	81.6	-27.437	-297.154
81.8	-9.99571	-13.1649	-209		81.7	-17.4063	-65.3679	81.7	-30.2394	-294.04
81.9	-9.99571	-16.9015	-206.197		81.8	-15.5381	-66.6134	81.8	-25.5687	-288.435
82	-6.57053	-18.7698	-210.245		81.9	-14.2925	-65.9907	81.9	-31.1735	-292.794
82.1	-8.43881	-16.9015	-205.886		82	-13.6698	-67.2362	82	-29.928	-297.776
82.2	-6.8819	-21.2608	-202.772		82.1	-14.2925	-69.7272	82.1	-36.7784	-299.645
82.3	-6.57053	-18.7698	-204.329		82.2	-11.8015	-66.6134	82.2	-35.5328	-295.597
82.4	-5.63638	-17.5243	-199.97		82.3	-16.7836	-66.6134	82.3	-36.1556	-294.663
82.5	-6.57053	-17.5243	-201.838		82.4	-18.6519	-69.1045	82.4	-34.5987	-302.758
82.6	-2.83395	-17.5243	-200.593		82.5	-21.7657	-64.1224	82.5	-30.8621	-306.495
82.7	-4.07948	-20.6381	-203.706		82.6	-19.2746	-64.7452	82.6	-31.1735	-308.675
82.8	-3.45672	-23.1291	-206.82		82.7	-24.2567	-63.4996	82.7	-27.7483	-298.71
82.9	-7.50467	-18.7698	-196.545		82.8	-23.634	-62.8769	82.8	-32.7304	-303.07
83	-4.70224	-20.0153	-202.461		82.9	-20.5202	-63.4996	82.9	-33.0418	-305.872
83.1	-8.12743	-19.3925	-207.132		83	-19.8974	-59.7631	83	-30.5508	-308.363
83.2	-4.07948	-20.0153	-212.114		83.1	-20.5202	-59.1403	83.1	-30.2394	-314.28
83.3	-6.25914	-22.5063	-209.311		83.2	-24.8795	-60.3858	83.2	-26.5028	-314.902
83.4	-2.83395	-19.3925	-200.593		83.3	-24.2567	-61.0086	83.3	-27.1256	-318.639
83.5	-5.94776	-16.2787	-203.084		83.4	-26.7478	-62.8769	83.4	-25.8801	-311.477
83.6	-7.19328	-20.0153	-198.724		83.5	-24.2567	-64.7452	83.5	-29.6166	-305.561
83.7	-5.63638	-16.9015	-196.545		83.6	-23.634	-66.6134	83.6	-23.0776	-308.986
83.8	-6.8819	-16.2787	-191.874		83.7	-23.0112	-65.3679	83.7	-23.389	-309.297
83.9	-2.2112	-21.2608	-181.287		83.8	-22.3884	-65.3679	83.8	-27.1256	-307.429
84	-6.57053	-18.7698	-184.401		83.9	-22.3884	-64.7452	83.9	-25.8801	-318.016
84.1	-7.81605	-15.0332	-187.515		84	-20.5202	-64.7452	84	-24.0118	-320.819
84.2	-7.19328	-18.147	-185.335		84.1	-21.1429	-61.6314	84.1	-26.1914	-322.064
84.3	-6.57053	-16.2787	-188.76		84.2	-17.4063	-60.3858	84.2	-23.0776	-335.453
84.4	-3.7681	-17.5243	-185.958		84.3	-16.1608	-61.6314	84.3	-25.5687	-327.98
84.5	-1.58844	-18.7698	-189.694		84.4	-14.2925	-65.9907	84.4	-26.8142	-324.866
84.6	-4.70224	-19.3925	-187.203		84.5	-13.6698	-66.6134	84.5	-26.8142	-322.998
84.7	-2.2112	-15.656	-186.892		84.6	-15.5381	-66.6134	84.6	-28.0597	-326.735
84.8	-6.25914	-16.2787	-186.892		84.7	-14.9153	-63.4996	84.7	-27.1256	-332.028
84.9	-3.45672	-18.147	-182.844		84.8	-17.4063	-64.1224	84.8	-29.928	-319.573
85	-5.01363	-23.1291	-181.287		84.9	-13.047	-65.9907	84.9	-31.4849	-312.411
85.1	-4.07948	-20.0153	-180.976		85	-12.4243	-65.3679	85	-32.1077	-312.723
85.2	-2.2112	-19.3925	-177.55		85.1	-13.6698	-67.2362	85.1	-33.0418	-310.854
85.3	-6.57053	-18.147	-182.844		85.2	-14.2925	-67.2362	85.2	-27.7483	-307.429
85.4	-2.83395	-15.656	-182.844		85.3	-14.2925	-69.7272	85.3	-27.437	-305.872
85.5	-0.342911	-12.5422	-178.796		85.4	-16.7836	-71.5955	85.4	-26.1914	-308.052
85.6	-3.7681	-15.656	-182.533		85.5	-13.6698	-74.7093	85.5	-28.3711	-313.657
85.7	-2.83395	-18.147	-178.173		85.6	-14.9153	-74.0866	85.6	-24.9459	-311.477
85.8	-0.0315323	-18.147	-177.239		85.7	-11.1787	-73.4638	85.7	-17.7841	-316.459
85.9	-3.7681	-15.0332	-180.041		85.8	-12.4243	-74.7093	85.8	-18.4069	-317.082
86	-0.965675	-18.147	-181.287		85.9	-11.1787	-76.5776	85.9	-24.3231	-312.411
86.1	-3.14534	-21.8836	-176.616		86	-10.556	-75.3321	86	-20.5866	-312.1
86.2	-2.52258	-18.7698	-179.73		86.1	-7.44217	-73.4638	86.1	-23.7004	-305.249
86.3	-4.07948	-20.0153	-183.155		86.2	-10.556	-72.8411	86.2	-23.0776	-293.417
86.4	-5.01363	-18.7698	-187.203		86.3	-10.556	-70.9728	86.3	-25.5687	-289.058
86.5	-8.12743	-20.6381	-183.155		86.4	-9.31045	-73.4638	86.4	-26.5028	-291.86
86.6	-7.19328	-19.3925	-180.976		86.5	-13.6698	-71.5955	86.5	-21.2093	-301.513
86.7	-6.25914	-18.147	-180.353		86.6	-13.047	-70.9728	86.6	-23.7004	-310.232
86.8	-8.75019	-17.5243	-176.305		86.7	-9.93321	-67.859	86.7	-31.7963	-306.184
86.9	-8.12743	-18.147	-178.796		86.8	-13.6698	-67.2362	86.8	-30.8621	-298.71
87	-5.01363	-18.7698	-178.796		86.9	-13.6698	-65.3679	86.9	-33.3532	-293.728
87.1	-4.07948	-16.2787	-177.239		87	-11.1787	-64.1224	87	-32.419	-294.974
87.2	-1.58844	-16.9015	-176.928		87.1	-9.31045	-62.8769	87.1	-34.9101	-295.285
87.3	-6.8819	-15.656	-179.419		87.2	-8.06493	-61.6314	87.2	-39.5808	-291.237
87.4	-9.06157	-15.0332	-175.059		87.3	-11.1787	-61.0086	87.3	-32.7304	-290.926
87.5	-6.8819	-18.7698	-183.155		87.4	-9.31045	-61.6314	87.4	-31.1735	-296.842
87.6	-7.50467	-16.2787	-187.203		87.5	-10.556	-62.8769	87.5	-38.3353	-288.746
87.7	-6.57053	-19.3925	-188.137		87.6	-9.93321	-64.1224	87.6	-35.5328	-288.746
87.8	-5.01363	-18.147	-181.91		87.7	-9.31045	-61.0086	87.7	-29.6166	-286.878
87.9	-2.2112	-17.5243	-181.91		87.8	-8.68769	-57.8948	87.8	-31.4849	-281.585
88	-5.01363	-15.0332	-183.778		87.9	-8.06493	-55.4037	87.9	-25.5687	-281.273
88.1	-4.70224	-16.9015	-177.239		88	-9.93321	-55.4037	88	-20.2752	-286.255
88.2	-8.43881	-16.9015	-183.467		88.1	-9.31045	-60.3858	88.1	-24.3231	-278.471
88.3	-9.06157	-18.7698	-180.353		88.2	-9.31045	-61.0086	88.2	-23.7004	-280.65
88.4	-8.12743	-16.9015	-184.712		88.3	-9.31045	-59.1403	88.3	-25.8801	-289.058
88.5	-7.50467	-17.5243	-186.269		88.4	-9.31045	-59.1403	88.4	-23.0776	-296.531
88.6	-11.5526	-21.8836	-180.353		88.5	-7.44217	-59.7631	88.5	-22.1435	-298.71
88.7	-7.50467	-17.5243	-178.173		88.6	-7.44217	-61.6314	88.6	-22.1435	-300.89
88.8	-5.94776	-18.147	-175.059		88.7	-9.31045	-62.2541	88.7	-25.2573	-301.513
88.9	-7.81605	-20.6381	-175.059		88.8	-8.06493	-61.0086	88.8	-23.7004	-303.381
89	-9.06157	-16.9015	-171.323		88.9	-6.8194	-60.3858	88.9	-20.898	-308.675
89.1	-7.81605	-16.9015	-175.371		89	-4.32836	-58.5175	89	-23.7004	-299.956
89.2	-9.68433	-10.0511	-173.814		89.1	-7.44217	-57.8948	89.1	-21.8321	-303.07
89.3	-8.43881	-14.4104	-175.682		89.2	-8.68769	-56.0265	89.2	-18.0955	-310.232
89.4	-9.99571	-17.5243	-183.778		89.3	-9.31045	-57.272	89.3	-19.0297	-300.267
89.5	-12.7981	-13.1649	-180.664		89.4	-10.556	-57.272	89.4	-16.2272	-295.597
89.6	-11.5526	-15.656	-181.91		89.5	-8.06493	-59.7631	89.5	-19.6524	-297.776
89.7	-7.19328	-16.9015	-185.958		89.6	-7.44217	-62.2541	89.6	-20.5866	-300.579
89.8	-14.9778	-16.2787	-187.826		89.7	-6.8194	-60.3858	89.7	-26.1914	-293.728
89.9	-11.2412	-15.0332	-180.976		89.8	-8.68769	-61.0086	89.8	-26.8142	-294.351
90	-12.4868	-14.4104	-183.467		89.9	-8.06493	-62.8769	89.9	-21.2093	-295.285
90.1	-8.75019	-15.656	-184.089		90	-9.31045	-63.4996	90	-27.7483	-298.088
90.2	-11.2412	-16.2787	-183.155		90.1	-6.8194	-65.3679	90.1	-25.8801	-303.07
90.3	-9.99571	-16.9015	-173.191		90.2	-5.57388	-67.859	90.2	-24.9459	-303.693
90.4	-14.9778	-18.7698	-169.455		90.3	-9.93321	-67.2362	90.3	-27.437	-295.285
90.5	-11.2412	-18.147	-174.748		90.4	-8.68769	-64.7452	90.4	-26.5028	-290.303
90.6	-10.6185	-18.7698	-175.371		90.5	-8.06493	-64.7452	90.5	-23.7004	-286.567
90.7	-10.6185	-15.0332	-175.682		90.6	-10.556	-65.9907	90.6	-23.389	-287.812
90.8	-14.9778	-14.4104	-174.748		90.7	-9.93321	-62.8769	90.7	-24.0118	-294.974
90.9	-10.6185	-20.0153	-168.209		90.8	-9.31045	-61.6314	90.8	-28.6825	-291.549
91	-8.75019	-16.9015	-167.586		90.9	-7.44217	-62.2541	90.9	-24.3231	-288.746
91.1	-5.325	-20.0153	-161.359		91	-11.1787	-61.0086	91	-29.928	-285.944
91.2	-1.89981	-20.0153	-152.64		91.1	-9.31045	-57.8948	91.1	-17.7841	-287.501
91.3	-9.06157	-23.1291	-154.508		91.2	-9.93321	-57.272	91.2	-20.898	-286.255
91.4	-13.4209	-23.7519	-166.029		91.3	-11.8015	-55.4037	91.3	-24.9459	-281.273
91.5	-10.9299	-17.5243	-159.802		91.4	-11.1787	-56.0265	91.4	-21.5207	-283.453
91.6	-10.6185	-18.7698	-158.868		91.5	-13.047	-55.4037	91.5	-22.1435	-280.65
91.7	-10.9299	-16.2787	-162.604		91.6	-11.1787	-57.8948	91.6	-22.1435	-273.8
91.8	-13.1095	-20.0153	-158.245		91.7	-11.1787	-57.8948	91.7	-20.2752	-273.177
91.9	-9.99571	-18.147	-156.999		91.8	-11.1787	-54.781	91.8	-18.4069	-278.782
92	-12.1754	-16.2787	-157.311		91.9	-9.93321	-57.8948	91.9	-23.7004	-280.028
92.1	-10.9299	-19.3925	-152.64		92	-9.93321	-59.1403	92	-23.0776	-281.273
92.2	-9.68433	-17.5243	-157.311		92.1	-7.44217	-62.2541	92.1	-21.5207	-279.405
92.3	-14.6664	-18.147	-156.377		92.2	-7.44217	-62.2541	92.2	-26.5028	-284.387
92.4	-13.1095	-17.5243	-152.64		92.3	-9.93321	-67.2362	92.3	-25.8801	-282.207
92.5	-10.6185	-18.7698	-153.885		92.4	-5.57388	-61.0086	92.4	-31.7963	-278.159
92.6	-11.5526	-18.147	-154.197		92.5	-5.57388	-59.1403	92.5	-28.6825	-278.159
92.7	-7.81605	-17.5243	-156.999		92.6	-9.31045	-59.7631	92.6	-29.6166	-273.177
92.8	-8.75019	-14.4104	-154.508		92.7	-8.06493	-57.272	92.7	-26.5028	-276.914
92.9	-11.2412	-16.2787	-153.885		92.8	-9.31045	-57.8948	92.8	-22.7662	-271.62
93	-9.06157	-15.0332	-156.065		92.9	-10.556	-59.7631	92.9	-28.6825	-266.638
93.1	-8.12743	-11.2966	-152.64		93	-9.31045	-57.272	93	-36.1556	-271.309
93.2	-12.1754	-13.1649	-161.359		93.1	-11.1787	-61.0086	93.1	-30.2394	-279.094
93.3	-9.99571	-13.7877	-161.047		93.2	-8.68769	-64.7452	93.2	-29.6166	-280.028
93.4	-11.5526	-13.1649	-156.065		93.3	-7.44217	-63.4996	93.3	-27.437	-267.884
93.5	-6.57053	-13.7877	-155.442		93.4	-7.44217	-64.7452	93.4	-27.7483	-272.243
93.6	-11.5526	-10.6739	-158.245		93.5	-7.44217	-70.35	93.5	-28.6825	-272.866
93.7	-10.9299	-13.7877	-152.64		93.6	-4.95112	-67.2362	93.6	-28.3711	-273.8
93.8	-12.7981	-15.0332	-152.951		93.7	-8.68769	-65.9907	93.7	-21.5207	-287.501
93.9	-7.81605	-13.1649	-158.245		93.8	-6.19664	-68.4817	93.8	-28.0597	-296.531
94	-10.3071	-12.5422	-158.868		93.9	-8.06493	-67.859	93.9	-23.0776	-306.495
94.1	-10.3071	-13.1649	-158.245		94	-6.8194	-67.2362	94	-22.4549	-312.411
94.2	-10.3071	-18.147	-157.622		94.1	-6.19664	-65.3679	94.1	-26.8142	-308.363
94.3	-8.75019	-15.656	-161.047		94.2	-4.95112	-66.6134	94.2	-26.5028	-301.513
94.4	-9.99571	-15.656	-159.49		94.3	-9.93321	-69.1045	94.3	-20.898	-292.483
94.5	-9.99571	-13.1649	-160.113		94.4	-8.06493	-70.35	94.4	-20.5866	-292.794
94.6	-10.6185	-18.7698	-157.933		94.5	-5.57388	-70.35	94.5	-15.2931	-293.417
94.7	-9.06157	-16.2787	-159.49		94.6	-4.95112	-70.35	94.6	-25.5687	-303.693
94.8	-13.4209	-12.5422	-155.754		94.7	-4.95112	-67.2362	94.7	-25.2573	-308.052
94.9	-10.6185	-15.0332	-158.868		94.8	-5.57388	-67.2362	94.8	-22.1435	-301.824
95	-10.9299	-10.0511	-156.065		94.9	-4.95112	-66.6134	94.9	-24.3231	-303.693
95.1	-11.5526	-9.42836	-161.359		95	-6.19664	-64.1224	95	-23.389	-298.399
95.2	-5.94776	-11.9194	-161.359		95.1	-7.44217	-66.6134	95.1	-29.3052	-288.435
95.3	-7.81605	-11.9194	-159.802		95.2	-5.57388	-64.7452	95.2	-27.7483	-281.585
95.4	-7.81605	-14.4104	-156.999		95.3	-5.57388	-64.1224	95.3	-20.5866	-278.159
95.5	-12.4868	-16.2787	-155.442		95.4	-7.44217	-65.3679	95.4	-19.9638	-274.423
95.6	-5.63638	-16.9015	-160.736		95.5	-4.95112	-62.2541	95.5	-27.7483	-281.896
95.7	-6.8819	-13.7877	-161.047		95.6	-5.57388	-59.1403	95.6	-23.7004	-275.98
95.8	-8.75019	-7.56008	-159.49		95.7	-4.32836	-59.1403	95.7	-18.0955	-284.387
95.9	-5.94776	-8.8056	-155.754		95.8	-6.19664	-59.1403	95.8	-19.6524	-292.794
96	-8.12743	-12.5422	-161.981		95.9	-4.32836	-62.2541	95.9	-22.7662	-283.453
96.1	-10.6185	-10.6739	-158.868		96	-3.7056	-65.3679	96	-26.8142	-269.441
96.2	-7.50467	-7.56008	-155.754		96.1	-5.57388	-65.3679	96.1	-24.3231	-272.555
96.3	-4.07948	-10.6739	-154.508		96.2	-5.57388	-65.3679	96.2	-23.7004	-282.207
96.4	-8.12743	-9.42836	-151.706		96.3	-6.19664	-64.7452	96.3	-26.5028	-280.028
96.5	-9.06157	-9.42836	-152.64		96.4	-7.44217	-62.8769	96.4	-20.2752	-285.944
96.6	-6.57053	-12.5422	-159.49		96.5	-8.68769	-62.8769	96.5	-22.4549	-266.016
96.7	-6.57053	-10.6739	-157.622		96.6	-5.57388	-60.3858	96.6	-21.8321	-269.752
96.8	-8.12743	-11.9194	-157.311		96.7	-6.19664	-59.7631	96.7	-20.2752	-270.375
96.9	-6.8819	-9.42836	-160.736		96.8	-5.57388	-63.4996	96.8	-23.7004	-263.524
97	-4.07948	-11.9194	-156.377		96.9	-3.7056	-64.1224	96.9	-28.6825	-265.393
97.1	-8.12743	-8.8056	-148.592		97	-3.7056	-59.7631	97	-33.3532	-261.656
97.2	-5.94776	-10.6739	-142.364		97.1	-4.32836	-57.8948	97.1	-25.8801	-262.59
97.3	-4.39086	-11.9194	-147.969		97.2	-5.57388	-55.4037	97.2	-23.389	-258.854
97.4	-6.25914	-8.8056	-149.838		97.3	-5.57388	-57.272	97.3	-27.1256	-266.95
97.5	-5.01363	-8.18284	-147.346		97.4	-6.8194	-55.4037	97.4	-32.419	-269.441
97.6	-5.94776	-8.18284	-147.035		97.5	-7.44217	-57.272	97.5	-32.419	-264.459
97.7	-4.07948	-7.56008	-151.394		97.6	-4.95112	-57.272	97.6	-28.3711	-268.195
97.8	-5.63638	-9.42836	-140.496		97.7	-8.06493	-55.4037	97.7	-27.1256	-273.177
97.9	-1.58844	-7.56008	-135.514		97.8	-8.06493	-54.1582	97.8	-26.1914	-277.848
98	-5.325	-9.42836	-132.4		97.9	-7.44217	-53.5355	97.9	-24.3231	-277.537
98.1	-5.94776	-9.42836	-136.448		98	-7.44217	-51.6672	98	-24.6345	-283.764
98.2	-5.94776	-6.93731	-139.562		98.1	-9.31045	-52.2899	98.1	-21.8321	-277.225
98.3	-2.83395	-5.69179	-141.119		98.2	-9.93321	-51.6672	98.2	-24.3231	-281.585
98.4	-3.7681	-10.6739	-138.316		98.3	-9.31045	-49.7989	98.3	-21.5207	-289.992
98.5	-5.01363	-10.6739	-136.76		98.4	-9.31045	-46.0623	98.4	-21.5207	-289.369
98.6	-1.27705	-7.56008	-142.053		98.5	-9.31045	-44.8168	98.5	-24.9459	-288.124
98.7	-3.14534	-12.5422	-143.61		98.6	-4.32836	-46.0623	98.6	-25.8801	-295.597
98.8	-1.58844	-14.4104	-156.065		98.7	-8.06493	-47.3078	98.7	-25.8801	-288.435
98.9	-1.58844	-13.1649	-152.329		98.8	-7.44217	-46.6851	98.8	-26.5028	-287.812
99	-3.45672	-13.1649	-147.969		98.9	-9.31045	-45.4396	98.9	-25.2573	-284.698
99.1	-1.58844	-11.9194	-150.46		99	-9.93321	-48.5534	99	-27.437	-278.159
99.2	-3.45672	-10.0511	-143.921		99.1	-8.06493	-48.5534	99.1	-25.5687	-276.914
99.3	-3.7681	-12.5422	-145.79		99.2	-9.93321	-49.1761	99.2	-28.9939	-284.387
99.4	-5.325	-12.5422	-145.79		99.3	-11.1787	-49.1761	99.3	-27.437	-296.219
99.5	-4.07948	-12.5422	-140.807		99.4	-10.556	-51.0444	99.4	-24.6345	-299.333
99.6	2.77089	-10.6739	-138.005		99.5	-11.8015	-51.6672	99.5	-23.7004	-296.842
99.7	-1.89981	-15.0332	-142.053		99.6	-10.556	-56.0265	99.6	-19.3411	-286.255
99.8	-4.39086	-16.9015	-148.592		99.7	-8.68769	-51.0444	99.7	-23.389	-298.088
99.9	-6.25914	-13.1649	-140.807		99.8	-8.68769	-54.781	99.8	-17.7841	-296.842
100	-0.654297	-11.2966	-139.251		99.9	-8.06493	-58.5175	99.9	-19.3411	-297.776
100.1	0.591232	-9.42836	-146.412		100	-12.4243	-59.7631	100	-21.2093	-289.992
100.2	-0.0315323	-14.4104	-142.987		100.1	-9.31045	-56.6493	100.1	-22.1435	-292.794
100.3	0.279846	-13.7877	-147.969		100.2	-10.556	-57.272	100.2	-20.2752	-294.04
100.4	2.14813	-13.1649	-140.807		100.3	-11.1787	-59.1403	100.3	-22.7662	-289.369
100.5	3.70503	-11.9194	-139.873		100.4	-11.1787	-60.3858	100.4	-21.5207	-295.597
100.6	-0.965675	-10.6739	-139.251		100.5	-13.047	-60.3858	100.5	-23.0776	-292.171
100.7	1.52538	-13.1649	-132.4		100.6	-11.8015	-58.5175	100.6	-23.389	-288.124
100.8	3.70503	-12.5422	-134.891		100.7	-11.1787	-57.272	100.7	-30.2394	-286.878
100.9	4.01642	-14.4104	-139.873		100.8	-11.8015	-59.1403	100.8	-29.6166	-283.453
101	-3.7681	-11.9194	-136.448		100.9	-11.8015	-60.3858	100.9	-21.8321	-292.483
101.1	-5.01363	-11.9194	-136.137		101	-12.4243	-56.0265	101	-22.7662	-294.663
101.2	-2.83395	-13.7877	-144.233		101.1	-13.047	-54.1582	101.1	-22.7662	-297.465
101.3	-2.83395	-12.5422	-139.562		101.2	-13.6698	-52.9127	101.2	-20.5866	-307.118
101.4	-3.45672	-12.5422	-140.807		101.3	-13.6698	-52.2899	101.3	-17.7841	-313.657
101.5	-1.27705	-14.4104	-153.574		101.4	-16.7836	-52.2899	101.4	-17.1614	-312.411
101.6	-0.654297	-14.4104	-144.855		101.5	-16.7836	-54.1582	101.5	-20.898	-316.771
101.7	-0.0315323	-16.2787	-142.053		101.6	-12.4243	-55.4037	101.6	-16.2272	-316.771
101.8	-0.342911	-15.0332	-143.921		101.7	-13.047	-54.781	101.7	-17.4728	-317.082
101.9	-0.965675	-17.5243	-139.873		101.8	-8.68769	-51.0444	101.8	-15.6045	-306.806
102	-1.27705	-13.7877	-141.43		101.9	-9.93321	-51.0444	101.9	-9.99963	-305.249
102.1	-0.965675	-13.7877	-147.035		102	-9.31045	-51.6672	102	-14.6703	-302.136
102.2	-0.654297	-14.4104	-137.071		102.1	-10.556	-52.2899	102.1	-13.7362	-296.842
102.3	-0.342911	-15.656	-140.807		102.2	-8.68769	-51.6672	102.2	-14.359	-287.501
102.4	-2.83395	-10.0511	-135.514		102.3	-12.4243	-52.2899	102.3	-11.2452	-300.579
102.5	0.902611	-16.9015	-138.628		102.4	-11.1787	-52.2899	102.4	-15.9159	-298.399
102.6	2.14813	-16.2787	-145.167		102.5	-11.8015	-52.2899	102.5	-14.6703	-293.106
102.7	2.14813	-10.6739	-144.233		102.6	-10.556	-52.2899	102.6	-15.6045	-286.255
102.8	1.83675	-9.42836	-143.61		102.7	-13.047	-52.2899	102.7	-19.9638	-293.728
102.9	-3.45672	-11.2966	-141.742		102.8	-13.6698	-51.6672	102.8	-14.0476	-296.531
103	-0.342911	-12.5422	-141.119		102.9	-13.6698	-52.9127	102.9	-18.0955	-291.549
103.1	-0.654297	-13.1649	-137.071		103	-14.9153	-47.9306	103	-19.9638	-284.076
103.2	-0.0315323	-13.7877	-142.676		103.1	-10.556	-49.1761	103.1	-13.7362	-281.585
103.3	-1.89981	-11.9194	-144.544		103.2	-10.556	-46.0623	103.2	-19.9638	-289.058
103.4	2.45952	-13.1649	-143.299		103.3	-14.2925	-47.3078	103.3	-16.5386	-290.615
103.5	-0.0315323	-12.5422	-143.299		103.4	-13.047	-46.6851	103.4	-13.7362	-289.369
103.6	-1.58844	-9.42836	-144.544		103.5	-12.4243	-45.4396	103.5	-14.359	-291.549
103.7	-0.965675	-12.5422	-148.903		103.6	-13.047	-44.8168	103.6	-16.5386	-301.824
103.8	-0.654297	-11.2966	-153.574		103.7	-13.047	-47.3078	103.7	-14.359	-307.741
103.9	-0.965675	-8.8056	-154.82		103.8	-13.047	-47.9306	103.8	-17.1614	-303.07
104	-0.965675	-10.0511	-150.46		103.9	-15.5381	-50.4216	103.9	-9.68826	-300.579
104.1	0.902611	-11.2966	-147.658		104	-11.8015	-51.6672	104	-12.4907	-300.267
104.2	2.45952	-10.0511	-152.329		104.1	-12.4243	-53.5355	104.1	-8.44273	-304.004
104.3	-3.7681	-10.0511	-154.508		104.2	-12.4243	-52.9127	104.2	-9.68826	-301.202
104.4	-5.63638	-10.0511	-158.245		104.3	-13.047	-54.781	104.3	-10.6224	-301.202
104.5	0.591232	-10.0511	-161.359		104.4	-10.556	-59.1403	104.4	-11.5565	-294.974
104.6	3.08228	-11.2966	-158.868		104.5	-10.556	-57.272	104.5	-8.75411	-289.369
104.7	-2.83395	-13.1649	-165.718		104.6	-12.4243	-54.781	104.6	-13.7362	-291.237
104.8	-2.2112	-10.6739	-166.963		104.7	-11.1787	-55.4037	104.7	-15.2931	-287.501
104.9	-3.14534	-11.9194	-160.424		104.8	-9.93321	-60.3858	104.8	-14.9817	-297.776
105	0.591232	-8.8056	-156.999		104.9	-9.31045	-61.6314	104.9	-12.1793	-304.004
105.1	-3.14534	-7.56008	-164.472		105	-8.68769	-61.0086	105	-9.99963	-297.154
105.2	-7.19328	-8.18284	-163.227		105.1	-6.19664	-61.6314	105.1	-7.19721	-296.842
105.3	0.902611	-8.8056	-156.065		105.2	-8.68769	-60.3858	105.2	-9.68826	-290.303
105.4	0.902611	-6.93731	-159.179		105.3	-7.44217	-58.5175	105.3	-6.26307	-283.453
105.5	2.14813	-7.56008	-161.67		105.4	-6.8194	-57.8948	105.4	-14.6703	-274.111
105.6	-1.89981	-5.69179	-160.736		105.5	-8.06493	-57.272	105.5	-13.4248	-276.602
105.7	-1.27705	-8.8056	-153.885		105.6	-8.06493	-57.272	105.6	-4.70616	-285.944
105.8	-1.27705	-9.42836	-154.82		105.7	-9.31045	-56.6493	105.7	-14.6703	-288.746
105.9	-0.342911	-10.0511	-157.311		105.8	-9.93321	-57.8948	105.8	-12.1793	-286.567
106	5.26194	-10.6739	-156.065		105.9	-8.06493	-55.4037	105.9	-10.9338	-280.962
106.1	-0.342911	-8.18284	-153.885		106	-10.556	-56.0265	106	-7.81997	-282.83
106.2	-3.45672	-8.18284	-159.49		106.1	-4.95112	-53.5355	106.1	-8.13136	-284.387
106.3	-0.654297	-9.42836	-153.263		106.2	-9.93321	-52.9127	106.2	-3.77203	-287.501
106.4	4.3278	-11.9194	-148.281		106.3	-9.93321	-54.1582	106.3	-8.75411	-295.285
106.5	-0.342911	-9.42836	-146.724		106.4	-8.68769	-56.6493	106.4	-5.32893	-294.351
106.6	-3.14534	-7.56008	-141.43		106.5	-8.68769	-56.0265	106.5	1.83283	-293.728
106.7	-0.0315323	-8.18284	-138.005		106.6	-7.44217	-56.6493	106.6	-4.39478	-293.417
106.8	-2.52258	-6.31455	-138.939		106.7	-9.93321	-56.6493	106.7	-6.26307	-294.04
106.9	-2.52258	-10.0511	-143.61		106.8	-8.68769	-57.272	106.8	-0.03545	-291.237
107	-5.01363	-10.6739	-145.167		106.9	-8.68769	-61.0086	106.9	3.07835	-284.387
107.1	-5.63638	-11.2966	-139.873		107	-8.06493	-64.1224	107	-1.90374	-281.585
107.2	-5.01363	-8.8056	-131.466		107.1	-8.68769	-62.8769	107.1	-2.21512	-281.896
107.3	-3.45672	-8.8056	-147.969		107.2	-7.44217	-65.9907	107.2	-3.46064	-281.585
107.4	-1.27705	-10.6739	-137.382		107.3	-6.8194	-65.9907	107.3	-1.28098	-279.716
107.5	1.83675	-6.31455	-138.316		107.4	-9.93321	-65.9907	107.4	-0.03545	-275.357
107.6	-2.2112	-7.56008	-142.987		107.5	-10.556	-67.859	107.5	-0.65822	-268.507
107.7	-4.07948	-6.31455	-141.119		107.6	-9.31045	-70.35	107.6	-0.9696	-274.734
107.8	-7.50467	-10.0511	-140.185		107.7	-10.556	-67.859	107.7	-1.90374	-278.782
107.9	-7.81605	-10.6739	-142.987		107.8	-10.556	-69.1045	107.8	0.587303	-282.207
108	-1.27705	-9.42836	-146.101		107.9	-9.31045	-65.3679	107.9	-0.34683	-283.141
108.1	-6.25914	-5.69179	-147.658		108	-8.68769	-64.7452	108	-1.90374	-280.962
108.2	-9.06157	-6.93731	-148.592		108.1	-8.68769	-62.8769	108.1	-3.14926	-283.453
108.3	-6.25914	-5.06903	-146.412		108.2	-10.556	-65.3679	108.2	-0.9696	-294.663
108.4	-6.57053	-6.93731	-145.167		108.3	-9.31045	-63.4996	108.3	-3.46064	-295.597
108.5	-8.43881	-8.18284	-147.346		108.4	-13.6698	-59.1403	108.4	-5.6403	-296.219
108.6	-8.75019	-2.57799	-146.101		108.5	-10.556	-59.7631	108.5	-2.21512	-294.974
108.7	-5.63638	-5.06903	-147.969		108.6	-9.93321	-59.1403	108.6	-8.75411	-285.944
108.8	-8.12743	-3.20075	-142.676		108.7	-8.68769	-57.8948	108.7	-9.68826	-283.141
108.9	-7.19328	-3.82351	-140.496		108.8	-10.556	-54.781	108.8	-8.13136	-284.076
109	-7.50467	-5.06903	-138.005		108.9	-11.1787	-55.4037	108.9	-6.26307	-287.812
109.1	-9.06157	-4.44627	-139.873		109	-10.556	-54.781	109	-2.83788	-295.908
109.2	-8.12743	-7.56008	-138.316		109.1	-14.2925	-54.1582	109.1	-2.21512	-291.237
109.3	-5.94776	-3.82351	-141.119		109.2	-11.1787	-52.9127	109.2	-1.90374	-290.303
109.4	-5.63638	-1.33246	-138.005		109.3	-11.1787	-52.9127	109.3	-7.50859	-294.663
109.5	-4.70224	-4.44627	-132.4		109.4	-11.1787	-52.2899	109.4	-8.13136	-284.076
109.6	-5.94776	-7.56008	-129.909		109.5	-11.1787	-52.2899	109.5	-10.311	-263.524
109.7	-4.70224	-3.82351	-126.795		109.6	-15.5381	-51.0444	109.6	-5.32893	-263.213
109.8	-3.45672	-5.06903	-133.646		109.7	-11.1787	-52.2899	109.7	-8.75411	-259.477
109.9	-4.70224	-3.82351	-135.203		109.8	-13.047	-54.781	109.8	-9.37688	-265.393
110	-7.81605	-8.8056	-132.089		109.9	-15.5381	-61.0086	109.9	-10.6224	-266.638
					110	-14.2925	-60.3858	110	-12.1793	-259.165
