# Supplementary material for: Functional implications of the exon 9 splice insert in GluK1 kainate receptors
Source: eLife. 2024 Nov 6;12:RP89755. doi: 10.7554/eLife.89755 (PMC11540303; doi:10.7554/eLife.89755)
Supplement: Figure 5—figure supplement 2—source data 1. [file elife-89755-fig5-figsupp2-data1.xlsx]

## Sheet: Figure 5-figure supplement 2
A											B
with Neto1						with Neto2					K368-E + Neto1				K368-E + Neto2					K375_379_382H376-E + Neto1				K375_379_382H376-E + Neto2
Time (ms)	K368-E	K375/379/382H376-E	K368/375/379/382H376-E	GluK1-1a		Time (ms)	K368-E	K375/379/382H376-E	GluK1-1a		Time (ms)	10 mM Glu	1 mM Kai		Time (ms)	10 mM Glu	1 mM Kai		Time (ms)	10 mM Glu	1 mM Kai		Time (ms)	10 mM Glu	1 mM Kai
0	3.73265	-1.45522	-0.586941	-3.70075		0	1.59272	-2.75765	-1.21698		0	2.46343	0.592723		0	-0.636568	-0.359329		0	-1.88284	1.52687		0	0.3375	-3.81455
0.1	4.97817	0.72444	0.3472	-3.07799		0.1	-0.27556	-0.889367	-0.9056		0.1	-0.961755	3.39515		0.1	2.16586	1.19757		0.1	-3.12836	0.592723		0.1	-0.285263	2.10168
0.2	1.55298	-2.07799	2.21548	-4.32351		0.2	-1.83246	-1.51213	-2.15112		0.2	-0.0276127	1.21548		0.2	1.5431	-0.67071		0.2	-2.81698	1.21548		0.2	1.8944	-3.19179
0.3	1.2416	-3.01213	0.03582	-0.586941		0.3	-0.898322	-0.266605	1.58545		0.3	-0.338993	2.14963		0.3	0.920336	1.19757		0.3	-1.26008	1.52687		0.3	0.96026	-1.32351
0.4	0.930222	-3.01213	-1.83246	0.3472		0.4	-2.45522	0.044775	-2.77388		0.4	3.39757	0.281343		0.4	1.85448	-0.359329		0.4	-3.43974	-0.0300379		0.4	-2.46493	2.72444
0.5	0.618841	-5.19179	-0.586941	-2.76661		0.5	0.969962	-0.577986	1.89683		0.5	-1.8959	0.281343		0.5	0.920336	-2.53899		0.5	-3.43974	0.592723		0.5	-0.596643	4.28134
0.6	1.86436	-3.63489	-0.586941	-0.27556		0.6	0.03582	0.978917	-2.15112		0.6	0.595149	4.95205		0.6	-0.325187	0.574813		0.6	-1.88284	2.46101		0.6	3.13993	0.544775
0.7	5.91231	-3.01213	-2.45522	-2.76661		0.7	-0.898322	0.667536	-2.77388		0.7	1.52929	3.70653		0.7	0.608955	1.82034		0.7	-1.88284	3.39515		0.7	-2.15355	1.16754
0.8	7.15784	-1.14384	0.658581	-4.63489		0.8	-1.52108	0.667536	0.962685		0.8	0.595149	1.52687		0.8	1.5431	-2.85037		0.8	-2.19422	1.21548		0.8	-6.82425	3.3472
0.9	3.42127	-2.38937	0.658581	-1.83246		0.9	-1.52108	-1.20075	-1.52836		0.9	-0.338993	0.592723		0.9	2.78862	0.263433		0.9	-3.12836	0.281343		0.9	-2.15355	-3.19179
1	1.86436	-1.76661	1.28134	-1.2097		1	-3.38937	1.91306	5.94477		1	-3.4528	1.21548		1	-0.325187	-1.29347		1	-4.68526	2.14963		1	-1.2194	-1.63489
1.1	5.60093	-3.63489	-1.83246	-0.27556		1.1	-0.586941	0.356155	-4.33079		1.1	0.595149	-0.0300379		1.1	-0.325187	-2.22761		1.1	-2.19422	3.39515		1.1	-4.95597	-0.700747
1.2	1.55298	-3.63489	-1.83246	-3.38937		1.2	-0.898322	0.978917	-8.37873		1.2	-3.76418	-0.341419		1.2	1.5431	-1.91623		1.2	-2.81698	1.52687		1.2	-4.64459	0.233395
1.3	2.48713	-0.832464	-4.01213	2.21548		1.3	-0.898322	-1.51213	-0.594219		1.3	0.906529	1.83825		1.3	0.297574	-2.22761		1.3	-0.948696	1.83825		1.3	-6.51287	-0.389367
1.4	-0.938061	-0.521083	1.59272	1.9041		1.4	-1.2097	-5.56008	0.651304		1.4	0.283768	4.01791		1.4	0.920336	0.886194		1.4	-3.12836	0.904104		1.4	-7.44702	-1.94627
1.5	0.618841	-1.76661	0.969962	-2.76661		1.5	-2.76661	-1.51213	-3.39664		1.5	0.595149	1.52687		1.5	-1.88209	-1.29347		1.5	-3.43974	-0.341419		1.5	-4.33321	1.47892
1.6	1.86436	-1.76661	-0.27556	-1.83246		1.6	1.28134	0.044775	0.651304		1.6	-0.961755	2.46101		1.6	1.5431	-2.85037		1.6	-6.55355	-0.341419		1.6	-3.71045	0.544775
1.7	-0.3153	-1.76661	-4.01213	-2.45522		1.7	0.658581	0.978917	1.27407		1.7	1.52929	6.19757		1.7	3.1	-1.91623		1.7	-2.81698	2.14963		1.7	-5.57873	0.233395
1.8	-2.49496	-2.70075	-0.586941	0.03582		1.8	-1.2097	0.978917	1.58545		1.8	-0.650374	1.21548		1.8	-0.325187	-2.85037		1.8	-3.12836	-0.341419		1.8	-6.82425	-1.01213
1.9	-6.23153	-2.07799	1.59272	0.658581		1.9	1.59272	0.978917	1.27407		1.9	2.77481	3.39515		1.9	1.85448	-3.47313		1.9	-5.93079	-0.0300379		1.9	-6.82425	-0.700747
2	-1.24944	-4.56903	-3.38937	-2.14384		2	0.658581	0.044775	-1.21698		2	3.39757	3.70653		2	-0.0138063	-3.47313		2	-4.37388	-0.6528		2	-7.44702	2.72444
2.1	-0.3153	-2.38937	-1.2097	-2.14384		2.1	-1.52108	-4.00317	-4.33079		2.1	4.33172	1.52687		2.1	-0.325187	-5.03004		2.1	-1.57146	0.592723		2.1	-6.51287	-4.7487
2.2	-1.56082	-2.70075	0.658581	-1.2097		2.2	2.52687	0.667536	-1.21698		2.2	1.52929	5.26343		2.2	-0.636568	-0.67071		2.2	-3.12836	0.592723		2.2	-6.20149	-1.63489
2.3	-2.18358	-0.521083	1.28134	-0.27556		2.3	1.28134	-4.62593	-4.64217		2.3	0.595149	3.70653		2.3	1.23172	-1.29347		2.3	-2.5056	0.592723		2.3	-8.69254	-0.0779858
2.4	-3.42911	-5.50317	0.658581	-3.07799		2.4	-2.45522	2.8472	-8.37873		2.4	3.39757	1.21548		2.4	0.297574	-1.60485		2.4	-1.57146	0.592723		2.4	-10.8722	-1.94627
2.5	2.17575	-2.70075	-1.52108	-0.586941		2.5	2.52687	0.978917	-1.52836		2.5	0.595149	2.46101		2.5	-0.636568	1.50896		2.5	-3.75112	0.281343		2.5	-6.82425	-0.700747
2.6	1.55298	-3.01213	-4.32351	-2.76661		2.6	-1.52108	-1.20075	-2.77388		2.6	2.77481	1.52687		2.6	0.297574	-1.29347		2.6	-3.75112	1.21548		2.6	-4.33321	-4.43731
2.7	-0.0039196	-2.70075	1.59272	-2.45522		2.7	0.03582	-0.577986	-4.64217		2.7	1.52929	4.01791		2.7	1.23172	2.4431		2.7	-3.12836	0.904104		2.7	-4.95597	0.544775
2.8	-2.18358	-3.32351	1.9041	-2.45522		2.8	-1.2097	3.78134	2.20821		2.8	2.46343	2.77239		2.8	0.608955	-0.98209		2.8	-3.12836	-0.341419		2.8	-4.33321	-0.0779858
2.9	-2.49496	-3.32351	-2.45522	-1.2097		2.9	0.03582	-2.13489	0.339924		2.9	4.02034	3.08377		2.9	0.920336	-1.60485		2.9	-1.26008	-0.6528		2.9	-5.89011	-2.56903
3	-3.42911	-1.76661	-1.2097	0.03582		3	2.83825	-3.06903	-2.15112		3	1.84067	0.281343		3	1.5431	-0.359329		3	-0.637316	0.904104		3	-6.51287	-1.94627
3.1	-0.938061	-0.521083	-1.52108	-2.45522		3.1	0.3472	-3.06903	-0.594219		3.1	4.33172	2.77239		3.1	0.920336	-0.0479479		3.1	-2.19422	-0.341419		3.1	-4.33321	-2.56903
3.2	-2.49496	-5.19179	-3.07799	-0.27556		3.2	-0.586941	-0.577986	-0.594219		3.2	1.21791	-0.96418		3.2	0.297574	1.19757		3.2	-1.88284	-0.341419		3.2	-4.95597	-1.94627
3.3	-4.67463	-3.63489	-1.83246	-1.2097		3.3	-0.586941	2.8472	-4.01941		3.3	6.2	3.08377		3.3	-0.636568	1.82034		3.3	-3.12836	0.592723		3.3	-4.33321	-0.0779858
3.4	-5.29739	-2.07799	0.3472	1.28134		3.4	0.658581	0.978917	2.83097		3.4	2.46343	1.83825		3.4	-0.0138063	0.574813		3.4	-2.81698	0.281343		3.4	-4.64459	1.47892
3.5	-9.34534	-2.38937	-2.14384	-0.27556		3.5	1.9041	3.15858	-0.282839		3.5	3.08619	0.904104		3.5	-0.947948	0.886194		3.5	-1.88284	-0.0300379		3.5	-3.08769	-1.94627
3.6	-3.42911	-1.45522	-3.70075	-1.52108		3.6	-1.2097	0.667536	-3.39664		3.6	4.02034	3.08377		3.6	-0.636568	2.4431		3.6	-0.948696	-0.6528		3.6	-3.08769	-5.99422
3.7	1.55298	-3.01213	0.3472	-1.83246		3.7	-0.898322	-2.44627	0.0285435		3.7	1.21791	1.83825		3.7	1.23172	2.13172		3.7	-2.81698	0.281343		3.7	-8.38116	-2.56903
3.8	-0.0039196	-1.45522	2.52687	-1.2097		3.8	-0.27556	1.91306	0.962685		3.8	1.52929	1.83825		3.8	-0.0138063	2.13172		3.8	-3.43974	-2.2097		3.8	-4.64459	-5.06008
3.9	-2.49496	-1.76661	-1.2097	0.03582		3.9	2.21548	-1.20075	-5.26493		3.9	2.15205	-0.0300379		3.9	0.297574	0.263433		3.9	-0.948696	-0.0300379		3.9	-3.71045	-1.01213
4	-1.56082	-1.45522	1.28134	0.03582		4	-0.898322	-2.13489	5.01063		4	2.77481	-0.96418		4	0.920336	1.19757		4	-4.37388	1.83825		4	-4.64459	-4.43731
4.1	1.55298	-3.32351	-5.56903	-5.56903		4.1	1.28134	0.044775	-0.594219		4.1	-3.4528	-0.96418		4.1	0.297574	3.68862		4.1	-3.12836	1.21548		4.1	-4.33321	-1.94627
4.2	-1.8722	-3.32351	-2.45522	-0.586941		4.2	0.3472	2.53582	-0.282839		4.2	-4.38694	1.83825		4.2	-1.25933	1.82034		4.2	-4.99664	0.904104		4.2	-4.02183	0.856155
4.3	-0.3153	1.65858	2.52687	1.9041		4.3	3.46101	1.91306	1.27407		4.3	0.906529	2.46101		4.3	-1.88209	1.19757		4.3	-1.57146	1.83825		4.3	-4.02183	-3.50317
4.4	-1.24944	-1.76661	-0.586941	-2.14384		4.4	0.03582	-0.577986	-2.15112		4.4	-1.27314	-0.341419		4.4	-0.0138063	-0.359329		4.4	-0.014555	-0.341419		4.4	-2.15355	-1.32351
4.5	1.2416	-2.38937	-0.586941	1.28134		4.5	0.3472	-1.20075	-0.594219		4.5	-1.8959	0.281343		4.5	-0.325187	0.263433		4.5	-0.014555	0.592723		4.5	-3.08769	-0.700747
4.6	-0.3153	-1.14384	2.21548	-0.27556		4.6	2.21548	-7.11698	3.14235		4.6	-1.58452	-0.0300379		4.6	-0.325187	1.19757		4.6	1.85373	-0.0300379		4.6	-2.77631	-8.48526
4.7	-4.36325	-0.209702	-3.70075	-1.2097		4.7	1.59272	0.978917	1.58545		4.7	-2.51866	0.281343		4.7	-2.50485	1.19757		4.7	-0.637316	-0.341419		4.7	-3.08769	-5.37146
4.8	-5.29739	-3.01213	0.658581	-0.27556		4.8	-0.27556	2.22444	0.651304		4.8	-3.76418	-0.96418		4.8	-0.947948	0.886194		4.8	0.608208	-0.0300379		4.8	-4.02183	-1.01213
4.9	-7.78844	-3.32351	-1.83246	2.52687		4.9	2.83825	-1.51213	1.89683		4.9	-0.650374	-0.341419		4.9	-2.19347	-0.98209		4.9	-0.948696	1.21548		4.9	-3.39907	-2.25765
5	-3.42911	-1.45522	2.52687	4.08377		5	2.21548	-1.51213	1.58545		5	-2.51866	0.592723		5	-0.0138063	-0.359329		5	-0.325935	0.281343		5	-4.64459	-0.0779858
5.1	-0.0039196	-1.14384	-1.52108	0.3472		5.1	-1.2097	0.044775	-2.77388		5.1	-3.14142	2.46101		5.1	-0.947948	-0.67071		5.1	0.296825	1.52687		5.1	-5.89011	-1.01213
5.2	1.86436	-1.76661	-1.83246	4.39515		5.2	0.969962	3.46996	4.38787		5.2	-1.58452	4.32929		5.2	0.297574	-1.29347		5.2	-2.5056	-0.341419		5.2	-3.08769	-5.37146
5.3	-0.3153	-2.07799	0.3472	2.21548		5.3	1.28134	-1.82351	3.14235		5.3	-4.69832	2.77239		5.3	-0.636568	-2.85037		5.3	-2.19422	0.904104		5.3	-3.71045	-3.19179
5.4	-0.938061	-2.38937	-1.2097	-0.27556		5.4	2.52687	1.2903	0.651304		5.4	-5.0097	4.64067		5.4	-2.50485	-1.91623		5.4	-2.5056	1.21548		5.4	-3.08769	-0.389367
5.5	4.35541	-0.209702	2.21548	2.52687		5.5	1.28134	2.53582	0.0285435		5.5	-3.76418	4.95205		5.5	0.608955	-3.78452		5.5	-0.637316	-0.6528		5.5	-5.89011	-1.01213
5.6	1.2416	-0.832464	-0.27556	-3.07799		5.6	4.70653	-0.577986	-0.9056		5.6	-2.51866	5.26343		5.6	-0.636568	1.19757		5.6	-0.948696	1.21548		5.6	-4.33321	-4.43731
5.7	-2.49496	-3.32351	-2.14384	0.3472		5.7	1.59272	1.60168	-1.83974		5.7	-4.07556	5.26343		5.7	-1.25933	-2.85037		5.7	-1.57146	0.904104		5.7	-5.57873	-3.81455
5.8	1.55298	-1.45522	-9.92836	3.14963		5.8	4.08377	-2.13489	1.58545		5.8	-4.69832	4.01791		5.8	-1.88209	-3.78452		5.8	-2.81698	2.46101		5.8	-7.13564	-7.55112
5.9	0.618841	-2.07799	-2.45522	2.21548		5.9	4.70653	0.356155	0.651304		5.9	-2.51866	7.4431		5.9	-1.88209	-3.78452		5.9	-1.88284	1.83825		5.9	-5.26735	-3.50317
6	3.10989	-1.45522	1.59272	-1.52108		6	1.28134	0.356155	1.89683		6	-2.83004	5.57481		6	-0.947948	-2.22761		6	-0.325935	0.592723		6	-6.51287	-0.389367
6.1	-2.18358	-2.38937	0.03582	-2.76661		6.1	1.59272	-0.577986	1.89683		6.1	-2.20728	3.39515		6.1	-3.43899	-1.29347		6.1	-0.325935	3.70653		6.1	-7.44702	-1.32351
6.2	-0.62668	-0.832464	-1.52108	-1.2097		6.2	3.46101	-4.31455	-1.83974		6.2	-4.07556	4.64067		6.2	-2.50485	-3.16175		6.2	-1.88284	-0.0300379		6.2	-4.33321	-2.56903
6.3	0.930222	1.03582	1.28134	1.59272		6.3	-3.07799	3.15858	1.27407		6.3	-1.27314	4.01791		6.3	-3.12761	-0.67071		6.3	-2.81698	1.52687		6.3	-5.57873	-5.37146
6.4	-4.36325	1.03582	-2.76661	0.3472		6.4	2.21548	5.33825	3.14235		6.4	-2.51866	4.01791		6.4	-0.325187	-2.53899		6.4	-5.30803	0.904104		6.4	-7.7584	-5.06008
6.5	1.2416	1.03582	-2.14384	-2.14384		6.5	-1.83246	-4.00317	3.76511		6.5	-2.51866	5.88619		6.5	-0.325187	-3.16175		6.5	-2.81698	1.21548		6.5	-9.93806	-5.99422
6.6	-0.0039196	1.03582	0.3472	-0.586941		6.6	2.52687	5.96101	0.962685		6.6	-0.0276127	3.70653		6.6	-0.947948	-0.67071		6.6	-0.325935	0.904104		6.6	-8.38116	0.856155
6.7	-0.938061	0.413059	-0.586941	2.21548		6.7	3.14963	1.91306	2.83097		6.7	-1.58452	4.95205		6.7	-0.636568	0.263433		6.7	-1.57146	2.46101		6.7	-6.20149	-5.37146
6.8	0.307461	-0.521083	1.28134	-0.27556		6.8	1.28134	2.22444	-3.70802		6.8	-0.338993	4.32929		6.8	-1.88209	-0.359329		6.8	0.608208	1.83825		6.8	-10.8722	4.59272
6.9	-2.18358	-1.45522	0.03582	-0.27556		6.9	1.59272	2.53582	1.89683		6.9	0.906529	5.26343		6.9	0.297574	2.4431		6.9	-0.637316	1.83825		6.9	-6.20149	-4.7487
7	0.307461	-1.14384	-1.52108	2.83825		7	-0.586941	0.356155	5.01063		7	0.906529	4.64067		7	0.297574	0.263433		7	-1.88284	1.21548		7	-11.8063	-10.3535
7.1	-0.0039196	-2.38937	1.28134	3.14963		7.1	5.32929	-2.13489	6.25616		7.1	-0.0276127	2.14963		7.1	-2.50485	0.574813		7.1	-0.948696	1.21548		7.1	-7.44702	2.41306
7.2	-1.24944	0.101678	1.9041	-2.45522		7.2	0.658581	-2.13489	-0.594219		7.2	-0.0276127	8.68862		7.2	-0.636568	0.574813		7.2	1.85373	2.14963		7.2	-9.62668	3.65858
7.3	-1.8722	0.413059	-2.76661	0.03582		7.3	6.26343	3.46996	0.651304		7.3	-0.0276127	4.32929		7.3	-2.50485	0.574813		7.3	1.23097	2.46101		7.3	-5.57873	-0.700747
7.4	-3.42911	0.413059	0.3472	4.70653		7.4	0.03582	-8.05112	-1.52836		7.4	-0.961755	4.64067		7.4	-1.88209	1.50896		7.4	1.54235	0.904104		7.4	-6.82425	2.10168
7.5	0.307461	2.28134	1.59272	-0.586941		7.5	1.28134	4.09272	4.69925		7.5	0.906529	3.70653		7.5	0.608955	0.263433		7.5	0.608208	1.83825		7.5	-14.2974	-4.7487
7.6	-0.0039196	0.413059	0.03582	-0.586941		7.6	0.03582	1.60168	0.651304		7.6	-1.27314	5.26343		7.6	-3.75037	0.574813		7.6	2.47649	1.83825		7.6	-13.3632	-2.25765
7.7	0.930222	1.03582	-0.586941	0.969962		7.7	3.46101	-0.266605	4.38787		7.7	-0.0276127	-0.96418		7.7	-0.325187	0.886194		7.7	0.608208	1.52687		7.7	-12.4291	1.16754
7.8	2.79851	3.52687	0.969962	-3.07799		7.8	1.9041	5.96101	1.89683		7.8	0.595149	0.281343		7.8	-0.636568	-0.67071		7.8	1.54235	0.904104		7.8	-5.89011	3.03582
7.9	1.86436	2.28134	0.3472	-4.63489		7.9	-1.52108	7.82929	4.38787		7.9	-0.338993	-0.0300379		7.9	-4.37314	0.263433		7.9	0.296825	4.01791		7.9	-8.38116	-4.43731
8	-0.3153	0.101678	2.83825	1.28134		8	4.39515	-0.577986	3.14235		8	0.595149	-1.58694		8	-2.50485	1.82034		8	2.16511	1.21548		8	1.58302	-9.10802
8.1	4.04403	-0.832464	1.9041	1.59272		8.1	-4.01213	0.356155	6.56754		8.1	-0.0276127	-0.0300379		8.1	-2.50485	1.82034		8.1	0.919587	1.52687		8.1	-5.57873	-10.9763
8.2	0.930222	-0.209702	-0.586941	1.9041		8.2	5.64067	-1.20075	1.89683		8.2	0.595149	-1.27556		8.2	-1.88209	3.37724		8.2	-0.014555	0.904104		8.2	-6.51287	-5.06008
8.3	-0.0039196	0.413059	2.83825	1.9041		8.3	-0.586941	1.91306	0.962685		8.3	-3.14142	-0.6528		8.3	0.920336	4		8.3	-0.325935	1.52687		8.3	-2.46493	-1.32351
8.4	-2.80635	1.3472	4.39515	-0.586941		8.4	1.9041	3.15858	0.0285435		8.4	-2.51866	-4.07799		8.4	-2.81623	-0.67071		8.4	-0.948696	1.21548		8.4	-4.95597	-2.25765
8.5	-1.8722	0.413059	1.9041	2.52687		8.5	-7.7487	7.82929	0.339924		8.5	-0.0276127	-0.0300379		8.5	-2.19347	5.24552		8.5	0.608208	3.08377		8.5	-6.51287	-1.01213
8.6	-1.8722	-1.76661	1.28134	3.46101		8.6	-0.27556	-1.82351	1.58545		8.6	0.906529	-1.27556		8.6	-3.75037	1.82034		8.6	-1.26008	1.21548		8.6	-1.53078	-5.37146
8.7	-3.11773	1.03582	-0.27556	0.3472		8.7	1.28134	-7.42836	1.58545		8.7	-3.76418	-1.58694		8.7	-4.68452	1.19757		8.7	0.919587	1.52687		8.7	-4.95597	-1.63489
8.8	-4.05187	1.65858	-1.83246	0.658581		8.8	0.658581	-5.87146	-1.83974		8.8	-3.4528	-3.14384		8.8	-7.48694	-0.67071		8.8	3.41063	1.52687		8.8	-3.08769	2.10168
8.9	2.48713	1.03582	1.28134	1.28134		8.9	7.50896	-5.87146	3.76511		8.9	-0.338993	-4.38937		8.9	-7.48694	0.886194		8.9	0.608208	2.46101		8.9	-5.57873	4.59272
9	0.930222	0.413059	2.21548	3.14963		9	-1.83246	-8.67388	1.27407		9	-0.338993	-5.63489		9	-9.35522	0.574813		9	2.47649	1.83825		9	0.96026	4.59272
9.1	1.2416	1.96996	-2.14384	-0.27556		9.1	11.5569	-2.13489	3.45373		9.1	-0.961755	-2.83246		9.1	-9.6666	0.886194		9.1	0.296825	2.14963		9.1	-8.69254	11.4431
9.2	4.97817	-0.521083	-1.83246	2.52687		9.2	2.21548	3.46996	3.76511		9.2	-2.83004	-6.56903		9.2	-9.97799	-0.359329		9.2	-0.948696	4.01791		9.2	-13.0519	8.01791
9.3	3.10989	-2.07799	-4.01213	-0.586941		9.3	10.9341	-6.18284	1.89683		9.3	-4.07556	-1.89832		9.3	-16.2056	-1.60485		9.3	-1.26008	4.64067		9.3	-15.5429	8.01791
9.4	3.10989	-0.209702	0.969962	1.59272		9.4	5.95205	-2.75765	2.83097		9.4	-2.20728	-6.56903		9.4	-17.4511	0.263433		9.4	1.85373	-1.58694		9.4	-13.0519	7.70653
9.5	1.55298	-2.70075	-3.07799	-0.586941		9.5	14.3593	5.33825	1.58545		9.5	-0.338993	-7.81455		9.5	-20.2535	-2.85037		9.5	0.919587	-6.25765		9.5	-7.13564	6.46101
9.6	-1.8722	-3.94627	-0.898322	-2.14384		9.6	0.03582	4.4041	2.20821		9.6	-5.32108	-5.63489		9.6	-20.5649	-1.29347		9.6	-1.88284	-14.3535		9.6	-2.77631	5.52687
9.7	-4.36325	-4.56903	3.77239	1.28134		9.7	3.77239	7.51791	2.83097		9.7	-4.69832	-5.94627		9.7	-27.1039	-2.22761		9.7	-7.48769	-22.4494		9.7	-5.26735	-0.389367
9.8	-1.24944	-5.50317	-3.70075	1.28134		9.8	0.658581	10.009	6.87892		9.8	-2.83004	-4.70075		9.8	-33.0202	-2.53899		9.8	-8.73321	-28.6771		9.8	-8.06978	0.233395
9.9	-3.42911	-10.7966	0.03582	-2.76661		9.9	-2.45522	7.51791	5.63339		9.9	-10.3032	-9.68284		9.9	-40.8047	-2.85037		9.9	-19.0088	-33.6591		9.9	-9.93806	-1.32351
10	-4.67463	-16.4015	-0.586941	2.83825		10	0.03582	8.14067	-4.01941		10	-7.81213	-12.4853		10	-50.1461	-4.40728		10	-36.4461	-49.5396		10	-2.15355	-16.8925
10.1	-12.1478	-21.0722	-1.2097	2.21548		10.1	-6.81455	10.9431	-10.247		10.1	-4.38694	-16.5332		10.1	-52.0144	-1.29347		10.1	-63.5362	-67.911		10.1	1.27164	-31.216
10.2	-13.3933	-32.9047	0.658581	1.59272		10.2	0.3472	5.33825	-24.8819		10.2	-9.05765	-17.4674		10.2	-57.3078	-3.47313		10.2	-87.8239	-83.1687		10.2	1.8944	-52.0786
10.3	-25.2257	-57.8151	-3.70075	2.52687		10.3	-10.8625	-1.82351	-45.1217		10.3	-9.36903	-24.3177		10.3	-63.8468	-3.78452		10.3	-132.351	-103.408		10.3	0.0261192	-78.8573
10.4	-37.3696	-89.5759	-14.2877	-0.27556		10.4	-4.94627	-17.0812	-79.6849		10.4	-14.0397	-33.0364		10.4	-77.859	-5.6528		10.4	-194.627	-134.235		10.4	1.58302	-118.091
10.5	-52.9386	-138.463	-20.5153	-7.7487		10.5	-21.4494	-43.8599	-109.266		10.5	-22.1356	-33.6591		10.5	-85.3321	-6.89832		10.5	-280.88	-177.828		10.5	3.76269	-174.451
10.6	-61.6573	-191.709	-19.2698	-27.9884		10.6	-29.8567	-107.693	-160.021		10.6	-33.034	-39.5754		10.6	-89.3801	-14.3715		10.6	-384.881	-216.751		10.6	5.00821	-256.656
10.7	-77.8491	-266.129	-26.4315	-74.3841		10.7	-56.3241	-216.988	-246.896		10.7	-43.3095	-49.8509		10.7	-104.015	-13.7487		10.7	-507.876	-255.674		10.7	-5.26735	-351.315
10.8	-97.466	-366.082	-35.1502	-154.098		10.8	-89.6418	-375.792	-348.718		10.8	-53.2737	-68.5338		10.8	-119.273	-15.3056		10.8	-657.028	-299.578		10.8	-7.7584	-432.897
10.9	-113.346	-487.832	-67.8452	-261.524		10.9	-125.139	-568.225	-462.994		10.9	-62.9265	-98.1149		10.9	-125.5	-17.4853		10.9	-811.784	-362.788		10.9	-14.9202	-526.311
11	-121.754	-606.156	-102.72	-407.25		11	-168.421	-778.407	-565.127		11	-71.6452	-111.193		11	-135.776	-21.2218		11	-1006.4	-417.28		11	-35.7827	-624.396
11.1	-135.143	-731.643	-140.708	-577.575		11.1	-221.044	-1020.35	-676.29		11.1	-82.5435	-132.367		11.1	-151.968	-29.9405		11.1	-1210.04	-464.299		11.1	-79.6873	-721.547
11.2	-142.616	-860.554	-182.433	-752.571		11.2	-296.087	-1275.99	-784.962		11.2	-97.8011	-146.69		11.2	-170.65	-40.5274		11.2	-1395	-525.018		11.2	-173.413	-833.333
11.3	-152.269	-1012.82	-221.979	-940.956		11.3	-357.118	-1543.78	-907.335		11.3	-104.34	-175.026		11.3	-182.171	-49.2461		11.3	-1592.73	-602.24		11.3	-321.63	-946.675
11.4	-163.479	-1176.92	-262.458	-1120.62		11.4	-443.37	-1778.25	-1063.34		11.4	-111.502	-194.02		11.4	-194.004	-54.8509		11.4	-1781.11	-667.319		11.4	-514.997	-1062.82
11.5	-187.144	-1343.82	-293.596	-1287.21		11.5	-531.491	-1996.84	-1178.86		11.5	-115.238	-217.374		11.5	-205.214	-73.2224		11.5	-1900.37	-764.781		11.5	-751.335	-1167.76
11.6	-199.91	-1486.43	-319.129	-1430.76		11.6	-632.69	-2212.31	-1277.25		11.6	-125.203	-235.122		11.6	-220.471	-76.959		11.6	-2025.86	-847.297		11.6	-993.589	-1288.88
11.7	-204.581	-1618.77	-335.633	-1579.91		11.7	-752.883	-2444.6	-1397.45		11.7	-134.544	-244.775		11.7	-233.238	-89.4142		11.7	-2146.36	-936.663		11.7	-1276.63	-1418.11
11.8	-208.006	-1744.25	-362.1	-1707.89		11.8	-887.399	-2666.62	-1487.75		11.8	-141.706	-261.901		11.8	-243.202	-102.492		11.8	-2264.37	-1034.75		11.8	-1556.88	-1524.6
11.9	-207.383	-1860.09	-391.992	-1816.87		11.9	-989.532	-2835.7	-1570.89		11.9	-140.46	-286.189		11.9	-260.328	-108.72		11.9	-2376.47	-1103.56		11.9	-1810.65	-1611.78
12	-209.874	-1957.86	-420.328	-1916.2		12	-1114.4	-2989.83	-1653.4		12	-132.364	-304.56		12	-269.669	-121.798		12	-2474.87	-1188.26		12	-2028.31	-1708.93
12.1	-214.545	-2030.41	-447.107	-1989.69		12.1	-1202.2	-3132.76	-1719.42		12.1	-136.101	-323.243		12.1	-288.041	-142.038		12.1	-2568.59	-1262.68		12.1	-2252.5	-1788.03
12.2	-211.431	-2107.63	-459.251	-2043.24		12.2	-1280.67	-3258.86	-1791.66		12.2	-129.873	-343.794		12.2	-307.346	-170.685		12.2	-2630.56	-1334.3		12.2	-2474.52	-1872.41
12.3	-218.593	-2191.4	-456.137	-2102.09		12.3	-1361.63	-3390.89	-1844.59		12.3	-125.203	-369.95		12.3	-319.802	-182.828		12.3	-2649.24	-1422.73		12.3	-2690.61	-1955.24
12.4	-220.15	-2256.47	-448.041	-2168.42		12.4	-1421.42	-3492.09	-1905.93		12.4	-122.4	-394.549		12.4	-336.305	-200.577		12.4	-2673.84	-1482.51		12.4	-2884.92	-2045.85
12.5	-217.348	-2300.69	-447.73	-2212.64		12.5	-1460.96	-3561.53	-2008.69		12.5	-113.682	-405.759		12.5	-360.281	-225.488		12.5	-2682.87	-1528.91		12.5	-3056.17	-2118.4
12.6	-212.366	-2315.01	-433.406	-2252.18		12.6	-1509.54	-3654.94	-2042.63		12.6	-109.011	-416.035		12.6	-383.635	-252.578		12.6	-2711.21	-1570.32		12.6	-3187.58	-2169.16
12.7	-207.383	-2374.8	-430.915	-2279.58		12.7	-1569.95	-3746.49	-2103.66		12.7	-101.538	-433.472		12.7	-399.204	-273.129		12.7	-2731.76	-1622.95		12.7	-3313.38	-2223.34
12.8	-197.731	-2410.92	-423.13	-2296.71		12.8	-1611.67	-3822.15	-2146.63		12.8	-96.5556	-450.909		12.8	-411.97	-286.829		12.8	-2752	-1678.99		12.8	-3432.01	-2269.42
12.9	-190.88	-2429.6	-418.148	-2299.82		12.9	-1642.5	-3890.97	-2184		12.9	-87.5256	-458.071		12.9	-422.246	-297.105		12.9	-2754.8	-1754.66		12.9	-3540.99	-2300.25
13	-185.275	-2478.49	-415.969	-2318.5		13	-1670.52	-3938.3	-2236.93		13	-91.2621	-472.706		13	-440.617	-317.033		13	-2753.55	-1832.19		13	-3643.13	-2328.58
13.1	-182.162	-2490.94	-406.316	-2346.22		13.1	-1701.35	-3963.83	-2265.27		13.1	-91.5735	-481.736		13.1	-456.498	-349.417		13.1	-2754.49	-1910.97		13.1	-3739.03	-2357.54
13.2	-175.934	-2508.07	-400.711	-2376.11		13.2	-1729.06	-4003.06	-2323.18		13.2	-85.3459	-488.586		13.2	-472.69	-375.262		13.2	-2752.62	-1966.09		13.2	-3832.14	-2389.92
13.3	-171.575	-2484.09	-401.334	-2396.35		13.3	-1752.73	-4046.66	-2364.91		13.3	-86.5914	-499.485		13.3	-489.193	-407.022		13.3	-2761.65	-2019.96		13.3	-3912.47	-2433.83
13.4	-169.084	-2454.51	-396.974	-2394.17		13.4	-1744.32	-4079.35	-2374.25		13.4	-89.0825	-519.102		13.4	-502.582	-421.346		13.4	-2734.56	-2091.57		13.4	-3990.01	-2459.36
13.5	-159.431	-2450.15	-390.747	-2382.96		13.5	-1750.55	-4115.47	-2373		13.5	-82.5435	-529.377		13.5	-515.349	-436.292		13.5	-2705.6	-2158.21		13.5	-4038.58	-2486.45
13.6	-155.383	-2412.16	-376.423	-2392.92		13.6	-1771.1	-4143.19	-2393.24		13.6	-79.7411	-547.126		13.6	-524.067	-463.694		13.6	-2712.45	-2237.3		13.6	-4060.38	-2528.49
13.7	-147.91	-2385.07	-356.806	-2400.71		13.7	-1795.38	-4164.36	-2411.61		13.7	-78.8069	-554.288		13.7	-533.72	-487.047		13.7	-2699.37	-2300.51		13.7	-4105.53	-2560.87
13.8	-141.682	-2364.21	-351.202	-2397.91		13.8	-1792.58	-4182.42	-2432.17		13.8	-82.5435	-562.072		13.8	-546.487	-517.251		13.8	-2652.35	-2363.72		13.8	-4140.09	-2577.06
13.9	-132.652	-2333.7	-331.273	-2387.94		13.9	-1793.52	-4203.91	-2446.18		13.9	-83.789	-576.707		13.9	-559.876	-543.407		13.9	-2603.16	-2416.03		13.9	-4170.61	-2585.16
14	-134.209	-2328.71	-319.129	-2373		14	-1812.82	-4220.41	-2468.91		14	-86.9028	-587.294		14	-582.607	-564.581		14	-2585.1	-2446.24		14	-4217.31	-2604.78
14.1	-142.305	-2323.42	-307.92	-2345.28		14.1	-1824.65	-4244.7	-2479.5		14.1	-85.6573	-582.623		14.1	-599.422	-573.3		14.1	-2553.02	-2474.26		14.1	-4242.22	-2606.65
14.2	-135.454	-2296.33	-294.219	-2335.63		14.2	-1814.07	-4272.1	-2480.12		14.2	-85.6573	-593.21		14.2	-622.464	-594.474		14.2	-2534.65	-2507.58		14.2	-4281.15	-2622.84
14.3	-132.963	-2258.65	-284.877	-2329.71		14.3	-1804.41	-4288.91	-2503.78		14.3	-86.9028	-599.749		14.3	-631.494	-614.091		14.3	-2510.99	-2549.3		14.3	-4305.43	-2653.04
14.4	-130.784	-2211.64	-273.979	-2322.24		14.4	-1799.12	-4308.53	-2513.12		14.4	-90.0166	-611.582		14.4	-646.129	-636.199		14.4	-2483.27	-2599.12		14.4	-4315.71	-2677.95
14.5	-127.047	-2192.02	-261.835	-2305.43		14.5	-1775.77	-4317.56	-2515.62		14.5	-94.0646	-624.66		14.5	-662.943	-650.211		14.5	-2462.41	-2656.42		14.5	-4330.66	-2683.56
14.6	-120.508	-2154.34	-243.152	-2280.2		14.6	-1770.16	-4306.66	-2522.78		14.6	-85.9687	-635.558		14.6	-676.955	-667.337		14.6	-2428.47	-2701.26		14.6	-4347.78	-2694.45
14.7	-119.574	-2116.04	-240.039	-2249.38		14.7	-1775.15	-4310.71	-2520.29		14.7	-78.8069	-636.803		14.7	-690.033	-705.636		14.7	-2376.16	-2739.56		14.7	-4356.5	-2710.33
14.8	-121.131	-2104.21	-228.829	-2233.19		14.8	-1765.8	-4316.62	-2535.23		14.8	-74.4476	-629.33		14.8	-704.98	-737.086		14.8	-2352.5	-2773.81		14.8	-4366.46	-2734
14.9	-124.245	-2107.01	-228.829	-2199.25		14.9	-1751.48	-4317.25	-2551.74		14.9	-73.5134	-628.396		14.9	-721.171	-752.032		14.9	-2337.86	-2819.58		14.9	-4383.28	-2747.7
15	-118.017	-2050.65	-215.44	-2168.73		15	-1737.47	-4319.74	-2567.93		15	-76.0045	-633.378		15	-723.662	-768.224		15	-2306.41	-2846.05		15	-4390.44	-2739.6
15.1	-114.903	-1984.02	-207.344	-2131.99		15.1	-1745.25	-4316.62	-2576.33		15.1	-69.4655	-652.061		15.1	-730.513	-803.721		15.1	-2290.22	-2887.46		15.1	-4401.96	-2746.46
15.2	-114.592	-1924.23	-200.182	-2092.75		15.2	-1744.01	-4310.09	-2572.91		15.2	-62.3037	-655.175		15.2	-748.261	-827.075		15.2	-2282.75	-2947.25		15.2	-4410.37	-2759.53
15.3	-106.496	-1870.05	-192.397	-2075.32		15.3	-1742.76	-4308.22	-2576.02		15.3	-60.1241	-646.768		15.3	-753.866	-850.428		15.3	-2250.05	-2967.8		15.3	-4407.88	-2776.04
15.4	-99.023	-1846.07	-180.565	-2057.57		15.4	-1726.88	-4293.58	-2585.05		15.4	-57.9444	-660.78		15.4	-758.537	-878.764		15.4	-2213.93	-2971.22		15.4	-4403.52	-2786.31
15.5	-104.939	-1818.98	-179.942	-2004.32		15.5	-1740.89	-4277.39	-2606.54		15.5	-58.5672	-685.067		15.5	-777.531	-888.728		15.5	-2185.28	-2996.13		15.5	-4403.52	-2790.36
15.6	-113.346	-1785.35	-172.469	-1953.57		15.6	-1751.79	-4275.83	-2614.63		15.6	-63.8606	-687.247		15.6	-775.663	-907.411		15.6	-2164.73	-3050.63		15.6	-4401.34	-2790.67
15.7	-103.071	-1754.84	-160.948	-1911.22		15.7	-1741.52	-4275.21	-2615.88		15.7	-61.0582	-692.541		15.7	-773.795	-927.028		15.7	-2132.35	-3059.03		15.7	-4397.29	-2800.64
15.8	-96.2205	-1709.69	-155.032	-1870.74		15.8	-1733.11	-4272.41	-2581.63		15.8	-59.1899	-690.672		15.8	-783.136	-944.777		15.8	-2113.98	-3096.09		15.8	-4389.51	-2805.62
15.9	-96.2205	-1667.96	-148.493	-1832.75		15.9	-1736.53	-4271.79	-2538.66		15.9	-61.3696	-698.457		15.9	-785.627	-951.316		15.9	-2061.35	-3134.08		15.9	-4390.75	-2803.13
16	-91.2384	-1617.83	-144.133	-1781.37		16	-1727.5	-4263.69	-2516.24		16	-58.5672	-708.421		16	-784.382	-965.328		16	-2024.92	-3168.33		16	-4368.02	-2799.39
16.1	-94.0409	-1578.6	-144.445	-1735.29		16.1	-1710.38	-4249.37	-2539.9		16.1	-52.6509	-734.577		16.1	-790.298	-977.472		16.1	-1995.65	-3208.5		16.1	-4345.6	-2804.68
16.2	-94.3522	-1547.77	-142.888	-1699.17		16.2	-1699.48	-4238.78	-2565.44		16.2	-52.3396	-748.9		16.2	-797.148	-1003.32		16.2	-1986.31	-3249.91		16.2	-4328.48	-2798.46
16.3	-91.8612	-1513.83	-138.217	-1656.51		16.3	-1678.31	-4229.44	-2589.41		16.3	-61.3696	-751.703		16.3	-803.376	-1010.17		16.3	-1954.86	-3271.39		16.3	-4328.16	-2806.55
16.4	-83.4539	-1493.28	-134.792	-1622.88		16.4	-1664.6	-4215.74	-2586.3		16.4	-63.8606	-760.422		16.4	-816.142	-1040.68		16.4	-1896.32	-3282.29		16.4	-4322.87	-2818.07
16.5	-81.5856	-1481.45	-131.367	-1582.71		16.5	-1657.44	-4200.48	-2559.21		16.5	-56.0761	-771.32		16.5	-823.304	-1057.81		16.5	-1865.5	-3327.13		16.5	-4319.76	-2825.86
16.6	-73.4897	-1453.11	-124.828	-1531.02		16.6	-1652.77	-4186.78	-2586.61		16.6	-48.9144	-783.464		16.6	-831.4	-1065.59		16.6	-1814.43	-3350.49		16.6	-4309.79	-2845.47
16.7	-71.9328	-1407.96	-115.175	-1487.12		16.7	-1659	-4173.7	-2591.59		16.7	-55.4534	-787.2		16.7	-832.957	-1084.28		16.7	-1769.9	-3359.52		16.7	-4295.47	-2847.34
16.8	-77.5377	-1371.84	-108.325	-1439.48		16.8	-1651.84	-4154.08	-2562.32		16.8	-62.3037	-791.56		16.8	-831.089	-1097.35		16.8	-1718.21	-3375.4		16.8	-4273.36	-2836.13
16.9	-78.4718	-1344.13	-106.145	-1384.67		16.9	-1658.38	-4135.71	-2567.93		16.9	-60.4355	-780.039		16.9	-834.825	-1112.92		16.9	-1689.25	-3413.07		16.9	-4259.66	-2840.18
17	-70.0646	-1309.25	-105.211	-1340.15		17	-1645.92	-4121.39	-2568.24		17	-62.9265	-793.428		17	-844.478	-1136.9		17	-1649.71	-3445.77		17	-4247.83	-2854.5
17.1	-69.7532	-1290.88	-103.654	-1291.88		17.1	-1647.79	-4094.3	-2564.19		17.1	-62.3037	-804.638		17.1	-861.915	-1152.47		17.1	-1592.73	-3467.88		17.1	-4232.88	-2860.73
17.2	-66.328	-1254.14	-98.3605	-1247.04		17.2	-1643.43	-4087.76	-2551.11		17.2	-53.5851	-813.668		17.2	-860.359	-1152.47		17.2	-1551.62	-3494.03		17.2	-4211.4	-2861.35
17.3	-67.5735	-1225.18	-92.1328	-1201.58		17.3	-1634.71	-4094.3	-2548.93		17.3	-47.0461	-822.386		17.3	-858.179	-1168.97		17.3	-1551.94	-3509.6		17.3	-4187.42	-2875.37
17.4	-71.6215	-1201.52	-85.2825	-1151.14		17.4	-1629.11	-4084.96	-2563.88		17.4	-51.7168	-819.272		17.4	-868.143	-1193.88		17.4	-1533.25	-3529.84		17.4	-4181.82	-2896.85
17.5	-77.2263	-1166.33	-84.0369	-1098.52		17.5	-1613.23	-4083.71	-2579.14		17.5	-47.0461	-821.452		17.5	-869.7	-1205.09		17.5	-1476.27	-3548.21		17.5	-4177.14	-2890.62
17.6	-72.5556	-1128.65	-82.48	-1052.74		17.6	-1587.69	-4078.11	-2575.4		17.6	-48.2916	-821.141		17.6	-869.389	-1209.45		17.6	-1423.65	-3555.37		17.6	-4171.85	-2882.22
17.7	-72.5556	-1108.1	-82.48	-1013.82		17.7	-1580.22	-4069.7	-2529		17.7	-48.2916	-837.021		17.7	-872.814	-1225.33		17.7	-1384.72	-3590.87		17.7	-4166.87	-2884.09
17.8	-74.1125	-1088.17	-77.498	-979.568		17.8	-1573.68	-4070.95	-2530.25		17.8	-50.7827	-846.051		17.8	-874.059	-1238.1		17.8	-1328.68	-3627.93		17.8	-4167.18	-2897.79
17.9	-71.9328	-1043.65	-77.498	-937.843		17.9	-1569.95	-4066.59	-2532.74		17.9	-49.2257	-847.919		17.9	-878.73	-1244.32		17.9	-1287.57	-3649.72		17.9	-4170.61	-2923.63
18	-70.9987	-1025.9	-80.3004	-889.89		18	-1567.45	-4048.84	-2531.81		18	-47.3575	-850.099		18	-871.568	-1240.59		18	-1248.65	-3686.78		18	-4161.58	-2918.03
18.1	-71.3101	-1000.05	-76.8752	-855.015		18.1	-1568.7	-4055.07	-2517.48		18.1	-41.7526	-856.638		18.1	-872.502	-1242.46		18.1	-1224.05	-3701.41		18.1	-4161.58	-2898.72
18.2	-64.4597	-967.358	-82.48	-824.189		18.2	-1559.98	-4037.01	-2499.11		18.2	-47.3575	-853.213		18.2	-877.484	-1254.91		18.2	-1204.43	-3711.69		18.2	-4158.77	-2915.22
18.3	-63.2142	-942.136	-79.989	-789.625		18.3	-1546.9	-4020.81	-2487.59		18.3	-45.1778	-853.213		18.3	-883.401	-1268.61		18.3	-1186.37	-3735.04		18.3	-4131.99	-2924.25
18.4	-57.298	-923.142	-81.2345	-757.865		18.4	-1546.59	-4022.99	-2474.2		18.4	-43.3095	-844.806		18.4	-893.053	-1286.67		18.4	-1150.25	-3752.48		18.4	-4119.23	-2910.24
18.5	-58.2321	-915.669	-78.4321	-733.577		18.5	-1540.05	-4017.08	-2456.14		18.5	-43.9323	-850.411		18.5	-897.413	-1301.31		18.5	-1121.3	-3770.23		18.5	-4118.29	-2892.18
18.6	-57.9207	-889.513	-74.0728	-707.11		18.6	-1541.3	-4010.23	-2442.13		18.6	-43.9323	-855.704		18.6	-903.952	-1315.94		18.6	-1104.79	-3782.37		18.6	-4117.98	-2906.82
18.7	-52.0045	-869.584	-67.2224	-675.971		18.7	-1528.22	-4011.78	-2427.49		18.7	-50.1599	-845.117		18.7	-899.281	-1343.66		18.7	-1067.43	-3820.36		18.7	-4109.58	-2908.06
18.8	-53.5614	-851.836	-64.42	-655.42		18.8	-1520.44	-4004.31	-2431.85		18.8	-52.0282	-862.243		18.8	-893.365	-1353.62		18.8	-1023.83	-3843.09		18.8	-4099.3	-2899.34
18.9	-47.9565	-820.075	-67.5338	-630.821		18.9	-1511.41	-3985.32	-2452.09		18.9	-52.0282	-869.093		18.9	-901.772	-1356.42		18.9	-973.39	-3865.2		18.9	-4100.54	-2906.5
19	-48.5793	-797.655	-63.1744	-611.204		19	-1510.16	-3980.33	-2453.96		19	-46.4233	-889.333		19	-903.952	-1375.73		19	-946.923	-3868.31		19	-4092.76	-2905.57
19.1	-46.711	-783.332	-59.1265	-586.294		19.1	-1511.72	-3967.26	-2427.81		19.1	-41.1299	-880.614		19.1	-909.868	-1389.12		19.1	-932.911	-3875.78		19.1	-4088.71	-2899.34
19.2	-42.6631	-773.368	-66.2883	-560.761		19.2	-1506.11	-3956.67	-2438.39		19.2	-44.2437	-871.584		19.2	-907.688	-1387.87		19.2	-897.102	-3894.16		19.2	-4080.93	-2899.97
19.3	-38.9265	-752.194	-67.2224	-534.916		19.3	-1487.74	-3942.97	-2424.07		19.3	-42.064	-869.716		19.3	-906.754	-1404.37		19.3	-855.066	-3907.23		19.3	-4072.83	-2898.72
19.4	-34.5672	-736.936	-65.3541	-514.988		19.4	-1487.43	-3931.76	-2379.85		19.4	-40.1957	-872.83		19.4	-907.066	-1413.4		19.4	-825.796	-3919.69		19.4	-4069.41	-2899.34
19.5	-31.142	-720.744	-71.8931	-487.898		19.5	-1489.61	-3930.82	-2378.3		19.5	-33.3453	-884.351		19.5	-908.934	-1414.03		19.5	-806.49	-3935.57		19.5	-4053.84	-2901.21
19.6	-28.0282	-714.828	-70.959	-470.149		19.6	-1477.15	-3922.42	-2375.18		19.6	-28.986	-891.824		19.6	-911.425	-1423.68		19.6	-780.957	-3949.58		19.6	-4043.87	-2915.22
19.7	-31.142	-707.044	-69.4021	-454.269		19.7	-1468.12	-3906.54	-2361.48		19.7	-29.2974	-866.914		19.7	-920.144	-1437.07		19.7	-775.041	-3956.43		19.7	-4033.91	-2917.09
19.8	-29.8965	-684.313	-63.7972	-433.095		19.8	-1467.5	-3895.64	-2341.24		19.8	-23.6925	-878.746		19.8	-925.748	-1448.28		19.8	-766.011	-3972.31		19.8	-4027.68	-2892.8
19.9	-31.4534	-660.337	-68.1565	-416.903		19.9	-1463.76	-3883.81	-2330.66		19.9	-23.6925	-895.249		19.9	-925.748	-1452.33		19.9	-750.753	-3979.79		19.9	-4001.53	-2879.41
20	-37.9924	-646.013	-67.2224	-405.693		20	-1455.98	-3887.23	-2326.3		20	-20.2674	-898.363		20	-925.126	-1450.15		20	-716.501	-3983.21		20	-3978.48	-2876.61
20.1	-36.1241	-633.869	-64.42	-396.04		20.1	-1455.98	-3874.15	-2324.43		20.1	-27.1177	-889.022		20.1	-934.156	-1460.42		20.1	-704.046	-3990.06		20.1	-3962.29	-2869.76
20.2	-36.1241	-619.234	-62.5517	-381.094		20.2	-1460.03	-3857.34	-2306.68		20.2	-20.8901	-881.86		20.2	-941.006	-1472.26		20.2	-688.789	-4000.65		20.2	-3953.26	-2870.38
20.3	-32.3875	-600.552	-60.0606	-367.393		20.3	-1453.18	-3850.49	-2277.41		20.3	-21.2015	-878.435		20.3	-936.024	-1488.76		20.3	-673.219	-4010.61		20.3	-3954.2	-2878.17
20.4	-25.8485	-585.605	-55.3899	-351.513		20.4	-1446.95	-3842.7	-2252.81		20.4	-19.956	-884.662		20.4	-942.563	-1499.03		20.4	-662.633	-4024		20.4	-3938.94	-2887.51
20.5	-24.9144	-559.449	-57.881	-333.764		20.5	-1456.6	-3826.51	-2237.86		20.5	-19.0218	-886.531		20.5	-938.515	-1497.48		20.5	-624.644	-4019.02		20.5	-3923.06	-2886.26
20.6	-27.7168	-549.174	-54.1444	-316.95		20.6	-1443.21	-3827.13	-2228.21		20.6	-15.908	-885.597		20.6	-933.844	-1501.53		20.6	-602.536	-4002.52		20.6	-3926.17	-2879.73
20.7	-23.0461	-536.096	-55.3899	-310.722		20.7	-1437.3	-3816.24	-2224.79		20.7	-12.4828	-889.022		20.7	-942.563	-1499.66		20.7	-592.883	-3990.68		20.7	-3925.24	-2879.1
20.8	-19.6209	-521.461	-54.4558	-298.89		20.8	-1422.66	-3811.25	-2217.94		20.8	-17.4649	-912.064		20.8	-945.054	-1513.67		20.8	-596.931	-4023.69		20.8	-3913.72	-2881.28
20.9	-21.8006	-510.251	-56.3241	-294.53		20.9	-1426.4	-3804.09	-2218.87		20.9	-15.2853	-915.8		20.9	-946.611	-1533.6		20.9	-594.44	-4042.68		20.9	-3899.7	-2890.94
21	-26.4713	-508.071	-59.7493	-287.368		21	-1412.39	-3772.95	-2223.85		21	-13.7284	-929.19		21	-960.312	-1534.22		21	-586.033	-4054.21		21	-3893.17	-2892.8
21.1	-23.9802	-497.173	-59.4379	-273.356		21.1	-1408.65	-3775.13	-2203.61		21.1	-15.908	-934.172		21.1	-962.491	-1536.4		21.1	-574.2	-4061.37		21.1	-3889.12	-2904.33
21.2	-25.5371	-474.754	-57.881	-264.015		21.2	-1406.78	-3772.33	-2193.96		21.2	-14.9739	-925.142		21.2	-956.264	-1528.93		21.2	-550.847	-4089.7		21.2	-3873.24	-2903.7
21.3	-24.603	-483.472	-63.1744	-263.392		21.3	-1410.21	-3777.31	-2192.09		21.3	-13.7284	-920.783		21.3	-958.132	-1534.84		21.3	-540.26	-4083.48		21.3	-3853	-2893.43
21.4	-20.8664	-481.604	-57.2582	-269.308		21.4	-1400.24	-3762.06	-2197.38		21.4	-13.7284	-920.16		21.4	-943.186	-1551.66		21.4	-542.128	-4079.43		21.4	-3838.05	-2903.39
21.5	-18.9981	-465.101	-57.5696	-266.195		21.5	-1388.41	-3760.5	-2179.32		21.5	-9.05765	-918.603		21.5	-950.659	-1554.15		21.5	-528.739	-4099.98		21.5	-3833.38	-2910.86
21.6	-20.555	-458.873	-51.342	-260.59		21.6	-1391.52	-3746.49	-2146.63		21.6	-8.74627	-918.603		21.6	-950.036	-1566.6		21.6	-517.218	-4103.4		21.6	-3826.22	-2899.34
21.7	-16.8185	-454.514	-51.9647	-255.919		21.7	-1387.79	-3741.19	-2146.01		21.7	-8.12351	-931.992		21.7	-950.659	-1579.68		21.7	-514.415	-4091.57		21.7	-3826.84	-2904.95
21.8	-16.5071	-442.682	-57.881	-248.135		21.8	-1388.1	-3750.85	-2152.55		21.8	-7.81213	-946.627		21.8	-948.791	-1598.99		21.8	-500.092	-4093.13		21.8	-3828.71	-2918.03
21.9	-18.3754	-450.155	-57.5696	-247.823		21.9	-1392.77	-3744.31	-2138.84		21.9	-10.3032	-963.13		21.9	-947.856	-1590.58		21.9	-491.062	-4114.92		21.9	-3839.92	-2926.43
22	-15.8843	-434.274	-55.3899	-244.087		22	-1396.19	-3722.82	-2137.29		22	-7.50075	-983.059		22	-947.545	-1596.19		22	-475.493	-4113.99		22	-3834.31	-2933.28
22.1	-18.064	-417.771	-52.8989	-243.464		22.1	-1385.61	-3723.76	-2142.27		22.1	-7.81213	-965.933		22.1	-940.695	-1610.2		22.1	-465.217	-4098.73		22.1	-3826.22	-2924.88
22.2	-16.5071	-400.022	-54.1444	-240.039		22.2	-1389.03	-3717.84	-2107.71		22.2	-9.68041	-960.016		22.2	-937.581	-1605.84		22.2	-463.972	-4102.47		22.2	-3816.88	-2914.6
22.3	-11.8364	-389.435	-54.4558	-234.434		22.3	-1394.95	-3721.27	-2096.81		22.3	-6.56661	-970.603		22.3	-943.186	-1617.67		22.3	-465.84	-4122.09		22.3	-3805.36	-2913.04
22.4	-9.9681	-392.861	-54.7672	-231.631		22.4	-1389.66	-3705.38	-2099.61		22.4	-7.81213	-987.729		22.4	-933.844	-1618.29		22.4	-461.169	-4119.6		22.4	-3798.19	-2911.8
22.5	-7.47705	-384.142	-58.1924	-229.452		22.5	-1378.45	-3691.68	-2107.4		22.5	-11.5487	-981.502		22.5	-926.994	-1632.62		22.5	-460.235	-4121.15		22.5	-3793.21	-2903.08
22.6	-9.34534	-375.423	-52.8989	-227.583		22.6	-1371.28	-3674.87	-2103.04		22.6	-12.1715	-988.664		22.6	-933.844	-1651.61		22.6	-463.038	-4132.98		22.6	-3774.22	-2896.54
22.7	-11.2136	-375.423	-46.9827	-226.338		22.7	-1364.12	-3650.27	-2075.95		22.7	-11.8601	-980.568		22.7	-937.892	-1648.5		22.7	-461.481	-4126.45		22.7	-3756.78	-2917.09
22.8	-11.525	-367.95	-52.2761	-217.931		22.8	-1364.43	-3641.86	-2067.23		22.8	-11.2373	-977.765		22.8	-932.599	-1659.08		22.8	-456.499	-4133.3		22.8	-3744.01	-2915.85
22.9	-8.4112	-364.525	-60.372	-220.733		22.9	-1352.91	-3633.14	-2072.52		22.9	-11.5487	-1004.54		22.9	-937.581	-1658.77		22.9	-455.876	-4136.72		22.9	-3735.61	-2926.43
23	-9.65672	-363.28	-53.2103	-213.571		23	-1352.6	-3634.08	-2065.36		23	-11.8601	-997.382		23	-925.126	-1661.89		23	-444.977	-4138.28		23	-3727.2	-2931.1
23.1	-11.2136	-361.1	-56.6355	-209.212		23.1	-1364.75	-3620.69	-2050.72		23.1	-6.56661	-992.089		23.1	-912.359	-1659.71		23.1	-424.738	-4150.73		23.1	-3729.69	-2927.37
23.2	-9.03396	-363.591	-56.3241	-202.984		23.2	-1364.12	-3613.53	-2058.2		23.2	-5.63246	-996.137		23.2	-917.03	-1648.19		23.2	-427.229	-4154.78		23.2	-3718.79	-2916.78
23.3	-12.4591	-356.429	-51.9647	-198.936		23.3	-1345.44	-3613.53	-2048.86		23.3	-6.25523	-1006.72		23.3	-912.359	-1658.46		23.3	-430.654	-4165.06		23.3	-3706.03	-2913.67
23.4	-12.1478	-346.776	-54.7672	-199.871		23.4	-1335.79	-3612.9	-2038.27		23.4	-9.36903	-1002.36		23.4	-911.114	-1662.51		23.4	-428.163	-4174.4		23.4	-3700.73	-2927.37
23.5	-8.4112	-339.926	-51.0306	-196.757		23.5	-1340.15	-3592.35	-2020.83		23.5	-6.87799	-994.891		23.5	-916.718	-1674.03		23.5	-416.33	-4189.34		23.5	-3697.31	-2924.56
23.6	-12.4591	-336.189	-55.0786	-199.248		23.6	-1341.39	-3592.04	-2021.77		23.6	-9.68041	-987.729		23.6	-917.964	-1693.34		23.6	-426.295	-4181.25		23.6	-3680.49	-2915.85
23.7	-8.72258	-333.387	-54.7672	-195.823		23.7	-1345.44	-3599.52	-2025.5		23.7	-10.9259	-976.208		23.7	-922.012	-1701.12		23.7	-422.558	-4172.53		23.7	-3663.06	-2915.53
23.8	-10.2795	-330.896	-53.833	-189.284		23.8	-1345.13	-3584.57	-2017.1		23.8	-9.05765	-977.142		23.8	-926.683	-1684.62		23.8	-412.594	-4170.66		23.8	-3664.3	-2927.06
23.9	-14.6388	-330.896	-54.7672	-183.056		23.9	-1328	-3572.74	-2021.45		23.9	-11.8601	-977.142		23.9	-917.03	-1688.35		23.9	-407.612	-4190.9		23.9	-3666.17	-2936.4
24	-12.7705	-319.998	-53.2103	-182.122		24	-1319.91	-3559.35	-2024.88		24	-8.43489	-979.322		24	-920.144	-1691.78		24	-397.959	-4178.76		24	-3650.29	-2946.36
24.1	-13.3933	-302.872	-54.7672	-186.17		24.1	-1314.3	-3558.41	-2014.29		24.1	-11.5487	-975.897		24.1	-927.617	-1697.07		24.1	-403.875	-4181.56		24.1	-3658.7	-2942.62
24.2	-10.2795	-294.153	-52.8989	-184.302		24.2	-1320.84	-3558.72	-1986.58		24.2	-11.2373	-978.388		24.2	-924.192	-1700.19		24.2	-401.696	-4170.35		24.2	-3661.19	-2940.45
24.3	-9.34534	-301.315	-51.6534	-180.254		24.3	-1313.68	-3545.02	-1992.5		24.3	-13.417	-992.711		24.3	-921.078	-1697.38		24.3	-400.139	-4185.61		24.3	-3661.81	-2933.91
24.4	-9.34534	-302.56	-50.4078	-182.122		24.4	-1298.11	-3539.11	-1983.15		24.4	-13.1056	-1002.05		24.4	-922.012	-1700.5		24.4	-388.618	-4203.67		24.4	-3661.19	-2941.38
24.5	-10.2795	-292.285	-54.1444	-179.631		24.5	-1291.57	-3531.01	-1978.8		24.5	-11.5487	-1001.43		24.5	-915.161	-1700.81		24.5	-372.426	-4216.44		24.5	-3667.42	-2951.34
24.6	-8.4112	-281.075	-52.2761	-176.828		24.6	-1289.39	-3531.01	-1969.14		24.6	-11.2373	-1002.99		24.6	-901.461	-1708.59		24.6	-374.605	-4224.53		24.6	-3655.58	-2926.12
24.7	-4.98601	-268.308	-54.1444	-174.026		24.7	-1285.34	-3526.96	-1928.04		24.7	-11.5487	-1001.74		24.7	-901.149	-1716.69		24.7	-364.33	-4241.97		24.7	-3656.21	-2919.27
24.8	-6.85429	-265.195	-53.2103	-173.403		24.8	-1293.44	-3516.69	-1908.11		24.8	-15.2853	-1008.28		24.8	-900.838	-1710.46		24.8	-351.252	-4240.41		24.8	-3645.93	-2925.81
24.9	-8.72258	-257.721	-58.1924	-170.912		24.9	-1289.08	-3507.66	-1919.32		24.9	-16.5308	-1019.8		24.9	-893.365	-1708.28		24.9	-349.695	-4253.18		24.9	-3636.28	-2918.34
25	-7.47705	-254.296	-56.9468	-165.93		25	-1290.01	-3510.15	-1898.15		25	-14.9739	-1009.53		25	-886.514	-1708.59		25	-346.27	-4236.67		25	-3629.43	-2906.5
25.1	-4.67463	-263.326	-54.4558	-157.834		25.1	-1280.05	-3501.12	-1888.81		25.1	-15.908	-992.711		25.1	-885.58	-1697.38		25.1	-345.024	-4232		25.1	-3622.58	-2904.33
25.2	-4.05187	-271.422	-58.5037	-156.589		25.2	-1267.91	-3489.6	-1877.91		25.2	-15.2853	-995.514		25.2	-890.562	-1692.4		25.2	-341.599	-4233.56		25.2	-3603.27	-2906.5
25.3	-4.67463	-275.159	-56.3241	-157.211		25.3	-1264.48	-3474.34	-1885.07		25.3	-15.5966	-1002.99		25.3	-897.724	-1688.67		25.3	-345.647	-4208.96		25.3	-3591.44	-2906.19
25.4	-6.23153	-265.195	-51.0306	-154.098		25.4	-1272.27	-3464.06	-1880.09		25.4	-19.0218	-985.861		25.4	-906.443	-1689.29		25.4	-338.797	-4212.7		25.4	-3588.32	-2912.73
25.5	-6.23153	-254.919	-52.5875	-151.918		25.5	-1261.06	-3466.87	-1863.9		25.5	-15.908	-1002.05		25.5	-894.922	-1706.1		25.5	-329.144	-4220.17		25.5	-3590.82	-2931.1
25.6	-9.34534	-262.392	-51.9647	-156.9		25.6	-1246.42	-3469.67	-1875.42		25.6	-12.4828	-999.562		25.6	-889.317	-1716.07		25.6	-316.689	-4209.58		25.6	-3581.16	-2933.59
25.7	-9.9681	-259.59	-54.1444	-155.966		25.7	-1249.85	-3464.38	-1871.37		25.7	-10.3032	-1010.46		25.7	-889.005	-1716.07		25.7	-318.557	-4226.4		25.7	-3559.68	-2929.24
25.8	-9.9681	-255.542	-50.7192	-158.768		25.8	-1245.8	-3459.71	-1864.21		25.8	-13.7284	-1028.52		25.8	-891.808	-1701.43		25.8	-324.473	-4230.45		25.8	-3551.27	-2920.21
25.9	-6.85429	-244.643	-51.9647	-150.672		25.9	-1232.72	-3449.74	-1854.55		25.9	-17.4649	-1012.64		25.9	-887.137	-1712.02		25.9	-325.407	-4227.96		25.9	-3546.29	-2924.25
26	-11.525	-237.17	-52.2761	-139.463		26	-1232.1	-3427.01	-1857.05		26	-15.908	-1007.03		26	-879.041	-1711.08		26	-326.964	-4217.37		26	-3545.67	-2935.77
26.1	-13.3933	-240.907	-52.2761	-140.708		26.1	-1242.06	-3402.72	-1864.83		26.1	-18.0877	-1015.75		26.1	-872.191	-1707.35		26.1	-333.192	-4247.88		26.1	-3549.71	-2928.92
26.2	-8.72258	-246.512	-51.342	-141.954		26.2	-1255.14	-3401.79	-1861.4		26.2	-18.7104	-1020.42		26.2	-884.023	-1708.28		26.2	-332.258	-4257.54		26.2	-3539.44	-2924.88
26.3	-8.72258	-245.578	-60.0606	-140.397		26.3	-1247.98	-3417.67	-1856.73		26.3	-15.908	-1032.88		26.3	-880.91	-1713.89		26.3	-323.228	-4246.95		26.3	-3530.41	-2923.32
26.4	-8.4112	-254.296	-56.3241	-140.085		26.4	-1226.18	-3417.36	-1837.12		26.4	-18.0877	-1042.84		26.4	-880.287	-1716.38		26.4	-319.18	-4249.75		26.4	-3522.62	-2931.42
26.5	-9.03396	-254.608	-56.3241	-143.511		26.5	-1231.47	-3414.87	-1807.54		26.5	-17.4649	-1036.62		26.5	-869.389	-1727.28		26.5	-319.18	-4248.2		26.5	-3522	-2923.01
26.6	-9.9681	-247.757	-57.2582	-141.954		26.6	-1224	-3414.87	-1791.97		26.6	-12.7942	-1017.93		26.6	-868.766	-1726.34		26.6	-316.377	-4251.62		26.6	-3509.86	-2914.91
26.7	-14.016	-235.302	-56.0127	-138.529		26.7	-1209.37	-3403.35	-1784.49		26.7	-16.2194	-1022.92		26.7	-875.616	-1727.28		26.7	-307.659	-4249.75		26.7	-3512.04	-2936.09
26.8	-10.2795	-234.991	-56.3241	-141.331		26.8	-1206.88	-3394.63	-1782.94		26.8	-14.9739	-1018.56		26.8	-866.586	-1736.93		26.8	-305.479	-4228.89		26.8	-3504.56	-2948.54
26.9	-13.7047	-228.763	-60.0606	-139.463		26.9	-1209.68	-3401.79	-1786.36		26.9	-14.6625	-1028.52		26.9	-861.604	-1731.64		26.9	-295.203	-4233.25		26.9	-3502.38	-2940.76
27	-14.016	-220.044	-53.5216	-138.84		27	-1204.07	-3410.82	-1780.45		27	-18.3991	-1036.93		27	-866.586	-1726.34		27	-296.449	-4246.02		27	-3507.37	-2935.15
27.1	-11.8364	-214.751	-53.833	-128.876		27.1	-1210.3	-3394.63	-1768.3		27.1	-18.7104	-1035.68		27.1	-860.67	-1724.47		27.1	-300.808	-4248.51		27.1	-3509.54	-2926.74
27.2	-8.72258	-213.505	-52.5875	-123.894		27.2	-1216.22	-3379.99	-1762.39		27.2	-17.4649	-1044.09		27.2	-853.197	-1722.29		27.2	-297.694	-4268.75		27.2	-3502.07	-2907.75
27.3	-5.92015	-209.769	-54.4558	-124.828		27.3	-1217.15	-3379.68	-1759.89		27.3	-14.9739	-1049.69		27.3	-851.951	-1730.08		27.3	-296.449	-4295.84		27.3	-3502.69	-2925.81
27.4	-10.5909	-219.733	-57.2582	-117.355		27.4	-1203.76	-3371.9	-1743.7		27.4	-19.0218	-1045.33		27.4	-857.245	-1725.41		27.4	-303.922	-4299.26		27.4	-3496.47	-2930.79
27.5	-8.09982	-215.685	-58.1924	-112.373		27.5	-1188.19	-3369.09	-1733.43		27.5	-19.956	-1031.63		27.5	-861.604	-1734.13		27.5	-304.545	-4257.54		27.5	-3482.77	-2927.06
27.6	-11.8364	-211.326	-54.4558	-112.995		27.6	-1188.82	-3361.62	-1732.8		27.6	-21.5129	-1031.01		27.6	-862.538	-1742.85		27.6	-297.072	-4252.56		27.6	-3480.9	-2929.86
27.7	-8.4112	-215.374	-54.1444	-111.75		27.7	-1192.86	-3350.72	-1730.94		27.7	-18.0877	-1035.06		27.7	-858.49	-1740.67		27.7	-289.599	-4277.78		27.7	-3477.78	-2934.84
27.8	-9.65672	-220.044	-53.833	-111.127		27.8	-1192.86	-3355.39	-1728.13		27.8	-13.7284	-1041.91		27.8	-857.245	-1746.58		27.8	-297.383	-4277.15		27.8	-3480.59	-2940.13
27.9	-12.4591	-216.619	-55.0786	-109.882		27.9	-1195.35	-3350.41	-1715.37		27.9	-16.8422	-1049.38		27.9	-853.82	-1735.68		27.9	-308.593	-4274.66		27.9	-3484.01	-2938.58
28	-5.29739	-208.523	-52.2761	-107.079		28	-1189.44	-3348.23	-1701.04		28	-20.2674	-1037.24		28	-852.885	-1735.37		28	-293.335	-4264.39		28	-3472.49	-2930.48
28.1	-7.47705	-205.098	-57.881	-107.079		28.1	-1192.55	-3335.78	-1710.7		28.1	-18.0877	-1030.08		28.1	-861.915	-1729.46		28.1	-282.437	-4264.7		28.1	-3462.22	-2928.3
28.2	-4.36325	-204.164	-55.7013	-99.9174		28.2	-1196.91	-3323.63	-1727.82		28.2	-14.6625	-1039.11		28.2	-860.359	-1736.62		28.2	-283.371	-4249.13		28.2	-3456.3	-2924.25
28.3	-4.05187	-199.805	-56.0127	-98.3605		28.3	-1190.68	-3320.52	-1718.17		28.3	-18.3991	-1043.16		28.3	-848.526	-1741.29		28.3	-291.778	-4269.68		28.3	-3461.9	-2924.88
28.4	-6.85429	-203.853	-50.4078	-99.9174		28.4	-1185.08	-3326.75	-1704.47		28.4	-17.4649	-1040.04		28.4	-844.167	-1734.13		28.4	-301.742	-4279.33		28.4	-3461.59	-2933.91
28.5	-1.56082	-208.835	-50.0965	-98.6718		28.5	-1182.59	-3318.03	-1700.73		28.5	-15.2853	-1032.88		28.5	-840.119	-1749.7		28.5	-303.611	-4275.91		28.5	-3458.48	-2934.22
28.6	-6.23153	-201.673	-50.7192	-108.947		28.6	-1189.13	-3310.24	-1681.74		28.6	-14.9739	-1026.65		28.6	-842.921	-1759.35		28.6	-289.599	-4268.44		28.6	-3438.24	-2936.09
28.7	-5.60877	-197.625	-55.0786	-107.079		28.7	-1187.57	-3310.55	-1677.07		28.7	-12.4828	-1029.14		28.7	-840.43	-1748.45		28.7	-274.652	-4272.79		28.7	-3427.03	-2946.05
28.8	-4.98601	-192.643	-51.9647	-108.325		28.8	-1188.5	-3306.51	-1670.84		28.8	-14.0397	-1041.6		28.8	-848.215	-1734.44		28.8	-266.556	-4269.68		28.8	-3413.33	-2957.26
28.9	-9.03396	-199.805	-51.0306	-114.552		28.9	-1179.79	-3298.1	-1692.01		28.9	-12.4828	-1049.69		28.9	-851.017	-1737.86		28.9	-275.586	-4263.45		28.9	-3406.48	-2942
29	-8.72258	-200.739	-54.1444	-112.684		29	-1184.14	-3297.79	-1672.09		29	-12.4828	-1050.63		29	-837.939	-1727.9		29	-283.994	-4273.73		29	-3397.45	-2954.15
29.1	-6.85429	-194.511	-52.5875	-113.618		29.1	-1177.92	-3286.89	-1657.76		29.1	-16.2194	-1056.54		29.1	-833.891	-1739.11		29.1	-282.125	-4286.81		29.1	-3402.12	-2953.52
29.2	-4.36325	-195.757	-57.5696	-112.684		29.2	-1166.71	-3284.71	-1665.86		29.2	-16.8422	-1060.28		29.2	-833.268	-1746.89		29.2	-272.784	-4303		29.2	-3406.79	-2945.12
29.3	-3.42911	-198.248	-62.8631	-107.079		29.3	-1163.59	-3285.33	-1668.97		29.3	-16.8422	-1056.23		29.3	-830.155	-1742.85		29.3	-278.7	-4296.77		29.3	-3405.86	-2918.03
29.4	-6.23153	-194.511	-56.3241	-109.57		29.4	-1174.8	-3268.52	-1678.94		29.4	-16.5308	-1048.76		29.4	-829.22	-1748.14		29.4	-291.467	-4271.55		29.4	-3399.94	-2927.37
29.5	-2.80635	-203.541	-51.342	-115.798		29.5	-1177.29	-3258.55	-1659.63		29.5	-15.908	-1051.87		29.5	-827.352	-1769.31		29.5	-289.91	-4282.76		29.5	-3398.69	-2941.38
29.6	-6.23153	-198.248	-58.5037	-115.798		29.6	-1173.25	-3252.01	-1649.98		29.6	-13.417	-1036.62		29.6	-826.729	-1759.04		29.6	-283.371	-4320.75		29.6	-3396.83	-2941.07
29.7	-8.09982	-208.835	-56.3241	-114.552		29.7	-1167.02	-3250.15	-1651.85		29.7	-13.417	-1036.93		29.7	-823.927	-1752.81		29.7	-280.569	-4336.01		29.7	-3394.65	-2928.3
29.8	-6.54291	-193.266	-56.6355	-111.75		29.8	-1162.35	-3246.72	-1629.43		29.8	-11.5487	-1043.16		29.8	-825.172	-1747.83		29.8	-283.994	-4312.34		29.8	-3391.84	-2926.43
29.9	-8.4112	-187.038	-54.1444	-114.552		29.9	-1157.37	-3249.21	-1648.73		29.9	-12.7942	-1042.84		29.9	-827.352	-1752.5		29.9	-289.91	-4291.79		29.9	-3395.89	-2940.13
30	-7.16568	-192.954	-56.3241	-113.307		30	-1156.74	-3238.62	-1659.32		30	-15.908	-1032.57		30	-830.466	-1766.82		30	-280.88	-4295.21		30	-3392.15	-2926.43
30.1	-3.74049	-192.02	-53.833	-119.846		30.1	-1149.58	-3235.82	-1654.96		30.1	-9.05765	-1024.47		30.1	-834.514	-1776.47		30.1	-272.473	-4309.85		30.1	-3385.93	-2910.55
30.2	-6.23153	-196.068	-54.7672	-117.666		30.2	-1155.19	-3235.82	-1645.62		30.2	-14.6625	-1027.59		30.2	-823.304	-1775.54		30.2	-262.82	-4314.83		30.2	-3380.32	-2915.22
30.3	-3.74049	-200.427	-57.881	-117.355		30.3	-1154.87	-3236.76	-1635.97		30.3	-14.3511	-1027.9		30.3	-816.454	-1776.16		30.3	-254.724	-4325.42		30.3	-3376.59	-2912.42
30.4	-0.62668	-205.41	-60.9948	-119.534		30.4	-1152.38	-3227.42	-1624.76		30.4	-15.5966	-1029.45		30.4	-812.406	-1782.08		30.4	-260.017	-4314.21		30.4	-3372.85	-2916.16
30.5	-4.36325	-205.41	-60.0606	-119.534		30.5	-1145.22	-3227.73	-1613.55		30.5	-19.3332	-1037.86		30.5	-816.454	-1807.3		30.5	-269.982	-4306.11		30.5	-3370.98	-2899.03
30.6	-1.56082	-201.362	-58.8151	-110.816		30.6	-1153.94	-3223.37	-1619.15		30.6	-21.2015	-1035.99		30.6	-813.34	-1810.41		30.6	-269.67	-4322.62		30.6	-3368.18	-2891.25
30.7	-2.80635	-197.314	-58.1924	-114.552		30.7	-1151.45	-3216.52	-1631.29		30.7	-21.2015	-1031.01		30.7	-811.472	-1802.63		30.7	-267.491	-4301.13		30.7	-3360.39	-2890.94
30.8	1.86436	-197.936	-55.7013	-116.109		30.8	-1154.87	-3216.52	-1645		30.8	-20.8901	-1010.15		30.8	-814.586	-1802.32		30.8	-260.329	-4287.43		30.8	-3348.87	-2895.61
30.9	-2.80635	-196.691	-51.9647	-118.289		30.9	-1147.09	-3201.57	-1639.08		30.9	-20.5787	-995.514		30.9	-808.669	-1803.25		30.9	-247.562	-4274.97		30.9	-3348.56	-2901.21
31	-3.11773	-187.038	-51.342	-125.139		31	-1134.64	-3184.13	-1601.4		31	-15.2853	-990.843		31	-803.376	-1794.22		31	-245.382	-4266.88		31	-3342.33	-2897.79
31.1	-4.36325	-184.547	-51.6534	-121.091		31.1	-1130.9	-3170.12	-1581.16		31.1	-16.8422	-1002.99		31.1	-803.687	-1784.26		31.1	-256.592	-4267.5		31.1	-3345.76	-2900.59
31.2	-5.29739	-185.17	-46.6713	-117.666		31.2	-1123.43	-3181.02	-1593.62		31.2	-15.5966	-990.22		31.2	-794.034	-1785.82		31.2	-250.676	-4275.29		31.2	-3338.6	-2897.16
31.3	-5.29739	-178.319	-47.9168	-111.127		31.3	-1129.03	-3170.12	-1608.25		31.3	-14.0397	-987.418		31.3	-787.807	-1797.65		31.3	-250.676	-4260.03		31.3	-3334.24	-2902.15
31.4	-1.8722	-181.433	-47.294	-111.127		31.4	-1141.49	-3168.25	-1599.53		31.4	-14.0397	-982.125		31.4	-790.921	-1797.65		31.4	-257.215	-4268.75		31.4	-3328.94	-2903.08
31.5	-2.80635	-188.284	-48.8509	-104.277		31.5	-1135.57	-3167.32	-1581.79		31.5	-13.1056	-967.178		31.5	-782.825	-1793.91		31.5	-254.413	-4272.79		31.5	-3324.58	-2898.1
31.6	-2.80635	-190.152	-46.9827	-105.834		31.6	-1134.64	-3166.38	-1579.61		31.6	-14.3511	-964.999		31.6	-779.4	-1782.39		31.6	-249.43	-4286.81		31.6	-3315.55	-2894.67
31.7	-7.78844	-184.547	-47.6054	-109.882		31.7	-1126.23	-3163.89	-1559.05		31.7	-16.2194	-958.148		31.7	-786.561	-1791.42		31.7	-246.317	-4320.44		31.7	-3312.44	-2898.41
31.8	-9.34534	-187.038	-48.8509	-103.654		31.8	-1120.93	-3156.73	-1569.02		31.8	-18.0877	-970.915		31.8	-788.741	-1790.18		31.8	-246.628	-4307.98		31.8	-3302.48	-2898.72
31.9	-7.16568	-187.349	-47.294	-102.097		31.9	-1115.02	-3151.44	-1583.34		31.9	-14.3511	-987.418		31.9	-787.807	-1785.82		31.9	-245.382	-4294.59		31.9	-3299.67	-2887.82
32	-7.78844	-182.056	-43.8688	-100.54		32	-1109.72	-3149.57	-1577.43		32	-10.6146	-992.711		32	-777.22	-1773.67		32	-239.466	-4287.43		32	-3293.45	-2897.16
32.1	-3.74049	-181.745	-49.1623	-102.097		32.1	-1108.17	-3157.35	-1574.62		32.1	-13.417	-990.532		32.1	-769.124	-1781.46		32.1	-232.616	-4309.23		32.1	-3287.53	-2916.47
32.2	-3.11773	-186.727	-47.9168	-101.786		32.2	-1109.72	-3160.78	-1582.1		32.2	-13.417	-986.484		32.2	-773.795	-1778.97		32.2	-242.891	-4307.36		32.2	-3280.06	-2918.03
32.3	-3.74049	-191.397	-46.9827	-102.097		32.3	-1098.52	-3164.21	-1576.49		32.3	-16.2194	-978.699		32.3	-774.729	-1789.86		32.3	-238.221	-4305.18		32.3	-3280.06	-2924.56
32.4	-4.36325	-187.972	-49.4737	-104.899		32.4	-1093.22	-3160.78	-1580.23		32.4	-12.4828	-979.945		32.4	-780.645	-1804.5		32.4	-227.945	-4305.8		32.4	-3276.32	-2924.25
32.5	-3.11773	-187.349	-49.7851	-107.39		32.5	-1102.25	-3157.67	-1562.48		32.5	-13.7284	-995.203		32.5	-779.088	-1807.92		32.5	-235.73	-4304.24		32.5	-3267.29	-2916.47
32.6	-4.98601	-178.942	-48.2282	-103.965		32.6	-1096.65	-3154.86	-1559.37		32.6	-10.9259	-980.256		32.6	-781.268	-1796.09		32.6	-237.598	-4320.44		32.6	-3268.22	-2918.96
32.7	-7.47705	-182.99	-51.0306	-105.211		32.7	-1088.86	-3141.16	-1566.53		32.7	-10.3032	-975.586		32.7	-778.777	-1779.59		32.7	-234.173	-4319.81		32.7	-3261.69	-2919.89
32.8	-6.23153	-189.218	-50.4078	-98.9832		32.8	-1094.47	-3136.8	-1573.38		32.8	-17.4649	-971.849		32.8	-773.795	-1767.76		32.8	-238.532	-4312.65		32.8	-3262	-2920.52
32.9	-8.09982	-182.679	-47.6054	-109.259		32.9	-1098.2	-3130.89	-1565.28		32.9	-16.5308	-981.502		32.9	-779.088	-1775.54		32.9	-239.155	-4320.75		32.9	-3265.11	-2905.88
33	-8.09982	-178.008	-49.7851	-107.39		33	-1091.35	-3118.74	-1568.4		33	-14.9739	-989.909		33	-784.693	-1781.46		33	-239.466	-4318.57		33	-3258.88	-2909.93
33.1	-4.05187	-178.631	-51.6534	-106.145		33.1	-1093.84	-3122.48	-1579.92		33.1	-14.0397	-973.717		33.1	-780.645	-1794.85		33.1	-241.957	-4340.68		33.1	-3238.33	-2905.26
33.2	-5.60877	-170.846	-46.9827	-112.684		33.2	-1089.8	-3119.68	-1569.33		33.2	-16.2194	-979.945		33.2	-784.693	-1789.24		33.2	-230.748	-4327.6		33.2	-3225.25	-2894.67
33.3	-4.36325	-170.846	-39.5095	-108.947		33.3	-1085.13	-3112.52	-1571.51		33.3	-15.2853	-983.37		33.3	-775.663	-1791.73		33.3	-236.041	-4326.04		33.3	-3219.65	-2894.98
33.4	-4.05187	-167.11	-43.5575	-103.965		33.4	-1087.31	-3115.63	-1564.97		33.4	-13.1056	-988.352		33.4	-770.992	-1786.44		33.4	-237.287	-4327.29		33.4	-3217.47	-2888.76
33.5	0.618841	-159.948	-49.4737	-102.097		33.5	-1088.86	-3113.76	-1556.56		33.5	-15.908	-1019.8		33.5	-766.01	-1790.18		33.5	-227.011	-4326.35		33.5	-3219.03	-2892.8
33.6	-3.74049	-158.08	-46.3599	-104.588		33.6	-1076.41	-3117.5	-1560.3		33.6	-16.8422	-1022.92		33.6	-753.866	-1790.8		33.6	-226.077	-4307.67		33.6	-3212.8	-2886.26
33.7	-6.54291	-156.211	-42.3119	-104.277		33.7	-1067.38	-3117.5	-1562.17		33.7	-13.1056	-1029.45		33.7	-743.902	-1775.85		33.7	-225.766	-4326.98		33.7	-3219.96	-2881.28
33.8	-4.67463	-153.098	-41.0664	-100.54		33.8	-1063.95	-3094.14	-1557.81		33.8	-13.1056	-1035.99		33.8	-739.543	-1776.47		33.8	-231.059	-4330.09		33.8	-3212.49	-2886.26
33.9	-1.8722	-155.589	-43.8688	-96.4922		33.9	-1077.96	-3085.43	-1548.16		33.9	-14.3511	-1024.78		33.9	-739.854	-1777.1		33.9	-234.484	-4303		33.9	-3210.62	-2892.8
34	-0.938061	-156.211	-45.1144	-94.3125		34	-1086.68	-3096.64	-1532.59		34	-15.2853	-1010.46		34	-736.118	-1784.88		34	-227.322	-4300.2		34	-3211.24	-2893.74
34.1	-3.74049	-155.9	-43.5575	-98.3605		34.1	-1069.87	-3095.39	-1536.01		34.1	-14.0397	-1015.44		34.1	-743.591	-1806.06		34.1	-217.981	-4316.08		34.1	-3207.51	-2892.8
34.2	-0.62668	-155.277	-45.1144	-100.229		34.2	-1074.54	-3079.51	-1518.89		34.2	-15.5966	-1030.39		34.2	-752.621	-1782.39		34.2	-217.67	-4305.8		34.2	-3207.19	-2886.89
34.3	-1.56082	-156.834	-42.3119	-101.786		34.3	-1080.77	-3077.64	-1498.65		34.3	-16.2194	-1027.59		34.3	-747.327	-1776.79		34.3	-235.73	-4309.23		34.3	-3187.89	-2882.84
34.4	-1.8722	-154.032	-46.3599	-102.097		34.4	-1078.28	-3081.69	-1523.56		34.4	-15.5966	-1013.57		34.4	-740.788	-1790.18		34.4	-241.023	-4327.6		34.4	-3179.17	-2886.26
34.5	-1.56082	-159.948	-38.5754	-98.6718		34.5	-1071.74	-3080.76	-1522.62		34.5	-14.3511	-1013.26		34.5	-733.938	-1796.09		34.5	-231.059	-4328.22		34.5	-3186.64	-2893.74
34.6	-3.11773	-161.816	-41.6892	-95.558		34.6	-1064.26	-3082	-1493.04		34.6	-13.1056	-999.25		34.6	-723.662	-1812.59		34.6	-222.652	-4326.98		34.6	-3183.53	-2908.68
34.7	-0.3153	-168.044	-43.5575	-94.3125		34.7	-1068.93	-3073.59	-1493.66		34.7	-11.2373	-1012.95		34.7	-716.189	-1821.62		34.7	-215.801	-4321.68		34.7	-3171.7	-2910.86
34.8	-2.18358	-163.996	-42.3119	-96.1808		34.8	-1073.92	-3063.94	-1493.35		34.8	-12.7942	-1019.8		34.8	-709.339	-1816.64		34.8	-216.735	-4320.12		34.8	-3148.97	-2907.13
34.9	-2.80635	-163.062	-37.9526	-98.6718		34.9	-1070.18	-3049.31	-1488.06		34.9	-9.36903	-1009.21		34.9	-709.65	-1811.35		34.9	-214.244	-4306.42		34.9	-3146.16	-2898.72
35	-4.67463	-172.092	-40.4437	-97.4263		35	-1063.64	-3049.62	-1481.52		35	-12.1715	-998.005		35	-712.453	-1798.89		35	-224.831	-4293.03		35	-3151.46	-2906.5
35.1	-6.85429	-173.649	-34.216	-100.229		35.1	-1058.04	-3062.38	-1494.29		35.1	-12.7942	-1003.92		35.1	-707.471	-1786.13		35.1	-232.616	-4298.02		35.1	-3153.95	-2904.64
35.2	-4.05187	-170.224	-39.5095	-95.2467		35.2	-1048.38	-3065.81	-1502.38		35.2	-10.6146	-983.059		35.2	-709.962	-1792.35		35.2	-226.077	-4297.39		35.2	-3158.31	-2885.33
35.3	-2.49496	-168.667	-40.1323	-95.8694		35.3	-1048.07	-3074.53	-1503.01		35.3	-12.1715	-973.717		35.3	-716.189	-1794.53		35.3	-212.999	-4299.26		35.3	-3158.31	-2879.41
35.4	-7.78844	-170.535	-38.8868	-96.4922		35.4	-1044.33	-3072.04	-1508.61		35.4	-11.2373	-984.304		35.4	-705.914	-1806.68		35.4	-209.885	-4298.64		35.4	-3156.13	-2898.41
35.5	-2.80635	-165.553	-38.8868	-96.1808		35.5	-1044.96	-3065.81	-1500.51		35.5	-10.6146	-985.55		35.5	-690.033	-1818.82		35.5	-214.244	-4310.47		35.5	-3146.79	-2901.83
35.6	-3.74049	-157.146	-36.7071	-89.019		35.6	-1048.07	-3056.78	-1478.72		35.6	-12.4828	-984.927		35.6	-697.195	-1814.15		35.6	-221.095	-4312.65		35.6	-3145.23	-2892.8
35.7	-4.36325	-161.816	-41.3778	-83.7256		35.7	-1044.33	-3050.86	-1470.31		35.7	-13.1056	-985.238		35.7	-704.668	-1806.99		35.7	-225.766	-4302.69		35.7	-3140.87	-2899.03
35.8	-6.85429	-161.193	-37.9526	-86.528		35.8	-1037.48	-3036.23	-1477.47		35.8	-11.5487	-985.861		35.8	-710.896	-1813.84		35.8	-227.634	-4298.64		35.8	-3139.94	-2906.82
35.9	-11.525	-165.553	-37.0185	-94.6239		35.9	-1043.4	-3039.03	-1473.74		35.9	-8.12351	-990.22		35.9	-699.997	-1793.6		35.9	-232.616	-4305.8		35.9	-3133.09	-2898.1
36	-5.29739	-169.289	-37.0185	-98.0491		36	-1052.12	-3046.81	-1456.92		36	-12.1715	-994.58		36	-693.147	-1803.56		36	-234.173	-4322.93		36	-3141.49	-2900.59
36.1	-10.9022	-170.224	-36.0843	-97.1149		36.1	-1056.17	-3049.31	-1446.96		36.1	-13.417	-1001.12		36.1	-686.919	-1828.79		36.1	-239.466	-4330.71		36.1	-3142.74	-2916.47
36.2	-9.65672	-170.224	-33.5933	-92.4442		36.2	-1062.71	-3051.49	-1442.91		36.2	-10.9259	-995.514		36.2	-684.74	-1818.51		36.2	-227.011	-4326.98		36.2	-3143.05	-2918.03
36.3	-7.78844	-166.798	-34.5274	-95.2467		36.3	-1051.19	-3041.21	-1438.55		36.3	-8.74627	-995.203		36.3	-679.758	-1802.94		36.3	-223.274	-4326.98		36.3	-3149.59	-2902.77
36.4	-9.34534	-165.864	-40.4437	-94.9353		36.4	-1044.02	-3026.57	-1441.98		36.4	-8.43489	-994.58		36.4	-677.889	-1799.83		36.4	-227.322	-4343.17		36.4	-3135.58	-2914.29
36.5	-7.78844	-170.224	-40.4437	-93.067		36.5	-1049.63	-3015.37	-1453.81		36.5	-13.1056	-995.825		36.5	-679.446	-1791.73		36.5	-224.209	-4336.01		36.5	-3130.28	-2919.89
36.6	-5.29739	-172.715	-34.5274	-95.8694		36.6	-1049.01	-3010.38	-1460.35		36.6	-10.6146	-985.238		36.6	-679.135	-1789.24		36.6	-220.161	-4332.89		36.6	-3139.31	-2901.83
36.7	-8.09982	-172.092	-32.3478	-99.606		36.7	-1053.99	-3019.41	-1450.69		36.7	-8.12351	-980.879		36.7	-667.302	-1801.7		36.7	-224.209	-4346.59		36.7	-3140.56	-2886.89
36.8	-7.78844	-172.403	-33.9047	-97.4263		36.8	-1057.1	-3015.37	-1435.44		36.8	-8.43489	-980.879		36.8	-665.123	-1798.58		36.8	-219.538	-4359.05		36.8	-3115.34	-2886.89
36.9	-4.98601	-170.535	-28.9226	-89.3304		36.9	-1050.87	-3005.4	-1439.17		36.9	-8.74627	-992.089		36.9	-674.464	-1803.56		36.9	-207.083	-4340.68		36.9	-3103.82	-2901.21
37	-5.92015	-181.433	-32.3478	-84.6597		37	-1041.22	-3002.91	-1421.42		37	-8.12351	-989.286		37	-664.811	-1801.07		37	-199.61	-4338.81		37	-3101.95	-2894.98
37.1	-6.23153	-181.433	-27.0543	-80.9231		37.1	-1034.68	-3001.98	-1422.05		37.1	-11.2373	-995.514		37.1	-657.961	-1807.3		37.1	-199.298	-4346.28		37.1	-3100.39	-2894.36
37.2	-7.47705	-173.026	-35.1502	-81.2345		37.2	-1033.13	-2991.39	-1421.11		37.2	-10.6146	-982.125		37.2	-653.29	-1805.74		37.2	-207.705	-4361.23		37.2	-3096.03	-2890
37.3	-5.92015	-168.667	-31.725	-82.7914		37.3	-1046.51	-2996.99	-1419.87		37.3	-8.74627	-984.304		37.3	-654.536	-1797.34		37.3	-209.885	-4356.56		37.3	-3081.71	-2900.9
37.4	-8.09982	-168.667	-31.725	-86.528		37.4	-1044.96	-2991.7	-1421.74		37.4	-7.18937	-988.975		37.4	-665.123	-1787.06		37.4	-201.478	-4327.29		37.4	-3064.89	-2888.13
37.5	-5.92015	-162.75	-32.0364	-91.1987		37.5	-1036.55	-3005.4	-1422.05		37.5	-7.81213	-993.023		37.5	-672.907	-1782.39		37.5	-204.592	-4313.27		37.5	-3083.58	-2885.95
37.6	-9.34534	-157.768	-35.773	-86.8394		37.6	-1026.27	-3010.69	-1421.42		37.6	-7.81213	-990.532		37.6	-681.003	-1773.36		37.6	-209.262	-4327.6		37.6	-3096.97	-2889.38
37.7	-11.8364	-152.163	-36.0843	-86.8394		37.7	-1026.9	-3013.19	-1408.03		37.7	-6.56661	-1004.54		37.7	-672.285	-1775.23		37.7	-201.789	-4338.5		37.7	-3086.07	-2890
37.8	-8.72258	-155.9	-38.8868	-81.8573		37.8	-1022.85	-3010.07	-1414.57		37.8	-8.12351	-1007.97		37.8	-669.171	-1782.7		37.8	-203.035	-4337.25		37.8	-3077.97	-2876.92
37.9	-11.2136	-152.786	-34.216	-84.9711		37.9	-1028.14	-2980.8	-1410.21		37.9	-8.74627	-989.598		37.9	-665.123	-1787.06		37.9	-207.394	-4330.4		37.9	-3066.76	-2867.27
38	-8.72258	-144.068	-33.9047	-87.1508		38	-1024.1	-2969.9	-1409.28		38	-11.5487	-979.633		38	-659.829	-1789.24		38	-205.837	-4321.06		38	-3059.6	-2870.38
38.1	-9.65672	-142.511	-36.0843	-86.2166		38.1	-1016.31	-2973.33	-1413.95		38.1	-8.43489	-974.651		38.1	-660.763	-1797.03		38.1	-210.819	-4326.35		38.1	-3057.73	-2880.04
38.2	-9.03396	-145.936	-30.1681	-89.019		38.2	-1013.51	-2970.22	-1403.99		38.2	-7.18937	-968.424		38.2	-658.584	-1796.4		38.2	-212.065	-4340.36		38.2	-3065.83	-2880.04
38.3	-9.34534	-146.87	-32.0364	-85.2825		38.3	-1015.07	-2972.08	-1401.81		38.3	-5.63246	-971.849		38.3	-650.488	-1791.11		38.3	-205.214	-4354.69		38.3	-3060.85	-2890
38.4	-10.2795	-138.774	-32.0364	-80.3004		38.4	-1016	-2965.86	-1413.02		38.4	-4.38694	-964.064		38.4	-644.883	-1785.19		38.4	-195.873	-4363.1		38.4	-3045.28	-2894.36
38.5	-7.47705	-138.151	-34.8388	-83.4142		38.5	-1006.35	-2965.23	-1416.75		38.5	-9.36903	-973.717		38.5	-652.045	-1791.11		38.5	-199.921	-4378.35		38.5	-3037.18	-2893.12
38.6	-7.47705	-144.379	-37.9526	-78.7435		38.6	-1010.39	-2965.54	-1415.82		38.6	-8.43489	-977.142		38.6	-649.242	-1791.42		38.6	-205.214	-4384.89		38.6	-3043.1	-2884.71
38.7	-7.16568	-139.708	-31.725	-82.48		38.7	-1011.95	-2978.62	-1394.96		38.7	-5.0097	-980.879		38.7	-648.308	-1787.37		38.7	-202.101	-4371.19		38.7	-3051.5	-2881.28
38.8	-6.85429	-137.529	-32.3478	-90.2646		38.8	-1011.64	-2971.77	-1397.76		38.8	-8.74627	-985.861		38.8	-644.26	-1773.67		38.8	-208.017	-4375.55		38.8	-3039.98	-2884.09
38.9	-9.65672	-136.906	-38.264	-96.4922		38.9	-1020.05	-2963.36	-1404.92		38.9	-6.56661	-976.52		38.9	-643.015	-1781.15		38.9	-209.262	-4388.94		38.9	-3026.28	-2896.54
39	-8.4112	-138.151	-37.6412	-93.3784		39	-1024.41	-2956.51	-1399.63		39	-6.56661	-959.705		39	-646.44	-1802.94		39	-209.885	-4383.96		39	-3014.45	-2896.85
39.1	-6.23153	-136.283	-36.0843	-86.528		39.1	-1025.34	-2952.78	-1396.51		39.1	-7.18937	-956.903		39.1	-643.949	-1792.04		39.1	-217.358	-4361.54		39.1	-3009.47	-2880.66
39.2	-5.29739	-129.121	-32.3478	-86.528		39.2	-1017.87	-2963.68	-1385.3		39.2	-10.6146	-941.956		39.2	-641.147	-1786.44		39.2	-219.227	-4352.51		39.2	-3015.7	-2882.22
39.3	-8.09982	-129.121	-39.8209	-84.9711		39.3	-1016.31	-2967.41	-1396.82		39.3	-6.87799	-949.43		39.3	-642.392	-1774.61		39.3	-219.849	-4352.82		39.3	-3016.94	-2880.66
39.4	-6.54291	-129.121	-43.5575	-80.9231		39.4	-1008.84	-2959.63	-1400.25		39.4	-7.18937	-960.328		39.4	-650.799	-1776.47		39.4	-217.981	-4353.75		39.4	-3008.22	-2893.74
39.5	-1.56082	-123.828	-37.6412	-82.1687		39.5	-1000.74	-2968.66	-1391.84		39.5	-10.3032	-958.771		39.5	-652.356	-1780.21		39.5	-212.688	-4369.63		39.5	-3001.68	-2896.23
39.6	-4.36325	-126.942	-38.8868	-78.7435		39.6	-1004.48	-2954.96	-1401.5		39.6	-8.12351	-949.741		39.6	-654.225	-1790.49		39.6	-204.903	-4364.03		39.6	-2993.59	-2886.89
39.7	-4.05187	-135.972	-36.3957	-77.1866		39.7	-1006.66	-2941.88	-1394.33		39.7	-6.25523	-943.202		39.7	-647.997	-1775.85		39.7	-208.951	-4356.87		39.7	-2984.56	-2895.92
39.8	-6.23153	-132.546	-30.4795	-78.1207		39.8	-1003.54	-2942.81	-1383.75		39.8	-5.63246	-945.07		39.8	-643.326	-1785.82		39.8	-210.819	-4353.13		39.8	-2989.54	-2897.79
39.9	-7.47705	-137.217	-37.3299	-74.0728		39.9	-998.562	-2931.29	-1389.66		39.9	-8.12351	-942.268		39.9	-634.608	-1776.16		39.9	-213.31	-4358.74		39.9	-2995.77	-2893.74
40	-7.47705	-137.529	-31.4136	-71.2703		40	-996.382	-2934.72	-1391.84		40	-9.05765	-938.22		40	-643.015	-1786.13		40	-212.376	-4367.77		40	-2985.18	-2892.49
40.1	-9.9681	-130.055	-30.1681	-67.2224		40.1	-1002.92	-2931.29	-1385.3		40.1	-8.74627	-935.106		40.1	-645.817	-1788.93		40.1	-216.113	-4358.74		40.1	-2988.29	-2899.34
40.2	-9.65672	-118.534	-31.725	-66.5996		40.2	-999.185	-2936.59	-1384.99		40.2	-6.25523	-935.106		40.2	-645.194	-1785.82		40.2	-222.652	-4364.34		40.2	-3002.93	-2912.11
40.3	-7.16568	-124.139	-32.3478	-73.1386		40.3	-990.466	-2925.38	-1383.44		40.3	-5.32108	-920.783		40.3	-637.721	-1807.92		40.3	-220.783	-4363.1		40.3	-3001.68	-2910.86
40.4	-9.34534	-122.271	-32.3478	-73.45		40.4	-977.699	-2925.38	-1374.41		40.4	-6.87799	-929.813		40.4	-636.787	-1803.88		40.4	-214.867	-4360.6		40.4	-3006.04	-2907.13
40.5	-9.34534	-126.319	-37.0185	-76.2524		40.5	-972.406	-2935.65	-1366.31		40.5	-3.76418	-946.316		40.5	-643.949	-1785.82		40.5	-211.442	-4361.54		40.5	-2999.81	-2891.56
40.6	-7.78844	-129.121	-34.216	-78.4321		40.6	-975.831	-2937.21	-1364.75		40.6	-2.51866	-947.25		40.6	-642.703	-1789.55		40.6	-210.508	-4355.31		40.6	-2997.95	-2896.54
40.7	-5.92015	-133.169	-34.216	-76.2524		40.7	-985.795	-2926.93	-1354.48		40.7	-1.8959	-954.723		40.7	-640.835	-1786.13		40.7	-203.657	-4340.68		40.7	-2995.14	-2913.67
40.8	-4.36325	-132.546	-34.216	-77.1866		40.8	-977.077	-2921.02	-1351.67		40.8	-0.650374	-955.346		40.8	-644.26	-1772.74		40.8	-197.118	-4337.87		40.8	-2987.05	-2902.77
40.9	-6.85429	-135.972	-32.6591	-74.6955		40.9	-974.897	-2919.77	-1352.3		40.9	-0.338993	-962.819		40.9	-641.147	-1773.05		40.9	-199.921	-4340.36		40.9	-2976.46	-2909
41	-9.34534	-136.906	-37.0185	-77.8093		41	-975.208	-2911.99	-1358.53		41	-2.83004	-949.43		41	-639.901	-1783.95		41	-200.232	-4350.33		41	-2964.94	-2919.58
41.1	-7.78844	-138.151	-34.216	-78.7435		41.1	-963.999	-2905.45	-1338.29		41.1	-3.14142	-950.986		41.1	-643.638	-1786.44		41.1	-200.232	-4340.68		41.1	-2958.09	-2928.3
41.2	-5.29739	-140.331	-33.2819	-75.9411		41.2	-968.047	-2894.86	-1333.3		41.2	-4.07556	-947.25		41.2	-644.883	-1797.34		41.2	-198.987	-4321.06		41.2	-2955.29	-2929.24
41.3	-10.2795	-144.068	-32.0364	-76.5638		41.3	-971.783	-2907	-1331.12		41.3	-1.27314	-949.43		41.3	-640.835	-1782.08		41.3	-205.837	-4326.66		41.3	-2959.34	-2919.27
41.4	-11.2136	-149.672	-31.1022	-79.6776		41.4	-962.13	-2909.81	-1335.79		41.4	-4.38694	-952.855		41.4	-637.721	-1772.74		41.4	-203.035	-4318.26		41.4	-2968.37	-2908.06
41.5	-9.9681	-146.559	-31.725	-73.1386		41.5	-959.639	-2906.38	-1346.07		41.5	-1.27314	-955.969		41.5	-628.691	-1782.08		41.5	-204.903	-4274.97		41.5	-2966.81	-2902.15
41.6	-11.2136	-137.529	-28.2998	-71.8931		41.6	-964.621	-2908.87	-1346.07		41.6	-5.32108	-946.316		41.6	-631.182	-1798.58		41.6	-205.526	-4252.87		41.6	-2959.96	-2894.05
41.7	-8.09982	-143.133	-32.9705	-68.7793		41.7	-956.837	-2903.89	-1324.58		41.7	-8.12351	-964.999		41.7	-626.823	-1802.01		41.7	-216.735	-4267.19		41.7	-2962.45	-2902.77
41.8	-9.34534	-140.642	-31.4136	-67.2224		41.8	-950.921	-2887.08	-1299.67		41.8	-5.0097	-966.244		41.8	-617.17	-1798.58		41.8	-220.472	-4243.53		41.8	-2964.63	-2901.83
41.9	-14.6388	-145.936	-24.8746	-68.1565		41.9	-956.525	-2884.59	-1299.67		41.9	-3.76418	-950.364		41.9	-626.2	-1778.97		41.9	-223.897	-4248.51		41.9	-2951.55	-2903.39
42	-16.1957	-140.02	-31.725	-67.2224		42	-954.034	-2887.7	-1301.54		42	-5.32108	-948.807		42	-629.314	-1776.16		42	-204.28	-4264.08		42	-2939.72	-2893.12
42.1	-13.0819	-135.972	-34.5274	-65.9769		42.1	-948.43	-2877.73	-1322.4		42.1	-5.32108	-951.298		42.1	-624.955	-1783.64		42.1	-198.987	-4261.27		42.1	-2934.74	-2878.79
42.2	-16.5071	-133.792	-26.7429	-66.5996		42.2	-950.298	-2886.76	-1327.39		42.2	-4.07556	-956.591		42.2	-616.547	-1794.22		42.2	-198.053	-4282.14		42.2	-2953.73	-2882.22
42.3	-13.3933	-132.235	-27.9884	-65.0427		42.3	-952.478	-2879.91	-1312.13		42.3	-4.38694	-959.394		42.3	-618.727	-1790.8		42.3	-193.071	-4282.14		42.3	-2954.66	-2883.46
42.4	-9.65672	-132.235	-32.3478	-65.0427		42.4	-947.807	-2867.15	-1297.49		42.4	-6.87799	-952.543		42.4	-618.104	-1789.86		42.4	-197.118	-4253.49		42.4	-2946.26	-2884.71
42.5	-9.65672	-130.055	-35.4616	-69.0907		42.5	-944.07	-2852.82	-1297.18		42.5	-8.43489	-946.004		42.5	-613.122	-1786.75		42.5	-195.562	-4261.59		42.5	-2946.26	-2879.73
42.6	-13.3933	-130.055	-30.4795	-68.1565		42.6	-948.43	-2839.75	-1308.39		42.6	-6.87799	-944.447		42.6	-624.021	-1796.71		42.6	-186.532	-4265.32		42.6	-2938.47	-2879.41
42.7	-13.3933	-131.924	-32.6591	-72.2045		42.7	-944.07	-2845.97	-1304.34		42.7	-7.18937	-939.154		42.7	-624.332	-1804.5		42.7	-190.268	-4255.67		42.7	-2935.67	-2894.36
42.8	-11.8364	-130.055	-26.1202	-76.5638		42.8	-940.334	-2851.27	-1299.67		42.8	-6.87799	-944.136		42.8	-620.907	-1810.41		42.8	-195.25	-4300.51		42.8	-2936.29	-2901.52
42.9	-7.16568	-130.678	-26.1202	-78.1207		42.9	-937.531	-2854.07	-1301.85		42.9	-5.32108	-962.508		42.9	-616.859	-1785.82		42.9	-189.957	-4299.89		42.9	-2934.43	-2895.92
43	-10.5909	-129.433	-26.7429	-83.7256		43	-943.136	-2845.66	-1301.85		43	-3.4528	-967.49		43	-606.272	-1785.82		43	-192.448	-4306.11		43	-2928.51	-2879.1
43.1	-13.7047	-122.271	-35.1502	-84.6597		43.1	-957.771	-2837.26	-1303.72		43.1	-3.14142	-964.376		43.1	-609.074	-1771.8		43.1	-196.496	-4292.41		43.1	-2931.31	-2877.23
43.2	-7.47705	-127.876	-29.234	-87.4621		43.2	-949.052	-2826.05	-1288.46		43.2	-6.56661	-962.819		43.2	-610.943	-1781.15		43.2	-201.166	-4291.79		43.2	-2949.37	-2884.09
43.3	-11.2136	-138.463	-32.0364	-92.1328		43.3	-940.956	-2823.87	-1299.67		43.3	-6.25523	-964.376		43.3	-614.056	-1789.55		43.3	-206.149	-4311.41		43.3	-2951.55	-2883.15
43.4	-14.9502	-128.81	-37.3299	-91.5101		43.4	-926.944	-2823.24	-1319.91		43.4	-8.12351	-965.31		43.4	-607.206	-1779.59		43.4	-201.166	-4321.68		43.4	-2942.83	-2884.71
43.5	-10.2795	-128.499	-34.8388	-89.9532		43.5	-924.765	-2813.9	-1322.09		43.5	-4.07556	-960.328		43.5	-610.32	-1792.67		43.5	-197.118	-4303.31		43.5	-2931	-2882.84
43.6	-7.47705	-136.594	-35.1502	-86.2166		43.6	-925.699	-2813.28	-1311.82		43.6	-6.25523	-967.801		43.6	-605.026	-1793.91		43.6	-196.184	-4294.28		43.6	-2918.23	-2895.92
43.7	-10.2795	-127.564	-38.264	-85.2825		43.7	-926.01	-2809.54	-1284.42		43.7	-6.25523	-958.148		43.7	-611.565	-1789.86		43.7	-194.939	-4309.23		43.7	-2917.92	-2903.08
43.8	-9.34534	-121.96	-37.3299	-84.3483		43.8	-927.878	-2805.18	-1282.24		43.8	-6.56661	-957.837		43.8	-612.811	-1791.42		43.8	-184.663	-4318.57		43.8	-2906.71	-2906.5
43.9	-11.8364	-116.355	-34.5274	-79.989		43.9	-927.878	-2816.7	-1287.53		43.9	-7.50075	-952.855		43.9	-603.781	-1783.32		43.9	-190.891	-4318.88		43.9	-2900.48	-2900.59
44	-9.9681	-117.912	-33.9047	-78.1207		44	-918.226	-2818.88	-1276.32		44	-9.05765	-936.663		44	-601.29	-1780.21		44	-183.106	-4300.82		44	-2912.32	-2890.62
44.1	-9.03396	-119.157	-35.773	-87.1508		44.1	-923.831	-2827.91	-1278.81		44.1	-10.6146	-945.693		44.1	-608.763	-1772.12		44.1	-180.304	-4284		44.1	-2915.43	-2886.26
44.2	-13.0819	-117.289	-35.1502	-88.0849		44.2	-920.094	-2835.39	-1280.68		44.2	-7.81213	-941.645		44.2	-607.206	-1773.36		44.2	-182.795	-4294.28		44.2	-2914.81	-2889.07
44.3	-6.85429	-111.373	-36.3957	-86.528		44.3	-923.208	-2834.45	-1274.14		44.3	-9.36903	-941.956		44.3	-602.847	-1761.84		44.3	-184.04	-4303		44.3	-2903.91	-2891.56
44.4	-6.85429	-111.061	-33.2819	-87.1508		44.4	-918.848	-2833.83	-1261.69		44.4	-7.81213	-938.843		44.4	-590.703	-1773.05		44.4	-187.777	-4314.83		44.4	-2896.44	-2881.59
44.5	-7.16568	-116.666	-33.2819	-90.2646		44.5	-909.196	-2832.9	-1263.24		44.5	-8.12351	-943.825		44.5	-595.062	-1769		44.5	-186.22	-4336.01		44.5	-2895.5	-2874.74
44.6	-8.4112	-123.828	-33.2819	-91.1987		44.6	-903.591	-2832.9	-1259.51		44.6	-3.4528	-955.346		44.6	-591.326	-1759.66		44.6	-181.861	-4338.81		44.6	-2902.66	-2884.71
44.7	-7.47705	-121.648	-31.1022	-88.7077		44.7	-901.1	-2829.78	-1252.03		44.7	-3.76418	-935.106		44.7	-592.883	-1769.94		44.7	-175.322	-4339.43		44.7	-2907.33	-2890.31
44.8	-6.54291	-126.942	-36.3957	-86.528		44.8	-905.148	-2823.55	-1255.77		44.8	-9.05765	-941.334		44.8	-600.978	-1765.26		44.8	-185.286	-4328.53		44.8	-2896.75	-2894.05
44.9	-10.2795	-129.433	-33.9047	-88.7077		44.9	-912.932	-2813.9	-1261.37		44.9	-6.87799	-939.465		44.9	-596.93	-1787.06		44.9	-194.005	-4313.9		44.9	-2888.65	-2881.91
45	-5.29739	-123.516	-32.6591	-83.7256		45	-909.196	-2807.05	-1252.97		45	-4.69832	-935.729		45	-592.883	-1776.79		45	-196.184	-4323.86		45	-2878.06	-2856.37
45.1	-7.47705	-117.912	-33.5933	-80.3004		45.1	-910.13	-2810.48	-1252.34		45.1	-7.18937	-921.405		45.1	-591.637	-1769.94		45.1	-195.25	-4340.36		45.1	-2875.26	-2870.7
45.2	-7.47705	-115.109	-35.1502	-84.3483		45.2	-908.261	-2811.41	-1260.75		45.2	-2.20728	-905.214		45.2	-598.799	-1770.56		45.2	-202.723	-4338.81		45.2	-2881.8	-2880.66
45.3	-9.65672	-110.127	-33.9047	-80.6118		45.3	-911.998	-2816.7	-1250.48		45.3	-3.14142	-911.753		45.3	-601.601	-1771.18		45.3	-206.46	-4332.89		45.3	-2882.11	-2884.09
45.4	-8.09982	-107.947	-32.3478	-77.1866		45.4	-921.028	-2818.88	-1239.58		45.4	-8.43489	-917.98		45.4	-597.865	-1779.28		45.4	-207.705	-4332.89		45.4	-2886.16	-2882.22
45.5	-7.47705	-120.091	-33.9047	-76.2524		45.5	-906.082	-2820.75	-1239.27		45.5	-6.87799	-913.309		45.5	-590.08	-1786.13		45.5	-206.149	-4340.99		45.5	-2882.11	-2867.27
45.6	-9.65672	-126.942	-36.3957	-76.5638		45.6	-892.381	-2812.66	-1249.85		45.6	-9.99179	-889.956		45.6	-595.996	-1780.52		45.6	-198.053	-4339.43		45.6	-2868.72	-2859.8
45.7	-4.67463	-126.942	-32.0364	-74.6955		45.7	-884.908	-2810.79	-1249.23		45.7	-6.87799	-880.303		45.7	-595.062	-1778.03		45.7	-194.316	-4341.92		45.7	-2862.18	-2870.7
45.8	-6.23153	-130.99	-30.7909	-75.9411		45.8	-891.447	-2811.72	-1241.45		45.8	-7.50075	-890.89		45.8	-588.835	-1797.03		45.8	-187.777	-4356.56		45.8	-2862.5	-2876.3
45.9	-8.4112	-129.121	-29.5453	-75.3183		45.9	-893.004	-2802.07	-1245.49		45.9	-8.43489	-901.788		45.9	-590.08	-1811.97		45.9	-185.909	-4362.16		45.9	-2861.56	-2878.79
46	-8.09982	-129.121	-31.1022	-71.2703		46	-889.89	-2798.96	-1246.12		46	-10.3032	-895.872		46	-586.966	-1797.96		46	-184.663	-4351.89		46	-2855.65	-2886.89
46.1	-5.29739	-122.894	-32.0364	-72.5159		46.1	-889.89	-2792.11	-1231.48		46.1	-10.3032	-909.573		46.1	-580.116	-1795.78		46.1	-175.945	-4334.14		46.1	-2849.73	-2869.76
46.2	-7.78844	-116.666	-29.8567	-72.2045		46.2	-900.477	-2781.52	-1243.31		46.2	-9.36903	-896.495		46.2	-581.984	-1800.14		46.2	-175.322	-4335.69		46.2	-2828.87	-2871.63
46.3	-9.34534	-120.403	-30.1681	-70.959		46.3	-903.279	-2776.22	-1240.2		46.3	-8.12351	-877.189		46.3	-579.182	-1793.6		46.3	-179.37	-4342.23		46.3	-2831.67	-2883.77
46.4	-5.92015	-115.732	-32.6591	-67.5338		46.4	-891.135	-2776.85	-1238.95		46.4	-8.74627	-867.536		46.4	-574.511	-1804.19		46.4	-181.549	-4343.79		46.4	-2836.96	-2868.52
46.5	-7.16568	-111.995	-34.5274	-63.1744		46.5	-894.872	-2777.16	-1252.03		46.5	-7.18937	-872.207		46.5	-573.888	-1788.31		46.5	-181.861	-4335.69		46.5	-2824.2	-2859.8
46.6	-6.54291	-111.684	-33.5933	-61.3062		46.6	-897.363	-2779.34	-1252.97		46.6	-6.87799	-886.842		46.6	-570.152	-1794.85		46.6	-175.01	-4343.79		46.6	-2828.87	-2854.19
46.7	-4.36325	-109.816	-37.6412	-63.7972		46.7	-890.824	-2773.73	-1257.02		46.7	-9.05765	-879.68		46.7	-577.314	-1803.25		46.7	-173.142	-4310.16		46.7	-2833.54	-2842.05
46.8	-3.11773	-106.702	-29.8567	-69.4021		46.8	-885.219	-2771.87	-1259.19		46.8	-5.0097	-884.662		46.8	-578.87	-1810.73		46.8	-175.322	-4296.77		46.8	-2825.75	-2861.04
46.9	-4.98601	-104.211	-32.6591	-67.8452		46.9	-886.153	-2760.34	-1248.61		46.9	-3.4528	-895.561		46.9	-574.822	-1815.71		46.9	-176.567	-4301.75		46.9	-2824.82	-2876.3
47	-3.11773	-105.456	-33.2819	-68.1565		47	-891.758	-2755.36	-1238.33		47	-6.25523	-898.363		47	-575.757	-1800.76		47	-181.861	-4311.72		47	-2824.2	-2875.99
47.1	-3.11773	-106.39	-36.7071	-63.7972		47.1	-893.004	-2763.77	-1254.21		47.1	-6.87799	-896.806		47.1	-582.918	-1801.7		47.1	-177.813	-4324.48		47.1	-2831.05	-2877.55
47.2	-4.67463	-107.013	-36.0843	-59.1265		47.2	-904.214	-2752.56	-1241.45		47.2	-7.81213	-900.543		47.2	-582.296	-1817.89		47.2	-178.747	-4317.63		47.2	-2828.56	-2877.55
47.3	-7.78844	-103.899	-35.1502	-60.0606		47.3	-904.836	-2751	-1239.27		47.3	-9.05765	-898.363		47.3	-580.739	-1821		47.3	-178.124	-4299.57		47.3	-2813.61	-2885.02
47.4	-4.05187	-111.684	-33.5933	-63.1744		47.4	-893.004	-2757.85	-1242.07		47.4	-6.87799	-900.231		47.4	-578.87	-1819.44		47.4	-176.256	-4267.81		47.4	-2803.02	-2877.86
47.5	-4.67463	-116.977	-31.725	-66.911		47.5	-889.579	-2762.84	-1228.68		47.5	-7.18937	-904.902		47.5	-587.9	-1807.92		47.5	-175.322	-4264.39		47.5	-2800.22	-2895.61
47.6	-5.92015	-113.864	-32.3478	-65.0427		47.6	-891.135	-2760.97	-1223.7		47.6	-7.50075	-905.836		47.6	-586.966	-1808.55		47.6	-183.729	-4278.4		47.6	-2805.51	-2900.59
47.7	-3.11773	-117.6	-34.8388	-67.2224		47.7	-888.956	-2766.88	-1227.12		47.7	-10.9259	-901.788		47.7	-578.87	-1815.09		47.7	-181.549	-4268.75		47.7	-2805.82	-2887.82
47.8	-1.24944	-114.175	-32.3478	-65.3541		47.8	-878.68	-2757.85	-1237.09		47.8	-10.6146	-894.938		47.8	-573.888	-1814.77		47.8	-177.813	-4265.63		47.8	-2803.02	-2897.79
47.9	-8.09982	-105.768	-29.234	-61.9289		47.9	-884.597	-2747.27	-1248.3		47.9	-7.81213	-895.872		47.9	-577.002	-1809.48		47.9	-180.615	-4251.93		47.9	-2801.47	-2894.98
48	-4.98601	-110.127	-30.4795	-60.9948		48	-887.088	-2734.81	-1229.61		48	-7.81213	-896.183		48	-579.805	-1814.77		48	-181.238	-4255.98		48	-2800.53	-2878.17
48.1	-6.23153	-114.798	-31.1022	-62.8631		48.1	-892.07	-2729.83	-1212.49		48.1	-11.2373	-898.674		48.1	-574.511	-1814.46		48.1	-180.304	-4287.74		48.1	-2796.17	-2879.73
48.2	-6.85429	-108.259	-35.4616	-64.42		48.2	-890.513	-2736.06	-1211.86		48.2	-9.36903	-916.735		48.2	-570.775	-1804.81		48.2	-175.01	-4304.87		48.2	-2797.11	-2887.82
48.3	-1.24944	-99.8515	-31.1022	-63.4858		48.3	-891.447	-2737.93	-1220.89		48.3	-10.3032	-915.8		48.3	-563.924	-1797.34		48.3	-172.208	-4296.77		48.3	-2794.3	-2884.4
48.4	-0.0039196	-98.606	-37.6412	-66.5996		48.4	-878.369	-2728.9	-1213.73		48.4	-11.5487	-903.968		48.4	-555.206	-1798.58		48.4	-170.651	-4291.48		48.4	-2790.57	-2890.31
48.5	-3.74049	-100.163	-32.3478	-70.0248		48.5	-883.351	-2727.03	-1210.93		48.5	-5.94384	-892.758		48.5	-566.104	-1807.61		48.5	-167.537	-4270.3		48.5	-2790.88	-2880.97
48.6	0.930222	-103.899	-32.3478	-72.5159		48.6	-871.519	-2719.24	-1219.34		48.6	-6.56661	-885.908		48.6	-569.84	-1799.21		48.6	-170.028	-4287.43		48.6	-2798.35	-2873.81
48.7	-3.42911	-110.75	-37.6412	-70.6476		48.7	-865.602	-2716.44	-1219.96		48.7	-7.81213	-897.74		48.7	-562.056	-1794.85		48.7	-170.34	-4296.77		48.7	-2795.55	-2867.89
48.8	-1.56082	-109.504	-34.8388	-72.8272		48.8	-862.8	-2710.83	-1242.07		48.8	-8.12351	-903.345		48.8	-563.301	-1797.03		48.8	-164.424	-4321.68		48.8	-2791.81	-2873.81
48.9	-3.11773	-110.127	-32.3478	-74.0728		48.9	-863.111	-2720.8	-1249.85		48.9	-7.18937	-900.543		48.9	-563.301	-1801.07		48.9	-155.082	-4331.65		48.9	-2791.19	-2874.74
49	-2.80635	-116.977	-36.7071	-75.9411		49	-875.255	-2715.51	-1230.86		49	-8.74627	-902.722		49	-554.894	-1788.93		49	-156.016	-4340.99		49	-2785.27	-2874.12
49.1	-2.80635	-119.468	-35.4616	-74.0728		49.1	-870.896	-2717.37	-1231.48		49.1	-7.50075	-908.95		49.1	-556.14	-1783.64		49.1	-158.819	-4313.27		49.1	-2784.34	-2868.2
49.2	-2.18358	-118.846	-40.755	-77.8093		49.2	-864.668	-2718.31	-1228.37		49.2	-8.12351	-901.477		49.2	-559.253	-1783.64		49.2	-156.328	-4314.52		49.2	-2778.11	-2865.71
49.3	-3.42911	-126.007	-41.3778	-75.9411		49.3	-868.405	-2715.19	-1211.24		49.3	-8.43489	-881.237		49.3	-562.056	-1811.35		49.3	-156.328	-4325.11		49.3	-2771.57	-2860.11
49.4	1.86436	-129.433	-42.0006	-75.0069		49.4	-871.207	-2712.7	-1211.55		49.4	-6.87799	-886.842		49.4	-559.253	-1811.04		49.4	-161.621	-4308.29		49.4	-2781.54	-2879.41
49.5	-4.05187	-130.678	-45.4258	-76.8752		49.5	-863.734	-2708.34	-1209.37		49.5	-8.12351	-891.201		49.5	-559.876	-1814.15		49.5	-167.226	-4325.73		49.5	-2777.8	-2884.09
49.6	-2.18358	-122.271	-44.4916	-71.8931		49.6	-862.489	-2703.36	-1201.9		49.6	-3.4528	-884.662		49.6	-557.074	-1818.2		49.6	-167.849	-4320.44		49.6	-2773.75	-2884.71
49.7	-4.98601	-123.516	-44.803	-72.8272		49.7	-874.01	-2705.54	-1214.67		49.7	-4.07556	-890.579		49.7	-554.583	-1819.76		49.7	-170.963	-4301.44		49.7	-2773.13	-2898.72
49.8	-0.62668	-130.367	-45.4258	-70.3362		49.8	-881.794	-2701.49	-1203.15		49.8	-5.63246	-902.411		49.8	-558.319	-1822.25		49.8	-168.471	-4322.93		49.8	-2769.08	-2917.4
49.9	-4.98601	-130.055	-50.0965	-69.4021		49.9	-870.584	-2701.18	-1195.05		49.9	-5.32108	-902.1		49.9	-553.649	-1812.91		49.9	-165.98	-4319.5		49.9	-2769.08	-2910.55
50	0.307461	-127.253	-44.803	-73.1386		50	-867.782	-2710.21	-1192.25		50	-7.18937	-917.669		50	-546.487	-1818.51		50	-166.603	-4309.23		50	-2762.23	-2902.15
50.1	-1.24944	-126.63	-50.4078	-74.0728		50.1	-860.932	-2703.98	-1183.22		50.1	-9.05765	-933.861		50.1	-552.714	-1814.77		50.1	-170.028	-4304.87		50.1	-2769.7	-2891.25
50.2	0.618841	-130.678	-48.2282	-72.5159		50.2	-851.279	-2699.31	-1188.82		50.2	-8.74627	-922.339		50.2	-558.008	-1826.3		50.2	-161.621	-4309.85		50.2	-2778.42	-2890
50.3	1.55298	-125.385	-45.4258	-72.5159		50.3	-847.854	-2706.16	-1179.48		50.3	-10.6146	-929.19		50.3	-556.14	-1845.6		50.3	-164.735	-4290.23		50.3	-2774.38	-2880.04
50.4	3.42127	-120.403	-43.8688	-71.8931		50.4	-854.393	-2722.98	-1186.64		50.4	-9.68041	-920.471		50.4	-562.367	-1826.3		50.4	-172.519	-4273.11		50.4	-2756.94	-2890.62
50.5	2.48713	-120.403	-42.0006	-72.5159		50.5	-853.458	-2722.04	-1191		50.5	-8.12351	-910.196		50.5	-558.008	-1826.3		50.5	-171.585	-4267.81		50.5	-2740.75	-2902.77
50.6	1.86436	-115.421	-39.8209	-69.7134		50.6	-843.806	-2721.11	-1177.92		50.6	-9.05765	-900.231		50.6	-550.535	-1818.82		50.6	-171.274	-4267.19		50.6	-2741.68	-2905.88
50.7	1.55298	-110.127	-42.3119	-65.3541		50.7	-849.099	-2710.21	-1169.21		50.7	-9.68041	-908.95		50.7	-548.667	-1816.33		50.7	-171.274	-4260.65		50.7	-2737.01	-2898.41
50.8	-0.0039196	-111.373	-44.4916	-71.8931		50.8	-846.297	-2709.28	-1184.15		50.8	-5.32108	-922.962		50.8	-548.978	-1813.84		50.8	-170.963	-4282.14		50.8	-2736.08	-2888.76
50.9	0.307461	-117.6	-42.3119	-71.5817		50.9	-844.74	-2699.94	-1182.91		50.9	-8.12351	-920.783		50.9	-552.092	-1807.61		50.9	-175.945	-4279.96		50.9	-2736.39	-2870.07
51	1.2416	-118.534	-42.3119	-66.5996		51	-849.722	-2697.45	-1179.17		51	-6.87799	-910.818		51	-549.912	-1816.64		51	-184.975	-4268.44		51	-2731.4	-2870.07
51.1	-0.62668	-115.421	-44.803	-66.2883		51.1	-848.476	-2702.12	-1192.56		51.1	-5.94384	-903.968		51.1	-547.732	-1807.92		51.1	-182.795	-4268.44		51.1	-2727.67	-2875.37
51.2	-0.3153	-117.6	-41.3778	-63.1744		51.2	-839.446	-2709.9	-1171.7		51.2	-5.63246	-904.591		51.2	-542.128	-1811.35		51.2	-177.502	-4261.27		51.2	-2734.21	-2876.3
51.3	0.618841	-121.96	-40.4437	-61.9289		51.3	-834.776	-2701.49	-1167.03		51.3	-4.69832	-907.393		51.3	-545.864	-1826.61		51.3	-169.094	-4264.7		51.3	-2738.57	-2873.5
51.4	-1.8722	-122.271	-47.294	-62.2403		51.4	-834.464	-2690.28	-1173.88		51.4	-8.12351	-892.135		51.4	-543.996	-1821.31		51.4	-176.879	-4267.81		51.4	-2725.49	-2875.99
51.5	-3.11773	-114.798	-41.3778	-65.9769		51.5	-841.315	-2693.4	-1163.6		51.5	-7.18937	-882.794		51.5	-543.996	-1809.79		51.5	-180.304	-4263.77		51.5	-2726.11	-2876.92
51.6	1.55298	-112.929	-44.803	-59.7493		51.6	-851.902	-2693.4	-1156.75		51.6	-5.94384	-881.549		51.6	-542.75	-1814.15		51.6	-180.615	-4243.84		51.6	-2723.62	-2893.12
51.7	2.17575	-109.193	-40.1323	-65.9769		51.7	-851.279	-2693.09	-1158.93		51.7	-6.87799	-890.579		51.7	-545.241	-1815.71		51.7	-179.681	-4219.86		51.7	-2711.17	-2912.42
51.8	0.618841	-110.438	-33.9047	-61.6175		51.8	-851.279	-2686.24	-1160.18		51.8	-7.81213	-888.399		51.8	-541.505	-1829.41		51.8	-177.19	-4233.25		51.8	-2711.79	-2892.49
51.9	2.17575	-118.223	-35.4616	-64.1086		51.9	-849.722	-2688.42	-1152.7		51.9	-9.36903	-889.644		51.9	-546.487	-1824.12		51.9	-178.747	-4259.41		51.9	-2715.52	-2882.22
52	0.307461	-111.995	-39.1981	-62.2403		52	-850.345	-2690.28	-1159.86		52	-7.18937	-896.183		52	-540.882	-1827.23		52	-185.909	-4249.44		52	-2711.17	-2892.8
52.1	-0.0039196	-116.043	-32.3478	-61.6175		52.1	-847.231	-2680.01	-1166.4		52.1	-8.74627	-911.441		52.1	-535.9	-1819.76		52.1	-187.777	-4239.17		52.1	-2703.69	-2894.98
52.2	0.618841	-119.157	-32.6591	-56.9468		52.2	-856.261	-2676.27	-1162.67		52.2	-9.99179	-898.986		52.2	-532.475	-1814.77		52.2	-186.532	-4254.11		52.2	-2703.07	-2894.67
52.3	0.618841	-125.696	-33.5933	-56.9468		52.3	-855.95	-2667.86	-1160.49		52.3	-7.81213	-871.584		52.3	-536.523	-1812.59		52.3	-196.496	-4265.32		52.3	-2698.4	-2887.2
52.4	0.307461	-123.828	-35.1502	-57.5696		52.4	-849.411	-2674.4	-1173.57		52.4	-7.81213	-862.243		52.4	-533.409	-1805.12		52.4	-200.855	-4276.53		52.4	-2691.55	-2890
52.5	-4.05187	-123.205	-31.1022	-60.372		52.5	-847.231	-2682.81	-1173.88		52.5	-10.3032	-866.914		52.5	-536.834	-1797.03		52.5	-205.214	-4278.09		52.5	-2698.4	-2892.18
52.6	0.930222	-117.6	-32.6591	-62.5517		52.6	-839.446	-2673.16	-1160.8		52.6	-5.94384	-860.997		52.6	-533.72	-1794.53		52.6	-203.035	-4281.51		52.6	-2703.38	-2898.41
52.7	-3.42911	-121.025	-33.9047	-63.7972		52.7	-837.578	-2674.09	-1151.15		52.7	-10.6146	-854.77		52.7	-530.606	-1805.12		52.7	-201.166	-4290.23		52.7	-2697.46	-2881.59
52.8	-0.62668	-116.355	-32.9705	-64.1086		52.8	-836.333	-2670.67	-1162.98		52.8	-13.7284	-854.458		52.8	-533.409	-1807.3		52.8	-199.61	-4284.32		52.8	-2694.04	-2875.37
52.9	1.55298	-119.78	-33.5933	-63.4858		52.9	-834.464	-2664.13	-1166.71		52.9	-13.417	-845.74		52.9	-529.984	-1816.33		52.9	-203.969	-4308.29		52.9	-2687.81	-2881.28
53	-1.24944	-117.912	-33.9047	-64.42		53	-837.889	-2651.05	-1157.37		53	-12.7942	-857.261		53	-528.427	-1807.92		53	-203.969	-4326.66		53	-2693.42	-2884.71
53.1	-0.3153	-125.385	-29.8567	-72.2045		53.1	-839.446	-2658.83	-1137.13		53.1	-12.4828	-865.357		53.1	-526.247	-1811.35		53.1	-200.544	-4322.93		53.1	-2691.55	-2886.58
53.2	-1.24944	-123.205	-37.9526	-66.5996		53.2	-837.267	-2668.8	-1135.89		53.2	-9.99179	-867.225		53.2	-526.247	-1799.52		53.2	-201.478	-4309.23		53.2	-2687.19	-2887.2
53.3	-1.24944	-123.828	-36.7071	-68.1565		53.3	-831.973	-2666.62	-1140.87		53.3	-12.7942	-861.932		53.3	-528.427	-1785.5		53.3	-196.807	-4297.71		53.3	-2689.37	-2891.56
53.4	-0.3153	-120.403	-37.0185	-67.8452		53.4	-829.171	-2667.55	-1138.07		53.4	-12.7942	-858.506		53.4	-532.475	-1795.16		53.4	-200.544	-4289.3		53.4	-2692.79	-2903.08
53.5	0.930222	-114.798	-33.9047	-70.0248		53.5	-834.776	-2661.01	-1147.41		53.5	-8.43489	-840.135		53.5	-533.409	-1788.93		53.5	-208.017	-4293.66		53.5	-2685.63	-2886.58
53.6	-2.80635	-114.798	-31.1022	-73.7614		53.6	-838.824	-2668.18	-1152.08		53.6	-13.7284	-829.859		53.6	-530.295	-1779.9		53.6	-213.933	-4285.25		53.6	-2689.06	-2886.89
53.7	-2.49496	-107.325	-29.8567	-74.0728		53.7	-835.398	-2671.29	-1149.9		53.7	-12.7942	-831.105		53.7	-533.72	-1787.68		53.7	-212.688	-4272.48		53.7	-2692.48	-2886.26
53.8	-2.49496	-107.013	-32.3478	-75.3183		53.8	-834.153	-2652.3	-1148.34		53.8	-11.5487	-829.859		53.8	-532.475	-1794.22		53.8	-206.46	-4266.26		53.8	-2702.76	-2889.07
53.9	-0.938061	-106.702	-32.0364	-76.2524		53.9	-835.087	-2641.4	-1143.36		53.9	-11.2373	-833.285		53.9	-533.409	-1806.37		53.9	-210.819	-4265.32		53.9	-2714.28	-2879.73
54	2.79851	-106.702	-34.8388	-83.4142		54	-830.105	-2645.76	-1143.98		54	-11.5487	-845.74		54	-533.72	-1800.14		54	-209.574	-4259.72		54	-2712.1	-2875.06
54.1	0.930222	-106.39	-41.0664	-83.7256		54.1	-834.153	-2646.69	-1158.62		54.1	-6.87799	-851.033		54.1	-528.115	-1798.27		54.1	-191.514	-4270.62		54.1	-2702.14	-2879.41
54.2	1.2416	-106.079	-48.2282	-85.5938		54.2	-826.057	-2644.51	-1155.19		54.2	-8.74627	-860.063		54.2	-527.493	-1801.7		54.2	-188.711	-4286.5		54.2	-2699.02	-2869.14
54.3	-0.3153	-108.882	-43.5575	-81.8573		54.3	-825.746	-2643.27	-1159.55		54.3	-11.5487	-862.866		54.3	-531.852	-1803.56		54.3	-196.496	-4272.48		54.3	-2675.67	-2854.5
54.4	-1.24944	-102.031	-41.6892	-82.48		54.4	-829.794	-2645.13	-1168.58		54.4	-7.18937	-852.59		54.4	-531.541	-1809.17		54.4	-197.118	-4253.8		54.4	-2683.14	-2869.14
54.5	1.55298	-103.588	-42.3119	-82.7914		54.5	-829.794	-2649.18	-1162.67		54.5	-8.74627	-840.135		54.5	-532.786	-1807.92		54.5	-199.921	-4265.01		54.5	-2690.3	-2864.47
54.6	1.2416	-105.768	-37.9526	-78.1207		54.6	-826.368	-2634.86	-1167.65		54.6	-8.12351	-853.213		54.6	-536.523	-1803.88		54.6	-194.939	-4267.19		54.6	-2683.45	-2867.89
54.7	-2.80635	-107.636	-33.9047	-75.0069		54.7	-833.219	-2630.5	-1154.57		54.7	-12.1715	-857.884		54.7	-537.768	-1827.85		54.7	-193.071	-4279.96		54.7	-2679.09	-2866.34
54.8	-1.24944	-108.882	-34.5274	-71.5817		54.8	-835.71	-2630.81	-1153.64		54.8	-10.6146	-860.997		54.8	-534.343	-1821.31		54.8	-196.184	-4283.07		54.8	-2676.6	-2859.49
54.9	-3.11773	-106.39	-33.5933	-75.0069		54.9	-824.811	-2626.76	-1166.71		54.9	-10.6146	-868.159		54.9	-528.427	-1813.53		54.9	-191.514	-4259.41		54.9	-2678.16	-2874.74
55	3.42127	-103.899	-33.2819	-72.8272		55	-826.057	-2629.56	-1170.14		55	-7.50075	-848.542		55	-532.475	-1826.92		55	-184.04	-4240.72		55	-2677.54	-2861.98
55.1	2.17575	-99.5401	-36.3957	-73.45		55.1	-821.698	-2633.3	-1176.37		55.1	-7.18937	-819.895		55.1	-535.277	-1819.76		55.1	-182.795	-4240.1		55.1	-2676.6	-2845.47
55.2	0.618841	-98.606	-37.0185	-74.0728		55.2	-818.272	-2632.37	-1176.99		55.2	-6.25523	-831.105		55.2	-538.08	-1800.14		55.2	-184.352	-4232.63		55.2	-2679.09	-2846.1
55.3	-8.09982	-98.2946	-38.5754	-73.7614		55.3	-821.386	-2631.74	-1187.58		55.3	-8.12351	-827.991		55.3	-532.163	-1802.32		55.3	-185.909	-4247.88		55.3	-2684.39	-2853.88
55.4	-1.56082	-97.6718	-36.3957	-69.4021		55.4	-818.895	-2631.74	-1181.35		55.4	-6.87799	-823.009		55.4	-530.606	-1809.17		55.4	-189.023	-4233.56		55.4	-2676.6	-2873.19
55.5	-1.24944	-102.343	-35.1502	-67.8452		55.5	-827.302	-2626.14	-1183.84		55.5	-9.05765	-825.811		55.5	-529.361	-1789.86		55.5	-199.921	-4255.98		55.5	-2666.01	-2884.4
55.6	1.2416	-99.2287	-41.3778	-69.4021		55.6	-820.141	-2621.16	-1192.25		55.6	-6.87799	-824.877		55.6	-527.804	-1792.67		55.6	-205.526	-4264.08		55.6	-2665.7	-2871.32
55.7	3.10989	-94.8694	-37.6412	-68.4679		55.7	-817.961	-2636.73	-1195.05		55.7	-7.18937	-823.32		55.7	-525.313	-1806.99		55.7	-202.101	-4255.36		55.7	-2665.08	-2855.44
55.8	1.86436	-97.6718	-36.0843	-66.911		55.8	-810.177	-2642.02	-1180.1		55.8	-7.81213	-838.889		55.8	-525.313	-1804.5		55.8	-200.232	-4269.06		55.8	-2662.9	-2855.13
55.9	-1.8722	-102.654	-33.5933	-66.5996		55.9	-820.763	-2631.74	-1172.01		55.9	-7.81213	-836.398		55.9	-513.48	-1802.01		55.9	-190.579	-4260.96		55.9	-2656.67	-2841.43
56	3.10989	-106.39	-39.5095	-67.5338		56	-818.584	-2619.6	-1161.73		56	-7.18937	-825.811		56	-516.906	-1794.85		56	-180.615	-4268.44		56	-2642.66	-2846.72
56.1	1.55298	-120.714	-33.9047	-67.8452		56.1	-823.877	-2599.36	-1165.78		56.1	-5.0097	-829.859		56.1	-516.594	-1797.34		56.1	-176.879	-4284.63		56.1	-2641.73	-2847.34
56.2	-1.56082	-124.139	-36.7071	-66.5996		56.2	-824.189	-2605.59	-1168.58		56.2	-4.07556	-824.877		56.2	-514.726	-1802.94		56.2	-178.124	-4277.47		56.2	-2657.3	-2854.5
56.3	-0.0039196	-125.696	-34.5274	-68.4679		56.3	-825.123	-2611.82	-1180.42		56.3	-1.58452	-830.794		56.3	-512.235	-1804.5		56.3	-181.238	-4255.98		56.3	-2653.56	-2854.5
56.4	-2.18358	-131.301	-38.264	-65.3541		56.4	-818.272	-2617.11	-1182.28		56.4	-1.8959	-833.285		56.4	-507.876	-1811.04		56.4	-175.322	-4250.38		56.4	-2645.78	-2850.46
56.5	-1.56082	-128.187	-39.5095	-64.1086		56.5	-810.488	-2626.45	-1177.3		56.5	-6.25523	-837.021		56.5	-510.678	-1804.81		56.5	-172.831	-4246.64		56.5	-2644.84	-2853.88
56.6	-4.36325	-128.187	-38.264	-65.9769		56.6	-806.751	-2632.99	-1149.59		56.6	-2.20728	-844.494		56.6	-510.367	-1807.92		56.6	-172.831	-4236.99		56.6	-2638.61	-2851.08
56.7	-0.938061	-129.433	-37.3299	-62.2403		56.7	-803.638	-2623.34	-1150.21		56.7	-0.338993	-838.889		56.7	-512.235	-1811.35		56.7	-172.208	-4222.97		56.7	-2629.27	-2862.29
56.8	-1.56082	-131.301	-33.9047	-65.0427		56.8	-809.554	-2622.09	-1142.43		56.8	-3.76418	-835.776		56.8	-520.954	-1811.97		56.8	-165.669	-4234.18		56.8	-2631.14	-2871.63
56.9	0.930222	-129.744	-36.0843	-65.6655		56.9	-806.44	-2618.67	-1143.98		56.9	-4.38694	-827.057		56.9	-512.858	-1803.56		56.9	-164.424	-4229.2		56.9	-2638.61	-2849.21
57	1.2416	-128.499	-33.2819	-61.9289		57	-807.063	-2609.95	-1145.23		57	-0.338993	-822.386		57	-515.971	-1787.68		57	-177.502	-4232.63		57	-2629.27	-2855.13
57.1	3.73265	-123.828	-32.9705	-56.3241		57.1	-809.554	-2615.55	-1138.69		57.1	-3.4528	-828.614		57.1	-516.906	-1795.78		57.1	-177.19	-4221.42		57.1	-2634.57	-2866.03
57.2	-0.938061	-124.139	-31.725	-55.0786		57.2	-809.554	-2615.86	-1151.77		57.2	-1.8959	-839.512		57.2	-511.924	-1809.17		57.2	-175.945	-4215.5		57.2	-2637.68	-2868.2
57.3	-2.18358	-117.289	-37.0185	-54.1444		57.3	-802.392	-2605.9	-1139		57.3	-5.0097	-836.087		57.3	-507.564	-1818.82		57.3	-173.142	-4202.73		57.3	-2642.04	-2860.42
57.4	0.618841	-112.618	-33.2819	-54.1444		57.4	-801.147	-2600.29	-1144.92		57.4	-5.63246	-848.542		57.4	-506.63	-1820.07		57.4	-169.717	-4207.72		57.4	-2638.3	-2855.44
57.5	-3.42911	-116.043	-32.9705	-54.4558		57.5	-809.242	-2601.85	-1141.8		57.5	-7.18937	-853.213		57.5	-503.205	-1840		57.5	-176.256	-4217.68		57.5	-2636.43	-2872.88
57.6	3.42127	-113.241	-36.0843	-57.5696		57.6	-815.159	-2624.58	-1129.04		57.6	-5.94384	-836.087		57.6	-501.337	-1824.74		57.6	-173.142	-4215.81		57.6	-2629.27	-2870.07
57.7	-2.80635	-119.157	-34.216	-59.1265		57.7	-810.177	-2628.01	-1113.78		57.7	-4.38694	-847.919		57.7	-501.959	-1823.49		57.7	-167.849	-4230.14		57.7	-2632.39	-2854.19
57.8	-4.05187	-124.139	-32.0364	-59.4379		57.8	-805.194	-2617.11	-1119.07		57.8	-4.38694	-855.704		57.8	-497.289	-1819.13		57.8	-163.489	-4219.55		57.8	-2626.16	-2857.93
57.9	-1.8722	-120.091	-30.7909	-63.4858		57.9	-807.374	-2604.65	-1124.68		57.9	-4.38694	-862.554		57.9	-495.732	-1802.63		57.9	-159.13	-4208.65		57.9	-2624.29	-2855.75
58	-1.56082	-112.618	-32.9705	-62.2403		58	-799.59	-2609.95	-1119.07		58	-5.63246	-862.866		58	-496.977	-1796.71		58	-160.998	-4218.3		58	-2630.83	-2852.01
58.1	-4.36325	-113.241	-36.0843	-66.5996		58.1	-804.883	-2607.15	-1116.58		58.1	-4.07556	-851.967		58.1	-493.863	-1788		58.1	-157.262	-4197.44		58.1	-2628.34	-2855.13
58.2	-1.24944	-111.373	-35.1502	-65.3541		58.2	-807.686	-2598.74	-1112.85		58.2	-3.14142	-843.56		58.2	-486.702	-1801.38		58.2	-160.376	-4218.61		58.2	-2636.43	-2871.94
58.3	-2.80635	-110.127	-32.3478	-60.372		58.3	-806.44	-2595	-1120.01		58.3	-5.0097	-835.776		58.3	-491.372	-1802.94		58.3	-159.441	-4233.25		58.3	-2628.96	-2866.96
58.4	-3.11773	-110.75	-32.0364	-53.2103		58.4	-809.242	-2599.67	-1137.13		58.4	-2.83004	-829.859		58.4	-492.307	-1802.63		58.4	-164.112	-4246.95		58.4	-2616.82	-2875.68
58.5	-4.67463	-108.57	-30.4795	-56.0127		58.5	-807.374	-2587.53	-1124.68		58.5	-2.83004	-834.53		58.5	-497.6	-1812.59		58.5	-167.537	-4231.38		58.5	-2604.67	-2868.83
58.6	-1.56082	-112.929	-28.9226	-62.5517		58.6	-802.081	-2576.63	-1113.16		58.6	-7.18937	-841.38		58.6	-496.977	-1829.72		58.6	-166.292	-4222.97		58.6	-2595.02	-2867.27
58.7	-3.42911	-118.223	-31.1022	-60.0606		58.7	-793.673	-2570.09	-1102.26		58.7	-2.83004	-854.458		58.7	-498.846	-1828.47		58.7	-166.603	-4223.6		58.7	-2594.09	-2850.14
58.8	-2.49496	-120.714	-31.725	-60.0606		58.8	-781.218	-2576.01	-1108.8		58.8	-2.83004	-863.489		58.8	-501.959	-1818.82		58.8	-167.849	-4200.24		58.8	-2598.13	-2854.82
58.9	-3.74049	-118.223	-34.8388	-59.4379		58.9	-780.907	-2577.56	-1109.42		58.9	-3.14142	-859.752		58.9	-501.648	-1806.99		58.9	-167.226	-4212.39		58.9	-2596.27	-2857
59	-4.36325	-115.732	-33.5933	-60.6834		59	-777.793	-2575.7	-1110.04		59	-3.14142	-850.722		59	-506.007	-1812.91		59	-169.094	-4218.61		59	-2601.56	-2861.67
59.1	-4.67463	-114.175	-32.3478	-61.6175		59.1	-776.547	-2567.6	-1108.8		59.1	-2.20728	-845.428		59.1	-507.564	-1812.28		59.1	-166.915	-4227.33		59.1	-2606.23	-2860.11
59.2	-0.0039196	-114.798	-23.9405	-61.6175		59.2	-786.2	-2557.01	-1104.13		59.2	-0.0276127	-850.411		59.2	-514.415	-1814.77		59.2	-164.735	-4242.9		59.2	-2601.56	-2863.53
59.3	-1.56082	-112.929	-31.1022	-61.9289		59.3	-785.578	-2566.67	-1095.72		59.3	-5.32108	-840.446		59.3	-516.594	-1824.74		59.3	-164.424	-4242.28		59.3	-2596.58	-2877.86
59.4	-2.49496	-120.714	-28.6112	-66.911		59.4	-787.757	-2558.26	-1101.64		59.4	-4.38694	-833.285		59.4	-517.528	-1835.95		59.4	-169.094	-4238.85		59.4	-2584.12	-2862.6
59.5	-4.98601	-119.157	-32.3478	-66.2883		59.5	-787.757	-2556.08	-1109.73		59.5	-2.20728	-831.728		59.5	-515.349	-1818.82		59.5	-172.208	-4255.05		59.5	-2584.12	-2876.61
59.6	-4.67463	-114.175	-28.6112	-68.1565		59.6	-782.152	-2553.28	-1102.57		59.6	-0.338993	-825.811		59.6	-508.187	-1808.86		59.6	-174.388	-4250.69		59.6	-2585.99	-2865.71
59.7	-4.36325	-114.175	-32.3478	-67.8452		59.7	-784.643	-2553.9	-1096.65		59.7	-2.51866	-829.859		59.7	-510.678	-1811.35		59.7	-173.765	-4250.38		59.7	-2585.68	-2854.5
59.8	-4.67463	-117.912	-24.5632	-60.0606		59.8	-786.823	-2550.47	-1103.82		59.8	-2.51866	-818.338		59.8	-514.726	-1818.82		59.8	-174.076	-4233.56		59.8	-2595.33	-2852.32
59.9	-5.92015	-117.6	-30.1681	-61.6175		59.9	-783.398	-2541.44	-1108.8		59.9	-2.20728	-796.542		59.9	-516.283	-1832.21		59.9	-171.274	-4220.17		59.9	-2601.25	-2856.37
60	-0.3153	-111.061	-32.6591	-65.9769		60	-787.446	-2556.08	-1110.35		60	-0.961755	-801.524		60	-510.989	-1825.36		60	-172.831	-4225.78		60	-2603.74	-2849.21
60.1	-6.23153	-111.373	-27.3657	-63.4858		60.1	-796.164	-2566.98	-1103.19		60.1	-1.8959	-831.105		60.1	-499.78	-1812.28		60.1	-175.945	-4213.01		60.1	-2597.82	-2866.03
60.2	-2.80635	-115.421	-28.6112	-60.372		60.2	-801.147	-2565.11	-1077.35		60.2	-4.38694	-840.446		60.2	-495.42	-1811.66		60.2	-172.519	-4209.27		60.2	-2596.89	-2867.58
60.3	-6.23153	-114.486	-32.3478	-62.8631		60.3	-789.937	-2557.01	-1075.48		60.3	-2.20728	-838.578		60.3	-499.468	-1820.69		60.3	-172.519	-4224.22		60.3	-2604.98	-2862.91
60.4	-4.05187	-110.127	-28.9226	-70.6476		60.4	-788.38	-2555.77	-1066.45		60.4	-2.83004	-832.35		60.4	-501.959	-1817.89		60.4	-169.094	-4207.09		60.4	-2609.03	-2864.47
60.5	-5.92015	-112.307	-27.0543	-69.0907		60.5	-787.134	-2551.72	-1057.11		60.5	-3.4528	-824.566		60.5	-497.289	-1823.18		60.5	-173.142	-4189.66		60.5	-2599.07	-2866.65
60.6	-5.60877	-102.654	-32.3478	-64.42		60.6	-787.757	-2547.98	-1064.27		60.6	-3.4528	-818.65		60.6	-493.241	-1836.57		60.6	-176.567	-4191.21		60.6	-2590.66	-2871.63
60.7	-1.56082	-103.277	-27.3657	-64.1086		60.7	-784.643	-2556.7	-1071.12		60.7	-4.69832	-830.482		60.7	-488.881	-1841.86		60.7	-180.304	-4194.02		60.7	-2592.53	-2860.42
60.8	0.618841	-106.702	-22.695	-66.2883		60.8	-786.823	-2555.46	-1077.04		60.8	-3.14142	-837.644		60.8	-483.588	-1815.09		60.8	-173.765	-4208.96		60.8	-2589.73	-2856.06
60.9	-3.11773	-112.929	-28.9226	-63.4858		60.9	-789.937	-2549.23	-1066.45		60.9	-6.25523	-824.877		60.9	-483.277	-1824.43		60.9	-175.322	-4206.16		60.9	-2592.53	-2859.17
61	-4.05187	-112.929	-21.4494	-59.7493		61	-784.643	-2552.97	-1055.86		61	-5.94384	-822.386		61	-493.241	-1816.95		61	-166.603	-4203.05		61	-2594.4	-2867.89
61.1	-2.80635	-113.241	-22.0722	-61.3062		61.1	-777.17	-2544.56	-1065.83		61.1	-5.0097	-820.829		61.1	-489.504	-1810.1		61.1	-159.441	-4208.65		61.1	-2594.09	-2868.52
61.2	-4.98601	-112.307	-27.0543	-61.6175		61.2	-769.697	-2542.07	-1096.65		61.2	-5.63246	-820.829		61.2	-490.438	-1801.07		61.2	-157.262	-4217.37		61.2	-2593.77	-2865.71
61.3	-5.92015	-110.438	-25.4974	-60.372		61.3	-781.218	-2542.07	-1098.52		61.3	-7.81213	-821.141		61.3	-490.127	-1796.09		61.3	-158.507	-4212.39		61.3	-2595.02	-2868.83
61.4	-3.74049	-116.977	-27.0543	-58.8151		61.4	-781.218	-2535.53	-1070.5		61.4	-7.50075	-833.596		61.4	-490.438	-1803.88		61.4	-162.244	-4216.44		61.4	-2595.64	-2875.06
61.5	-4.36325	-118.534	-26.1202	-58.8151		61.5	-789.003	-2543.62	-1054.31		61.5	-8.74627	-834.841		61.5	-486.39	-1807.3		61.5	-162.867	-4215.19		61.5	-2580.07	-2880.66
61.6	-9.03396	-113.864	-28.9226	-56.9468		61.6	-793.985	-2536.77	-1055.86		61.6	-8.74627	-833.285		61.6	-489.504	-1814.15		61.6	-167.849	-4215.81		61.6	-2569.18	-2883.46
61.7	-6.54291	-115.421	-28.6112	-54.1444		61.7	-784.955	-2532.73	-1057.73		61.7	-6.25523	-831.416		61.7	-499.468	-1806.68		61.7	-169.094	-4226.4		61.7	-2578.52	-2873.19
61.8	-6.23153	-116.043	-26.7429	-56.3241		61.8	-771.254	-2534.28	-1065.83		61.8	-1.27314	-838.267		61.8	-496.977	-1803.88		61.8	-162.244	-4217.99		61.8	-2577.27	-2864.16
61.9	-5.60877	-114.798	-27.3657	-59.1265		61.9	-774.056	-2524.63	-1071.43		61.9	-2.51866	-847.608		61.9	-494.486	-1811.35		61.9	-161.31	-4219.24		61.9	-2580.07	-2870.38
62	-9.03396	-117.6	-29.234	-56.6355		62	-782.775	-2518.71	-1068.94		62	-3.14142	-855.704		62	-502.894	-1802.32		62	-155.705	-4215.5		62	-2579.14	-2878.79
62.1	-6.85429	-117.912	-30.1681	-55.7013		62.1	-783.709	-2522.45	-1064.89		62.1	-3.14142	-839.201		62.1	-507.564	-1807.61		62.1	-148.854	-4188.41		62.1	-2574.78	-2889.69
62.2	-8.72258	-116.666	-23.3177	-52.2761		62.2	-790.248	-2526.19	-1069.56		62.2	-5.63246	-832.662		62.2	-502.271	-1812.59		62.2	-150.723	-4213.01		62.2	-2570.11	-2890
62.3	-3.74049	-116.043	-22.3836	-51.6534		62.3	-779.661	-2534.28	-1055.86		62.3	-1.8959	-846.363		62.3	-497.289	-1813.84		62.3	-152.591	-4231.07		62.3	-2568.24	-2881.91
62.4	-1.24944	-119.157	-26.7429	-54.4558		62.4	-774.679	-2538.33	-1054.31		62.4	-6.87799	-848.231		62.4	-488.259	-1807.3		62.4	-156.95	-4230.14		62.4	-2570.11	-2873.19
62.5	0.307461	-117.289	-30.1681	-50.0965		62.5	-775.613	-2535.22	-1045.28		62.5	-6.25523	-866.291		62.5	-485.768	-1808.86		62.5	-150.1	-4239.79		62.5	-2566.37	-2866.03
62.6	-2.80635	-111.995	-27.3657	-45.1144		62.6	-782.775	-2527.74	-1036.56		62.6	-2.20728	-873.453		62.6	-480.474	-1806.37		62.6	-150.1	-4234.81		62.6	-2562.95	-2867.58
62.7	-4.36325	-111.995	-26.4315	-49.4737		62.7	-770.008	-2524.01	-1046.52		62.7	-3.14142	-875.632		62.7	-480.785	-1823.18		62.7	-153.837	-4232.32		62.7	-2570.73	-2883.46
62.8	-2.49496	-111.373	-23.3177	-49.4737		62.8	-766.583	-2516.53	-1052.13		62.8	-8.74627	-863.177		62.8	-482.031	-1829.72		62.8	-156.639	-4237.92		62.8	-2574.16	-2881.28
62.9	-4.05187	-107.947	-25.8088	-46.6713		62.9	-760.978	-2512.17	-1037.49		62.9	-8.12351	-869.405		62.9	-478.917	-1819.13		62.9	-155.393	-4232.32		62.9	-2575.09	-2871.94
63	-4.98601	-104.834	-27.3657	-44.803		63	-773.434	-2511.55	-1042.79		63	-7.50075	-866.602		63	-484.833	-1809.17		63	-158.507	-4227.33		63	-2573.85	-2862.29
63.1	-7.47705	-113.864	-26.1202	-51.6534		63.1	-773.122	-2518.4	-1045.59		63.1	-9.05765	-863.177		63.1	-487.324	-1812.91		63.1	-167.849	-4218.61		63.1	-2567.31	-2860.42
63.2	-6.23153	-117.912	-25.4974	-46.0485		63.2	-765.649	-2515.29	-1039.67		63.2	-0.961755	-850.099		63.2	-485.145	-1824.43		63.2	-168.783	-4219.86		63.2	-2563.88	-2853.88
63.3	-5.29739	-118.223	-22.3836	-50.4078		63.3	-767.517	-2511.24	-1042.79		63.3	-0.338993	-841.38		63.3	-484.522	-1811.35		63.3	-161.932	-4242.28		63.3	-2557.97	-2851.39
63.4	-9.65672	-118.223	-22.3836	-52.5875		63.4	-772.5	-2508.44	-1049.32		63.4	-1.8959	-843.249		63.4	-482.342	-1816.95		63.4	-160.376	-4256.29		63.4	-2563.88	-2855.44
63.5	-6.23153	-121.96	-25.186	-54.7672		63.5	-774.679	-2503.77	-1058.35		63.5	-2.51866	-838.578		63.5	-474.246	-1828.16		63.5	-164.112	-4249.75		63.5	-2568.55	-2859.8
63.6	-5.60877	-121.648	-24.8746	-55.0786		63.6	-771.877	-2505.95	-1060.22		63.6	-2.83004	-841.692		63.6	-475.803	-1814.15		63.6	-164.424	-4240.1		63.6	-2560.15	-2846.41
63.7	-2.80635	-117.6	-27.9884	-57.2582		63.7	-759.11	-2511.86	-1072.68		63.7	-2.83004	-859.129		63.7	-475.181	-1826.61		63.7	-161.932	-4240.41		63.7	-2550.18	-2843.29
63.8	-5.29739	-126.63	-28.2998	-61.3062		63.8	-755.685	-2516.22	-1066.14		63.8	-4.07556	-857.261		63.8	-472.69	-1833.77		63.8	-160.998	-4227.02		63.8	-2552.36	-2843.61
63.9	-7.78844	-116.666	-26.7429	-55.3899		63.9	-765.026	-2524.63	-1068.01		63.9	-0.0276127	-849.788		63.9	-471.755	-1829.1		63.9	-160.376	-4218.61		63.9	-2550.18	-2845.16
64	-7.47705	-105.145	-26.4315	-53.833		64	-755.685	-2510.62	-1058.04		64	0.595149	-843.56		64	-477.36	-1819.13		64	-162.244	-4225.78		64	-2549.87	-2848.28
64.1	-5.29739	-95.8036	-25.4974	-59.7493		64.1	-753.817	-2507.19	-1045.9		64.1	-6.56661	-850.411		64.1	-479.229	-1807.61		64.1	-165.669	-4220.17		64.1	-2547.07	-2859.8
64.2	-7.16568	-101.408	-32.6591	-58.8151		64.2	-749.146	-2498.78	-1038.43		64.2	-3.14142	-861.309		64.2	-472.378	-1795.16		64.2	-164.735	-4229.2		64.2	-2531.81	-2867.27
64.3	-4.36325	-105.768	-27.0543	-56.0127		64.3	-751.014	-2495.67	-1044.96		64.3	-2.20728	-851.656		64.3	-470.51	-1781.46		64.3	-164.424	-4216.44		64.3	-2524.96	-2851.39
64.4	-5.92015	-106.702	-27.9884	-57.881		64.4	-759.11	-2490.69	-1054.62		64.4	-1.58452	-853.524		64.4	-481.408	-1781.15		64.4	-169.406	-4213.94		64.4	-2533.68	-2864.47
64.5	-5.92015	-110.127	-30.1681	-59.4379		64.5	-758.487	-2493.8	-1055.86		64.5	-4.07556	-855.704		64.5	-488.881	-1790.18		64.5	-166.292	-4190.28		64.5	-2530.88	-2867.27
64.6	-4.36325	-113.552	-28.6112	-61.6175		64.6	-750.08	-2499.1	-1033.76		64.6	-3.4528	-863.177		64.6	-482.965	-1791.73		64.6	-162.244	-4188.72		64.6	-2528.07	-2848.28
64.7	-6.54291	-111.373	-29.234	-64.1086		64.7	-755.685	-2501.9	-1016.63		64.7	-2.20728	-874.075		64.7	-480.163	-1789.86		64.7	-162.867	-4189.66		64.7	-2535.86	-2845.47
64.8	-7.47705	-112.307	-24.5632	-57.5696		64.8	-750.08	-2497.54	-1020.68		64.8	0.595149	-864.423		64.8	-481.72	-1804.81		64.8	-162.244	-4198.38		64.8	-2533.06	-2860.42
64.9	-6.54291	-106.39	-27.9884	-50.0965		64.9	-749.769	-2488.51	-1012.27		64.9	-3.14142	-862.866		64.9	-476.426	-1797.34		64.9	-162.244	-4208.96		64.9	-2522.78	-2862.29
65	-4.05187	-107.947	-28.9226	-57.5696		65	-743.23	-2479.17	-1016.63		65	-8.74627	-868.159		65	-478.606	-1798.58		65	-165.046	-4219.55		65	-2520.29	-2848.28
65.1	-4.05187	-107.325	-25.186	-59.1265		65.1	-731.086	-2486.02	-1034.07		65.1	-9.05765	-860.997		65.1	-472.378	-1796.71		65.1	-161.621	-4220.48		65.1	-2524.34	-2847.97
65.2	-5.92015	-102.031	-28.9226	-58.8151		65.2	-737.002	-2492.87	-1024.41		65.2	-4.38694	-852.279		65.2	-468.33	-1788.62		65.2	-161.621	-4194.33		65.2	-2521.53	-2855.44
65.3	-5.29739	-103.899	-27.9884	-59.7493		65.3	-736.379	-2487.89	-1033.44		65.3	-5.94384	-866.914		65.3	-472.378	-1790.49		65.3	-164.112	-4194.95		65.3	-2510.01	-2845.47
65.4	-2.80635	-108.259	-31.725	-63.4858		65.4	-732.954	-2486.33	-1028.46		65.4	-5.94384	-868.782		65.4	-473.001	-1788.93		65.4	-166.292	-4217.37		65.4	-2512.82	-2837.38
65.5	-6.23153	-107.947	-32.9705	-62.2403		65.5	-731.709	-2480.1	-1016.94		65.5	-5.32108	-858.195		65.5	-479.229	-1794.22		65.5	-158.819	-4202.11		65.5	-2517.49	-2849.21
65.6	-6.54291	-107.325	-30.4795	-59.1265		65.6	-740.739	-2473.87	-1009.78		65.6	-1.8959	-855.704		65.6	-478.917	-1799.83		65.6	-162.867	-4188.1		65.6	-2523.4	-2840.18
65.7	-1.56082	-109.193	-25.8088	-56.3241		65.7	-742.296	-2468.27	-1008.22		65.7	-2.51866	-850.099		65.7	-479.851	-1806.99		65.7	-168.471	-4161.63		65.7	-2533.99	-2843.61
65.8	-1.8722	-116.977	-32.0364	-54.1444		65.8	-735.445	-2471.38	-1003.55		65.8	-4.69832	-843.249		65.8	-481.097	-1806.99		65.8	-166.603	-4167.86		65.8	-2523.4	-2845.79
65.9	-4.05187	-118.534	-34.216	-51.0306		65.9	-732.02	-2472.01	-998.258		65.9	-5.94384	-840.446		65.9	-479.851	-1808.86		65.9	-169.406	-4172.84		65.9	-2513.44	-2841.43
66	-3.42911	-114.175	-33.2819	-54.7672		66	-733.577	-2459.55	-1014.14		66	-4.38694	-821.763		66	-478.606	-1803.88		66	-167.849	-4183.74		66	-2512.82	-2840.49
66.1	-5.29739	-102.654	-29.234	-56.3241		66.1	-735.757	-2463.91	-1011.02		66.1	-2.51866	-824.255		66.1	-481.72	-1798.58		66.1	-167.226	-4207.41		66.1	-2521.22	-2831.77
66.2	-4.67463	-111.373	-31.725	-56.3241		66.2	-737.936	-2454.26	-1000.75		66.2	-5.94384	-842.626		66.2	-484.522	-1796.4		66.2	-166.603	-4223.29		66.2	-2512.5	-2830.53
66.3	-6.85429	-109.816	-31.1022	-52.8989		66.3	-737.002	-2457.37	-997.946		66.3	-8.12351	-835.776		66.3	-480.474	-1811.04		66.3	-176.256	-4210.83		66.3	-2507.52	-2830.53
66.4	-3.11773	-113.864	-31.725	-51.342		66.4	-729.84	-2450.21	-1002.31		66.4	-6.25523	-833.596		66.4	-475.181	-1803.56		66.4	-171.585	-4180.31		66.4	-2512.82	-2845.79
66.5	-5.29739	-114.486	-27.0543	-52.2761		66.5	-736.068	-2451.45	-1002.93		66.5	-5.63246	-837.955		66.5	-470.821	-1807.92		66.5	-160.376	-4166.3		66.5	-2521.53	-2850.46
66.6	-5.29739	-115.109	-31.1022	-51.9647		66.6	-733.888	-2436.2	-1003.55		66.6	-9.05765	-828.925		66.6	-475.492	-1815.4		66.6	-155.705	-4163.5		66.6	-2514.68	-2846.41
66.7	-7.47705	-123.205	-34.216	-51.0306		66.7	-729.218	-2432.46	-1013.2		66.7	-5.63246	-833.596		66.7	-470.199	-1817.89		66.7	-155.393	-4167.55		66.7	-2513.44	-2840.18
66.8	-5.60877	-129.744	-36.0843	-50.4078		66.8	-730.152	-2428.72	-1001.99		66.8	-5.94384	-841.069		66.8	-467.085	-1797.34		66.8	-158.196	-4182.81		66.8	-2519.67	-2843.92
66.9	-4.98601	-125.696	-32.6591	-48.2282		66.9	-731.709	-2436.82	-987.982		66.9	-10.6146	-839.512		66.9	-467.396	-1805.74		66.9	-161.621	-4180.31		66.9	-2525.89	-2845.47
67	-4.05187	-119.468	-34.5274	-45.1144		67	-734.2	-2436.82	-1005.73		67	-8.12351	-835.153		67	-468.33	-1808.24		67	-164.735	-4175.64		67	-2513.44	-2858.86
67.1	-4.05187	-117.289	-36.0843	-48.5396		67.1	-726.727	-2435.89	-1015.07		67.1	-12.1715	-823.009		67.1	-475.803	-1804.19		67.1	-168.783	-4183.74		67.1	-2505.34	-2859.8
67.2	-3.11773	-122.271	-35.1502	-48.5396		67.2	-732.331	-2432.77	-1011.34		67.2	-14.9739	-824.566		67.2	-475.803	-1801.7		67.2	-174.699	-4175.02		67.2	-2500.36	-2857
67.3	-0.3153	-116.666	-33.5933	-44.1802		67.3	-738.559	-2422.81	-1006.98		67.3	-12.4828	-828.302		67.3	-467.707	-1797.96		67.3	-171.897	-4174.71		67.3	-2494.44	-2846.72
67.4	-0.0039196	-109.193	-32.6591	-48.2282		67.4	-744.787	-2420.01	-1004.49		67.4	-10.6146	-813.356		67.4	-464.905	-1805.74		67.4	-177.19	-4163.81		67.4	-2500.05	-2843.61
67.5	0.618841	-105.145	-34.216	-51.342		67.5	-744.164	-2412.53	-1006.98		67.5	-10.6146	-816.159		67.5	-467.396	-1796.09		67.5	-178.747	-4178.76		67.5	-2488.84	-2842.05
67.6	0.618841	-105.768	-28.6112	-59.1265		67.6	-728.595	-2414.09	-1004.17		67.6	-11.2373	-826.746		67.6	-465.216	-1799.52		67.6	-175.633	-4196.2		67.6	-2514.06	-2842.98
67.7	-1.56082	-105.768	-32.3478	-57.881		67.7	-727.349	-2414.09	-1013.83		67.7	-11.5487	-830.171		67.7	-462.103	-1799.21		67.7	-168.783	-4196.51		67.7	-2524.03	-2848.9
67.8	-1.56082	-102.965	-31.725	-52.8989		67.8	-737.936	-2415.02	-1005.42		67.8	-14.0397	-827.057		67.8	-460.546	-1788		67.8	-167.849	-4202.11		67.8	-2519.35	-2849.83
67.9	3.42127	-101.097	-33.2819	-51.6534		67.9	-730.152	-2412.22	-1011.65		67.9	-11.2373	-827.368		67.9	-462.414	-1797.96		67.9	-168.16	-4207.09		67.9	-2516.55	-2841.43
68	1.86436	-100.474	-34.5274	-56.6355		68	-728.595	-2411.6	-1006.98		68	-11.2373	-817.404		68	-462.725	-1806.37		68	-169.406	-4210.83		68	-2515	-2843.61
68.1	-1.24944	-110.127	-34.8388	-56.6355		68.1	-735.757	-2406.93	-999.192		68.1	-7.18937	-814.913		68.1	-466.151	-1820.38		68.1	-168.16	-4210.52		68.1	-2517.17	-2834.26
68.2	-1.24944	-111.995	-37.9526	-56.3241		68.2	-735.134	-2396.03	-987.982		68.2	-9.36903	-820.518		68.2	-462.414	-1806.06		68.2	-172.519	-4203.05		68.2	-2512.82	-2831.15
68.3	1.55298	-107.947	-42.6233	-58.5037		68.3	-732.954	-2399.77	-990.162		68.3	-8.43489	-815.536		68.3	-453.695	-1803.56		68.3	-180.927	-4218.3		68.3	-2516.86	-2838.31
68.4	1.55298	-112.618	-41.6892	-55.0786		68.4	-737.936	-2407.55	-983.934		68.4	-6.56661	-808.686		68.4	-452.138	-1802.01		68.4	-180.615	-4217.99		68.4	-2507.21	-2828.97
68.5	-1.24944	-112.307	-41.6892	-58.1924		68.5	-730.463	-2408.17	-973.97		68.5	-4.38694	-803.392		68.5	-449.336	-1810.73		68.5	-174.076	-4188.41		68.5	-2511.57	-2823.37
68.6	-1.8722	-111.373	-42.9347	-57.2582		68.6	-733.266	-2400.08	-968.054		68.6	-2.20728	-799.967		68.6	-448.713	-1813.84		68.6	-170.028	-4190.59		68.6	-2499.43	-2833.95
68.7	2.48713	-111.373	-41.6892	-54.7672		68.7	-740.739	-2385.13	-963.072		68.7	-4.07556	-811.799		68.7	-457.432	-1792.67		68.7	-162.867	-4195.57		68.7	-2485.41	-2836.13
68.8	-2.80635	-105.145	-41.6892	-57.2582		68.8	-734.822	-2386.38	-978.329		68.8	-5.63246	-811.177		68.8	-460.857	-1793.91		68.8	-153.214	-4210.21		68.8	-2479.19	-2848.59
68.9	-0.3153	-105.768	-42.6233	-55.0786		68.9	-738.248	-2382.02	-978.641		68.9	-5.63246	-830.794		68.9	-456.498	-1788		68.9	-155.082	-4212.39		68.9	-2489.46	-2848.59
69	-0.3153	-106.702	-42.6233	-57.5696		69	-737.936	-2375.17	-980.509		69	-6.25523	-839.201		69	-461.791	-1790.8		69	-162.867	-4190.59		69	-2488.22	-2846.1
69.1	0.930222	-111.684	-38.264	-57.2582		69.1	-732.643	-2379.21	-981.132		69.1	-8.43489	-858.818		69.1	-467.707	-1808.55		69.1	-163.801	-4198.38		69.1	-2483.86	-2847.03
69.2	-0.938061	-113.552	-37.6412	-54.1444		69.2	-733.266	-2378.59	-974.904		69.2	-9.05765	-862.554		69.2	-458.366	-1820.69		69.2	-154.459	-4204.6		69.2	-2481.99	-2838.94
69.3	-5.60877	-118.223	-37.3299	-56.6355		69.3	-749.457	-2370.81	-975.527		69.3	-6.87799	-860.063		69.3	-457.432	-1806.99		69.3	-154.459	-4208.96		69.3	-2476.07	-2828.66
69.4	-1.56082	-114.175	-33.5933	-55.7013		69.4	-734.822	-2378.28	-980.509		69.4	-8.74627	-856.015		69.4	-458.055	-1794.85		69.4	-159.753	-4202.11		69.4	-2469.84	-2830.22
69.5	-0.0039196	-109.816	-32.6591	-54.4558		69.5	-722.367	-2381.08	-965.251		69.5	-8.12351	-857.572		69.5	-461.169	-1801.07		69.5	-165.98	-4194.02		69.5	-2473.27	-2850.14
69.6	-4.67463	-110.438	-41.6892	-51.6534		69.6	-731.397	-2382.95	-972.724		69.6	-8.12351	-854.458		69.6	-460.857	-1802.01		69.6	-175.633	-4191.52		69.6	-2470.78	-2840.18
69.7	-3.74049	-112.929	-35.4616	-51.9647		69.7	-733.888	-2384.82	-981.132		69.7	-10.3032	-851.345		69.7	-457.121	-1792.35		69.7	-171.897	-4213.32		69.7	-2467.67	-2843.29
69.8	-2.18358	-121.337	-38.8868	-52.5875		69.8	-734.511	-2392.92	-984.557		69.8	-11.2373	-866.291		69.8	-462.103	-1796.71		69.8	-171.274	-4226.4		69.8	-2480.12	-2840.8
69.9	-4.05187	-120.403	-44.803	-49.1623		69.9	-729.84	-2391.67	-982.066		69.9	-9.36903	-871.273		69.9	-455.564	-1797.03		69.9	-170.651	-4227.02		69.9	-2476.07	-2843.29
70	0.930222	-123.205	-38.264	-49.7851		70	-733.266	-2375.48	-995.144		70	-8.43489	-865.357		70	-447.468	-1796.71		70	-172.831	-4210.52		70	-2473.27	-2842.36
70.1	1.86436	-122.894	-37.3299	-48.2282		70.1	-731.709	-2372.36	-978.018		70.1	-4.07556	-878.435		70.1	-453.073	-1791.11		70.1	-178.124	-4184.67		70.1	-2477.32	-2862.91
70.2	-3.74049	-121.96	-40.4437	-52.5875		70.2	-726.727	-2373.61	-971.168		70.2	-5.32108	-886.219		70.2	-454.63	-1800.14		70.2	-175.945	-4194.95		70.2	-2477.32	-2859.17
70.3	4.66679	-121.96	-35.4616	-52.2761		70.3	-725.481	-2378.28	-977.084		70.3	-7.81213	-883.105		70.3	-461.48	-1802.32		70.3	-181.238	-4213.63		70.3	-2480.43	-2855.13
70.4	-0.0039196	-116.355	-34.8388	-49.7851		70.4	-720.499	-2373.61	-987.048		70.4	-7.50075	-882.794		70.4	-456.809	-1807.61		70.4	-179.681	-4185.61		70.4	-2472.02	-2853.88
70.5	2.79851	-105.456	-35.4616	-47.294		70.5	-720.499	-2364.27	-989.85		70.5	-5.0097	-892.758		70.5	-450.893	-1803.25		70.5	-171.897	-4159.14		70.5	-2465.49	-2843.61
70.6	-2.18358	-102.343	-30.1681	-46.6713		70.6	-720.188	-2353.68	-985.18		70.6	-6.87799	-876.566		70.6	-454.941	-1790.18		70.6	-166.915	-4165.99		70.6	-2471.09	-2864.16
70.7	0.930222	-104.211	-30.4795	-50.7192		70.7	-720.499	-2344.65	-983.311		70.7	-5.94384	-876.878		70.7	-457.743	-1795.78		70.7	-175.01	-4175.64		70.7	-2466.11	-2872.25
70.8	1.2416	-99.2287	-32.9705	-50.0965		70.8	-727.349	-2355.55	-986.737		70.8	-8.43489	-883.728		70.8	-449.336	-1808.24		70.8	-170.34	-4172.53		70.8	-2452.41	-2867.89
70.9	0.930222	-97.9832	-29.5453	-51.9647		70.9	-730.463	-2370.18	-978.641		70.9	-8.74627	-889.022		70.9	-453.384	-1804.19		70.9	-161.621	-4163.5		70.9	-2462.37	-2853.57
71	0.618841	-103.588	-27.0543	-54.4558		71	-735.134	-2364.27	-967.742		71	-9.36903	-883.105		71	-444.043	-1803.25		71	-166.603	-4164.75		71	-2472.96	-2839.87
71.1	-1.24944	-104.211	-32.6591	-52.8989		71.1	-737.002	-2365.83	-962.449		71.1	-3.14142	-856.95		71.1	-444.043	-1799.52		71.1	-171.897	-4145.75		71.1	-2465.49	-2854.5
71.2	3.42127	-101.72	-32.3478	-55.3899		71.2	-741.673	-2372.05	-966.497		71.2	-6.25523	-843.872		71.2	-448.402	-1804.5		71.2	-165.046	-4152.6		71.2	-2443.38	-2871.63
71.3	-1.24944	-105.145	-32.0364	-57.5696		71.3	-724.547	-2365.2	-958.09		71.3	-9.36903	-846.051		71.3	-440.306	-1789.55		71.3	-161.621	-4170.66		71.3	-2439.95	-2865.4
71.4	-0.0039196	-103.277	-31.725	-57.881		71.4	-715.206	-2353.37	-949.994		71.4	-9.99179	-867.225		71.4	-439.06	-1788		71.4	-153.525	-4160.08		71.4	-2442.75	-2844.85
71.5	0.930222	-102.965	-28.6112	-55.3899		71.5	-713.96	-2347.45	-964.006		71.5	-12.1715	-871.584		71.5	-444.043	-1791.11		71.5	-156.016	-4165.68		71.5	-2438.71	-2847.65
71.6	-1.8722	-108.259	-31.1022	-52.2761		71.6	-722.679	-2347.14	-961.826		71.6	-11.5487	-873.453		71.6	-446.534	-1783.32		71.6	-156.95	-4161.01		71.6	-2439.64	-2845.79
71.7	-0.62668	-106.702	-31.4136	-49.4737		71.7	-727.661	-2338.42	-960.269		71.7	-8.43489	-857.261		71.7	-446.534	-1787.68		71.7	-156.328	-4184.67		71.7	-2447.74	-2843.29
71.8	1.86436	-114.175	-34.8388	-53.2103		71.8	-716.451	-2333.44	-965.874		71.8	-5.63246	-854.77		71.8	-444.043	-1794.22		71.8	-152.591	-4166.93		71.8	-2449.29	-2848.28
71.9	0.930222	-106.702	-39.5095	-55.0786		71.9	-709.912	-2329.08	-973.347		71.9	-8.74627	-852.902		71.9	-441.552	-1790.8		71.9	-155.705	-4169.73		71.9	-2452.41	-2863.53
72	-0.3153	-97.3605	-37.3299	-53.5216		72	-717.385	-2326.9	-968.054		72	-9.05765	-850.099		72	-440.306	-1784.26		72	-156.016	-4184.99		72	-2443.38	-2856.68
72.1	4.66679	-93.9353	-31.4136	-56.0127		72.1	-707.11	-2320.36	-958.712		72.1	-6.56661	-851.656		72.1	-436.258	-1783.01		72.1	-156.639	-4191.52		72.1	-2440.26	-2841.74
72.2	0.307461	-91.7556	-30.1681	-49.7851		72.2	-708.044	-2316	-959.958		72.2	-4.07556	-844.806		72.2	-431.587	-1781.77		72.2	-159.753	-4166.61		72.2	-2429.05	-2839.87
72.3	-1.56082	-91.1328	-33.5933	-48.5396		72.3	-710.846	-2328.77	-956.221		72.3	-6.25523	-833.285		72.3	-430.342	-1776.47		72.3	-161.31	-4156.96		72.3	-2436.22	-2846.72
72.4	-6.85429	-97.0491	-37.0185	-48.8509		72.4	-713.026	-2340.29	-961.203		72.4	-3.76418	-832.35		72.4	-425.982	-1779.9		72.4	-162.555	-4181.25		72.4	-2443.38	-2845.79
72.5	-3.42911	-98.2946	-29.8567	-47.294		72.5	-713.649	-2333.13	-957.778		72.5	-7.81213	-827.991		72.5	-429.408	-1778.03		72.5	-169.717	-4177.82		72.5	-2443.38	-2834.26
72.6	-4.67463	-98.9174	-36.7071	-46.9827		72.6	-711.78	-2324.72	-967.12		72.6	-9.99179	-837.021		72.6	-436.881	-1799.83		72.6	-163.489	-4166.93		72.6	-2448.05	-2839.56
72.7	-6.85429	-101.408	-33.2819	-50.4078		72.7	-714.271	-2316	-965.874		72.7	-8.43489	-850.722		72.7	-437.192	-1801.07		72.7	-160.687	-4189.66		72.7	-2451.47	-2843.29
72.8	-6.23153	-93.0011	-36.3957	-51.0306		72.8	-710.223	-2320.05	-953.419		72.8	-13.1056	-838.267		72.8	-436.881	-1795.16		72.8	-161.621	-4186.54		72.8	-2450.23	-2845.47
72.9	-8.72258	-86.4621	-36.7071	-49.1623		72.9	-709.912	-2325.97	-969.922		72.9	-10.9259	-832.35		72.9	-436.258	-1788.31		72.9	-161.932	-4197.75		72.9	-2443.69	-2846.41
73	-2.80635	-87.3963	-36.0843	-46.6713		73	-712.092	-2334.69	-961.826		73	-9.36903	-830.482		73	-437.504	-1819.13		73	-160.376	-4201.49		73	-2436.22	-2844.85
73.1	0.930222	-89.8873	-35.1502	-49.4737		73.1	-702.128	-2330.02	-968.677		73.1	-7.81213	-824.566		73.1	-437.815	-1818.82		73.1	-160.687	-4190.28		73.1	-2435.59	-2840.49
73.2	-1.24944	-92.6898	-33.5933	-54.4558		73.2	-691.229	-2321.3	-974.904		73.2	-11.8601	-816.781		73.2	-434.078	-1802.01		73.2	-158.819	-4171.6		73.2	-2442.75	-2840.18
73.3	-0.3153	-83.6597	-37.9526	-54.1444		73.3	-701.816	-2325.66	-965.874		73.3	-12.4828	-823.32		73.3	-432.833	-1791.73		73.3	-165.98	-4173.78		73.3	-2442.13	-2838.94
73.4	-3.11773	-86.4621	-37.6412	-56.9468		73.4	-708.044	-2325.35	-967.742		73.4	-12.1715	-824.255		73.4	-432.833	-1798.89		73.4	-170.028	-4180.94		73.4	-2459.57	-2836.13
73.5	-2.80635	-95.1808	-34.5274	-59.1265		73.5	-697.457	-2330.33	-972.102		73.5	-11.2373	-829.237		73.5	-436.569	-1789.86		73.5	-170.028	-4196.51		73.5	-2450.23	-2834.26
73.6	-3.11773	-93.6239	-36.7071	-54.1444		73.6	-699.014	-2331.88	-963.072		73.6	-11.5487	-828.302		73.6	-442.486	-1802.32		73.6	-165.669	-4189.34		73.6	-2443.07	-2844.54
73.7	-3.74049	-102.965	-36.7071	-54.4558		73.7	-704.93	-2335.93	-964.94		73.7	-11.2373	-815.224		73.7	-442.797	-1805.74		73.7	-173.142	-4181.25		73.7	-2437.15	-2845.47
73.8	-1.8722	-97.3605	-36.3957	-54.4558		73.8	-703.996	-2338.74	-964.629		73.8	-7.18937	-826.434		73.8	-440.306	-1797.34		73.8	-175.633	-4196.2		73.8	-2437.15	-2840.18
73.9	-2.80635	-98.606	-39.8209	-52.5875		73.9	-702.128	-2331.26	-971.479		73.9	-8.43489	-822.075		73.9	-437.504	-1809.17		73.9	-177.19	-4189.97		73.9	-2429.68	-2831.15
74	-2.18358	-104.522	-33.5933	-53.2103		74	-705.553	-2336.24	-968.054		74	-11.2373	-814.602		74	-438.126	-1803.25		74	-179.681	-4173.46		74	-2440.89	-2844.85
74.1	-2.18358	-105.456	-35.1502	-52.8989		74.1	-699.636	-2342.16	-966.185		74.1	-8.12351	-823.32		74.1	-438.126	-1804.19		74.1	-178.124	-4169.1		74.1	-2437.15	-2843.29
74.2	-4.05187	-100.474	-37.3299	-56.0127		74.2	-692.786	-2340.6	-975.216		74.2	-9.05765	-840.135		74.2	-437.192	-1785.82		74.2	-174.388	-4182.18		74.2	-2438.71	-2841.43
74.3	-0.3153	-98.606	-32.6591	-50.7192		74.3	-694.966	-2329.71	-962.76		74.3	-7.50075	-843.249		74.3	-437.192	-1801.7		74.3	-179.681	-4162.57		74.3	-2447.11	-2845.47
74.4	-2.49496	-101.408	-33.9047	-53.833		74.4	-699.636	-2311.65	-930.065		74.4	-2.83004	-841.069		74.4	-435.635	-1811.35		74.4	-169.717	-4165.99		74.4	-2449.61	-2835.51
74.5	-2.18358	-101.097	-35.773	-54.4558		74.5	-705.553	-2309.78	-934.425		74.5	-5.63246	-833.596		74.5	-437.192	-1798.89		74.5	-158.819	-4159.45		74.5	-2446.49	-2829.59
74.6	-4.98601	-95.8036	-30.4795	-52.5875		74.6	-710.223	-2312.58	-953.73		74.6	-6.87799	-833.596		74.6	-436.258	-1792.98		74.6	-154.148	-4152.91		74.6	-2445.25	-2834.58
74.7	-2.49496	-91.7556	-32.9705	-53.5216		74.7	-711.78	-2318.5	-962.76		74.7	-5.94384	-847.919		74.7	-434.701	-1783.32		74.7	-163.801	-4160.08		74.7	-2437.15	-2843.92
74.8	-7.16568	-93.3125	-36.0843	-61.3062		74.8	-713.649	-2310.09	-961.203		74.8	-9.05765	-839.512		74.8	-431.899	-1775.54		74.8	-172.831	-4139.21		74.8	-2439.95	-2847.65
74.9	-7.78844	-93.6239	-29.8567	-61.3062		74.9	-714.583	-2303.24	-965.874		74.9	-3.76418	-828.302		74.9	-424.426	-1785.5		74.9	-171.585	-4131.74		74.9	-2437.77	-2851.39
75	-1.8722	-94.558	-36.7071	-58.1924		75	-714.583	-2304.79	-961.826		75	-5.94384	-825.189		75	-425.048	-1787.37		75	-167.537	-4140.77		75	-2439.33	-2856.37
75.1	-3.74049	-98.606	-33.9047	-56.6355		75.1	-709.289	-2301.06	-942.832		75.1	-4.07556	-818.65		75.1	-422.869	-1794.85		75.1	-165.98	-4128		75.1	-2427.81	-2862.91
75.2	-0.0039196	-100.474	-33.5933	-52.8989		75.2	-716.451	-2292.03	-950.305		75.2	-7.50075	-807.751		75.2	-427.228	-1795.78		75.2	-164.112	-4112.75		75.2	-2419.09	-2855.44
75.3	-0.3153	-107.013	-36.3957	-46.9827		75.3	-710.846	-2286.73	-953.73		75.3	-6.87799	-803.703		75.3	-425.36	-1804.81		75.3	-155.393	-4118.97		75.3	-2417.22	-2831.46
75.4	-4.36325	-104.522	-34.8388	-53.2103		75.4	-711.158	-2283.31	-956.533		75.4	-8.74627	-791.871		75.4	-418.509	-1810.41		75.4	-157.885	-4122.71		75.4	-2418.47	-2822.43
75.5	-4.36325	-100.786	-32.9705	-52.2761		75.5	-718.942	-2286.73	-956.844		75.5	-9.05765	-791.56		75.5	-415.707	-1823.18		75.5	-151.657	-4147.93		75.5	-2424.69	-2825.23
75.6	-1.24944	-98.2946	-32.0364	-55.7013		75.6	-713.026	-2285.49	-943.143		75.6	-8.12351	-806.194		75.6	-419.755	-1808.55		75.6	-146.986	-4167.86		75.6	-2410.06	-2834.89
75.7	-4.98601	-100.474	-33.5933	-61.9289		75.7	-709.601	-2285.18	-944.7		75.7	-9.99179	-810.242		75.7	-422.869	-1802.01		75.7	-137.956	-4173.46		75.7	-2400.72	-2846.1
75.8	-6.23153	-98.606	-36.3957	-66.911		75.8	-707.732	-2284.24	-952.485		75.8	-8.43489	-806.194		75.8	-421.935	-1804.81		75.8	-142.938	-4177.2		75.8	-2393.87	-2841.11
75.9	-4.05187	-98.606	-34.5274	-64.7314		75.9	-705.864	-2282.06	-949.371		75.9	-9.99179	-802.147		75.9	-414.461	-1808.55		75.9	-146.986	-4175.33		75.9	-2398.54	-2828.97
76	-4.36325	-100.786	-28.6112	-65.9769		76	-709.601	-2281.75	-939.718		76	-5.94384	-794.673		76	-416.641	-1819.44		76	-152.902	-4185.3		76	-2407.88	-2830.22
76.1	-2.18358	-104.522	-32.9705	-58.5037		76.1	-699.014	-2271.48	-936.916		76.1	-5.63246	-810.554		76.1	-419.444	-1821		76.1	-153.837	-4176.58		76.1	-2405.7	-2832.71
76.2	-4.67463	-103.277	-40.1323	-59.4379		76.2	-698.08	-2264.63	-950.616		76.2	-1.58452	-811.799		76.2	-418.198	-1824.12		76.2	-150.411	-4158.52		76.2	-2400.1	-2833.64
76.3	-2.49496	-103.277	-38.5754	-53.833		76.3	-699.325	-2269.92	-954.976		76.3	-5.32108	-802.769		76.3	-417.575	-1816.95		76.3	-140.759	-4151.04		76.3	-2400.1	-2827.73
76.4	-4.67463	-103.899	-41.3778	-53.833		76.4	-704.307	-2269.3	-949.994		76.4	-4.07556	-804.949		76.4	-419.444	-1823.18		76.4	-141.693	-4154.16		76.4	-2400.41	-2826.17
76.5	-4.67463	-100.786	-36.3957	-60.372		76.5	-709.289	-2269.3	-946.88		76.5	-4.07556	-804.638		76.5	-412.593	-1821.62		76.5	-139.513	-4158.83		76.5	-2408.19	-2823.68
76.6	1.55298	-96.7377	-29.234	-56.6355		76.6	-706.798	-2278.02	-945.946		76.6	-4.07556	-813.045		76.6	-411.036	-1812.59		76.6	-138.579	-4156.65		76.6	-2404.77	-2816.2
76.7	-4.98601	-97.9832	-36.3957	-50.0965		76.7	-703.062	-2293.27	-950.616		76.7	-2.51866	-829.859		76.7	-406.988	-1813.53		76.7	-134.842	-4159.14		76.7	-2396.36	-2827.1
76.8	-2.49496	-103.899	-37.3299	-54.7672		76.8	-696.834	-2284.87	-978.329		76.8	-6.87799	-821.763		76.8	-411.036	-1788.31		76.8	-134.22	-4161.32		76.8	-2392.31	-2822.74
76.9	-7.16568	-105.456	-39.5095	-50.4078		76.9	-703.062	-2284.55	-958.401		76.9	-5.63246	-820.518		76.9	-418.509	-1789.55		76.9	-128.303	-4157.9		76.9	-2392	-2828.97
77	-3.74049	-96.7377	-36.7071	-50.4078		77	-695.9	-2274.28	-947.503		77	-7.18937	-819.895		77	-413.839	-1794.53		77	-125.501	-4134.23		77	-2386.08	-2829.28
77.1	-2.18358	-93.3125	-37.3299	-52.2761		77.1	-690.606	-2271.79	-943.143		77.1	-4.38694	-814.913		77.1	-412.593	-1801.38		77.1	-129.86	-4124.58		77.1	-2379.54	-2831.46
77.2	-2.49496	-97.9832	-31.725	-53.833		77.2	-705.241	-2278.33	-940.03		77.2	-6.56661	-801.835		77.2	-409.168	-1806.68		77.2	-132.974	-4131.74		77.2	-2369.58	-2843.61
77.3	-7.16568	-101.72	-30.7909	-47.9168		77.3	-708.044	-2281.44	-939.718		77.3	-8.12351	-792.182		77.3	-407.611	-1789.55		77.3	-141.381	-4151.36		77.3	-2363.98	-2839.87
77.4	-3.74049	-98.2946	-28.6112	-50.7192		77.4	-698.702	-2295.14	-941.586		77.4	-11.5487	-809.62		77.4	-415.707	-1809.48		77.4	-144.184	-4150.42		77.4	-2367.4	-2839.56
77.5	-3.74049	-100.786	-23.9405	-46.9827		77.5	-691.541	-2287.36	-940.652		77.5	-10.3032	-798.721		77.5	-415.084	-1809.17		77.5	-143.872	-4154.78		77.5	-2366.16	-2836.76
77.6	-6.85429	-100.163	-26.7429	-47.9168		77.6	-690.918	-2275.52	-933.491		77.6	-8.12351	-792.494		77.6	-406.677	-1806.06		77.6	-140.759	-4178.76		77.6	-2368.96	-2833.64
77.7	-2.80635	-94.8694	-25.186	-49.1623		77.7	-681.576	-2287.36	-928.82		77.7	-3.4528	-803.392		77.7	-410.102	-1800.14		77.7	-137.645	-4189.34		77.7	-2371.14	-2833.02
77.8	0.307461	-94.2467	-29.8567	-46.9827		77.8	-685.624	-2289.23	-931		77.8	-6.25523	-810.242		77.8	-405.12	-1789.24		77.8	-142.004	-4175.64		77.8	-2366.47	-2833.33
77.9	-4.05187	-86.7735	-30.1681	-47.9168		77.9	-680.642	-2274.9	-925.395		77.9	-5.32108	-810.242		77.9	-402.006	-1795.16		77.9	-148.854	-4164.12		77.9	-2364.6	-2832.4
78	-1.24944	-79.3004	-30.1681	-46.9827		78	-685.624	-2274.59	-931.311		78	-7.50075	-815.847		78	-405.12	-1789.55		78	-154.771	-4172.84		78	-2373.94	-2841.11
78.1	-1.24944	-78.989	-32.0364	-50.4078		78.1	-692.786	-2276.15	-934.425		78.1	-6.25523	-821.141		78.1	-413.527	-1783.01		78.1	-150.411	-4190.28		78.1	-2378.3	-2841.11
78.2	-1.8722	-85.528	-33.5933	-48.8509		78.2	-681.576	-2279.88	-939.407		78.2	-9.36903	-820.207		78.2	-415.707	-1791.73		78.2	-151.034	-4189.97		78.2	-2368.65	-2850.14
78.3	-5.92015	-84.9052	-33.5933	-44.1802		78.3	-676.906	-2284.24	-939.407		78.3	-5.94384	-827.057		78.3	-405.12	-1802.63		78.3	-146.363	-4189.03		78.3	-2357.75	-2844.23
78.4	-4.67463	-83.3483	-34.216	-46.9827		78.4	-677.528	-2274.28	-923.838		78.4	-9.05765	-821.141		78.4	-401.695	-1807.92		78.4	-142.627	-4162.88		78.4	-2366.78	-2847.97
78.5	-6.85429	-83.6597	-32.0364	-43.8688		78.5	-686.87	-2262.76	-904.221		78.5	-5.94384	-809.62		78.5	-402.629	-1821.62		78.5	-147.298	-4166.93		78.5	-2368.96	-2856.06
78.6	-5.29739	-92.3784	-32.0364	-43.2461		78.6	-685.313	-2267.43	-902.352		78.6	-7.50075	-821.141		78.6	-408.545	-1810.1		78.6	-144.495	-4166.3		78.6	-2369.89	-2836.44
78.7	-1.24944	-92.067	-31.4136	-41.3778		78.7	-684.067	-2267.43	-903.909		78.7	-4.07556	-817.716		78.7	-406.366	-1805.74		78.7	-138.268	-4158.52		78.7	-2375.19	-2835.82
78.8	-4.98601	-93.9353	-32.9705	-42.6233		78.8	-680.954	-2253.73	-900.173		78.8	-3.14142	-819.272		78.8	-405.12	-1820.07		78.8	-134.531	-4176.89		78.8	-2382.66	-2830.22
78.9	-4.36325	-98.606	-33.9047	-51.342		78.9	-679.397	-2259.96	-903.909		78.9	-7.18937	-810.242		78.9	-401.072	-1819.13		78.9	-133.908	-4169.42		78.9	-2377.99	-2834.26
79	-4.05187	-100.786	-36.3957	-45.4258		79	-679.708	-2265.56	-900.173		79	-7.18937	-806.194		79	-406.988	-1805.12		79	-141.381	-4180.31		79	-2384.22	-2837.38
79.1	-3.42911	-109.504	-32.9705	-44.803		79.1	-680.331	-2248.12	-904.532		79.1	-5.63246	-806.194		79.1	-403.563	-1808.55		79.1	-146.052	-4168.17		79.1	-2395.11	-2841.74
79.2	-4.98601	-115.732	-28.2998	-47.9168		79.2	-676.906	-2248.12	-903.287		79.2	-7.81213	-817.404		79.2	-402.006	-1806.99		79.2	-144.807	-4157.9		79.2	-2379.23	-2849.83
79.3	-5.92015	-112.618	-22.695	-50.0965		79.3	-676.906	-2262.45	-902.664		79.3	-7.18937	-824.566		79.3	-401.072	-1809.79		79.3	-148.854	-4157.9		79.3	-2367.4	-2854.19
79.4	-7.16568	-104.834	-27.9884	-46.3599		79.4	-670.989	-2259.33	-896.436		79.4	-6.25523	-820.207		79.4	-403.563	-1797.96		79.4	-146.675	-4148.87		79.4	-2372.38	-2864.16
79.5	-4.05187	-108.57	-31.725	-42.0006		79.5	-680.954	-2259.33	-890.831		79.5	-6.87799	-819.584		79.5	-404.809	-1794.53		79.5	-146.363	-4149.49		79.5	-2384.22	-2860.73
79.6	-9.65672	-105.768	-30.4795	-42.3119		79.6	-683.756	-2272.41	-894.879		79.6	-6.25523	-817.404		79.6	-405.12	-1791.11		79.6	-149.789	-4130.49		79.6	-2391.69	-2852.64
79.7	-9.9681	-105.145	-32.3478	-42.3119		79.7	-685.624	-2269.61	-885.538		79.7	-5.32108	-826.123		79.7	-410.102	-1786.75		79.7	-141.693	-4138.59		79.7	-2381.72	-2847.97
79.8	-5.29739	-99.8515	-29.5453	-41.0664		79.8	-679.397	-2271.17	-883.981		79.8	-7.81213	-823.32		79.8	-408.234	-1787.06		79.8	-138.89	-4163.19		79.8	-2373.94	-2850.46
79.9	-4.36325	-100.786	-27.3657	-41.6892		79.9	-674.415	-2273.66	-883.981		79.9	-9.36903	-806.506		79.9	-405.431	-1797.96		79.9	-135.777	-4164.43		79.9	-2372.07	-2861.35
80	-3.11773	-103.588	-28.9226	-46.3599		80	-680.331	-2266.49	-888.652		80	-3.14142	-799.033		80	-397.024	-1799.52		80	-124.878	-4155.09		80	-2387.95	-2843.61
80.1	-3.11773	-103.899	-29.5453	-50.0965		80.1	-672.858	-2263.69	-888.652		80.1	-5.63246	-791.56		80.1	-392.353	-1792.04		80.1	-132.663	-4143.88		80.1	-2392	-2835.51
80.2	-4.05187	-105.456	-28.9226	-51.9647		80.2	-667.253	-2270.23	-883.047		80.2	-1.8959	-786.266		80.2	-401.072	-1786.13		80.2	-135.154	-4154.16		80.2	-2377.36	-2838.62
80.3	-2.18358	-106.39	-30.1681	-50.4078		80.3	-670.678	-2271.79	-885.227		80.3	-3.14142	-774.745		80.3	-402.94	-1802.32		80.3	-145.429	-4178.76		80.3	-2368.33	-2841.74
80.4	-3.11773	-117.6	-29.8567	-47.6054		80.4	-675.971	-2273.66	-869.969		80.4	-6.87799	-790.003		80.4	-406.988	-1807.61		80.4	-151.657	-4174.71		80.4	-2364.29	-2843.61
80.5	-4.05187	-121.648	-37.9526	-47.294		80.5	-675.66	-2264.94	-878.688		80.5	-5.32108	-799.655		80.5	-404.809	-1805.12		80.5	-152.28	-4153.85		80.5	-2370.83	-2840.18
80.6	-6.85429	-120.091	-33.5933	-51.0306		80.6	-675.037	-2272.41	-889.897		80.6	-4.38694	-805.26		80.6	-404.809	-1814.15		80.6	-146.675	-4165.06		80.6	-2377.05	-2832.08
80.7	-4.98601	-124.762	-32.6591	-44.1802		80.7	-677.84	-2261.2	-892.077		80.7	-5.32108	-798.099		80.7	-405.743	-1815.4		80.7	-150.411	-4178.76		80.7	-2373.01	-2842.05
80.8	-3.42911	-122.582	-34.216	-41.6892		80.8	-676.283	-2252.17	-888.963		80.8	-6.87799	-787.2		80.8	-403.874	-1792.67		80.8	-146.052	-4175.64		80.8	-2374.25	-2839.25
80.9	-7.78844	-125.073	-31.4136	-39.8209		80.9	-668.81	-2254.97	-888.34		80.9	-6.25523	-779.104		80.9	-404.809	-1787.37		80.9	-145.741	-4176.27		80.9	-2368.02	-2841.74
81	-0.3153	-127.876	-32.9705	-41.6892		81	-674.415	-2256.84	-883.981		81	-6.87799	-791.56		81	-401.072	-1796.4		81	-151.657	-4158.52		81	-2372.69	-2838
81.1	-2.49496	-126.319	-32.0364	-46.3599		81.1	-678.151	-2248.12	-879.622		81.1	-6.56661	-788.757		81.1	-405.12	-1796.09		81.1	-151.346	-4158.52		81.1	-2360.55	-2837.69
81.2	-4.67463	-116.666	-29.5453	-47.6054		81.2	-678.151	-2229.44	-879.31		81.2	-3.76418	-771.631		81.2	-405.743	-1791.73		81.2	-144.807	-4164.12		81.2	-2356.81	-2830.22
81.3	-4.98601	-111.684	-27.6771	-44.4916		81.3	-678.151	-2239.4	-898.927		81.3	-5.0097	-761.978		81.3	-406.988	-1794.53		81.3	-150.1	-4168.48		81.3	-2348.1	-2823.05
81.4	-5.29739	-115.109	-31.4136	-44.4916		81.4	-681.888	-2250.93	-896.125		81.4	-2.51866	-766.649		81.4	-401.695	-1800.45		81.4	-149.166	-4165.06		81.4	-2344.98	-2808.73
81.5	-4.05187	-119.157	-32.6591	-40.755		81.5	-675.971	-2252.79	-892.7		81.5	-3.76418	-757.619		81.5	-397.335	-1792.67		81.5	-148.854	-4154.78		81.5	-2350.59	-2800.64
81.6	-3.74049	-116.666	-31.725	-41.6892		81.6	-671.924	-2242.52	-888.34		81.6	-5.0097	-763.847		81.6	-396.713	-1801.38		81.6	-140.447	-4151.04		81.6	-2348.72	-2801.88
81.7	-3.74049	-117.6	-31.1022	-40.4437		81.7	-662.582	-2245.01	-875.885		81.7	-2.51866	-773.5		81.7	-392.665	-1810.73		81.7	-142.627	-4165.99		81.7	-2345.29	-2799.7
81.8	-5.29739	-111.684	-29.5453	-43.5575		81.8	-657.6	-2242.83	-868.101		81.8	-1.27314	-766.649		81.8	-392.042	-1784.26		81.8	-140.136	-4151.67		81.8	-2336.89	-2806.55
81.9	-3.74049	-112.307	-35.773	-44.4916		81.9	-659.78	-2247.5	-861.562		81.9	-3.76418	-746.409		81.9	-390.796	-1784.26		81.9	-133.285	-4146.06		81.9	-2327.54	-2799.08
82	-6.23153	-110.438	-39.8209	-42.6233		82	-663.828	-2247.81	-861.25		82	-6.25523	-735.822		82	-393.599	-1788.62		82	-131.417	-4158.52		82	-2325.68	-2804.06
82.1	-4.36325	-117.6	-37.9526	-45.7371		82.1	-659.157	-2249.68	-873.394		82.1	-5.0097	-738.313		82.1	-388.617	-1788.93		82.1	-128.926	-4149.49		82.1	-2325.05	-2818.38
82.2	-4.05187	-114.798	-38.8868	-47.9168		82.2	-657.6	-2246.88	-875.574		82.2	-4.07556	-759.799		82.2	-393.599	-1804.19		82.2	-124.878	-4146.69		82.2	-2324.74	-2825.86
82.3	-8.72258	-110.438	-38.5754	-47.294		82.3	-668.498	-2229.75	-877.753		82.3	-6.25523	-758.553		82.3	-407.922	-1799.83		82.3	-123.633	-4136.1		82.3	-2328.79	-2830.22
82.4	-1.56082	-108.259	-32.6591	-48.5396		82.4	-658.846	-2236.6	-881.179		82.4	-6.56661	-769.763		82.4	-399.515	-1799.83		82.4	-124.255	-4135.79		82.4	-2338.13	-2832.4
82.5	-2.18358	-107.325	-32.3478	-50.4078		82.5	-656.043	-2239.72	-877.131		82.5	-7.81213	-767.583		82.5	-393.288	-1807.92		82.5	-119.896	-4147.31		82.5	-2329.72	-2833.02
82.6	-1.8722	-113.552	-29.8567	-53.833		82.6	-660.402	-2252.17	-864.987		82.6	-6.25523	-758.553		82.6	-395.779	-1799.52		82.6	-125.501	-4138.9		82.6	-2317.89	-2837.07
82.7	-3.11773	-103.588	-37.9526	-49.1623		82.7	-668.498	-2261.51	-875.574		82.7	-7.18937	-757.93		82.7	-398.27	-1798.27		82.7	-125.19	-4138.28		82.7	-2324.12	-2830.53
82.8	-4.05187	-96.1149	-37.3299	-51.6534		82.8	-674.103	-2249.06	-870.28		82.8	-6.25523	-763.535		82.8	-399.515	-1809.48		82.8	-124.567	-4140.46		82.8	-2327.86	-2830.22
82.9	1.2416	-104.211	-36.7071	-52.2761		82.9	-664.139	-2240.03	-862.807		82.9	-7.81213	-761.356		82.9	-398.892	-1820.69		82.9	-136.399	-4140.15		82.9	-2322.25	-2835.51
83	-7.78844	-107.013	-37.0185	-59.7493		83	-663.828	-2234.73	-861.562		83	-7.50075	-745.475		83	-392.042	-1813.84		83	-130.172	-4142.02		83	-2318.83	-2839.25
83.1	-5.29739	-108.882	-32.6591	-58.1924		83.1	-659.78	-2234.11	-865.61		83.1	-12.4828	-743.296		83.1	-392.976	-1806.37		83.1	-124.878	-4141.39		83.1	-2326.92	-2831.15
83.2	-5.29739	-109.193	-33.5933	-58.1924		83.2	-666.319	-2231	-874.951		83.2	-6.87799	-751.703		83.2	-399.204	-1806.37		83.2	-127.369	-4146.37		83.2	-2330.66	-2832.71
83.3	-3.74049	-112.307	-33.2819	-56.3241		83.3	-663.205	-2232.87	-874.951		83.3	-10.6146	-750.769		83.3	-399.827	-1818.2		83.3	-132.04	-4156.34		83.3	-2332.21	-2830.53
83.4	-4.98601	-112.618	-32.0364	-56.6355		83.4	-658.846	-2224.15	-871.214		83.4	-5.94384	-763.535		83.4	-403.252	-1812.59		83.4	-132.663	-4163.19		83.4	-2324.74	-2831.15
83.5	-2.18358	-106.39	-32.6591	-53.5216		83.5	-663.205	-2232.87	-877.131		83.5	-5.63246	-763.224		83.5	-407.611	-1802.01		83.5	-132.351	-4161.32		83.5	-2314.47	-2826.79
83.6	-2.80635	-103.899	-32.6591	-51.342		83.6	-657.911	-2230.06	-871.837		83.6	-11.5487	-767.272		83.6	-408.234	-1782.7		83.6	-133.908	-4151.67		83.6	-2310.11	-2833.64
83.7	-2.18358	-105.145	-32.9705	-49.7851		83.7	-658.846	-2221.03	-870.28		83.7	-6.25523	-757.93		83.7	-402.94	-1784.88		83.7	-137.645	-4164.12		83.7	-2302.95	-2833.02
83.8	-2.49496	-102.343	-37.0185	-46.9827		83.8	-654.175	-2219.79	-877.442		83.8	-8.43489	-748.9		83.8	-406.988	-1801.7		83.8	-142.627	-4135.48		83.8	-2303.26	-2827.1
83.9	-0.3153	-100.474	-38.8868	-47.6054		83.9	-645.145	-2219.17	-866.544		83.9	-11.2373	-758.553		83.9	-406.054	-1801.38		83.9	-136.399	-4136.41		83.9	-2313.84	-2829.28
84	-3.11773	-102.343	-32.6591	-52.5875		84	-645.456	-2219.48	-867.789		84	-7.50075	-765.715		84	-406.366	-1791.42		84	-140.759	-4158.83		84	-2308.24	-2820.56
84.1	-7.47705	-105.768	-35.773	-54.7672		84.1	-651.372	-2221.97	-873.083		84.1	-11.5487	-770.074		84.1	-407.3	-1790.18		84.1	-147.609	-4142.33		84.1	-2297.34	-2818.38
84.2	-3.74049	-103.899	-31.725	-54.7672		84.2	-640.474	-2219.48	-869.346		84.2	-11.2373	-772.565		84.2	-408.857	-1799.52		84.2	-138.268	-4130.18		84.2	-2304.19	-2821.5
84.3	-0.938061	-107.325	-28.6112	-52.2761		84.3	-639.851	-2207.33	-871.837		84.3	-6.25523	-788.134		84.3	-403.874	-1808.55		84.3	-138.268	-4118.97		84.3	-2307.3	-2820.56
84.4	-3.74049	-108.57	-28.9226	-47.294		84.4	-645.456	-2204.22	-879.622		84.4	-5.32108	-784.086		84.4	-403.874	-1821.31		84.4	-135.154	-4147.31		84.4	-2302.95	-2830.22
84.5	-2.18358	-101.408	-33.2819	-42.3119		84.5	-649.816	-2201.73	-888.963		84.5	-7.50075	-781.284		84.5	-408.857	-1804.81		84.5	-137.645	-4143.26		84.5	-2295.16	-2835.82
84.6	-2.80635	-102.031	-36.7071	-42.6233		84.6	-652.929	-2205.15	-874.951		84.6	-8.74627	-771.32		84.6	-403.874	-1805.74		84.6	-136.399	-4132.98		84.6	-2300.45	-2838.94
84.7	-3.42911	-97.9832	-32.0364	-41.0664		84.7	-647.325	-2202.35	-870.28		84.7	-5.0097	-762.601		84.7	-399.515	-1803.56		84.7	-136.399	-4123.33		84.7	-2306.99	-2835.82
84.8	-0.938061	-88.9532	-33.5933	-38.8868		84.8	-646.39	-2208.27	-860.939		84.8	-8.74627	-757.308		84.8	-403.563	-1789.24		84.8	-135.465	-4146.37		84.8	-2299.52	-2828.35
84.9	-3.42911	-87.7077	-34.5274	-42.6233		84.9	-645.145	-2214.18	-863.43		84.9	-8.12351	-765.092		84.9	-398.892	-1792.67		84.9	-129.549	-4132.36		84.9	-2301.7	-2810.91
85	-2.18358	-84.9052	-31.725	-43.8688		85	-637.672	-2202.97	-872.771		85	-9.36903	-760.422		85	-395.467	-1791.42		85	-132.04	-4112.75		85	-2301.08	-2805.62
85.1	-0.938061	-87.0849	-29.8567	-47.294		85.1	-628.33	-2198.61	-873.394		85.1	-10.3032	-760.11		85.1	-394.844	-1773.67		85.1	-132.351	-4118.35		85.1	-2294.54	-2809.67
85.2	-3.42911	-84.2825	-28.2998	-48.2282		85.2	-635.803	-2192.7	-860.628		85.2	-5.94384	-762.601		85.2	-403.563	-1778.65		85.2	-140.759	-4136.41		85.2	-2289.87	-2817.14
85.3	-3.74049	-88.9532	-34.5274	-48.8509		85.3	-639.851	-2191.76	-854.089		85.3	-6.25523	-763.847		85.3	-405.743	-1806.68		85.3	-139.824	-4128.94		85.3	-2286.75	-2815.58
85.4	-3.42911	-90.5101	-36.0843	-46.6713		85.4	-636.115	-2194.25	-853.466		85.4	-3.76418	-766.026		85.4	-404.809	-1793.91		85.4	-131.417	-4134.54		85.4	-2292.36	-2802.81
85.5	-1.56082	-90.8215	-32.0364	-45.4258		85.5	-635.492	-2185.22	-868.412		85.5	-7.18937	-767.583		85.5	-405.12	-1793.29		85.5	-131.729	-4146.69		85.5	-2293.6	-2800.32
85.6	-4.67463	-86.1508	-36.3957	-45.7371		85.6	-626.773	-2182.11	-883.047		85.6	-6.87799	-765.404		85.6	-410.413	-1792.04		85.6	-134.842	-4147.31		85.6	-2292.05	-2792.54
85.7	-3.74049	-87.0849	-34.216	-43.2461		85.7	-626.773	-2181.18	-862.496		85.7	-1.8959	-769.14		85.7	-406.988	-1801.07		85.7	-131.417	-4149.18		85.7	-2287.69	-2791.61
85.8	-6.23153	-89.5759	-32.0364	-46.9827		85.8	-631.755	-2178.37	-855.023		85.8	-7.18937	-775.056		85.8	-402.318	-1807.61		85.8	-136.711	-4154.47		85.8	-2299.21	-2790.05
85.9	-0.3153	-84.9052	-29.5453	-45.1144		85.9	-629.576	-2176.51	-867.166		85.9	-6.56661	-782.53		85.9	-402.94	-1806.37		85.9	-142.627	-4171.6		85.9	-2299.21	-2781.64
86	-4.05187	-89.2646	-31.1022	-47.6054		86	-635.181	-2184.29	-860.939		86	-5.32108	-780.661		86	-404.497	-1809.79		86	-140.136	-4188.72		86	-2292.36	-2782.89
86.1	-2.80635	-89.8873	-33.5933	-48.2282		86.1	-636.426	-2186.16	-852.22		86.1	-9.36903	-772.565		86.1	-405.12	-1803.25		86.1	-132.351	-4187.48		86.1	-2290.8	-2799.39
86.2	-4.05187	-89.2646	-31.725	-48.2282		86.2	-638.294	-2190.83	-847.549		86.2	-5.63246	-766.338		86.2	-406.677	-1816.64		86.2	-135.154	-4189.66		86.2	-2303.57	-2806.24
86.3	-1.8722	-93.9353	-30.7909	-44.4916		86.3	-630.51	-2185.85	-846.615		86.3	-9.36903	-770.697		86.3	-409.168	-1809.79		86.3	-135.465	-4178.76		86.3	-2294.23	-2808.42
86.4	-1.8722	-89.2646	-29.234	-42.9347		86.4	-634.869	-2196.75	-850.663		86.4	-8.74627	-767.272		86.4	-402.006	-1794.53		86.4	-129.549	-4183.74		86.4	-2297.34	-2809.04
86.5	0.618841	-93.0011	-26.7429	-42.3119		86.5	-635.492	-2197.99	-854.089		86.5	-11.5487	-759.799		86.5	-398.27	-1790.18		86.5	-124.878	-4173.15		86.5	-2303.26	-2813.09
86.6	-1.24944	-87.3963	-22.3836	-42.6233		86.6	-639.229	-2194.57	-853.777		86.6	-12.1715	-754.817		86.6	-397.647	-1788		86.6	-125.19	-4183.12		86.6	-2292.05	-2819.94
86.7	-2.18358	-90.8215	-30.4795	-46.3599		86.7	-638.294	-2199.55	-858.759		86.7	-5.94384	-747.344		86.7	-397.335	-1782.7		86.7	-134.531	-4173.78		86.7	-2298.27	-2807.49
86.8	-0.938061	-95.8036	-28.9226	-41.3778		86.8	-639.54	-2202.04	-853.777		86.8	-4.07556	-741.116		86.8	-402.318	-1767.44		86.8	-134.842	-4152.6		86.8	-2296.41	-2798.46
86.9	2.79851	-92.6898	-30.7909	-39.1981		86.9	-637.672	-2197.06	-856.58		86.9	-6.87799	-737.379		86.9	-402.629	-1786.75		86.9	-134.531	-4157.27		86.9	-2283.95	-2805.93
87	0.618841	-95.1808	-35.1502	-39.1981		87	-632.69	-2194.25	-839.765		87	-9.99179	-750.457		87	-401.072	-1783.32		87	-136.088	-4151.67		87	-2280.53	-2820.88
87.1	0.307461	-95.4922	-33.9047	-34.5274		87.1	-626.151	-2189.58	-841.322		87.1	-8.74627	-757.619		87.1	-405.12	-1774.29		87.1	-140.447	-4151.04		87.1	-2274.92	-2811.53
87.2	-0.3153	-94.2467	-29.234	-43.8688		87.2	-627.396	-2179.31	-849.418		87.2	-8.43489	-769.14		87.2	-405.12	-1758.41		87.2	-142.938	-4155.4		87.2	-2273.68	-2822.12
87.3	0.930222	-94.8694	-32.6591	-43.8688		87.3	-622.725	-2183.36	-852.843		87.3	-7.18937	-770.074		87.3	-395.779	-1771.49		87.3	-146.052	-4139.21		87.3	-2293.29	-2812.16
87.4	2.17575	-90.8215	-26.7429	-39.8209		87.4	-624.282	-2193.32	-846.615		87.4	-5.63246	-766.961		87.4	-401.072	-1771.49		87.4	-139.202	-4116.17		87.4	-2294.23	-2799.39
87.5	2.79851	-90.8215	-25.4974	-39.8209		87.5	-627.396	-2187.4	-827.932		87.5	-5.32108	-757.308		87.5	-397.024	-1770.25		87.5	-137.022	-4146.69		87.5	-2283.02	-2793.47
87.6	-2.49496	-93.9353	-32.6591	-43.5575		87.6	-636.115	-2185.54	-830.112		87.6	-7.50075	-760.422		87.6	-397.958	-1782.08		87.6	-145.118	-4154.78		87.6	-2270.25	-2795.96
87.7	-0.938061	-98.2946	-33.2819	-46.3599		87.7	-637.672	-2192.7	-833.537		87.7	-10.3032	-764.158		87.7	-402.94	-1789.55		87.7	-152.591	-4150.73		87.7	-2268.38	-2786.31
87.8	3.42127	-94.2467	-29.8567	-46.6713		87.8	-637.983	-2194.25	-825.441		87.8	-5.32108	-778.793		87.8	-403.252	-1779.9		87.8	-153.214	-4145.44		87.8	-2274.61	-2782.58
87.9	7.7806	-88.6418	-27.3657	-46.6713		87.9	-629.887	-2186.16	-827.621		87.9	-12.4828	-771.32		87.9	-404.809	-1769.62		87.9	-150.411	-4151.67		87.9	-2287.69	-2786.62
88	-1.8722	-87.0849	-31.1022	-45.1144		88	-626.773	-2184.29	-831.358		88	-9.05765	-781.284		88	-402.006	-1773.67		88	-143.25	-4146.69		88	-2292.36	-2789.43
88.1	-5.29739	-85.528	-28.9226	-43.8688		88.1	-623.348	-2178.69	-836.651		88.1	-8.12351	-787.512		88.1	-397.024	-1776.79		88.1	-141.07	-4138.59		88.1	-2288.31	-2804.06
88.2	-1.8722	-92.6898	-29.8567	-47.294		88.2	-617.121	-2176.19	-835.717		88.2	-11.2373	-767.272		88.2	-400.138	-1762.15		88.2	-141.381	-4146.06		88.2	-2289.56	-2804.06
88.3	3.42127	-96.4263	-33.9047	-48.2282		88.3	-619.612	-2186.78	-848.484		88.3	-10.6146	-759.176		88.3	-398.581	-1768.69		88.3	-147.609	-4160.39		88.3	-2287.69	-2814.34
88.4	-1.56082	-95.8036	-35.1502	-48.8509		88.4	-612.761	-2166.54	-846.927		88.4	-10.9259	-776.925		88.4	-395.156	-1788.93		88.4	-152.591	-4165.37		88.4	-2293.6	-2820.88
88.5	2.79851	-96.4263	-32.0364	-51.6534		88.5	-609.959	-2159.38	-833.849		88.5	-10.6146	-796.853		88.5	-397.958	-1790.8		88.5	-146.986	-4148.87		88.5	-2297.65	-2812.16
88.6	0.307461	-96.1149	-32.0364	-49.7851		88.6	-613.384	-2161.87	-818.28		88.6	-11.2373	-793.739		88.6	-398.892	-1781.46		88.6	-142.938	-4142.64		88.6	-2292.67	-2799.08
88.7	0.307461	-96.7377	-31.725	-45.1144		88.7	-622.103	-2166.54	-818.591		88.7	-12.7942	-788.134		88.7	-396.401	-1781.15		88.7	-144.184	-4133.92		88.7	-2296.09	-2809.35
88.8	-1.24944	-102.031	-34.8388	-44.803		88.8	-626.151	-2172.77	-829.178		88.8	-9.36903	-785.332		88.8	-397.335	-1785.82		88.8	-146.363	-4136.1		88.8	-2288.62	-2819.32
88.9	-2.49496	-105.768	-34.216	-47.9168		88.9	-619.3	-2180.87	-833.226		88.9	-10.3032	-785.021		88.9	-402.006	-1774.29		88.9	-138.268	-4134.23		88.9	-2293.6	-2815.89
89	-2.18358	-103.588	-33.2819	-44.1802		89	-621.48	-2182.42	-837.897		89	-7.81213	-798.721		89	-397.335	-1765.58		89	-141.381	-4140.15		89	-2293.92	-2811.53
89.1	-1.56082	-98.606	-32.0364	-42.6233		89.1	-622.414	-2172.77	-832.292		89.1	-11.5487	-794.673		89.1	-388.305	-1761.84		89.1	-147.92	-4138.59		89.1	-2284.89	-2816.83
89.2	-1.8722	-100.474	-38.264	-40.1323		89.2	-622.725	-2172.46	-832.603		89.2	-7.81213	-787.2		89.2	-386.437	-1759.66		89.2	-146.052	-4136.72		89.2	-2279.28	-2829.59
89.3	-1.24944	-97.3605	-31.1022	-37.0185		89.3	-623.66	-2170.9	-828.867		89.3	-6.56661	-785.332		89.3	-391.731	-1758.73		89.3	-151.968	-4128.31		89.3	-2279.59	-2834.26
89.4	-4.36325	-96.7377	-28.2998	-42.0006		89.4	-614.318	-2176.19	-822.328		89.4	-7.81213	-784.709		89.4	-394.533	-1747.52		89.4	-154.771	-4140.77		89.4	-2282.08	-2825.55
89.5	-1.8722	-98.9174	-28.2998	-44.803		89.5	-620.234	-2173.08	-823.262		89.5	-8.12351	-784.086		89.5	-388.305	-1755.3		89.5	-159.753	-4128		89.5	-2282.39	-2814.34
89.6	2.48713	-94.558	-25.4974	-44.1802		89.6	-624.905	-2157.82	-825.13		89.6	-10.6146	-774.434		89.6	-385.503	-1756.55		89.6	-159.441	-4123.64		89.6	-2282.39	-2812.16
89.7	-2.18358	-98.606	-29.5453	-41.0664		89.7	-610.893	-2150.04	-811.118		89.7	-10.3032	-780.661		89.7	-378.341	-1762.46		89.7	-164.424	-4124.27		89.7	-2278.35	-2810.6
89.8	0.307461	-105.456	-32.0364	-42.3119		89.8	-607.156	-2155.33	-822.639		89.8	-11.8601	-788.757		89.8	-382.078	-1757.17		89.8	-165.358	-4130.81		89.8	-2283.64	-2816.52
89.9	-0.62668	-101.408	-29.8567	-43.5575		89.9	-610.582	-2167.79	-825.753		89.9	-12.1715	-797.164		89.9	-385.192	-1773.67		89.9	-160.687	-4148.55		89.9	-2284.57	-2825.23
90	-3.74049	-109.193	-24.5632	-41.3778		90	-611.516	-2164.98	-816.1		90	-11.2373	-785.332		90	-385.814	-1764.95		90	-156.328	-4144.19		90	-2284.57	-2820.25
90.1	-0.62668	-100.786	-24.2519	-43.2461		90.1	-606.845	-2156.58	-822.639		90.1	-7.81213	-787.512		90.1	-385.192	-1759.35		90.1	-152.28	-4137.97		90.1	-2282.08	-2813.71
90.2	-0.3153	-106.702	-28.9226	-44.1802		90.2	-611.516	-2158.45	-824.819		90.2	-9.68041	-809.62		90.2	-387.371	-1758.1		90.2	-156.95	-4132.67		90.2	-2287.06	-2820.25
90.3	3.10989	-106.39	-23.6291	-46.0485		90.3	-616.809	-2152.22	-813.92		90.3	-6.25523	-798.721		90.3	-388.617	-1761.84		90.3	-157.885	-4141.39		90.3	-2270.87	-2814.65
90.4	2.48713	-105.456	-30.4795	-46.9827		90.4	-617.743	-2143.81	-812.363		90.4	-11.8601	-778.17		90.4	-387.06	-1761.22		90.4	-153.214	-4148.87		90.4	-2262.15	-2798.14
90.5	-1.8722	-103.588	-25.4974	-41.0664		90.5	-621.48	-2149.1	-808.938		90.5	-9.05765	-783.775		90.5	-387.371	-1762.15		90.5	-151.968	-4166.61		90.5	-2262.15	-2798.14
90.6	1.55298	-102.031	-26.7429	-43.5575		90.6	-617.743	-2153.77	-819.837		90.6	-10.3032	-781.284		90.6	-387.683	-1764.95		90.6	-154.459	-4173.78		90.6	-2265.27	-2795.03
90.7	-0.0039196	-97.0491	-30.1681	-36.0843		90.7	-614.318	-2158.76	-812.986		90.7	-9.05765	-782.53		90.7	-388.305	-1760.28		90.7	-154.459	-4180		90.7	-2265.27	-2809.04
90.8	-0.0039196	-95.1808	-27.3657	-33.2819		90.8	-616.498	-2166.23	-811.118		90.8	-7.18937	-784.709		90.8	-385.192	-1756.55		90.8	-158.196	-4140.15		90.8	-2276.17	-2823.68
90.9	2.48713	-100.786	-31.4136	-33.2819		90.9	-614.318	-2156.89	-808.004		90.9	-9.99179	-792.494		90.9	-386.749	-1758.1		90.9	-158.819	-4128.94		90.9	-2264.65	-2830.53
91	2.48713	-102.965	-32.0364	-35.1502		91	-618.055	-2148.17	-818.902		91	-7.18937	-786.578		91	-380.521	-1754.68		91	-159.441	-4152.29		91	-2256.86	-2815.89
91.1	2.17575	-105.768	-31.725	-36.0843		91.1	-617.743	-2147.24	-817.346		91.1	-6.56661	-767.583		91.1	-371.802	-1763.09		91.1	-159.753	-4128.63		91.1	-2259.66	-2805.62
91.2	1.86436	-103.588	-27.3657	-33.9047		91.2	-619.3	-2155.33	-811.429		91.2	-5.94384	-780.35		91.2	-369	-1771.18		91.2	-160.998	-4128.94		91.2	-2258.73	-2813.09
91.3	1.86436	-106.39	-29.5453	-32.3478		91.3	-622.725	-2155.95	-811.741		91.3	-6.56661	-801.212		91.3	-367.443	-1757.48		91.3	-159.753	-4141.7		91.3	-2268.38	-2816.83
91.4	1.55298	-101.408	-30.4795	-34.216		91.4	-622.414	-2156.89	-809.872		91.4	-8.74627	-803.703		91.4	-369.623	-1746.27		91.4	-155.705	-4133.3		91.4	-2265.27	-2820.88
91.5	1.55298	-102.343	-32.3478	-34.5274		91.5	-617.121	-2162.49	-805.202		91.5	-2.83004	-800.278		91.5	-374.916	-1746.58		91.5	-161.621	-4130.49		91.5	-2266.51	-2818.38
91.6	4.35541	-97.3605	-29.234	-36.3957		91.6	-618.055	-2164.05	-792.435		91.6	-5.0097	-804.326		91.6	-380.521	-1751.88		91.6	-165.046	-4114.92		91.6	-2264.96	-2819.94
91.7	1.86436	-96.7377	-27.0543	-35.4616		91.7	-616.186	-2164.98	-785.273		91.7	-4.38694	-803.703		91.7	-374.916	-1748.45		91.7	-167.226	-4118.97		91.7	-2261.84	-2814.96
91.8	-0.62668	-99.2287	-29.8567	-39.8209		91.8	-619.612	-2164.67	-794.926		91.8	-1.58452	-801.835		91.8	-372.114	-1744.4		91.8	-171.585	-4126.76		91.8	-2268.69	-2812.47
91.9	3.42127	-101.72	-23.9405	-39.5095		91.9	-613.384	-2174.64	-797.106		91.9	-3.14142	-801.212		91.9	-374.293	-1746.58		91.9	-172.208	-4122.4		91.9	-2276.48	-2814.34
92	1.86436	-103.899	-27.0543	-39.1981		92	-615.875	-2174.64	-785.896		92	-5.32108	-802.147		92	-364.018	-1753.43		92	-170.963	-4110.25		92	-2269.94	-2806.24
92.1	-3.42911	-95.8036	-29.8567	-38.5754		92.1	-619.612	-2164.98	-779.357		92.1	-5.63246	-813.356		92.1	-368.066	-1762.46		92.1	-174.699	-4097.49		92.1	-2263.09	-2801.57
92.2	0.307461	-93.0011	-27.3657	-36.3957		92.2	-619.923	-2165.92	-782.782		92.2	-6.87799	-810.242		92.2	-369.311	-1745.34		92.2	-168.783	-4098.73		92.2	-2255.3	-2808.73
92.3	-0.0039196	-95.1808	-28.9226	-37.3299		92.3	-616.498	-2163.74	-776.866		92.3	-3.4528	-812.733		92.3	-370.245	-1744.09		92.3	-163.801	-4094.06		92.3	-2265.27	-2802.5
92.4	1.2416	-92.067	-29.5453	-39.8209		92.4	-615.875	-2163.74	-777.177		92.4	-6.87799	-813.045		92.4	-375.227	-1760.28		92.4	-161.932	-4095.62		92.4	-2266.51	-2809.67
92.5	2.48713	-91.4442	-28.6112	-42.3119		92.5	-608.713	-2164.67	-785.585		92.5	-5.32108	-798.721		92.5	-382.389	-1760.28		92.5	-157.573	-4103.4		92.5	-2264.02	-2796.28
92.6	2.48713	-86.1508	-31.1022	-38.8868		92.6	-615.875	-2162.49	-795.238		92.6	-5.63246	-808.063		92.6	-379.587	-1761.22		92.6	-160.064	-4099.67		92.6	-2256.55	-2797.83
92.7	3.42127	-93.3125	-27.9884	-40.1323		92.7	-616.186	-2157.51	-792.435		92.7	-7.50075	-820.207		92.7	-376.162	-1753.12		92.7	-163.178	-4099.67		92.7	-2255.62	-2790.67
92.8	5.60093	-101.097	-33.5933	-41.3778		92.8	-619.923	-2159.07	-777.8		92.8	-8.43489	-814.29		92.8	-374.605	-1758.1		92.8	-147.609	-4114.92		92.8	-2258.73	-2799.39
92.9	1.86436	-102.654	-32.3478	-42.9347		92.9	-616.498	-2155.02	-770.638		92.9	-6.56661	-813.045		92.9	-378.03	-1777.72		92.9	-148.854	-4105.9		92.9	-2258.73	-2806.55
93	3.73265	-99.8515	-29.8567	-37.9526		93	-610.27	-2160	-769.704		93	-6.25523	-801.524		93	-377.407	-1768.07		93	-145.429	-4101.54		93	-2257.79	-2816.52
93.1	5.28955	-101.097	-26.4315	-44.4916		93.1	-607.156	-2162.18	-776.243		93.1	-5.0097	-800.278		93.1	-379.898	-1771.49		93.1	-151.034	-4102.16		93.1	-2259.97	-2807.8
93.2	-0.3153	-98.9174	-27.9884	-41.6892		93.2	-610.893	-2165.3	-766.591		93.2	-5.94384	-802.769		93.2	-380.521	-1765.58		93.2	-154.771	-4103.4		93.2	-2257.48	-2800.95
93.3	5.60093	-100.163	-30.4795	-42.6233		93.3	-609.959	-2146.61	-768.459		93.3	-8.43489	-811.488		93.3	-378.341	-1754.37		93.3	-155.393	-4105.9		93.3	-2246.9	-2792.54
93.4	1.2416	-97.6718	-31.1022	-43.5575		93.4	-606.222	-2153.46	-766.902		93.4	-8.74627	-826.746		93.4	-378.03	-1756.23		93.4	-146.363	-4103.72		93.4	-2250.63	-2800.64
93.5	3.10989	-95.1808	-32.6591	-42.3119		93.5	-608.091	-2158.13	-766.902		93.5	-7.50075	-835.153		93.5	-384.569	-1753.43		93.5	-146.052	-4108.7		93.5	-2260.6	-2798.46
93.6	3.10989	-97.3605	-32.6591	-44.803		93.6	-615.252	-2155.64	-779.669		93.6	-8.74627	-825.189		93.6	-378.341	-1754.37		93.6	-145.118	-4117.73		93.6	-2255.93	-2802.5
93.7	2.79851	-98.2946	-27.6771	-47.6054		93.7	-616.186	-2150.04	-773.441		93.7	-7.18937	-813.356		93.7	-377.719	-1753.74		93.7	-152.28	-4118.66		93.7	-2257.79	-2802.81
93.8	4.04403	-95.1808	-36.0843	-48.2282		93.8	-606.222	-2146.92	-759.117		93.8	-6.87799	-804.015		93.8	-377.096	-1745.65		93.8	-141.07	-4103.09		93.8	-2248.45	-2795.34
93.9	9.02612	-95.1808	-35.1502	-46.0485		93.9	-601.552	-2138.83	-769.082		93.9	-5.94384	-803.081		93.9	-380.521	-1755.92		93.9	-143.25	-4094.69		93.9	-2232.26	-2804.06
94	4.66679	-93.0011	-37.0185	-44.803		94	-600.929	-2133.54	-765.968		94	-5.32108	-790.003		94	-383.323	-1764.64		94	-153.214	-4075.07		94	-2221.05	-2805.31
94.1	4.04403	-94.8694	-37.9526	-47.9168		94.1	-596.881	-2141.63	-762.543		94.1	-5.32108	-789.069		94.1	-386.126	-1745.96		94.1	-150.1	-4090.01		94.1	-2221.99	-2796.28
94.2	1.86436	-90.8215	-33.5933	-47.9168		94.2	-595.013	-2128.86	-766.591		94.2	-11.2373	-796.23		94.2	-386.749	-1750.01		94.2	-151.657	-4099.98		94.2	-2229.46	-2793.16
94.3	-0.0039196	-81.48	-35.1502	-42.3119		94.3	-591.899	-2117.97	-762.543		94.3	-9.36903	-799.655		94.3	-383.012	-1763.71		94.3	-152.902	-4099.36		94.3	-2234.44	-2796.9
94.4	3.42127	-77.1207	-32.0364	-42.6233		94.4	-599.372	-2135.09	-761.608		94.4	-5.63246	-801.524		94.4	-375.227	-1753.12		94.4	-154.459	-4116.79		94.4	-2230.39	-2814.34
94.5	1.55298	-73.6955	-34.216	-42.9347		94.5	-596.258	-2149.73	-755.381		94.5	-4.38694	-808.063		94.5	-374.916	-1741.29		94.5	-152.591	-4126.76		94.5	-2233.2	-2807.49
94.6	-0.3153	-76.1866	-36.3957	-42.3119		94.6	-596.881	-2137.27	-750.087		94.6	-7.18937	-813.045		94.6	-379.275	-1745.03		94.6	-147.92	-4125.2		94.6	-2229.77	-2800.32
94.7	-1.24944	-74.9411	-36.3957	-43.5575		94.7	-590.342	-2137.27	-749.153		94.7	-8.43489	-809.62		94.7	-375.539	-1754.37		94.7	-150.723	-4120.22		94.7	-2234.75	-2795.34
94.8	0.618841	-72.7614	-35.773	-38.5754		94.8	-591.276	-2135.4	-752.89		94.8	-9.36903	-804.015		94.8	-374.605	-1759.04		94.8	-153.837	-4120.53		94.8	-2242.23	-2801.26
94.9	1.55298	-75.5638	-37.3299	-46.0485		94.9	-586.605	-2133.22	-752.578		94.9	-9.36903	-808.374		94.9	-376.784	-1771.18		94.9	-154.459	-4122.4		94.9	-2247.52	-2800.64
95	4.04403	-73.3841	-33.2819	-39.5095		95	-588.474	-2138.52	-751.644		95	-5.32108	-799.967		95	-377.407	-1771.49		95	-146.675	-4113.06		95	-2238.49	-2798.77
95.1	1.86436	-74.0069	-32.3478	-37.0185		95.1	-589.096	-2132.6	-745.728		95.1	-7.81213	-815.224		95.1	-380.521	-1763.4		95.1	-142.938	-4110.88		95.1	-2243.78	-2801.88
95.2	1.55298	-73.6955	-34.5274	-38.8868		95.2	-592.833	-2125.13	-747.285		95.2	-10.6146	-806.194		95.2	-379.587	-1786.75		95.2	-143.561	-4098.11		95.2	-2237.56	-2813.09
95.3	3.42127	-72.45	-30.4795	-38.264		95.3	-596.881	-2129.8	-741.057		95.3	-8.74627	-813.045		95.3	-380.832	-1779.28		95.3	-150.411	-4109.94		95.3	-2233.51	-2819.63
95.4	3.73265	-74.0069	-28.9226	-42.9347		95.4	-594.39	-2135.4	-737.632		95.4	-5.94384	-805.26		95.4	-377.096	-1756.23		95.4	-146.052	-4103.4		95.4	-2247.21	-2813.09
95.5	2.17575	-77.1207	-35.4616	-45.1144		95.5	-585.671	-2129.18	-739.5		95.5	-10.6146	-796.23		95.5	-375.227	-1757.48		95.5	-140.136	-4075.07		95.5	-2242.23	-2815.58
95.6	-1.8722	-82.7256	-33.9047	-46.9827		95.6	-579.755	-2129.8	-756.938		95.6	-11.5487	-800.901		95.6	-371.18	-1751.88		95.6	-146.986	-4070.71		95.6	-2236.93	-2809.35
95.7	-3.42911	-82.7256	-22.3836	-50.7192		95.7	-590.342	-2114.23	-767.213		95.7	-8.43489	-800.59		95.7	-371.18	-1748.76		95.7	-149.477	-4074.13		95.7	-2229.77	-2822.12
95.8	-0.0039196	-77.7435	-30.4795	-47.6054		95.8	-588.474	-2117.65	-756.315		95.8	-9.05765	-796.23		95.8	-365.263	-1771.49		95.8	-145.741	-4081.3		95.8	-2219.5	-2833.02
95.9	-2.18358	-78.0549	-28.9226	-48.5396		95.9	-587.851	-2129.18	-760.363		95.9	-9.99179	-787.2		95.9	-360.904	-1771.8		95.9	-149.789	-4081.92		95.9	-2223.54	-2819.32
96	-5.29739	-76.498	-29.234	-47.6054		96	-590.03	-2135.4	-748.842		96	-6.87799	-793.117		96	-360.904	-1783.64		96	-145.429	-4088.46		96	-2225.72	-2799.7
96.1	-1.24944	-80.5459	-29.5453	-44.1802		96.1	-582.246	-2132.91	-754.758		96.1	-6.87799	-796.542		96.1	-362.461	-1771.49		96.1	-144.184	-4082.23		96.1	-2230.7	-2801.57
96.2	-0.0039196	-80.8573	-32.9705	-43.8688		96.2	-581.623	-2127.62	-786.519		96.2	-1.8959	-799.967		96.2	-359.036	-1769		96.2	-137.956	-4080.36		96.2	-2218.25	-2800.01
96.3	-0.62668	-81.1687	-31.725	-45.1144		96.3	-582.557	-2124.19	-738.878		96.3	-5.32108	-794.362		96.3	-363.084	-1777.1		96.3	-137.645	-4066.97		96.3	-2208.91	-2805.93
96.4	-4.36325	-87.7077	-33.2819	-40.755		96.4	-577.887	-2127.31	-756.626		96.4	-5.32108	-802.769		96.4	-357.79	-1771.49		96.4	-139.824	-4080.36		96.4	-2221.99	-2808.73
96.5	2.48713	-87.7077	-30.4795	-39.1981		96.5	-582.557	-2125.44	-768.459		96.5	-2.83004	-794.051		96.5	-353.431	-1782.39		96.5	-142.938	-4083.48		96.5	-2228.21	-2806.24
96.6	3.10989	-88.9532	-30.1681	-43.2461		96.6	-587.851	-2128.86	-770.638		96.6	-5.0097	-781.284		96.6	-354.365	-1791.11		96.6	-146.675	-4079.74		96.6	-2225.72	-2800.01
96.7	1.55298	-88.3304	-27.3657	-45.1144		96.7	-588.474	-2128.24	-773.752		96.7	-3.4528	-787.512		96.7	-359.347	-1778.97		96.7	-148.543	-4086.59		96.7	-2214.82	-2804.99
96.8	3.42127	-89.8873	-30.1681	-45.1144		96.8	-580.066	-2117.03	-764.411		96.8	-7.50075	-788.134		96.8	-361.838	-1781.77		96.8	-151.968	-4073.2		96.8	-2206.11	-2809.98
96.9	2.48713	-88.019	-32.6591	-44.1802		96.9	-579.444	-2118.59	-753.513		96.9	-3.76418	-785.955		96.9	-359.347	-1770.87		96.9	-142.938	-4079.74		96.9	-2204.55	-2789.74
97	-2.49496	-86.1508	-27.6771	-37.9526		97	-576.018	-2123.26	-737.321		97	-3.76418	-780.039		97	-360.281	-1779.28		97	-139.513	-4080.67		97	-2210.78	-2783.51
97.1	0.307461	-91.1328	-31.4136	-38.8868		97.1	-576.018	-2116.41	-739.812		97.1	-4.38694	-797.476		97.1	-359.97	-1781.46		97.1	-145.741	-4089.7		97.1	-2217.32	-2776.35
97.2	-2.80635	-95.1808	-25.186	-41.0664		97.2	-576.018	-2112.98	-742.926		97.2	-7.81213	-804.326		97.2	-362.149	-1779.9		97.2	-147.92	-4086.28		97.2	-2220.12	-2786.62
97.3	2.48713	-98.9174	-23.6291	-41.0664		97.3	-574.461	-2115.48	-739.189		97.3	-4.38694	-801.212		97.3	-363.084	-1769.62		97.3	-151.657	-4085.03		97.3	-2222.3	-2779.77
97.4	1.2416	-99.2287	-26.7429	-41.6892		97.4	-572.593	-2110.18	-753.824		97.4	-5.94384	-793.739		97.4	-364.018	-1758.73		97.4	-152.902	-4083.16		97.4	-2217	-2778.53
97.5	-2.49496	-92.3784	-28.9226	-47.9168		97.5	-572.905	-2116.41	-760.674		97.5	-6.87799	-797.476		97.5	-360.904	-1761.53		97.5	-151.657	-4081.92		97.5	-2211.4	-2788.8
97.6	1.55298	-91.4442	-21.7608	-43.8688		97.6	-571.036	-2117.65	-756.004		97.6	-2.83004	-794.362		97.6	-360.281	-1756.55		97.6	-146.363	-4071.02		97.6	-2218.25	-2804.37
97.7	0.307461	-93.9353	-27.3657	-43.2461		97.7	-574.15	-2127	-760.674		97.7	-4.38694	-799.967		97.7	-353.742	-1754.99		97.7	-145.429	-4059.81		97.7	-2226.35	-2805.31
97.8	4.97817	-95.1808	-31.4136	-43.2461		97.8	-573.527	-2131.67	-767.525		97.8	-4.38694	-804.638		97.8	-350.628	-1768.38		97.8	-146.363	-4068.84		97.8	-2230.08	-2810.29
97.9	5.28955	-96.4263	-25.4974	-39.5095		97.9	-567.3	-2133.85	-756.938		97.9	-1.58452	-814.29		97.9	-359.036	-1769.62		97.9	-139.513	-4072.27		97.9	-2224.48	-2816.83
98	3.42127	-90.5101	-31.4136	-42.3119		98	-570.414	-2123.26	-755.692		98	-3.76418	-804.638		98	-365.886	-1764.02		98	-130.172	-4072.89		98	-2215.45	-2812.16
98.1	3.42127	-92.6898	-28.2998	-45.1144		98.1	-565.431	-2117.97	-749.153		98.1	-6.25523	-794.673		98.1	-362.149	-1762.77		98.1	-129.238	-4065.1		98.1	-2220.74	-2805.93
98.2	5.28955	-99.2287	-32.3478	-44.1802		98.2	-567.922	-2119.52	-758.183		98.2	-5.32108	-795.919		98.2	-361.215	-1778.97		98.2	-138.268	-4041.75		98.2	-2221.05	-2811.53
98.3	2.48713	-97.6718	-29.5453	-41.0664		98.3	-569.479	-2120.77	-762.231		98.3	-9.05765	-797.787		98.3	-364.952	-1762.15		98.3	-141.693	-4058.57		98.3	-2223.54	-2804.68
98.4	-0.62668	-98.606	-27.0543	-42.9347		98.4	-575.084	-2122.01	-762.854		98.4	-3.76418	-797.164		98.4	-366.509	-1769		98.4	-136.399	-4057.01		98.4	-2223.85	-2810.6
98.5	-2.49496	-95.8036	-24.8746	-45.4258		98.5	-575.707	-2123.88	-755.069		98.5	-4.38694	-794.673		98.5	-369.623	-1782.08		98.5	-140.447	-4045.49		98.5	-2221.05	-2809.35
98.6	-0.938061	-99.2287	-20.8267	-48.5396		98.6	-562.006	-2124.82	-760.052		98.6	-3.4528	-792.494		98.6	-360.281	-1764.33		98.6	-143.25	-4057.01		98.6	-2212.64	-2794.72
98.7	-2.49496	-95.8036	-17.4015	-46.6713		98.7	-557.336	-2115.16	-761.608		98.7	-2.51866	-781.595		98.7	-358.413	-1763.71		98.7	-138.579	-4037.08		98.7	-2212.02	-2786.31
98.8	-2.49496	-96.4263	-22.0722	-43.8688		98.8	-560.138	-2124.19	-766.591		98.8	-1.8959	-775.056		98.8	-359.97	-1759.97		98.8	-142.627	-4030.85		98.8	-2214.2	-2777.9
98.9	-2.80635	-96.1149	-24.8746	-42.9347		98.9	-562.006	-2122.95	-770.327		98.9	-1.58452	-776.925		98.9	-356.233	-1772.43		98.9	-142.627	-4041.75		98.9	-2218.87	-2780.4
99	-4.05187	-89.5759	-24.5632	-42.6233		99	-560.761	-2108.62	-767.213		99	-2.83004	-784.398		99	-356.545	-1770.56		99	-148.232	-4047.36		99	-2212.64	-2783.51
99.1	-0.62668	-92.067	-29.5453	-45.4258		99.1	-562.94	-2109.25	-745.105		99.1	-0.338993	-788.757		99.1	-352.185	-1761.53		99.1	-148.232	-4029.61		99.1	-2213.27	-2786
99.2	-1.8722	-91.4442	-23.0063	-46.3599		99.2	-555.779	-2121.39	-731.716		99.2	-0.0276127	-794.362		99.2	-357.167	-1756.86		99.2	-147.298	-4026.18		99.2	-2207.97	-2771.37
99.3	-1.8722	-93.6239	-25.4974	-51.9647		99.3	-564.186	-2118.9	-737.944		99.3	-4.07556	-790.937		99.3	-359.658	-1756.55		99.3	-151.346	-4036.46		99.3	-2211.09	-2786.62
99.4	-3.42911	-97.6718	-18.647	-46.3599		99.4	-564.497	-2117.97	-744.171		99.4	-0.338993	-784.398		99.4	-359.036	-1764.02		99.4	-148.854	-4025.87		99.4	-2213.58	-2785.69
99.5	-0.0039196	-102.031	-26.1202	-43.2461		99.5	-566.054	-2115.48	-746.351		99.5	0.595149	-773.188		99.5	-360.593	-1767.13		99.5	-136.711	-4033.65		99.5	-2199.88	-2784.75
99.6	-0.3153	-102.965	-22.0722	-44.1802		99.6	-568.545	-2120.15	-747.596		99.6	-0.961755	-770.386		99.6	-356.545	-1770.25		99.6	-137.333	-4015.28		99.6	-2200.5	-2778.22
99.7	-4.36325	-96.7377	-23.6291	-46.3599		99.7	-563.252	-2117.97	-743.237		99.7	-1.27314	-768.517		99.7	-347.203	-1757.17		99.7	-133.285	-4011.24		99.7	-2199.57	-2779.77
99.8	-3.74049	-91.7556	-20.8267	-43.5575		99.8	-566.366	-2103.33	-744.171		99.8	-2.51866	-767.895		99.8	-345.335	-1768.38		99.8	-134.531	-4002.52		99.8	-2188.67	-2786.93
99.9	-3.11773	-92.067	-22.0722	-40.4437		99.9	-561.695	-2112.05	-734.207		99.9	-3.4528	-763.847		99.9	-349.694	-1795.16		99.9	-142.627	-4009.06		99.9	-2187.73	-2798.14
100	-0.938061	-94.2467	-27.9884	-45.1144		100	-559.515	-2119.21	-751.021		100	-5.0097	-766.026		100	-348.76	-1785.19		100	-142.315	-4014.04		100	-2197.08	-2799.7
100.1	-4.05187	-94.2467	-24.8746	-46.6713		100.1	-555.779	-2119.21	-754.447		100.1	-3.4528	-762.601		100.1	-353.119	-1775.54		100.1	-148.543	-4018.09		100.1	-2202.37	-2792.85
100.2	-5.92015	-94.558	-22.3836	-47.6054		100.2	-548.305	-2110.18	-756.938		100.2	-5.63246	-761.356		100.2	-349.694	-1766.2		100.2	-144.184	-4017.15		100.2	-2185.55	-2788.18
100.3	-3.42911	-93.3125	-26.7429	-52.2761		100.3	-555.467	-2096.17	-754.135		100.3	-5.63246	-768.206		100.3	-343.467	-1778.03		100.3	-146.675	-4008.74		100.3	-2179.95	-2788.8
100.4	-4.36325	-93.0011	-28.6112	-52.5875		100.4	-554.533	-2099.59	-746.039		100.4	1.21791	-773.5		100.4	-346.269	-1772.12		100.4	-147.298	-4002.21		100.4	-2189.91	-2795.03
100.5	-7.78844	-88.019	-29.8567	-51.0306		100.5	-549.862	-2101.46	-745.728		100.5	1.21791	-762.913		100.5	-349.694	-1762.15		100.5	-143.872	-3983.21		100.5	-2187.73	-2808.42
100.6	-9.65672	-90.1987	-23.9405	-50.7192		100.6	-545.814	-2100.53	-751.021		100.6	0.595149	-761.667		100.6	-352.185	-1768.38		100.6	-138.268	-4001.27		100.6	-2177.77	-2813.71
100.7	-9.65672	-94.2467	-22.0722	-47.6054		100.7	-548.305	-2106.45	-743.237		100.7	4.33172	-759.799		100.7	-357.479	-1782.08		100.7	-129.549	-3994.73		100.7	-2182.75	-2813.4
100.8	-11.8364	-92.067	-22.3836	-48.5396		100.8	-545.192	-2104.58	-732.65		100.8	5.57724	-759.799		100.8	-353.119	-1778.97		100.8	-132.04	-3991.31		100.8	-2190.23	-2803.75
100.9	-11.525	-96.4263	-27.3657	-49.1623		100.9	-544.258	-2108.62	-733.896		100.9	1.52929	-755.439		100.9	-344.089	-1778.34		100.9	-131.729	-4005.01		100.9	-2184.31	-2795.03
101	-14.6388	-98.2946	-25.186	-49.1623		101	-548.617	-2099.28	-738.566		101	-1.27314	-756.996		101	-340.976	-1774.61		101	-132.04	-4012.17		101	-2181.2	-2800.32
101.1	-15.2616	-90.1987	-29.234	-46.9827		101.1	-541.766	-2099.91	-750.087		101.1	-0.338993	-764.158		101.1	-344.089	-1763.09		101.1	-127.058	-4015.91		101.1	-2186.18	-2800.64
101.2	-18.9981	-90.5101	-28.9226	-47.9168		101.2	-540.521	-2103.02	-757.56		101.2	-0.650374	-763.224		101.2	-340.976	-1757.79		101.2	-123.944	-4038.01		101.2	-2185.55	-2792.23
101.3	-27.094	-94.2467	-28.9226	-45.4258		101.3	-536.473	-2108.94	-767.836		101.3	-2.20728	-764.469		101.3	-345.335	-1766.2		101.3	-118.962	-4030.23		101.3	-2182.13	-2789.43
101.4	-34.2558	-100.786	-27.9884	-45.7371		101.4	-539.898	-2111.12	-753.513		101.4	-4.07556	-783.464		101.4	-346.58	-1769.94		101.4	-128.615	-4016.84		101.4	-2185.87	-2778.84
101.5	-34.8786	-100.474	-32.6591	-47.6054		101.5	-539.898	-2101.77	-746.974		101.5	-7.18937	-778.793		101.5	-350.628	-1768.07		101.5	-129.549	-4024.62		101.5	-2191.16	-2782.58
101.6	-34.5672	-95.4922	-33.2819	-44.4916		101.6	-538.03	-2100.22	-757.872		101.6	-2.83004	-773.811		101.6	-348.76	-1778.65		101.6	-127.369	-4024.31		101.6	-2195.52	-2796.59
101.7	-36.4355	-92.3784	-29.234	-41.0664		101.7	-543.635	-2088.39	-756.315		101.7	-6.25523	-769.14		101.7	-348.449	-1783.01		101.7	-128.926	-4020.89		101.7	-2192.41	-2799.39
101.8	-41.7289	-86.4621	-25.4974	-38.5754		101.8	-540.21	-2085.58	-745.105		101.8	-2.20728	-769.763		101.8	-347.826	-1779.28		101.8	-122.076	-4030.54		101.8	-2190.85	-2801.26
101.9	-45.1541	-84.2825	-34.216	-43.5575		101.9	-535.539	-2084.96	-737.321		101.9	-4.38694	-761.978		101.9	-346.892	-1792.04		101.9	-117.716	-4033.65		101.9	-2190.85	-2790.36
102	-38.3037	-86.7735	-38.264	-45.7371		102	-543.323	-2078.73	-753.513		102	-5.32108	-769.763		102	-346.892	-1798.89		102	-116.16	-4022.13		102	-2182.44	-2791.92
102.1	-35.5013	-88.3304	-32.9705	-47.9168		102.1	-546.126	-2070.64	-771.261		102.1	-1.8959	-757.308		102.1	-345.024	-1789.55		102.1	-117.405	-4016.53		102.1	-2173.1	-2793.16
102.2	-41.7289	-87.0849	-35.1502	-46.0485		102.2	-545.814	-2063.47	-766.902		102.2	-4.69832	-751.703		102.2	-349.694	-1777.41		102.2	-113.668	-4047.36		102.2	-2177.15	-2797.52
102.3	-47.6452	-78.0549	-32.9705	-42.0006		102.3	-541.766	-2071.57	-757.56		102.3	-0.650374	-755.128		102.3	-345.958	-1789.86		102.3	-109.932	-4050.47		102.3	-2187.73	-2790.05
102.4	-42.6631	-77.4321	-32.3478	-46.6713		102.4	-533.982	-2066.59	-748.53		102.4	-0.338993	-756.062		102.4	-346.269	-1796.4		102.4	-113.046	-4041.75		102.4	-2179.95	-2793.16
102.5	-43.5972	-81.48	-37.0185	-46.3599		102.5	-535.539	-2072.82	-750.399		102.5	-2.83004	-766.649		102.5	-344.089	-1791.11		102.5	-113.98	-4054.21		102.5	-2170.61	-2803.44
102.6	-42.0403	-83.6597	-32.9705	-47.6054		102.6	-547.371	-2082.47	-749.153		102.6	1.84067	-773.5		102.6	-339.419	-1786.75		102.6	-112.112	-4050.78		102.6	-2171.23	-2790.36
102.7	-44.22	-91.1328	-37.3299	-47.294		102.7	-547.371	-2081.53	-743.86		102.7	-1.27314	-777.859		102.7	-345.024	-1782.39		102.7	-111.177	-4029.61		102.7	-2179.33	-2784.44
102.8	-42.9744	-91.1328	-33.2819	-45.4258		102.8	-551.419	-2074.37	-745.728		102.8	-0.961755	-778.482		102.8	-341.91	-1769.62		102.8	-108.375	-4024.31		102.8	-2174.66	-2780.4
102.9	-43.5972	-91.4442	-33.2819	-46.9827		102.9	-551.731	-2073.75	-750.399		102.9	-1.27314	-768.206		102.9	-344.089	-1759.97		102.9	-111.489	-4037.08		102.9	-2171.23	-2790.36
103	-49.2021	-93.9353	-33.2819	-48.2282		103	-549.551	-2065.34	-746.039		103	-0.338993	-765.092		103	-350.317	-1768.69		103	-116.471	-4041.75		103	-2174.34	-2779.15
103.1	-46.0883	-99.2287	-30.7909	-46.9827		103.1	-546.437	-2058.18	-732.65		103.1	-1.8959	-769.14		103.1	-349.694	-1768.07		103.1	-113.357	-4052.03		103.1	-2166.25	-2787.25
103.2	-46.0883	-100.163	-32.0364	-52.5875		103.2	-548.305	-2055.69	-730.47		103.2	-3.76418	-759.799		103.2	-345.958	-1772.43		103.2	-114.291	-4043.93		103.2	-2160.64	-2785.07
103.3	-40.7948	-101.408	-29.5453	-47.6054		103.3	-552.042	-2046.35	-720.506		103.3	-0.961755	-761.667		103.3	-341.598	-1769.94		103.3	-116.16	-4053.58		103.3	-2159.09	-2792.23
103.4	-46.0883	-94.558	-32.3478	-46.9827		103.4	-550.174	-2045.41	-722.997		103.4	-5.63246	-769.14		103.4	-339.107	-1780.83		103.4	-110.243	-4037.08		103.4	-2158.46	-2792.54
103.5	-43.9086	-96.1149	-38.5754	-51.9647		103.5	-552.665	-2058.8	-735.452		103.5	-2.83004	-771.32		103.5	-341.598	-1752.19		103.5	-111.177	-4043.31		103.5	-2163.14	-2783.51
103.6	-42.0403	-92.067	-33.2819	-49.4737		103.6	-554.844	-2063.79	-722.375		103.6	-1.58452	-775.368		103.6	-338.173	-1753.74		103.6	-112.734	-4046.73		103.6	-2157.53	-2777.28
103.7	-40.7948	-93.0011	-28.9226	-46.6713		103.7	-559.827	-2059.74	-716.77		103.7	-0.650374	-781.284		103.7	-339.107	-1750.94		103.7	-117.094	-4023.69		103.7	-2154.42	-2786.93
103.8	-38.6151	-92.6898	-33.5933	-43.5575		103.8	-560.449	-2061.29	-707.74		103.8	-1.58452	-779.104		103.8	-338.796	-1741.91		103.8	-120.83	-4032.1		103.8	-2160.96	-2780.71
103.9	-37.681	-87.7077	-32.0364	-49.7851		103.9	-564.186	-2068.77	-707.117		103.9	0.906529	-779.416		103.9	-334.437	-1754.68		103.9	-119.585	-4046.73		103.9	-2168.43	-2785.07
104	-38.6151	-90.8215	-34.5274	-47.6054		104	-562.629	-2060.67	-722.375		104	-0.338993	-775.991		104	-334.437	-1748.14		104	-116.16	-4047.04		104	-2173.41	-2780.08
104.1	-39.5493	-92.3784	-33.2819	-46.3599		104.1	-552.665	-2051.33	-736.075		104.1	1.52929	-764.158		104.1	-330.7	-1741.6		104.1	-113.98	-4042.06		104.1	-2177.77	-2775.41
104.2	-37.0582	-90.8215	-31.4136	-42.9347		104.2	-551.731	-2052.26	-733.896		104.2	3.39757	-768.517		104.2	-335.682	-1752.81		104.2	-115.537	-4035.52		104.2	-2181.2	-2772.61
104.3	-35.1899	-89.8873	-31.4136	-42.9347		104.3	-552.042	-2058.8	-724.554		104.3	6.51138	-782.53		104.3	-338.173	-1757.48		104.3	-114.603	-4013.41		104.3	-2175.28	-2779.15
104.4	-33.9444	-91.4442	-33.9047	-40.4437		104.4	-552.042	-2052.26	-713.967		104.4	8.06828	-779.416		104.4	-342.221	-1760.91		104.4	-113.046	-3996.6		104.4	-2172.79	-2788.8
104.5	-32.3875	-89.5759	-29.234	-37.0185		104.5	-551.108	-2046.97	-710.231		104.5	4.33172	-780.039		104.5	-333.814	-1774.92		104.5	-111.8	-3996.91		104.5	-2167.49	-2793.16
104.6	-31.4534	-84.5938	-30.7909	-37.9526		104.6	-554.222	-2050.4	-724.243		104.6	3.39757	-778.482		104.6	-333.191	-1773.36		104.6	-110.243	-4016.53		104.6	-2162.82	-2787.25
104.7	-28.3396	-79.3004	-26.7429	-40.1323		104.7	-554.533	-2051.02	-729.848		104.7	-0.961755	-775.991		104.7	-331.011	-1749.38		104.7	-107.752	-4003.14		104.7	-2158.78	-2790.98
104.8	-32.3875	-77.7435	-30.4795	-46.3599		104.8	-554.533	-2050.71	-729.225		104.8	0.283768	-785.643		104.8	-336.305	-1749.38		104.8	-108.064	-4004.07		104.8	-2155.35	-2794.1
104.9	-31.142	-77.4321	-29.8567	-46.9827		104.9	-552.976	-2060.05	-725.177		104.9	3.39757	-763.224		104.9	-341.287	-1771.18		104.9	-113.98	-4028.67		104.9	-2153.17	-2788.8
105	-33.3216	-77.1207	-31.4136	-44.803		105	-566.366	-2056.94	-727.045		105	6.82276	-763.224		105	-343.155	-1773.05		105	-124.567	-4049.22		105	-2150.06	-2781.64
105.1	-32.6989	-78.6776	-26.7429	-48.5396		105.1	-566.366	-2052.89	-719.261		105.1	4.6431	-771.008		105.1	-343.467	-1763.71		105.1	-125.501	-4057.01		105.1	-2146.01	-2781.33
105.2	-28.3396	-72.7614	-26.4315	-48.8509		105.2	-563.563	-2057.25	-718.327		105.2	6.2	-769.452		105.2	-335.682	-1753.43		105.2	-123.633	-4059.5		105.2	-2154.73	-2784.44
105.3	-34.5672	-75.5638	-28.9226	-50.4078		105.3	-558.581	-2057.87	-725.177		105.3	5.57724	-754.505		105.3	-331.323	-1767.13		105.3	-121.142	-4042.68		105.3	-2174.34	-2769.81
105.4	-37.0582	-80.8573	-31.4136	-51.6534		105.4	-554.844	-2047.28	-733.896		105.4	4.33172	-742.361		105.4	-327.586	-1754.06		105.4	-121.453	-4047.98		105.4	-2164.69	-2771.68
105.5	-33.9444	-87.7077	-32.0364	-42.6233		105.5	-558.892	-2047.59	-725.8		105.5	4.95448	-728.972		105.5	-330.077	-1754.06		105.5	-119.585	-4053.89		105.5	-2160.64	-2780.4
105.6	-33.3216	-87.3963	-32.3478	-37.0185		105.6	-556.09	-2052.26	-722.997		105.6	4.95448	-719.631		105.6	-331.011	-1760.28		105.6	-123.01	-4037.39		105.6	-2158.78	-2789.43
105.7	-31.4534	-85.528	-31.725	-40.4437		105.7	-554.533	-2048.22	-713.656		105.7	4.6431	-719.008		105.7	-334.125	-1761.22		105.7	-125.19	-4031.48		105.7	-2143.52	-2790.05
105.8	-31.4534	-87.7077	-35.4616	-45.4258		105.8	-549.551	-2044.17	-717.081		105.8	7.13414	-700.948		105.8	-333.191	-1760.59		105.8	-131.417	-4039.88		105.8	-2139.16	-2791.92
105.9	-28.3396	-80.8573	-29.8567	-45.1144		105.9	-553.599	-2034.2	-721.129		105.9	7.7569	-709.978		105.9	-330.389	-1760.28		105.9	-136.711	-4056.07		105.9	-2140.4	-2788.18
106	-27.7168	-84.5938	-27.0543	-45.1144		106	-563.563	-2031.71	-727.979		106	4.33172	-720.565		106	-329.143	-1749.7		106	-138.268	-4071.33		106	-2138.22	-2787.56
106.1	-23.3575	-87.3963	-28.6112	-49.1623		106.1	-561.383	-2044.17	-723.931		106.1	3.70895	-717.762		106.1	-334.748	-1759.66		106.1	-138.579	-4053.27		106.1	-2136.98	-2782.58
106.2	-17.1299	-85.2166	-30.7909	-43.8688		106.2	-556.713	-2039.81	-724.554		106.2	1.52929	-725.547		106.2	-341.91	-1759.04		106.2	-137.333	-4061.68		106.2	-2153.17	-2781.95
106.3	-20.8664	-87.0849	-33.2819	-38.5754		106.3	-551.731	-2038.88	-718.015		106.3	2.77481	-739.559		106.3	-337.55	-1759.04		106.3	-137.022	-4053.58		106.3	-2153.48	-2782.26
106.4	-19.9323	-89.8873	-32.0364	-37.0185		106.4	-542.701	-2040.12	-725.8		106.4	0.906529	-731.152		106.4	-338.485	-1746.89		106.4	-129.238	-4043.62		106.4	-2141.34	-2769.81
106.5	-24.9144	-90.1987	-32.9705	-40.755		106.5	-549.862	-2046.97	-724.243		106.5	-0.650374	-723.056		106.5	-327.898	-1745.03		106.5	-127.058	-4033.03		106.5	-2129.51	-2761.4
106.6	-22.4233	-91.4442	-29.5453	-40.1323		106.6	-564.186	-2042.92	-727.357		106.6	-1.58452	-735.511		106.6	-330.7	-1750.32		106.6	-133.597	-4054.52		106.6	-2123.9	-2760.47
106.7	-22.1119	-90.8215	-33.5933	-42.0006		106.7	-555.467	-2043.23	-709.608		106.7	-1.8959	-737.691		106.7	-328.52	-1754.37		106.7	-137.645	-4071.95		106.7	-2122.97	-2754.55
106.8	-19.6209	-92.6898	-33.9047	-36.7071		106.8	-549.862	-2037.63	-706.494		106.8	4.33172	-730.84		106.8	-323.85	-1756.55		106.8	-136.088	-4078.49		106.8	-2118.61	-2766.69
106.9	-22.1119	-90.1987	-28.9226	-34.8388		106.9	-550.174	-2035.45	-705.249		106.9	-0.338993	-729.906		106.9	-324.784	-1751.56		106.9	-146.675	-4065.1		106.9	-2129.51	-2779.15
107	-17.7526	-90.1987	-30.4795	-37.3299		107	-550.797	-2037.01	-714.279		107	1.52929	-737.068		107	-330.077	-1746.58		107	-151.968	-4065.42		107	-2132.31	-2781.02
107.1	-14.6388	-89.8873	-33.2819	-39.1981		107.1	-553.599	-2035.14	-712.41		107.1	1.52929	-747.655		107.1	-332.88	-1753.74		107.1	-145.118	-4059.19		107.1	-2123.9	-2790.98
107.2	-12.7705	-86.7735	-35.1502	-38.5754		107.2	-557.336	-2033.58	-709.297		107.2	-1.58452	-746.409		107.2	-335.993	-1772.12		107.2	-142.004	-4059.19		107.2	-2118.3	-2786.62
107.3	-16.5071	-80.5459	-38.5754	-36.0843		107.3	-554.844	-2029.85	-722.375		107.3	-0.338993	-742.361		107.3	-335.993	-1772.12		107.3	-137.022	-4055.14		107.3	-2130.75	-2787.87
107.4	-14.9502	-79.3004	-38.5754	-37.6412		107.4	-544.88	-2027.98	-728.913		107.4	-1.27314	-747.966		107.4	-329.454	-1766.51		107.4	-133.908	-4063.55		107.4	-2133.87	-2790.36
107.5	-15.8843	-81.1687	-37.3299	-30.1681		107.5	-548.928	-2028.29	-733.896		107.5	2.15205	-747.966		107.5	-331.634	-1765.89		107.5	-123.633	-4051.4		107.5	-2122.97	-2790.67
107.6	-15.8843	-81.1687	-35.1502	-32.6591		107.6	-548.305	-2026.11	-735.141		107.6	-0.338993	-742.361		107.6	-330.7	-1748.14		107.6	-122.076	-4040.51		107.6	-2108.95	-2789.43
107.7	-18.6868	-78.6776	-34.5274	-35.4616		107.7	-544.258	-2018.95	-723.309		107.7	-1.8959	-736.134		107.7	-324.472	-1749.07		107.7	-125.19	-4040.19		107.7	-2108.33	-2790.98
107.8	-16.5071	-74.0069	-35.1502	-36.0843		107.8	-540.21	-2024.86	-699.955		107.8	-1.27314	-746.098		107.8	-322.915	-1751.88		107.8	-131.106	-4043.93		107.8	-2106.78	-2787.56
107.9	-16.8185	-73.0728	-43.8688	-37.3299		107.9	-540.521	-2030.47	-686.254		107.9	-3.4528	-735.822		107.9	-320.736	-1754.37		107.9	-123.633	-4050.78		107.9	-2104.28	-2792.54
108	-22.7347	-75.8752	-41.0664	-41.0664		108	-539.587	-2028.91	-700.889		108	-1.8959	-721.499		108	-327.275	-1741.91		108	-115.225	-4026.49		108	-2108.95	-2796.9
108.1	-16.5071	-74.3183	-36.3957	-38.5754		108.1	-534.605	-2026.73	-709.608		108.1	-0.0276127	-721.81		108.1	-327.275	-1736.62		108.1	-119.273	-4038.01		108.1	-2113.31	-2790.36
108.2	-17.4412	-67.7793	-34.5274	-39.1981		108.2	-540.521	-2023.62	-718.015		108.2	-1.58452	-718.385		108.2	-324.472	-1733.5		108.2	-123.633	-4038.64		108.2	-2119.23	-2790.67
108.3	-17.4412	-69.3362	-35.1502	-36.7071		108.3	-542.701	-2022.68	-712.41		108.3	-1.58452	-728.972		108.3	-320.113	-1745.03		108.3	-121.453	-4051.4		108.3	-2112.38	-2798.77
108.4	-16.5071	-71.2045	-38.5754	-32.0364		108.4	-544.88	-2017.08	-706.805		108.4	-0.961755	-730.529		108.4	-315.442	-1756.86		108.4	-120.519	-4034.28		108.4	-2111.13	-2791.29
108.5	-17.4412	-72.1386	-26.1202	-37.6412		108.5	-533.671	-2020.82	-702.446		108.5	2.15205	-724.924		108.5	-321.67	-1771.49		108.5	-123.321	-4053.89		108.5	-2115.49	-2794.72
108.6	-15.2616	-76.1866	-32.0364	-39.8209		108.6	-526.509	-2022.37	-702.758		108.6	1.84067	-724.613		108.6	-322.604	-1768.38		108.6	-125.501	-4062.61		108.6	-2117.36	-2797.83
108.7	-15.2616	-71.8272	-30.1681	-37.0185		108.7	-536.784	-1994.97	-715.213		108.7	2.77481	-711.846		108.7	-321.047	-1758.73		108.7	-124.878	-4051.71		108.7	-2116.12	-2810.29
108.8	-16.5071	-74.9411	-31.4136	-40.1323		108.8	-547.06	-1990.92	-719.572		108.8	4.33172	-694.097		108.8	-315.131	-1757.48		108.8	-127.992	-4038.64		108.8	-2125.15	-2814.96
108.9	-12.4591	-75.5638	-29.5453	-42.6233		108.9	-550.797	-2006.8	-710.231		108.9	2.15205	-690.984		108.9	-320.113	-1756.86		108.9	-126.124	-4027.12		108.9	-2138.22	-2808.42
109	-15.2616	-78.3662	-31.4136	-42.3119		109	-548.617	-2017.39	-708.985		109	2.46343	-690.984		109	-318.556	-1754.06		109	-122.076	-4048.29		109	-2127.95	-2806.86
109.1	-16.1957	-77.7435	-28.6112	-43.5575		109.1	-541.144	-2010.23	-711.788		109.1	1.52929	-697.834		109.1	-325.718	-1744.09		109.1	-120.207	-4046.73		109.1	-2124.52	-2804.37
109.2	-14.9502	-80.2345	-28.2998	-43.2461		109.2	-542.078	-2009.61	-711.476		109.2	-0.650374	-697.211		109.2	-329.766	-1753.43		109.2	-117.716	-4050.47		109.2	-2132.31	-2800.32
109.3	-14.6388	-75.2524	-30.4795	-43.8688		109.3	-540.521	-2001.51	-719.572		109.3	1.21791	-695.654		109.3	-326.341	-1753.74		109.3	-116.471	-4033.65		109.3	-2140.72	-2803.44
109.4	-12.7705	-75.2524	-29.5453	-44.1802		109.4	-536.784	-1991.55	-714.59		109.4	-1.27314	-700.948		109.4	-318.868	-1749.7		109.4	-109.621	-4038.01		109.4	-2137.91	-2795.34
109.5	-11.8364	-78.989	-29.234	-48.8509		109.5	-527.132	-1988.43	-715.213		109.5	-1.58452	-702.816		109.5	-318.245	-1750.01		109.5	-107.441	-4048.91		109.5	-2127.95	-2791.29
109.6	-11.8364	-77.4321	-27.3657	-42.0006		109.6	-535.539	-2002.44	-719.261		109.6	-1.27314	-698.145		109.6	-316.377	-1749.38		109.6	-112.423	-4025.56		109.6	-2128.88	-2787.25
109.7	-17.1299	-83.3483	-29.234	-40.1323		109.7	-532.425	-2004.31	-722.375		109.7	-0.961755	-707.798		109.7	-315.754	-1740.04		109.7	-108.375	-4038.01		109.7	-2131.37	-2801.26
109.8	-14.016	-86.1508	-31.4136	-37.6412		109.8	-536.473	-2006.8	-733.584		109.8	-0.0276127	-716.828		109.8	-318.868	-1738.8		109.8	-107.129	-4032.72		109.8	-2128.88	-2801.26
109.9	-16.1957	-86.4621	-32.3478	-44.803		109.9	-533.048	-2018.01	-742.614		109.9	1.52929	-715.271		109.9	-322.604	-1746.58		109.9	-99.6564	-4027.12		109.9	-2129.19	-2802.19
110	-13.7047	-81.7914	-32.0364	-45.7371		110	-532.736	-2018.01	-741.057		110	4.02034	-723.367		110	-321.359	-1745.34		110	-103.704	-4028.98		110	-2119.54	-2794.72
C
	K368-E				K368-E + Neto1				K368-E + Neto2				K375_379_382H376-E				K375_379_382H376-E + Neto1				K375_379_382H376-E + Neto2
Time (ms)	cell 1 -90V	cell 1 90V		Time (ms)	-90 mV	+90 mV		Time (ms)	-90 mV	+90 mV		Time (ms)	-90 mV	+90 mV		Time (ms)	-90 mV	+90 mV		Time (ms)	-90 mV	+90 mV
0	-0.0186577	2.52201		0	8.69794	-280.853		0	26.2091	-99.617		0	309.008	-3063.56		0	13.1675	-59.1983		0	12.9399	-86.2349
0.1	-0.641419	1.89925		0.1	16.7938	-285.213		0.1	29.3229	-98.9942		0.1	307.762	-3063.25		0.1	13.1675	-59.1983		0.1	12.3172	-85.6121
0.2	1.84963	3.14478		0.2	15.2369	-293.309		0.2	29.0116	-94.0121		0.2	306.828	-3061.69		0.2	11.6106	-60.7552		0.2	10.1375	-86.8577
0.3	-2.5097	2.52201		0.3	9.94346	-292.686		0.3	28.7002	-97.4373		0.3	306.517	-3061.69		0.3	14.4131	-60.1325		0.3	15.7423	-86.8577
0.4	1.22686	3.76754		0.4	14.6142	-289.572		0.4	28.7002	-98.0601		0.4	305.894	-3060.45		0.4	12.8562	-60.1325		0.4	11.6944	-85.6121
0.5	-0.0186577	3.14478		0.5	11.8117	-291.129		0.5	28.0774	-95.2577		0.5	311.187	-3060.45		0.5	8.49683	-61.378		0.5	12.0058	-86.5463
0.6	-0.641419	3.76754		0.6	7.14104	-286.147		0.6	28.3888	-98.6828		0.6	308.696	-3060.45		0.6	10.9879	-58.8869		0.6	13.5627	-87.4804
0.7	2.47239	1.27649		0.7	2.15895	-289.261		0.7	23.7181	-97.7487		0.7	311.187	-3063.56		0.7	12.5448	-61.378		0.7	14.8082	-85.6121
0.8	1.84963	2.52201		0.8	8.69794	-290.506		0.8	26.8319	-94.6349		0.8	309.008	-3064.5		0.8	11.922	-59.1983		0.8	14.4968	-86.8577
0.9	1.22686	2.52201		0.9	10.5662	-287.081		0.9	28.0774	-95.2577		0.9	305.894	-3064.18		0.9	10.9879	-58.8869		0.9	13.8741	-89.3487
1	-0.641419	0.65373		1	7.7638	-287.081		1	22.784	-94.9463		1	303.714	-3061.07		1	12.2334	-60.7552		1	11.6944	-85.9235
1.1	-0.641419	4.3903		1.1	3.09309	-286.77		1.1	29.3229	-94.6349		1.1	306.828	-3060.76		1.1	13.4789	-58.5756		1.1	16.6765	-85.9235
1.2	-0.641419	3.14478		1.2	7.7638	-287.704		1.2	25.8978	-96.8146		1.2	307.139	-3063.87		1.2	13.7903	-60.1325		1.2	16.0537	-85.9235
1.3	1.22686	1.27649		1.3	9.3207	-293.931		1.3	28.3888	-98.0601		1.3	309.63	-3069.17		1.3	12.8562	-60.7552		1.3	12.9399	-84.9894
1.4	-1.26418	5.01306		1.4	8.38656	-295.488		1.4	27.1433	-97.1259		1.4	311.187	-3064.5		1.4	12.5448	-60.4438		1.4	12.0058	-87.7918
1.5	-1.88694	5.63582		1.5	7.45242	-290.506		1.5	24.6522	-96.8146		1.5	310.876	-3062		1.5	11.6106	-59.5097		1.5	12.3172	-86.5463
1.6	0.604104	3.14478		1.6	9.94346	-292.063		1.6	28.3888	-94.6349		1.6	308.385	-3066.36		1.6	13.1675	-61.0666		1.6	14.4968	-84.9894
1.7	-1.88694	0.0309696		1.7	9.63208	-290.506		1.7	29.3229	-101.174		1.7	308.385	-3061.07		1.7	11.2993	-62.6235		1.7	16.9879	-90.9056
1.8	-3.13246	1.27649		1.8	8.69794	-292.374		1.8	27.4547	-95.569		1.8	306.828	-3061.07		1.8	11.2993	-62.0007		1.8	10.7603	-89.9715
1.9	-0.0186577	3.14478		1.9	10.2548	-295.8		1.9	26.8319	-98.3715		1.9	312.433	-3063.25		1.9	11.6106	-60.4438		1.9	9.51474	-85.6121
2	0.604104	3.14478		2	12.7459	-293.309		2	27.4547	-94.6349		2	310.876	-3056.09		2	10.3651	-59.8211		2	12.6285	-85.6121
2.1	1.84963	1.27649		2.1	13.9914	-291.44		2.1	25.8978	-98.0601		2.1	310.253	-3062		2.1	11.6106	-60.7552		2.1	16.0537	-87.7918
2.2	-0.0186577	2.52201		2.2	13.3686	-288.326		2.2	24.6522	-94.0121		2.2	309.319	-3059.51		2.2	12.5448	-61.6894		2.2	16.9879	-84.9894
2.3	-0.0186577	1.27649		2.3	10.2548	-296.422		2.3	28.7002	-97.1259		2.3	308.385	-3058.58		2.3	11.2993	-60.7552		2.3	12.6285	-88.1032
2.4	1.22686	-0.591791		2.4	12.4345	-295.488		2.4	25.275	-97.4373		2.4	306.517	-3056.4		2.4	11.922	-62.6235		2.4	14.4968	-87.4804
2.5	0.604104	0.65373		2.5	11.5004	-293.62		2.5	28.0774	-99.3056		2.5	308.074	-3054.53		2.5	14.4131	-61.6894		2.5	11.383	-88.1032
2.6	-1.88694	0.65373		2.6	9.63208	-292.374		2.6	21.5384	-94.9463		2.6	307.451	-3057.33		2.6	13.1675	-59.1983		2.6	11.6944	-86.5463
2.7	-1.26418	1.27649		2.7	9.94346	-291.752		2.7	27.766	-98.0601		2.7	302.78	-3060.76		2.7	11.922	-60.1325		2.7	14.1854	-86.2349
2.8	-2.5097	0.65373		2.8	16.4825	-289.261		2.8	28.0774	-97.7487		2.8	304.337	-3061.69		2.8	13.4789	-61.0666		2.8	14.8082	-86.8577
2.9	1.22686	1.27649		2.9	16.4825	-293.309		2.9	26.5205	-96.8146		2.9	306.828	-3057.02		2.9	12.8562	-59.1983		2.9	14.1854	-89.9715
3	-2.5097	4.3903		3	11.5004	-289.572		3	25.5864	-100.551		3	306.205	-3061.69		3	11.2993	-60.1325		3	13.8741	-88.7259
3.1	-1.88694	2.52201		3.1	8.38656	-293.931		3.1	25.275	-98.3715		3.1	303.714	-3061.69		3.1	10.9879	-60.1325		3.1	11.6944	-85.6121
3.2	0.604104	-0.591791		3.2	8.38656	-294.554		3.2	29.6343	-101.174		3.2	304.96	-3060.45		3.2	11.922	-61.378		3.2	13.2513	-84.678
3.3	-1.26418	4.3903		3.3	10.5662	-291.129		3.3	26.8319	-98.0601		3.3	309.942	-3062.63		3.3	10.9879	-62.3121		3.3	15.431	-89.6601
3.4	-0.0186577	4.3903		3.4	10.2548	-287.392		3.4	25.8978	-100.551		3.4	309.008	-3064.18		3.4	8.49683	-60.1325		3.4	17.6106	-85.6121
3.5	-0.0186577	1.27649		3.5	10.8776	-290.818		3.5	26.2091	-96.1918		3.5	307.451	-3057.65		3.5	11.2993	-60.4438		3.5	14.4968	-88.1032
3.6	-1.88694	3.14478		3.6	11.8117	-292.063		3.6	29.0116	-97.1259		3.6	304.337	-3053.29		3.6	12.2334	-59.8211		3.6	16.3651	-86.8577
3.7	-1.26418	3.76754		3.7	10.5662	-294.865		3.7	25.8978	-98.6828		3.7	304.337	-3054.84		3.7	13.7903	-60.1325		3.7	12.9399	-91.5284
3.8	-0.641419	5.01306		3.8	9.3207	-291.752		3.8	27.766	-97.4373		3.8	309.63	-3057.65		3.8	13.1675	-60.1325		3.8	13.8741	-87.7918
3.9	-1.26418	5.01306		3.9	12.7459	-294.554		3.9	27.1433	-95.2577		3.9	307.451	-3057.65		3.9	15.0358	-60.4438		3.9	15.1196	-86.8577
4	-1.26418	3.14478		4	12.7459	-293.309		4	26.5205	-99.9284		4	309.008	-3057.02		4	13.7903	-62.6235		4	18.5448	-86.8577
4.1	-0.0186577	5.63582		4.1	13.68	-297.979		4.1	27.766	-98.6828		4.1	301.535	-3059.2		4.1	11.922	-61.378		4.1	15.7423	-85.6121
4.2	-2.5097	4.3903		4.2	13.0573	-296.422		4.2	23.4067	-95.569		4.2	304.96	-3058.27		4.2	12.5448	-63.2463		4.2	14.4968	-88.4146
4.3	-1.26418	1.89925		4.3	15.8597	-297.045		4.3	25.8978	-96.1918		4.3	307.762	-3057.02		4.3	12.5448	-61.0666		4.3	13.2513	-86.8577
4.4	0.604104	2.52201		4.4	12.4345	-297.668		4.4	27.766	-96.5032		4.4	309.008	-3058.27		4.4	13.1675	-61.6894		4.4	14.1854	-89.3487
4.5	2.47239	1.27649		4.5	8.07518	-292.997		4.5	30.2571	-96.5032		4.5	304.96	-3056.71		4.5	15.3472	-63.5576		4.5	11.383	-87.7918
4.6	-0.0186577	2.52201		4.6	9.3207	-291.752		4.6	31.814	-98.6828		4.6	304.337	-3056.4		4.6	13.7903	-63.5576		4.6	17.6106	-88.1032
4.7	-1.88694	4.3903		4.7	11.5004	-290.195		4.7	31.5026	-98.3715		4.7	303.714	-3059.2		4.7	14.4131	-63.2463		4.7	16.0537	-89.6601
4.8	-0.0186577	1.27649		4.8	13.0573	-290.506		4.8	26.8319	-98.9942		4.8	306.517	-3054.53		4.8	11.922	-62.9349		4.8	15.1196	-83.1211
4.9	-1.26418	1.89925		4.9	10.5662	-290.818		4.9	30.2571	-97.7487		4.9	307.139	-3056.71		4.9	12.5448	-62.3121		4.9	11.6944	-88.7259
5	-2.5097	1.27649		5	6.82966	-288.015		5	28.3888	-98.6828		5	307.139	-3057.96		5	15.0358	-63.2463		5	15.7423	-85.9235
5.1	-3.75523	2.52201		5.1	11.5004	-289.261		5.1	25.5864	-96.5032		5.1	307.451	-3056.4		5.1	13.7903	-62.3121		5.1	18.8562	-93.3966
5.2	-1.26418	1.89925		5.2	11.8117	-290.506		5.2	32.7481	-96.5032		5.2	304.337	-3058.27		5.2	11.922	-61.378		5.2	14.1854	-86.8577
5.3	-4.37799	2.52201		5.3	7.14104	-288.949		5.3	29.9457	-97.1259		5.3	303.714	-3054.22		5.3	14.1017	-61.0666		5.3	13.5627	-85.9235
5.4	-1.26418	0.65373		5.4	9.94346	-286.458		5.4	27.4547	-97.1259		5.4	305.894	-3058.27		5.4	12.5448	-61.6894		5.4	15.431	-88.1032
5.5	-1.26418	0.0309696		5.5	11.8117	-285.835		5.5	31.814	-98.3715		5.5	302.469	-3055.47		5.5	12.2334	-63.2463		5.5	14.8082	-88.7259
5.6	-1.26418	1.27649		5.6	10.2548	-288.326		5.6	26.5205	-93.3894		5.6	303.714	-3058.58		5.6	10.6765	-61.0666		5.6	17.6106	-83.4325
5.7	-1.26418	0.65373		5.7	7.7638	-290.818		5.7	27.766	-97.7487		5.7	300.912	-3058.27		5.7	9.74235	-63.2463		5.7	16.6765	-86.8577
5.8	-1.26418	1.27649		5.8	7.7638	-284.279		5.8	29.9457	-96.8146		5.8	306.517	-3056.09		5.8	7.56269	-63.2463		5.8	14.1854	-86.2349
5.9	-1.88694	2.52201		5.9	10.2548	-288.326		5.9	32.7481	-95.569		5.9	304.337	-3054.84		5.9	10.9879	-63.2463		5.9	12.9399	-85.9235
6	-1.26418	1.89925		6	12.7459	-283.033		6	27.1433	-96.8146		6	301.223	-3060.76		6	9.74235	-59.5097		6	12.9399	-90.2828
6.1	-0.641419	0.65373		6.1	8.38656	-290.818		6.1	28.7002	-96.5032		6.1	305.894	-3061.69		6.1	9.74235	-58.5756		6.1	14.1854	-88.4146
6.2	1.84963	2.52201		6.2	8.38656	-292.686		6.2	29.3229	-96.8146		6.2	308.696	-3062.94		6.2	13.1675	-62.0007		6.2	16.0537	-84.9894
6.3	1.84963	1.27649		6.3	9.00933	-292.686		6.3	29.0116	-94.0121		6.3	303.091	-3057.65		6.3	8.49683	-62.6235		6.3	13.5627	-86.2349
6.4	-1.26418	2.52201		6.4	11.8117	-292.063		6.4	25.8978	-95.2577		6.4	303.091	-3058.89		6.4	10.0537	-60.4438		6.4	14.8082	-88.1032
6.5	-2.5097	2.52201		6.5	10.2548	-298.291		6.5	23.7181	-95.569		6.5	305.271	-3059.51		6.5	9.74235	-62.3121		6.5	12.0058	-86.8577
6.6	-4.37799	0.0309696		6.6	9.94346	-296.734		6.6	25.275	-97.4373		6.6	302.157	-3058.89		6.6	8.18545	-63.869		6.6	12.3172	-87.169
6.7	-1.26418	1.27649		6.7	10.5662	-294.865		6.7	25.275	-97.4373		6.7	303.091	-3062.32		6.7	10.6765	-65.4259		6.7	14.4968	-86.2349
6.8	-1.88694	3.76754		6.8	9.63208	-295.8		6.8	24.3409	-100.24		6.8	300.6	-3056.71		6.8	11.2993	-64.1804		6.8	13.8741	-84.9894
6.9	-4.37799	-1.21455		6.9	8.38656	-295.8		6.9	29.0116	-98.6828		6.9	300.6	-3057.96		6.9	9.11959	-63.2463		6.9	13.5627	-87.7918
7	-2.5097	4.3903		7	5.58413	-295.488		7	23.7181	-96.5032		7	302.469	-3055.78		7	9.74235	-62.6235		7	13.2513	-86.8577
7.1	-1.88694	2.52201		7.1	9.3207	-293.62		7.1	28.3888	-98.9942		7.1	300.6	-3054.84		7.1	10.9879	-60.7552		7.1	18.2334	-87.169
7.2	1.22686	2.52201		7.2	10.8776	-288.949		7.2	29.0116	-96.8146		7.2	303.714	-3062		7.2	8.49683	-64.8032		7.2	12.3172	-86.2349
7.3	-1.26418	1.27649		7.3	10.2548	-292.997		7.3	25.275	-98.3715		7.3	303.714	-3063.56		7.3	2.26921	-63.2463		7.3	12.6285	-86.2349
7.4	-1.26418	2.52201		7.4	8.38656	-292.997		7.4	28.7002	-93.3894		7.4	306.205	-3062.32		7.4	3.82612	-62.9349		7.4	14.4968	-87.169
7.5	-0.641419	0.0309696		7.5	10.2548	-293.62		7.5	29.0116	-96.1918		7.5	304.96	-3063.56		7.5	8.49683	-66.0487		7.5	14.8082	-87.7918
7.6	-0.641419	1.89925		7.6	11.5004	-294.865		7.6	29.9457	-96.5032		7.6	308.385	-3060.76		7.6	11.2993	-64.1804		7.6	13.5627	-86.5463
7.7	-1.88694	2.52201		7.7	7.7638	-297.357		7.7	29.6343	-94.9463		7.7	304.648	-3059.2		7.7	11.922	-61.6894		7.7	16.6765	-87.4804
7.8	-1.26418	1.27649		7.8	13.9914	-296.734		7.8	30.2571	-97.4373		7.8	302.157	-3058.89		7.8	10.3651	-62.0007		7.8	12.6285	-87.7918
7.9	-3.13246	1.89925		7.9	13.68	-297.979		7.9	29.0116	-96.1918		7.9	304.648	-3061.38		7.9	9.43097	-62.9349		7.9	12.6285	-83.7438
8	-0.641419	1.27649		8	11.8117	-296.422		8	24.0295	-97.4373		8	308.696	-3060.45		8	6.93992	-64.8032		8	15.7423	-87.169
8.1	-0.0186577	0.0309696		8.1	10.2548	-297.979		8.1	26.8319	-99.617		8.1	308.696	-3062.32		8.1	10.3651	-62.0007		8.1	16.0537	-86.8577
8.2	-0.0186577	-1.21455		8.2	9.94346	-296.734		8.2	27.1433	-95.569		8.2	306.828	-3062.32		8.2	10.3651	-61.6894		8.2	14.4968	-88.7259
8.3	-1.26418	0.65373		8.3	13.3686	-297.668		8.3	29.3229	-96.8146		8.3	314.301	-3060.76		8.3	10.0537	-62.6235		8.3	14.1854	-86.2349
8.4	-0.641419	-1.83731		8.4	8.69794	-301.716		8.4	28.0774	-94.9463		8.4	305.583	-3059.51		8.4	9.74235	-66.3601		8.4	19.4789	-86.2349
8.5	0.604104	2.52201		8.5	7.7638	-295.8		8.5	32.7481	-96.5032		8.5	304.026	-3059.83		8.5	10.6765	-66.6715		8.5	19.4789	-83.7438
8.6	-4.37799	3.14478		8.6	11.8117	-297.045		8.6	27.766	-96.1918		8.6	307.139	-3058.27		8.6	10.6765	-63.2463		8.6	16.9879	-84.9894
8.7	0.604104	1.27649		8.7	9.94346	-294.554		8.7	29.0116	-98.0601		8.7	309.942	-3059.51		8.7	10.0537	-66.0487		8.7	12.9399	-89.6601
8.8	-1.26418	1.89925		8.8	9.63208	-294.865		8.8	29.0116	-97.1259		8.8	305.271	-3060.76		8.8	10.9879	-65.1146		8.8	12.9399	-84.3666
8.9	-2.5097	1.89925		8.9	6.2069	-297.979		8.9	31.1912	-98.0601		8.9	309.63	-3058.58		8.9	12.2334	-63.5576		8.9	12.3172	-86.8577
9	-0.641419	1.27649		9	9.94346	-296.734		9	26.5205	-96.5032		9	308.696	-3058.27		9	10.3651	-63.869		9	14.8082	-87.169
9.1	0.604104	0.65373		9.1	3.40447	-290.195		9.1	29.6343	-101.485		9.1	309.63	-3056.09		9.1	11.922	-63.869		9.1	17.922	-86.5463
9.2	0.604104	-0.591791		9.2	2.47033	-288.015		9.2	29.9457	-94.9463		9.2	306.517	-3057.65		9.2	10.0537	-65.4259		9.2	16.0537	-86.2349
9.3	-0.0186577	-0.591791		9.3	12.1231	-290.506		9.3	28.7002	-99.3056		9.3	305.583	-3060.14		9.3	11.6106	-63.869		9.3	9.51474	-85.9235
9.4	-0.641419	0.0309696		9.4	8.69794	-290.506		9.4	32.4368	-97.4373		9.4	305.271	-3058.58		9.4	8.80821	-62.9349		9.4	14.8082	-85.6121
9.5	-3.75523	2.52201		9.5	10.2548	-290.506		9.5	28.7002	-94.3235		9.5	308.696	-3056.71		9.5	11.2993	-62.0007		9.5	14.8082	-86.8577
9.6	-0.0186577	1058.73		9.6	9.3207	-295.8		9.6	27.4547	-98.0601		9.6	305.894	-3053.91		9.6	10.9879	-62.6235		9.6	13.5627	-86.2349
9.7	-0.0186577	-8164.99		9.7	12.7459	-295.488		9.7	26.5205	-99.617		9.7	301.535	-3057.96		9.7	10.9879	-65.1146		9.7	16.9879	-86.5463
9.8	-105.888	-806.445		9.8	18.0394	-296.111		9.8	32.4368	-96.8146		9.8	302.469	-3057.96		9.8	8.80821	-63.2463		9.8	14.4968	-87.169
9.9	1811.59	2145.44		9.9	14.9256	-292.997		9.9	34.6164	-97.1259		9.9	303.403	-3054.22		9.9	10.6765	-63.2463		9.9	12.0058	-88.7259
10	134.498	1579.98		10	16.1711	-294.554		10	30.5685	-94.9463		10	181.964	-3057.02		10	9.74235	-64.4918		10	13.2513	-87.169
10.1	-442.802	1180.16		10.1	7.7638	-295.488		10.1	29.3229	-96.1918		10.1	-653.781	-3057.02		10.1	9.43097	-62.6235		10.1	16.0537	-87.169
10.2	-312.645	884.352		10.2	4.02723	-1126.56		10.2	34.305	2782.21		10.2	-519.887	-2428.66		10.2	10.6765	44.18		10.2	14.4968	-85.6121
10.3	-226.704	661.403		10.3	49.4888	-2458.65		10.3	-908.244	8945.37		10.3	-162.111	2004.16		10.3	-10.186	277.716		10.3	-569.965	2534.34
10.4	-165.673	497.617		10.4	122.975	552.401		10.4	-2691.21	2048.29		10.4	-87.3798	1868.08		10.4	-54.4021	448.041		10.4	-1620.87	7069.6
10.5	-125.816	383.652		10.5	-28.9791	585.407		10.5	-452.071	321.37		10.5	-64.3376	367.853		10.5	-84.606	292.662		10.5	-682.684	2960.94
10.6	-95.9239	304.561		10.6	-32.0929	242.266		10.6	-46.3425	233.872		10.6	-52.1937	89.4783		10.6	-56.5817	202.984		10.6	-144.93	654.851
10.7	-74.1273	241.04		10.7	-14.3442	139.822		10.7	-45.7198	160.074		10.7	-40.0499	26.2681		10.7	-46.3062	157.523		10.7	-59.3004	252.236
10.8	-56.6899	201.183		10.8	-13.0987	94.983		10.8	-31.0849	122.709		10.8	-40.9841	-7.36096		10.8	-38.5216	132.924		10.8	-30.0306	156.331
10.9	-47.3485	165.685		10.9	-9.9849	72.875		10.9	-22.3662	103.715		10.9	-38.493	-11.4089		10.9	-34.7851	117.043		10.9	-22.5575	112.737
11	-40.4981	140.152		11	-11.5418	66.3361		11	-16.45	89.7024		11	-34.4451	-12.3431		11	-31.0485	101.163		11	-21.3119	87.2041
11.1	-31.7795	123.96		11.1	-10.2963	59.1743		11.1	-14.5817	80.9838		11.1	-30.0857	-20.1276		11.1	-30.1144	98.6716		11.1	-16.6412	74.1261
11.2	-29.2884	112.128		11.2	-5.62557	57.9288		11.2	-12.4021	68.8399		11.2	-22.924	-22.3073		11.2	-25.4437	114.241		11.2	-16.6412	67.2758
11.3	-24.9291	98.4272		11.3	0.602045	46.0963		11.3	-9.91101	56.6961		11.3	-24.1696	-23.2415		11.3	-24.1981	108.324		11.3	-12.5933	57.623
11.4	-23.0608	89.7086		11.4	-5.62557	45.7849		11.4	-7.10859	57.9416		11.4	-25.1036	-22.6187		11.4	-31.6713	114.863		11.4	-11.0364	46.7246
11.5	-21.8153	87.2175		11.5	-6.24833	42.9825		11.5	-6.79721	48.6002		11.5	-24.7922	-25.1097		11.5	-22.6412	109.259		11.5	-6.67706	44.2336
11.6	-19.947	81.6127		11.6	-6.87109	39.5573		11.6	-2.43788	37.3905		11.6	-23.2354	-21.6846		11.6	-19.216	109.259		11.6	-8.23396	38.9401
11.7	-18.7015	76.6306		11.7	-8.42799	33.9525		11.7	-1.50374	37.7019		11.7	-22.3013	-14.2114		11.7	-15.1681	103.965		11.7	-9.79086	35.5149
11.8	-16.2104	74.7623		11.8	-3.75728	33.6411		11.8	-2.74926	36.145		11.8	-18.2533	-19.5049		11.8	-19.216	98.0489		11.8	-12.2819	33.6467
11.9	-17.456	67.2892		11.9	-10.2963	35.198		11.9	-1.81512	33.3425		11.9	-19.1874	-14.8341		11.9	-18.5933	93.0668		11.9	-6.98844	31.1556
12	-15.5877	70.403		12	-13.0987	28.9703		12	-2.43788	29.2946		12	-19.8102	-21.6846		12	-17.9705	86.8392		12	-11.0364	23.6825
12.1	-15.5877	66.0437		12.1	-11.5418	25.8566		12.1	-0.880974	26.1808		12.1	-20.433	-23.8641		12.1	-15.1681	86.2164		12.1	-8.54534	24.3052
12.2	-16.2104	62.9299		12.2	-8.73937	28.9703		12.2	-0.569595	26.4922		12.2	-18.5647	-22.3073		12.2	-12.3657	91.1985		12.2	-11.0364	24.3052
12.3	-16.2104	62.9299		12.3	-7.80523	26.168		12.3	-1.19236	21.1987		12.3	-17.3191	-18.8821		12.3	-13.6112	79.9888		12.3	-10.725	18.389
12.4	-14.9649	64.1754		12.4	-5.62557	26.4793		12.4	-0.258217	22.4442		12.4	-18.8761	-7.67236		12.4	-13.9226	68.4677		12.4	-1.69497	26.7963
12.5	-15.5877	60.4388		12.5	-8.73937	24.2997		12.5	5.34664	20.8873		12.5	-18.8761	-1.1333		12.5	-14.8567	53.5215		12.5	-11.0364	19.9459
12.6	-12.4739	59.1933		12.6	-8.73937	27.1021		12.6	4.10111	14.9711		12.6	-17.6305	2.29175		12.6	-13.6112	63.4856		12.6	-10.725	10.2931
12.7	-12.4739	59.816		12.7	-9.9849	22.4314		12.7	0.364548	14.3483		12.7	-16.6964	0.423584		12.7	-16.1022	70.0246		12.7	-2.00635	20.5687
12.8	-14.9649	57.9478		12.8	-5.62557	17.7607		12.8	3.16697	15.2825		12.8	-17.3191	0.112061		12.8	-13.2998	68.4677		12.8	-1.69497	20.8801
12.9	-13.7194	55.4567		12.9	-9.05076	20.8745		12.9	4.41249	10.9231		12.9	-12.6484	13.1902		12.9	-12.6771	69.4019		12.9	-6.98844	12.7841
13	-12.4739	54.834		13	-6.87109	19.9403		13	1.92145	14.037		13	-10.1573	14.4355		13	-7.0722	72.8271		13	-7.6112	14.9638
13.1	-11.8511	56.0795		13.1	-12.7873	22.12		13.1	1.92145	10.9231		13.1	-9.22327	13.813		13.1	-8.62911	76.5636		13.1	-3.56325	14.6524
13.2	-15.5877	55.4567		13.2	-7.49385	17.4493		13.2	4.41249	14.6597		13.2	-10.4688	19.1064		13.2	-13.2998	71.8929		13.2	-5.12015	10.6045
13.3	-13.0966	57.325		13.3	-2.51176	19.9403		13.3	4.10111	6.87518		13.3	-6.1095	15.6812		13.3	-10.4974	72.2043		13.3	-0.760824	10.6045
13.4	-9.98284	56.0795		13.4	-5.31418	17.4493		13.4	5.9694	7.18658		13.4	-5.7981	20.6633		13.4	-8.62911	71.8929		13.4	0.484699	15.5866
13.5	-8.73732	51.7202		13.5	-4.06866	18.072		13.5	2.23283	9.67761		13.5	-3.92981	21.5974		13.5	-4.58116	59.7491		13.5	-9.1681	9.04759
13.6	-11.2284	51.7202		13.6	-3.44591	21.1859		13.6	3.47835	5.94106		13.6	-3.92981	20.9746		13.6	-4.58116	56.3239		13.6	-19.1323	-1.85074
13.7	-10.6056	50.4746		13.7	-3.75728	20.5631		13.7	1.29869	7.49796		13.7	-4.86389	24.0884		13.7	-9.87463	62.5515		13.7	-14.4616	-0.916595
13.8	-8.73732	51.7202		13.8	-5.00281	23.0541		13.8	3.16697	6.56381		13.8	-0.504639	19.1064		13.8	-7.0722	68.1564		13.8	-17.5754	-0.916595
13.9	-10.6056	49.8519		13.9	-2.82314	18.6948		13.9	2.54421	4.07277		13.9	-4.55249	20.0405		13.9	-7.0722	60.9946		13.9	-11.0364	0.640305
14	-9.36008	50.4746		14	-2.20038	15.8924		14	0.987305	7.49796		14	-1.12732	23.1543		14	-5.5153	29.2338		14	-4.80877	0.0175476
14.1	-9.36008	50.4746		14.1	-0.332098	15.2696		14.1	5.03526	4.38416		14.1	-9.22327	30.0046		14.1	-10.186	17.7127		14.1	-5.43153	4.37688
14.2	-9.36008	51.0974		14.2	-2.20038	15.8924		14.2	4.10111	4.38416		14.2	-18.5647	28.4478		14.2	-11.7429	13.9761		14.2	-14.4616	3.13136
14.3	-9.36008	51.7202		14.3	1.53619	14.6469		14.3	6.90354	0.336212		14.3	-37.2476	26.5796		14.3	-8.00635	13.9761		14.3	-10.725	4.37688
14.4	-7.49179	48.6063		14.4	-1.26624	13.7127		14.4	3.16697	2.82724		14.4	-66.8286	31.873		14.4	-11.7429	15.533		14.4	-0.138062	10.6045
14.5	-7.49179	47.3608		14.5	1.22481	13.09		14.5	4.41249	1.58173		14.5	-113.847	43.394		14.5	-10.186	14.9103		14.5	2.97574	11.2272
14.6	-8.11455	46.7381		14.6	-7.18247	11.8444		14.6	4.10111	4.07277		14.6	-163.668	59.2744		14.6	-11.4315	14.2875		14.6	0.173319	7.80206
14.7	-9.36008	48.6063		14.7	-7.80523	15.8924		14.7	5.65802	1.27034		14.7	-208.195	62.6997		14.7	-11.4315	14.2875		14.7	3.28712	13.4069
14.8	-6.86903	47.3608		14.8	-2.82314	16.5151		14.8	4.10111	3.45001		14.8	-256.771	74.532		14.8	-14.234	12.7306		14.8	9.20336	10.9159
14.9	-8.11455	45.4925		14.9	-9.36213	19.9403		14.9	2.85559	1.27034		14.9	-293.514	89.167		14.9	-16.4136	12.4192		14.9	2.66436	15.2752
15	-9.36008	44.247		15	-5.00281	19.9403		15	2.85559	0.958954		15	-332.125	106.916		15	-11.4315	15.8444		15	-0.760824	14.6524
15.1	-8.11455	47.9836		15.1	-0.954855	20.5631		15.1	2.23283	1.27034		15.1	-368.245	125.91		15.1	-11.7429	14.5989		15.1	-28.4737	14.341
15.2	-12.4739	46.1153		15.2	-0.954855	21.4972		15.2	2.54421	-0.28656		15.2	-401.251	134.006		15.2	-11.7429	13.042		15.2	-102.271	24.6166
15.3	-10.6056	48.6063		15.3	-0.954855	16.2037		15.3	1.61007	-1.84346		15.3	-430.521	151.754		15.3	-9.56325	12.1078		15.3	-237.41	53.575
15.4	-10.6056	48.6063		15.4	0.290667	16.2037		15.4	1.61007	-0.909332		15.4	-452.318	158.605		15.4	-12.0543	12.1078		15.4	-442.61	127.372
15.5	-13.0966	44.8698		15.5	-1.26624	16.2037		15.5	4.41249	-0.28656		15.5	-472.246	163.587		15.5	-12.3657	12.7306		15.5	-718.805	250.056
15.6	-15.5877	47.3608		15.6	1.53619	10.9103		15.6	3.16697	-4.64589		15.6	-485.324	187.563		15.6	-6.44944	14.5989		15.6	-1112.39	391.423
15.7	-14.9649	47.9836		15.7	-3.44591	9.97614		15.7	4.10111	-1.53207		15.7	-489.995	203.132		15.7	-7.0722	13.6647		15.7	-1581.64	592.263
15.8	-16.2104	46.7381		15.8	-2.51176	12.1558		15.8	2.85559	-0.597931		15.8	-495.6	204.689		15.8	-5.5153	11.7965		15.8	-2044.04	833.895
15.9	-18.7015	45.4925		15.9	2.78171	1.56885		15.9	3.47835	-2.15485		15.9	-500.582	214.653		15.9	-6.13806	15.2216		15.9	-2465.65	1069.61
16	-20.5698	46.1153		16	-0.954855	1.25751		16	-0.258217	-5.58003		16	-499.336	222.438		16	-9.56325	8.68266		16	-2858.92	1334.91
16.1	-23.6836	46.1153		16.1	-1.889	5.30542		16.1	-2.1265	-4.64589		16.1	-497.468	234.27		16.1	-9.25187	7.12575		16.1	-3258.74	1598.33
16.2	-28.6657	45.4925		16.2	-3.13452	9.04199		16.2	0.0531693	-1.84346		16.2	-502.762	242.366		16.2	-10.8088	8.99404		16.2	-3641.42	1845.57
16.3	-38.6299	44.247		16.3	-2.20038	6.23956		16.3	-8.04273	2.51587		16.3	-503.696	252.953		16.3	-7.69497	6.50299		16.3	-3982.38	2105.57
16.4	-43.6119	44.247		16.4	0.290667	5.30542		16.4	-24.2345	0.958954		16.4	-513.66	260.115		16.4	-6.13806	5.25747		16.4	-4312.45	2332.88
16.5	-55.4444	46.1153		16.5	-3.13452	7.17371		16.5	-63.1571	1.8931		16.5	-514.905	261.049		16.5	-6.13806	5.25747		16.5	-4644.38	2541.51
16.6	-61.672	46.1153		16.6	0.913424	6.8623		16.6	-132.595	6.87518		16.6	-511.169	271.325		16.6	-6.13806	5.56885		16.6	-4938.01	2711.83
16.7	-70.3907	45.4925		16.7	-0.332098	7.17371		16.7	-249.985	14.3483		16.7	-506.809	277.241		16.7	-6.13806	8.05989		16.7	-5179.33	2856.62
16.8	-81.6004	46.1153		16.8	-2.82314	7.79651		16.8	-398.825	31.4743		16.8	-506.809	283.157		16.8	-5.5153	12.1078		16.8	-5368.65	3012.31
16.9	-94.6784	43.0015		16.9	-1.889	9.97614		16.9	-578.803	54.8278		16.9	-504.007	289.696		16.9	-4.58116	7.43713		16.9	-5538.04	3162.71
17	-107.756	44.8698		17	1.53619	1.88025		17	-778.087	92.5049		17	-493.731	290.008		17	-4.58116	4.01194		17	-5713.66	3285.71
17.1	-116.475	41.1332		17.1	2.47033	2.50299		17.1	-977.371	141.08		17.1	-492.797	283.469		17.1	-5.5153	5.88023		17.1	-5883.36	3391.26
17.2	-124.571	42.3787		17.2	-0.954855	0.634705		17.2	-1149.56	198.374		17.2	-484.701	282.846		17.2	-2.09011	4.32333		17.2	-6027.22	3493.71
17.3	-136.403	43.0015		17.3	-1.889	1.88025		17.3	-1303.7	261.585		17.3	-481.899	283.469		17.3	-1.77873	6.50299		17.3	-6148.66	3571.86
17.4	-147.613	42.3787		17.4	-1.889	1.56885		17.4	-1489.9	361.849		17.4	-476.294	283.78		17.4	-3.64702	5.56885		17.4	-6249.24	3626.04
17.5	-155.086	45.4925		17.5	-0.332098	-1.23358		17.5	-1656.18	430.976		17.5	-461.659	289.696		17.5	-4.58116	4.63471		17.5	-6350.43	3697.04
17.6	-161.314	44.247		17.6	-3.44591	6.23956		17.6	-1781.36	500.414		17.6	-443.288	294.055		17.6	-3.9584	4.63471		17.6	-6433.26	3794.5
17.7	-164.428	44.247		17.7	-1.889	2.19165		17.7	-1940.78	593.205		17.7	-431.144	289.385		17.7	-4.58116	4.63471		17.7	-6528.23	3857.71
17.8	-166.919	46.1153		17.8	-5.31418	0.634705		17.8	-2087.13	672.607		17.8	-424.605	292.187		17.8	-5.20392	6.50299		17.8	-6605.14	3906.91
17.9	-174.392	45.4925		17.9	-4.69143	1.88025		17.9	-2210.13	772.872		17.9	-417.132	281.912		17.9	-12.3657	4.32333		17.9	-6653.41	3955.17
18	-179.997	44.8698		18	1.84757	2.19165		18	-2312.57	856.633		18	-417.132	272.882		18	-7.38358	4.01194		18	-6744.02	4009.04
18.1	-180.619	46.1153		18.1	-0.332098	4.99402		18.1	-2424.36	915.795		18.1	-419	274.127		18.1	-6.13806	4.63471		18.1	-6815.95	4027.41
18.2	-179.997	47.3608		18.2	1.53619	6.55096		18.2	-2528.67	989.592		18.2	-412.461	284.091		18.2	-5.20392	3.0778		18.2	-6861.1	4040.49
18.3	-179.997	46.1153		18.3	-5.62557	1.88025		18.3	-2598.73	1083.32		18.3	-393.156	279.732		18.3	-2.40149	3.70057		18.3	-6895.35	4089.07
18.4	-179.374	45.4925		18.4	-6.87109	-2.79047		18.4	-2670.97	1155.25		18.4	-387.551	289.385		18.4	-3.9584	2.14366		18.4	-6913.1	4163.18
18.5	-181.865	48.6063		18.5	-4.06866	-3.72461		18.5	-2739.47	1226.86		18.5	-384.125	290.319		18.5	-1.77873	0.586758		18.5	-6909.36	4217.36
18.6	-180.619	47.3608		18.6	-4.69143	-4.65875		18.6	-2769.05	1292.57		18.6	-377.898	274.75		18.6	-3.9584	1.83228		18.6	-6920.88	4243.2
18.7	-178.751	46.7381		18.7	-3.44591	2.81439		18.7	-2806.11	1356.09		18.7	-378.209	273.504		18.7	-1.77873	3.0778		18.7	-6931.16	4239.78
18.8	-177.506	45.4925		18.8	-3.75728	0.323364		18.8	-2820.43	1425.21		18.8	-375.718	263.852		18.8	-1.46735	-0.347382		18.8	-6922.75	4259.39
18.9	-179.374	42.3787		18.9	0.290667	-0.299438		18.9	-2836	1494.34		18.9	-371.359	251.085		18.9	0.712311	3.38918		18.9	-6935.83	4270.29
19	-179.997	41.1332		19	0.602045	4.37128		19	-2875.24	1530.77		19	-362.64	251.085		19	-0.533211	3.70057		19	-6956.69	4294.89
19.1	-175.015	42.3787		19.1	1.22481	6.23956		19.1	-2908.24	1561.91		19.1	-363.263	251.085		19.1	-0.533211	3.0778		19.1	-6947.35	4313.26
19.2	-171.901	44.247		19.2	0.290667	5.30542		19.2	-2910.11	1597.72		19.2	-353.61	257.624		19.2	-3.64702	1.5209		19.2	-6925.24	4320.11
19.3	-172.524	44.8698		19.3	-4.69143	7.17371		19.3	-2902.64	1652.83		19.3	-345.826	266.965		19.3	-3.64702	-0.0360031		19.3	-6943.93	4315.75
19.4	-169.41	44.247		19.4	-2.20038	6.23956		19.4	-2917.27	1695.49		19.4	-337.73	255.756		19.4	-1.46735	-0.970142		19.4	-6942.06	4312.02
19.5	-164.428	46.1153		19.5	1.84757	5.30542		19.5	-2935.02	1701.72		19.5	-325.586	251.085		19.5	-1.46735	0.586758		19.5	-6932.4	4341.29
19.6	-156.954	46.7381		19.6	2.47033	6.55096		19.6	-2928.79	1696.74		19.6	-322.161	242.366		19.6	-4.26978	0.275379		19.6	-6922.44	4345.65
19.7	-152.595	46.7381		19.7	-0.0207195	10.5989		19.7	-2907.62	1711.06		19.7	-322.161	230.534		19.7	-3.64702	-1.28152		19.7	-6900.33	4350.32
19.8	-146.368	45.4925		19.8	1.22481	2.19165		19.8	-2911.98	1722.58		19.8	-310.951	240.498		19.8	-0.844591	-0.347382		19.8	-6878.54	4335.37
19.9	-143.254	41.756		19.9	-3.44591	6.8623		19.9	-2915.09	1734.73		19.9	-299.119	249.839		19.9	2.26921	-0.347382		19.9	-6872.93	4298
20	-145.745	39.2649		20	-5.00281	4.68268		20	-2892.36	1728.81		20	-298.807	255.444		20	0.08955	-0.0360031		20	-6856.74	4289.29
20.1	-143.877	40.5105		20.1	-1.889	6.55096		20.1	-2878.35	1713.86		20.1	-290.089	243.3		20.1	-2.71288	4.01194		20.1	-6825.29	4268.11
20.2	-142.008	39.8877		20.2	3.09309	6.23956		20.2	-2868.7	1728.19		20.2	-288.532	223.061		20.2	-1.46735	0.275379		20.2	-6804.12	4270.29
20.3	-140.14	41.1332		20.3	4.02723	8.10785		20.3	-2859.67	1731.92		20.3	-283.238	218.079		20.3	0.712311	-2.52705		20.3	-6821.55	4276.21
20.4	-134.535	45.4925		20.4	3.40447	12.1558		20.4	-2826.97	1763.37		20.4	-286.975	220.258		20.4	3.82612	-1.59291		20.4	-6822.49	4275.58
20.5	-135.781	43.6243		20.5	2.78171	12.7786		20.5	-2807.67	1760.57		20.5	-283.238	214.031		20.5	-3.02426	-1.28152		20.5	-6798.51	4247.87
20.6	-133.29	43.6243		20.6	8.69794	16.8265		20.6	-2798.32	1776.76		20.6	-278.568	207.18		20.6	-1.15597	-1.28152		20.6	-6760.21	4260.02
20.7	-129.553	43.0015		20.7	5.27275	14.0241		20.7	-2769.99	1760.88		20.7	-267.669	206.557		20.7	-1.46735	-1.90429		20.7	-6745.58	4264.69
20.8	-126.439	41.756		20.8	5.89552	14.6469		20.8	-2746.95	1764.62		20.8	-260.196	206.557		20.8	-2.09011	-0.970142		20.8	-6740.28	4234.48
20.9	-128.93	41.756		20.9	5.89552	10.5989		20.9	-2722.97	1767.11		20.9	-252.723	209.049		20.9	-1.77873	-3.77257		20.9	-6711.01	4215.8
21	-128.93	36.7739		21	1.84757	8.73059		21	-2711.76	1754.97		21	-252.411	215.276		21	-0.533211	-2.83843		21	-6686.73	4204.9
21.1	-127.685	39.2649		21.1	-0.332098	0.323364		21.1	-2697.75	1762.75		21.1	-249.92	219.013		21.1	-3.9584	-2.21567		21.1	-6678.94	4179.06
21.2	-125.194	38.6422		21.2	-0.0207195	2.19165		21.2	-2670.35	1720.4		21.2	-257.082	200.641		21.2	-0.533211	-2.83843		21.2	-6662.13	4185.6
21.3	-121.457	39.8877		21.3	0.602045	0.323364		21.3	-2633.29	1724.14		21.3	-252.1	183.827		21.3	-0.844591	-2.52705		21.3	-6642.82	4226.08
21.4	-115.852	40.5105		21.4	0.290667	2.81439		21.4	-2627.69	1749.67		21.4	-243.693	181.336		21.4	0.40093	-2.52705		21.4	-6643.44	4252.85
21.5	-117.098	42.3787		21.5	-0.643476	6.55096		21.5	-2600.6	1749.67		21.5	-234.663	188.497		21.5	0.712311	-3.46119		21.5	-6616.98	4223.9
21.6	-118.343	42.3787		21.6	3.71585	1.25751		21.6	-2576.62	1738.15		21.6	-237.465	199.707		21.6	-1.46735	-4.70671		21.6	-6569.96	4197.74
21.7	-115.229	40.5105		21.7	3.71585	4.37128		21.7	-2563.54	1706.39		21.7	-234.351	201.264		21.7	-1.46735	-5.01809		21.7	-6517.02	4197.43
21.8	-117.721	39.8877		21.8	4.96137	2.19165		21.8	-2524.31	1705.77		21.8	-235.286	190.054		21.8	-0.22183	-2.21567		21.8	-6511.42	4207.7
21.9	-120.212	37.3966		21.9	5.27275	-5.28149		21.9	-2501.27	1673.7		21.9	-228.124	184.761		21.9	0.08955	-4.08395		21.9	-6503.63	4213
22	-118.966	36.7739		22	8.07518	-3.41321		22	-2488.5	1648.47		22	-226.567	172.617		22	-2.40149	-2.83843		22	-6485.26	4195.87
22.1	-120.212	35.5284		22.1	1.22481	0.634705		22.1	-2483.83	1676.19		22.1	-226.567	169.192		22.1	0.08955	-6.26361		22.1	-6484.95	4204.28
22.2	-119.589	35.5284		22.2	-0.643476	-2.79047		22.2	-2469.2	1672.45		22.2	-220.339	176.354		22.2	1.95783	-7.19776		22.2	-6471.25	4215.18
22.3	-118.343	38.0194		22.3	-4.06866	-8.08392		22.3	-2438.99	1660.93		22.3	-217.537	181.958		22.3	2.26921	-5.95224		22.3	-6450.08	4211.75
22.4	-115.852	39.8877		22.4	-6.87109	-6.52704		22.4	-2415.64	1640.07		22.4	-209.441	179.156		22.4	1.02369	-3.46119		22.4	-6433.88	4200.54
22.5	-109.625	41.1332		22.5	-5.00281	-0.610779		22.5	-2399.45	1619.52		22.5	-204.459	176.976		22.5	2.26921	-3.46119		22.5	-6410.53	4185.6
22.6	-100.906	39.8877		22.6	0.602045	2.50299		22.6	-2376.72	1626.05		22.6	-208.195	173.863		22.6	2.89198	-4.08395		22.6	-6401.5	4161.93
22.7	-95.9239	38.6422		22.7	-1.57762	1.56885		22.7	-2376.72	1643.18		22.7	-211.309	173.24		22.7	3.20336	-7.19776		22.7	-6361.64	4158.19
22.8	-88.4508	36.1511		22.8	-1.26624	0.323364		22.8	-2367.37	1634.46		22.8	-209.441	177.599		22.8	3.20336	-5.64085		22.8	-6363.51	4148.54
22.9	-85.9597	38.0194		22.9	-1.889	-2.47906		22.9	-2351.49	1632.28		22.9	-204.459	180.402		22.9	2.89198	-6.26361		22.9	-6351.68	4133.28
23	-82.2231	39.2649		23	2.47033	-1.85632		23	-2327.83	1622.32		23	-200.1	176.354		23	-1.77873	-7.19776		23	-6319.3	4115.85
23.1	-82.2231	35.5284		23.1	-0.0207195	-2.16772		23.1	-2304.47	1613.91		23.1	-198.231	175.731		23.1	-1.15597	-7.50914		23.1	-6288.16	4112.73
23.2	-84.7142	36.7739		23.2	-4.69143	-4.65875		23.2	-2291.09	1593.36		23.2	-201.345	175.108		23.2	1.02369	-7.50914		23.2	-6262.31	4143.87
23.3	-81.6004	38.0194		23.3	3.40447	-4.03601		23.3	-2284.86	1574.99		23.3	-197.92	183.515		23.3	-1.77873	-3.46119		23.3	-6224.95	4151.03
23.4	-84.7142	37.3966		23.4	-0.332098	-4.03601		23.4	-2279.88	1599.9		23.4	-189.201	180.713		23.4	-0.22183	-3.46119		23.4	-6212.8	4122.7
23.5	-82.8459	38.6422		23.5	-0.332098	-3.10181		23.5	-2275.83	1619.2		23.5	-186.399	173.551		23.5	-2.71288	-5.01809		23.5	-6202.84	4092.8
23.6	-82.2231	39.2649		23.6	6.82966	-4.65875		23.6	-2266.18	1621.38		23.6	-173.009	167.635		23.6	0.40093	-1.28152		23.6	-6212.8	4079.73
23.7	-77.2411	40.5105		23.7	3.09309	-8.39532		23.7	-2236.59	1604.57		23.7	-168.027	165.455		23.7	1.95783	-2.52705		23.7	-6214.05	4082.22
23.8	-76.6183	40.5105		23.8	-0.954855	-4.34735		23.8	-2207.95	1610.49		23.8	-170.518	176.976		23.8	1.95783	-7.50914		23.8	-6183.53	4095.61
23.9	-75.9955	36.7739		23.9	2.47033	3.12573		23.9	-2194.56	1589		23.9	-165.536	190.366		23.9	4.44888	-6.26361		23.9	-6172.32	4084.4
24	-75.3728	35.5284		24	-0.332098	2.19165		24	-2195.49	1573.74		24	-165.225	186.006		24	3.82612	-6.26361		24	-6170.46	4052.32
24.1	-78.4866	34.2828		24.1	4.65	0.634705		24.1	-2188.02	1553.5		24.1	-163.357	185.384		24.1	1.02369	-9.6888		24.1	-6159.56	4055.13
24.2	-75.9955	34.9056		24.2	1.53619	0.0119629		24.2	-2192.38	1560.04		24.2	-158.375	177.599		24.2	2.89198	-10.0002		24.2	-6133.71	4042.05
24.3	-75.9955	36.7739		24.3	3.71585	0.0119629		24.3	-2190.82	1546.03		24.3	-159.932	180.713		24.3	-3.33564	-9.37742		24.3	-6108.49	4053.57
24.4	-75.9955	34.9056		24.4	3.09309	-3.72461		24.4	-2170.27	1522.99		24.4	-154.327	179.779		24.4	2.5806	-8.1319		24.4	-6086.38	4036.44
24.5	-76.6183	39.8877		24.5	4.96137	-5.5929		24.5	-2141.62	1530.46		24.5	-149.967	178.844		24.5	6.00578	-8.44328		24.5	-6065.21	4021.81
24.6	-74.1273	38.6422		24.6	4.33861	-9.01807		24.6	-2112.98	1518.94		24.6	-151.524	164.21		24.6	0.40093	-9.6888		24.6	-6039.37	4028.66
24.7	-69.7679	39.2649		24.7	4.96137	-4.65875		24.7	-2101.77	1521.43		24.7	-148.41	163.276		24.7	0.40093	-4.70671		24.7	-6017.26	4048.9
24.8	-66.6541	39.2649		24.8	4.33861	0.323364		24.8	-2085.26	1504.3		24.8	-154.015	168.569		24.8	-1.46735	13.042		24.8	-5995.46	4021.81
24.9	-69.1452	36.1511		24.9	1.22481	-6.83838		24.9	-2054.12	1494.34		24.9	-149.344	175.731		24.9	-4.58116	38.8866		24.9	-5984.56	3993.79
25	-69.1452	37.3966		25	1.22481	-6.52704		25	-2030.77	1518.32		25	-143.74	182.27		25	-13.6112	94.3123		25	-5993.28	4007.49
25.1	-72.8817	31.169		25.1	-1.57762	-9.01807		25.1	-2007.42	1529.84		25.1	-140.314	182.581		25.1	-45.6834	189.283		25.1	-5991.72	4010.29
25.2	-72.259	32.4146		25.2	-1.889	-7.77258		25.2	-2002.75	1502.44		25.2	-143.117	168.88		25.2	-103.6	342.171		25.2	-5989.86	3990.05
25.3	-71.0134	35.5284		25.3	-4.69143	-10.575		25.3	-1989.67	1480.33		25.3	-144.362	156.737		25.3	-202.619	550.796		25.3	-5963.08	4005.62
25.4	-72.259	34.9056		25.4	-4.69143	-7.46118		25.4	-1990.29	1443.27		25.4	-149.656	154.868		25.4	-326.237	784.955		25.4	-5944.71	4018.7
25.5	-71.6362	37.3966		25.5	-3.13452	-1.54492		25.5	-1964.14	1451.99		25.5	-138.446	150.509		25.5	-490.958	1019.11		25.5	-5939.41	4008.11
25.6	-71.6362	38.6422		25.6	-4.69143	-2.79047		25.6	-1932.69	1425.84		25.6	-135.644	154.868		25.6	-736.948	1297.49		25.6	-5923.53	4003.44
25.7	-68.5224	35.5284		25.7	-9.36213	-7.14978		25.7	-1911.51	1414.94		25.7	-132.841	170.749		25.7	-1011.59	1595.79		25.7	-5906.09	3982.26
25.8	-67.2769	36.7739		25.8	-5.62557	-6.21564		25.8	-1899.37	1394.39		25.8	-131.907	173.24		25.8	-1223.01	1871.98		25.8	-5904.23	3982.26
25.9	-66.0314	34.2828		25.9	-2.20038	-4.03601		25.9	-1882.24	1406.53		25.9	-131.596	170.749		25.9	-1403.93	2101.78		25.9	-5890.21	3972.61
26	-66.0314	31.7918		26	3.40447	-4.65875		26	-1889.09	1415.87		26	-131.907	167.012		26	-1574.56	2339.99		26	-5872.15	3971.68
26.1	-67.8996	32.4146		26.1	0.602045	-5.5929		26.1	-1876.64	1409.02		26.1	-133.153	163.587		26.1	-1740.53	2526.2		26.1	-5846.93	3954.24
26.2	-66.6541	31.169		26.2	-0.954855	-12.1319		26.2	-1868.23	1365.74		26.2	-130.039	166.701		26.2	-1887.81	2685.31		26.2	-5820.46	3935.87
26.3	-66.6541	32.4146		26.3	-4.06866	-16.1798		26.3	-1872.59	1353.6		26.3	-130.35	170.749		26.3	-2017.03	2841.31		26.3	-5798.67	3946.46
26.4	-69.1452	35.5284		26.4	-5.93695	-16.8026		26.4	-1864.81	1357.33		26.4	-127.548	172.617		26.4	-2126.64	2866.85		26.4	-5797.11	3957.04
26.5	-64.7858	34.9056		26.5	-5.31418	-10.2636		26.5	-1857.33	1367.92		26.5	-135.332	161.096		26.5	-2194.52	2932.55		26.5	-5776.87	3949.88
26.6	-67.2769	36.1511		26.6	-8.73937	-12.7546		26.6	-1832.11	1369.79		26.6	-136.889	156.425		26.6	-2263.34	3017.55		26.6	-5765.04	3924.66
26.7	-66.6541	35.5284		26.7	-3.44591	-14.6229		26.7	-1819.03	1337.72		26.7	-133.776	160.473		26.7	-2304.75	3081.7		26.7	-5740.13	3907.84
26.8	-66.6541	34.9056		26.8	-1.889	-15.2457		26.8	-1824.95	1353.29		26.8	-131.284	154.868		26.8	-2341.18	3110.66		26.8	-5702.14	3904.11
26.9	-69.1452	34.2828		26.9	-1.57762	-12.4432		26.9	-1817.48	1358.27		26.9	-131.907	155.491		26.9	-2367.96	3087.61		26.9	-5674.43	3900.37
27	-66.6541	32.4146		27	-3.13452	-5.9043		27	-1792.57	1341.14		27	-134.398	151.132		27	-2381.66	3115.64		27	-5675.67	3909.09
27.1	-67.8996	33.0373		27.1	-4.06866	-5.28149		27.1	-1781.67	1332.42		27.1	-130.662	156.737		27.1	-2370.45	3146.15		27.1	-5682.52	3884.8
27.2	-66.6541	31.7918		27.2	-5.00281	-7.77258		27.2	-1793.19	1340.83		27.2	-126.614	154.868		27.2	-2356.44	3139.93		27.2	-5675.67	3884.49
27.3	-69.1452	32.4146		27.3	-5.93695	-5.28149		27.3	-1783.22	1346.75		27.3	-130.35	160.473		27.3	-2338.69	3130.27		27.3	-5668.2	3885.74
27.4	-67.8996	34.2828		27.4	-6.55971	-8.70667		27.4	-1758.94	1342.7		27.4	-138.135	176.665		27.4	-2318.14	3086.99		27.4	-5636.13	3880.75
27.5	-66.0314	34.9056		27.5	-8.42799	-8.08392		27.5	-1745.55	1310.94		27.5	-124.745	170.749		27.5	-2280.15	3045.27		27.5	-5622.43	3867.36
27.6	-66.0314	34.2828		27.6	-5.00281	-4.03601		27.6	-1742.74	1304.4		27.6	-112.913	162.341		27.6	-2169.3	3031.57		27.6	-5613.08	3866.12
27.7	-64.1631	34.2828		27.7	-5.93695	-8.08392		27.7	-1740.88	1330.55		27.7	-111.979	159.228		27.7	-2101.42	3042.15		27.7	-5615.26	3851.17
27.8	-62.2948	35.5284		27.8	-3.13452	-12.1319		27.8	-1742.74	1322.77		27.8	-107.62	160.162		27.8	-2092.39	3001.67		27.8	-5602.19	3844.01
27.9	-62.2948	34.2828		27.9	0.290667	-12.4432		27.9	-1732.16	1317.48		27.9	-111.979	169.503		27.9	-2053.47	2945		27.9	-5585.68	3836.85
28	-65.4086	34.2828		28	-3.13452	-12.1319		28	-1723.75	1299.73		28	-107.62	172.617		28	-1986.52	2882.41		28	-5565.76	3826.57
28.1	-68.5224	31.7918		28.1	-5.31418	-14.0002		28.1	-1701.02	1298.48		28.1	-110.733	174.797		28.1	-1959.43	2827.61		28.1	-5556.1	3821.9
28.2	-69.7679	33.0373		28.2	-5.31418	-9.64087		28.2	-1695.1	1298.48		28.2	-114.159	156.737		28.2	-1929.22	2779.04		28.2	-5551.43	3823.77
28.3	-69.1452	32.4146		28.3	-8.73937	-4.97009		28.3	-1678.29	1294.43		28.3	-111.356	162.653		28.3	-1897.46	2781.53		28.3	-5545.52	3823.15
28.4	-69.7679	33.6601		28.4	-4.38005	-6.52704		28.4	-1680.47	1289.76		28.4	-114.781	179.156		28.4	-1877.54	2762.84		28.4	-5557.66	3825.33
28.5	-62.2948	35.5284		28.5	-2.20038	-0.610779		28.5	-1684.52	1292.88		28.5	-103.883	180.09		28.5	-1883.45	2719.56		28.5	-5554.55	3805.09
28.6	-63.5403	34.9056		28.6	-0.332098	1.25751		28.6	-1660.23	1316.85		28.6	-98.9009	177.599		28.6	-1883.14	2679.08		28.6	-5519.36	3791.08
28.7	-65.4086	36.7739		28.7	1.22481	-3.10181		28.7	-1654.62	1291.94		28.7	-98.5895	164.21		28.7	-1825.85	2645.14		28.7	-5516.25	3778.62
28.8	-61.0493	32.4146		28.8	-0.954855	-4.34735		28.8	-1659.92	1283.54		28.8	-97.9667	166.389		28.8	-1742.09	2588.16		28.8	-5513.75	3782.67
28.9	-59.8037	31.169		28.9	-10.6077	12.1558		28.9	-1627.53	1261.43		28.9	-102.949	166.389		28.9	-1709.7	2529		28.9	-5490.71	3798.24
29	-61.0493	34.2828		29	-4.69143	33.3297		29	-1637.81	1217.83		29	-97.344	163.587		29	-1698.49	2485.72		29	-5470.47	3787.65
29.1	-56.6899	31.169		29.1	-10.919	61.3539		29.1	-1643.41	1211.92		29.1	-95.4757	175.419		29.1	-1648.98	2463.92		29.1	-5464.56	3769.9
29.2	-57.3127	30.5463		29.2	-21.1946	99.6537		29.2	-1621.62	1212.54		29.2	-89.8708	176.665		29.2	-1600.1	2448.04		29.2	-5472.03	3771.77
29.3	-56.6899	30.5463		29.3	-33.3384	171.583		29.3	-1594.53	1206.62		29.3	-87.3798	175.108		29.3	-1556.5	2403.2		29.3	-5457.4	3775.2
29.4	-56.6899	31.169		29.4	-57.3148	250.362		29.4	-1570.55	1229.67		29.4	-92.3618	176.354		29.4	-1504.19	2370.5		29.4	-5446.5	3767.72
29.5	-57.3127	32.4146		29.5	-93.1235	321.979		29.5	-1552.49	1231.54		29.5	-92.6732	178.222		29.5	-1466.2	2340.61		29.5	-5424.7	3760.25
29.6	-56.0672	32.4146		29.6	-132.357	426.292		29.6	-1546.26	1225		29.6	-90.1823	173.551		29.6	-1403.3	2291.41		29.6	-5396.05	3756.82
29.7	-56.0672	30.5463		29.7	-180.621	530.293		29.7	-1549.07	1227.49		29.7	-90.8049	175.108		29.7	-1373.41	2223.53		29.7	-5385.47	3772.39
29.8	-57.3127	31.7918		29.8	-222.035	615.3		29.8	-1529.45	1209.74		29.8	-93.9188	175.419		29.8	-1367.18	2182.12		29.8	-5392.32	3764.61
29.9	-54.8216	29.9235		29.9	-257.221	699.062		29.9	-1520.42	1189.19		29.9	-95.7871	167.946		29.9	-1315.49	2133.86		29.9	-5378.62	3747.48
30	-52.3306	31.169		30	-285.868	724.283		30	-1505.78	1202.89		30	-89.5594	160.162		30	-1249.48	2054.76		30	-5356.82	3749.04
30.1	-52.3306	30.5463		30.1	-307.665	772.547		30.1	-1490.84	1203.51		30.1	-89.8708	151.754		30.1	-1188.45	1974.43		30.1	-5325.99	3759
30.2	-51.0851	30.5463		30.2	-332.575	818.943		30.2	-1501.11	1217.21		30.2	-93.296	154.557		30.2	-1122.13	1922.74		30.2	-5315.41	3770.21
30.3	-52.3306	31.7918		30.3	-352.504	856.932		30.3	-1507.96	1206.31		30.3	-89.8708	154.246		30.3	-1094.72	1890.67		30.3	-5300.15	3773.02
30.4	-54.8216	31.169		30.4	-354.06	877.794		30.4	-1497.69	1196.97		30.4	-94.2301	157.982		30.4	-1087.56	1851.43		30.4	-5291.43	3794.81
30.5	-53.5761	31.7918		30.5	-360.288	917.651		30.5	-1485.54	1185.76		30.5	-87.6912	162.964		30.5	-1059.23	1788.22		30.5	-5284.27	3783.29
30.6	-51.7078	34.2828		30.6	-349.078	959.999		30.6	-1460.63	1171.75		30.6	-91.7391	165.767		30.6	-1021.55	1766.11		30.6	-5267.14	3763.36
30.7	-51.0851	35.5284		30.7	-352.815	989.891		30.7	-1459.7	1172.68		30.7	-90.1823	170.749		30.7	-972.975	1717.85		30.7	-5242.23	3751.84
30.8	-50.4623	32.4146		30.8	-368.384	1003.28		30.8	-1460.01	1185.45		30.8	-88.6254	174.485		30.8	-939.969	1671.77		30.8	-5241.92	3744.68
30.9	-52.9534	33.0373		30.9	-367.138	998.298		30.9	-1456.9	1176.42		30.9	-89.248	163.276		30.9	-913.501	1607.93		30.9	-5244.1	3759.32
31	-50.4623	33.0373		31	-370.564	976.502		31	-1462.81	1185.76		31	-86.4457	166.701		31	-854.65	1565.59		31	-5239.74	3751.22
31.1	-50.4623	29.3007		31.1	-364.647	969.651		31.1	-1452.54	1185.14		31.1	-83.3318	169.814		31.1	-793.62	1508.29		31.1	-5235.38	3739.08
31.2	-51.0851	32.4146		31.2	-354.06	972.142		31.2	-1429.5	1183.27		31.2	-86.7571	181.958		31.2	-764.973	1463.76		31.2	-5220.43	3716.03
31.3	-46.103	30.5463		31.3	-354.06	980.861		31.3	-1441.02	1190.74		31.3	-82.3977	175.419		31.3	-746.29	1389.34		31.3	-5185.56	3691.12
31.4	-49.2168	32.4146		31.4	-348.456	955.328		31.4	-1420.47	1159.29		31.4	-78.3497	170.126		31.4	-724.493	1333.92		31.4	-5180.58	3681.78
31.5	-49.8396	33.0373		31.5	-337.557	911.423		31.5	-1413.3	1131.89		31.5	-73.0563	172.306		31.5	-701.762	1277.87		31.5	-5179.95	3697.35
31.6	-47.9713	30.5463		31.6	-318.252	873.435		31.6	-1398.98	1132.52		31.6	-78.0383	174.485		31.6	-639.798	1244.86		31.6	-5174.66	3702.64
31.7	-51.0851	34.2828		31.7	-309.222	844.788		31.7	-1397.11	1161.47		31.7	-77.7269	164.833		31.7	-596.827	1202.2		31.7	-5150.37	3701.09
31.8	-47.3485	34.2828		31.8	-306.108	838.249		31.8	-1386.84	1177.04		31.8	-84.5774	164.521		31.8	-582.815	1174.8		31.8	-5137.61	3702.96
31.9	-47.9713	31.169		31.9	-308.288	843.854		31.9	-1379.36	1178.29		31.9	-85.5115	168.258		31.9	-583.126	1122.49		31.9	-5126.4	3701.71
32	-46.103	31.169		32	-318.563	860.045		32	-1388.39	1175.49		32	-87.0684	167.323		32	-562.264	1083.88		32	-5132.62	3686.76
32.1	-47.3485	30.5463		32.1	-320.431	865.65		32.1	-1356.63	1157.12		32.1	-76.7928	160.473		32.1	-549.497	1045.27		32.1	-5117.06	3674
32.2	-47.9713	31.7918		32.2	-321.054	889.004		32.2	-1356.01	1134.07		32.2	-76.4814	159.228		32.2	-528.012	1001.36		32.2	-5103.98	3653.76
32.3	-49.2168	29.9235		32.3	-322.922	919.519		32.3	-1365.97	1130.03		32.3	-79.2839	153		32.3	-522.096	959.639		32.3	-5094.01	3673.06
32.4	-46.7257	31.7918		32.4	-330.396	922.944		32.4	-1365.66	1136.25		32.4	-78.0383	151.443		32.4	-512.443	945.938		32.4	-5091.83	3670.26
32.5	-47.9713	31.169		32.5	-335.066	920.453		32.5	-1364.42	1113.21		32.5	-79.5952	162.341		32.5	-480.371	917.914		32.5	-5096.82	3617.95
32.6	-48.594	31.169		32.6	-330.396	932.908		32.6	-1359.75	1103.25		32.6	-78.3497	174.485		32.6	-449.855	880.86		32.6	-5102.11	3632.58
32.7	-47.9713	31.7918		32.7	-336.935	956.885		32.7	-1337.95	1120.37		32.7	-78.3497	179.156		32.7	-428.682	850.033		32.7	-5112.7	3628.54
32.8	-45.4802	33.6601		32.8	-351.258	963.424		32.8	-1333.28	1116.64		32.8	-71.188	173.24		32.8	-389.448	825.434		32.8	-5116.43	3639.43
32.9	-45.4802	31.7918		32.9	-346.587	967.16		32.9	-1349.16	1118.5		32.9	-66.8286	177.288		32.9	-364.537	810.176		32.9	-5087.16	3674.93
33	-46.103	30.5463		33	-332.887	976.502		33	-1343.24	1112.28		33	-70.2539	184.761		33	-361.112	788.38		33	-5087.16	3657.81
33.1	-45.4802	33.0373		33.1	-314.515	994.562		33.1	-1343.24	1109.16		33.1	-71.4994	178.533		33.1	-345.854	772.188		33.1	-5096.19	3626.98
33.2	-45.4802	31.7918		33.2	-300.814	1019.78		33.2	-1354.14	1106.98		33.2	-72.7449	167.635		33.2	-333.399	746.343		33.2	-5089.97	3605.81
33.3	-47.9713	31.169		33.3	-306.108	1021.65		33.3	-1341.06	1109.47		33.3	-72.7449	165.144		33.3	-327.794	731.397		33.3	-5073.77	3602.69
33.4	-46.7257	31.169		33.4	-306.731	1008.89		33.4	-1324.56	1117.57		33.4	-76.7928	167.012		33.4	-319.387	712.091		33.4	-5051.04	3598.02
33.5	-44.2347	31.7918		33.5	-305.174	981.172		33.5	-1324.56	1087.99		33.5	-81.7749	168.569		33.5	-319.387	700.882		33.5	-5058.52	3600.82
33.6	-42.3664	29.3007		33.6	-303.617	972.454		33.6	-1327.67	1066.19		33.6	-80.218	172.617		33.6	-317.519	685.624		33.6	-5042.64	3610.79
33.7	-46.103	30.5463		33.7	-291.784	960.933		33.7	-1317.09	1059.03		33.7	-78.0383	182.27		33.7	-322.189	659.157		33.7	-5024.58	3600.82
33.8	-44.8575	31.7918		33.8	-277.461	950.346		33.8	-1307.12	1071.49		33.8	-81.4635	176.976		33.8	-312.537	641.719		33.8	-5015.86	3593.35
33.9	-41.7437	32.4146		33.9	-265.628	931.974		33.9	-1290.93	1095.15		33.9	-83.9546	167.323		33.9	-314.716	621.48		33.9	-5010.56	3603.94
34	-41.1209	33.0373		34	-267.808	917.651		34	-1286.26	1103.25		34	-84.8888	176.665		34	-320.633	614.941		34	-5001.53	3602.38
34.1	-42.3664	30.5463		34.1	-262.515	910.178		34.1	-1256.99	1076.78		34.1	-77.7269	168.258		34.1	-318.764	618.366		34.1	-4983.47	3606.43
34.2	-41.1209	31.169		34.2	-255.664	886.201		34.2	-1253.88	1069.31		34.2	-80.218	166.389		34.2	-305.686	623.348		34.2	-4979.11	3593.66
34.3	-39.8754	31.169		34.3	-255.353	853.195		34.3	-1251.39	1086.12		34.3	-80.5294	169.814		34.3	-296.968	628.953		34.3	-4979.74	3580.27
34.4	-38.6299	28.678		34.4	-241.341	825.482		34.4	-1245.78	1082.07		34.4	-83.3318	161.719		34.4	-286.692	614.629		34.4	-4982.85	3578.4
34.5	-40.4981	31.169		34.5	-230.754	801.506		34.5	-1235.51	1073.04		34.5	-81.4635	164.521		34.5	-271.746	595.324		34.5	-4964.48	3571.86
34.6	-42.3664	28.678		34.6	-230.131	783.446		34.6	-1253.25	1068.06		34.6	-72.1222	167.323		34.6	-267.075	574.773		34.6	-4938.01	3575.6
34.7	-39.2526	31.169		34.7	-231.377	770.056		34.7	-1256.06	1048.13		34.7	-73.6791	155.491		34.7	-267.075	567.299		34.7	-4927.74	3583.39
34.8	-39.8754	29.9235		34.8	-219.544	748.571		34.8	-1247.03	1066.19		34.8	-70.5652	156.737		34.8	-269.566	545.191		34.8	-4921.82	3590.55
34.9	-42.3664	34.2828		34.9	-217.364	731.134		34.9	-1241.11	1070.24		34.9	-69.0083	154.868		34.9	-273.925	545.503		34.9	-4923.38	3607.67
35	-39.8754	30.5463		35	-220.167	721.481		35	-1220.25	1076.47		35	-68.0742	150.198		35	-272.68	554.533		35	-4920.89	3605.81
35.1	-41.7437	31.7918		35.1	-217.364	712.139		35.1	-1220.56	1064.01		35.1	-77.7269	159.228		35.1	-258.668	549.551		35.1	-4908.74	3598.33
35.2	-43.6119	29.3007		35.2	-213.628	685.983		35.2	-1218.38	1060.28		35.2	-77.7269	159.85		35.2	-242.787	532.114		35.2	-4909.05	3591.48
35.3	-39.2526	30.5463		35.3	-205.843	661.696		35.3	-1216.2	1064.95		35.3	-73.6791	165.144		35.3	-236.248	524.952		35.3	-4903.45	3603.63
35.4	-38.0071	34.2828		35.4	-198.37	652.354		35.4	-1207.48	1064.32		35.4	-69.3197	167.323		35.4	-233.757	519.97		35.4	-4891.62	3581.83
35.5	-39.2526	31.169		35.5	-197.125	648.618		35.5	-1188.18	1069.62		35.5	-65.2717	169.814		35.5	-225.973	507.514		35.5	-4879.47	3557.23
35.6	-41.7437	31.7918		35.6	-194.322	640.833		35.6	-1176.34	1068.99		35.6	-61.5352	173.551		35.6	-219.434	489.143		35.6	-4881.65	3532.32
35.7	-41.7437	31.169		35.7	-187.16	623.396		35.7	-1167.31	1069.62		35.7	-60.2897	161.719		35.7	-219.434	477.622		35.7	-4882.27	3527.34
35.8	-41.1209	33.0373		35.8	-173.148	618.725		35.8	-1168.25	1070.86		35.8	-60.2897	158.916		35.8	-221.613	484.472		35.8	-4888.5	3546.95
35.9	-39.2526	31.7918		35.9	-166.298	612.498		35.9	-1171.67	1060.28		35.9	-60.9125	149.575		35.9	-217.566	498.796		35.9	-4888.5	3555.67
36	-38.0071	30.5463		36	-163.184	591.324		36	-1166.69	1047.82		36	-60.2897	152.066		36	-204.488	493.814		36	-4881.65	3547.58
36.1	-39.2526	31.7918		36.1	-157.268	572.33		36.1	-1173.85	1050.62		36.1	-60.2897	157.982		36.1	-209.781	472.017		36.1	-4865.15	3547.58
36.2	-36.1388	29.9235		36.2	-157.579	556.449		36.2	-1175.1	1032.87		36.2	-58.11	162.653		36.2	-206.979	445.238		36.2	-4856.12	3545.4
36.3	-37.3843	29.3007		36.3	-153.843	544.617		36.3	-1172.29	1037.86		36.3	-52.1937	167.635		36.3	-192.655	435.897		36.3	-4846.78	3537.3
36.4	-38.6299	29.3007		36.4	-144.813	534.652		36.4	-1166.38	1047.2		36.4	-45.3434	164.21		36.4	-185.493	425.31		36.4	-4833.7	3525.16
36.5	-39.2526	31.7918		36.5	-133.914	523.131		36.5	-1157.97	1047.82		36.5	-40.6727	168.258		36.5	-193.278	428.424		36.5	-4834.01	3508.34
36.6	-38.6299	31.7918		36.6	-132.669	501.958		36.6	-1148.32	1052.8		36.6	-36.002	172.617		36.6	-212.895	435.586		36.6	-4825.92	3525.16
36.7	-39.2526	30.5463		36.7	-124.884	488.257		36.7	-1143.65	1058.72		36.7	-39.1158	166.701		36.7	-210.404	431.849		36.7	-4816.57	3522.67
36.8	-39.2526	31.7918		36.8	-112.118	477.047		36.8	-1151.43	1046.26		36.8	-46.9003	167.323		36.8	-183.002	433.094		36.8	-4816.26	3512.7
36.9	-39.2526	34.2828		36.9	-107.758	484.52		36.9	-1151.43	1039.1		36.9	-43.4751	169.192		36.9	-172.727	435.274		36.9	-4825.29	3513.32
37	-37.3843	31.7918		37	-111.184	464.281		37	-1143.65	1027.27		37	-43.1637	167.012		37	-169.613	421.262		37	-4848.96	3512.7
37.1	-36.1388	31.169		37.1	-107.758	452.759		37.1	-1132.13	1003.29		37.1	-43.4751	162.03		37.1	-163.697	424.376		37.1	-4822.49	3494.02
37.2	-36.7616	33.0373		37.2	-100.597	434.077		37.2	-1132.75	1008.9		37.2	-37.8702	162.341		37.2	-158.715	426.867		37.2	-4799.76	3497.44
37.3	-36.1388	33.0373		37.3	-92.8121	421.933		37.3	-1129.95	1018.24		37.3	-36.6248	171.06		37.3	-156.535	422.196		37.3	-4780.45	3514.26
37.4	-36.7616	31.7918		37.4	-86.5845	406.986		37.4	-1133.68	1031.63		37.4	-40.3613	173.551		37.4	-160.583	438.077		37.4	-4749	3521.73
37.5	-39.2526	31.7918		37.5	-82.848	392.04		37.5	-1138.35	1037.23		37.5	-41.6068	169.192		37.5	-146.259	452.4		37.5	-4752.43	3526.4
37.6	-37.3843	30.5463		37.6	-76.9317	388.615		37.6	-1138.35	1028.52		37.6	-38.1816	164.833		37.6	-141.9	449.286		37.6	-4768.31	3505.85
37.7	-36.7616	30.5463		37.7	-79.1114	370.866		37.7	-1129.95	1011.39		37.7	-34.4451	169.503		37.7	-148.128	443.37		37.7	-4770.49	3485.3
37.8	-34.8933	29.9235		37.8	-74.7521	371.489		37.8	-1121.23	998.311		37.8	-37.5588	165.767		37.8	-144.391	434.34		37.8	-4798.82	3480.63
37.9	-35.516	30.5463		37.9	-63.231	372.112		37.9	-1110.02	1002.98		37.9	-36.002	162.964		37.9	-129.756	418.46		37.9	-4796.33	3469.73
38	-36.7616	32.4146		38	-68.5245	374.603		38	-1112.82	985.545		38	-40.0499	162.964		38	-125.397	417.525		38	-4762.39	3486.23
38.1	-36.7616	31.7918		38.1	-68.2131	361.836		38.1	-1120.61	978.383		38.1	-38.8044	163.276		38.1	-129.445	413.789		38.1	-4753.99	3505.23
38.2	-32.4022	31.7918		38.2	-66.6562	352.183		38.2	-1107.53	974.958		38.2	-33.8223	159.228		38.2	-140.032	401.956		38.2	-4738.11	3502.43
38.3	-36.7616	31.7918		38.3	-64.1651	351.249		38.3	-1100.68	972.467		38.3	-34.4451	156.737		38.3	-147.816	387.944		38.3	-4713.82	3485.92
38.4	-36.7616	29.9235		38.4	-55.1351	348.758		38.4	-1094.14	990.838		38.4	-36.002	159.539		38.4	-138.163	376.112		38.4	-4704.79	3480.63
38.5	-36.1388	30.5463		38.5	-54.8237	350.627		38.5	-1100.99	961.257		38.5	-35.0679	159.539		38.5	-129.756	375.8		38.5	-4704.79	3500.25
38.6	-36.1388	26.8097		38.6	-56.692	352.495		38.6	-1100.37	945.688		38.6	-34.7565	160.162		38.6	-132.247	375.8		38.6	-4687.97	3482.19
38.7	-34.8933	30.5463		38.7	-50.7758	341.285		38.7	-1076.08	936.969		38.7	-35.0679	167.012		38.7	-134.427	362.1		38.7	-4681.43	3458.83
38.8	-34.8933	29.3007		38.8	-46.7278	319.8		38.8	-1075.77	933.544		38.8	-36.002	170.749		38.8	-140.343	363.034		38.8	-4685.48	3447
38.9	-33.6478	30.5463		38.9	-41.123	315.129		38.9	-1084.8	938.215		38.9	-35.0679	173.863		38.9	-140.343	377.046		38.9	-4692.02	3438.59
39	-33.6478	30.5463		39	-42.9912	325.405		39	-1092.89	950.047		39	-30.3971	172.617		39	-132.559	361.477		39	-4683.3	3445.76
39.1	-37.3843	31.7918		39.1	-45.4823	315.44		39.1	-1093.83	949.424		39.1	-35.0679	170.126		39.1	-132.87	355.249		39.1	-4663.37	3466.31
39.2	-37.3843	32.4146		39.2	-38.9433	292.398		39.2	-1096.32	938.837		39.2	-36.9362	162.964		39.2	-140.032	342.171		39.2	-4662.13	3482.5
39.3	-34.8933	31.169		39.3	-43.3026	293.333		39.3	-1084.8	949.736		39.3	-29.463	158.605		39.3	-146.571	338.435		39.3	-4650.61	3459.77
39.4	-34.2705	31.7918		39.4	-41.4343	293.644		39.4	-1081.99	962.502		39.4	-25.7264	156.737		39.4	-142.211	346.842		39.4	-4641.58	3469.11
39.5	-29.9112	30.5463		39.5	-38.6319	288.662		39.5	-1074.83	960.634		39.5	-23.8582	153		39.5	-136.295	336.878		39.5	-4649.67	3476.27
39.6	-32.4022	27.4325		39.6	-39.5661	286.482		39.6	-1080.75	969.664		39.6	-25.1036	153.311		39.6	-135.984	331.896		39.6	-4632.55	3465.37
39.7	-34.2705	29.3007		39.7	-34.8953	284.614		39.7	-1092.58	973.712		39.7	-31.3313	155.18		39.7	-130.068	320.997		39.7	-4636.28	3457.9
39.8	-34.8933	29.9235		39.8	-33.0271	281.5		39.8	-1086.67	969.664		39.8	-33.511	152.689		39.8	-120.103	314.77		39.8	-4654.97	3444.82
39.9	-32.4022	31.7918		39.9	-42.6799	283.68		39.9	-1093.2	954.406		39.9	-33.8223	159.539		39.9	-107.648	320.997		39.9	-4644.07	3435.79
40	-31.1567	32.4146		40	-45.1709	280.255		40	-1085.11	936.346		40	-27.9061	160.784		40	-102.666	318.195		40	-4632.86	3416.8
40.1	-28.6657	32.4146		40.1	-46.7278	285.237		40.1	-1082.31	937.281		40.1	-22.6127	159.228		40.1	-111.696	314.77		40.1	-4612.93	3432.37
40.2	-29.9112	31.7918		40.2	-49.5302	287.105		40.2	-1075.77	944.131		40.2	-25.1036	162.341		40.2	-113.564	315.704		40.2	-4622.9	3450.11
40.3	-31.1567	31.7918		40.3	-47.6619	280.566		40.3	-1077.64	939.149		40.3	-23.5468	172.928		40.3	-115.433	311.656		40.3	-4634.42	3454.47
40.4	-29.9112	31.7918		40.4	-50.7758	265.62		40.4	-1073.59	941.951		40.4	-29.463	171.683		40.4	-120.415	318.506		40.4	-4612.62	3437.35
40.5	-29.9112	31.169		40.5	-47.0392	260.949		40.5	-1067.98	931.987		40.5	-23.5468	165.455		40.5	-123.217	323.8		40.5	-4611.37	3431.43
40.6	-32.4022	31.169		40.6	-41.4343	265.308		40.6	-1072.34	917.664		40.6	-24.481	167.323		40.6	-120.103	328.471		40.6	-4630.06	3429.56
40.7	-31.7795	30.5463		40.7	-35.2067	263.751		40.7	-1069.85	923.891		40.7	-28.8402	176.042		40.7	-110.762	319.129		40.7	-4618.54	3408.08
40.8	-31.7795	28.0552		40.8	-33.3384	267.177		40.8	-1063.93	911.747		40.8	-26.6605	173.551		40.8	-104.534	308.854		40.8	-4616.04	3401.54
40.9	-29.9112	29.3007		40.9	-32.7157	265.62		40.9	-1048.37	923.58		40.9	-26.3491	166.078		40.9	-101.109	306.985		40.9	-4602.66	3430.19
41	-31.1567	31.169		41	-32.0929	245.38		41	-1040.58	917.352		41	-26.0378	169.503		41	-98.3067	318.818		41	-4604.21	3414.93
41.1	-31.7795	31.169		41.1	-37.075	236.35		41.1	-1041.2	906.454		41.1	-22.6127	173.863		41.1	-99.2409	333.764		41.1	-4623.83	3385.04
41.2	-35.516	29.3007		41.2	-36.7636	235.104		41.2	-1038.71	895.867		41.2	-22.6127	167.946		41.2	-104.223	330.339		41.2	-4615.11	3399.36
41.3	-33.6478	32.4146		41.3	-37.075	233.859		41.3	-1042.14	898.981		41.3	-22.3013	159.228		41.3	-105.157	323.488		41.3	-4619.78	3396.56
41.4	-33.025	30.5463		41.4	-34.584	229.188		41.4	-1040.89	881.855		41.4	-26.6605	161.719		41.4	-107.96	306.363		41.4	-4607.95	3398.43
41.5	-33.6478	31.169		41.5	-31.7815	224.829		41.5	-1050.55	892.13		41.5	-24.1696	166.389		41.5	-109.205	302.937		41.5	-4605.46	3379.43
41.6	-31.7795	32.4146		41.6	-24.9312	230.122		41.6	-1041.52	909.256		41.6	-23.8582	153		41.6	-100.486	292.973		41.6	-4597.67	3360.13
41.7	-34.2705	28.678		41.7	-28.045	230.122		41.7	-1020.34	902.717		41.7	-23.5468	156.737		41.7	-95.5043	281.763		41.7	-4569.65	3380.37
41.8	-31.7795	28.0552		41.8	-34.2726	232.925		41.8	-1014.74	903.651		41.8	-26.9719	154.557		41.8	-93.9474	269.931		41.8	-4551.9	3388.15
41.9	-31.1567	30.5463		41.9	-28.9791	226.386		41.9	-1016.6	910.19		41.9	-26.9719	163.898		41.9	-94.5702	257.476		41.9	-4551.59	3374.45
42	-29.2884	29.9235		42	-29.2905	223.583		42	-1026.57	927.005		42	-22.924	173.24		42	-97.3726	267.129		42	-4552.52	3402.78
42.1	-31.7795	31.7918		42.1	-31.7815	211.439		42.1	-1024.7	913.304		42.1	-31.0199	176.354		42.1	-97.684	265.883		42.1	-4548.47	3391.89
42.2	-28.0429	31.169		42.2	-36.1409	213.93		42.2	-1023.45	880.921		42.2	-28.2174	182.893		42.2	-97.0612	282.698		42.2	-4546.3	3379.74
42.3	-29.2884	31.7918		42.3	-37.075	216.11		42.3	-1035.29	890.885		42.3	-27.2833	182.27		42.3	-93.0133	281.763		42.3	-4539.76	3382.55
42.4	-29.2884	30.5463		42.4	-36.4522	212.996		42.4	-1044.01	889.328		42.4	-26.0378	181.958		42.4	-94.5702	280.829		42.4	-4535.09	3372.89
42.5	-28.6657	29.3007		42.5	-36.7636	215.799		42.5	-1044.01	885.903		42.5	-28.8402	175.108		42.5	-89.8995	273.979		42.5	-4534.46	3373.2
42.6	-29.2884	31.169		42.6	-41.123	210.817		42.6	-1032.48	878.118		42.6	-27.5947	165.767		42.6	-93.0133	263.703		42.6	-4520.45	3386.28
42.7	-28.6657	31.169		42.7	-45.4823	205.212		42.7	-1032.8	878.118		42.7	-32.5768	167.323		42.7	-90.8336	255.296		42.7	-4506.13	3408.08
42.8	-27.4202	26.1869		42.8	-50.153	203.655		42.8	-1030.31	874.693		42.8	-32.2654	174.485		42.8	-88.3425	268.685		42.8	-4490.87	3398.74
42.9	-28.0429	28.678		42.9	-44.5481	200.23		42.9	-1026.57	881.232		42.9	-29.1516	175.419		42.9	-81.1808	267.129		42.9	-4487.13	3380.37
43	-28.0429	29.9235		43	-44.2368	195.248		43	-1029.68	873.136		43	-23.5468	175.419		43	-92.7019	252.494		43	-4495.23	3381.3
43.1	-27.4202	29.9235		43.1	-45.4823	184.349		43.1	-1039.34	849.471		43.1	-21.3671	169.814		43.1	-87.7198	243.464		43.1	-4484.33	3379.43
43.2	-26.1746	30.5463		43.2	-51.3985	189.331		43.2	-1050.23	866.286		43.2	-26.9719	173.863		43.2	-81.4922	242.218		43.2	-4472.81	3389.4
43.3	-27.4202	31.7918		43.3	-53.2668	188.709		43.3	-1026.26	875.316		43.3	-21.9899	167.323		43.3	-76.5101	234.122		43.3	-4472.19	3377.87
43.4	-27.4202	29.3007		43.4	-53.2668	179.367		43.4	-1018.16	858.19		43.4	-24.481	162.03		43.4	-79.6239	232.565		43.4	-4484.02	3366.66
43.5	-27.4202	29.3007		43.5	-48.9075	181.858		43.5	-1005.08	836.082		43.5	-21.3671	177.91		43.5	-79.9353	221.356		43.5	-4502.39	3354.52
43.6	-26.1746	28.0552		43.6	-48.9075	186.218		43.6	-1012.87	845.112		43.6	-21.0557	183.204		43.6	-79.9353	220.733		43.6	-4501.77	3344.87
43.7	-30.534	30.5463		43.7	-52.0213	184.349		43.7	-1006.33	847.914		43.7	-17.3191	188.186		43.7	-77.1328	224.469		43.7	-4489	3346.74
43.8	-28.0429	30.5463		43.8	-44.5481	184.038		43.8	-1013.8	842.309		43.8	-16.0736	180.402		43.8	-77.7556	220.733		43.8	-4492.74	3347.36
43.9	-33.025	28.0552		43.9	-35.8295	183.104		43.9	-1007.89	846.98		43.9	-23.8582	175.108		43.9	-76.8215	216.996		43.9	-4493.36	3333.04
44	-31.1567	29.9235		44	-35.8295	183.104		44	-1008.51	850.094		44	-26.6605	174.485		44	-69.0369	221.667		44	-4479.97	3347.98
44.1	-33.6478	29.9235		44.1	-33.6498	188.709		44.1	-1003.84	837.016		44.1	-21.3671	178.222		44.1	-66.2345	222.29		44.1	-4463.78	3369.47
44.2	-31.7795	28.678		44.2	-33.9612	192.134		44.2	-995.119	840.13		44.2	-20.433	178.533		44.2	-70.9052	233.811		44.2	-4458.8	3351.41
44.3	-33.6478	28.678		44.3	-31.1588	189.954		44.3	-992.94	839.507		44.3	-15.1395	165.144		44.3	-64.3662	230.697		44.3	-4457.24	3347.05
44.4	-38.0071	28.0552		44.4	-29.2905	186.84		44.4	-988.892	817.399		44.4	-20.433	156.425		44.4	-59.3841	226.026		44.4	-4462.85	3349.54
44.5	-41.7437	28.678		44.5	-28.9791	180.301		44.5	-990.137	821.135		44.5	-17.6305	152.689		44.5	-57.8272	221.356		44.5	-4469.07	3346.11
44.6	-44.8575	30.5463		44.6	-30.2246	186.529		44.6	-989.514	837.639		44.6	-17.6305	156.737		44.6	-54.7134	217.93		44.6	-4463.47	3340.82
44.7	-44.8575	30.5463		44.7	-24.9312	188.086		44.7	-990.76	826.429		44.7	-18.2533	164.833		44.7	-51.5996	220.733		44.7	-4461.6	3341.44
44.8	-46.103	28.0552		44.8	-28.9791	188.709		44.8	-986.712	821.447		44.8	-23.2354	167.946		44.8	-50.9769	222.29		44.8	-4450.39	3328.68
44.9	-48.594	26.8097		44.9	-33.9612	185.906		44.9	-993.874	822.381		44.9	-22.3013	166.078		44.9	-44.7493	221.978		44.9	-4452.57	3320.89
45	-41.7437	30.5463		45	-34.584	181.235		45	-990.449	819.579		45	-22.924	165.767		45	-40.3899	220.11		45	-4448.21	3314.98
45.1	-44.8575	28.678		45.1	-32.0929	177.188		45.1	-973.323	820.513		45.1	-22.924	170.437		45.1	-47.8631	219.176		45.1	-4419.25	3319.33
45.2	-44.2347	28.678		45.2	-35.2067	173.14		45.2	-977.993	823.004		45.2	-16.385	167.946		45.2	-55.3362	212.948		45.2	-4407.73	3330.54
45.3	-40.4981	28.0552		45.3	-41.123	164.421		45.3	-976.437	827.363		45.3	-12.337	165.144		45.3	-54.0907	209.835		45.3	-4407.73	3320.58
45.4	-41.7437	29.9235		45.4	-44.8595	159.439		45.4	-979.55	822.692		45.4	-11.403	162.653		45.4	-50.3541	219.487		45.4	-4407.73	3296.29
45.5	-41.1209	28.678		45.5	-45.7937	156.948		45.5	-976.748	816.153		45.5	-11.403	171.06		45.5	-52.8452	214.194		45.5	-4419.25	3278.54
45.6	-41.7437	30.5463		45.6	-45.7937	154.768		45.6	-970.52	811.794		45.6	-11.7142	175.419		45.6	-52.2224	208.9		45.6	-4405.24	3295.67
45.7	-42.9892	31.7918		45.7	-46.105	145.738		45.7	-961.802	827.052		45.7	-5.48669	175.108		45.7	-48.4858	217.619		45.7	-4393.72	3313.42
45.8	-40.4981	29.3007		45.8	-45.4823	153.523		45.8	-954.017	827.052		45.8	-7.04358	174.174		45.8	-50.6655	223.535		45.8	-4376.9	3298.78
45.9	-42.3664	28.0552		45.9	-42.9912	167.846		45.9	-967.718	842.932		45.9	-12.337	174.485		45.9	-55.6476	237.236		45.9	-4372.54	3288.2
46	-43.6119	27.4325		46	-41.7457	174.074		46	-974.88	838.573		46	-17.0078	188.186		46	-49.7314	246.577		46	-4381.26	3290.07
46.1	-39.8754	28.0552		46.1	-40.5002	176.253		46.1	-968.652	830.166		46.1	-23.8582	190.677		46.1	-43.1924	244.086		46.1	-4375.66	3305.01
46.2	-38.6299	29.9235		46.2	-41.123	181.858		46.2	-952.149	824.249		46.2	-21.6785	189.432		46.2	-48.1744	240.038		46.2	-4354.8	3327.12
46.3	-38.0071	27.4325		46.3	-41.4343	184.972		46.3	-954.951	799.962		46.3	-21.0557	171.372		46.3	-49.1086	233.499		46.3	-4354.48	3330.23
46.4	-40.4981	28.0552		46.4	-42.6799	183.727		46.4	-958.999	797.159		46.4	-19.4988	164.833		46.4	-47.5517	225.092		46.4	-4360.09	3295.67
46.5	-37.3843	28.678		46.5	-42.0571	190.577		46.5	-951.215	794.045		46.5	-16.0736	165.767		46.5	-49.1086	232.254		46.5	-4368.19	3297.23
46.6	-34.8933	29.3007		46.6	-42.9912	195.559		46.6	-948.412	807.746		46.6	-12.6484	169.814		46.6	-46.3062	234.122		46.6	-4361.65	3291.93
46.7	-36.7616	29.3007		46.7	-38.3205	194.002		46.7	-945.61	791.243		46.7	-19.4988	160.473		46.7	-49.7314	230.074		46.7	-4362.27	3290.69
46.8	-36.1388	25.5642		46.8	-34.2726	190.577		46.8	-948.724	788.129		46.8	-19.8102	159.539		46.8	-57.5159	217.93		46.8	-4366.94	3302.21
46.9	-35.516	28.0552		46.9	-32.0929	179.056		46.9	-935.957	805.878		46.9	-17.6305	168.88		46.9	-55.6476	213.882		46.9	-4363.83	3306.26
47	-36.1388	29.3007		47	-35.2067	182.792		47	-937.514	804.944		47	-21.3671	172.928		47	-52.8452	211.391		47	-4361.33	3298.47
47.1	-31.7795	27.4325		47.1	-35.2067	176.253		47.1	-943.43	805.878		47.1	-19.4988	172.617		47.1	-44.7493	207.655		47.1	-4356.04	3307.5
47.2	-31.7795	28.0552		47.2	-30.8474	175.319		47.2	-948.101	801.83		47.2	-21.6785	167.012		47.2	-45.9948	201.427		47.2	-4332.69	3303.45
47.3	-34.8933	28.678		47.3	-29.6019	185.906		47.3	-928.172	793.423		47.3	-17.6305	169.814		47.3	-44.7493	206.721		47.3	-4348.26	3302.52
47.4	-34.8933	28.0552		47.4	-30.2246	177.499		47.4	-924.436	795.602		47.4	-17.6305	171.372		47.4	-42.5696	207.032		47.4	-4339.23	3318.4
47.5	-35.516	27.4325		47.5	-33.0271	170.649		47.5	-924.436	795.602		47.5	-14.5167	165.767		47.5	-45.9948	202.361		47.5	-4332.07	3305.63
47.6	-35.516	27.4325		47.6	-33.6498	173.451		47.6	-914.783	782.836		47.6	-13.8939	158.916		47.6	-43.5037	208.278		47.6	-4326.15	3278.23
47.7	-37.3843	24.9414		47.7	-33.6498	180.301		47.7	-898.28	802.141		47.7	-18.5647	162.03		47.7	-34.1623	200.493		47.7	-4315.87	3276.05
47.8	-36.7616	28.678		47.8	-38.9433	173.14		47.8	-909.801	810.549		47.8	-19.8102	157.359		47.8	-39.1444	184.924		47.8	-4303.11	3268.27
47.9	-39.2526	27.4325		47.9	-38.9433	162.553		47.9	-908.244	789.997		47.9	-18.5647	158.605		47.9	-43.8151	187.415		47.9	-4291.9	3271.38
48	-39.2526	28.678		48	-37.6978	159.75		48	-897.969	784.704		48	-26.3491	168.569		48	-43.8151	182.122		48	-4291.59	3272.94
48.1	-37.3843	27.4325		48.1	-36.7636	171.583		48.1	-889.561	792.177		48.1	-27.9061	179.156		48.1	-44.7493	178.074		48.1	-4299.99	3272.94
48.2	-36.7616	28.678		48.2	-38.3205	164.11		48.2	-886.447	785.638		48.2	-26.3491	182.581		48.2	-45.0606	186.792		48.2	-4309.96	3281.66
48.3	-36.7616	26.8097		48.3	-37.3864	156.948		48.3	-879.286	778.476		48.3	-26.0378	185.072		48.3	-40.0786	184.613		48.3	-4332.07	3294.42
48.4	-35.516	27.4325		48.4	-33.0271	156.325		48.4	-880.843	783.147		48.4	-21.0557	181.024		48.4	-42.881	188.661		48.4	-4335.49	3308.75
48.5	-34.2705	28.678		48.5	-36.4522	152.9		48.5	-870.878	799.339		48.5	-19.1874	175.108		48.5	-41.9468	189.283		48.5	-4330.82	3293.49
48.6	-36.7616	28.678		48.6	-33.0271	145.115		48.6	-863.094	786.261		48.6	-21.0557	174.797		48.6	-39.7672	187.104		48.6	-4324.28	3267.33
48.7	-36.7616	29.9235		48.7	-34.8953	158.193		48.7	-874.615	781.279		48.7	-22.924	180.402		48.7	-32.6054	181.188		48.7	-4311.51	3263.29
48.8	-34.8933	28.0552		48.8	-41.123	158.816		48.8	-877.729	779.099		48.8	-21.3671	175.419		48.8	-31.3599	183.056		48.8	-4301.86	3284.77
48.9	-34.8933	27.4325		48.9	-41.7457	160.996		48.9	-872.435	797.782		48.9	-19.1874	169.192		48.9	-36.6534	178.696		48.9	-4303.73	3265.78
49	-36.7616	29.3007		49	-39.5661	167.223		49	-876.172	789.686		49	-16.0736	171.372		49	-36.9647	182.122		49	-4306.53	3259.24
49.1	-36.7616	27.4325		49.1	-37.6978	162.241		49.1	-873.681	782.524		49.1	-14.5167	171.994		49.1	-31.9827	181.81		49.1	-4313.69	3263.6
49.2	-36.1388	26.8097		49.2	-34.584	161.619		49.2	-873.992	778.788		49.2	-16.0736	175.108		49.2	-29.1802	184.613		49.2	-4321.79	3262.66
49.3	-40.4981	26.1869		49.3	-34.2726	157.882		49.3	-875.861	780.033		49.3	-14.2053	168.88		49.3	-34.1623	181.188		49.3	-4308.4	3262.04
49.4	-36.7616	26.8097		49.4	-36.7636	152.9		49.4	-876.795	786.572		49.4	-9.22327	161.719		49.4	-38.833	185.547		49.4	-4297.81	3268.89
49.5	-34.8933	26.1869		49.5	-40.1888	165.044		49.5	-870.878	781.279		49.5	-15.1395	162.341		49.5	-34.4737	191.152		49.5	-4288.78	3275.74
49.6	-34.8933	28.0552		49.6	-29.9133	168.78		49.6	-881.154	770.692		49.6	-16.0736	172.928		49.6	-32.9168	186.17		49.6	-4276.95	3257.99
49.7	-36.1388	25.5642		49.7	-29.2905	174.074		49.7	-878.352	784.393		49.7	-17.3191	176.665		49.7	-34.7851	176.205		49.7	-4247.06	3249.27
49.8	-36.1388	24.9414		49.8	-27.1108	168.78		49.8	-869.944	809.303		49.8	-19.1874	173.24		49.8	-40.3899	170.601		49.8	-4238.65	3272.63
49.9	-33.6478	24.3187		49.9	-29.2905	167.535		49.9	-871.19	813.04		49.9	-17.6305	171.372		49.9	-41.6355	166.864		49.9	-4234.91	3283.84
50	-33.025	26.8097		50	-30.536	168.157		50	-875.861	792.489		50	-12.6484	178.222		50	-40.7013	169.666		50	-4231.49	3269.51
50.1	-34.8933	28.678		50.1	-37.6978	165.978		50.1	-870.256	780.345		50.1	-10.7802	186.006		50.1	-48.1744	171.846		50.1	-4247.68	3257.06
50.2	-29.9112	29.9235		50.2	-33.0271	170.96		50.2	-859.357	781.59		50.2	-6.1095	181.024		50.2	-54.7134	174.026		50.2	-4256.71	3267.33
50.3	-29.2884	24.9414		50.3	-31.7815	165.666		50.3	-859.046	784.393		50.3	-6.1095	174.174		50.3	-55.0248	184.613		50.3	-4247.06	3260.48
50.4	-29.9112	28.0552		50.4	-34.584	155.702		50.4	-864.651	791.243		50.4	-6.73218	170.126		50.4	-50.3541	192.086		50.4	-4239.59	3252.7
50.5	-29.2884	28.678		50.5	-34.584	156.014		50.5	-857.489	785.638		50.5	-8.91187	164.521		50.5	-57.2045	195.822		50.5	-4237.09	3235.89
50.6	-31.1567	29.3007		50.6	-33.9612	162.553		50.6	-858.423	786.572		50.6	-11.0916	168.569		50.6	-52.8452	186.792		50.6	-4243.01	3228.72
50.7	-35.516	29.9235		50.7	-35.5181	161.93		50.7	-872.747	793.734		50.7	-12.9598	171.994		50.7	-44.4379	191.774		50.7	-4240.21	3231.53
50.8	-31.7795	26.1869		50.8	-39.5661	163.798		50.8	-873.37	796.225		50.8	-8.28906	175.419		50.8	-39.1444	188.661		50.8	-4242.08	3226.85
50.9	-34.8933	26.8097		50.9	-35.8295	149.163		50.9	-866.208	804.632		50.9	-3.61841	177.91		50.9	-35.0965	183.367		50.9	-4238.96	3232.77
51	-34.2705	26.8097		51	-29.9133	147.606		51	-867.765	796.536		51	0.118164	178.844		51	-33.8509	193.954		51	-4243.94	3226.54
51.1	-34.8933	29.3007		51.1	-29.9133	146.361		51.1	-859.98	789.686		51.1	-5.48669	187.252		51.1	-36.6534	199.248		51.1	-4236.47	3232.46
51.2	-34.8933	27.4325		51.2	-33.0271	149.163		51.2	-865.896	796.848		51.2	-2.99561	181.647		51.2	-43.1924	188.972		51.2	-4203.47	3243.36
51.3	-36.1388	24.9414		51.3	-32.0929	151.032		51.3	-874.926	788.129		51.3	-3.61841	178.844		51.3	-46.3062	180.253		51.3	-4213.43	3241.18
51.4	-36.1388	26.8097		51.4	-33.6498	150.097		51.4	-872.747	774.74		51.4	-9.84595	171.683		51.4	-48.7972	169.666		51.4	-4233.36	3236.51
51.5	-34.2705	26.1869		51.5	-33.3384	147.918		51.5	-872.435	768.512		51.5	-10.7802	162.964		51.5	-53.1565	165.307		51.5	-4232.42	3228.72
51.6	-31.7795	26.1869		51.6	-32.0929	146.672		51.6	-853.13	760.105		51.6	-9.84595	157.982		51.6	-55.959	167.175		51.6	-4246.12	3220
51.7	-31.1567	29.3007		51.7	-28.3564	141.379		51.7	-851.261	781.279		51.7	-7.97778	169.192		51.7	-60.9411	168.421		51.7	-4250.17	3222.18
51.8	-31.1567	28.678		51.8	-29.6019	143.558		51.8	-841.609	781.59		51.8	-12.6484	167.012		51.8	-61.8752	170.912		51.8	-4254.84	3232.77
51.9	-34.8933	26.8097		51.9	-27.7336	133.283		51.9	-838.806	774.428		51.9	-2.6842	165.455		51.9	-63.1207	168.732		51.9	-4234.91	3233.39
52	-33.6478	27.4325		52	-23.3743	132.971		52	-849.393	766.333		52	-1.12732	177.91		52	-66.5459	168.11		52	-4217.17	3221.87
52.1	-31.7795	28.0552		52.1	-24.9312	135.774		52.1	-851.261	767.889		52.1	-0.815918	187.252		52.1	-69.0369	172.157		52.1	-4226.51	3226.54
52.2	-33.025	26.1869		52.2	-29.6019	140.133		52.2	-832.267	771.626		52.2	0.740967	176.976		52.2	-64.6776	172.157		52.2	-4249.86	3246.16
52.3	-33.6478	26.1869		52.3	-33.3384	135.151		52.3	-816.698	765.087		52.3	1.67505	181.024		52.3	-59.0728	188.972		52.3	-4247.99	3250.83
52.4	-31.7795	28.678		52.4	-39.8774	129.546		52.4	-811.093	761.662		52.4	5.41162	182.893		52.4	-56.5817	198.313		52.4	-4243.32	3246.47
52.5	-31.7795	27.4325		52.5	-41.123	127.989		52.5	-801.752	761.35		52.5	3.23193	179.467		52.5	-53.4679	181.499		52.5	-4241.45	3227.79
52.6	-30.534	29.3007		52.6	-41.123	129.858		52.6	-792.411	781.59		52.6	0.429565	172.928		52.6	-51.5996	177.14		52.6	-4219.03	3216.27
52.7	-34.8933	24.3187		52.7	-39.5661	126.744		52.7	-788.674	784.704		52.7	0.118164	170.749		52.7	-51.5996	178.385		52.7	-4210.32	3205.99
52.8	-34.8933	26.8097		52.8	-42.3685	127.367		52.8	-787.74	786.572		52.8	-3.92981	167.635		52.8	-49.7314	173.403		52.8	-4213.74	3195.41
52.9	-37.3843	24.3187		52.9	-43.3026	132.66		52.9	-803.932	765.087		52.9	-2.6842	170.437		52.9	-52.8452	166.864		52.9	-4210.94	3197.9
53	-33.025	26.1869		53	-45.4823	135.463		53	-800.195	756.991		53	-4.24121	169.192		53	-53.7793	168.421		53	-4215.61	3177.97
53.1	-34.8933	26.1869		53.1	-38.3205	129.235		53.1	-804.554	758.548		53.1	-5.17529	172.306		53.1	-63.4321	157.834		53.1	-4211.25	3186.69
53.2	-34.8933	26.1869		53.2	-38.3205	119.582		53.2	-797.081	744.536		53.2	-6.73218	181.958		53.2	-62.498	160.325		53.2	-4205.65	3203.5
53.3	-34.8933	27.4325		53.3	-36.7636	122.696		53.3	-798.015	750.141		53.3	-0.504639	187.252		53.3	-52.8452	170.912		53.3	-4195.06	3209.73
53.4	-31.1567	26.8097		53.4	-29.9133	120.205		53.4	-802.686	765.398		53.4	0.429565	185.695		53.4	-56.8931	174.337		53.4	-4181.36	3207.55
53.5	-28.6657	26.8097		53.5	-30.2246	112.42		53.5	-802.375	778.165		53.5	5.10022	182.581		53.5	-50.3541	173.403		53.5	-4187.58	3199.14
53.6	-29.2884	25.5642		53.6	-37.075	114.289		53.6	-795.213	752.32		53.6	2.60925	181.336		53.6	-47.5517	171.846		53.6	-4193.81	3192.6
53.7	-28.6657	27.4325		53.7	-33.6498	119.582		53.7	-789.919	753.566		53.7	1.36365	186.629		53.7	-51.911	167.798		53.7	-4186.03	3195.09
53.8	-25.5519	27.4325		53.8	-32.7157	124.876		53.8	-784.315	733.015		53.8	3.54333	182.893		53.8	-45.6834	168.421		53.8	-4197.24	3198.52
53.9	-28.0429	28.678		53.9	-33.6498	122.073		53.9	-801.129	729.59		53.9	1.98645	173.551		53.9	-43.5037	172.469		53.9	-4206.89	3179.84
54	-28.0429	26.8097		54	-35.2067	112.109		54	-802.997	764.776		54	5.41162	167.635		54	-48.4858	181.499		54	-4189.76	3177.66
54.1	-28.0429	27.4325		54.1	-36.4522	98.7196		54.1	-812.339	776.608		54.1	3.85474	158.916		54.1	-50.6655	178.696		54.1	-4173.57	3186.38
54.2	-25.5519	28.0552		54.2	-36.4522	107.127		54.2	-796.77	770.069		54.2	3.23193	155.18		54.2	-52.5338	173.714		54.2	-4177.31	3196.96
54.3	-19.947	27.4325		54.3	-31.7815	119.893		54.3	-775.596	754.811		54.3	3.54333	166.389		54.3	-47.5517	180.565		54.3	-4163.61	3224.36
54.4	-19.3243	26.1869		54.4	-30.8474	127.055		54.4	-771.859	752.632		54.4	1.05237	170.126		54.4	-46.9289	193.331		54.4	-4165.79	3238.38
54.5	-21.8153	27.4325		54.5	-31.7815	129.235		54.5	-767.189	761.973		54.5	5.41162	178.844		54.5	-46.6175	192.397		54.5	-4157.38	3208.79
54.6	-20.5698	26.1869		54.6	-28.6677	134.84		54.6	-778.71	776.919		54.6	11.0165	175.108		54.6	-46.3062	186.792		54.6	-4139.01	3184.51
54.7	-21.8153	26.8097		54.7	-29.9133	140.133		54.7	-781.824	757.614		54.7	9.771	175.108		54.7	-57.2045	173.714		54.7	-4145.24	3169.56
54.8	-18.0787	26.8097		54.8	-30.536	138.888		54.8	-786.494	745.47		54.8	8.83679	171.994		54.8	-54.7134	168.421		54.8	-4141.19	3170.18
54.9	-16.8332	25.5642		54.9	-24.3084	143.87		54.9	-792.411	746.404		54.9	9.771	175.108		54.9	-50.9769	165.618		54.9	-4147.1	3174.85
55	-19.947	29.9235		55	-25.5539	134.528		55	-797.393	756.057		55	14.4417	175.108		55	-50.3541	174.649		55	-4127.18	3165.51
55.1	-21.8153	27.4325		55.1	-25.2425	125.187		55.1	-784.315	747.027		55.1	11.0165	172.617		55.1	-49.42	180.565		55.1	-4125	3151.19
55.2	-19.947	28.0552		55.2	-29.6019	122.385		55.2	-774.662	737.997		55.2	10.3937	169.192		55.2	-51.2883	182.744		55.2	-4129.04	3138.73
55.3	-21.1925	27.4325		55.3	-32.4043	117.714		55.3	-758.47	727.41		55.3	9.14819	177.599		55.3	-51.2883	182.433		55.3	-4118.15	3166.14
55.4	-20.5698	27.4325		55.4	-36.7636	129.858		55.4	-759.716	710.595		55.4	10.0824	167.946		55.4	-51.5996	177.762		55.4	-4114.72	3191.67
55.5	-22.4381	29.3007		55.5	-27.1108	129.858		55.5	-775.285	712.152		55.5	6.6571	169.192		55.5	-51.911	176.517		55.5	-4103.51	3181.08
55.6	-22.4381	24.3187		55.6	-23.6856	127.055		55.6	-783.38	714.643		55.6	10.0824	173.24		55.6	-48.7972	176.517		55.6	-4103.82	3137.49
55.7	-23.0608	23.6959		55.7	-22.4401	126.432		55.7	-785.56	716.512		55.7	8.52539	179.156		55.7	-45.0606	169.355		55.7	-4106.94	3125.34
55.8	-21.1925	26.8097		55.8	-21.506	123.319		55.8	-791.788	708.416		55.8	8.83679	175.108		55.8	-42.2582	156.277		55.8	-4107.25	3141.54
55.9	-24.9291	28.678		55.9	-23.6856	123.007		55.9	-779.644	714.643		55.9	4.78894	169.503		55.9	-37.2761	156.277		55.9	-4107.87	3162.09
56	-26.1746	27.4325		56	-25.2425	136.085		56	-783.069	698.763		56	14.7531	162.964		56	-40.3899	149.427		56	-4115.97	3167.38
56.1	-24.9291	28.0552		56.1	-19.6377	142.936		56.1	-779.644	709.661		56.1	12.5734	159.539		56.1	-43.5037	148.804		56.1	-4101.96	3163.33
56.2	-26.1746	26.1869		56.2	-20.8832	153.834		56.2	-775.285	702.811		56.2	5.72302	160.473		56.2	-41.9468	156.9		56.2	-4080.78	3174.23
56.3	-28.0429	28.678		56.3	-22.4401	149.475		56.3	-771.237	698.14		56.3	-0.193237	182.27		56.3	-36.9647	161.571		56.3	-4072.06	3176.41
56.4	-27.4202	29.9235		56.4	-24.3084	139.199		56.4	-768.746	709.661		56.4	0.429565	179.467		56.4	-37.5875	162.505		56.4	-4068.64	3175.48
56.5	-26.7974	28.678		56.5	-19.6377	138.888		56.5	-769.368	718.691		56.5	-2.06152	177.91		56.5	-33.5396	153.786		56.5	-4059.3	3161.78
56.6	-27.4202	28.678		56.6	-20.2605	144.181		56.6	-756.913	705.302		56.6	0.118164	178.222		56.6	-33.8509	150.984		56.6	-4043.42	3146.21
56.7	-28.6657	27.4325		56.7	-23.997	137.019		56.7	-758.47	685.996		56.7	5.10022	180.09		56.7	-34.1623	155.654		56.7	-4061.79	3160.22
56.8	-28.6657	26.1869		56.8	-27.1108	129.235		56.8	-762.829	695.026		56.8	5.72302	174.485		56.8	-30.4258	156.588		56.8	-4054.63	3176.72
56.9	-27.4202	28.0552		56.9	-29.6019	133.906		56.9	-763.141	698.763		56.9	6.34583	166.389		56.9	-29.1802	153.475		56.9	-4047.46	3175.48
57	-26.7974	26.1869		57	-33.0271	144.804		57	-771.548	705.925		57	-0.193237	162.964		57	-33.5396	153.163		57	-4048.09	3172.99
57.1	-28.6657	28.678		57.1	-33.6498	146.984		57.1	-764.075	705.613		57.1	-0.815918	167.946		57.1	-32.294	142.265		57.1	-4059.3	3147.45
57.2	-26.7974	24.9414		57.2	-29.9133	136.708		57.2	-767.5	708.416		57.2	-2.37292	173.863		57.2	-29.1802	142.576		57.2	-4052.13	3144.34
57.3	-28.0429	25.5642		57.3	-28.6677	134.528		57.3	-760.027	710.284		57.3	-2.6842	180.402		57.3	-28.8688	141.019		57.3	-4047.46	3155.55
57.4	-25.5519	26.1869		57.4	-28.6677	142.313		57.4	-749.751	712.464		57.4	-3.30701	172.617		57.4	-34.4737	148.804		57.4	-4034.7	3168
57.5	-24.3063	26.8097		57.5	-25.8653	139.199		57.5	-744.458	717.134		57.5	1.36365	164.521		57.5	-36.342	150.672		57.5	-4037.5	3169.87
57.6	-26.7974	28.0552		57.6	-26.1767	128.301		57.6	-757.536	719.003		57.6	3.85474	167.946		57.6	-33.8509	150.672		57.6	-4032.83	3164.89
57.7	-27.4202	27.4325		57.7	-26.1767	124.253		57.7	-772.171	724.919		57.7	0.740967	171.372		57.7	-31.6713	158.457		57.7	-4020.06	3155.86
57.8	-30.534	28.0552		57.8	-28.9791	118.648		57.8	-760.961	706.236		57.8	1.67505	170.437		57.8	-36.6534	166.241		57.8	-4019.13	3143.09
57.9	-24.3063	28.0552		57.9	-24.3084	125.81		57.9	-751.62	694.715		57.9	1.67505	176.665		57.9	-31.3599	159.702		57.9	-4026.91	3126.28
58	-23.0608	26.8097		58	-23.0629	130.48		58	-748.817	704.991		58	2.92065	166.701		58	-30.1144	159.391		58	-4009.79	3119.43
58.1	-24.9291	28.0552		58.1	-25.5539	138.576		58.1	-745.703	705.613		58.1	1.36365	169.503		58.1	-31.6713	159.702		58.1	-3979.27	3114.14
58.2	-23.6836	29.9235		58.2	-18.0808	133.906		58.2	-757.224	707.482		58.2	0.118164	170.437		58.2	-34.1623	150.672		58.2	-3968.37	3120.05
58.3	-22.4381	27.4325		58.3	-13.7215	135.774		58.3	-765.009	721.805		58.3	-1.43872	166.389		58.3	-31.3599	150.361		58.3	-3965.26	3153.06
58.4	-26.1746	26.8097		58.4	-18.0808	133.906		58.4	-760.338	707.793		58.4	-0.193237	172.306		58.4	-31.9827	153.475		58.4	-3980.83	3153.99
58.5	-25.5519	26.1869		58.5	-15.5898	137.019		58.5	-764.075	696.583		58.5	-1.12732	172.617		58.5	-31.9827	142.265		58.5	-3990.17	3151.19
58.6	-24.3063	28.0552		58.6	-23.0629	140.445		58.6	-757.847	713.709		58.6	3.54333	175.419		58.6	-30.4258	141.642		58.6	-3995.15	3131.26
58.7	-23.0608	29.3007		58.7	-23.3743	142.313		58.7	-759.404	730.835		58.7	9.14819	171.06		58.7	-30.4258	141.331		58.7	-3987.68	3118.18
58.8	-22.4381	26.8097		58.8	-23.3743	139.822		58.8	-755.356	733.015		58.8	8.21411	171.683		58.8	-32.294	133.546		58.8	-3981.45	3129.7
58.9	-25.5519	27.4325		58.9	-21.1946	134.217		58.9	-748.506	726.787		58.9	6.34583	168.569		58.9	-31.3599	129.498		58.9	-3994.84	3129.7
59	-23.6836	28.0552		59	-25.5539	134.217		59	-743.835	712.152		59	3.54333	176.976		59	-25.755	127.007		59	-3984.88	3130.33
59.1	-24.3063	26.1869		59.1	-25.2425	137.954		59.1	-742.59	717.134		59.1	-1.75012	178.533		59.1	-22.9526	138.528		59.1	-3962.77	3133.44
59.2	-25.5519	26.1869		59.2	-29.9133	147.918		59.2	-737.296	717.757		59.2	-3.61841	176.976		59.2	-28.5575	146.624		59.2	-3937.55	3125.34
59.3	-26.1746	26.8097		59.3	-24.6198	153.523		59.3	-737.919	713.398		59.3	-0.504639	163.898		59.3	-28.2461	141.331		59.3	-3915.75	3115.69
59.4	-24.9291	26.1869		59.4	-23.3743	145.738		59.4	-732.937	714.643		59.4	-0.193237	171.683		59.4	-29.1802	134.169		59.4	-3919.8	3108.53
59.5	-26.1746	28.678		59.5	-23.6856	144.493		59.5	-732.625	711.841		59.5	0.429565	187.563		59.5	-22.3299	134.48		59.5	-3908.9	3122.85
59.6	-21.1925	29.3007		59.6	-25.5539	152.277		59.6	-743.524	723.362		59.6	-0.815918	189.12		59.6	-27.0006	137.906		59.6	-3928.83	3132.2
59.7	-23.6836	29.9235		59.7	-18.3922	162.553		59.7	-747.26	714.955		59.7	-0.504639	186.318		59.7	-34.4737	136.349		59.7	-3925.4	3146.83
59.8	-26.1746	28.678		59.8	-21.8174	165.666		59.8	-749.129	705.613		59.8	-1.12732	183.515		59.8	-33.2282	133.546		59.8	-3922.91	3142.16
59.9	-28.6657	28.0552		59.9	-27.1108	165.355		59.9	-757.536	703.122		59.9	2.60925	175.419		59.9	-32.9168	131.367		59.9	-3908.9	3130.02
60	-25.5519	28.0552		60	-20.2605	151.654		60	-747.572	701.254		60	-3.61841	166.389		60	-37.2761	148.493		60	-3913.88	3134.69
60.1	-21.1925	29.3007		60.1	-18.3922	142.002		60.1	-742.278	709.661		60.1	-5.17529	170.749		60.1	-41.6355	158.145		60.1	-3920.42	3143.09
60.2	-24.3063	28.678		60.2	-23.0629	140.133		60.2	-739.164	714.021		60.2	-4.55249	176.042		60.2	-52.8452	159.702		60.2	-3915.13	3159.91
60.3	-25.5519	28.678		60.3	-19.6377	137.954		60.3	-732.625	714.332		60.3	-3.92981	178.533		60.3	-52.5338	141.019		60.3	-3922.6	3157.11
60.4	-22.4381	27.4325		60.4	-22.7515	127.678		60.4	-739.787	697.829		60.4	-2.37292	175.108		60.4	-43.1924	127.941		60.4	-3924.78	3107.6
60.5	-24.9291	28.678		60.5	-21.8174	133.283		60.5	-747.26	696.272		60.5	-3.92981	170.126		60.5	-36.9647	131.055		60.5	-3931.94	3089.85
60.6	-23.6836	28.678		60.6	-23.3743	137.019		60.6	-744.769	690.356		60.6	-4.55249	178.222		60.6	-45.6834	121.714		60.6	-3903.92	3131.88
60.7	-23.6836	26.8097		60.7	-24.6198	125.498		60.7	-738.23	695.338		60.7	-5.48669	171.06		60.7	-43.8151	117.354		60.7	-3904.85	3114.14
60.8	-26.1746	26.8097		60.8	-20.2605	121.139		60.8	-732.625	709.661		60.8	-2.06152	167.635		60.8	-43.8151	133.235		60.8	-3911.7	3093.58
60.9	-22.4381	25.5642		60.9	-23.3743	134.217		60.9	-728.266	694.715		60.9	4.47754	170.126		60.9	-47.5517	123.582		60.9	-3890.22	3105.1
61	-22.4381	26.1869		61	-25.5539	140.445		61	-725.775	696.583		61	1.36365	176.354		61	-47.5517	114.863		61	-3882.43	3116.31
61.1	-27.4202	27.4325		61.1	-22.4401	141.69		61.1	-728.266	690.978		61.1	3.23193	178.844		61.1	-45.6834	115.486		61.1	-3888.35	3104.79
61.2	-26.1746	29.3007		61.2	-21.506	137.019		61.2	-727.643	695.026		61.2	2.60925	174.485		61.2	-42.2582	108.013		61.2	-3903.92	3107.28
61.3	-24.9291	29.9235		61.3	-20.2605	134.217		61.3	-722.039	710.595		61.3	-0.815918	173.863		61.3	-40.3899	107.702		61.3	-3894.26	3104.48
61.4	-26.7974	27.4325		61.4	-19.3263	132.66		61.4	-716.122	711.841		61.4	-2.37292	178.533		61.4	-39.1444	109.881		61.4	-3910.77	3088.29
61.5	-26.7974	28.678		61.5	-21.1946	140.445		61.5	-700.865	722.739		61.5	-2.99561	178.844		61.5	-41.6355	108.324		61.5	-3908.59	3109.46
61.6	-28.0429	27.4325		61.6	-27.7336	136.085		61.6	-717.056	709.661		61.6	-6.1095	180.402		61.6	-36.342	111.75		61.6	-3889.9	3110.4
61.7	-29.2884	25.5642		61.7	-25.2425	137.642		61.7	-727.643	704.056		61.7	-5.17529	176.976		61.7	-36.9647	117.354		61.7	-3872.78	3114.76
61.8	-28.0429	24.9414		61.8	-15.9011	139.199		61.8	-728.578	702.811		61.8	-3.61841	176.665		61.8	-41.6355	112.995		61.8	-3877.14	3104.48
61.9	-29.2884	26.8097		61.9	-13.0987	142.624		61.9	-732.625	708.104		61.9	-0.815918	170.749		61.9	-45.9948	114.241		61.9	-3877.45	3090.78
62	-29.9112	27.4325		62	-13.4101	146.672		62	-718.302	720.248		62	7.27991	176.665		62	-38.833	111.438		62	-3863.44	3092.03
62.1	-24.9291	26.1869		62.1	-10.919	139.822		62.1	-712.074	710.284		62.1	11.6393	190.054		62.1	-31.0485	108.947		62.1	-3864.99	3093.27
62.2	-23.6836	28.0552		62.2	-15.2784	131.103		62.2	-713.943	714.955		62.2	5.10022	186.629		62.2	-31.0485	110.504		62.2	-3849.11	3076.77
62.3	-26.1746	28.0552		62.3	-20.2605	137.642		62.3	-719.236	712.775		62.3	5.41162	187.563		62.3	-37.2761	105.522		62.3	-3854.72	3060.27
62.4	-26.7974	27.4325		62.4	-17.7694	143.558		62.4	-718.613	701.254		62.4	4.78894	192.234		62.4	-41.6355	105.522		62.4	-3855.34	3064.94
62.5	-24.9291	24.3187		62.5	-11.8532	149.475		62.5	-721.416	684.128		62.5	6.03442	184.138		62.5	-37.5875	102.097		62.5	-3858.46	3048.75
62.6	-26.7974	24.9414		62.6	-14.6556	149.475		62.6	-716.745	662.643		62.6	8.83679	190.989		62.6	-37.2761	99.6058		62.6	-3852.23	3062.76
62.7	-26.1746	29.9235		62.7	-20.2605	142.624		62.7	-717.368	671.984		62.7	9.14819	195.036		62.7	-38.2103	96.492		62.7	-3861.26	3068.98
62.8	-26.1746	28.0552		62.8	-14.6556	138.265		62.8	-715.811	666.691		62.8	7.59131	183.515		62.8	-37.5875	94.9351		62.8	-3882.12	3071.48
62.9	-21.8153	26.8097		62.9	-15.9011	142.313		62.9	-718.613	676.966		62.9	9.45959	177.91		62.9	-34.1623	97.7375		62.9	-3873.71	3072.72
63	-23.0608	28.0552		63	-19.6377	140.756		63	-712.697	671.984		63	6.6571	167.946		63	-33.8509	97.4261		63	-3855.34	3063.38
63.1	-27.4202	29.9235		63.1	-12.7873	147.295		63.1	-704.601	664.2		63.1	6.03442	154.246		63.1	-35.4078	100.851		63.1	-3844.13	3075.84
63.2	-23.6836	27.4325		63.2	-13.0987	154.457		63.2	-703.978	664.511		63.2	5.72302	162.341		63.2	-35.4078	104.277		63.2	-3846	3078.95
63.3	-26.1746	26.1869		63.3	-16.2125	152.9		63.3	-699.308	692.535		63.3	5.41162	167.012		63.3	-34.1623	101.163		63.3	-3845.69	3052.79
63.4	-26.1746	28.678		63.4	-19.0149	142.313		63.4	-706.781	701.254		63.4	1.36365	165.144		63.4	-33.8509	103.031		63.4	-3857.83	3065.87
63.5	-24.3063	22.4504		63.5	-22.1287	136.397		63.5	-713.008	696.272		63.5	1.36365	176.354		63.5	-35.4078	94.0009		63.5	-3850.67	3074.9
63.6	-25.5519	28.0552		63.6	-20.5718	142.002		63.6	-715.188	695.961		63.6	2.92065	182.581		63.6	-36.9647	101.785		63.6	-3846.93	3051.55
63.7	-26.1746	28.0552		63.7	-18.3922	147.918		63.7	-707.404	691.29		63.7	2.29785	188.186		63.7	-39.7672	96.8034		63.7	-3848.18	3031.62
63.8	-27.4202	24.9414		63.8	-22.4401	141.69		63.8	-705.224	693.158		63.8	6.6571	191.923		63.8	-41.6355	98.3603		63.8	-3856.28	3029.13
63.9	-26.7974	29.3007		63.9	-21.8174	135.463		63.9	-709.583	690.356		63.9	5.72302	199.396		63.9	-37.8989	104.588		63.9	-3841.02	3056.53
64	-27.4202	25.5642		64	-19.3263	138.265		64	-717.991	699.697		64	0.740967	203.132		64	-43.1924	107.702		64	-3824.83	3065.87
64.1	-27.4202	25.5642		64.1	-14.967	142.313		64.1	-716.122	693.158		64.1	1.05237	209.049		64.1	-40.0786	109.259		64.1	-3822.02	3037.85
64.2	-29.2884	29.3007		64.2	-24.6198	137.331		64.2	-706.781	681.948		64.2	3.54333	207.492		64.2	-38.5216	107.39		64.2	-3824.83	3033.18
64.3	-32.4022	26.8097		64.3	-25.8653	130.792		64.3	-703.978	690.356		64.3	6.03442	198.462		64.3	-36.342	106.145		64.3	-3829.5	3049.06
64.4	-31.7795	25.5642		64.4	-24.3084	124.253		64.4	-706.469	692.535		64.4	1.36365	198.462		64.4	-36.6534	109.881		64.4	-3817.98	3082.37
64.5	-29.2884	26.1869		64.5	-15.9011	123.63		64.5	-707.715	692.847		64.5	-6.1095	195.036		64.5	-30.1144	111.438		64.5	-3816.73	3096.07
64.6	-28.6657	28.0552		64.6	-13.4101	128.924		64.6	-703.667	689.422		64.6	-3.92981	194.414		64.6	-25.4437	108.947		64.6	-3822.96	3085.18
64.7	-27.4202	24.9414		64.7	-17.7694	144.804		64.7	-702.422	699.074		64.7	-3.92981	192.545		64.7	-27.9347	107.702		64.7	-3822.34	3064
64.8	-27.4202	29.9235		64.8	-21.1946	149.163		64.8	-703.667	704.368		64.8	-8.28906	187.252		64.8	-34.4737	117.666		64.8	-3822.96	3050.92
64.9	-29.2884	24.9414		64.9	-24.3084	134.528		64.9	-710.206	692.224		64.9	-7.66638	175.419		64.9	-32.9168	125.139		64.9	-3820.78	3067.74
65	-27.4202	28.0552		65	-21.506	127.678		65	-710.517	697.517		65	-0.815918	175.108		65	-28.5575	121.714		65	-3830.43	3037.85
65.1	-28.0429	28.0552		65.1	-23.6856	138.576		65.1	-715.811	698.14		65.1	0.740967	182.893		65.1	-26.6892	116.109		65.1	-3837.59	3032.55
65.2	-26.1746	23.6959		65.2	-30.8474	140.756		65.2	-713.008	693.781		65.2	1.98645	180.402		65.2	-27.3119	117.354		65.2	-3832.61	3034.11
65.3	-24.3063	24.3187		65.3	-31.4702	135.151		65.3	-698.374	675.098		65.3	-6.73218	185.384		65.3	-22.0185	119.223		65.3	-3803.65	3023.83
65.4	-24.9291	27.4325		65.4	-28.9791	126.121		65.4	-690.589	671.05		65.4	-2.99561	193.791		65.4	-19.8388	108.947		65.4	-3780.61	3031.93
65.5	-26.7974	26.8097		65.5	-19.3263	114.289		65.5	-698.685	680.08		65.5	1.05237	191.3		65.5	-23.8868	107.39		65.5	-3781.54	3051.86
65.6	-25.5519	28.0552		65.6	-15.5898	110.552		65.6	-702.422	677.9		65.6	-5.17529	182.27		65.6	-23.5754	109.259		65.6	-3796.49	3047.81
65.7	-23.6836	27.4325		65.7	-18.7036	105.57		65.7	-699.619	681.014		65.7	-3.92981	179.467		65.7	-23.264	110.193		65.7	-3814.86	3022.28
65.8	-24.9291	26.8097		65.8	-16.5239	106.815		65.8	-702.422	677.589		65.8	-5.48669	185.695		65.8	-25.4437	110.193		65.8	-3820.78	3029.75
65.9	-27.4202	29.3007		65.9	-22.7515	98.0969		65.9	-699.308	683.505		65.9	-0.504639	197.216		65.9	-26.3778	112.684		65.9	-3799.6	3050.3
66	-26.7974	26.8097		66	-22.7515	103.079		66	-684.05	675.721		66	0.429565	198.773		66	-26.0664	113.307		66	-3802.72	3049.99
66.1	-24.3063	26.8097		66.1	-19.3263	105.881		66.1	-678.445	674.475		66.1	-7.04358	193.168		66.1	-29.803	106.456		66.1	-3798.98	3044.07
66.2	-24.9291	24.9414		66.2	-19.6377	104.947		66.2	-674.086	688.176		66.2	-5.17529	191.923		66.2	-29.803	102.72		66.2	-3799.92	3042.21
66.3	-22.4381	24.9414		66.3	-24.9312	115.223		66.3	-685.918	676.032		66.3	-2.06152	186.318		66.3	-25.4437	104.588		66.3	-3789.33	3043.45
66.4	-21.8153	26.1869		66.4	-23.997	120.828		66.4	-691.835	671.361		66.4	-1.12732	189.12		66.4	-27.3119	105.522		66.4	-3787.77	3043.14
66.5	-22.4381	29.3007		66.5	-25.8653	114.289		66.5	-690.278	678.523		66.5	-1.43872	182.581		66.5	-26.6892	108.947		66.5	-3792.44	3049.37
66.6	-21.8153	24.9414		66.6	-26.1767	110.241		66.6	-693.391	689.733		66.6	-2.6842	185.072		66.6	-29.4916	117.354		66.6	-3793.69	3039.4
66.7	-21.8153	24.9414		66.7	-18.3922	108.684		66.7	-687.787	676.966		66.7	0.118164	183.515		66.7	-32.294	118.911		66.7	-3775.63	3016.67
66.8	-24.3063	26.1869		66.8	-11.8532	111.486		66.8	-713.008	671.05		66.8	1.36365	196.282		66.8	-36.0306	122.025		66.8	-3763.8	3007.95
66.9	-26.7974	26.1869		66.9	-14.6556	109.929		66.9	-718.613	664.822		66.9	1.67505	197.216		66.9	-39.1444	118.911		66.9	-3778.43	3010.45
67	-27.4202	25.5642		67	-12.1646	112.42		67	-708.649	663.888		67	3.23193	198.15		67	-27.9347	115.486		67	-3784.35	3009.2
67.1	-24.9291	24.3187		67.1	-13.4101	104.636		67.1	-708.338	670.427		67.1	3.85474	196.905		67.1	-29.1802	107.702		67.1	-3757.88	3010.45
67.2	-23.6836	26.1869		67.2	-12.1646	99.3424		67.2	-703.978	659.84		67.2	4.16614	201.575		67.2	-32.9168	106.768		67.2	-3744.8	3013.25
67.3	-29.2884	26.8097		67.3	-15.5898	99.9651		67.3	-705.535	677.278		67.3	10.7051	203.755		67.3	-29.1802	99.9172		67.3	-3741.69	3023.21
67.4	-26.1746	29.3007		67.4	-13.0987	104.947		67.4	-695.571	674.787		67.4	14.7531	193.168		67.4	-27.3119	101.163		67.4	-3738.26	3026.01
67.5	-25.5519	27.4325		67.5	-11.2304	106.815		67.5	-681.87	676.655		67.5	11.9507	196.593		67.5	-26.3778	108.013		67.5	-3738.89	3027.88
67.6	-26.1746	27.4325		67.6	-14.6556	103.079		67.6	-674.397	674.164		67.6	11.9507	198.462		67.6	-22.3299	107.39		67.6	-3734.21	3022.9
67.7	-27.4202	26.8097		67.7	-14.3442	105.57		67.7	-680.936	660.463		67.7	7.59131	197.839		67.7	-19.8388	108.636		67.7	-3734.21	3029.75
67.8	-26.7974	26.8097		67.8	-14.6556	113.043		67.8	-670.972	655.17		67.8	10.3937	196.282		67.8	-15.7909	109.259		67.8	-3745.74	3029.13
67.9	-28.6657	22.4504		67.9	-17.1467	122.385		67.9	-669.104	655.17		67.9	14.4417	189.432		67.9	-19.216	113.307		67.9	-3747.92	3016.67
68	-26.1746	23.6959		68	-12.7873	119.893		68	-674.086	660.775		68	6.03442	183.204		68	-21.0843	108.947		68	-3737.02	3014.18
68.1	-27.4202	25.5642		68.1	-15.5898	113.043		68.1	-675.643	661.086		68.1	8.21411	177.599		68.1	-17.6591	98.0489		68.1	-3738.26	2995.5
68.2	-24.9291	25.5642		68.2	-19.6377	113.666		68.2	-667.858	683.817		68.2	6.34583	186.006		68.2	-12.6771	94.6237		68.2	-3725.5	2987.71
68.3	-24.9291	23.6959		68.3	-14.3442	115.846		68.3	-674.086	690.356		68.3	7.90271	189.432		68.3	-9.87463	93.6896		68.3	-3723.32	2961.87
68.4	-24.3063	25.5642		68.4	-8.42799	113.043		68.4	-675.331	675.098		68.4	8.83679	194.725		68.4	-16.4136	92.1327		68.4	-3734.21	2968.72
68.5	-26.7974	28.0552		68.5	-6.24833	115.534		68.5	-662.565	678.835		68.5	6.03442	193.791		68.5	-22.0185	86.5278		68.5	-3736.71	2988.96
68.6	-25.5519	26.8097		68.6	-9.36213	122.696		68.6	-662.565	667.625		68.6	6.34583	197.527		68.6	-23.8868	97.7375		68.6	-3729.54	3006.71
68.7	-23.0608	24.3187		68.7	-9.67351	117.402		68.7	-660.697	663.888		68.7	2.29785	196.905		68.7	-30.1144	106.456		68.7	-3735.46	3012
68.8	-23.6836	26.1869		68.8	-10.2963	120.205		68.8	-661.631	674.164		68.8	5.41162	189.432		68.8	-34.4737	106.456		68.8	-3725.5	3001.42
68.9	-21.8153	25.5642		68.9	-13.4101	119.582		68.9	-662.565	675.721		68.9	9.45959	195.97		68.9	-34.7851	100.851		68.9	-3696.54	2985.22
69	-21.8153	24.3187		69	-13.7215	117.091		69	-664.122	657.661		69	13.1962	198.462		69	-40.3899	98.983		69	-3689.38	2975.26
69.1	-24.9291	26.8097		69.1	-18.3922	122.073		69.1	-662.876	656.104		69.1	11.6393	199.396		69.1	-43.1924	104.588		69.1	-3702.77	2990.21
69.2	-21.8153	25.5642		69.2	-13.4101	125.498		69.2	-663.81	646.762		69.2	10.7051	195.659		69.2	-29.803	102.408		69.2	-3718.02	3010.13
69.3	-23.0608	26.1869		69.3	-5.93695	126.121		69.3	-669.415	642.714		69.3	11.3279	196.282		69.3	-32.6054	97.1147		69.3	-3730.79	3029.44
69.4	-20.5698	25.5642		69.4	-12.1646	122.385		69.4	-661.631	642.092		69.4	4.47754	195.659		69.4	-38.5216	105.522		69.4	-3725.18	3008.89
69.5	-20.5698	24.9414		69.5	-11.5418	114.289		69.5	-660.074	667.313		69.5	4.47754	191.611		69.5	-36.9647	106.768		69.5	-3714.91	2998.61
69.6	-21.1925	28.0552		69.6	-9.9849	108.995		69.6	-666.924	670.116		69.6	7.27991	192.545		69.6	-33.8509	95.8692		69.6	-3723.94	2986.16
69.7	-24.3063	28.0552		69.7	-10.919	105.881		69.7	-658.206	655.481		69.7	4.47754	202.51		69.7	-34.4737	90.5758		69.7	-3724.87	2977.44
69.8	-22.4381	28.678		69.8	-10.919	114.911		69.8	-655.714	648.942		69.8	0.118164	207.803		69.8	-31.6713	90.8871		69.8	-3726.43	2979.31
69.9	-21.1925	21.8276		69.9	-13.4101	132.037		69.9	-659.14	643.337		69.9	3.23193	209.36		69.9	-29.803	90.2644		69.9	-3724.56	2997.06
70	-21.1925	21.8276		70	-18.3922	129.235		70	-638.589	631.505		70	6.6571	217.767		70	-33.2282	91.1985		70	-3709.62	2992.7
70.1	-18.7015	26.1869		70.1	-21.506	128.612		70.1	-643.571	628.702		70.1	8.83679	216.21		70.1	-29.4916	91.5099		70.1	-3713.66	2966.23
70.2	-20.5698	25.5642		70.2	-19.0149	119.893		70.2	-655.403	629.636		70.2	9.14819	214.342		70.2	-30.1144	94.6237		70.2	-3708.37	2964.98
70.3	-20.5698	27.4325		70.3	-15.2784	111.798		70.3	-662.876	639.912		70.3	7.90271	205.623		70.3	-25.4437	107.079		70.3	-3688.44	2972.46
70.4	-17.456	26.1869		70.4	-12.1646	113.354		70.4	-659.762	633.373		70.4	10.0824	209.671		70.4	-19.5274	105.833		70.4	-3669.14	2955.95
70.5	-18.0787	25.5642		70.5	-11.2304	111.798		70.5	-646.062	639.912		70.5	5.41162	216.21		70.5	-22.6412	108.013		70.5	-3670.38	2950.35
70.6	-20.5698	24.9414		70.6	-12.1646	104.013		70.6	-653.846	633.373		70.6	9.14819	218.079		70.6	-23.8868	105.522		70.6	-3678.17	2961.25
70.7	-19.947	24.3187		70.7	-9.67351	105.881		70.7	-653.846	643.649		70.7	13.819	221.504		70.7	-27.0006	108.324		70.7	-3691.24	2967.16
70.8	-20.5698	24.3187		70.8	-9.67351	97.4741		70.8	-653.223	636.798		70.8	14.1302	217.456		70.8	-26.6892	105.522		70.8	-3685.33	2964.67
70.9	-21.1925	25.5642		70.9	-10.2963	100.588		70.9	-650.732	633.062		70.9	15.9985	223.372		70.9	-24.1981	101.785		70.9	-3683.15	2969.65
71	-20.5698	24.3187		71	-10.6077	96.8513		71	-651.978	643.96		71	18.1782	228.977		71	-24.5095	90.5758		71	-3689.69	2967.47
71.1	-18.0787	28.0552		71.1	-6.87109	95.6058		71.1	-652.912	648.942		71.1	15.6873	228.977		71.1	-31.3599	85.5937		71.1	-3693.42	2970.28
71.2	-19.3243	28.0552		71.2	-10.6077	89.6896		71.2	-653.223	652.056		71.2	15.0645	231.156		71.2	-29.803	76.875		71.2	-3683.77	2983.04
71.3	-20.5698	26.1869		71.3	-6.87109	90.9351		71.3	-655.092	649.876		71.3	11.9507	231.156		71.3	-29.803	74.0726		71.3	-3701.21	2975.26
71.4	-22.4381	25.5642		71.4	-11.5418	96.54		71.4	-661.008	636.175		71.4	13.5076	237.073		71.4	-27.9347	85.5937		71.4	-3709.62	2983.04
71.5	-22.4381	24.9414		71.5	-12.4759	90.9351		71.5	-670.038	650.81		71.5	15.0645	239.252		71.5	-28.2461	98.983		71.5	-3694.67	2970.59
71.6	-22.4381	26.1869		71.6	-15.2784	84.0847		71.6	-670.972	648.631		71.6	13.819	234.893		71.6	-27.6233	97.7375		71.6	-3694.36	2966.23
71.7	-21.1925	26.8097		71.7	-14.3442	90.001		71.7	-662.253	640.846		71.7	14.1302	233.648		71.7	-24.1981	93.0668		71.7	-3713.04	2956.58
71.8	-18.7015	27.4325		71.8	-10.919	99.6537		71.8	-660.385	646.14		71.8	9.45959	227.42		71.8	-25.1323	92.1327		71.8	-3729.23	2967.79
71.9	-19.947	24.9414		71.9	-5.93695	89.6896		71.9	-657.583	649.253		71.9	12.262	222.438		71.9	-26.0664	91.8213		71.9	-3696.23	2954.4
72	-22.4381	24.9414		72	-3.13452	100.899		72	-649.798	661.086		72	17.5555	217.767		72	-30.4258	94.3123		72	-3676.92	2934.78
72.1	-22.4381	28.0552		72.1	-4.69143	112.109		72.1	-656.026	640.535		72.1	19.1124	222.749		72.1	-25.4437	111.127		72.1	-3673.18	2941.01
72.2	-19.3243	25.5642		72.2	-3.44591	108.061		72.2	-652.289	638.355		72.2	20.0465	229.6		72.2	-22.6412	108.013		72.2	-3657.61	2962.8
72.3	-23.6836	27.4325		72.3	-3.75728	104.636		72.3	-633.918	642.714		72.3	16.6213	213.719		72.3	-31.3599	97.1147		72.3	-3670.38	2964.98
72.4	-22.4381	27.4325		72.4	-3.75728	108.372		72.4	-625.822	648.319		72.4	12.8848	209.36		72.4	-33.2282	96.8034		72.4	-3680.03	2964.67
72.5	-20.5698	25.5642		72.5	-4.69143	113.043		72.5	-625.199	640.223		72.5	15.3759	209.983		72.5	-36.9647	93.6896		72.5	-3669.76	2938.83
72.6	-21.8153	22.4504		72.6	-6.55971	113.354		72.6	-630.181	635.864		72.6	12.5734	212.162		72.6	-35.4078	96.1806		72.6	-3680.97	2928.86
72.7	-25.5519	26.8097		72.7	-3.44591	117.714		72.7	-626.445	643.649		72.7	11.6393	216.522		72.7	-35.7192	99.9172		72.7	-3682.53	2922.64
72.8	-23.6836	26.8097		72.8	-5.31418	120.205		72.8	-623.019	657.972		72.8	14.4417	214.031		72.8	-28.8688	87.4619		72.8	-3676.92	2918.59
72.9	-22.4381	25.5642		72.9	-8.73937	112.732		72.9	-633.295	667.002		72.9	16.9327	222.438		72.9	-31.6713	92.1327		72.9	-3692.49	2936.34
73	-27.4202	27.4325		73	-10.919	105.259		73	-636.72	652.679		73	15.6873	225.24		73	-29.4916	102.408		73	-3693.11	2960.62
73.1	-28.0429	26.8097		73.1	-10.2963	100.899		73.1	-628.936	643.649		73.1	10.3937	230.222		73.1	-27.9347	108.947		73.1	-3686.26	2965.92
73.2	-24.3063	24.9414		73.2	-9.05076	95.2944		73.2	-621.151	640.846		73.2	14.4417	228.977		73.2	-23.5754	99.9172		73.2	-3680.97	2949.41
73.3	-21.8153	26.1869		73.3	-9.05076	88.1327		73.3	-616.792	632.439		73.3	15.9985	218.079		73.3	-25.1323	112.061		73.3	-3670.69	2950.97
73.4	-22.4381	24.3187		73.4	-5.31418	82.5278		73.4	-622.085	626.211		73.4	15.9985	214.031		73.4	-23.264	108.947		73.4	-3660.42	2949.1
73.5	-19.947	26.8097		73.5	-2.20038	76.3002		73.5	-623.642	625.9		73.5	13.1962	219.324		73.5	-23.5754	103.654		73.5	-3667.58	2945.99
73.6	-21.1925	24.3187		73.6	-2.20038	79.7254		73.6	-622.085	631.505		73.6	14.1302	228.043		73.6	-22.6412	98.6716		73.6	-3661.04	2950.35
73.7	-24.3063	26.8097		73.7	-3.13452	71.9409		73.7	-617.415	638.355		73.7	13.819	231.779		73.7	-28.5575	109.259		73.7	-3654.5	2936.03
73.8	-21.1925	26.8097		73.8	-1.57762	75.0547		73.8	-619.906	622.163		73.8	12.5734	227.109		73.8	-33.2282	119.534		73.8	-3640.18	2933.85
73.9	-20.5698	28.0552		73.9	-1.26624	88.1327		73.9	-619.594	614.69		73.9	14.7531	229.288		73.9	-35.7192	103.654		73.9	-3628.03	2943.19
74	-20.5698	24.3187		74	-0.0207195	91.8693		74	-609.63	615.002		74	8.83679	223.995		74	-27.9347	98.6716		74	-3627.41	2938.21
74.1	-20.5698	24.9414		74.1	1.22481	92.492		74.1	-611.187	619.984		74.1	9.45959	228.977		74.1	-26.6892	103.031		74.1	-3642.05	2919.83
74.2	-21.8153	27.4325		74.2	5.58413	99.6537		74.2	-618.66	612.51		74.2	11.0165	225.552		74.2	-29.4916	99.6058		74.2	-3636.44	2932.91
74.3	-18.0787	28.0552		74.3	0.602045	102.768		74.3	-617.103	612.822		74.3	8.83679	232.402		74.3	-30.4258	100.54		74.3	-3637.38	2938.83
74.4	-17.456	23.6959		74.4	0.913424	99.031		74.4	-616.48	612.822		74.4	12.8848	235.516		74.4	-35.4078	96.1806		74.4	-3646.41	2933.53
74.5	-19.947	24.9414		74.5	-5.93695	90.6237		74.5	-610.876	615.313		74.5	15.6873	235.205		74.5	-29.4916	94.9351		74.5	-3642.36	2921.7
74.6	-18.0787	24.9414		74.6	-7.18247	86.5758		74.6	-612.744	610.642		74.6	16.6213	227.731		74.6	-34.7851	102.408		74.6	-3647.65	2923.88
74.7	-17.456	25.5642		74.7	-9.9849	77.8571		74.7	-613.367	615.624		74.7	14.1302	224.929		74.7	-37.2761	103.031		74.7	-3661.97	2915.47
74.8	-18.0787	24.9414		74.8	-9.05076	80.0368		74.8	-618.037	624.654		74.8	8.21411	229.911		74.8	-27.9347	93.0668		74.8	-3661.66	2925.75
74.9	-21.1925	23.6959		74.9	-5.62557	94.0489		74.9	-615.235	629.014		74.9	4.47754	234.27		74.9	-29.1802	85.2823		74.9	-3643.6	2947.24
75	-19.947	27.4325		75	-9.05076	106.193		75	-603.714	634.93		75	10.7051	234.27		75	-35.0965	90.8871		75	-3628.03	2943.19
75.1	-18.7015	26.1869		75.1	-8.42799	100.277		75.1	-610.253	622.475		75.1	18.801	231.779		75.1	-39.1444	91.5099		75.1	-3633.33	2928.55
75.2	-18.7015	26.1869		75.2	-5.31418	94.983		75.2	-619.283	625.277		75.2	18.1782	230.222		75.2	-40.3899	88.7075		75.2	-3631.77	2928.86
75.3	-20.5698	28.678		75.3	-5.93695	93.4261		75.3	-616.169	603.792		75.3	15.9985	231.156		75.3	-38.5216	84.6595		75.3	-3636.75	2935.09
75.4	-19.947	26.1869		75.4	-5.62557	92.1806		75.4	-616.169	613.133		75.4	11.3279	227.42		75.4	-32.9168	80.923		75.4	-3643.91	2936.96
75.5	-21.8153	24.3187		75.5	-1.889	90.001		75.5	-619.594	615.002		75.5	15.0645	229.911		75.5	-33.5396	81.8571		75.5	-3615.89	2944.43
75.6	-23.6836	27.4325		75.6	-5.00281	90.9351		75.6	-614.612	608.774		75.6	13.819	236.45		75.6	-33.5396	78.7433		75.6	-3618.07	2927.62
75.7	-21.8153	25.5642		75.7	-6.87109	90.001		75.7	-613.678	605.971		75.7	13.1962	233.336		75.7	-37.5875	77.8092		75.7	-3629.9	2922.01
75.8	-20.5698	24.3187		75.8	-3.75728	99.3424		75.8	-611.498	583.241		75.8	12.8848	231.156		75.8	-40.7013	83.414		75.8	-3624.61	2922.01
75.9	-19.3243	23.0731		75.9	-7.18247	104.013		75.9	-613.367	578.259		75.9	10.3937	229.288		75.9	-38.5216	84.9709		75.9	-3621.18	2900.84
76	-15.5877	26.8097		76	-9.05076	101.211		76	-609.63	597.253		76	15.3759	234.582		76	-40.0786	83.7254		76	-3632.7	2902.4
76.1	-18.0787	27.4325		76.1	-8.73937	104.947		76.1	-623.331	612.199		76.1	17.5555	230.222		76.1	-38.833	80.6116		76.1	-3630.84	2891.5
76.2	-20.5698	27.4325		76.2	-9.67351	101.833		76.2	-622.397	625.589		76.2	14.7531	226.175		76.2	-30.4258	75.9409		76.2	-3609.04	2899.28
76.3	-21.1925	26.1869		76.3	-9.67351	100.899		76.3	-618.971	612.822		76.3	16.3099	224.306		76.3	-25.4437	73.7612		76.3	-3602.5	2887.76
76.4	-18.0787	28.0552		76.4	-12.1646	100.588		76.4	-619.906	599.432		76.4	16.3099	233.959		76.4	-26.3778	75.9409		76.4	-3601.25	2849.15
76.5	-18.0787	25.5642		76.5	-9.36213	102.456		76.5	-616.792	602.235		76.5	17.8668	230.534		76.5	-33.5396	77.1864		76.5	-3602.81	2866.59
76.6	-17.456	25.5642		76.6	-10.919	116.78		76.6	-615.546	616.87		76.6	19.7351	218.079		76.6	-39.4558	83.1026		76.6	-3602.81	2885.58
76.7	-20.5698	27.4325		76.7	-12.1646	114.911		76.7	-611.187	611.576		76.7	23.1603	216.522		76.7	-45.372	78.7433		76.7	-3602.19	2901.46
76.8	-18.7015	24.9414		76.8	-5.93695	115.846		76.8	-619.594	599.744		76.8	24.4059	225.24		76.8	-45.9948	88.3961		76.8	-3599.08	2905.51
76.9	-18.0787	26.1869		76.9	-4.69143	123.63		76.9	-615.546	613.756		76.9	19.4238	226.486		76.9	-42.881	93.3782		76.9	-3593.78	2898.04
77	-19.3243	25.5642		77	-8.42799	122.385		77	-608.073	616.247		77	19.1124	228.354		77	-43.8151	81.5457		77	-3582.57	2890.88
77.1	-18.7015	26.8097		77.1	-10.2963	113.354		77.1	-599.355	612.822		77.1	18.1782	238.63		77.1	-39.4558	75.0067		77.1	-3583.82	2909.56
77.2	-19.947	25.5642		77.2	-5.00281	103.079		77.2	-605.271	605.349		77.2	20.9807	229.911		77.2	-37.5875	64.7312		77.2	-3587.55	2889.01
77.3	-19.947	26.8097		77.3	-6.55971	98.7196		77.3	-604.025	598.187		77.3	24.0945	221.192		77.3	-33.8509	62.8629		77.3	-3592.54	2883.09
77.4	-21.1925	28.0552		77.4	-9.36213	97.7855		77.4	-598.109	601.924		77.4	24.4059	216.833		77.4	-32.9168	70.9588		77.4	-3585.06	2914.85
77.5	-21.1925	28.0552		77.5	-9.67351	99.9651		77.5	-594.684	597.253		77.5	24.0945	222.438		77.5	-35.4078	73.4498		77.5	-3567.63	2920.15
77.6	-21.8153	25.5642		77.6	-3.13452	90.6237		77.6	-602.78	598.81		77.6	20.9807	223.683		77.6	-37.2761	65.9767		77.6	-3567.63	2934.16
77.7	-20.5698	24.9414		77.7	-4.69143	88.1327		77.7	-606.205	610.642		77.7	24.4059	225.24		77.7	-32.294	66.9108		77.7	-3576.03	2921.08
77.8	-20.5698	27.4325		77.8	-9.05076	91.2465		77.8	-607.139	607.217		77.8	19.1124	230.845		77.8	-30.7371	66.9108		77.8	-3567.94	2910.8
77.9	-21.1925	24.9414		77.9	-11.2304	98.0969		77.9	-612.121	589.468		77.9	20.6693	230.534		77.9	-31.3599	70.0246		77.9	-3574.16	2904.26
78	-18.7015	25.5642		78	-13.7215	108.372		78	-616.169	589.468		78	25.9628	226.797		78	-28.5575	76.875		78	-3564.82	2884.02
78.1	-19.947	24.3187		78.1	-11.8532	107.127		78.1	-613.367	596.941		78.1	21.9148	218.39		78.1	-40.0786	68.7791		78.1	-3541.78	2879.35
78.2	-19.3243	26.1869		78.2	-12.4759	97.7855		78.2	-613.055	593.828		78.2	22.2262	218.39		78.2	-38.5216	75.6295		78.2	-3547.7	2878.42
78.3	-18.7015	28.678		78.3	-10.2963	101.522		78.3	-609.007	593.516		78.3	23.7831	218.701		78.3	-35.7192	71.5815		78.3	-3551.43	2892.43
78.4	-18.7015	29.9235		78.4	-8.11661	109.307		78.4	-605.582	591.959		78.4	19.4238	220.881		78.4	-36.342	69.4019		78.4	-3564.82	2879.98
78.5	-16.8332	26.1869		78.5	-11.5418	115.846		78.5	-601.534	601.924		78.5	16.3099	228.043		78.5	-31.9827	67.5336		78.5	-3565.76	2865.96
78.6	-17.456	26.1869		78.6	-14.0328	113.354		78.6	-606.516	593.828		78.6	14.4417	226.797		78.6	-26.6892	70.0246		78.6	-3551.12	2877.49
78.7	-16.8332	25.5642		78.7	-9.05076	109.929		78.7	-615.546	580.438		78.7	14.4417	223.683		78.7	-24.1981	69.0905		78.7	-3546.14	2877.8
78.8	-16.2104	24.3187		78.8	-9.05076	113.043		78.8	-616.792	575.456		78.8	11.0165	219.013		78.8	-28.2461	68.7791		78.8	-3543.03	2862.54
78.9	-18.7015	26.8097		78.9	-11.8532	110.241		78.9	-612.744	579.193		78.9	10.0824	204.689		78.9	-31.3599	75.0067		78.9	-3548.32	2852.58
79	-14.3422	28.678		79	-9.05076	108.372		79	-605.582	581.995		79	16.3099	206.557		79	-29.4916	75.9409		79	-3565.13	2866.59
79.1	-14.9649	27.4325		79.1	-10.2963	110.241		79.1	-594.995	570.786		79.1	15.3759	215.587		79.1	-31.9827	84.6595		79.1	-3548.94	2872.5
79.2	-16.2104	26.1869		79.2	-15.9011	112.732		79.2	-593.75	576.079		79.2	13.819	216.833		79.2	-36.0306	84.9709		79.2	-3544.9	2866.28
79.3	-16.2104	26.1869		79.3	-20.2605	113.043		79.3	-589.079	579.816		79.3	14.7531	216.21		79.3	-42.2582	83.1026		79.3	-3557.04	2867.83
79.4	-13.7194	24.9414		79.4	-17.1467	126.121		79.4	-597.175	587.911		79.4	17.5555	209.983		79.4	-40.3899	89.0189		79.4	-3564.51	2855.07
79.5	-19.3243	25.5642		79.5	-19.6377	131.415		79.5	-594.684	599.121		79.5	20.3579	210.605		79.5	-41.6355	92.444		79.5	-3572.61	2843.55
79.6	-16.8332	24.9414		79.6	-21.506	129.235		79.6	-599.977	604.726		79.6	14.7531	220.57		79.6	-37.8989	88.0847		79.6	-3585.37	2846.04
79.7	-14.9649	26.1869		79.7	-20.5718	123.007		79.7	-602.78	586.355		79.7	11.3279	226.486		79.7	-33.5396	87.1506		79.7	-3573.23	2851.02
79.8	-15.5877	24.3187		79.8	-23.6856	108.995		79.8	-599.355	605.971		79.8	11.6393	225.24		79.8	-31.6713	89.0189		79.8	-3565.13	2844.79
79.9	-14.9649	26.8097		79.9	-21.506	111.798		79.9	-594.995	607.528		79.9	16.3099	234.893		79.9	-35.0965	79.3661		79.9	-3564.51	2829.84
80	-15.5877	28.678		80	-17.7694	119.271		80	-597.486	591.959		80	17.2441	230.534		80	-38.5216	80.923		80	-3563.27	2826.42
80.1	-14.9649	28.678		80.1	-18.3922	116.157		80.1	-603.714	605.66		80.1	15.9985	235.516		80.1	-36.6534	82.1685		80.1	-3554.55	2835.76
80.2	-15.5877	26.1869		80.2	-15.5898	120.516		80.2	-615.546	595.696		80.2	21.6034	230.534		80.2	-32.6054	80.923		80.2	-3548.32	2853.82
80.3	-14.3422	26.1869		80.3	-16.2125	122.073		80.3	-607.139	591.025		80.3	22.5376	221.815		80.3	-37.5875	74.384		80.3	-3548.63	2860.36
80.4	-14.3422	25.5642		80.4	-12.7873	115.534		80.4	-601.846	586.977		80.4	20.9807	228.354		80.4	-36.342	76.2522		80.4	-3540.22	2864.1
80.5	-13.7194	24.9414		80.5	-11.8532	114.911		80.5	-603.402	584.175		80.5	21.6034	236.139		80.5	-31.0485	86.8392		80.5	-3538.98	2876.55
80.6	-13.0966	25.5642		80.6	-14.967	107.127		80.6	-598.732	594.762		80.6	26.2742	239.875		80.6	-36.9647	83.414		80.6	-3533.37	2865.34
80.7	-13.0966	27.4325		80.7	-10.2963	100.277		80.7	-602.78	592.894		80.7	29.3879	228.043		80.7	-35.4078	76.875		80.7	-3519.05	2845.41
80.8	-14.9649	26.1869		80.8	-13.7215	104.324		80.8	-609.63	587.911		80.8	31.879	221.504		80.8	-36.6534	75.0067		80.8	-3522.79	2825.49
80.9	-14.9649	26.8097		80.9	-12.4759	113.666		80.9	-610.564	575.768		80.9	25.9628	224.929		80.9	-32.294	84.3481		80.9	-3519.67	2823.31
81	-14.3422	26.1869		81	-6.55971	103.39		81	-608.073	556.773		81	25.9628	228.043		81	-29.4916	82.1685		81	-3519.36	2853.82
81.1	-14.9649	24.9414		81.1	-10.919	94.3603		81.1	-612.121	563.935		81.1	25.6514	228.043		81.1	-32.294	79.9888		81.1	-3515.63	2854.13
81.2	-17.456	26.1869		81.2	-6.87109	89.6896		81.2	-611.498	581.995		81.2	20.6693	222.749		81.2	-32.294	82.1685		81.2	-3524.03	2837.94
81.3	-15.5877	27.4325		81.3	-9.36213	92.1806		81.3	-608.696	593.828		81.3	17.5555	215.276		81.3	-33.5396	79.3661		81.3	-3522.79	2842.92
81.4	-19.947	26.8097		81.4	-12.7873	90.9351		81.4	-604.959	585.42		81.4	20.3579	219.947		81.4	-32.9168	76.875		81.4	-3523.72	2848.53
81.5	-16.2104	26.8097		81.5	-15.9011	94.0489		81.5	-591.881	591.648		81.5	22.2262	228.666		81.5	-31.9827	77.8092		81.5	-3522.16	2838.56
81.6	-16.8332	26.1869		81.6	-8.73937	87.1985		81.6	-583.786	584.486		81.6	19.7351	225.863		81.6	-30.4258	75.9409		81.6	-3528.08	2837.63
81.7	-17.456	26.8097		81.7	-5.62557	87.1985		81.7	-602.468	584.798		81.7	18.4896	221.504		81.7	-22.3299	75.0067		81.7	-3532.75	2842.3
81.8	-16.8332	23.6959		81.8	-10.2963	85.953		81.8	-607.139	583.863		81.8	17.5555	216.833		81.8	-31.9827	84.0368		81.8	-3529.01	2836.07
81.9	-14.3422	24.9414		81.9	-7.18247	83.462		81.9	-611.498	579.193		81.9	17.8668	222.749		81.9	-34.7851	83.1026		81.9	-3529.01	2847.59
82	-16.2104	28.0552		82	-10.2963	96.54		82	-602.468	561.133		82	18.1782	226.175		82	-28.8688	90.2644		82	-3508.46	2838.25
82.1	-17.456	25.5642		82.1	-12.4759	97.1627		82.1	-595.929	577.947		82.1	17.8668	233.959		82.1	-28.2461	91.8213		82.1	-3508.15	2819.26
82.2	-17.456	26.1869		82.2	-10.2963	89.3782		82.2	-594.995	589.157		82.2	22.2262	230.222		82.2	-26.3778	94.3123		82.2	-3518.12	2794.04
82.3	-17.456	27.4325		82.3	-11.5418	85.953		82.3	-587.522	573.277		82.3	26.8969	226.175		82.3	-21.7071	88.0847		82.3	-3522.79	2795.59
82.4	-17.456	28.0552		82.4	-6.55971	85.0189		82.4	-578.181	565.492		82.4	24.7173	223.683		82.4	-26.6892	87.7733		82.4	-3519.36	2824.24
82.5	-18.7015	24.9414		82.5	-11.5418	77.5457		82.5	-580.049	576.39		82.5	21.6034	225.24		82.5	-24.1981	92.444		82.5	-3515.31	2827.04
82.6	-15.5877	26.8097		82.6	-9.36213	82.8392		82.6	-572.887	567.672		82.6	20.0465	231.468		82.6	-23.8868	92.444		82.6	-3513.13	2827.66
82.7	-14.9649	25.5642		82.7	-14.3442	79.1027		82.7	-576.935	545.564		82.7	20.3579	237.073		82.7	-24.1981	99.9172		82.7	-3515.31	2830.47
82.8	-18.7015	26.1869		82.8	-12.4759	81.5937		82.8	-571.953	556.773		82.8	16.6213	233.648		82.8	-26.0664	110.504		82.8	-3498.81	2819.88
82.9	-19.3243	28.0552		82.9	-11.8532	91.8693		82.9	-570.396	570.474		82.9	20.6693	226.486		82.9	-26.6892	106.456		82.9	-3489.16	2818.63
83	-19.947	27.4325		83	-11.2304	94.0489		83	-569.462	574.833		83	21.2921	219.324		83	-32.294	98.0489		83	-3482	2823.93
83.1	-19.947	26.8097		83.1	-9.05076	97.4741		83.1	-567.594	570.474		83.1	21.6034	223.372		83.1	-34.1623	98.3603		83.1	-3481.06	2822.68
83.2	-18.0787	26.1869		83.2	-11.8532	101.522		83.2	-573.821	563.935		83.2	17.2441	217.145		83.2	-27.0006	104.277		83.2	-3491.03	2832.34
83.3	-17.456	26.1869		83.3	-16.2125	104.324		83.3	-573.51	564.247		83.3	15.9985	218.39		83.3	-25.4437	108.324		83.3	-3486.67	2836.07
83.4	-19.947	26.8097		83.4	-12.7873	94.0489		83.4	-570.085	577.013		83.4	19.1124	218.701		83.4	-26.6892	109.259		83.4	-3489.16	2837.94
83.5	-18.7015	26.8097		83.5	-12.7873	90.001		83.5	-570.085	575.456		83.5	19.1124	219.013		83.5	-24.8209	108.636		83.5	-3488.22	2835.76
83.6	-19.947	26.8097		83.6	-12.7873	94.0489		83.6	-575.378	581.061		83.6	18.801	231.468		83.6	-21.0843	106.456		83.6	-3495.07	2833.27
83.7	-21.1925	25.5642		83.7	-3.75728	107.127		83.7	-577.247	572.965		83.7	17.5555	238.941		83.7	-22.6412	105.522		83.7	-3493.83	2824.24
83.8	-19.3243	26.8097		83.8	-9.9849	106.815		83.8	-570.085	571.72		83.8	14.7531	242.366		83.8	-26.6892	97.7375		83.8	-3495.07	2800.26
83.9	-19.3243	28.0552		83.9	-15.5898	98.0969		83.9	-575.69	569.54		83.9	17.2441	236.45		83.9	-24.8209	111.75		83.9	-3491.96	2782.51
84	-21.1925	25.5642		84	-6.87109	102.456		84	-565.725	580.75		84	19.7351	241.121		84	-25.755	121.091		84	-3485.73	2793.72
84.1	-20.5698	26.8097		84.1	-10.919	100.588		84.1	-563.234	588.534		84.1	16.6213	241.121		84.1	-27.0006	112.995		84.1	-3480.13	2814.9
84.2	-20.5698	24.9414		84.2	-13.7215	94.3603		84.2	-564.169	590.714		84.2	18.801	247.348		84.2	-26.6892	97.4261		84.2	-3483.55	2823.93
84.3	-23.0608	26.8097		84.3	-16.5239	86.5758		84.3	-561.989	596.007		84.3	20.6693	242.678		84.3	-26.0664	83.7254		84.3	-3454.59	2811.47
84.4	-21.1925	27.4325		84.4	-15.9011	78.1685		84.4	-558.564	596.63		84.4	22.849	244.235		84.4	-25.755	83.1026		84.4	-3460.82	2810.85
84.5	-23.0608	26.8097		84.5	-14.967	80.3481		84.5	-562.612	593.516		84.5	23.7831	235.516		84.5	-22.3299	88.0847		84.5	-3468.92	2833.58
84.6	-26.1746	28.0552		84.6	-15.9011	87.5099		84.6	-552.647	589.468		84.6	25.0286	242.366		84.6	-27.0006	88.3961		84.6	-3462.69	2829.53
84.7	-26.1746	24.9414		84.7	-21.506	99.031		84.7	-549.845	603.48		84.7	21.6034	244.546		84.7	-35.0965	91.1985		84.7	-3471.1	2803.07
84.8	-21.8153	25.5642		84.8	-19.9491	100.277		84.8	-548.288	600.678		84.8	20.6693	242.678		84.8	-33.8509	91.8213		84.8	-3463	2804.62
84.9	-23.0608	24.3187		84.9	-17.7694	101.522		84.9	-545.486	583.863		84.9	16.9327	242.055		84.9	-30.1144	89.6416		84.9	-3470.48	2816.46
85	-24.9291	25.5642		85	-17.458	110.863		85	-550.156	594.762		85	15.6873	243.3		85	-26.3778	87.7733		85	-3476.7	2824.55
85.1	-24.9291	24.9414		85.1	-13.7215	116.468		85.1	-547.354	597.564		85.1	21.2921	241.432		85.1	-17.9705	89.6416		85.1	-3464.25	2832.65
85.2	-22.4381	25.5642		85.2	-15.9011	116.78		85.2	-546.108	582.929		85.2	20.3579	245.48		85.2	-12.3657	83.1026		85.2	-3471.1	2832.96
85.3	-26.1746	26.8097		85.3	-20.2605	108.372		85.3	-543.617	572.031		85.3	21.6034	244.235		85.3	-15.7909	72.2043		85.3	-3472.97	2830.47
85.4	-21.8153	24.9414		85.4	-16.2125	101.522		85.4	-538.947	555.839		85.4	17.2441	237.073		85.4	-18.2819	73.1384		85.4	-3464.87	2830.16
85.5	-18.7015	24.3187		85.5	-15.2784	91.5579		85.5	-537.701	567.36		85.5	18.4896	241.121		85.5	-17.3478	79.9888		85.5	-3460.82	2812.1
85.6	-18.7015	24.3187		85.6	-19.3263	82.8392		85.6	-537.701	567.049		85.6	24.0945	246.103		85.6	-15.1681	83.414		85.6	-3476.39	2800.26
85.7	-20.5698	26.8097		85.7	-19.3263	77.2344		85.7	-549.222	572.965		85.7	22.2262	243.3		85.7	-16.4136	83.414		85.7	-3469.54	2803.07
85.8	-21.8153	27.4325		85.8	-20.2605	77.8571		85.8	-560.432	588.223		85.8	19.1124	243.3		85.8	-18.5933	81.5457		85.8	-3471.41	2821.44
85.9	-21.8153	27.4325		85.9	-18.3922	78.7913		85.9	-547.354	598.187		85.9	18.1782	249.217		85.9	-21.3957	72.5157		85.9	-3465.8	2843.86
86	-22.4381	25.5642		86	-19.3263	75.3661		86	-552.025	600.678		86	21.6034	252.33		86	-19.8388	60.9946		86	-3464.56	2846.35
86.1	-21.8153	22.4504		86.1	-28.9791	78.1685		86.1	-545.486	615.624		86.1	22.849	257.312		86.1	-14.5453	62.5515		86.1	-3451.48	2837.63
86.2	-21.1925	23.6959		86.2	-27.1108	69.7612		86.2	-548.288	622.163		86.2	21.2921	253.887		86.2	-12.0543	59.4377		86.2	-3449.92	2826.11
86.3	-24.9291	22.4504		86.3	-23.0629	66.3361		86.3	-553.893	624.966		86.3	25.0286	243.923		86.3	-20.1502	59.4377		86.3	-3456.15	2832.65
86.4	-22.4381	23.0731		86.4	-24.9312	60.4198		86.4	-545.174	635.553		86.4	18.801	243.923		86.4	-25.1323	67.5336		86.4	-3470.48	2844.17
86.5	-24.3063	26.8097		86.5	-25.2425	57.6174		86.5	-540.192	624.654		86.5	21.2921	247.348		86.5	-25.1323	70.9588		86.5	-3476.39	2840.43
86.6	-21.8153	25.5642		86.6	-21.506	71.0068		86.6	-541.749	619.049		86.6	22.849	248.905		86.6	-22.0185	75.9409		86.6	-3486.04	2831.09
86.7	-23.0608	25.5642		86.7	-21.1946	80.0368		86.7	-538.947	630.571		86.7	26.2742	254.822		86.7	-29.803	67.2222		86.7	-3475.46	2809.29
86.8	-23.6836	24.9414		86.8	-22.4401	81.9051		86.8	-536.144	625.277		86.8	26.8969	261.983		86.8	-32.9168	64.4198		86.8	-3462.69	2817.39
86.9	-22.4381	26.1869		86.9	-19.0149	84.0847		86.9	-542.995	631.505		86.9	25.34	259.492		86.9	-33.2282	68.1564		86.9	-3462.07	2829.53
87	-24.3063	25.5642		87	-17.7694	94.3603		87	-552.025	632.75		87	20.6693	258.558		87	-28.2461	65.9767		87	-3471.72	2817.39
87.1	-22.4381	23.0731		87.1	-15.2784	99.3424		87.1	-546.42	620.606		87.1	24.4059	256.378		87.1	-24.1981	65.0425		87.1	-3479.19	2801.2
87.2	-20.5698	22.4504		87.2	-8.42799	101.211		87.2	-547.354	623.409		87.2	24.7173	259.803		87.2	-18.9047	57.5694		87.2	-3464.87	2786.25
87.3	-19.947	24.9414		87.3	-8.42799	92.1806		87.3	-547.977	616.558		87.3	23.4717	264.474		87.3	-14.5453	54.4556		87.3	-3460.51	2787.81
87.4	-17.456	25.5642		87.4	-10.2963	88.444		87.4	-538.947	613.756		87.4	22.2262	261.672		87.4	-17.3478	62.2401		87.4	-3465.18	2802.44
87.5	-18.0787	24.3187		87.5	-9.67351	89.0668		87.5	-552.647	612.822		87.5	21.6034	257.935		87.5	-19.216	59.7491		87.5	-3481.06	2824.24
87.6	-18.0787	26.8097		87.6	-15.9011	83.462		87.6	-545.486	621.541		87.6	18.801	253.887		87.6	-15.1681	58.5036		87.6	-3466.43	2831.71
87.7	-19.947	25.5642		87.7	-14.6556	83.462		87.7	-551.402	599.744		87.7	21.2921	253.265		87.7	-17.9705	56.3239		87.7	-3466.43	2829.53
87.8	-18.0787	24.9414		87.8	-17.458	93.7375		87.8	-558.564	615.002		87.8	15.9985	254.822		87.8	-25.4437	61.9287		87.8	-3481.06	2817.39
87.9	-17.456	24.9414		87.9	-16.2125	86.8871		87.9	-557.318	634.307		87.9	15.0645	246.103		87.9	-23.8868	65.6653		87.9	-3487.6	2794.97
88	-14.9649	23.0731		88	-16.8353	84.0847		88	-553.893	630.259		88	14.4417	243.923		88	-27.3119	67.5336		88	-3479.51	2794.35
88.1	-16.2104	23.0731		88.1	-17.7694	100.588		88.1	-542.06	631.816		88.1	15.9985	257.001		88.1	-29.4916	65.9767		88.1	-3488.85	2807.43
88.2	-15.5877	24.3187		88.2	-23.3743	108.372		88.2	-531.474	629.014		88.2	20.6693	259.492		88.2	-29.4916	58.5036		88.2	-3473.28	2809.92
88.3	-16.2104	23.6959		88.3	-21.8174	104.947		88.3	-545.797	624.654		88.3	21.2921	264.163		88.3	-28.8688	62.2401		88.3	-3431.86	2790.61
88.4	-15.5877	26.1869		88.4	-21.506	105.259		88.4	-549.222	626.834		88.4	21.2921	266.654		88.4	-33.2282	57.5694		88.4	-3412.87	2781.27
88.5	-14.9649	26.8097		88.5	-24.9312	104.636		88.5	-536.456	610.642		88.5	15.9985	263.54		88.5	-31.6713	53.2101		88.5	-3427.5	2794.97
88.6	-11.8511	24.9414		88.6	-26.1767	102.145		88.6	-541.438	610.954		88.6	23.4717	255.133		88.6	-26.3778	54.767		88.6	-3438.4	2793.41
88.7	-12.4739	23.6959		88.7	-28.3564	110.241		88.7	-537.078	624.654		88.7	24.7173	252.642		88.7	-22.9526	52.5873		88.7	-3437.16	2794.35
88.8	-13.0966	22.4504		88.8	-21.506	117.714		88.8	-531.785	623.72		88.8	21.2921	254.822		88.8	-18.2819	50.4077		88.8	-3424.39	2799.64
88.9	-14.9649	26.1869		88.9	-20.5718	105.881		88.9	-524.935	609.397		88.9	23.4717	262.295		88.9	-18.9047	52.5873		88.9	-3427.19	2790.61
89	-13.0966	21.8276		89	-18.3922	101.522		89	-519.641	606.906		89	23.4717	259.492		89	-17.3478	56.6353		89	-3425.64	2802.13
89.1	-15.5877	23.0731		89.1	-16.2125	107.75		89.1	-517.15	608.774		89.1	23.1603	258.869		89.1	-15.1681	58.5036		89.1	-3438.71	2828.6
89.2	-14.9649	24.3187		89.2	-11.2304	108.995		89.2	-532.719	614.067		89.2	24.4059	249.217		89.2	-15.1681	62.8629		89.2	-3436.22	2825.8
[truncated: 211 more rows]
