# Supplementary material for: Functional implications of the exon 9 splice insert in GluK1 kainate receptors
Source: eLife. 2024 Nov 6;12:RP89755. doi: 10.7554/eLife.89755 (PMC11540303; doi:10.7554/eLife.89755)
Supplement: Figure 5—source data 1. [file elife-89755-fig5-data1.xlsx]

## Sheet: Figure 5
Figure 5A
GluK1-1a + Neto1								K368-E + Neto1									K375_379_382H376-E + Neto1							K368_375_379_382H376-E+Neto1
10 mM Glu Desensitization (ms)	A1	Tau1	A2	Tau2	Mean-weighted ƮDes @ ≤100 ms			10 mM Glu Desensitization (ms)	A1	Tau1	A2	Tau2	Mean-weighted ƮDes @ ≤100 ms			10 mM Glu Desensitization (ms)	A1	Tau1	A2	Tau2	Mean-weighted ƮDes @ ≤100 ms			10 mM Glu Desensitization (ms)	A1	Tau1	A2	Tau2	Mean-weighted ƮDes @ ≤100 ms
Cell 2	5.35609	-50.039	-931.497	3.24083	3.54896			Cell 4	-356.276	4.36415	51.781	0.974946	4.9405			Cell 2	-2328.41	3.78454	259.61	0.942938	4.14113			Cell 1 E-2	-98.6721	14.4308	-251.061	1.67063	5.27073
Cell 3	-7.04081	50.6081	-499.8	3.21528	3.87364			Cell 5	-26.0613	20.626	-248.657	2.06947	3.82985			Cell 3	-34.6042	14.0877	-1152.09	3.18815	3.50598			Cell 1 E-4	-4.98979	30.242	-40.6422	1.63111	4.75966
Cell 4	121.175	21.0585	-4357.76	4.63587	4.16615			Cell 7	-100.257	4.13027	-0.503575	0.963579	4.11444			Cell 4	1.74226	-9.17267	-1925.52	3.60678	3.61835			Cell 2 E-4	-30.7028	39.6896	-235.544	2.04411	6.38529
Cell 5	-96.5845	17.4141	-1821.07	2.24654	3.01047			Cell 8	-162.925	4.51108	3.85351	0.981702	4.59658			Cell 5	-99.1839	23.6642	-2610.86	3.58998	4.32467			Cell 3 E-1	-30.2694	3.6818	12.0115	0.935413	5.48859
Cell 6	84.9893	6.22876	-1806.57	2.287	2.09241							Mean	4.37034			Cell 6	34.5958	-40.8991	-1448.95	3.31806	4.39963			Cell 3 E-4	1.39276	9.52076	-21.8336	2.85535	2.4012
Cell 7	-3522.96	2.61835	1619.98	0.847826	4.12557							SEM	0.2473			Cell 7	269.725	6.99344	-1413.81	4.44586	3.84525							Mean	4.86109
Cell 8	-60.0395	49.5298	-2418.47	2.59709	3.73399							N	4			Cell 8	2.68976	-14.8209	-1221.39	2.60686	2.64532							SEM	0.668808
Cell 9	13.8921	-26.0118	-3342.08	3.53618	3.65951											Cell 9	-20.8005	31.154	-1359.78	3.03019	3.45392							N	5
Cell 10	12.1233	-61.0297	-3173.91	3.54506	3.79266															Mean	3.74178
				Mean	3.55593															SEM	0.202601
				SEM	0.215244															N	8
				N	9
GluK1-1a + Neto2								K368-E + Neto2									K375_379_382H376-E + Neto2
10 mM Glu Desensitization (ms)	A1	Tau1	A2	Tau2	Mean-weighted ƮDes @ 100 ms			10 mM Glu Desensitization (ms)	A1	Tau1	A2	Tau2	Mean-weighted ƮDes @ ≤100 ms			10 mM Glu Desensitization (ms)	A1	Tau1	A2	Tau2	Mean-weighted ƮDes @ 100 ms
Cell 2	-1083.04	108.976	-396.844	11.0084	82.7051			Cell 1	-105.449	360.895	-449.582	26.7886	90.2647			Cell 1	-2204.16	145.177	-94.6407	1.24619	139.251
Cell 4	-1510.18	100.686	-380.221	10.8136	82.6097			Cell 2	-430.14	131.245	-474.065	19.2043	72.5033			Cell 2	-1649.2	137.335	-779.966	9.79789	96.3849
Cell 5	-1318.13	71.5416	-360.52	8.60343	58.0245			Cell 7	-1186.47	27.091	2.22743	-22.6101	90.2647			Cell 3	-779.693	28.2561	0.613487	-15.6517	28.2907
Cell 6	-1784.09	119.552	-301.217	19.4202	105.088			Cell 8	-481.157	103.535	-535.216	17.3459	72.5033			Cell 4	0.777557	-32.6709	-28.8448	25.1512	26.7531
Cell 11	-824.318	58.8903	-279.292	9.72336	46.4476			Cell 9	-680.513	77.4607	-59.666	2.77618	71.4404			Cell 5	-1487.28	87.674	-501.049	20.0517	70.6335
Cell 12	-853.493	48.4723	-160.495	12.959	42.8512							Mean	79.3952			Cell 6	-94.6417	88.4292	-6.28705	1.23883	82.9979
				Mean	69.6211							SEM	4.44167			Cell 19	29.6685	13.7382	-2.1227	1.15087	14.7082
				SEM	9.97653							N	5			Cell 22	-41.7395	119.848	-7.09819	1.24343	102.61
				N	6															Mean	65.5742
																				SEM	17.0373
																				N	8
Figure 5B
GluK1-1a + Neto1																											K368-E + Neto1																				K375_379_382H376-E + Neto1
Recovery (s)	Cell 1			Cell 2			Cell 3			Cell 4			Cell 5			Cell 6			Cell 7			Cell 8					Cell 2			Cell 3			Cell 4			Cell 6			Cell 7			Cell 8					Cell 1
	Imax	I	%	Imax	I	%	Imax	I	%	Imax	I	%	Imax	I	%	Imax	I	%	Imax	I	%	Imax	I	%		Recovery (s)	Imax	I	%	Imax	I	%	Imax	I	%	Imax	I	%	Imax	I	%	Imax	I	%		Recovery (s)	Imax	I	%
0.05				968	91	9.40083	672	74	11.0119	2955	349	11.8105	2251	200	8.88494	2002	50	2.4975	3231	311	9.6255	2616	205	7.83639		0.05	77	10	12.987	352	54	15.3409	331	59	17.8248	39	4	10.2564	84	5	5.95238					0.05	375	49	13.0667
0.1	134	7.9	5.89552	961	158	16.4412	680	167	24.5588	3011	662	21.9861	2267	433	19.1001	2040	163	7.9902	3363	370	11.0021	2584	413	15.983		0.1	85	24	28.2353	339	60	17.6991	317	69	21.7666	48	8	16.6667	70	10	14.2857					0.1	363	71	19.5592
0.2				1001	292	29.1708	674	222	32.9377	3003	1157	38.5281	2234	721	32.2739	1974	284	14.387	3355	1068	31.8331	2625	667	25.4095		0.2	90	31	34.4444	91	35	38.4615	326	124	38.0368	53	13	24.5283	84	23	27.381	168	68	40.4762		0.2	418	143	34.2105
0.3	124	38	30.6452	989	356	35.996	682	298	43.695	3069	1490	48.55	2216	923	41.6516	2046	504	24.6334	3363	1362	40.4996	2530	939	37.1146		0.3	81	38	46.9136	79	38	48.1013	324	162	50	47	21	44.6809	83	34	40.9639	164	89	54.2683		0.3	357	161	45.098
0.5	119	42	35.2941	995	488	49.0452	674	396	58.7537	3087	1829	59.2485	2196	1189	54.1439	1926	737	38.2658	3455	1903	55.0796	2650	2158	81.434		0.5	72	46	63.8889	84	65	77.381	298	186	62.4161	49	33	67.3469	84	51	60.7143	182	107	58.7912		0.5	384	206	53.6458
1	124	67	54.0323	980	724	73.8776	674	510	75.6677	3140	2335	74.3631	2239	1534	68.5127	1930	1133	58.7047	3570	2643	74.0336	2596	1628	62.7119		1	81	55	67.9012	84	63	75	335	244	72.8358	53	40	75.4717	87	73	83.908	171	145	84.7953		1	428	312	72.8972
2	163	105	64.4172	968	895	92.4587	707	619	87.553	3151	2772	87.9721	2173	1970	90.6581	2025	1605	79.2593	3686	3321	90.0977	2632	2119	80.5091		2	99	67	67.6768	99	71	71.7172	338	297	87.8698	71	46	64.7887	90	84	93.3333	175	136	77.7143		2	362	341	94.1989
3	140	123	87.8571	1040	981	94.3269	712	663	93.118	3354	3280	97.7937	2327	2131	91.5771	2086	1818	87.1524	3728	3467	92.9989	2634	2280	86.5604		3	88	83	94.3182	98	83	84.6939	340	327	96.1765	58	56	96.5517	103	105	101.942	152	146	96.0526		3	492	495	100.61
4	128	121	94.5312	936	925	98.8248	695	659	94.8201	3277	3187	97.2536	2349	2213	94.2103	2196	1910	86.9763	3920	3706	94.5408	2711	2500	92.2169		Tau Recovery (s)			0.39			0.26			0.54			0.36			0.53			0.5		4	549	488	88.8889
5	172	124	72.093	959	920	95.9333	690	656	95.0725	3181	3059	96.1647	2439	2313	94.8339	2001	1896	94.7526	4038	3907	96.7558	2844	2622	92.1941		Mean	0.43																			5	486	525	108.025
Tau Recovery (s)			0.98			0.72			0.58			0.58			0.66			0.95			0.59			0.39		SEM	0.045607																			6	561	536	95.5437
																							Mean	0.68125		N	6																			Tau Recovery (s)			0.7
																							SEM	0.070342																						Mean	0.66375
																							N	8																						SEM	0.0781468
																																														N	8
GluK1-1a + Neto2																	K368-E + Neto2												K375_379_382H376-E + Neto2
Recovery (s)	Cell 1			Cell 5			Cell 6			Cell 7			Cell 9					Cell 1			Cell 5			Cell 7				Recovery (s)	Cell 5			Cell 2			Cell 3
	Imax	I	%	Imax	I	%	Imax	I	%	Imax	I	%	Imax	I	%		Recovery (s)	Imax	I	%	Imax	I	%	Imax	I	%			Imax	I	%	Imax	I	%	Imax	I	%
0.1	11819	4543	38.4381				3566	1213	34.0157	1739	352	20.2415	507	20	3.94477		0.05							1412.88	392.4	27.7731		0.05	4236.65	1265.9	29.8797
0.2				7023	2543	36.2096	3535	1198	33.8897	1731	399	23.0503	544	37	6.80147		0.1							1384.65	442.17	31.9337		0.1							1352	225.74	16.6967
0.3	11211	4703	41.9499	6500	2399	36.9077	3491	1115	31.9393	1614	381	23.6059	521	56	10.7486		0.2											0.2				3023.88	965.28	31.9219
0.5	10260	4301	41.9201	5779	2200	38.0689	3397	1035	30.4681	1621	395	24.3677	522	58	11.1111		0.3	441	153	34.6939	106	25	23.5849					0.3				3243.77	1111.89	34.2777	1402.34	249.66
1	10090	4708	46.6601	5322	2182	40.9996	3480	1245	35.7759	1558	479	30.7445	491	95	19.3483		0.5	413	152	36.8039								0.5				3123.43	943.56	30.2091	1426.96	340.76	23.8801
2	9092	4876	53.6296	4559	2274	49.8794	3293	1340	40.6924	1589	589	37.0673	546	146	26.7399		1	638	239	37.4608	94	31	32.9787	1293.9	508.41	39.2928		1	3600.67	1458.67	40.5111	3826.31	1546.5	40.4175	1339.6	343.45	25.6383
3	7487	4498	60.0775	4126	2267	54.9443	3477	1500	43.1406	1692	791	46.7494	533	245	45.9662		2	834	376	45.0839	97	34	35.0515	1355	602.6	44.4723		2	3809.85	1854.48	48.6759	3924.09	1868.09	47.6057	1405.89	470.2	33.445
4	7077	4608	65.1123	4215	2581	61.2337	3264	1598	48.9583	1527	826	54.093	506	218	43.083		3	726	351	48.3471	105	42	40					3				4174.79	2236.94	53.5821
5	6364	4515	70.9459	3926	2636	67.1421	3124	1788	57.2343	1541	879	57.0409	504	259	51.3889		4	719	378	52.573				1424.4	758.6	53.2575		4	4359	2511	57.605	4509.38	2700.38	59.8836	1316.82	768.72	58.377
6				4167	2084	50.012	3227	1949	60.3967	1536	1013	65.9505	499	281	56.3126		5	626	377	60.2236	99	50	50.5051					5				4779.38	3051.38	63.8447	1377.91	908.75	65.9513
7	5749	4370	76.0132	3969	2875	72.4364	3054	1961	64.2109	1481	1034	69.8177	511	297	58.1213		6	517	359	69.4391				1353.18	819.74	60.5788		6	4377	2966.46	67.7738	3947.05	2653.49	67.2272	1471.63	1056.91	71.819
8	5502	4404	80.0436				2946	2068	70.1969	1467	1101	75.0511	473	315	66.5962		7	492	374	76.0163								7				3095.25	2250.25	72.7001	1521.77	1105.63	72.6542
9	5488	4438	80.8673	2530	1928	76.2055	3310	2355	71.148	1478	1094	74.0189	460	354	76.9565		8	490	349	71.2245				1466.7	1016.95	69.3359		8	4190.27	3290.4	78.5248	3101.25	2302.25	74.2362
10	5721	4595	80.3181	2828	2204	77.9349	3175	2406	75.7795	1435	1188	82.7875	479	367	76.618		9	580	403	69.4828								9				2963.98	2440.84	82.3501
11	6005	4921	81.9484	3085	2532	82.0746	2962	2376	80.2161	1465	1146	78.2253	499	374	74.9499		10	541	427	78.9279								10	3730.33	2809.5	75.3151	2875.81	2437.23	84.7493	2714.8	2264.8	83.4242
15	5411	5001	92.4228	2961	2545	85.9507	3003	2560	85.2481	1428	1245	87.1849	433	410	94.6882		12							1279.2	982.5	76.8058		11							2657.26	2437.26	91.7208
20	5772	5399	93.5378	2942	2678	91.0265	3012	2695	89.4754	1367	1263	92.3921	417	409	98.0815		15	595	490	82.3529	99	83	83.8384	1604.7	1231.87	76.7664		12	4574	3366.1	73.592
25	6252	6196	99.1043				2848	2755	96.7346	1371	1293	94.3107	460	407	88.4783		20	615	514	83.5772				1413.2	1216.76	86.0996		15	5081.17	4402.17	86.6369	2766.81	2528.81	91.398	2769.84	2613.27	94.3473
Tau Recovery (s)			7.66			8.91			11.21			6.78			7.03		25	657	553	84.1705	227	189	83.2599	1625.05	1474.66	90.7455		20	4858.62	4269.17	87.868
														Mean	8.318		Tau Recovery (s)			6.04			8.215			8.738		25	4767.21	4123.32	86.4934
														SEM	0.811526		Mean	7.66433										Tau Recovery (s)			5.762			7.769			6.176
														N	5		SEM	0.82608										Mean	6.569
																	N	3										SEM	0.611787
Figure 5C																												N	3
GluK1-1a + Neto1					K368-E + Neto1					K375_379_382H376-E + Neto1					K368_375_379_382H376-E+Neto1
Kai efficacy	10 mM Glu	1 mM Kai	IK/IG		Kai efficacy	10 mM Glu	1 mM Kai	IK/IG		Kai efficacy	10 mM Glu	1 mM Kai	IK/IG		Kai efficacy	10 mM Glu	1 mM Kai	IK/IG
Cell 1	121.32	169.55	1.39754		Cell 1	47.33	245.3	5.18276		Cell 1	401.83	576.58	1.43489		Cell 1 E-4	107.41	130.1	1.21125
Cell 2	663.98	813.44	1.2251		Cell 2	140.89	1066.49	7.56966		Cell 5	2767.19	4330.32	1.56488		Cell 2 E-4	461.71	391	0.846852
Cell 3	632.38	804.25	1.27178		Cell 4	309.69	2410	7.78198		Cell 6	1890.51	4315.75	2.28285		Cell 3 E-1	89.1	76.6	0.859708
Cell 4	3514	4940	1.40581		Cell 7	222.42	1608.93	7.23375		Cell 7	1272.87	2456.87	1.93018		Cell 3 E-4	80.8	135.6	1.67822
Cell 5	2423	2962	1.22245		Cell 8	222.79	1600.72	7.18488		Cell 8	1458.87	2525.75	1.73131				Mean	1.14901
Cell 6	1913	2295	1.19969				Mean	6.99061		Cell 9	1528	1872	1.22513				SEM	0.195561
Cell 7	2662	3135	1.17769				SEM	0.465121				Mean	1.69487				N	4
Cell 8	2968	3230	1.08827				N	5				SEM	0.153576
		Mean	1.24854									N	6
		SEM	0.0382185
		N	8
GluK1-1a + Neto2					K368-E + Neto2						K375_379_382H376-E + Neto2
Kai efficacy	10 mM Glu	1 mM Kai	IK/IG		Kai efficacy	10 mM Glu	1 mM Kai	IK/IG		Kai efficacy	10 mM Glu	1 mM Kai	IK/IG
Cell 2	2779.8	3199	1.1508		Cell 2	109.45	208.94	1.909		Cell 4	127.68	133.25	1.04362
Cell 4	3828	3839	1.00287		Cell 5	93.89	220.84	2.35211		Cell 5	3795.24	3547.14	0.934629
Cell 5	3041.3	3368.3	1.10752		Cell 8	528.47	1240.53	2.3474		Cell 6	1013.07	706.05	0.696941
Cell 6	2769	3031	1.09462		Cell 9	963.52	1847.1	1.91703		Cell 19	59.8	46.48	0.777258
Cell 7	1331.8	1594	1.19688				Mean	2.13139				Mean	0.863113
Cell 9	702.8	964.65	1.37258				SEM	0.12609				SEM	0.0778263
Cell 11	1804	872	0.48337				N	4				N	4
Cell 12	1733	1472	0.849394
Cell 13	1439	1310	0.910354
Cell 14	1323	1439	1.08768
Cell 15	979.7	1169	1.19322
Cell 16	1095	975.8	0.891142
Cell 17	10203	7186	0.704303
		Mean	1.00344
		SEM	0.0651734
		N	13
Figure 5D
GluK1-1a + Neto1					K368-E + Neto1						K375_379_382H376-E + Neto1				K368_375_379_382H376-E+Neto1
Rectification index	I -90 mV	I 90 mV	I 90 mV/I -90 mV		Rectification index	I -90 mV	I 90 mV	I 90 mV/I -90 mV		Rectification index	I -90 mV	I 90 mV	I 90 mV/I -90 mV		Rectification index	I -90 mV	I 90 mV	I 90 mV/I -90 mV
Cell 1	196.42	300.98	1.53233		Cell 2	265	683.01	2.5774		Cell 1	686.55	806.5	1.17471		Cell 2 E-4	575.38	588.77	1.02327
Cell 2	1489.39	1466.14	0.98439		Cell 4	371.807	1041.3	2.80065		Cell 3	1798.91	1834	1.01951		Cell 3 E-2	109.28	30.7	0.28093
Cell 3	1175.04	1463.06	1.24512		Cell 6	62.84	197.6	3.14449		Cell 5	4429	4788	1.08106		Cell 3 E-4	1129.3	392.8	0.347826
Cell 4	4680.94	4766.2	1.01821				Mean	2.84085		Cell 7	2053	2830.31	1.37862		Cell 4 E-2	310.8	209	0.672458
Cell 5	2907	3915.76	1.34701				SEM	0.164936		Cell 8	2383.2	3159.9	1.32591		Cell 3 E2 (RV)	2430	1505.28	0.619457
Cell 6	2948.69	3226	1.09405				N	3		Cell 9	2186.4	3085.52	1.41123				Mean	0.588788
Cell 7	5254.53	4607.1	0.876786									Mean	1.23184				SEM	0.132204
		Mean	1.15684									SEM	0.0667482				N	5
		SEM	0.0867781									N	6
		N	7
GluK1-1a + Neto2					K368-E + Neto2						K375_379_382H376-E + Neto2
Rectification index	I -90 mV	I 90 mV	I 90 mV/I -90 mV		Rectification index	I -90 mV	I 90 mV	I 90 mV/I -90 mV		Rectification index	I -90 mV	I 90 mV	I 90 mV/I -90 mV
Cell 6	3396.3	2419.54	0.712405		Cell 5_RV	148.52	328.4	2.21115		Cell 4	184.53	141.6	0.767355
Cell 7	1933.82	1783.67	0.922356		Cell 7_RV	2053	2978	1.45056		Cell 5	6982.6	4352.82	0.623381
Cell 9	865.39	727.4	0.840546		Cell 5	460.6	328	0.712115		Cell 8	102.34	97.24	0.950166
Cell 10	658.3	485.72	0.73784		Cell 7	395.1	59.6	0.150848		Cell 32	178.9	96	0.536613
		Mean	0.803287		Cell 12	369	264	0.715447				Mean	0.719379
		SEM	0.0483981		Cell 13	2986.4	1785	0.59771				SEM	0.0904542
		N	4		Cell 15	53	6.8	0.128302				N	4
					Cell 17	227	33.8	0.148899
							Mean	0.764379
							SEM	0.259007
							N	8
[truncated: 31 more columns]
