# Supplementary material for: Functional implications of the exon 9 splice insert in GluK1 kainate receptors
Source: eLife. 2024 Nov 6;12:RP89755. doi: 10.7554/eLife.89755 (PMC11540303; doi:10.7554/eLife.89755)
Supplement: Figure 6—figure supplement 2—source data 1. [file elife-89755-fig6-figsupp2-data1.xlsx]

## Sheet: Figure 6-figure supplement 2B
B
GluK1-1aEM DDM			GluK1-1aEM ND
Volume (ml)	Fluorescence		Volume (mL)	Absorbance280nm (mAU)
0	0.148705		0	-0.08274
0.0036	0.14892		0.002	-0.08195
0.0072	0.149564		0.004	-0.08117
0.0108	0.150714		0.006	-0.08048
0.0144	0.152389		0.008	-0.08046
0.018	0.154475		0.01	-0.08112
0.0216	0.156722		0.012	-0.08017
0.0252	0.158797		0.014	-0.0808
0.0288	0.160328		0.016	-0.08253
0.0324	0.161032		0.018	-0.08394
0.036	0.16074		0.02	-0.08422
0.0396	0.159452		0.022	-0.08521
0.0432	0.157336		0.024	-0.08638
0.0468	0.154737		0.026	-0.08732
0.0504	0.152109		0.028	-0.08821
0.054	0.149862		0.03	-0.08804
0.0576	0.148258		0.032	-0.08962
0.0612	0.147347		0.034	-0.09145
0.0648	0.146977		0.036	-0.09237
0.0684	0.146929		0.038	-0.09181
0.072	0.146899		0.04	-0.09003
0.0756	0.146625		0.042	-0.08828
0.079201	0.145946		0.044	-0.08951
0.082801	0.144801		0.046	-0.09036
0.086401	0.143353		0.048	-0.09126
0.090001	0.141863		0.05	-0.09205
0.093601	0.140629		0.052	-0.09158
0.097201	0.13992		0.054	-0.09235
0.100801	0.139878		0.056	-0.09389
0.104401	0.140504		0.058	-0.09494
0.108001	0.141654		0.06	-0.09568
0.111601	0.143138		0.062	-0.09522
0.115201	0.144724		0.064	-0.09691
0.118801	0.146232		0.066	-0.09833
0.122401	0.147525		0.068	-0.09936
0.126001	0.148539		0.07	-0.09982
0.129601	0.149319		0.072	-0.09951
0.133201	0.149999		0.074	-0.09858
0.136801	0.15072		0.076	-0.09865
0.140401	0.151596		0.078	-0.10035
0.144001	0.152627		0.08	-0.10045
0.147601	0.153772		0.082	-0.10016
0.151201	0.154952		0.084	-0.099
0.154801	0.156037		0.086	-0.10009
0.158401	0.156824		0.088	-0.10154
0.162001	0.157098		0.09	-0.10167
0.165601	0.156716		0.092	-0.09941
0.169201	0.155691		0.094	-0.09888
0.172801	0.154177		0.096	-0.09856
0.176401	0.152401		0.098	-0.09878
0.180001	0.150553		0.1	-0.0985
0.183601	0.148878		0.102	-0.09795
0.187201	0.147603		0.104	-0.09835
0.190801	0.146888		0.106	-0.09773
0.194401	0.146721		0.108	-0.09595
0.198001	0.146935		0.11	-0.09729
0.201601	0.147245		0.112	-0.09842
0.205201	0.147412		0.114	-0.0975
0.208801	0.147299		0.116	-0.09862
0.212401	0.146882		0.118	-0.10082
0.216001	0.146232		0.12	-0.10199
0.219601	0.145511		0.122	-0.10236
0.223201	0.144915		0.124	-0.10324
0.226801	0.14464		0.126	-0.10551
0.230401	0.144807		0.128	-0.10553
0.234001	0.145403		0.13	-0.10669
0.237602	0.146297		0.132	-0.10784
0.241202	0.147233		0.134	-0.10771
0.244802	0.148002		0.136	-0.10739
0.248402	0.148491		0.138	-0.10807
0.252002	0.148741		0.14	-0.1098
0.255602	0.148872		0.142	-0.10954
0.259202	0.149027		0.144	-0.10976
0.262802	0.149349		0.146	-0.10972
0.266402	0.149951		0.148	-0.109
0.270002	0.150887		0.15	-0.10825
0.273602	0.152145		0.152	-0.10826
0.277202	0.153629		0.154	-0.10817
0.280802	0.155167		0.156	-0.10791
0.284402	0.156609		0.158	-0.10845
0.288002	0.157849		0.16	-0.10951
0.291602	0.158826		0.162	-0.10965
0.295202	0.159571		0.164	-0.1081
0.298802	0.16015		0.166	-0.10843
0.302402	0.16065		0.168	-0.10905
0.306002	0.161103		0.17	-0.11011
0.309602	0.161485		0.172	-0.11232
0.313202	0.161801		0.174	-0.11255
0.316802	0.162081		0.176	-0.11316
0.320402	0.162349		0.178	-0.11356
0.324002	0.162564		0.18	-0.11297
0.327602	0.162647		0.182	-0.11325
0.331202	0.162528		0.184	-0.11315
0.334802	0.162236		0.186	-0.11459
0.338402	0.161854		0.188	-0.11504
0.342002	0.161479		0.19	-0.11401
0.345602	0.161175		0.192	-0.11429
0.349202	0.160996		0.194	-0.11421
0.352802	0.161008		0.196	-0.11383
0.356402	0.161276		0.198	-0.11289
0.360002	0.161824		0.2	-0.11272
0.363602	0.162587		0.201	-0.11578
0.367202	0.163434		0.203	-0.11735
0.370802	0.164191		0.205	-0.11738
0.374402	0.164769		0.207	-0.11711
0.378002	0.165138		0.209	-0.11731
0.381602	0.165341		0.211	-0.11656
0.385202	0.165442		0.213	-0.11697
0.388802	0.165502		0.215	-0.11766
0.392403	0.165627		0.217	-0.11659
0.396003	0.165943		0.219	-0.11677
0.399603	0.166533		0.221	-0.11668
0.403203	0.167403		0.223	-0.11626
0.406803	0.168447		0.225	-0.1143
0.410403	0.169525		0.227	-0.11271
0.414003	0.170503		0.229	-0.11337
0.417603	0.171284		0.231	-0.1152
0.421203	0.171778		0.233	-0.11465
0.424803	0.171916		0.235	-0.1146
0.428403	0.171665		0.237	-0.1143
0.432003	0.171111		0.239	-0.11347
0.435603	0.170342		0.241	-0.11342
0.439203	0.169448		0.243	-0.11524
0.442803	0.168435		0.245	-0.11591
0.446403	0.167243		0.247	-0.1049
0.450003	0.165776		0.249	-0.00147
0.453603	0.164048		0.251	-0.00156
0.457203	0.162134		0.253	-0.00124
0.460803	0.160185		0.255	-0.00191
0.464403	0.158457		0.257	-0.00167
0.468003	0.157205		0.259	-0.00243
0.471603	0.156657		0.261	-0.0028
0.475203	0.156913		0.263	-0.00358
0.478803	0.157962		0.265	-0.00518
0.482403	0.159595		0.267	-0.00582
0.486003	0.161509		0.269	-0.00501
0.489603	0.163315		0.271	-0.00566
0.493203	0.164668		0.273	-0.00546
0.496803	0.165305		0.275	-0.00525
0.500403	0.16518		0.277	-0.00656
0.504003	0.164417		0.279	-0.00602
0.507603	0.163249		0.281	-0.00679
0.511203	0.16195		0.283	-0.00875
0.514803	0.160746		0.285	-0.00893
0.518403	0.159822		0.287	-0.00886
0.522003	0.159279		0.289	-0.0078
0.525603	0.159095		0.291	-0.00814
0.529203	0.159142		0.293	-0.00747
0.532803	0.159279		0.295	-0.00743
0.536403	0.159393		0.297	-0.00714
0.540003	0.159452		0.299	-0.00932
0.543603	0.159476		0.301	-0.00921
0.547204	0.159524		0.303	-0.00997
0.550804	0.159726		0.305	-0.01222
0.554404	0.160209		0.307	-0.01342
0.558004	0.161038		0.309	-0.01286
0.561604	0.16217		0.311	-0.01376
0.565204	0.163452		0.313	-0.01469
0.568804	0.164691		0.315	-0.01565
0.572404	0.165693		0.317	-0.0174
0.576004	0.166241		0.319	-0.0167
0.579604	0.166164		0.321	-0.01838
0.583204	0.165365		0.323	-0.02004
0.586804	0.163893		0.325	-0.02118
0.590404	0.16195		0.327	-0.02221
0.594004	0.159804		0.329	-0.02327
0.597604	0.157724		0.331	-0.02384
0.601204	0.15593		0.333	-0.02428
0.604804	0.1546		0.335	-0.02542
0.608404	0.153873		0.337	-0.02465
0.612004	0.153861		0.339	-0.02398
0.615604	0.154618		0.341	-0.02371
0.619204	0.156102		0.343	-0.0234
0.622804	0.158224		0.345	-0.0234
0.626404	0.160817		0.347	-0.024
0.630004	0.16372		0.349	-0.02274
0.633604	0.166772		0.351	-0.02224
0.637204	0.16974		0.353	-0.02188
0.640804	0.172351		0.355	-0.02267
0.644404	0.174335		0.357	-0.02234
0.648004	0.175528		0.359	-0.02185
0.651604	0.175945		0.361	-0.0228
0.655204	0.175736		0.363	-0.02297
0.658804	0.175063		0.365	-0.02283
0.662404	0.174002		0.367	-0.0236
0.666004	0.172643		0.369	-0.02484
0.669604	0.171063		0.371	-0.02467
0.673204	0.169388		0.373	-0.02306
0.676804	0.167707		0.375	-0.02153
0.680404	0.16605		0.377	-0.01982
0.684004	0.16437		0.379	-0.01834
0.687604	0.162695		0.381	-0.02048
0.691204	0.161091		0.383	-0.02122
0.694804	0.159744		0.385	-0.0189
0.698404	0.158808		0.387	-0.01949
0.702004	0.158338		0.389	-0.02068
0.705605	0.158302		0.391	-0.01982
0.709205	0.158624		0.393	-0.01891
0.712805	0.159273		0.395	-0.01785
0.716405	0.160227		0.397	-0.01828
0.720005	0.161449		0.399	-0.01902
0.723605	0.162868		0.401	-0.0187
0.727205	0.164382		0.403	-0.01809
0.730805	0.165872		0.405	-0.00915
0.734405	0.167219		0.407	0.019597
0.738005	0.168339		0.409	0.064557
0.741605	0.16915		0.411	0.114237
0.745205	0.169621		0.413	0.164244
0.748805	0.169728		0.415	0.211892
0.752405	0.169448		0.417	0.254236
0.756005	0.16881		0.419	0.292504
0.759605	0.16788		0.421	0.325825
0.763205	0.16676		0.423	0.357055
0.766805	0.165556		0.425	0.386355
0.770405	0.164352		0.427	0.411061
0.774005	0.163225		0.429	0.429231
0.777605	0.16223		0.431	0.436776
0.781205	0.161455		0.433	0.422629
0.784805	0.16102		0.435	0.396085
0.788405	0.161002		0.437	0.363782
0.792005	0.161437		0.439	0.330021
0.795605	0.162248		0.441	0.299884
0.799205	0.163309		0.443	0.270904
0.802805	0.164471		0.445	0.249168
0.806405	0.165645		0.447	0.227491
0.810005	0.166778		0.449	0.208999
0.813605	0.167797		0.451	0.193872
0.817205	0.168613		0.453	0.179235
0.820805	0.169144		0.455	0.165574
0.824405	0.169358		0.457	0.152629
0.828005	0.169275		0.459	0.141357
0.831605	0.168876		0.461	0.131498
0.835205	0.168107		0.463	0.121153
0.838805	0.166945		0.465	0.112794
0.842405	0.165401		0.467	0.106585
0.846005	0.163625		0.469	0.100383
0.849605	0.161795		0.471	0.09307
0.853205	0.160066		0.473	0.088172
0.856805	0.158582		0.475	0.081575
0.860406	0.157467		0.477	0.07652
0.864006	0.156889		0.479	0.07206
0.867606	0.156991		0.481	0.067113
0.871206	0.157855		0.483	0.063321
0.874806	0.159542		0.485	0.060037
0.878406	0.162051		0.487	0.056243
0.882006	0.165317		0.489	0.05509
0.885606	0.169156		0.491	0.050123
0.889206	0.173233		0.493	0.047703
0.892806	0.177083		0.495	0.045854
0.896406	0.180242		0.497	0.044108
0.900006	0.182281		0.499	0.043076
0.903606	0.182889		0.501	0.041041
0.907206	0.181905		0.503	0.038451
0.910806	0.17942		0.505	0.036668
0.914406	0.17579		0.507	0.035655
0.918006	0.171564		0.509	0.035988
0.921606	0.167302		0.511	0.037794
0.925206	0.163416		0.513	0.038657
0.928806	0.160203		0.515	0.040624
0.932406	0.157837		0.517	0.043039
0.936006	0.156436		0.519	0.046222
0.939606	0.155977		0.521	0.049104
0.943206	0.156287		0.523	0.050724
0.946806	0.157128		0.525	0.052075
0.950406	0.158344		0.527	0.054908
0.954006	0.159899		0.529	0.056738
0.957606	0.16183		0.531	0.057936
0.961206	0.164107		0.533	0.058343
0.964806	0.166581		0.535	0.057518
0.968406	0.169049		0.537	0.055347
0.972006	0.171349		0.539	0.052357
0.975606	0.17334		0.541	0.050448
0.979206	0.174842		0.543	0.0474
0.982806	0.175659		0.545	0.043484
0.986406	0.175635		0.547	0.041482
0.990006	0.174771		0.549	0.038762
0.993606	0.173233		0.551	0.037428
0.997206	0.171308		0.553	0.035728
1.00081	0.169245		0.555	0.033395
1.00441	0.167278		0.557	0.030808
1.00801	0.165568		0.559	0.027203
1.01161	0.164262		0.561	0.025012
1.01521	0.163416		0.563	0.024272
1.01881	0.163011		0.565	0.022594
1.02241	0.162927		0.567	0.020834
1.02601	0.163076		0.569	0.017662
1.02961	0.163416		0.571	0.015681
1.03321	0.164012		0.573	0.013579
1.03681	0.164912		0.575	0.011277
1.04041	0.166134		0.577	0.009799
1.04401	0.167636		0.579	0.008627
1.04761	0.169364		0.581	0.00811
1.05121	0.171272		0.583	0.006913
1.05481	0.173263		0.585	0.005125
1.05841	0.175182		0.587	0.004768
1.06201	0.176857		0.589	0.001808
1.06561	0.178138		0.591	-0.00104
1.06921	0.178961		0.593	-0.00349
1.07281	0.179307		0.595	-0.00483
1.07641	0.179152		0.597	-0.00355
1.08001	0.178448		0.599	-0.00457
1.08361	0.177185		0.601	-0.00551
1.08721	0.175402		0.603	-0.00629
1.09081	0.173197		0.605	-0.00765
1.09441	0.170676		0.607	-0.00832
1.09801	0.167994		0.609	-0.00883
1.10161	0.165395		0.611	-0.00897
1.10521	0.163189		0.613	-0.00966
1.10881	0.161699		0.615	-0.00979
1.11241	0.161181		0.617	-0.00946
1.11601	0.161824		0.619	-0.00974
1.11961	0.163708		0.621	-0.01104
1.12321	0.166778		0.623	-0.01306
1.12681	0.170789		0.625	-0.01463
1.13041	0.175337		0.627	-0.01415
1.13401	0.179914		0.629	-0.01485
1.13761	0.184015		0.631	-0.01488
1.14121	0.187186		0.633	-0.01405
1.14481	0.189111		0.635	-0.01374
1.14841	0.189606		0.637	-0.01431
1.15201	0.188706		0.639	-0.01478
1.15561	0.186632		0.641	-0.0157
1.15921	0.183747		0.643	-0.01627
1.16281	0.180445		0.645	-0.01682
1.16641	0.177071		0.647	-0.01741
1.17001	0.173906		0.649	-0.01772
1.17361	0.171129		0.651	-0.01826
1.17721	0.168852		0.653	-0.01944
1.18081	0.167099		0.655	-0.02143
1.18441	0.165818		0.657	-0.02542
1.18801	0.164924		0.659	-0.02691
1.19161	0.164364		0.661	-0.02921
1.19521	0.164078		0.663	-0.0302
1.19881	0.164054		0.665	-0.03154
1.20241	0.164232		0.667	-0.03234
1.20601	0.164519		0.669	-0.03323
1.20961	0.164817		0.671	-0.03327
1.21321	0.165049		0.673	-0.0336
1.21681	0.16521		0.675	-0.03435
1.22041	0.165365		0.677	-0.03507
1.22401	0.165633		0.679	-0.03511
1.22761	0.166116		0.681	-0.03434
1.23121	0.166837		0.683	-0.03597
1.23481	0.167767		0.685	-0.03689
1.23841	0.168852		0.687	-0.03781
1.24201	0.170002		0.689	-0.03782
1.24561	0.171105		0.691	-0.03798
1.24921	0.171987		0.693	-0.03855
1.25281	0.172518		0.695	-0.03862
1.25641	0.172661		0.697	-0.03809
1.26001	0.172565		0.699	-0.0384
1.26361	0.172494		0.701	-0.03884
1.26721	0.172649		0.703	-0.0406
1.27081	0.173126		0.705	-0.04053
1.27441	0.173924		0.707	-0.03892
1.27801	0.174985		0.709	-0.03754
1.28161	0.176207		0.711	-0.03743
1.28521	0.177411		0.713	-0.03798
1.28881	0.178341		0.715	-0.03859
1.29241	0.178776		0.717	-0.03806
1.29601	0.178603		0.719	-0.03861
1.29961	0.177882		0.721	-0.04102
1.30321	0.176791		0.723	-0.04174
1.30681	0.175516		0.725	-0.04119
1.31041	0.174234		0.727	-0.03984
1.31401	0.17306		0.729	-0.0393
1.31761	0.172059		0.731	-0.0411
1.32121	0.17129		0.733	-0.04266
1.32481	0.170747		0.735	-0.0435
1.32841	0.170413		0.737	-0.04272
1.33201	0.170235		0.739	-0.04198
1.33561	0.170169		0.741	-0.04157
1.33921	0.170235		0.743	-0.04181
1.34281	0.170485		0.745	-0.04113
1.34641	0.171021		0.747	-0.04017
1.35001	0.171898		0.749	-0.04138
1.35361	0.173078		0.751	-0.04272
1.35721	0.174461		0.753	-0.04298
1.36081	0.175933		0.755	-0.04288
1.36441	0.177387		0.757	-0.04372
1.36801	0.178693		0.759	-0.04323
1.37161	0.179706		0.761	-0.04315
1.37521	0.180254		0.763	-0.04456
1.37881	0.18023		0.765	-0.04646
1.38241	0.179652		0.767	-0.04774
1.38601	0.178681		0.769	-0.04882
1.38961	0.177477		0.771	-0.04943
1.39321	0.176255		0.773	-0.05019
1.39681	0.175158		0.775	-0.04998
1.40041	0.174359		0.777	-0.04896
1.40401	0.174008		0.779	-0.04862
1.40761	0.174198		0.781	-0.04925
1.41121	0.174902		0.783	-0.04929
1.41481	0.176022		0.785	-0.04969
1.41841	0.177369		0.787	-0.05009
1.42201	0.178764		0.789	-0.05043
1.42561	0.180028		0.791	-0.05108
1.42921	0.181005		0.793	-0.05176
1.43281	0.181661		0.795	-0.05178
1.43641	0.182066		0.797	-0.05127
1.44001	0.1824		0.799	-0.05295
1.44361	0.182901		0.801	-0.05215
1.44721	0.183741		0.803	-0.05315
1.45081	0.184987		0.805	-0.05294
1.45441	0.186608		0.807	-0.05134
1.45801	0.188456		0.809	-0.04908
1.46161	0.19031		0.811	-0.04783
1.46521	0.191907		0.813	-0.04794
1.46881	0.193033		0.815	-0.04775
1.47241	0.193582		0.817	-0.04725
1.47601	0.193618		0.819	-0.04792
1.47961	0.19329		0.821	-0.04823
1.48321	0.192825		0.823	-0.04901
1.48681	0.192384		0.825	-0.05015
1.49041	0.192002		0.827	-0.05089
1.49401	0.191561		0.829	-0.05179
1.49761	0.190864		0.831	-0.05301
1.50121	0.189708		0.833	-0.0554
1.50481	0.187991		0.835	-0.05754
1.50841	0.185762		0.837	-0.05911
1.51201	0.183193		0.839	-0.0609
1.51561	0.180564		0.841	-0.06292
1.51921	0.178204		0.843	-0.06347
1.52281	0.176499		0.845	-0.06428
1.52641	0.175742		0.847	-0.0639
1.53001	0.176058		0.849	-0.06367
1.53361	0.177334		0.851	-0.0642
1.53721	0.179271		0.853	-0.06393
1.54081	0.181524		0.855	-0.06331
1.54441	0.183795		0.857	-0.06301
1.54801	0.185839		0.859	-0.0614
1.55161	0.18749		0.861	-0.06065
1.55521	0.188587		0.863	-0.06068
1.55881	0.189058		0.865	-0.06046
1.56241	0.188909		0.867	-0.06057
1.56601	0.188235		0.869	-0.0613
1.56961	0.187198		0.871	-0.06259
1.57321	0.185941		0.873	-0.06442
1.57681	0.184611		0.875	-0.06417
1.58041	0.183312		0.877	-0.06357
1.58401	0.182168		0.879	-0.06443
1.58761	0.181291		0.881	-0.06543
1.59121	0.180773		0.883	-0.06612
1.59481	0.180636		0.885	-0.06632
1.59841	0.180838		0.887	-0.06631
1.60201	0.181268		0.889	-0.06661
1.60561	0.181852		0.891	-0.06756
1.60921	0.182537		0.893	-0.06825
1.61281	0.183312		0.895	-0.06745
1.61641	0.184152		0.897	-0.06765
1.62001	0.185064		0.899	-0.06734
1.62361	0.186036		0.901	-0.0675
1.62721	0.187073		0.903	-0.06754
1.63081	0.1882		0.905	-0.06622
1.63441	0.189404		0.907	-0.06467
1.63801	0.190655		0.909	-0.06325
1.64161	0.191889		0.911	-0.06189
1.64521	0.19301		0.913	-0.05984
1.64881	0.193933		0.915	-0.05792
1.65241	0.194571		0.917	-0.05622
1.65601	0.194863		0.919	-0.05597
1.65961	0.194798		0.921	-0.05382
1.66321	0.194398		0.923	-0.05283
1.66681	0.193784		0.925	-0.05174
1.67041	0.193081		0.927	-0.04982
1.67401	0.192396		0.929	-0.04963
1.67761	0.191788		0.931	-0.05121
1.68121	0.191293		0.933	-0.05243
1.68481	0.190947		0.935	-0.05414
1.68841	0.190763		0.937	-0.05527
1.69201	0.190667		0.939	-0.05518
1.69561	0.190566		0.941	-0.05535
1.69921	0.190345		0.943	-0.05674
1.70281	0.189988		0.945	-0.05742
1.70641	0.189529		0.947	-0.0564
1.71001	0.18904		0.949	-0.05785
1.71361	0.188563		0.951	-0.06004
1.71721	0.188074		0.953	-0.06129
1.72081	0.187544		0.955	-0.06219
1.72441	0.186942		0.957	-0.06186
1.72801	0.186256		0.959	-0.06215
1.73161	0.185464		0.961	-0.06241
1.73521	0.184528		0.963	-0.0619
1.73881	0.183413		0.965	-0.06227
1.74241	0.182156		0.967	-0.06218
1.74601	0.180898		0.969	-0.06198
1.74961	0.179813		0.971	-0.06325
1.75321	0.17902		0.973	-0.06397
1.75681	0.178573		0.975	-0.06414
1.76041	0.178454		0.977	-0.0644
1.76401	0.178633		0.979	-0.06436
1.76761	0.17911		0.981	-0.06522
1.77121	0.179861		0.983	-0.06624
1.77481	0.180761		0.985	-0.06674
1.77841	0.181685		0.987	-0.06795
1.78201	0.182543		0.989	-0.06905
1.78561	0.183389		0.991	-0.07041
1.78921	0.184325		0.993	-0.07221
1.79281	0.185452		0.995	-0.07232
1.79641	0.186751		0.997	-0.07157
1.80001	0.1882		0.999	-0.07196
1.80361	0.189803		1.001	-0.07292
1.80721	0.191639		1.003	-0.07353
1.81081	0.193707		1.005	-0.07355
1.81441	0.195853		1.007	-0.07324
1.81801	0.197832		1.009	-0.07419
1.82161	0.199495		1.011	-0.07447
1.82521	0.200848		1.013	-0.0749
1.82881	0.201998		1.015	-0.07603
1.83241	0.203017		1.017	-0.07619
1.83601	0.203834		1.019	-0.07679
1.83961	0.20437		1.021	-0.07787
1.84321	0.204573		1.023	-0.07925
1.84681	0.204489		1.025	-0.07914
1.85041	0.204156		1.027	-0.07837
1.85401	0.203512		1.029	-0.07879
1.85761	0.202457		1.031	-0.08006
1.86121	0.200967		1.033	-0.08038
1.86481	0.199179		1.035	-0.08067
1.86841	0.197331		1.037	-0.0814
1.87201	0.195662		1.039	-0.08119
1.87561	0.194291		1.041	-0.08099
1.87921	0.193242		1.043	-0.08245
1.88281	0.192479		1.045	-0.08388
1.88641	0.191967		1.047	-0.08497
1.89001	0.191615		1.049	-0.08559
1.89361	0.191293		1.051	-0.08583
1.89721	0.190858		1.053	-0.08498
1.90081	0.190226		1.055	-0.0838
1.90441	0.189392		1.057	-0.08407
1.90801	0.188462		1.059	-0.08479
1.91161	0.18758		1.061	-0.08605
1.91521	0.186906		1.063	-0.08597
1.91881	0.186572		1.065	-0.08538
1.92241	0.186632		1.067	-0.085
1.92601	0.187073		1.069	-0.08368
1.92961	0.187818		1.071	-0.08361
1.93321	0.18873		1.073	-0.08293
1.93681	0.189672		1.075	-0.08283
1.94041	0.190459		1.077	-0.0837
1.94401	0.190876		1.079	-0.08522
1.94761	0.190757		1.081	-0.08692
1.95121	0.190041		1.083	-0.08624
1.95481	0.188778		1.085	-0.08587
1.95841	0.187145		1.087	-0.08633
1.96201	0.185303		1.089	-0.0877
1.96561	0.183479		1.091	-0.08901
1.96921	0.181875		1.093	-0.08943
1.97281	0.180725		1.095	-0.08976
1.97641	0.180201		1.097	-0.09133
1.98001	0.180373		1.099	-0.09234
1.98361	0.181166		1.101	-0.09237
1.98721	0.18243		1.103	-0.09312
1.99081	0.183944		1.105	-0.09334
1.99441	0.185493		1.107	-0.09321
1.99801	0.186823		1.109	-0.09407
2.00161	0.187758		1.111	-0.09426
2.00521	0.188205		1.113	-0.09385
2.00881	0.1882		1.115	-0.09425
2.01241	0.187848		1.117	-0.09502
2.01601	0.187294		1.119	-0.09536
2.01961	0.186674		1.121	-0.09576
2.02321	0.186084		1.123	-0.09567
2.02681	0.185565		1.125	-0.09586
2.03041	0.185076		1.127	-0.09547
2.03401	0.184504		1.129	-0.09458
2.03761	0.183741		1.131	-0.09403
2.04121	0.182728		1.133	-0.09362
2.04481	0.181524		1.135	-0.09309
2.04841	0.180278		1.137	-0.09231
2.05201	0.179199		1.139	-0.09198
2.05561	0.178514		1.141	-0.09338
2.05921	0.178401		1.143	-0.09377
2.06281	0.178955		1.145	-0.09223
2.06641	0.180153		1.147	-0.09094
2.07001	0.181852		1.149	-0.09116
2.07361	0.183842		1.151	-0.09169
2.07721	0.185851		1.153	-0.09237
2.08081	0.187586		1.155	-0.09397
2.08441	0.188861		1.157	-0.09495
2.08801	0.189564		1.159	-0.09525
2.09161	0.189761		1.161	-0.09705
2.09521	0.189576		1.163	-0.09757
2.09881	0.189177		1.165	-0.09695
2.10241	0.188736		1.167	-0.09649
2.10601	0.188432		1.169	-0.09632
2.10961	0.188426		1.171	-0.09791
2.11321	0.188807		1.173	-0.09963
2.11681	0.189553		1.175	-0.10021
2.12041	0.190548		1.177	-0.10026
2.12401	0.191657		1.179	-0.10147
2.12761	0.192753		1.181	-0.10185
2.13121	0.193779		1.183	-0.10217
2.13481	0.194679		1.185	-0.10328
2.13841	0.195447		1.187	-0.10394
2.14201	0.196085		1.189	-0.10417
2.14561	0.19661		1.191	-0.10351
2.14921	0.197045		1.193	-0.10342
2.15281	0.197414		1.195	-0.10397
2.15641	0.197677		1.197	-0.10479
2.16001	0.19776		1.199	-0.10559
2.16361	0.197569		1.201	-0.10554
2.16721	0.197051		1.203	-0.10581
2.17081	0.196276		1.205	-0.10634
2.17441	0.195418		1.207	-0.10693
2.17801	0.194679		1.209	-0.10673
2.18161	0.194243		1.211	-0.10592
2.18521	0.194237		1.213	-0.10516
2.18881	0.194768		1.215	-0.10623
2.19241	0.195805		1.217	-0.10672
2.19601	0.197259		1.219	-0.10541
2.19961	0.198863		1.221	-0.10516
2.20321	0.200359		1.223	-0.10563
2.20681	0.201527		1.225	-0.1056
2.21041	0.202284		1.227	-0.10494
2.21401	0.202677		1.229	-0.10375
2.21761	0.202803		1.231	-0.10309
2.22121	0.20285		1.233	-0.10289
2.22481	0.202958		1.235	-0.10246
2.22841	0.203268		1.237	-0.10243
2.23201	0.203816		1.239	-0.10257
2.23561	0.204513		1.241	-0.10294
2.23921	0.205217		1.243	-0.10392
2.24281	0.205765		1.245	-0.10491
2.24641	0.206045		1.247	-0.10461
2.25001	0.20598		1.249	-0.10354
2.25361	0.205574		1.251	-0.10246
2.25721	0.204925		1.253	-0.10213
2.26081	0.20418		1.255	-0.10251
2.26441	0.20347		1.257	-0.10198
2.26802	0.202791		1.259	-0.10217
2.27162	0.20204		1.261	-0.10184
2.27522	0.201092		1.263	-0.10111
2.27881	0.199906		1.265	-0.10075
2.28241	0.198475		1.267	-0.10088
2.28601	0.19683		1.269	-0.09997
2.28961	0.195024		1.271	-0.09874
2.29322	0.193236		1.273	-0.09869
2.29682	0.19171		1.275	-0.09997
2.30042	0.190703		1.277	-0.10123
2.30402	0.190333		1.279	-0.10138
2.30762	0.190512		1.281	-0.10124
2.31121	0.191019		1.283	-0.10108
2.31481	0.191615		1.285	-0.10152
2.31841	0.192074		1.287	-0.10325
2.32201	0.192241		1.289	-0.10364
2.32561	0.191984		1.291	-0.10282
2.32922	0.191299		1.293	-0.10343
2.33282	0.190292		1.295	-0.10372
2.33642	0.189165		1.297	-0.10275
2.34002	0.188176		1.299	-0.10265
2.34361	0.187514		1.301	-0.10298
2.34721	0.187329		1.303	-0.10246
2.35081	0.187645		1.305	-0.10264
2.35441	0.18842		1.307	-0.10317
2.35801	0.189481		1.309	-0.10277
2.36162	0.190602		1.311	-0.10138
2.36522	0.191531		1.313	-0.10057
2.36882	0.192038		1.315	-0.10088
2.37242	0.191978		1.317	-0.10042
2.37602	0.191281		1.319	-0.1009
2.37961	0.189994		1.321	-0.10252
2.38321	0.188271		1.323	-0.10337
2.38681	0.186322		1.325	-0.10316
2.39041	0.184415		1.327	-0.1031
2.39402	0.182787		1.329	-0.10412
2.39762	0.181631		1.331	-0.10469
2.40122	0.181023		1.333	-0.10502
2.40482	0.180946		1.335	-0.10625
2.40842	0.181327		1.337	-0.10704
2.41201	0.18206		1.339	-0.10828
2.41561	0.183008		1.341	-0.10957
2.41921	0.184033		1.343	-0.10931
2.42282	0.185058		1.345	-0.10867
2.42642	0.186048		1.347	-0.10822
2.43002	0.18699		1.349	-0.10826
2.43362	0.187848		1.351	-0.10824
2.43722	0.188581		1.353	-0.10758
2.44082	0.189129		1.355	-0.10703
2.44442	0.189487		1.357	-0.10674
2.44802	0.189696		1.359	-0.10624
2.45162	0.189779		1.361	-0.10591
2.45522	0.189779		1.363	-0.10511
2.45882	0.189761		1.365	-0.10494
2.46242	0.189886		1.367	-0.10493
2.46602	0.190381		1.369	-0.10373
2.46962	0.191388		1.371	-0.10346
2.47322	0.192914		1.373	-0.10374
2.47682	0.194828		1.375	-0.1029
2.48042	0.196914		1.377	-0.10272
2.48402	0.198976		1.379	-0.10425
2.48762	0.200842		1.381	-0.10609
2.49122	0.20235		1.383	-0.1065
2.49482	0.203363		1.385	-0.10606
2.49842	0.203876		1.387	-0.10704
2.50202	0.204019		1.389	-0.10824
2.50562	0.204001		1.391	-0.10908
2.50922	0.203965		1.393	-0.11009
2.51282	0.203965		1.395	-0.11155
2.51642	0.203923		1.397	-0.11309
2.52002	0.203768		1.399	-0.11363
2.52362	0.20344		1.401	-0.11434
2.52722	0.202922		1.403	-0.11408
2.53082	0.202159		1.405	-0.11234
2.53442	0.20111		1.407	-0.11196
2.53802	0.199793		1.409	-0.11235
2.54162	0.198332		1.411	-0.11079
2.54522	0.196896		1.413	-0.10917
2.54882	0.195543		1.415	-0.10843
2.55242	0.194196		1.417	-0.10752
2.55602	0.192759		1.419	-0.10649
2.55962	0.19121		1.421	-0.10566
2.56322	0.189648		1.423	-0.10597
2.56682	0.188176		1.425	-0.10648
2.57042	0.18687		1.427	-0.10616
2.57402	0.185768		1.429	-0.10582
2.57762	0.184999		1.431	-0.10616
2.58122	0.184731		1.433	-0.1066
2.58482	0.185052		1.435	-0.10663
2.58842	0.185875		1.437	-0.1076
2.59202	0.18699		1.439	-0.10952
2.59562	0.188211		1.441	-0.11004
2.59922	0.189427		1.443	-0.1103
2.60282	0.19053		1.445	-0.11089
2.60642	0.1914		1.447	-0.1107
2.61002	0.191943		1.449	-0.10924
2.61362	0.192157		1.451	-0.10944
2.61722	0.192157		1.453	-0.11144
2.62082	0.192068		1.455	-0.11332
2.62442	0.191996		1.457	-0.11453
2.62802	0.191961		1.459	-0.11468
2.63162	0.191984		1.461	-0.11473
2.63522	0.192116		1.463	-0.11394
2.63882	0.192378		1.465	-0.11275
2.64242	0.192729		1.467	-0.11227
2.64602	0.193063		1.469	-0.11157
2.64962	0.193266		1.471	-0.11058
2.65322	0.193278		1.473	-0.10975
2.65682	0.193153		1.475	-0.10907
2.66042	0.192938		1.477	-0.10718
2.66402	0.19267		1.479	-0.10539
2.66762	0.192294		1.481	-0.10557
2.67122	0.191788		1.483	-0.10562
2.67482	0.191156		1.485	-0.10557
2.67842	0.190459		1.487	-0.10481
2.68202	0.189773		1.489	-0.10386
2.68562	0.189165		1.491	-0.10408
2.68922	0.188736		1.493	-0.10469
2.69282	0.188593		1.495	-0.10548
2.69642	0.188861		1.497	-0.10566
2.70002	0.1896		1.499	-0.10601
2.70362	0.190834		1.501	-0.10581
2.70722	0.192473		1.503	-0.10486
2.71082	0.194386		1.504	-0.10385
2.71442	0.196377		1.506	-0.1033
2.71802	0.198279		1.508	-0.10269
2.72162	0.19996		1.51	-0.102
2.72522	0.201354		1.512	-0.10243
2.72882	0.202469		1.514	-0.1022
2.73242	0.203369		1.516	-0.10183
2.73602	0.204114		1.518	-0.10133
2.73962	0.204704		1.52	-0.10079
2.74322	0.205109		1.522	-0.10037
2.74682	0.205288		1.524	-0.10002
2.75042	0.205217		1.526	-0.10047
2.75402	0.204871		1.528	-0.10113
2.75762	0.204209		1.53	-0.10132
2.76122	0.20316		1.532	-0.10137
2.76482	0.201694		1.534	-0.10008
2.76842	0.199822		1.536	-0.09853
2.77202	0.197629		1.538	-0.09791
2.77562	0.195179		1.54	-0.09821
2.77922	0.192503		1.542	-0.09846
2.78282	0.189654		1.544	-0.09807
2.78642	0.186745		1.546	-0.09719
2.79002	0.183938		1.548	-0.09588
2.79362	0.1815		1.55	-0.09527
2.79722	0.179628		1.552	-0.09499
2.80082	0.178502		1.554	-0.09505
2.80442	0.178186		1.556	-0.09403
2.80802	0.178657		1.558	-0.09402
2.81162	0.179789		1.56	-0.09495
2.81522	0.181381		1.562	-0.09528
2.81882	0.183246		1.564	-0.09551
2.82242	0.185184		1.566	-0.09557
2.82602	0.187013		1.568	-0.09627
2.82962	0.188611		1.57	-0.09706
2.83322	0.189928		1.572	-0.09847
2.83682	0.190989		1.574	-0.09904
2.84042	0.191877		1.576	-0.09978
2.84402	0.192664		1.578	-0.10042
2.84762	0.193367		1.58	-0.10031
2.85122	0.193969		1.582	-0.10164
2.85482	0.194458		1.584	-0.1027
2.85842	0.194822		1.586	-0.10221
2.86202	0.195066		1.588	-0.10148
2.86562	0.195179		1.59	-0.10087
2.86922	0.195102		1.592	-0.1008
2.87282	0.194798		1.594	-0.09989
2.87642	0.194267		1.596	-0.09914
2.88002	0.193618		1.598	-0.0974
2.88362	0.192998		1.6	-0.09598
2.88722	0.192539		1.602	-0.09633
2.89082	0.19236		1.604	-0.0971
2.89442	0.192563		1.606	-0.0971
2.89802	0.19323		1.608	-0.09583
2.90162	0.194345		1.61	-0.09524
2.90522	0.195799		1.612	-0.09436
2.90882	0.197385		1.614	-0.09407
2.91242	0.198899		1.616	-0.09326
2.91602	0.200186		1.618	-0.09297
2.91962	0.201181		1.62	-0.09259
2.92322	0.201837		1.622	-0.09318
2.92682	0.202183		1.624	-0.09264
2.93042	0.202266		1.626	-0.09236
2.93402	0.202159		1.628	-0.09213
2.93762	0.201909		1.63	-0.0913
2.94122	0.201515		1.632	-0.09154
2.94482	0.200979		1.634	-0.09075
2.94842	0.200317		1.636	-0.09088
2.95202	0.19956		1.638	-0.09137
2.95562	0.198761		1.64	-0.09035
2.95922	0.197957		1.642	-0.09171
2.96282	0.197242		1.644	-0.09329
2.96642	0.196753		1.646	-0.09331
2.97002	0.19661		1.648	-0.09339
2.97362	0.196854		1.65	-0.09335
2.97722	0.197402		1.652	-0.09196
2.98082	0.198136		1.654	-0.09163
2.98442	0.198928		1.656	-0.09165
2.98802	0.199691		1.658	-0.09117
2.99162	0.200311		1.66	-0.09075
2.99522	0.200615		1.662	-0.09024
2.99882	0.200484		1.664	-0.09
3.00242	0.199882		1.666	-0.09096
3.00602	0.198887		1.668	-0.09063
3.00962	0.197569		1.67	-0.08931
3.01322	0.196026		1.672	-0.0897
3.01682	0.194369		1.674	-0.08992
3.02042	0.192783		1.676	-0.08952
3.02402	0.191466		1.678	-0.08867
3.02762	0.190512		1.68	-0.08822
3.03122	0.189886		1.682	-0.08816
3.03482	0.189541		1.684	-0.08878
3.03842	0.189445		1.686	-0.08788
3.04202	0.18963		1.688	-0.08754
3.04562	0.190071		1.69	-0.08897
3.04922	0.190649		1.692	-0.08797
3.05282	0.191221		1.694	-0.08768
3.05642	0.191752		1.696	-0.0879
3.06002	0.192223		1.698	-0.08818
3.06362	0.192622		1.7	-0.08852
3.06722	0.192771		1.702	-0.08818
3.07082	0.192467		1.704	-0.08779
3.07442	0.191609		1.706	-0.0874
3.07802	0.190226		1.708	-0.08739
3.08162	0.188492		1.71	-0.08753
3.08522	0.186584		1.712	-0.08849
3.08882	0.184683		1.714	-0.08878
3.09242	0.182978		1.716	-0.08811
3.09602	0.181661		1.718	-0.08745
3.09962	0.180898		1.72	-0.0862
3.10322	0.180731		1.722	-0.08544
3.10682	0.181101		1.724	-0.08528
3.11042	0.181864		1.726	-0.08538
3.11402	0.182913		1.728	-0.08542
3.11762	0.184176		1.73	-0.08544
3.12122	0.185601		1.732	-0.08564
3.12482	0.187162		1.734	-0.08611
3.12842	0.188837		1.736	-0.0855
3.13202	0.190608		1.738	-0.08446
3.13562	0.192425		1.74	-0.08394
3.13922	0.194178		1.742	-0.08427
3.14282	0.19568		1.744	-0.08415
3.14642	0.196735		1.746	-0.08446
3.15002	0.197242		1.748	-0.08505
3.15362	0.19717		1.75	-0.08459
3.15722	0.196586		1.752	-0.08414
3.16082	0.195561		1.754	-0.08404
3.16442	0.19419		1.756	-0.08416
3.16802	0.192574		1.758	-0.08418
3.17162	0.190858		1.76	-0.08332
3.17522	0.189153		1.762	-0.08274
3.17882	0.187532		1.764	-0.08226
3.18242	0.185994		1.766	-0.08154
3.18602	0.184587		1.768	-0.08055
3.18962	0.183383		1.77	-0.0793
3.19322	0.182531		1.772	-0.07742
3.19682	0.182168		1.774	-0.07639
3.20042	0.182394		1.776	-0.07563
3.20402	0.18327		1.778	-0.07487
3.20762	0.184742		1.78	-0.0738
3.21122	0.186703		1.782	-0.07379
3.21482	0.188927		1.784	-0.07207
3.21842	0.191144		1.786	-0.07142
3.22202	0.193075		1.788	-0.07302
3.22562	0.19453		1.79	-0.07353
3.22922	0.195346		1.792	-0.07404
3.23282	0.195465		1.794	-0.07559
3.23642	0.194917		1.796	-0.07656
3.24002	0.193832		1.798	-0.07717
3.24362	0.192437		1.8	-0.07683
3.24722	0.190971		1.802	-0.07673
3.25082	0.189624		1.804	-0.07612
3.25442	0.188563		1.806	-0.07518
3.25802	0.187896		1.808	-0.07541
3.26162	0.187705		1.81	-0.0759
3.26522	0.187961		1.812	-0.0749
3.26882	0.188569		1.814	-0.07395
3.27242	0.189344		1.816	-0.07312
3.27602	0.190113		1.818	-0.0712
3.27962	0.190751		1.82	-0.07057
3.28322	0.191192		1.822	-0.07022
3.28682	0.191424		1.824	-0.06997
3.29042	0.191484		1.826	-0.06925
3.29402	0.191436		1.828	-0.06957
3.29762	0.1914		1.83	-0.06992
3.30122	0.191478		1.832	-0.07082
3.30482	0.19177		1.834	-0.07084
3.30842	0.192324		1.836	-0.07015
3.31202	0.193123		1.838	-0.0702
3.31562	0.194059		1.84	-0.07081
3.31922	0.195012		1.842	-0.07127
3.32282	0.195894		1.844	-0.07117
3.32642	0.196657		1.846	-0.07285
3.33002	0.197259		1.848	-0.07398
3.33362	0.197611		1.85	-0.07465
3.33722	0.197647		1.852	-0.07605
3.34082	0.197343		1.854	-0.07625
3.34442	0.196753		1.856	-0.07673
3.34802	0.195918		1.858	-0.07638
3.35162	0.194857		1.86	-0.07633
3.35522	0.193558		1.862	-0.07495
3.35882	0.192098		1.864	-0.07397
3.36242	0.190572		1.866	-0.07404
3.36602	0.189141		1.868	-0.07405
3.36962	0.187919		1.87	-0.07208
3.37322	0.187013		1.872	-0.07096
3.37682	0.186519		1.874	-0.07026
3.38042	0.186507		1.876	-0.06771
3.38402	0.18699		1.878	-0.06785
3.38762	0.187896		1.88	-0.06777
3.39122	0.189111		1.882	-0.06762
3.39482	0.190524		1.884	-0.06786
3.39842	0.192014		1.886	-0.06817
3.40202	0.193433		1.888	-0.06826
3.40562	0.194637		1.89	-0.06798
3.40922	0.195507		1.892	-0.06908
3.41282	0.19602		1.894	-0.0697
3.41642	0.196192		1.896	-0.06975
3.42002	0.196067		1.898	-0.06927
3.42362	0.195674		1.9	-0.06907
3.42722	0.194994		1.902	-0.06862
3.43082	0.194071		1.904	-0.06747
3.43442	0.192974		1.906	-0.06596
3.43802	0.1918		1.908	-0.06464
3.44162	0.190679		1.91	-0.06436
3.44522	0.189761		1.912	-0.06461
3.44882	0.189201		1.914	-0.06552
3.45242	0.189135		1.916	-0.06551
3.45602	0.189576		1.918	-0.06428
3.45962	0.190429		1.92	-0.06367
3.46322	0.19146		1.922	-0.06374
3.46682	0.192396		1.924	-0.06282
3.47042	0.192938		1.926	-0.06198
3.47402	0.192819		1.928	-0.06146
3.47762	0.191835		1.93	-0.06207
3.48122	0.18994		1.932	-0.06305
3.48482	0.187317		1.934	-0.06252
3.48842	0.184319		1.936	-0.06194
3.49202	0.181375		1.938	-0.06091
3.49562	0.178854		1.94	-0.0603
3.49922	0.177		1.942	-0.05916
3.50282	0.175933		1.944	-0.05899
3.50642	0.175671		1.946	-0.05921
3.51002	0.176094		1.948	-0.0592
3.51362	0.176964		1.95	-0.05968
3.51722	0.177989		1.952	-0.05911
3.52082	0.178919		1.954	-0.05888
3.52442	0.179658		1.956	-0.05913
3.52802	0.180195		1.958	-0.06006
3.53162	0.180594		1.96	-0.06122
3.53522	0.180922		1.962	-0.06135
3.53882	0.181196		1.964	-0.06129
3.54242	0.181452		1.966	-0.06035
3.54602	0.181667		1.968	-0.06077
3.54962	0.181744		1.97	-0.06232
3.55322	0.181566		1.972	-0.0624
3.55682	0.181011		1.974	-0.06196
3.56042	0.180063		1.976	-0.06147
3.56402	0.178806		1.978	-0.06216
3.56762	0.177399		1.98	-0.0616
3.57122	0.176064		1.982	-0.05965
3.57482	0.175069		1.984	-0.06003
3.57842	0.174723		1.986	-0.05973
3.58202	0.175301		1.988	-0.06011
3.58562	0.176916		1.99	-0.06045
3.58922	0.179497		1.992	-0.05986
3.59282	0.182776		1.994	-0.05826
3.59642	0.186394		1.996	-0.05753
3.60002	0.189976		1.998	-0.05982
3.60362	0.193123		2	-0.06108
3.60722	0.195441		2.002	-0.06085
3.61082	0.19664		2.004	-0.06173
3.61442	0.196592		2.006	-0.06344
3.61802	0.195376		2.008	-0.06312
3.62162	0.193218		2.01	-0.06152
3.62522	0.190411		2.012	-0.06142
3.62882	0.187288		2.014	-0.06154
3.63242	0.18417		2.016	-0.06174
3.63602	0.181422		2.018	-0.06244
3.63962	0.179384		2.02	-0.06262
3.64322	0.178305		2.022	-0.06118
3.64682	0.178329		2.024	-0.05902
3.65042	0.179456		2.026	-0.05826
3.65402	0.181577		2.028	-0.05814
3.65762	0.184528		2.03	-0.05679
3.66122	0.188003		2.032	-0.05583
3.66482	0.191627		2.034	-0.05523
3.66842	0.194965		2.036	-0.05413
3.67202	0.197653		2.038	-0.05531
3.67562	0.199495		2.04	-0.05586
3.67922	0.200413		2.042	-0.05513
3.68282	0.200478		2.044	-0.05365
3.68642	0.199828		2.046	-0.05255
3.69002	0.198708		2.048	-0.05169
3.69362	0.197355		2.05	-0.05239
3.69722	0.19599		2.052	-0.0517
3.70082	0.194708		2.054	-0.05239
3.70442	0.19348		2.056	-0.0534
3.70802	0.192229		2.058	-0.05327
3.71162	0.190906		2.06	-0.05418
3.71522	0.189481		2.062	-0.05374
3.71882	0.187985		2.064	-0.05265
3.72242	0.186453		2.066	-0.05158
3.72602	0.184993		2.068	-0.05169
3.72962	0.183705		2.07	-0.05265
3.73322	0.182716		2.072	-0.05339
3.73682	0.182084		2.074	-0.05273
3.74042	0.18178		2.076	-0.05189
3.74402	0.181721		2.078	-0.05148
3.74762	0.181852		2.08	-0.05083
3.75122	0.18212		2.082	-0.04975
3.75482	0.182525		2.084	-0.04881
3.75842	0.183032		2.086	-0.04971
3.76202	0.183628		2.088	-0.04998
3.76562	0.184307		2.09	-0.04939
3.76922	0.185112		2.092	-0.04968
3.77282	0.186012		2.094	-0.05015
3.77642	0.186966		2.096	-0.04973
3.78002	0.187818		2.098	-0.05084
3.78362	0.188402		2.1	-0.05228
3.78722	0.188605		2.102	-0.05197
3.79082	0.18839		2.104	-0.05148
3.79442	0.187776		2.106	-0.05065
3.79802	0.186793		2.108	-0.05158
3.80162	0.185505		2.11	-0.05029
3.80522	0.184063		2.112	-0.0499
3.80882	0.182686		2.114	-0.04894
3.81242	0.181566		2.116	-0.04842
3.81602	0.180791		2.118	-0.0483
3.81962	0.180296		2.12	-0.04801
3.82322	0.179998		2.122	-0.04657
3.82682	0.179855		2.124	-0.04496
3.83042	0.179843		2.126	-0.04472
3.83403	0.179944		2.128	-0.04432
3.83763	0.180093		2.13	-0.04383
3.84123	0.180332		2.132	-0.0432
3.84483	0.180791		2.134	-0.04326
3.84843	0.181673		2.136	-0.04506
3.85202	0.183085		2.138	-0.04723
3.85562	0.18504		2.14	-0.04814
3.85922	0.187419		2.142	-0.04888
3.86282	0.190053		2.144	-0.04981
3.86643	0.192706		2.146	-0.04976
3.87003	0.19512		2.148	-0.04921
3.87363	0.197021		2.15	-0.04869
3.87723	0.198195		2.152	-0.0497
3.88083	0.198559		2.154	-0.05073
3.88442	0.198106		2.156	-0.05044
3.88802	0.19692		2.158	-0.04936
3.89162	0.195143		2.16	-0.04823
3.89522	0.192986		2.162	-0.04669
3.89882	0.190673		2.164	-0.0437
3.90243	0.188408		2.166	-0.04256
3.90603	0.18631		2.168	-0.04249
3.90963	0.184462		2.17	-0.0424
3.91323	0.182901		2.172	-0.04204
3.91682	0.181655		2.174	-0.04226
3.92042	0.180743		2.176	-0.04172
3.92402	0.180111		2.178	-0.04086
3.92762	0.179712		2.18	-0.03972
3.93122	0.179503		2.182	-0.03981
3.93483	0.179491		2.184	-0.04034
3.93843	0.1797		2.186	-0.04089
3.94203	0.180135		2.188	-0.04138
3.94563	0.180803		2.19	-0.04109
3.94923	0.181625		2.192	-0.04194
3.95282	0.182531		2.194	-0.04051
3.95642	0.183437		2.196	-0.04083
3.96002	0.184224		2.198	-0.04255
3.96362	0.184832		2.2	-0.0409
3.96723	0.185184		2.202	-0.04126
3.97083	0.185219		2.204	-0.04071
3.97443	0.184945		2.206	-0.03991
3.97803	0.184456		2.208	-0.03926
3.98163	0.183902		2.21	-0.03889
3.98523	0.183467		2.212	-0.03787
3.98883	0.183258		2.214	-0.03735
3.99243	0.1833		2.216	-0.0372
3.99603	0.183538		2.218	-0.03725
3.99963	0.183908		2.22	-0.03577
4.00323	0.184319		2.222	-0.03615
4.00683	0.184665		2.224	-0.03667
4.01043	0.184748		2.226	-0.03693
4.01403	0.184391		2.228	-0.03685
4.01763	0.183515		2.23	-0.03611
4.02123	0.182197		2.232	-0.03691
4.02483	0.180618		2.234	-0.03707
4.02843	0.178979		2.236	-0.03667
4.03203	0.177393		2.238	-0.03781
4.03563	0.175969		2.24	-0.03937
4.03923	0.17483		2.242	-0.03948
4.04283	0.174127		2.244	-0.03983
4.04643	0.17396		2.246	-0.03827
4.05003	0.174324		2.248	-0.03685
4.05363	0.175092		2.25	-0.03561
4.05723	0.176165		2.252	-0.03536
4.06083	0.177483		2.254	-0.035
4.06443	0.179026		2.256	-0.03525
4.06803	0.180767		2.258	-0.03395
4.07163	0.182573		2.26	-0.03459
4.07523	0.184266		2.262	-0.03218
4.07883	0.185666		2.264	-0.03026
4.08243	0.186644		2.266	-0.02994
4.08603	0.187109		2.268	-0.02972
4.08963	0.187001		2.27	-0.02952
4.09323	0.186274		2.272	-0.02985
4.09683	0.184999		2.274	-0.02935
4.10043	0.183348		2.276	-0.02879
4.10403	0.181601		2.278	-0.02886
4.10763	0.180052		2.28	-0.02824
4.11123	0.178913		2.282	-0.02856
4.11483	0.178389		2.284	-0.02823
4.11843	0.178532		2.286	-0.02871
4.12203	0.179301		2.288	-0.02882
4.12563	0.180522		2.29	-0.02796
4.12923	0.181983		2.292	-0.02739
4.13283	0.183455		2.294	-0.02577
4.13643	0.18482		2.296	-0.027
4.14003	0.185988		2.298	-0.0278
4.14363	0.1869		2.3	-0.02705
4.14723	0.187502		2.302	-0.02646
4.15083	0.187747		2.304	-0.0266
4.15443	0.187627		2.306	-0.02717
4.15803	0.187145		2.308	-0.02689
4.16163	0.186334		2.31	-0.02703
4.16523	0.185213		2.312	-0.02587
4.16883	0.18383		2.314	-0.02708
4.17243	0.182305		2.316	-0.02508
4.17603	0.180797		2.318	-0.02528
4.17963	0.179521		2.32	-0.02567
4.18323	0.178663		2.322	-0.02454
4.18683	0.178305		2.324	-0.02386
4.19043	0.178436		2.326	-0.02404
4.19403	0.178931		2.328	-0.02497
4.19763	0.179658		2.33	-0.0236
4.20123	0.180522		2.332	-0.0228
4.20483	0.181482		2.334	-0.02415
4.20843	0.182525		2.336	-0.02334
4.21203	0.183616		2.338	-0.02268
4.21563	0.184713		2.34	-0.02224
4.21923	0.18578		2.342	-0.02217
4.22283	0.186823		2.344	-0.02318
4.22643	0.187794		2.346	-0.02262
4.23003	0.188557		2.348	-0.02185
4.23363	0.188939		2.35	-0.02117
4.23723	0.18879		2.352	-0.02007
4.24083	0.188122		2.354	-0.0216
4.24443	0.187067		2.356	-0.02104
4.24803	0.185815		2.358	-0.02
4.25163	0.184534		2.36	-0.01802
4.25523	0.183318		2.362	-0.01905
4.25883	0.182227		2.364	-0.02066
4.26243	0.181291		2.366	-0.02124
4.26603	0.180528		2.368	-0.02039
4.26963	0.179873		2.37	-0.01979
4.27323	0.179223		2.372	-0.01743
4.27683	0.17849		2.374	-0.01734
4.28043	0.177667		2.376	-0.01812
4.28403	0.176809		2.378	-0.01789
4.28763	0.17604		2.38	-0.01685
4.29123	0.175498		2.382	-0.01524
4.29483	0.175313		2.384	-0.0149
4.29843	0.175575		2.386	-0.01458
4.30203	0.17635		2.388	-0.01499
4.30563	0.17756		2.39	-0.01331
4.30923	0.179026		2.392	-0.01308
4.31283	0.180505		2.394	-0.01347
4.31643	0.181721		2.396	-0.01435
4.32003	0.182448		2.398	-0.01564
4.32363	0.182507		2.4	-0.01516
4.32723	0.181792		2.402	-0.01421
4.33083	0.180278		2.404	-0.01324
4.33443	0.178162		2.406	-0.01383
4.33803	0.17576		2.408	-0.01507
4.34163	0.173459		2.41	-0.01427
4.34523	0.171582		2.412	-0.01385
4.34883	0.1703		2.414	-0.01325
4.35243	0.169722		2.416	-0.01241
4.35603	0.169895		2.418	-0.01261
4.35963	0.170801		2.42	-0.0124
4.36323	0.172309		2.422	-0.01271
4.36683	0.174157		2.424	-0.01222
4.37043	0.176058		2.426	-0.01302
4.37403	0.177793		2.428	-0.01327
4.37763	0.179253		2.43	-0.01388
4.38123	0.180379		2.432	-0.01418
4.38483	0.181101		2.434	-0.01366
4.38843	0.181357		2.436	-0.01427
4.39203	0.181107		2.438	-0.01185
4.39563	0.180379		2.44	-0.0134
4.39923	0.179199		2.442	-0.01335
4.40283	0.177578		2.444	-0.01416
4.40643	0.175545		2.446	-0.01491
4.41003	0.173191		2.448	-0.01396
4.41363	0.170646		2.45	-0.01304
4.41723	0.168107		2.452	-0.01203
4.42083	0.165782		2.454	-0.01262
4.42443	0.163934		2.456	-0.01263
4.42803	0.162832		2.458	-0.01145
4.43163	0.162677		2.46	-0.01105
4.43523	0.163511		2.462	-0.01181
4.43883	0.165156		2.464	-0.01165
4.44243	0.167278		2.466	-0.01036
4.44603	0.169519		2.468	-0.00898
4.44963	0.171534		2.47	-0.0083
4.45323	0.173042		2.472	-0.00742
4.45683	0.173847		2.474	-0.00745
4.46043	0.1739		2.476	-0.00789
4.46403	0.173334		2.478	-0.00766
4.46763	0.172434		2.48	-0.00628
4.47123	0.171504		2.482	-0.0057
4.47483	0.170759		2.484	-0.00544
4.47843	0.170306		2.486	-0.00517
4.48203	0.170121		2.488	-0.00362
4.48563	0.170115		2.49	-0.00376
4.48923	0.170133		2.492	-0.00412
4.49283	0.169996		2.494	-0.00489
4.49643	0.169579		2.496	-0.00395
4.50003	0.168846		2.498	-0.00398
4.50363	0.167856		2.5	-0.00356
4.50723	0.166724		2.502	-0.00259
4.51083	0.165603		2.504	-0.00418
4.51443	0.164656		2.506	-0.00371
4.51803	0.164083		2.508	-0.00377
4.52163	0.164048		2.51	-0.00412
4.52523	0.164584		2.512	-0.0045
4.52883	0.165597		2.514	-0.0039
4.53243	0.166861		2.516	-0.00472
4.53603	0.168184		2.518	-0.00404
4.53963	0.169394		2.52	-0.00414
4.54323	0.170318		2.522	-0.00323
4.54683	0.170819		2.524	-0.00261
4.55043	0.170819		2.526	-0.00303
4.55403	0.170336		2.528	-0.00276
4.55763	0.169502		2.53	-0.00102
4.56123	0.168506		2.532	-0.00016
4.56483	0.167511		2.534	0.000362
4.56843	0.166688		2.536	0.000795
4.57203	0.166152		2.538	2.32e-05
4.57563	0.165919		2.54	0.000144
4.57923	0.165919		2.542	0.000698
4.58283	0.166039		2.544	0.000203
4.58643	0.166241		2.546	-0.00017
4.59003	0.166557		2.548	0.000939
4.59363	0.16701		2.55	0.001024
4.59723	0.167582		2.552	0.001526
4.60083	0.168244		2.554	0.001193
4.60443	0.169055		2.556	0.000637
4.60803	0.170115		2.558	0.000572
4.61163	0.17148		2.56	0.001944
4.61523	0.173018		2.562	0.002164
4.61883	0.174467		2.564	0.003469
4.62243	0.175641		2.566	0.003993
4.62603	0.176416		2.568	0.004715
4.62963	0.176767		2.57	0.005234
4.63323	0.176684		2.572	0.004261
4.63683	0.176159		2.574	0.004279
4.64043	0.175277		2.576	0.003973
4.64403	0.174216		2.578	0.004237
4.64763	0.173209		2.58	0.004938
4.65123	0.172392		2.582	0.007103
4.65483	0.17182		2.584	0.008082
4.65843	0.171474		2.586	0.006308
4.66203	0.171302		2.588	0.007132
4.66563	0.171248		2.59	0.008161
4.66923	0.171296		2.592	0.008542
4.67283	0.17148		2.594	0.008749
4.67643	0.171844		2.596	0.009053
4.68003	0.172476		2.598	0.00864
4.68363	0.173453		2.6	0.007388
4.68723	0.174794		2.602	0.007696
4.69083	0.176445		2.604	0.008389
4.69443	0.178305		2.606	0.007977
4.69803	0.180213		2.608	0.007644
4.70163	0.182019		2.61	0.008074
4.70523	0.183544		2.612	0.008551
4.70883	0.184635		2.614	0.006586
4.71243	0.185172		2.616	0.006946
4.71603	0.185112		2.618	0.007959
4.71963	0.18448		2.62	0.008088
4.72323	0.183342		2.622	0.008562
4.72683	0.181744		2.624	0.011397
4.73043	0.179789		2.626	0.012515
4.73403	0.177626		2.628	0.014084
4.73763	0.17545		2.63	0.013642
4.74123	0.173459		2.632	0.012758
4.74483	0.17179		2.634	0.01405
4.74843	0.170574		2.636	0.015132
4.75203	0.169841		2.638	0.015175
4.75563	0.169603		2.64	0.016017
4.75923	0.169776		2.642	0.016233
4.76283	0.170181		2.644	0.014925
4.76643	0.170634		2.646	0.016422
4.77003	0.170974		2.648	0.017821
4.77363	0.171081		2.65	0.018983
4.77723	0.170914		2.652	0.018308
4.78083	0.170473		2.654	0.017913
4.78443	0.169817		2.656	0.017497
4.78803	0.169019		2.658	0.015845
4.79163	0.168184		2.66	0.015672
4.79523	0.167403		2.662	0.014536
4.79883	0.166742		2.664	0.015243
4.80243	0.166265		2.666	0.015704
4.80603	0.166009		2.668	0.016669
4.80963	0.165973		2.67	0.016747
4.81323	0.166098		2.672	0.016222
4.81683	0.166307		2.674	0.015407
4.82043	0.166527		2.676	0.015625
4.82403	0.16667		2.678	0.016002
4.82763	0.166652		2.68	0.016594
4.83123	0.16639		2.682	0.018083
4.83483	0.16586		2.684	0.020239
4.83843	0.165061		2.686	0.021101
4.84203	0.164095		2.688	0.021096
4.84563	0.163082		2.69	0.022217
4.84923	0.162128		2.692	0.023776
4.85283	0.1613		2.694	0.023239
4.85643	0.160662		2.696	0.021461
4.86003	0.160239		2.698	0.021312
4.86363	0.16003		2.7	0.021001
4.86723	0.159959		2.702	0.021924
4.87083	0.159935		2.704	0.022577
4.87443	0.159858		2.706	0.022686
4.87803	0.159691		2.708	0.020967
4.88163	0.159416		2.71	0.019109
4.88523	0.159053		2.712	0.018301
4.88883	0.15863		2.714	0.01663
4.89243	0.158195		2.716	0.016895
4.89603	0.157807		2.718	0.018256
4.89963	0.157521		2.72	0.017669
4.90323	0.157402		2.722	0.019907
4.90683	0.157497		2.724	0.020393
4.91043	0.157819		2.726	0.020136
4.91403	0.158332		2.728	0.021262
4.91763	0.158987		2.73	0.02287
4.92123	0.159762		2.732	0.023826
4.92483	0.160662		2.734	0.02478
4.92843	0.161699		2.736	0.025152
4.93203	0.162909		2.738	0.026789
4.93563	0.16434		2.74	0.026512
4.93923	0.166039		2.742	0.026188
4.94283	0.168047		2.744	0.025702
4.94643	0.170288		2.746	0.025913
4.95003	0.172595		2.748	0.025229
4.95363	0.174729		2.75	0.02457
4.95723	0.176428		2.752	0.025644
4.96083	0.177477		2.754	0.023672
4.96443	0.177733		2.756	0.023695
4.96803	0.177197		2.758	0.024143
4.97163	0.176034		2.76	0.024746
4.97523	0.174538		2.762	0.024457
4.97883	0.17303		2.764	0.024636
4.98243	0.171749		2.766	0.023584
4.98603	0.170825		2.768	0.024109
4.98963	0.170294		2.77	0.024154
4.99323	0.170062		2.772	0.024321
4.99683	0.169955		2.774	0.026039
5.00043	0.169698		2.776	0.025256
5.00403	0.16909		2.778	0.025386
5.00763	0.168095		2.78	0.02509
5.01123	0.166849		2.782	0.02395
5.01483	0.165586		2.784	0.022905
5.01843	0.164536		2.786	0.02097
5.02203	0.163869		2.788	0.020252
5.02563	0.163666		2.79	0.021401
5.02923	0.163923		2.792	0.020546
5.03283	0.164489		2.794	0.021726
5.03643	0.165144		2.796	0.020219
5.04003	0.165687		2.798	0.020139
5.04363	0.166027		2.8	0.019405
5.04723	0.166247		2.802	0.021325
5.05083	0.166515		2.804	0.020084
5.05443	0.16707		2.806	0.021167
5.05803	0.168077		2.807	0.022499
5.06163	0.169597		2.809	0.02333
5.06523	0.171534		2.811	0.024144
5.06883	0.173638		2.813	0.023775
5.07243	0.175539		2.815	0.02301
5.07603	0.176797		2.817	0.024599
5.07963	0.17703		2.819	0.02306
5.08323	0.176034		2.821	0.022256
5.08683	0.173906		2.823	0.021719
5.09043	0.170968		2.825	0.020765
5.09403	0.167701		2.827	0.020818
5.09763	0.16456		2.829	0.019719
5.10123	0.161932		2.831	0.019697
5.10483	0.160114		2.833	0.019644
5.10843	0.159285		2.835	0.020782
5.11203	0.15944		2.837	0.020166
5.11563	0.160394		2.839	0.02039
5.11923	0.161842		2.841	0.019345
5.12283	0.163541		2.843	0.018526
5.12643	0.165335		2.845	0.019397
5.13003	0.167195		2.847	0.02042
5.13363	0.169066		2.849	0.020027
5.13723	0.170831		2.851	0.018952
5.14083	0.172327		2.853	0.018315
5.14443	0.173412		2.855	0.018355
5.14803	0.17393		2.857	0.018868
5.15163	0.173745		2.859	0.018251
5.15523	0.17275		2.861	0.019746
5.15883	0.17095		2.863	0.018807
5.16243	0.16847		2.865	0.018649
5.16603	0.16555		2.867	0.018081
5.16963	0.16245		2.869	0.019724
5.17323	0.15944		2.871	0.020272
5.17683	0.156794		2.873	0.022166
5.18043	0.15472		2.875	0.021055
5.18403	0.153384		2.877	0.020746
5.18763	0.152824		2.879	0.020418
5.19123	0.153039		2.881	0.01891
5.19483	0.154022		2.883	0.018002
5.19843	0.155751		2.885	0.016739
5.20203	0.158212		2.887	0.014985
5.20563	0.161258		2.889	0.01692
5.20923	0.164656		2.891	0.017824
5.21283	0.168089		2.893	0.016736
5.21643	0.171248		2.895	0.016114
5.22003	0.173775		2.897	0.014339
5.22363	0.175379		2.899	0.013752
5.22723	0.175838		2.901	0.012652
5.23083	0.175081		2.903	0.01306
5.23443	0.173263		2.905	0.012581
5.23803	0.170706		2.907	0.01383
5.24163	0.167809		2.909	0.014007
5.24523	0.164989		2.911	0.013476
5.24883	0.162587		2.913	0.013474
5.25243	0.160847		2.915	0.013803
5.25603	0.159858		2.917	0.012849
5.25963	0.159595		2.919	0.012406
5.26323	0.159917		2.921	0.012337
5.26683	0.160662		2.923	0.011693
5.27043	0.161687		2.925	0.013054
5.27403	0.162874		2.927	0.01276
5.27763	0.164131		2.929	0.013504
5.28123	0.165383		2.931	0.014027
5.28483	0.166551		2.933	0.013795
5.28843	0.167517		2.935	0.015391
5.29203	0.168143		2.937	0.015651
5.29563	0.168256		2.939	0.015533
5.29923	0.167713		2.941	0.014896
5.30283	0.166456		2.943	0.014629
5.30643	0.164501		2.945	0.014383
5.31003	0.161985		2.947	0.013963
5.31363	0.15913		2.949	0.013711
5.31723	0.156263		2.951	0.013308
5.32083	0.153724		2.953	0.013872
5.32443	0.15187		2.955	0.013924
5.32803	0.150923		2.957	0.012634
5.33163	0.151024		2.959	0.012393
5.33523	0.15218		2.961	0.012993
5.33883	0.154302		2.963	0.012435
5.34243	0.157187		2.965	0.012508
5.34603	0.160585		2.967	0.011067
5.34963	0.164185		2.969	0.009965
5.35323	0.167701		2.971	0.010567
5.35683	0.170896		2.973	0.011964
5.36043	0.173602		2.975	0.010826
5.36403	0.1757		2.977	0.010947
5.36763	0.177131		2.979	0.009571
5.37123	0.177864		2.981	0.009834
5.37483	0.177906		2.983	0.011322
5.37843	0.177328		2.985	0.010048
5.38203	0.176237		2.987	0.007947
5.38563	0.174735		2.989	0.007413
5.38923	0.172965		2.991	0.008009
5.39283	0.171033		2.993	0.010501
5.39644	0.16906		2.995	0.010513
5.40003	0.167207		2.997	0.010848
5.40364	0.165591		2.999	0.011336
5.40724	0.16425		3.001	0.01042
5.41083	0.163183		3.003	0.010091
5.41444	0.162331		3.005	0.008665
5.41803	0.161658		3.007	0.009474
5.42164	0.161175		3.009	0.008599
5.42523	0.160883		3.011	0.008296
5.42884	0.160769		3.013	0.009014
5.43243	0.160823		3.015	0.009428
5.43604	0.161026		3.017	0.009764
5.43963	0.161354		3.019	0.009829
5.44323	0.161723		3.021	0.008591
5.44684	0.162015		3.023	0.006311
5.45043	0.162057		3.025	0.005763
5.45404	0.161699		3.027	0.004474
5.45763	0.160877		3.029	0.005307
5.46124	0.159667		3.031	0.00686
5.46483	0.15823		3.033	0.005557
5.46844	0.156794		3.035	0.004206
5.47203	0.155614		3.037	0.003295
5.47563	0.154946		3.039	0.002399
5.47924	0.154982		3.041	0.000656
5.48283	0.155804		3.043	-0.00091
5.48644	0.157366		3.045	-0.00051
5.49003	0.159506		3.047	-0.00086
5.49364	0.161973		3.049	2.23e-05
5.49723	0.164483		3.051	0.00201
5.50084	0.166784		3.053	0.001885
5.50443	0.168685		3.055	0.000811
5.50803	0.170074		3.057	-0.00137
5.51164	0.170962		3.059	0.000137
5.51523	0.171427		3.061	0.00023
5.51884	0.171629		3.063	0.000324
5.52243	0.171701		3.065	0.000686
5.52604	0.171761		3.067	0.00111
5.52963	0.171868		3.069	0.000724
5.53324	0.172053		3.071	0.000185
5.53683	0.172327		3.073	0.000349
5.54044	0.172631		3.075	-0.00133
5.54404	0.172887		3.077	-0.00113
5.54764	0.172976		3.079	-0.00195
5.55124	0.172774		3.081	-0.00228
5.55484	0.172225		3.083	-0.00273
5.55844	0.171325		3.085	-0.00319
5.56204	0.17008		3.087	-0.0024
5.56564	0.16853		3.089	-0.00359
5.56924	0.166736		3.091	-0.00341
5.57284	0.164799		3.093	-0.00509
5.57644	0.162891		3.095	-0.00652
5.58004	0.161199		3.097	-0.00652
5.58364	0.159887		3.099	-0.00653
5.58724	0.159071		3.101	-0.00798
5.59084	0.15882		3.103	-0.00899
5.59444	0.159166		3.105	-0.0085
5.59804	0.16015		3.107	-0.00802
5.60164	0.161729		3.109	-0.00946
5.60524	0.163774		3.111	-0.00986
5.60884	0.166033		3.113	-0.00956
5.61244	0.168214		3.115	-0.01096
5.61604	0.170038		3.117	-0.01127
5.61964	0.171278		3.119	-0.0099
5.62324	0.171784		3.121	-0.00907
5.62684	0.17151		3.123	-0.00992
5.63044	0.170509		3.125	-0.00934
5.63404	0.168953		3.127	-0.00819
5.63764	0.16707		3.129	-0.00945
5.64124	0.16518		3.131	-0.00827
5.64484	0.163595		3.133	-0.00858
5.64844	0.162528		3.135	-0.00732
5.65204	0.162027		3.137	-0.00763
5.65564	0.162021		3.139	-0.00746
5.65924	0.162325		3.141	-0.00766
5.66284	0.162772		3.143	-0.00767
5.66644	0.163225		3.145	-0.00736
5.67004	0.163595		3.147	-0.00723
5.67364	0.163803		3.149	-0.00733
5.67724	0.163845		3.151	-0.00904
5.68084	0.163762		3.153	-0.00818
5.68444	0.163684		3.155	-0.00847
5.68804	0.163714		3.157	-0.00767
5.69164	0.163839		3.159	-0.00759
5.69524	0.163994		3.161	-0.00709
5.69884	0.164042		3.163	-0.00702
5.70244	0.163869		3.165	-0.00655
5.70604	0.16341		3.167	-0.00678
5.70964	0.162629		3.169	-0.00886
5.71324	0.161526		3.171	-0.00879
5.71684	0.160185		3.173	-0.00925
5.72044	0.158755		3.175	-0.00879
5.72404	0.157444		3.177	-0.00819
5.72764	0.156514		3.179	-0.00871
5.73124	0.156168		3.181	-0.00931
5.73484	0.156579		3.183	-0.0099
5.73844	0.157789		3.185	-0.01078
5.74204	0.159714		3.187	-0.01083
5.74564	0.16214		3.189	-0.01139
5.74924	0.164691		3.191	-0.01103
5.75284	0.166968		3.193	-0.01053
5.75644	0.1685		3.195	-0.00983
5.76004	0.168923		3.197	-0.00966
5.76364	0.168047		3.199	-0.01088
5.76724	0.165955		3.201	-0.01181
5.77084	0.162957		3.203	-0.01327
5.77444	0.159559		3.205	-0.01425
5.77804	0.156365		3.207	-0.015
5.78164	0.153939		3.209	-0.01332
5.78524	0.152741		3.211	-0.01362
5.78884	0.152949		3.213	-0.01336
5.79244	0.154428		3.215	-0.01376
5.79604	0.15677		3.217	-0.01538
5.79964	0.15941		3.219	-0.0166
5.80324	0.161801		3.221	-0.01711
5.80684	0.163493		3.223	-0.01589
5.81044	0.164209		3.225	-0.01527
5.81404	0.163869		3.227	-0.01433
5.81764	0.162665		3.229	-0.01269
5.82124	0.160954		3.231	-0.01233
5.82484	0.159154		3.233	-0.01151
5.82844	0.157593		3.235	-0.01214
5.83204	0.156424		3.237	-0.01213
5.83564	0.155626		3.239	-0.01224
5.83924	0.155083		3.241	-0.01144
5.84284	0.154594		3.243	-0.01197
5.84644	0.153921		3.245	-0.01272
5.85004	0.15292		3.247	-0.01316
5.85364	0.151549		3.249	-0.01438
5.85724	0.149886		3.251	-0.01536
5.86084	0.148163		3.253	-0.01457
5.86444	0.146607		3.255	-0.01605
5.86804	0.145433		3.257	-0.0178
5.87164	0.144766		3.259	-0.01913
5.87524	0.144658		3.261	-0.02022
5.87884	0.14507		3.263	-0.02028
5.88244	0.145946		3.265	-0.01971
5.88604	0.147203		3.267	-0.01981
5.88964	0.148825		3.269	-0.02012
5.89324	0.150786		3.271	-0.01922
5.89684	0.153128		3.273	-0.02075
5.90044	0.155822		3.275	-0.02177
5.90404	0.158797		3.277	-0.02267
5.90764	0.161878		3.279	-0.02358
5.91124	0.164829		3.281	-0.02239
5.91484	0.167445		3.283	-0.0225
5.91844	0.169519		3.285	-0.02262
5.92204	0.170932		3.287	-0.02276
5.92564	0.171618		3.289	-0.02359
5.92924	0.171635		3.291	-0.02345
5.93284	0.171159		3.293	-0.02278
5.93644	0.170449		3.295	-0.02375
5.94004	0.16974		3.297	-0.02522
5.94364	0.169186		3.299	-0.02409
5.94724	0.168816		3.301	-0.02358
5.95084	0.16859		3.303	-0.02438
5.95444	0.168423		3.305	-0.02504
5.95804	0.168232		3.307	-0.02696
5.96164	0.167928		3.309	-0.02763
5.96524	0.167409		3.311	-0.02719
5.96884	0.166581		3.313	-0.0284
5.97244	0.165401		3.315	-0.02952
5.97604	0.163929		3.317	-0.03113
5.97964	0.162277		3.319	-0.03227
5.98324	0.160585		3.321	-0.03193
5.98684	0.15891		3.323	-0.03081
5.99044	0.157277		3.325	-0.03106
5.99404	0.155715		3.327	-0.03197
5.99764	0.154332		3.329	-0.0321
6.00124	0.153212		3.331	-0.03126
6.00484	0.152395		3.333	-0.0299
6.00844	0.151817		3.335	-0.02967
6.01204	0.151417		3.337	-0.02947
6.01564	0.151197		3.339	-0.02904
6.01924	0.151185		3.341	-0.0285
6.02284	0.1514		3.343	-0.02719
6.02644	0.151781		3.345	-0.02738
6.03004	0.152264		3.347	-0.02776
6.03364	0.152836		3.349	-0.02841
6.03724	0.153551		3.351	-0.02791
6.04084	0.154505		3.353	-0.02742
6.04444	0.155715		3.355	-0.02808
6.04804	0.157157		3.357	-0.02821
6.05164	0.158755		3.359	-0.02869
6.05524	0.160388		3.361	-0.02772
6.05884	0.161908		3.363	-0.02713
6.06244	0.163106		3.365	-0.02781
6.06604	0.163756		3.367	-0.02732
6.06964	0.163702		3.369	-0.02758
6.07324	0.162868		3.371	-0.02757
6.07684	0.161354		3.373	-0.02627
6.08044	0.159381		3.375	-0.02425
6.08404	0.157247		3.377	-0.02249
6.08764	0.155232		3.379	-0.01936
6.09124	0.153492		3.381	-0.01709
6.09484	0.152109		3.383	-0.01337
6.09844	0.15106		3.385	-0.0092
6.10204	0.150327		3.387	-0.00534
6.10564	0.14985		3.389	-0.00146
6.10924	0.149546		3.391	0.002341
6.11284	0.149331		3.393	0.006672
6.11644	0.149212		3.395	0.012358
6.12004	0.149242		3.397	0.017813
6.12364	0.149486		3.399	0.022958
6.12724	0.149969		3.401	0.02962
6.13084	0.150589		3.403	0.034864
6.13444	0.151233		3.405	0.041116
6.13804	0.151829		3.407	0.046111
6.14164	0.152353		3.409	0.050315
6.14524	0.152854		3.411	0.056115
6.14884	0.153396		3.413	0.062077
6.15244	0.154088		3.415	0.067611
6.15604	0.155036		3.417	0.072516
6.15964	0.156311		3.419	0.077345
6.16324	0.157914		3.421	0.081452
6.16684	0.159732		3.423	0.085094
6.17044	0.161556		3.425	0.087813
6.17404	0.163172		3.427	0.090174
6.17764	0.164393		3.429	0.092523
6.18124	0.165073		3.431	0.095935
6.18484	0.16515		3.433	0.098321
6.18844	0.164644		3.435	0.100667
6.19204	0.163648		3.437	0.103265
6.19564	0.162313		3.439	0.104371
6.19924	0.160811		3.441	0.106073
6.20284	0.159345		3.443	0.109425
6.20644	0.158141		3.445	0.11125
6.21004	0.157414		3.447	0.113193
6.21364	0.157289		3.449	0.114801
6.21724	0.157736		3.451	0.115579
6.22084	0.158618		3.453	0.116601
6.22444	0.15975		3.455	0.117102
6.22804	0.160978		3.457	0.117944
6.23164	0.162099		3.459	0.11927
6.23524	0.162939		3.461	0.118971
6.23884	0.163338		3.463	0.119374
6.24244	0.163332		3.465	0.120832
6.24604	0.163076		3.467	0.119591
6.24964	0.162772		3.469	0.117551
6.25324	0.162528		3.471	0.117689
6.25684	0.162289		3.473	0.118796
6.26044	0.161932		3.475	0.119841
6.26404	0.161324		3.477	0.119841
6.26764	0.160358		3.479	0.11803
6.27124	0.158928		3.481	0.116819
6.27484	0.156973		3.483	0.114398
6.27844	0.154559		3.485	0.112371
6.28204	0.151912		3.487	0.109749
6.28564	0.149367		3.489	0.106205
6.28924	0.147227		3.491	0.10337
6.29284	0.145684		3.493	0.100383
6.29644	0.144813		3.495	0.097913
6.30004	0.144557		3.497	0.094511
6.30364	0.144795		3.499	0.090437
6.30724	0.145338		3.501	0.086176
6.31084	0.145958		3.503	0.084093
6.31444	0.146494		3.505	0.081908
6.31804	0.14687		3.507	0.080111
6.32164	0.147108		3.509	0.078209
6.32524	0.147293		3.511	0.076576
6.32884	0.147519		3.513	0.075591
6.33244	0.147841		3.515	0.074903
6.33604	0.148264		3.517	0.074579
6.33964	0.148747		3.519	0.073475
6.34324	0.149248		3.521	0.070381
6.34684	0.149719		3.523	0.068073
6.35044	0.150112		3.525	0.066718
6.35404	0.150428		3.527	0.065216
6.35764	0.15072		3.529	0.063011
6.36124	0.151078		3.531	0.062387
6.36484	0.151584		3.533	0.062284
6.36844	0.152306		3.535	0.061646
6.37204	0.153224		3.537	0.059343
6.37564	0.154243		3.539	0.057983
6.37924	0.155196		3.541	0.056127
6.38284	0.155918		3.543	0.054527
6.38644	0.156293		3.545	0.054494
6.39004	0.156287		3.547	0.054479
6.39364	0.155888		3.549	0.054156
6.39724	0.155149		3.551	0.054091
6.40084	0.154177		3.553	0.054716
6.40444	0.153098		3.555	0.05377
6.40804	0.152049		3.557	0.052011
6.41164	0.15106		3.559	0.051186
6.41524	0.150094		3.561	0.052202
6.41884	0.149093		3.563	0.053192
6.42244	0.148044		3.565	0.054907
6.42604	0.146977		3.567	0.054698
6.42964	0.145946		3.569	0.05545
6.43324	0.145016		3.571	0.056505
6.43684	0.144289		3.573	0.056389
6.44044	0.143931		3.575	0.057192
6.44404	0.144128		3.577	0.057697
6.44764	0.144998		3.579	0.057121
6.45124	0.146536		3.581	0.05741
6.45484	0.148604		3.583	0.057049
6.45844	0.151012		3.585	0.055763
6.46204	0.153492		3.587	0.054355
6.46564	0.155751		3.589	0.053498
6.46924	0.157479		3.591	0.053274
6.47284	0.158332		3.593	0.052855
6.47644	0.158063		3.595	0.052505
6.48004	0.156609		3.597	0.052234
6.48364	0.1541		3.599	0.050598
6.48724	0.150804		3.601	0.049469
6.49084	0.147132		3.603	0.049034
6.49444	0.14352		3.605	0.049495
6.49804	0.140438		3.607	0.049801
6.50164	0.138263		3.609	0.04983
6.50524	0.137255		3.611	0.050248
6.50884	0.137452		3.613	0.051421
6.51244	0.138722		3.615	0.052198
6.51604	0.14079		3.617	0.052767
6.51964	0.143305		3.619	0.053208
6.52324	0.145898		3.621	0.052693
6.52684	0.148199		3.623	0.052793
6.53044	0.149939		3.625	0.053001
6.53404	0.150988		3.627	0.052822
6.53764	0.15128		3.629	0.0522
6.54124	0.150798		3.631	0.051112
6.54484	0.149558		3.633	0.050109
6.54844	0.147722		3.635	0.050667
6.55204	0.145546		3.637	0.050792
6.55564	0.143329		3.639	0.049861
6.55924	0.14135		3.641	0.049323
6.56284	0.139872		3.643	0.047756
6.56644	0.139169		3.645	0.046684
6.57004	0.13952		3.647	0.047146
6.57364	0.141034		3.649	0.047539
6.57724	0.143568		3.651	0.047682
6.58084	0.146744		3.653	0.047769
6.58444	0.150076		3.655	0.047406
6.58804	0.153128		3.657	0.047022
6.59164	0.155483		3.659	0.046807
6.59524	0.156824		3.661	0.045331
6.59884	0.156949		3.663	0.044233
6.60244	0.155918		3.665	0.043881
6.60604	0.154141		3.667	0.043988
6.60964	0.152157		3.669	0.044248
6.61324	0.15047		3.671	0.04341
6.61684	0.149445		3.673	0.042132
6.62044	0.149236		3.675	0.04211
6.62404	0.149844		3.677	0.04341
6.62764	0.151137		3.679	0.04466
6.63124	0.152812		3.681	0.04502
6.63484	0.154445		3.683	0.045496
6.63844	0.155632		3.685	0.045975
6.64204	0.156138		3.687	0.047656
6.64564	0.155959		3.689	0.048877
6.64924	0.155256		3.691	0.0485
6.65284	0.154314		3.693	0.046771
6.65644	0.153396		3.695	0.047152
6.66004	0.152765		3.697	0.046598
6.66364	0.152544		3.699	0.046023
6.66724	0.152753		3.701	0.046362
6.67084	0.153241		3.703	0.045644
6.67444	0.153808		3.705	0.044828
6.67804	0.154201		3.707	0.044507
6.68164	0.154249		3.709	0.043858
6.68524	0.153814		3.711	0.042352
6.68884	0.152878		3.713	0.041683
6.69244	0.151543		3.715	0.04129
6.69604	0.150029		3.717	0.041934
6.69964	0.148551		3.719	0.042056
6.70324	0.147257		3.721	0.041011
6.70684	0.146178		3.723	0.040064
6.71044	0.145326		3.725	0.037673
6.71404	0.144694		3.727	0.037752
6.71764	0.144289		3.729	0.03828
6.72124	0.144038		3.731	0.038203
6.72484	0.143836		3.733	0.037059
6.72844	0.143609		3.735	0.037166
6.73204	0.143401		3.737	0.037565
6.73564	0.143305		3.739	0.036869
6.73924	0.143371		3.741	0.035832
6.74284	0.143585		3.743	0.036161
6.74644	0.143878		3.745	0.0372
6.75004	0.144217		3.747	0.038757
6.75364	0.144605		3.749	0.039512
6.75724	0.145034		3.751	0.040464
6.76084	0.145445		3.753	0.041128
6.76444	0.145749		3.755	0.042412
6.76804	0.145886		3.757	0.042672
6.77164	0.14585		3.759	0.041588
6.77524	0.145654		3.761	0.040525
6.77884	0.14538		3.763	0.041171
6.78244	0.145087		3.765	0.042203
6.78604	0.144885		3.767	0.042105
6.78964	0.144879		3.769	0.041035
6.79324	0.145207		3.771	0.039405
6.79684	0.145988		3.773	0.037637
6.80044	0.147293		3.775	0.036756
6.80404	0.149039		3.777	0.035372
6.80764	0.151012		3.779	0.033819
6.81124	0.15286		3.781	0.032729
6.81484	0.154255		3.783	0.033062
6.81844	0.154958		3.785	0.03284
6.82204	0.154821		3.787	0.031928
6.82564	0.15379		3.789	0.031638
6.82924	0.151924		3.791	0.031672
6.83284	0.149433		3.793	0.031393
6.83644	0.146661		3.795	0.031676
6.84004	0.144021		3.797	0.03215
6.84364	0.141869		3.799	0.03155
6.84724	0.140409		3.801	0.030486
6.85084	0.139657		3.803	0.029509
6.85444	0.139556		3.805	0.029747
6.85804	0.139985		3.807	0.030836
6.86164	0.140826		3.809	0.032033
6.86524	0.141893		3.811	0.032196
6.86884	0.143031		3.813	0.031723
6.87244	0.144098		3.815	0.031619
6.87604	0.145016		3.817	0.031535
6.87964	0.145731		3.819	0.031865
6.88324	0.146196		3.821	0.032408
6.88684	0.146321		3.823	0.03333
6.89044	0.146035		3.825	0.035433
6.89404	0.145314		3.827	0.036768
6.89764	0.144199		3.829	0.036718
6.90124	0.142787		3.831	0.036624
6.90484	0.141255		3.833	0.036411
6.90844	0.139824		3.835	0.036481
6.91204	0.138793		3.837	0.036139
6.91564	0.138406		3.839	0.0357
6.91924	0.138823		3.841	0.03518
6.92284	0.140069		3.843	0.035343
6.92644	0.142018		3.845	0.034876
6.93004	0.144444		3.847	0.032933
6.93364	0.147078		3.849	0.032063
6.93724	0.149635		3.851	0.0322
6.94084	0.151847		3.853	0.032138
6.94444	0.15348		3.855	0.031903
6.94804	0.154445		3.857	0.031869
6.95164	0.154737		3.859	0.031915
6.95524	0.154517		3.861	0.032691
6.95885	0.153992		3.863	0.032203
6.96244	0.153361		3.865	0.031448
6.96605	0.152806		3.867	0.031144
6.96964	0.152425		3.869	0.031265
6.97325	0.152282		3.871	0.03172
6.97684	0.152365		3.873	0.032031
6.98044	0.152645		3.875	0.032687
6.98405	0.153027		3.877	0.032805
6.98764	0.153414		3.879	0.032785
6.99125	0.153688		3.881	0.032544
6.99484	0.153748		3.883	0.03178
6.99845	0.153599		3.885	0.031052
7.00204	0.153247		3.887	0.030299
7.00565	0.152782		3.889	0.031196
7.00924	0.152264		3.891	0.032363
7.01285	0.151775		3.893	0.032576
7.01645	0.151406		3.895	0.033142
7.02004	0.151227		3.897	0.033913
7.02365	0.151263		3.899	0.032751
7.02724	0.151489		3.901	0.031476
7.03085	0.15187		3.903	0.031139
7.03444	0.152341		3.905	0.030096
7.03805	0.152824		3.907	0.028964
7.04164	0.153229		3.909	0.029244
7.04525	0.153468		3.911	0.030309
7.04885	0.153474		3.913	0.030121
7.05244	0.153253		3.915	0.029527
7.05605	0.152794		3.917	0.028267
7.05964	0.152103		3.919	0.026841
7.06325	0.151203		3.921	0.026779
7.06684	0.150172		3.923	0.026421
7.07045	0.149123		3.925	0.025483
7.07404	0.148139		3.927	0.026145
7.07765	0.147203		3.929	0.026842
7.08125	0.14628		3.931	0.026969
7.08484	0.145314		3.933	0.026311
7.08845	0.144301		3.935	0.024661
7.09204	0.14324		3.937	0.024268
7.09565	0.142101		3.939	0.02441
7.09924	0.140903		3.941	0.023725
7.10285	0.139777		3.943	0.023452
7.10644	0.138948		3.945	0.022632
7.11005	0.138638		3.947	0.022108
7.11365	0.138924		3.949	0.022435
7.11725	0.139777		3.951	0.022269
7.12085	0.141094		3.953	0.021176
7.12445	0.142739		3.955	0.019591
7.12805	0.144503		3.957	0.018248
7.13165	0.146125		3.959	0.019112
7.13525	0.147323		3.961	0.019852
7.13885	0.147919		3.963	0.01929
7.14245	0.147913		3.965	0.018761
7.14605	0.147424		3.967	0.018146
7.14965	0.146643		3.969	0.017559
7.15325	0.145737		3.971	0.016796
7.15685	0.144831		3.973	0.015886
7.16045	0.144032		3.975	0.014862
7.16405	0.143419		3.977	0.01453
7.16765	0.143037		3.979	0.015036
7.17125	0.142858		3.981	0.016101
7.17485	0.142834		3.983	0.016212
7.17845	0.142882		3.985	0.014523
7.18205	0.143001		3.987	0.014075
7.18565	0.143234		3.989	0.014501
[truncated: 10,514 more rows]
