# Supplementary material for: Functional implications of the exon 9 splice insert in GluK1 kainate receptors
Source: eLife. 2024 Nov 6;12:RP89755. doi: 10.7554/eLife.89755 (PMC11540303; doi:10.7554/eLife.89755)
Supplement: Figure 6—figure supplement 3—source data 3. [file elife-89755-fig6-figsupp3-data3.xlsx]

## Sheet: Figure 6-figure supplement 3 
B and C
High-affinity agonist/antagonist test	10 mM Glu	10 µM UBP301	2 mM SYM2081	10 mM Glu after Wash	% enhancement in SYM	% peak in Glu post wash
Cell 5	547	0	754	474	137.843	86.6545
Cell 6	60	0	83	48	138.333	80
Cell 7	593	0	1289	556	217.369	93.7605
				Mean	164.515	86.805
				SEM	26.4275	3.97304
				N	3	3
D
GluK1-1aEM	% Recovery						Relative amplitude
Time (s)	Cell 2	Cell 3	Cell 4	Mean	SEM	N	Cell 2	Cell 3	Cell 4	Mean	SEM
0.5	7.13092	6.07203	4.85203	6.01833	0.658406	3	0.0713092	0.0607203	0.0485203	0.0601833	0.00658406
1	20.279	17.5155	18.3134	18.7027	0.821148	3	0.20279	0.175155	0.183134	0.187027	0.00821148
2	43.1542	45.3202	43.6875	44.054	0.651558	3	0.431542	0.453202	0.436875	0.44054	0.00651558
3	61.9948	64.3732	62.895	63.0877	0.693287	3	0.619948	0.643732	0.62895	0.630877	0.00693287
4
5	77.1518	82.6708	78.6609	79.4945	1.64681	3	0.771518	0.826708	0.786609	0.794945	0.0164681
6
7	84.3268	93.3611	87.5165	88.4015	2.64526	3	0.843268	0.933611	0.875165	0.884015	0.0264526
10	89.0084	95.5473	93.315	92.6236	1.91902	3	0.890084	0.955473	0.93315	0.926236	0.0191902
15	96.2579	99.9084	95.2604	97.1422	1.41274	3	0.962579	0.999084	0.952604	0.971422	0.0141274
	GluK1-1a			GluK1-1aEM
Time (s)	Mean	SEM	N	Mean	SEM	N
0.5	0.1044	0.0166803	4	0.0601833	0.0066	3
1	0.1845	0.00932013	4	0.187027	0.0082	3
2	0.3743	0.0215559	4	0.44054	0.0065	3
3	0.5005	0.0290965	4	0.630877	0.0069	3
4	0.6981	0.0490472	4
5	0.7566	0.038609	4	0.794945	0.0165	3
6	0.7685	0.037561	4
7	0.7681	0.0290384	4	0.884015	0.0265	3
8	0.89	0.0234819	4
9	0.8321	0.0713973	4
10	0.8778	0.0578709	4	0.926236	0.0192	3
15				0.971422	0.0141	3
