# Supplementary material for: Functional implications of the exon 9 splice insert in GluK1 kainate receptors
Source: eLife. 2024 Nov 6;12:RP89755. doi: 10.7554/eLife.89755 (PMC11540303; doi:10.7554/eLife.89755)
Supplement: Figure 6—figure supplement 5—source data 1. [file elife-89755-fig6-figsupp5-data1.xls]

## Sheet: Figure 6-figure supplement 5
A				D				G
GluK1-1aEM ND				GluK1-1aEM DDM ECD				GluK1-1aEM DDM FL
Frequency	No mask (8.5 Å)	Tight mask (5.2 Å)		Frequency	No mask (11 Å)	Tight mask (7.8 Å)		Frequency	No mask (11 Å)	Tight mask (7.9 Å)
0.001385	1	1		0.001415	1	1		0.001415	1	1
0.004156	0.999291	0.999997		0.004246	0.998395	0.999994		0.004246	0.999123	0.999995
0.006926	0.999004	0.999986		0.007077	0.997574	0.999966		0.007077	0.99815	0.999958
0.009696	0.996135	0.999963		0.009907	0.991335	0.999817		0.009907	0.994001	0.999862
0.012467	0.995406	0.999965		0.012738	0.983718	0.99973		0.012738	0.98523	0.999677
0.015237	0.995668	0.999959		0.015568	0.98444	0.999686		0.015568	0.984232	0.999623
0.018008	0.995023	0.999921		0.018399	0.98312	0.99961		0.018399	0.983756	0.999381
0.020778	0.99221	0.999852		0.02123	0.98162	0.999351		0.02123	0.981058	0.999082
0.023548	0.98876	0.999785		0.02406	0.974476	0.999032		0.02406	0.975993	0.998888
0.026319	0.981651	0.999603		0.026891	0.963254	0.998638		0.026891	0.966599	0.998527
0.029089	0.972198	0.999038		0.029721	0.929278	0.997324		0.029721	0.931467	0.996556
0.031859	0.960471	0.998396		0.032552	0.895568	0.994073		0.032552	0.900619	0.994892
0.03463	0.934512	0.997645		0.035383	0.810206	0.991041		0.035383	0.828108	0.991038
0.0374	0.904588	0.996874		0.038213	0.743391	0.986943		0.038213	0.728428	0.986053
0.040171	0.868309	0.996299		0.041044	0.643709	0.98333		0.041044	0.658344	0.983516
0.042941	0.840666	0.994551		0.043875	0.588353	0.978238		0.043875	0.573432	0.977206
0.045711	0.869017	0.993527		0.046705	0.594917	0.972466		0.046705	0.595019	0.971592
0.048482	0.854961	0.992513		0.049536	0.587596	0.961634		0.049536	0.578696	0.964208
0.051252	0.817656	0.988449		0.052366	0.561491	0.940949		0.052366	0.532393	0.938543
0.054023	0.787468	0.984402		0.055197	0.501766	0.92255		0.055197	0.456595	0.918048
0.056793	0.777533	0.979768		0.058028	0.46727	0.904772		0.058028	0.432291	0.90474
0.059563	0.748951	0.972448		0.060858	0.429565	0.872578		0.060858	0.397474	0.869567
0.062334	0.697095	0.965667		0.063689	0.370146	0.83148		0.063689	0.300487	0.834142
0.065104	0.668793	0.963389		0.066519	0.338369	0.808879		0.066519	0.274616	0.820033
0.067875	0.661813	0.958893		0.06935	0.300733	0.791055		0.06935	0.282442	0.813131
0.070645	0.667072	0.955684		0.072181	0.297079	0.776146		0.072181	0.276493	0.783243
0.073415	0.645251	0.952354		0.075011	0.261178	0.756994		0.075011	0.240764	0.750542
0.076186	0.642384	0.948584		0.077842	0.242805	0.734028		0.077842	0.212487	0.733111
0.078956	0.64364	0.944692		0.080673	0.222653	0.69281		0.080673	0.180929	0.700706
0.081727	0.610426	0.939687		0.083503	0.192406	0.649251		0.083503	0.172012	0.658941
0.084497	0.589113	0.933279		0.086334	0.172271	0.636636		0.086334	0.179151	0.632779
0.087267	0.573344	0.925416		0.089164	0.165234	0.616758		0.089164	0.149193	0.617535
0.090038	0.546378	0.916714		0.091995	0.138156	0.571993		0.091995	0.131494	0.586445
0.092808	0.519823	0.904189		0.094826	0.111964	0.536503		0.094826	0.111839	0.546707
0.095578	0.494475	0.891775		0.097656	0.103528	0.513506		0.097656	0.092234	0.520285
0.098349	0.406938	0.869731		0.100487	0.075928	0.486349		0.100487	0.09233	0.492714
0.101119	0.367404	0.840637		0.103317	0.077765	0.427682		0.103317	0.086551	0.46269
0.10389	0.306313	0.807788		0.106148	0.053317	0.360614		0.106148	0.07755	0.422785
0.10666	0.248864	0.771086		0.108979	0.05093	0.303696		0.108979	0.058266	0.366283
0.10943	0.24841	0.744342		0.111809	0.04458	0.265284		0.111809	0.039413	0.319127
0.112201	0.204131	0.7255		0.11464	0.027466	0.243493		0.11464	0.035074	0.279538
0.114971	0.175433	0.697443		0.117471	0.053211	0.2443		0.117471	0.008899	0.247523
0.117742	0.135175	0.651057		0.120301	0.027689	0.232281		0.120301	0.011682	0.207098
0.120512	0.11977	0.603191		0.123132	0.01213	0.209881		0.123132	0.004649	0.175255
0.123282	0.096761	0.559475		0.125962	0.018192	0.176822		0.125962	0.014189	0.144629
0.126053	0.073365	0.513263		0.128793	0.013905	0.133108		0.128793	0.016304	0.125376
0.128823	0.0655	0.468377		0.131624	0.003253	0.098101		0.131624	0.002435	0.100687
0.131594	0.064966	0.422043		0.134454	-0.00946	0.090403		0.134454	0.000881	0.078823
0.134364	0.047931	0.381786		0.137285	0.001593	0.074171		0.137285	0.001819	0.061198
0.137134	0.026222	0.345606		0.140115	0.000421	0.048831		0.140115	0.002789	0.035995
0.139905	0.022137	0.304383		0.142946	-0.00404	0.038946		0.142946	0.003332	0.027489
0.142675	0.019032	0.265286		0.145777	-0.00427	0.027421		0.145777	-0.00416	0.032168
0.145445	0.025124	0.250357		0.148607	-0.00315	0.033848		0.148607	-0.0013	0.01854
0.148216	0.024609	0.23892		0.151438	0.003506	0.025341		0.151438	0.005727	0.011545
0.150986	0.028182	0.230938		0.154269	0.006295	0.042189		0.154269	-0.00175	0.041599
0.153757	0.014741	0.23284		0.157099	0.003896	0.044261		0.157099	-0.0087	0.027389
0.156527	0.009009	0.222574		0.15993	0.00925	0.030364		0.15993	0.001622	0.021164
0.159297	0.01343	0.209594		0.16276	-0.00712	0.011743		0.16276	0.000503	0.028487
0.162068	0.009888	0.198405		0.165591	-0.00169	0.019088		0.165591	-0.00195	0.01989
0.164838	0.011081	0.188131		0.168422	0.001579	0.029752		0.168422	0.00555	0.035648
0.167609	0.013314	0.179655		0.171252	0.006599	0.026514		0.171252	0.003	0.034375
0.170379	0.013092	0.17031		0.174083	-0.00845	0.020395		0.174083	0.006077	0.025189
0.173149	0.01193	0.175646		0.176913	0.005233	0.028326		0.176913	0.004199	0.007976
0.17592	0.013648	0.182955		0.179744	-0.00091	0.035659		0.179744	-0.00094	0.001419
0.17869	0.003818	0.176563		0.182575	-0.00353	0.034232		0.182575	0.002498	0.010613
0.181461	0.004823	0.168676		0.185405	0.006796	0.020045		0.185405	0.002445	0.005923
0.184231	0.017067	0.155358		0.188236	-0.00642	0.007826		0.188236	0.006663	0.018127
0.187001	0.005318	0.157127		0.191067	0.006072	0.006446		0.191067	-0.00467	0.031286
0.189772	0.012513	0.151643		0.193897	-0.00161	0.007111		0.193897	0.001291	0.027908
0.192542	0.005952	0.135047		0.196728	-0.00089	0.009821		0.196728	0.002172	0.015203
0.195313	0.005138	0.107194		0.199558	0.005496	0.022308		0.199558	-0.00101	0.019596
0.198083	0.006034	0.09836		0.202389	-0.00453	0.027354		0.202389	-0.00117	0.015244
0.200853	-0.00186	0.086298		0.20522	-0.00275	0.01459		0.20522	-0.0026	0.008428
0.203624	-0.00203	0.07702		0.20805	-0.00109	0.01745		0.20805	-0.00079	-0.00614
0.206394	-0.00376	0.066304		0.210881	0.000602	0.023622		0.210881	0.006857	-0.00739
0.209164	0.002332	0.065678		0.213712	0.004388	0.00867		0.213712	-0.00205	0.004672
0.211935	0.001704	0.061249		0.216542	-0.00361	0.001036		0.216542	0.002567	0.000618
0.214705	-0.00186	0.064685		0.219373	0.001605	0.009075		0.219373	-0.00132	-0.00515
0.217476	0.001249	0.07298		0.222203	0.000178	0.020138		0.222203	0.00726	0.000991
0.220246	0.001595	0.072941		0.225034	0.003743	0.01966		0.225034	-0.00391	-0.0139
0.223016	-0.00318	0.049539		0.227865	0.004282	0.004436		0.227865	-0.00123	-0.03174
0.225787	-0.00392	0.012488		0.230695	0.000894	0.000175		0.230695	0.002911	-0.0214
0.228557	-5.1e-05	0.000935		0.233526	0.004438	0.015521		0.233526	-0.00247	-0.01426
0.231328	0.00327	0.003219		0.236356	0.005187	0.023831		0.236356	-0.0002	-0.00557
0.234098	0.000375	0.005603		0.239187	0.003194	0.006888		0.239187	0.001711	0.012057
0.236868	0.000172	0.0102		0.242018	-0.00293	-0.00318		0.242018	0.003453	0.02154
0.239639	0.002771	0.007254		0.244848	-0.00426	-0.00492		0.244848	-0.00293	0.018031
0.242409	-0.00095	-0.00034		0.247679	-0.00168	-0.00891		0.247679	-0.00171	0.009394
0.24518	-0.00267	0.003894		0.25051	0.008074	0.004161		0.25051	-0.0042	0.008064
0.24795	0.002889	-0.00032		0.25334	-0.00124	0.006938		0.25334	0.00064	0.007713
0.25072	0.006188	-0.00497		0.256171	0.003767	0.011252		0.256171	0.007149	0.006265
0.253491	0.001051	0.00677		0.259001	0.003155	0.005959		0.259001	0.006239	-0.00131
0.256261	-0.00183	0.005631		0.261832	0.007711	-0.00461		0.261832	0.001506	-0.01381
0.259031	-0.00119	-0.00287		0.264663	-0.00286	-0.00812		0.264663	0.000161	-0.01647
0.261802	0.001469	0.007893		0.267493	0.001341	-0.00181		0.267493	-0.0012	-0.00925
0.264572	0.004548	0.025029		0.270324	-0.00325	0.002079		0.270324	0.005598	-0.00978
0.267343	-0.00027	0.017658		0.273154	-0.00147	0.001078		0.273154	-0.00144	-0.0103
0.270113	0.00047	-0.0016		0.275985	0.001805	0.007752		0.275985	-0.00607	-0.00195
0.272883	-0.00335	-0.00796		0.278816	-0.00071	0.016486		0.278816	-0.00273	0.002558
0.275654	-0.00362	-0.00722		0.281646	-0.00164	0.010736		0.281646	0.001187	0.012293
0.278424	-0.00216	-0.01068		0.284477	-0.00078	0.009324		0.284477	0.006934	0.012231
0.281195	0.001259	0.001217		0.287308	-0.00085	0.00872		0.287308	0.001657	0.005231
0.283965	0.002394	0.00944		0.290138	0.006274	-0.0015		0.290138	0.003732	0.00812
0.286735	-0.00319	-0.00117		0.292969	0.003238	-0.00832		0.292969	0.000971	0.011408
0.289506	1.8e-05	-0.00189		0.295799	0.000317	0.001378		0.295799	0.002038	0.00962
0.292276	-0.0015	0.001086		0.29863	0.002339	0.012885		0.29863	0.001053	0.007099
0.295047	-0.00071	0.007989		0.301461	0.00126	0.014856		0.301461	-0.00092	0.007814
0.297817	0.001776	0.010977		0.304291	0.005724	0.02661		0.304291	-0.00652	0.009853
0.300587	-0.00232	-0.00324		0.307122	0.000621	0.01925		0.307122	-0.00611	0.001355
0.303358	-0.00031	-0.01405		0.309952	0.002316	0.00129		0.309952	-0.00015	0.001241
0.306128	-0.00036	-0.01123		0.312783	0.00243	0.003691		0.312783	-0.0012	0.005689
0.308898	0.004441	0.005586		0.315614	-0.00272	0.003654		0.315614	0.005457	0.013228
0.311669	0.003346	0.012809		0.318444	0.000781	0.009194		0.318444	0.000258	0.010487
0.314439	0.002694	0.003856		0.321275	0.002677	0.016678		0.321275	-0.00175	0.000413
0.31721	-0.00106	0.003324		0.324106	0.003117	0.018998		0.324106	0.00124	0.001893
0.31998	-0.00133	-0.00268		0.326936	-0.00335	0.009702		0.326936	0.001756	0.012271
0.32275	-0.00169	-0.01015		0.329767	0.00016	0.001685		0.329767	0.001063	0.007475
0.325521	0.001174	0.002529		0.332597	0.001258	0.00995		0.332597	-0.00117	0.008375
0.328291	-0.0003	0.005305		0.335428	-0.00018	0.006852		0.335428	-0.00567	0.005376
0.331062	-0.00185	0.005597		0.338259	0.001486	-7e-06		0.338259	-0.00012	0.002719
0.333832	0.00214	0.006349		0.341089	-0.00086	0.01359		0.341089	-0.00147	0.005932
0.336602	0.000255	0.006498		0.34392	-0.00092	0.022733		0.34392	0.001389	0.007211
0.339373	-0.00122	0.010484		0.34675	0.001923	0.007245		0.34675	-0.0002	0.008955
0.342143	0.001904	0.008397		0.349581	0.001081	-0.00547		0.349581	-0.00135	0.009179
0.344914	-0.00298	-0.00632		0.352412	0.000727	0.000145		0.352412	0.004286	0.005966
0.347684	-0.00345	-0.01191		0.355242	-0.00027	0.002275		0.355242	0.000773	0.009782
