# Supplementary figures and images for: Functional implications of the exon 9 splice insert in GluK1 kainate receptors
Source: eLife journal article supplement (doi:10.7554/elife.89755), 2023-07-26

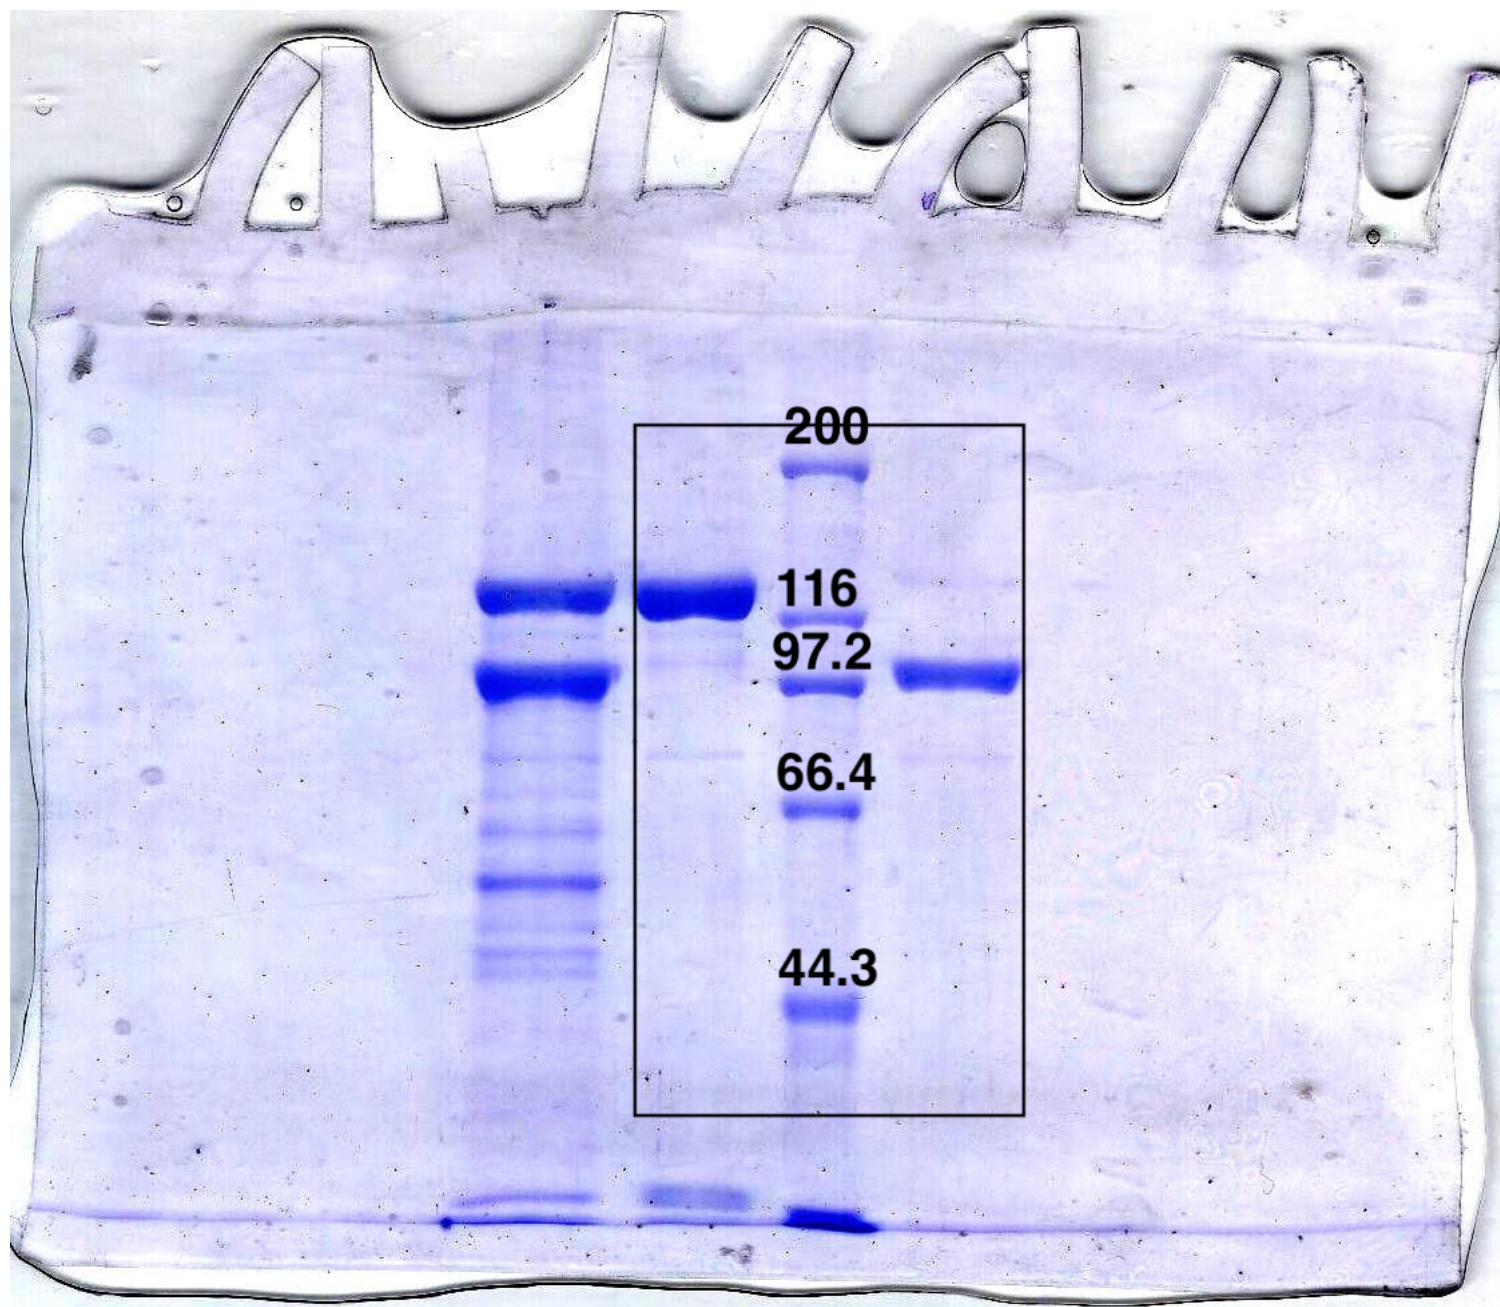

Supplement: fig6-figsupp2-data2 [file elife-89755-fig6-figsupp2-data2-v1.zip]

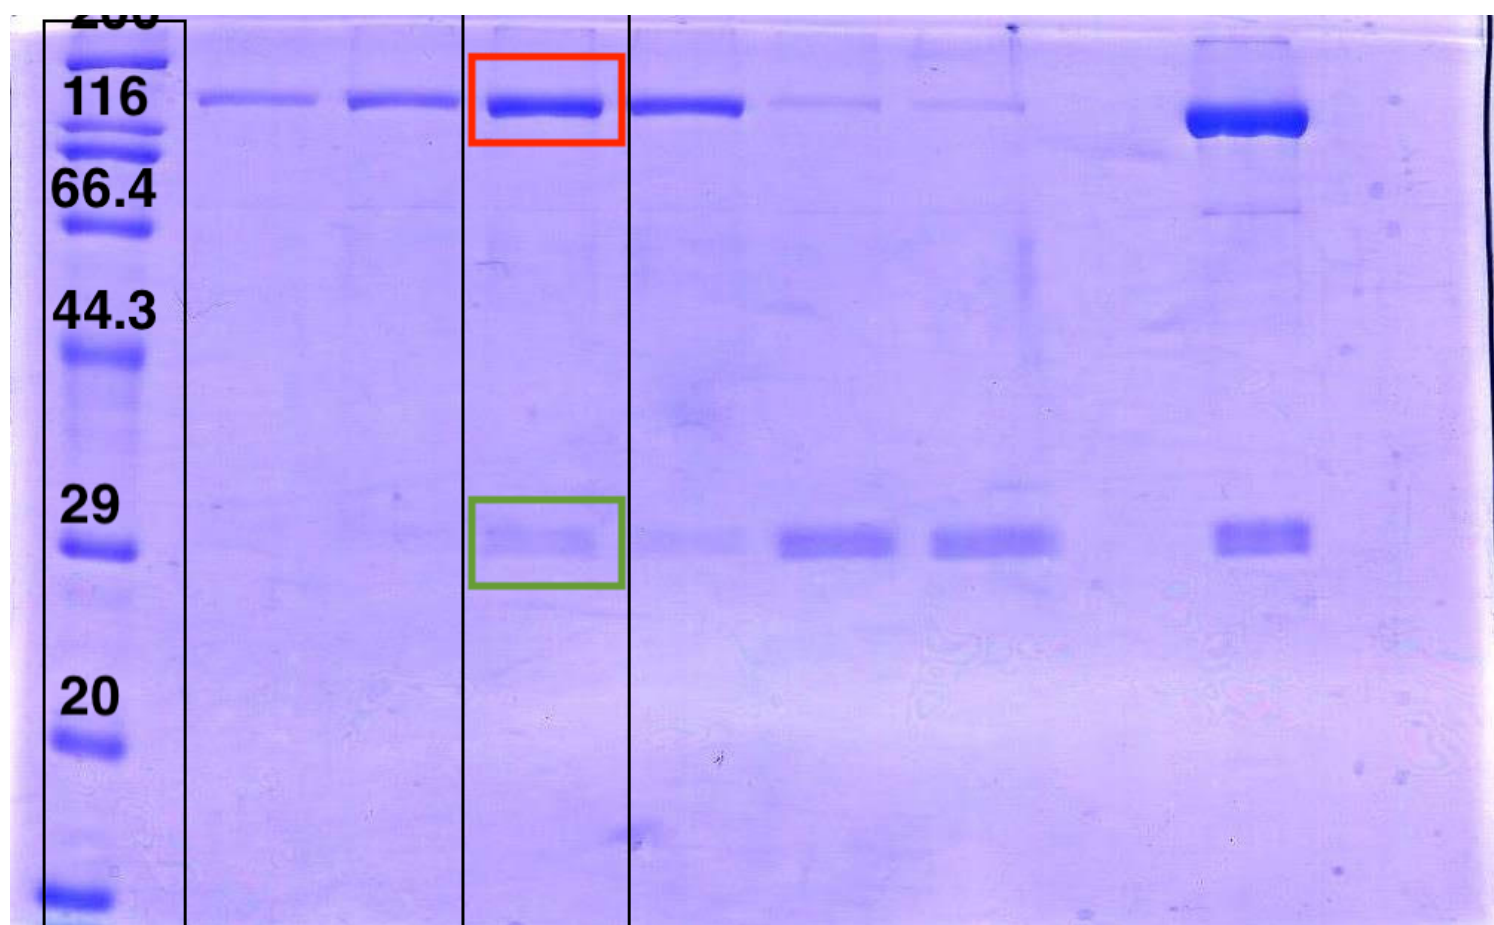

Supplement: fig6-figsupp2-data4 [file elife-89755-fig6-figsupp2-data4-v1.zip]

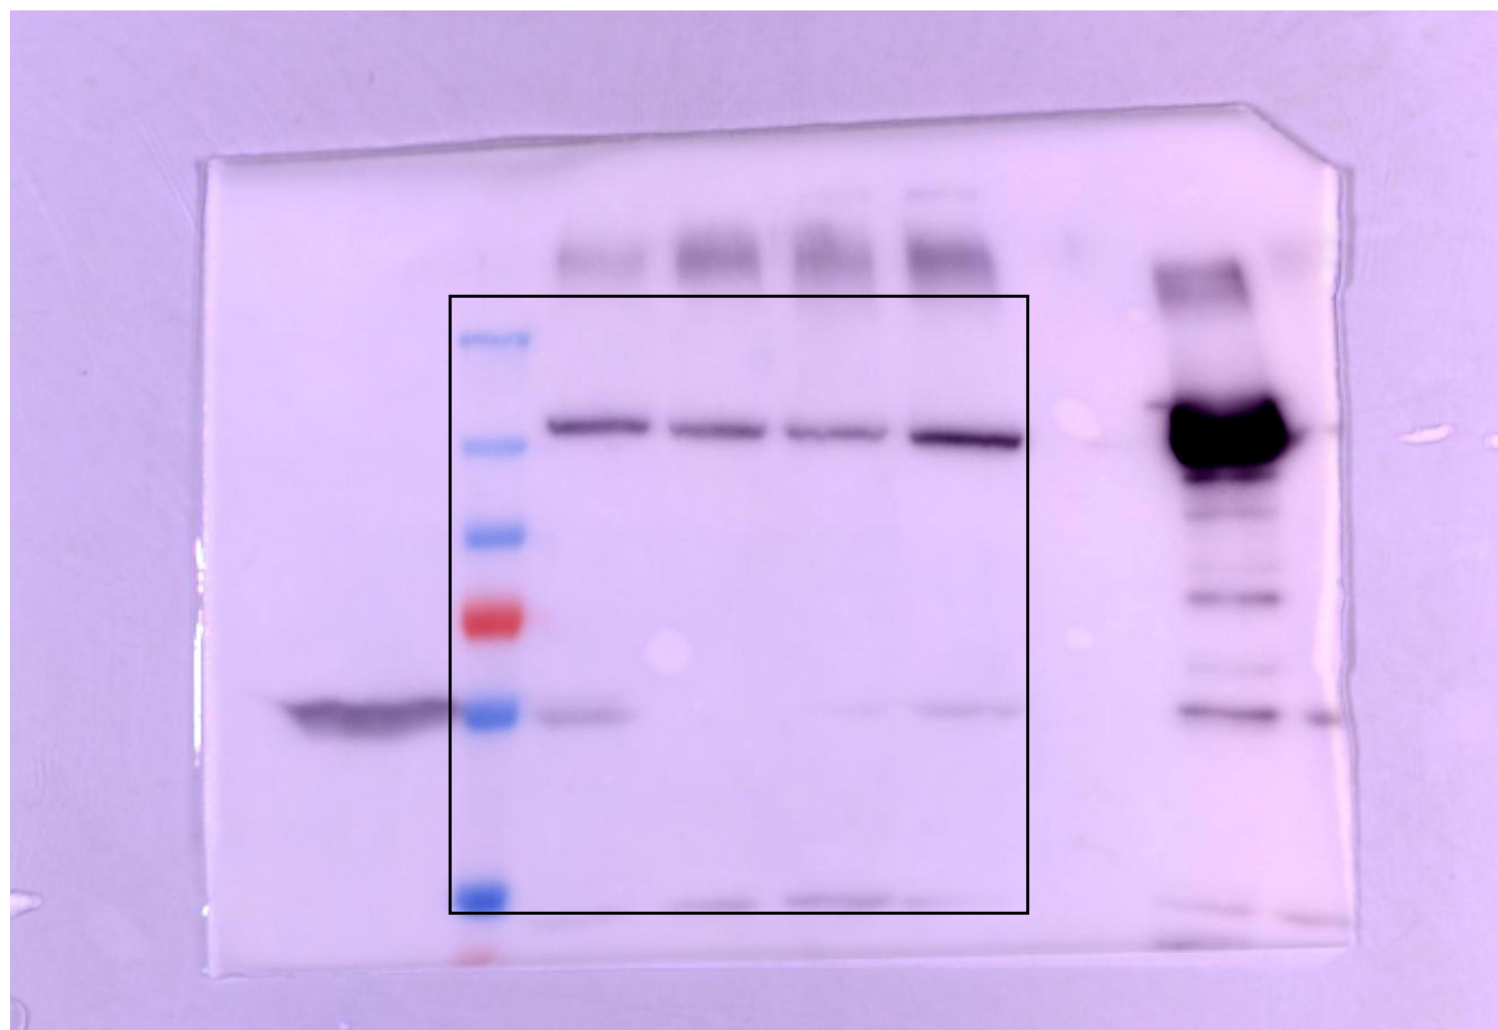

Supplement: fig6-figsupp3-data1 [file elife-89755-fig6-figsupp3-data1-v1.zip]
